# Supplementary material for: Development of a Bioinformatics Framework for Identification and Validation of Genomic Biomarkers and Key Immunopathology Processes and Controllers in Infectious and Non-infectious Severe Inflammatory Response Syndrome
Source: Front Immunol. 2020 Mar 31;11:380. doi: 10.3389/fimmu.2020.00380 (PMC7147506; doi:10.3389/fimmu.2020.00380)
Supplement: Supplementary Information S6 — Table S6.1: ANOVA results for dataset E-GEO 6269, ranked on significance (p-value from lowest to highest). Table S6.2: Results of similar entities analysis for CD177 using dataset E-GEO 6269. Table S6.3: Results of similar entities analysis for FGF13 using dataset E-GEO 6269. Table S6.4: Results of similar entities analysis for GPR84 using dataset E-GEO 6269. Table S6.5: Results of similar entities analysis for KLRK1 using dataset E-GEO 6269. Table S6.6. Results of similar entities analysis for MYL9 using dataset E-GEO 6269. Table S6.7: Results of similar entities analysis for PCOLCE2 using dataset E-GEO 6269. Table S6.8: Results of similar entities analysis for SLC16A3 using dataset E-GEO 6269. Table S6.9: Results of similar entities analysis for TDRD9 using dataset E-GEO 6269. [file Table_6.xlsx]

## Sheet: Table S6.1
Gene Symbol	Probe Set ID	p (Corr)	p	FC ([Influenza B] vs [Influenza A])	Log FC ([Influenza B] vs [Influenza A])	FC (abs) ([Influenza B] vs [Influenza A])	Regulation ([Influenza B] vs [Influenza A])	FC ([S.aureus MRSA] vs [Influenza A])	Log FC ([S.aureus MRSA] vs [Influenza A])	FC (abs) ([S.aureus MRSA] vs [Influenza A])	Regulation ([S.aureus MRSA] vs [Influenza A])	FC ([S.aureus MSSA] vs [Influenza A])	Log FC ([S.aureus MSSA] vs [Influenza A])	FC (abs) ([S.aureus MSSA] vs [Influenza A])	Regulation ([S.aureus MSSA] vs [Influenza A])	FC ([S.pneumoniae] vs [Influenza A])	Log FC ([S.pneumoniae] vs [Influenza A])	FC (abs) ([S.pneumoniae] vs [Influenza A])	Regulation ([S.pneumoniae] vs [Influenza A])	Entrez Gene	UniGene ID	Target Description
SRPR	200917_s_at	0.00186161	8.33245e-08	-1.13901	-0.187778	1.13901	down	-1.00929	-0.0133349	1.00929	down	-1.23799	-0.308	1.23799	down	2.05571	1.03963	2.05571	up	6734	Hs.368376	gb:BG474541 /DB_XREF=gi:13406818 /DB_XREF=602517313F1 /CLONE=IMAGE:4649162 /FEA=FLmRNA /CNT=366 /TID=Hs.75730.0 /TIER=Stack /STK=9 /UG=Hs.75730 /LL=6734 /UG_GENE=SRPR /UG_TITLE=signal recognition particle receptor (docking protein) /FL=gb:NM_003139.1 gb:BC001162.1
	213872_at	0.00186161	1.56469e-07	-1.23576	-0.305394	1.23576	down	-1.96184	-0.972207	1.96184	down	-3.2342	-1.69341	3.2342	down	-1.42147	-0.507382	1.42147	down		Hs.9676	gb:BE465032 /DB_XREF=gi:9510807 /DB_XREF=hv76g09.x1 /CLONE=IMAGE:3179392 /FEA=EST /CNT=34 /TID=Hs.173685.1 /TIER=Stack /STK=15 /UG=Hs.173685 /LL=81688 /UG_GENE=FLJ12619 /UG_TITLE=hypothetical protein FLJ12619
XPO7	208459_s_at	0.00186161	1.65183e-07	-1.11336	-0.154921	1.11336	down	1.18585	0.245917	1.18585	up	1.22518	0.292996	1.22518	up	1.63512	0.709399	1.63512	up	23039	Hs.172685	gb:NM_015024.1 /DB_XREF=gi:11999173 /GEN=RANBP16 /FEA=FLmRNA /CNT=9 /TID=Hs.172685.1 /TIER=FL /STK=0 /UG=Hs.172685 /LL=23039 /DEF=Homo sapiens RAN binding protein 16 (RANBP16), mRNA. /PROD=RAN binding protein 16 /FL=gb:AF064729.1 gb:NM_015024.1
HADHA	208630_at	0.00186161	1.90023e-07	1.14561	0.196117	1.14561	up	1.7425	0.801159	1.7425	up	1.91698	0.938836	1.91698	up	1.74447	0.80279	1.74447	up	3030	Hs.516032	gb:AI972144 /DB_XREF=gi:5768970 /DB_XREF=wr63b03.x1 /CLONE=IMAGE:2492333 /FEA=FLmRNA /CNT=488 /TID=Hs.75860.0 /TIER=Stack /STK=13 /UG=Hs.75860 /LL=3030 /UG_GENE=HADHA /UG_TITLE=hydroxyacyl-Coenzyme A dehydrogenase3-ketoacyl-Coenzyme A thiolaseenoyl-Coenzyme A hydratase (trifunctional protein), alpha subunit /FL=gb:NM_000182.1 gb:U04627.1 gb:D16480.1
GGA2	214190_x_at	0.00186161	1.98632e-07	-1.25937	-0.332704	1.25937	down	-1.40109	-0.486545	1.40109	down	-1.5493	-0.631618	1.5493	down	1.65213	0.724329	1.65213	up	23062	Hs.460336	gb:AI799984 /DB_XREF=gi:5365456 /DB_XREF=wc46f12.x1 /CLONE=IMAGE:2321711 /FEA=EST /CNT=23 /TID=Hs.155546.4 /TIER=ConsEnd /STK=0 /UG=Hs.155546 /LL=23062 /UG_GENE=KIAA1080 /UG_TITLE=KIAA1080 protein; Golgi-associated, gamma-adaptin ear containing, ARF-binding protein 2
MCM3AP	215581_s_at	0.00186161	2.1894e-07	-1.09497	-0.130896	1.09497	down	1.2088	0.273577	1.2088	up	1.06785	0.0947097	1.06785	up	2.19004	1.13096	2.19004	up	8888	Hs.389037	gb:AK022303.1 /DB_XREF=gi:10433670 /FEA=mRNA /CNT=4 /TID=Hs.287503.0 /TIER=ConsEnd /STK=0 /UG=Hs.287503 /UG_TITLE=Homo sapiens cDNA FLJ12241 fis, clone MAMMA1001274 /DEF=Homo sapiens cDNA FLJ12241 fis, clone MAMMA1001274.
LIX1L	235036_at	0.00186161	2.3834e-07	1.09983	0.13728	1.09983	up	1.10832	0.148377	1.10832	up	1.32886	0.410185	1.32886	up	2.56327	1.35799	2.56327	up	128077	Hs.740619	gb:AA923372 /DB_XREF=gi:3070681 /DB_XREF=ol46e01.s1 /CLONE=IMAGE:1526520 /FEA=EST /CNT=26 /TID=Hs.135276.0 /TIER=ConsEnd /STK=3 /UG=Hs.135276 /UG_TITLE=ESTs
AGO4	1569408_at	0.00227353	3.32661e-07	-1.03065	-0.043553	1.03065	down	2.63126	1.39575	2.63126	up	-1.12167	-0.165649	1.12167	down	-1.12135	-0.165238	1.12135	down	192670	Hs.744858	gb:BC016012.1 /DB_XREF=gi:18677811 /TID=Hs2.397392.1 /CNT=4 /FEA=mRNA /TIER=ConsEnd /STK=0 /UG=Hs.397392 /UG_TITLE=Homo sapiens, clone IMAGE:4690259, mRNA /DEF=Homo sapiens, clone IMAGE:4690259, mRNA.
PPP3R1	204507_s_at	0.00261818	4.77783e-07	1.48355	0.569054	1.48355	up	2.79456	1.48262	2.79456	up	1.27578	0.351384	1.27578	up	3.72141	1.89585	3.72141	up	5534	Hs.280604	gb:NM_000945.1 /DB_XREF=gi:4506024 /GEN=PPP3R1 /FEA=FLmRNA /CNT=54 /TID=Hs.278540.0 /TIER=FL /STK=6 /UG=Hs.278540 /LL=5534 /DEF=Homo sapiens protein phosphatase 3 (formerly 2B), regulatory subunit B (19kD), alpha isoform (calcineurin B, type I) (PPP3R1), mRNA. /PROD=protein phosphatase 3 (formerly 2B), regulatorysubunit B (19kD), alpha isoform (calcineurin B, type I) /FL=gb:M30773.1 gb:NM_000945.1
UBE4B	215533_s_at	0.00261818	4.78863e-07	-1.114	-0.155755	1.114	down	1.91137	0.934608	1.91137	up	2.29374	1.1977	2.29374	up	2.65872	1.41073	2.65872	up	10277	Hs.593974	gb:AF091093.1 /DB_XREF=gi:3860023 /FEA=mRNA /CNT=5 /TID=Hs.24594.3 /TIER=ConsEnd /STK=0 /UG=Hs.24594 /LL=10277 /UG_GENE=UBE4B /DEF=Homo sapiens clone 686 unknown mRNA, complete sequence. /PROD=unknown
MAT2A	200769_s_at	0.0028461	5.72604e-07	1.00933	0.0134038	1.00933	up	1.27569	0.351283	1.27569	up	1.11029	0.150934	1.11029	up	3.2572	1.70363	3.2572	up	4144	Hs.516157	gb:NM_005911.1 /DB_XREF=gi:5174528 /GEN=MAT2A /FEA=FLmRNA /CNT=433 /TID=Hs.77502.0 /TIER=FL /STK=0 /UG=Hs.77502 /LL=4144 /DEF=Homo sapiens methionine adenosyltransferase II, alpha (MAT2A), mRNA. /PROD=methionine adenosyltransferase II, alpha /FL=gb:BC001686.1 gb:BC001854.1 gb:NM_005911.1
ZC3H15	201593_s_at	0.0029565	6.53394e-07	-1.19096	-0.25213	1.19096	down	-1.25308	-0.325478	1.25308	down	-2.39082	-1.25751	2.39082	down	-1.66212	-0.733025	1.66212	down	55854	Hs.741180	gb:AV716798 /DB_XREF=gi:10813950 /DB_XREF=AV716798 /CLONE=DCBAKB02 /FEA=FLmRNA /CNT=199 /TID=Hs.6375.0 /TIER=Stack /STK=9 /UG=Hs.6375 /LL=55854 /UG_GENE=HT010 /UG_TITLE=uncharacterized hypothalamus protein HT010 /FL=gb:AF220184.1 gb:NM_018471.1
PPTC7	225204_at	0.0029565	7.02964e-07	-1.25385	-0.326368	1.25385	down	1.23296	0.302131	1.23296	up	-1.80774	-0.85419	1.80774	down	-1.51259	-0.597023	1.51259	down	160760	Hs.13854	gb:AA521311 /DB_XREF=gi:2261854 /DB_XREF=aa79g11.s1 /CLONE=IMAGE:827204 /FEA=EST /CNT=107 /TID=Hs.13854.0 /TIER=Stack /STK=17 /UG=Hs.13854 /UG_TITLE=ESTs
CMTM4	225009_at	0.00315124	8.06902e-07	1.24581	0.317081	1.24581	up	7.00092	2.80754	7.00092	up	4.2378	2.08331	4.2378	up	3.01405	1.59171	3.01405	up	146223	Hs.643961	gb:AA191708 /DB_XREF=gi:1780388 /DB_XREF=zp82d10.s1 /CLONE=IMAGE:626707 /FEA=mRNA /CNT=138 /TID=Hs.325825.0 /TIER=Stack /STK=14 /UG=Hs.325825 /UG_TITLE=Homo sapiens cDNA FLJ20848 fis, clone ADKA01732
ASAP1	224796_at	0.00318255	9.58865e-07	1.25743	0.330478	1.25743	up	2.29211	1.19668	2.29211	up	2.04114	1.02938	2.04114	up	1.60449	0.682115	1.60449	up	50807	Hs.655552	gb:W03103 /DB_XREF=gi:1275081 /DB_XREF=za04b05.r1 /CLONE=IMAGE:291537 /FEA=mRNA /CNT=168 /TID=Hs.10669.1 /TIER=Stack /STK=53 /UG=Hs.10669 /LL=50807 /UG_GENE=KIAA1249 /UG_TITLE=KIAA1249 protein
PTPN11	205868_s_at	0.00318255	1.0138e-06	-1.2267	-0.29478	1.2267	down	-1.34951	-0.432439	1.34951	down	-1.38103	-0.465744	1.38103	down	1.50292	0.587768	1.50292	up	5781	Hs.506852	gb:L07527.1 /DB_XREF=gi:292406 /FEA=FLmRNA /CNT=25 /TID=Hs.22868.0 /TIER=FL /STK=1 /UG=Hs.22868 /LL=5781 /UG_GENE=PTPN11 /DEF=Homo sapiens protein-tyrosine phosphatase mRNA, complete cds. /PROD=protein-tyrosine phosphatase /FL=gb:L03535.1 gb:NM_002834.1 gb:D13540.1 gb:L07527.1
MBD1	1555611_s_at	0.00318255	1.09058e-06	1.02779	0.0395419	1.02779	up	-1.00601	-0.00864504	1.00601	down	1.04964	0.0698928	1.04964	up	1.8711	0.903883	1.8711	up	4152	Hs.405610	gb:BC012487.1 /DB_XREF=gi:15214705 /TID=Hs2Affx.1.387 /CNT=1 /FEA=FLmRNA /TIER=FL /STK=1 /NOTE=sequence(s) not in UniGene /DEF=Homo sapiens, clone MGC:21089 IMAGE:4509171, mRNA, complete cds. /PROD=Unknown (protein for MGC:21089) /FL=gb:BC012487.1
CALU	200755_s_at	0.00318255	1.36871e-06	1.17899	0.237555	1.17899	up	1.86411	0.898491	1.86411	up	1.86416	0.898523	1.86416	up	1.91658	0.938533	1.91658	up	813	Hs.743262	gb:BF939365 /DB_XREF=gi:12356685 /DB_XREF=nad87h04.x1 /CLONE=IMAGE:3410551 /FEA=FLmRNA /CNT=452 /TID=Hs.7753.0 /TIER=Stack /STK=19 /UG=Hs.7753 /LL=813 /UG_GENE=CALU /UG_TITLE=calumenin /FL=gb:AF013759.1 gb:U67280.1 gb:NM_001219.2
SLC35A2	207439_s_at	0.00318255	1.40354e-06	-1.04886	-0.0688216	1.04886	down	1.3898	0.474875	1.3898	up	1.43021	0.516227	1.43021	up	1.84374	0.882637	1.84374	up	7355	Hs.21899	gb:NM_005660.1 /DB_XREF=gi:5032210 /GEN=SLC35A2 /FEA=FLmRNA /CNT=5 /TID=Hs.21899.0 /TIER=FL /STK=2 /UG=Hs.21899 /LL=7355 /DEF=Homo sapiens solute carrier family 35 (UDP-galactose transporter), member 2 (SLC35A2), mRNA. /PROD=solute carrier family 35 (UDP-galactosetransporter), member 2 /FL=gb:D88146.1 gb:NM_005660.1
PTPRJ	227396_at	0.00318255	1.41665e-06	1.23795	0.307955	1.23795	up	2.91059	1.54131	2.91059	up	3.43925	1.78209	3.43925	up	2.9588	1.56501	2.9588	up	5795	Hs.318547	gb:AI631833 /DB_XREF=gi:4683163 /DB_XREF=wa36f12.x1 /CLONE=IMAGE:2300207 /FEA=EST /CNT=38 /TID=Hs.306163.0 /TIER=Stack /STK=26 /UG=Hs.306163 /LL=81502 /UG_GENE=LOC81502 /UG_TITLE=hypothetical protein AL110115
TAPBP	1555565_s_at	0.00318255	1.43274e-06	-1.11211	-0.153295	1.11211	down	1.17942	0.238077	1.17942	up	-1.11945	-0.162785	1.11945	down	2.88825	1.5302	2.88825	up	6892	Hs.370937	gb:AF314222.1 /DB_XREF=gi:11225590 /TID=Hs2.370937.6 /CNT=1 /FEA=FLmRNA /TIER=FL /STK=1 /LL=6892 /UG_GENE=TAPBP /UG=Hs.370937 /DEF=Homo sapiens tapasin mRNA, complete cds, alternatively spliced. /PROD=tapasin /FL=gb:AF314222.1
	237118_at	0.00318255	1.4403e-06	-1.21497	-0.280916	1.21497	down	3.80695	1.92863	3.80695	up	1.47957	0.565173	1.47957	up	1.42279	0.508721	1.42279	up			gb:AA057437 /DB_XREF=gi:1550078 /DB_XREF=zf57f11.s1 /CLONE=IMAGE:381069 /FEA=EST /CNT=7 /TID=Hs.63386.0 /TIER=ConsEnd /STK=7 /UG=Hs.63386 /UG_TITLE=ESTs
NEAT1	227062_at	0.00318255	1.46541e-06	-1.20684	-0.271229	1.20684	down	10.6456	3.41218	10.6456	up	2.68587	1.42539	2.68587	up	1.77822	0.830434	1.77822	up	283131	Hs.523789	gb:AU155361 /DB_XREF=gi:11016882 /DB_XREF=AU155361 /CLONE=OVARC1001752 /FEA=EST /CNT=32 /TID=Hs.79706.1 /TIER=Stack /STK=22 /UG=Hs.79706 /LL=5339 /UG_GENE=PLEC1 /UG_TITLE=plectin 1, intermediate filament binding protein, 500kD
DAPK3	203890_s_at	0.00318255	1.47569e-06	1.18467	0.244489	1.18467	up	-1.00462	-0.00665116	1.00462	down	1.44971	0.535759	1.44971	up	2.55464	1.35312	2.55464	up	1613	Hs.631844	gb:BF686824 /DB_XREF=gi:11972232 /DB_XREF=602140792F1 /CLONE=IMAGE:4301998 /FEA=FLmRNA /CNT=98 /TID=Hs.25619.0 /TIER=Stack /STK=29 /UG=Hs.25619 /LL=1613 /UG_GENE=DAPK3 /UG_TITLE=death-associated protein kinase 3 /FL=gb:AB007144.1 gb:AB022341.1 gb:NM_001348.1
PTPRJ	210173_at	0.00318255	1.50686e-06	-1.00036	-0.000515804	1.00036	down	1.13553	0.183368	1.13553	up	1.12203	0.16611	1.12203	up	3.72917	1.89885	3.72917	up	5795	Hs.318547	gb:D37781.1 /DB_XREF=gi:633072 /FEA=FLmRNA /CNT=16 /TID=Hs.171992.0 /TIER=FL /STK=1 /UG=Hs.171992 /LL=5795 /UG_GENE=PTPRJ /DEF=Human mRNA for protein-tyrosine phosphatase HPTPeta, complete cds. /PROD=protein-tyrosine phosphatase /FL=gb:U10886.1 gb:D37781.1 gb:NM_002843.1
ASAP1	221039_s_at	0.00318255	1.51342e-06	1.3438	0.42632	1.3438	up	2.73199	1.44995	2.73199	up	2.52212	1.33463	2.52212	up	2.08707	1.06148	2.08707	up	50807	Hs.655552	gb:NM_018482.1 /DB_XREF=gi:8923867 /GEN=KIAA1249 /FEA=FLmRNA /CNT=2 /TID=Hs.10669.0 /TIER=FL /STK=0 /UG=Hs.10669 /LL=50807 /DEF=Homo sapiens KIAA1249 protein (KIAA1249), mRNA. /PROD=uncharacterized gastric protein ZG14P /FL=gb:AF222859.1 gb:NM_018482.1
EBP	202735_at	0.00344083	1.71669e-06	1.08316	0.115252	1.08316	up	-1.45101	-0.537054	1.45101	down	-1.17274	-0.229885	1.17274	down	-1.36731	-0.451338	1.36731	down	10682	Hs.30619	gb:NM_006579.1 /DB_XREF=gi:5729809 /GEN=EBP /FEA=FLmRNA /CNT=125 /TID=Hs.75105.0 /TIER=FL+Stack /STK=45 /UG=Hs.75105 /LL=10682 /DEF=Homo sapiens emopamil-binding protein (sterol isomerase) (EBP), mRNA. /PROD=emopamil-binding protein (sterol isomerase) /FL=gb:NM_006579.1
RREB1	215620_at	0.00344083	1.76211e-06	-1.16704	-0.222858	1.16704	down	1.98078	0.986068	1.98078	up	-1.09177	-0.126663	1.09177	down	1.15958	0.213597	1.15958	up	6239		gb:AU147182 /DB_XREF=gi:11008703 /DB_XREF=AU147182 /CLONE=HEMBB1002623 /FEA=mRNA /CNT=4 /TID=Hs.301197.0 /TIER=ConsEnd /STK=1 /UG=Hs.301197 /UG_TITLE=Homo sapiens cDNA FLJ12098 fis, clone HEMBB1002623
STYX	244030_at	0.003594	2.0276e-06	-1.15578	-0.20887	1.15578	down	1.43686	0.522921	1.43686	up	1.39236	0.477534	1.39236	up	3.2068	1.68113	3.2068	up	6815	Hs.364980	gb:BG390493 /DB_XREF=gi:13283941 /DB_XREF=602416146F1 /CLONE=IMAGE:4524442 /FEA=EST /CNT=7 /TID=Hs.224818.0 /TIER=ConsEnd /STK=0 /UG=Hs.224818 /UG_TITLE=ESTs
WDR1	210935_s_at	0.003594	2.08752e-06	-1.19558	-0.257705	1.19558	down	1.4375	0.523567	1.4375	up	-1.05641	-0.0791667	1.05641	down	2.99244	1.58132	2.99244	up	9948	Hs.128548	gb:AF274954.1 /DB_XREF=gi:12751070 /FEA=FLmRNA /CNT=2 /TID=Hs.326791.0 /TIER=FL /STK=0 /UG=Hs.326791 /DEF=Homo sapiens PNAS-29 mRNA, complete cds. /PROD=PNAS-29 /FL=gb:AF274954.1
UBE4B	202317_s_at	0.003594	2.12912e-06	1.13887	0.187605	1.13887	up	1.57704	0.657223	1.57704	up	1.75414	0.810766	1.75414	up	1.50178	0.586671	1.50178	up	10277	Hs.593974	gb:NM_006048.1 /DB_XREF=gi:5174482 /GEN=UBE4B /FEA=FLmRNA /CNT=190 /TID=Hs.24594.0 /TIER=FL /STK=0 /UG=Hs.24594 /LL=10277 /DEF=Homo sapiens ubiquitination factor E4B (homologous to yeast UFD2) (UBE4B), mRNA. /PROD=ubiquitination factor E4B (homologous to yeastUFD2) /FL=gb:AF043117.1 gb:NM_006048.1
GPAA1	201618_x_at	0.003594	2.21026e-06	-1.02359	-0.0336435	1.02359	down	1.46628	0.552162	1.46628	up	1.59489	0.673457	1.59489	up	1.87054	0.903452	1.87054	up	8733	Hs.627962	gb:NM_003801.2 /DB_XREF=gi:6031166 /GEN=GPAA1 /FEA=FLmRNA /CNT=254 /TID=Hs.4742.0 /TIER=FL+Stack /STK=89 /UG=Hs.4742 /LL=8733 /DEF=Homo sapiens anchor attachment protein 1 (Gaa1p, yeast) homolog (GPAA1), mRNA. /PROD=anchor attachment protein 1 /FL=gb:NM_003801.2 gb:AB002135.1 gb:AB006969.1 gb:BC004129.1 gb:BC003171.1
KIAA0930	227144_at	0.003594	2.22786e-06	1.15672	0.210035	1.15672	up	2.86425	1.51815	2.86425	up	2.85235	1.51215	2.85235	up	3.04421	1.60607	3.04421	up	23313	Hs.592207	gb:AA476916 /DB_XREF=gi:2205127 /DB_XREF=zu38b08.s1 /CLONE=IMAGE:740247 /FEA=EST /CNT=40 /TID=Hs.293361.0 /TIER=Stack /STK=19 /UG=Hs.293361 /UG_TITLE=ESTs
GNB1	200745_s_at	0.003594	2.23495e-06	-1.14134	-0.190727	1.14134	down	1.44201	0.528081	1.44201	up	-1.22095	-0.288002	1.22095	down	1.08503	0.117739	1.08503	up	2782	Hs.430425	gb:AF070603.1 /DB_XREF=gi:3387983 /FEA=FLmRNA /CNT=478 /TID=Hs.215595.0 /TIER=Stack /STK=62 /UG=Hs.215595 /LL=2782 /UG_GENE=GNB1 /DEF=Homo sapiens clone 24584 beta-subunit signal transducing proteins GSGI mRNA, partial cds. /PROD=beta-subunit signal transducing proteins GSGI /FL=gb:NM_002074.1 gb:BC004186.1
	234326_at	0.00363057	2.3241e-06	-1.7881	-0.838429	1.7881	down	-1.77995	-0.83184	1.77995	down	-5.06399	-2.34027	5.06399	down	-4.22611	-2.07933	4.22611	down		Hs.677289	gb:AK024901.1 /DB_XREF=gi:10437315 /FEA=mRNA /CNT=1 /TID=Hs.190327.0 /TIER=ConsEnd /STK=0 /UG=Hs.190327 /UG_TITLE=Homo sapiens cDNA: FLJ21248 fis, clone COL01235 /DEF=Homo sapiens cDNA: FLJ21248 fis, clone COL01235.
HIPK3	207764_s_at	0.00373898	2.46188e-06	-1.00261	-0.00375906	1.00261	down	1.51625	0.600504	1.51625	up	1.09582	0.132006	1.09582	up	3.385	1.75915	3.385	up	10114	Hs.201918	gb:NM_005734.1 /DB_XREF=gi:11386208 /GEN=HIPK3 /FEA=FLmRNA /CNT=4 /TID=Hs.30148.0 /TIER=FL /STK=0 /UG=Hs.30148 /LL=10114 /DEF=Homo sapiens homeodomain-interacting protein kinase 3 (HIPK3), mRNA. /PROD=homeodomain-interacting protein kinase 3 /FL=gb:AF004849.1 gb:NM_005734.1
MBNL1	1555594_a_at	0.00378811	2.64067e-06	-1.65252	-0.724668	1.65252	down	-1.05488	-0.0770742	1.05488	down	-3.07615	-1.62113	3.07615	down	1.88123	0.91168	1.88123	up	4154	Hs.201858	gb:AF401998.1 /DB_XREF=gi:15290632 /GEN=MBNL /TID=Hs2.28578.3 /CNT=1 /FEA=FLmRNA /TIER=FL /STK=1 /LL=4154 /UG=Hs.28578 /DEF=Homo sapiens muscleblind 41kD isoform (MBNL) mRNA, complete cds. /PROD=muscleblind 41kD isoform /FL=gb:AF401998.1
GDI2	200008_s_at	0.00378811	2.7759e-06	-1.09041	-0.12487	1.09041	down	1.54742	0.629864	1.54742	up	1.65933	0.730604	1.65933	up	2.11558	1.08105	2.11558	up	2665	Hs.299055	gb:D13988.1 /DB_XREF=gi:285974 /FEA=FLmRNA /CNT=485 /TID=Hs.56845.0 /TIER=FL /STK=1 /UG=Hs.56845 /LL=2665 /UG_GENE=GDI2 /DEF=Human rab GDI mRNA, complete cds. /PROD=human rab GDI /FL=gb:D13988.1 gb:NM_001494.2 gb:BC005145.1
FKBP15	1568717_a_at	0.00378811	2.88652e-06	-1.09014	-0.124513	1.09014	down	1.46869	0.554529	1.46869	up	1.01233	0.0176832	1.01233	up	-1.03847	-0.0544648	1.03847	down	23307	Hs.522351	gb:BC009609.1 /DB_XREF=gi:16307064 /TID=Hs2.149395.1 /CNT=9 /FEA=mRNA /TIER=ConsEnd /STK=2 /UG=Hs.149395 /UG_TITLE=Homo sapiens, clone IMAGE:4294322, mRNA /DEF=Homo sapiens, clone IMAGE:4294322, mRNA.
UBE3B	212404_s_at	0.00378811	2.97119e-06	-1.0458	-0.0646015	1.0458	down	1.18436	0.24411	1.18436	up	1.32627	0.407373	1.32627	up	1.96159	0.972021	1.96159	up	89910	Hs.374067	gb:AL096740.1 /DB_XREF=gi:5419896 /FEA=mRNA /CNT=147 /TID=Hs.17639.1 /TIER=Stack /STK=21 /UG=Hs.17639 /UG_TITLE=Homo sapiens ubiquitin protein ligase (UBE3B) mRNA, partial cds /DEF=Homo sapiens mRNA; cDNA DKFZp586K2123 (from clone DKFZp586K2123).
ELP2	235623_at	0.00378811	3.004e-06	-1.18167	-0.24083	1.18167	down	1.13536	0.18315	1.13536	up	-1.13512	-0.182848	1.13512	down	-1.45114	-0.537183	1.45114	down	55250		gb:BF526230 /DB_XREF=gi:11613593 /DB_XREF=602071257F1 /CLONE=IMAGE:4213935 /FEA=EST /CNT=10 /TID=Hs.144758.0 /TIER=ConsEnd /STK=0 /UG=Hs.144758 /UG_TITLE=ESTs
HGSNAT	218017_s_at	0.00378811	3.04089e-06	1.08584	0.11881	1.08584	up	1.77179	0.82521	1.77179	up	1.98778	0.991156	1.98778	up	1.92472	0.944651	1.92472	up	138050	Hs.600384	gb:NM_025070.1 /DB_XREF=gi:13376612 /GEN=FLJ22242 /FEA=FLmRNA /CNT=136 /TID=Hs.288057.0 /TIER=FL+Stack /STK=30 /UG=Hs.288057 /LL=80140 /DEF=Homo sapiens hypothetical protein FLJ22242 (FLJ22242), mRNA. /PROD=hypothetical protein FLJ22242 /FL=gb:NM_025070.1
TMEM259	212575_at	0.00378811	3.06157e-06	-1.00667	-0.00959773	1.00667	down	1.0333	0.0472576	1.0333	up	-1.22887	-0.297334	1.22887	down	2.37608	1.24858	2.37608	up	91304	Hs.515003	gb:BF966155 /DB_XREF=gi:12333370 /DB_XREF=602286439F1 /CLONE=IMAGE:4375473 /FEA=DNA_2 /CNT=185 /TID=Hs.280666.1 /TIER=Stack /STK=82 /UG=Hs.280666 /UG_TITLE=Homo sapiens chromosome 19, cosmid R32184
LINC00657	1558028_x_at	0.00378811	3.07851e-06	1.0367	0.0520015	1.0367	up	3.30747	1.72573	3.30747	up	1.45043	0.536482	1.45043	up	3.59873	1.84749	3.59873	up	647979	Hs.743232	gb:BI857154 /DB_XREF=gi:15997901 /DB_XREF=603383750F1 /CLONE=IMAGE:5392477 /TID=Hs2.401218.1 /CNT=28 /FEA=mRNA /TIER=ConsEnd /STK=0 /UG=Hs.401218 /UG_TITLE=Homo sapiens mRNA; cDNA DKFZp566E0124 (from clone DKFZp566E0124)
DNAJB6	209015_s_at	0.00378811	3.11779e-06	1.11772	0.160564	1.11772	up	2.06186	1.04394	2.06186	up	1.79581	0.844632	1.79581	up	2.51715	1.33179	2.51715	up	10049	Hs.490745	gb:BC002446.1 /DB_XREF=gi:12803262 /FEA=FLmRNA /CNT=169 /TID=Hs.181195.0 /TIER=FL+Stack /STK=81 /UG=Hs.181195 /LL=10049 /UG_GENE=DNAJB6 /DEF=Homo sapiens, MRJ gene for a member of the DNAJ protein family, clone MGC:1152, mRNA, complete cds. /PROD=MRJ gene for a member of the DNAJ proteinfamily /FL=gb:AB015798.1 gb:BC002446.1
CDK2	211804_s_at	0.00398686	3.4246e-06	1.17807	0.236422	1.17807	up	1.12861	0.174542	1.12861	up	1.20976	0.274726	1.20976	up	1.97319	0.98053	1.97319	up	1017	Hs.19192	gb:AB012305.1 /DB_XREF=gi:3551190 /GEN=CDK2deltaT /FEA=FLmRNA /CNT=2 /TID=Hs.19192.1 /TIER=FL /STK=0 /UG=Hs.19192 /LL=1017 /DEF=Homo sapiens mRNA for d-HSCDK2, complete cds. /PROD=d-HSCDK2 /FL=gb:AB012305.1
NEAT1	234989_at	0.00398686	3.42721e-06	-1.25393	-0.326461	1.25393	down	6.76761	2.75865	6.76761	up	4.58999	2.19849	4.58999	up	3.24289	1.69728	3.24289	up	283131	Hs.523789	gb:AV699657 /DB_XREF=gi:10301628 /DB_XREF=AV699657 /CLONE=GKCEOD05 /FEA=EST /CNT=34 /TID=Hs.250594.0 /TIER=ConsEnd /STK=5 /UG=Hs.250594 /UG_TITLE=ESTs, Weakly similar to 1207289A reverse transcriptase related protein (H.sapiens)
MBTPS1	217543_s_at	0.00450094	4.03241e-06	1.04929	0.0694198	1.04929	up	-1.04194	-0.0592675	1.04194	down	1.12464	0.169459	1.12464	up	1.39277	0.477961	1.39277	up	8720	Hs.75890	gb:BE890314 /DB_XREF=gi:10348509 /DB_XREF=601431767F1 /CLONE=IMAGE:3916816 /FEA=EST /CNT=8 /TID=Hs.314499.0 /TIER=ConsEnd /STK=0 /UG=Hs.314499 /UG_TITLE=ESTs, Moderately similar to T43492 hypothetical protein DKFZp434A219.1 (H.sapiens)
PRPF6	208879_x_at	0.00450094	4.03376e-06	-1.24761	-0.319173	1.24761	down	-1.13278	-0.179864	1.13278	down	-1.07673	-0.10666	1.07673	down	1.58991	0.668945	1.58991	up	24148	Hs.31334	gb:BG469030 /DB_XREF=gi:13401215 /DB_XREF=602510773F1 /CLONE=IMAGE:4644787 /FEA=FLmRNA /CNT=251 /TID=Hs.31334.0 /TIER=Stack /STK=8 /UG=Hs.31334 /LL=24148 /UG_GENE=TOM /UG_TITLE=putative mitochondrial outer membrane protein import receptor /FL=gb:AB019219.1 gb:NM_012469.1 gb:AF026031.1 gb:BC001666.1 gb:AF221842.1
LRP8	208433_s_at	0.00464798	4.25056e-06	1.28835	0.365527	1.28835	up	2.26913	1.18214	2.26913	up	1.39459	0.479837	1.39459	up	1.08692	0.120249	1.08692	up	7804	Hs.280387	gb:NM_017522.1 /DB_XREF=gi:8923799 /GEN=HSZ75190 /FEA=FLmRNA /CNT=2 /TID=Hs.54481.1 /TIER=FL /STK=0 /UG=Hs.54481 /LL=7804 /DEF=Homo sapiens apolipoprotein E receptor 2 (HSZ75190), mRNA. /PROD=apolipoprotein E receptor 2 /FL=gb:NM_017522.1
UBE4B	202316_x_at	0.00471301	4.39623e-06	1.03218	0.0456978	1.03218	up	2.19603	1.1349	2.19603	up	2.85044	1.51118	2.85044	up	3.23289	1.69282	3.23289	up	10277	Hs.593974	gb:AW241715 /DB_XREF=gi:6575469 /DB_XREF=xn74b08.x1 /CLONE=IMAGE:2700183 /FEA=FLmRNA /CNT=190 /TID=Hs.24594.0 /TIER=Stack /STK=47 /UG=Hs.24594 /LL=10277 /UG_GENE=UBE4B /UG_TITLE=ubiquitination factor E4B (homologous to yeast UFD2) /FL=gb:AF043117.1 gb:NM_006048.1
WWP2	1552737_s_at	0.00473144	4.50467e-06	1.29934	0.377778	1.29934	up	2.07697	1.05448	2.07697	up	1.53997	0.622904	1.53997	up	2.82991	1.50076	2.82991	up	11060	Hs.408458	gb:NM_007014.2 /DB_XREF=gi:8400741 /GEN=WWP2 /TID=Hs2.333382.1 /CNT=8 /FEA=FLmRNA /TIER=FL /STK=2 /LL=11060 /UG=Hs.333382 /DEF=Homo sapiens Nedd-4-like ubiquitin-protein ligase (WWP2), mRNA. /PROD=Nedd-4-like ubiquitin-protein ligase /FL=gb:U96114.1 gb:NM_007014.2
	243350_at	0.00473144	4.66121e-06	-1.26049	-0.333986	1.26049	down	1.3885	0.473526	1.3885	up	-1.26374	-0.337696	1.26374	down	-1.81436	-0.859458	1.81436	down		Hs.665827	gb:BE675229 /DB_XREF=gi:10035770 /DB_XREF=7f05a03.x1 /CLONE=IMAGE:3293740 /FEA=EST /CNT=4 /TID=Hs.275804.0 /TIER=ConsEnd /STK=3 /UG=Hs.275804 /UG_TITLE=ESTs
B4GALT1	216627_s_at	0.00473144	4.67302e-06	1.21114	0.276363	1.21114	up	-1.02182	-0.0311439	1.02182	down	-1.04992	-0.0702749	1.04992	down	3.5842	1.84165	3.5842	up	2683	Hs.272011	gb:U10473.1 /DB_XREF=gi:500809 /FEA=mRNA /CNT=1 /TID=Hs.198248.3 /TIER=ConsEnd /STK=0 /UG=Hs.198248 /LL=2683 /UG_GENE=B4GALT1 /DEF=Human clone p4betaGT3 beta-1,4-galactosyltransferase mRNA, partial cds. /PROD=beta-1,4-galactosyltransferase
	241415_at	0.0048875	4.91655e-06	-1.25067	-0.322701	1.25067	down	1.61525	0.69176	1.61525	up	1.28541	0.362233	1.28541	up	-1.29171	-0.36928	1.29171	down			gb:BF509725 /DB_XREF=gi:11593023 /DB_XREF=UI-H-BI4-apg-a-01-0-UI.s1 /CLONE=IMAGE:3087240 /FEA=EST /CNT=6 /TID=Hs.283563.0 /TIER=ConsEnd /STK=4 /UG=Hs.283563 /UG_TITLE=ESTs
COLGALT1	222644_s_at	0.00497863	5.09928e-06	-1.00969	-0.0139192	1.00969	down	2.02125	1.01525	2.02125	up	1.31266	0.392494	1.31266	up	3.17787	1.66806	3.17787	up	79709	Hs.418795	gb:AI924150 /DB_XREF=gi:5660114 /DB_XREF=wn64c01.x1 /CLONE=IMAGE:2450208 /FEA=FLmRNA /CNT=88 /TID=Hs.61478.0 /TIER=Stack /STK=10 /UG=Hs.61478 /LL=79709 /UG_GENE=FLJ22329 /UG_TITLE=hypothetical protein FLJ22329 /FL=gb:NM_024656.1
AHNAK	235281_x_at	0.00511018	5.41358e-06	-1.08304	-0.115091	1.08304	down	-1.02125	-0.0303321	1.02125	down	1.03957	0.0559891	1.03957	up	5.53286	2.46803	5.53286	up	79026	Hs.502756	gb:AA523289 /DB_XREF=gi:2264001 /DB_XREF=ni40g08.s1 /CLONE=IMAGE:979358 /FEA=EST /CNT=12 /TID=Hs.325279.0 /TIER=ConsEnd /STK=0 /UG=Hs.325279 /UG_TITLE=ESTs, Moderately similar to S47271 AHNAK-related protein (H.sapiens)
HIPK3	210148_at	0.00511018	5.5457e-06	-1.01237	-0.017732	1.01237	down	2.65474	1.40857	2.65474	up	2.20172	1.13863	2.20172	up	7.06071	2.81981	7.06071	up	10114	Hs.201918	gb:AF305239.1 /DB_XREF=gi:10998781 /GEN=FIST3 /FEA=FLmRNA /CNT=16 /TID=Hs.30148.1 /TIER=FL /STK=0 /UG=Hs.30148 /LL=10114 /DEF=Homo sapiens Fas-interacting serinethreonine kinase 3 (FIST3) mRNA, complete cds. /PROD=Fas-interacting serinethreonine kinase 3 /FL=gb:AF305239.1
GPAA1	211060_x_at	0.00511018	5.56292e-06	1.06328	0.0885169	1.06328	up	1.37432	0.458714	1.37432	up	1.5882	0.667396	1.5882	up	1.74624	0.804248	1.74624	up	8733	Hs.627962	gb:BC006383.1 /DB_XREF=gi:13623546 /FEA=FLmRNA /CNT=1 /TID=HsAffx.901045.331 /TIER=FL /STK=0 /DEF=Homo sapiens, clone MGC:12663, mRNA, complete cds. /PROD=Unknown (protein for MGC:12663) /FL=gb:BC006383.1
	1561828_at	0.00511018	5.67837e-06	-1.12602	-0.171236	1.12602	down	1.03506	0.0497151	1.03506	up	-1.03508	-0.0497482	1.03508	down	-1.00494	-0.00711002	1.00494	down		Hs.698515	gb:BC043164.1 /DB_XREF=gi:27693796 /TID=Hs2.435993.1 /CNT=6 /FEA=mRNA /TIER=ConsEnd /STK=0 /UG=Hs.435993 /UG_TITLE=Homo sapiens, clone IMAGE:5286816, mRNA /DEF=Homo sapiens, clone IMAGE:5286816, mRNA.
PRRC2C	211944_at	0.00511018	5.70134e-06	-1.25251	-0.324819	1.25251	down	-1.05314	-0.0747018	1.05314	down	-2.63402	-1.39727	2.63402	down	-2.12047	-1.08438	2.12047	down	23215	Hs.494614	gb:BE729523 /DB_XREF=gi:10143515 /DB_XREF=601564896F1 /CLONE=IMAGE:3926279 /FEA=mRNA /CNT=400 /TID=Hs.69559.2 /TIER=Stack /STK=20 /UG=Hs.69559 /LL=23215 /UG_GENE=KIAA1096 /UG_TITLE=KIAA1096 protein
ARPC4///ARPC4-TTLL3	211672_s_at	0.00518608	5.92296e-06	-1.16114	-0.215546	1.16114	down	2.41551	1.27233	2.41551	up	1.59087	0.669817	1.59087	up	4.48807	2.16609	4.48807	up	10093///100526693	Hs.323342	gb:AF019888.1 /DB_XREF=gi:2444286 /GEN=ARC20 /FEA=FLmRNA /CNT=1 /TID=HsAffx.900461.772 /TIER=FL /STK=0 /DEF=Homo sapiens Arp23 complex 20 kDa subunit (ARC20) mRNA, complete cds. /PROD=Arp23 complex 20 kDa subunit /FL=gb:AF019888.1
PHC3	1552644_a_at	0.00518608	6.04934e-06	1.38289	0.467688	1.38289	up	-2.98584	-1.57814	2.98584	down	-2.41863	-1.27419	2.41863	down	-2.04395	-1.03136	2.04395	down	80012	Hs.529592	gb:NM_024947.2 /DB_XREF=gi:21359977 /GEN=PHC3 /TID=Hs2.231977.1 /CNT=27 /FEA=FLmRNA /TIER=FL /STK=2 /LL=80012 /UG=Hs.231977 /DEF=Homo sapiens polyhomeotic like 3 (Drosophila) (PHC3), mRNA. /PROD=polyhomeotic like 3 /FL=gb:AF380154.1 gb:NM_024947.2
ATG16L2	229389_at	0.00518608	6.08913e-06	1.17459	0.232162	1.17459	up	5.12918	2.35873	5.12918	up	1.88527	0.914771	1.88527	up	1.29888	0.377268	1.29888	up	89849	Hs.653186	gb:AA741058 /DB_XREF=gi:2779650 /DB_XREF=nz04c04.s1 /CLONE=IMAGE:1286790 /FEA=EST /CNT=17 /TID=Hs.20065.0 /TIER=Stack /STK=10 /UG=Hs.20065 /UG_TITLE=ESTs
EXOSC9	205061_s_at	0.00518608	6.25264e-06	1.04789	0.0674909	1.04789	up	-2.22965	-1.15682	2.22965	down	-1.21083	-0.275998	1.21083	down	-1.41136	-0.497084	1.41136	down	5393	Hs.91728	gb:NM_005033.1 /DB_XREF=gi:4826921 /GEN=PMSCL1 /FEA=FLmRNA /CNT=49 /TID=Hs.91728.0 /TIER=FL+Stack /STK=18 /UG=Hs.91728 /LL=5393 /DEF=Homo sapiens polymyositisscleroderma autoantigen 1 (75kD) (PMSCL1), mRNA. /PROD=polymyositisscleroderma autoantigen 1 (75kD) /FL=gb:M58460.1 gb:NM_005033.1
GDI2	200009_at	0.00518608	6.26029e-06	1.03167	0.0449823	1.03167	up	1.47705	0.562718	1.47705	up	1.64854	0.721189	1.64854	up	1.44307	0.529137	1.44307	up	2665	Hs.299055	gb:NM_001494.2 /DB_XREF=gi:6598322 /GEN=GDI2 /FEA=FLmRNA /CNT=485 /TID=Hs.56845.0 /TIER=FL+Stack /STK=159 /UG=Hs.56845 /LL=2665 /DEF=Homo sapiens GDP dissociation inhibitor 2 (GDI2), mRNA. /PROD=GDP dissociation inhibitor 2 /FL=gb:D13988.1 gb:NM_001494.2 gb:BC005145.1
AGO1///AGO3	228120_at	0.00521805	6.4496e-06	1.27519	0.350716	1.27519	up	1.69886	0.764567	1.69886	up	2.67646	1.42032	2.67646	up	1.9485	0.96236	1.9485	up	26523///192669	Hs.22867///Hs.656677	gb:AW136032 /DB_XREF=gi:6140165 /DB_XREF=UI-H-BI1-adn-f-09-0-UI.s1 /CLONE=IMAGE:2717345 /FEA=mRNA /CNT=33 /TID=Hs.22867.0 /TIER=Stack /STK=23 /UG=Hs.22867 /UG_TITLE=Homo sapiens cDNA: FLJ22073 fis, clone HEP11868
EFTUD2	222398_s_at	0.00521805	6.48976e-06	1.14849	0.199739	1.14849	up	1.38955	0.474619	1.38955	up	1.56902	0.649863	1.56902	up	1.44083	0.526901	1.44083	up	9343	Hs.151787	gb:BC002360.1 /DB_XREF=gi:12803112 /FEA=FLmRNA /CNT=357 /TID=Hs.151787.0 /TIER=FL+Stack /STK=80 /UG=Hs.151787 /LL=9343 /UG_GENE=U5-116KD /DEF=Homo sapiens, U5 snRNP-specific protein, 116 kD, clone MGC:8581, mRNA, complete cds. /PROD=U5 snRNP-specific protein, 116 kD /FL=gb:D21163.1 gb:NM_004247.1 gb:BC002360.1
	237318_at	0.0052369	6.60898e-06	-1.01078	-0.0154655	1.01078	down	1.94195	0.957503	1.94195	up	1.67882	0.747451	1.67882	up	-1.24943	-0.321267	1.24943	down		Hs.664628	gb:AA677952 /DB_XREF=gi:2658474 /DB_XREF=zi14a06.s1 /CLONE=IMAGE:430738 /FEA=EST /CNT=6 /TID=Hs.120891.0 /TIER=ConsEnd /STK=5 /UG=Hs.120891 /UG_TITLE=ESTs
AHCYL1	200850_s_at	0.00527493	6.75345e-06	1.22411	0.291733	1.22411	up	1.73605	0.795812	1.73605	up	1.73998	0.799067	1.73998	up	1.45356	0.53959	1.45356	up	10768	Hs.743973	gb:NM_006621.1 /DB_XREF=gi:5729723 /GEN=AHCYL1 /FEA=FLmRNA /CNT=358 /TID=Hs.4113.0 /TIER=FL+Stack /STK=95 /UG=Hs.4113 /LL=10768 /DEF=Homo sapiens S-adenosylhomocysteine hydrolase-like 1 (AHCYL1), mRNA. /PROD=S-adenosylhomocysteine hydrolase-like 1 /FL=gb:U82761.1 gb:NM_006621.1
GOLGA1	203383_s_at	0.00530999	6.98507e-06	1.20517	0.269234	1.20517	up	1.48003	0.565631	1.48003	up	1.69401	0.760447	1.69401	up	1.51614	0.600405	1.51614	up	2800	Hs.133469	gb:BG111661 /DB_XREF=gi:12605167 /DB_XREF=602285419F1 /CLONE=IMAGE:4372612 /FEA=FLmRNA /CNT=105 /TID=Hs.172647.0 /TIER=Stack /STK=14 /UG=Hs.172647 /LL=2800 /UG_GENE=GOLGA1 /UG_TITLE=golgi autoantigen, golgin subfamily a, 1 /FL=gb:NM_002077.1 gb:U51587.1
	1560474_at	0.00530999	6.99258e-06	-1.17013	-0.226675	1.17013	down	1.46287	0.548802	1.46287	up	-1.23218	-0.301214	1.23218	down	-1.16535	-0.22076	1.16535	down		Hs.680634	gb:BM728509 /DB_XREF=gi:19049842 /DB_XREF=UI-E-EJ0-aiu-i-14-0-UI.r1 /CLONE=UI-E-EJ0-aiu-i-14-0-UI /TID=Hs2.350953.1 /CNT=3 /FEA=mRNA /TIER=ConsEnd /STK=0 /UG=Hs.350953 /UG_TITLE=Homo sapiens, clone IMAGE:4294221, mRNA
NDRG3	221082_s_at	0.00547712	7.31284e-06	-1.01624	-0.0232406	1.01624	down	1.45553	0.541548	1.45553	up	1.48121	0.56678	1.48121	up	2.39798	1.26182	2.39798	up	57446	Hs.437338	gb:NM_022477.1 /DB_XREF=gi:11968028 /GEN=FLJ13556 /FEA=FLmRNA /CNT=2 /TID=Hs.240615.0 /TIER=FL /STK=0 /UG=Hs.240615 /LL=64401 /DEF=Homo sapiens hypothetical protein FLJ13556 similar to N-myc downstream regulated 3 (FLJ13556), mRNA. /PROD=hypothetical protein FLJ13556 similar to N-mycdownstream regulated 3 /FL=gb:NM_022477.1
NOL7	202882_x_at	0.00560034	7.73442e-06	1.0766	0.106487	1.0766	up	-1.80866	-0.854922	1.80866	down	-1.65197	-0.724187	1.65197	down	-1.63881	-0.71265	1.63881	down	51406	Hs.306242	gb:NM_016167.2 /DB_XREF=gi:13569842 /GEN=RARG-1 /FEA=FLmRNA /CNT=141 /TID=Hs.106346.0 /TIER=FL /STK=3 /UG=Hs.106346 /LL=51406 /DEF=Homo sapiens retinoic acid repressible protein (RARG-1), mRNA. /PROD=retinoic acid repressible protein /FL=gb:NM_016167.2 gb:AF172066.2
HADHA	208631_s_at	0.00560034	7.85889e-06	1.12473	0.169573	1.12473	up	1.81896	0.863116	1.81896	up	1.89963	0.925719	1.89963	up	2.03184	1.02279	2.03184	up	3030	Hs.516032	gb:U04627.1 /DB_XREF=gi:595266 /FEA=FLmRNA /CNT=488 /TID=Hs.75860.0 /TIER=FL /STK=1 /UG=Hs.75860 /LL=3030 /UG_GENE=HADHA /DEF=Human 78 kDa gastrin-binding protein mRNA, complete cds. /PROD=78 kDa gastrin-binding protein /FL=gb:NM_000182.1 gb:U04627.1 gb:D16480.1
GPAA1	215690_x_at	0.00560034	7.86457e-06	1.07506	0.104414	1.07506	up	1.38135	0.466075	1.38135	up	1.57222	0.652801	1.57222	up	1.65971	0.730935	1.65971	up	8733	Hs.627962	gb:AL157437.1 /DB_XREF=gi:7018511 /GEN=DKFZp434E1512 /FEA=mRNA /CNT=3 /TID=Hs.4742.1 /TIER=ConsEnd /STK=0 /UG=Hs.4742 /LL=8733 /DEF=Homo sapiens mRNA; cDNA DKFZp434E1512 (from clone DKFZp434E1512); partial cds. /PROD=hypothetical protein
LTA4H	208771_s_at	0.00560034	7.88709e-06	1.44376	0.529827	1.44376	up	3.42356	1.7755	3.42356	up	3.07242	1.61938	3.07242	up	3.757	1.90958	3.757	up	4048	Hs.524648	gb:J02959.1 /DB_XREF=gi:187174 /FEA=FLmRNA /CNT=302 /TID=Hs.81118.0 /TIER=FL /STK=1 /UG=Hs.81118 /LL=4048 /UG_GENE=LTA4H /UG_TITLE=leukotriene A4 hydrolase /DEF=Human leukotriene A-4 hydrolase mRNA, complete cds. /FL=gb:NM_000895.1 gb:J02959.1 gb:J03459.1
ADAM8	205179_s_at	0.00565165	8.0627e-06	-1.08176	-0.113384	1.08176	down	1.56387	0.645123	1.56387	up	1.27338	0.348664	1.27338	up	3.14898	1.65488	3.14898	up	101	Hs.501574	gb:AI814527 /DB_XREF=gi:5425742 /DB_XREF=wj74c02.x1 /CLONE=IMAGE:2408546 /FEA=FLmRNA /CNT=47 /TID=Hs.86947.0 /TIER=Stack /STK=10 /UG=Hs.86947 /LL=101 /UG_GENE=ADAM8 /UG_TITLE=a disintegrin and metalloproteinase domain 8 /FL=gb:D26579.1 gb:NM_001109.1
RAD51L3-RFFL///RFFL	1562603_at	0.00568938	8.29128e-06	1.08639	0.119536	1.08639	up	1.27045	0.345338	1.27045	up	1.20167	0.265038	1.20167	up	1.90988	0.933485	1.90988	up	117584///100529207	Hs.13680	gb:BG330374 /DB_XREF=gi:13136812 /DB_XREF=602430521F1 /CLONE=IMAGE:4548196 /TID=Hs2.172694.4 /CNT=2 /FEA=mRNA /TIER=ConsEnd /STK=0 /LL=117584 /UG_GENE=LOC117584 /UG=Hs.172694 /UG_TITLE=fring
HDLBP	221767_x_at	0.00568938	8.345e-06	1.19949	0.262425	1.19949	up	1.69369	0.760173	1.69369	up	1.72805	0.789147	1.72805	up	1.75618	0.81244	1.75618	up	3069	Hs.471851	gb:AA515560 /DB_XREF=gi:2255160 /DB_XREF=ni42c09.s1 /CLONE=IMAGE:979504 /FEA=mRNA /CNT=108 /TID=Hs.283473.1 /TIER=Stack /STK=12 /UG=Hs.283473 /LL=55498 /UG_GENE=PRO2900 /UG_TITLE=hypothetical protein PRO2900
COPA	208684_at	0.00568938	8.42871e-06	1.31963	0.400128	1.31963	up	1.87451	0.906515	1.87451	up	1.53327	0.616615	1.53327	up	1.47144	0.557226	1.47144	up	1314	Hs.162121	gb:U24105.1 /DB_XREF=gi:1638873 /GEN=COPA /FEA=FLmRNA /CNT=327 /TID=Hs.75887.0 /TIER=FL+Stack /STK=36 /UG=Hs.75887 /LL=1314 /DEF=Homo sapiens coatomer protein (COPA) mRNA, complete cds. /PROD=coatomer protein /FL=gb:NM_004371.2 gb:U24105.1
RBBP4	217301_x_at	0.00569443	8.54035e-06	-1.00925	-0.0132811	1.00925	down	1.27289	0.348108	1.27289	up	1.28149	0.357824	1.28149	up	2.29226	1.19677	2.29226	up	5928	Hs.16003	gb:X71810.1 /DB_XREF=gi:297905 /GEN=9306 /FEA=mRNA /CNT=1 /TID=Hs.16003.3 /TIER=ConsEnd /STK=0 /UG=Hs.16003 /LL=5928 /DEF=H.sapiens IEF 9306 mRNA. /PROD=IEF SSP 9306
HACD2	227741_at	0.0057031	8.65766e-06	-1.03593	-0.0509307	1.03593	down	1.18718	0.247544	1.18718	up	-1.00456	-0.00655828	1.00456	down	2.20056	1.13787	2.20056	up	201562	Hs.705480	gb:AI813654 /DB_XREF=gi:5424869 /DB_XREF=wj65c01.x1 /CLONE=IMAGE:2407680 /FEA=EST /CNT=30 /TID=Hs.127478.0 /TIER=Stack /STK=15 /UG=Hs.127478 /UG_TITLE=ESTs, Weakly similar to T32252 hypothetical protein T15B7.2 - Caenorhabditis elegans (C.elegans)
P4HB	1564494_s_at	0.0061003	9.3722e-06	1.07689	0.106867	1.07689	up	1.9565	0.968272	1.9565	up	1.77524	0.828013	1.77524	up	4.17125	2.06048	4.17125	up	5034	Hs.464336	gb:AK075503.1 /DB_XREF=gi:22761689 /TID=Hs2.397055.1 /CNT=1 /FEA=mRNA /TIER=ConsEnd /STK=0 /UG=Hs.397055 /UG_TITLE=Homo sapiens cDNA PSEC0201 fis, clone HEMBA1002107, highly similar to PROTEIN DISULFIDE ISOMERASE PRECURSOR (PDI) (EC 5.3.4.1). /DEF=Homo sapiens cDNA PSEC0201 fis, clone HEMBA1002107, highly similar to PROTEIN DISULFIDE ISOMERASE PRECURSOR (PDI) (EC 5.3.4.1).
EIF4G1	208624_s_at	0.00630707	9.80522e-06	-1.16409	-0.219198	1.16409	down	1.02192	0.0312861	1.02192	up	-1.01115	-0.0160023	1.01115	down	1.89926	0.925437	1.89926	up	1981	Hs.433750	gb:BE966878 /DB_XREF=gi:11772751 /DB_XREF=601660888R1 /CLONE=IMAGE:3915909 /FEA=FLmRNA /CNT=468 /TID=Hs.211568.1 /TIER=Stack /STK=13 /UG=Hs.211568 /LL=1981 /UG_GENE=EIF4G1 /UG_TITLE=eukaryotic translation initiation factor 4 gamma, 1 /FL=gb:AF104913.1
DEF8	225637_at	0.00637158	1.0022e-05	1.0448	0.063225	1.0448	up	2.03379	1.02417	2.03379	up	2.01472	1.01058	2.01472	up	2.20844	1.14303	2.20844	up	54849	Hs.62771	gb:BE676248 /DB_XREF=gi:10036789 /DB_XREF=7f25h08.x1 /CLONE=IMAGE:3295743 /FEA=mRNA /CNT=66 /TID=Hs.62771.0 /TIER=Stack /STK=24 /UG=Hs.62771 /UG_TITLE=Homo sapiens mRNA; cDNA DKFZp761E1423 (from clone DKFZp761E1423)
KRAS	214352_s_at	0.00664811	1.08062e-05	-1.14142	-0.190832	1.14142	down	-1.05519	-0.0775006	1.05519	down	-4.13259	-2.04704	4.13259	down	-2.06553	-1.04652	2.06553	down	3845	Hs.505033	gb:BF673699 /DB_XREF=gi:11947594 /DB_XREF=602136427F1 /CLONE=IMAGE:4272774 /FEA=EST /CNT=11 /TID=Hs.184050.1 /TIER=Stack /STK=9 /UG=Hs.184050 /LL=3845 /UG_GENE=KRAS2 /UG_TITLE=v-Ki-ras2 Kirsten rat sarcoma 2 viral oncogene homolog
AKAP13	227039_at	0.00664811	1.09331e-05	-1.04199	-0.0593421	1.04199	down	1.45445	0.540474	1.45445	up	-1.1504	-0.20214	1.1504	down	-1.40453	-0.490083	1.40453	down	11214	Hs.459211	gb:AI674926 /DB_XREF=gi:4875406 /DB_XREF=wc73g12.x1 /CLONE=IMAGE:2324326 /FEA=mRNA /CNT=32 /TID=Hs.29893.0 /TIER=Stack /STK=8 /UG=Hs.29893 /UG_TITLE=Homo sapiens mRNA full length insert cDNA clone EUROIMAGE 146397
IFI27	202411_at	0.00664811	1.11262e-05	3.15863	1.6593	3.15863	up	-36.0556	-5.17215	36.0556	down	-26.9902	-4.75437	26.9902	down	-44.6838	-5.48168	44.6838	down	3429	Hs.532634	gb:NM_005532.1 /DB_XREF=gi:5031780 /GEN=IFI27 /FEA=FLmRNA /CNT=179 /TID=Hs.278613.0 /TIER=FL+Stack /STK=110 /UG=Hs.278613 /LL=3429 /DEF=Homo sapiens interferon, alpha-inducible protein 27 (IFI27), mRNA. /PROD=interferon, alpha-inducible protein 27 /FL=gb:NM_005532.1
PTP4A2	208615_s_at	0.00664811	1.11742e-05	1.00789	0.0113351	1.00789	up	1.30562	0.384737	1.30562	up	-1.65528	-0.727079	1.65528	down	-1.39315	-0.47835	1.39315	down	8073	Hs.470477	gb:BF795101 /DB_XREF=gi:12100155 /DB_XREF=602256433F1 /CLONE=IMAGE:4339496 /FEA=FLmRNA /CNT=472 /TID=Hs.82911.0 /TIER=Stack /STK=24 /UG=Hs.82911 /LL=8073 /UG_GENE=PTP4A2 /UG_TITLE=protein tyrosine phosphatase type IVA, member 2 /FL=gb:U48297.1 gb:AF208850.1 gb:NM_003479.1
STK4	236259_at	0.00664811	1.12526e-05	-1.07258	-0.101086	1.07258	down	1.51468	0.599015	1.51468	up	-1.716	-0.77905	1.716	down	-1.24209	-0.312773	1.24209	down	6789	Hs.472838	gb:BF433725 /DB_XREF=gi:11445924 /DB_XREF=7q65g02.x1 /CLONE=IMAGE:3703466 /FEA=EST /CNT=11 /TID=Hs.268051.0 /TIER=ConsEnd /STK=5 /UG=Hs.268051 /UG_TITLE=ESTs
NCKAP1L	209734_at	0.00664811	1.13264e-05	1.15686	0.210212	1.15686	up	-1.79527	-0.844205	1.79527	down	1.61152	0.688422	1.61152	up	1.59161	0.670483	1.59161	up	3071	Hs.182014	gb:BC001604.1 /DB_XREF=gi:12804404 /FEA=FLmRNA /CNT=66 /TID=Hs.132834.0 /TIER=FL /STK=1 /UG=Hs.132834 /LL=3071 /UG_GENE=HEM1 /DEF=Homo sapiens, hematopoietic protein 1, clone MGC:2204, mRNA, complete cds. /PROD=hematopoietic protein 1 /FL=gb:NM_005337.1 gb:BC001604.1 gb:M58285.1
	233769_at	0.00664811	1.14285e-05	1.01103	0.0158266	1.01103	up	1.30209	0.380828	1.30209	up	1.21721	0.283576	1.21721	up	1.02719	0.0386974	1.02719	up			gb:AK023548.1 /DB_XREF=gi:10435515 /FEA=mRNA /CNT=2 /TID=Hs.141441.0 /TIER=ConsEnd /STK=0 /UG=Hs.141441 /UG_TITLE=Homo sapiens cDNA FLJ13747 fis, clone PLACE3000276 /DEF=Homo sapiens cDNA FLJ13486 fis, clone PLACE1003900.
SLMAP	224149_x_at	0.00664811	1.14298e-05	1.0654	0.0913917	1.0654	up	1.22508	0.292874	1.22508	up	1.05733	0.0804196	1.05733	up	2.15974	1.11086	2.15974	up	7871	Hs.476432	gb:AF304450.1 /DB_XREF=gi:11935052 /FEA=FLmRNA /CNT=2 /TID=Hs.4007.1 /TIER=FL /STK=0 /UG=Hs.4007 /LL=7871 /UG_GENE=SLAP /DEF=Homo sapiens sarcolemmal associated protein 1 mRNA, complete cds, alternatively spliced. /PROD=sarcolemmal associated protein 1 /FL=gb:AF304450.1
TMCO3	220240_s_at	0.00673978	1.17106e-05	1.19337	0.255038	1.19337	up	2.19444	1.13385	2.19444	up	2.04201	1.02999	2.04201	up	3.88023	1.95614	3.88023	up	55002	Hs.317593	gb:NM_017905.1 /DB_XREF=gi:8923574 /GEN=FLJ20623 /FEA=FLmRNA /CNT=9 /TID=Hs.27337.0 /TIER=FL /STK=0 /UG=Hs.27337 /LL=55002 /DEF=Homo sapiens hypothetical protein FLJ20623 (FLJ20623), mRNA. /PROD=hypothetical protein FLJ20623 /FL=gb:NM_017905.1
TDG	203742_s_at	0.0067568	1.19447e-05	-1.51871	-0.602849	1.51871	down	-1.40116	-0.486622	1.40116	down	-1.43413	-0.520174	1.43413	down	-2.33297	-1.22217	2.33297	down	6996	Hs.584809	gb:BF674842 /DB_XREF=gi:11948737 /DB_XREF=602136708F1 /CLONE=IMAGE:4273393 /FEA=FLmRNA /CNT=81 /TID=Hs.173824.0 /TIER=Stack /STK=16 /UG=Hs.173824 /LL=6996 /UG_GENE=TDG /UG_TITLE=thymine-DNA glycosylase /FL=gb:U51166.1 gb:NM_003211.1
DICER1	206061_s_at	0.0067568	1.21172e-05	1.26482	0.33893	1.26482	up	3.05997	1.61352	3.05997	up	-1.67861	-0.747263	1.67861	down	1.15082	0.202664	1.15082	up	23405	Hs.87889	gb:NM_030621.1 /DB_XREF=gi:13449288 /GEN=KIAA0928 /FEA=FLmRNA /CNT=23 /TID=Hs.87889.0 /TIER=FL /STK=0 /UG=Hs.87889 /LL=23405 /DEF=Homo sapiens helicase-moi (KIAA0928), mRNA. /PROD=helicase-moi /FL=gb:AB028449.1 gb:NM_030621.1
GSN	214040_s_at	0.0067568	1.21293e-05	-1.10655	-0.146063	1.10655	down	1.84962	0.887228	1.84962	up	1.32668	0.407818	1.32668	up	3.8933	1.96099	3.8933	up	2934	Hs.522373	gb:BE675337 /DB_XREF=gi:10035878 /DB_XREF=7f07c05.x1 /CLONE=IMAGE:3293960 /FEA=EST /CNT=28 /TID=Hs.290070.3 /TIER=Stack /STK=10 /UG=Hs.290070 /LL=2934 /UG_GENE=GSN /UG_TITLE=gelsolin (amyloidosis, Finnish type)
BRI3BP///THRIL	231810_at	0.0067568	1.22345e-05	1.34095	0.423255	1.34095	up	1.88023	0.910909	1.88023	up	2.79618	1.48346	2.79618	up	2.70521	1.43574	2.70521	up	140707///102659353	Hs.596464	gb:BG106919 /DB_XREF=gi:12600765 /DB_XREF=602291326F1 /CLONE=IMAGE:4386007 /FEA=mRNA /CNT=58 /TID=Hs.131886.0 /TIER=ConsEnd /STK=0 /UG=Hs.131886 /UG_TITLE=Homo sapiens cDNA: FLJ22113 fis, clone HEP18418
	239701_at	0.00683137	1.24945e-05	-1.11301	-0.154468	1.11301	down	2.50125	1.32265	2.50125	up	-1.1027	-0.141043	1.1027	down	-1.00713	-0.0102564	1.00713	down		Hs.661976	gb:BF508564 /DB_XREF=gi:11591862 /DB_XREF=UI-H-BI4-aoo-b-07-0-UI.s1 /CLONE=IMAGE:3085404 /FEA=EST /CNT=4 /TID=Hs.199310.0 /TIER=ConsEnd /STK=4 /UG=Hs.199310 /UG_TITLE=ESTs
LOC100129034	225214_at	0.00683863	1.26911e-05	1.1646	0.219833	1.1646	up	1.94846	0.962337	1.94846	up	2.25986	1.17623	2.25986	up	2.03556	1.02543	2.03556	up	100129034	Hs.654980	gb:AI762915 /DB_XREF=gi:5178582 /DB_XREF=wi63h02.x1 /CLONE=IMAGE:2398035 /FEA=EST /CNT=108 /TID=Hs.5663.0 /TIER=Stack /STK=51 /UG=Hs.5663 /UG_TITLE=ESTs
RTN3	219549_s_at	0.00683863	1.27579e-05	1.1014	0.139336	1.1014	up	4.03774	2.01355	4.03774	up	3.21028	1.6827	3.21028	up	4.74773	2.24724	4.74773	up	10313	Hs.743229	gb:NM_006054.1 /DB_XREF=gi:5174654 /GEN=RTN3 /FEA=FLmRNA /CNT=28 /TID=Hs.252831.0 /TIER=FL /STK=0 /UG=Hs.252831 /LL=10313 /DEF=Homo sapiens reticulon 3 (RTN3), mRNA. /PROD=reticulon 3 /FL=gb:AF059524.1 gb:BC000634.1 gb:AF119297.1 gb:NM_006054.1
HSP90AB1	1557910_at	0.00687295	1.29669e-05	-1.47016	-0.555976	1.47016	down	-2.24532	-1.16692	2.24532	down	-1.8424	-0.881584	1.8424	down	1.13336	0.180608	1.13336	up	3326	Hs.509736	gb:BG612458 /DB_XREF=gi:13663829 /DB_XREF=602640233F1 /CLONE=IMAGE:4771113 /TID=Hs2.434250.1 /CNT=52 /FEA=mRNA /TIER=ConsEnd /STK=0 /UG=Hs.434250 /UG_TITLE=Human mRNA for heat shock protein 90kDa, 5UTR (sequence from the 5cap to the start codon).
UBE4B	210685_s_at	0.00687295	1.31749e-05	-1.05046	-0.0710155	1.05046	down	1.7296	0.790442	1.7296	up	1.8326	0.87389	1.8326	up	2.18691	1.12889	2.18691	up	10277	Hs.593974	gb:AB028839.1 /DB_XREF=gi:13516466 /GEN=HDNB1UFD2 /FEA=FLmRNA /CNT=4 /TID=Hs.24594.1 /TIER=FL /STK=0 /UG=Hs.24594 /LL=10277 /DEF=Homo sapiens HDNB1(homzygously deleted in neuroblastoma-1)UFD2 mRNA, complete cds. /PROD=homzygously deleted in neuroblastoma-1UFD2 /FL=gb:AB028839.1
ARPC4	217818_s_at	0.00687295	1.31991e-05	-1.00193	-0.00278002	1.00193	down	1.84518	0.88376	1.84518	up	1.24283	0.313629	1.24283	up	3.0355	1.60193	3.0355	up	10093	Hs.323342	gb:NM_005718.1 /DB_XREF=gi:5031594 /GEN=ARPC4 /FEA=FLmRNA /CNT=208 /TID=Hs.323342.0 /TIER=FL+Stack /STK=8 /UG=Hs.323342 /LL=10093 /DEF=Homo sapiens actin related protein 23 complex, subunit 4 (20 kD) (ARPC4), mRNA. /PROD=actin related protein 23 complex, subunit 4 (20kD) /FL=gb:AF006087.1 gb:NM_005718.1
GSR	205770_at	0.00707328	1.39365e-05	-1.08503	-0.117739	1.08503	down	2.29952	1.20133	2.29952	up	1.34073	0.42302	1.34073	up	3.35918	1.74811	3.35918	up	2936	Hs.271510	gb:NM_000637.1 /DB_XREF=gi:10835188 /GEN=GSR /FEA=FLmRNA /CNT=28 /TID=Hs.121524.0 /TIER=FL /STK=0 /UG=Hs.121524 /LL=2936 /DEF=Homo sapiens glutathione reductase (GSR), mRNA. /PROD=glutathione reductase /FL=gb:AF228704.1 gb:NM_000637.1
FAM126B	1558959_at	0.00707328	1.39569e-05	1.03562	0.0504968	1.03562	up	1.35345	0.436639	1.35345	up	1.01655	0.0236803	1.01655	up	2.06561	1.04657	2.06561	up	285172	Hs.24701	gb:AK095236.1 /DB_XREF=gi:21754448 /TID=Hs2.24701.1 /CNT=15 /FEA=mRNA /TIER=ConsEnd /STK=0 /UG=Hs.24701 /UG_TITLE=Homo sapiens cDNA FLJ37917 fis, clone CTONG1000137. /DEF=Homo sapiens cDNA FLJ37917 fis, clone CTONG1000137.
CAMKK2	210787_s_at	0.00707328	1.39719e-05	1.1135	0.155101	1.1135	up	1.48838	0.573741	1.48838	up	1.12365	0.168192	1.12365	up	3.30906	1.72642	3.30906	up	10645	Hs.297343	gb:AF140507.1 /DB_XREF=gi:4877950 /GEN=CAMKKB /FEA=FLmRNA /CNT=2 /TID=Hs.108708.1 /TIER=FL /STK=0 /UG=Hs.108708 /LL=10645 /DEF=Homo sapiens Ca2+calmodulin-dependent protein kinase kinase beta (CAMKKB) mRNA, complete cds. /PROD=Ca2+calmodulin-dependent protein kinase kinasebeta /FL=gb:AF140507.1
STIP1	212009_s_at	0.00740289	1.47584e-05	1.04169	0.0589316	1.04169	up	1.00885	0.0127083	1.00885	up	-1.12741	-0.173015	1.12741	down	1.97049	0.978555	1.97049	up	10963	Hs.337295	gb:AL553320 /DB_XREF=gi:12893045 /DB_XREF=AL553320 /CLONE=CS0DI075YG04 (5 prime) /FEA=EST /CNT=237 /TID=Hs.75612.2 /TIER=Stack /STK=8 /UG=Hs.75612 /LL=10963 /UG_GENE=STIP1 /UG_TITLE=stress-induced-phosphoprotein 1 (Hsp70Hsp90-organizing protein)
MTPAP	229676_at	0.00742079	1.49298e-05	-1.00548	-0.0078789	1.00548	down	-2.04951	-1.03528	2.04951	down	-2.6472	-1.40447	2.6472	down	-2.39434	-1.25963	2.39434	down	55149	Hs.173946	gb:AA400998 /DB_XREF=gi:2054870 /DB_XREF=zu50f08.s1 /CLONE=IMAGE:741447 /FEA=EST /CNT=12 /TID=Hs.173946.1 /TIER=Stack /STK=10 /UG=Hs.173946 /LL=55149 /UG_GENE=FLJ10486 /UG_TITLE=hypothetical protein FLJ10486
HADHA	208629_s_at	0.00752251	1.5272e-05	-1.21814	-0.284679	1.21814	down	1.34798	0.430797	1.34798	up	1.17634	0.234303	1.17634	up	2.09776	1.06885	2.09776	up	3030	Hs.516032	gb:BG472176 /DB_XREF=gi:13404550 /DB_XREF=602513910F1 /CLONE=IMAGE:4645587 /FEA=FLmRNA /CNT=488 /TID=Hs.75860.0 /TIER=Stack /STK=46 /UG=Hs.75860 /LL=3030 /UG_GENE=HADHA /UG_TITLE=hydroxyacyl-Coenzyme A dehydrogenase3-ketoacyl-Coenzyme A thiolaseenoyl-Coenzyme A hydratase (trifunctional protein), alpha subunit /FL=gb:NM_000182.1 gb:U04627.1 gb:D16480.1
SLC48A1	48106_at	0.00767539	1.57626e-05	1.10225	0.140449	1.10225	up	1.52216	0.606118	1.52216	up	1.60601	0.683477	1.60601	up	1.64735	0.720146	1.64735	up	55652	Hs.438867	Cluster Incl. H14241:ym63e09.r1 Homo sapiens cDNA, 5 end /clone=IMAGE-163624 /clone_end=5' /gb=H14241 /gi=879061 /ug=Hs.109297 /len=552
RCC1	206499_s_at	0.00767539	1.59406e-05	-1.14698	-0.197843	1.14698	down	-1.84672	-0.884961	1.84672	down	1.12564	0.170744	1.12564	up	1.19349	0.255181	1.19349	up	1104	Hs.469723	gb:NM_001269.1 /DB_XREF=gi:4502800 /GEN=CHC1 /FEA=FLmRNA /CNT=15 /TID=Hs.84746.0 /TIER=FL /STK=1 /UG=Hs.84746 /LL=1104 /DEF=Homo sapiens chromosome condensation 1 (CHC1), mRNA. /PROD=chromosome condensation 1 /FL=gb:NM_001269.1
TBL1X	213400_s_at	0.00767539	1.60035e-05	1.31604	0.396199	1.31604	up	1.69912	0.76479	1.69912	up	1.65277	0.724887	1.65277	up	1.16319	0.218084	1.16319	up	6907	Hs.495656	gb:AV753028 /DB_XREF=gi:10910876 /DB_XREF=AV753028 /CLONE=NPDBCD07 /FEA=EST /CNT=89 /TID=Hs.76536.1 /TIER=ConsEnd /STK=0 /UG=Hs.76536 /LL=6907 /UG_GENE=TBL1 /UG_TITLE=transducin (beta)-like 1
	217679_x_at	0.00772908	1.62569e-05	-1.41165	-0.497386	1.41165	down	-1.05634	-0.0790745	1.05634	down	-1.44846	-0.534525	1.44846	down	-2.62023	-1.3897	2.62023	down			gb:AI683552 /DB_XREF=gi:4893734 /DB_XREF=tx67h02.x1 /CLONE=IMAGE:2274675 /FEA=EST /CNT=3 /TID=Hs.201605.0 /TIER=ConsEnd /STK=3 /UG=Hs.201605 /UG_TITLE=ESTs, Moderately similar to ALU8_HUMAN ALU SUBFAMILY SX SEQUENCE CONTAMINATION WARNING ENTRY (H.sapiens)
EPSTI1	227609_at	0.0077569	1.64573e-05	1.34046	0.422725	1.34046	up	-6.44303	-2.68774	6.44303	down	-5.23672	-2.38866	5.23672	down	-5.95492	-2.57408	5.95492	down	94240	Hs.546467	gb:AA633203 /DB_XREF=gi:2556617 /DB_XREF=nq57b02.s1 /CLONE=IMAGE:1147947 /FEA=EST /CNT=32 /TID=Hs.180669.2 /TIER=Stack /STK=19 /UG=Hs.180669 /LL=10106 /UG_GENE=OS4 /UG_TITLE=conserved gene amplified in osteosarcoma
EPSTI1	235276_at	0.00780482	1.67017e-05	1.12086	0.164612	1.12086	up	-7.81044	-2.9654	7.81044	down	-4.8316	-2.2725	4.8316	down	-8.36749	-3.06479	8.36749	down	94240	Hs.546467	gb:AA781795 /DB_XREF=gi:2841126 /DB_XREF=ai51d05.s1 /CLONE=1360521 /FEA=EST /CNT=14 /TID=Hs.122587.0 /TIER=ConsEnd /STK=1 /UG=Hs.122587 /UG_TITLE=ESTs
ARID4B	224322_at	0.00790467	1.70599e-05	-1.10328	-0.141796	1.10328	down	1.03994	0.0564958	1.03994	up	-1.15649	-0.209753	1.15649	down	-1.1806	-0.23952	1.1806	down	51742		gb:AB030181.1 /DB_XREF=gi:6730949 /FEA=FLmRNA /CNT=1 /TID=HsAffx.900259.511 /TIER=FL /STK=0 /DEF=Homo sapiens mRNA for RBP1-like protein, complete cds. /PROD=RBP1-like protein /FL=gb:AB030181.1
ZNF24	203247_s_at	0.00823286	1.79188e-05	-1.0556	-0.078068	1.0556	down	-1.49416	-0.579333	1.49416	down	-2.00843	-1.00607	2.00843	down	-1.73942	-0.798609	1.73942	down	7572	Hs.514802	gb:BC003566.1 /DB_XREF=gi:13097725 /FEA=FLmRNA /CNT=90 /TID=Hs.183593.0 /TIER=FL+Stack /STK=12 /UG=Hs.183593 /LL=7572 /UG_GENE=ZNF24 /DEF=Homo sapiens, zinc finger protein 24 (KOX 17), clone MGC:2057, mRNA, complete cds. /PROD=zinc finger protein 24 (KOX 17) /FL=gb:U68536.1 gb:NM_006965.1 gb:AF038964.1 gb:BC003566.1
COPA	214336_s_at	0.00824549	1.80971e-05	-1.16198	-0.216586	1.16198	down	-1.10982	-0.150327	1.10982	down	-2.33816	-1.22538	2.33816	down	1.71519	0.778366	1.71519	up	1314	Hs.162121	gb:AI621079 /DB_XREF=gi:4630205 /DB_XREF=ts76f11.x1 /CLONE=IMAGE:2237229 /FEA=EST /CNT=11 /TID=Hs.75887.1 /TIER=Stack /STK=10 /UG=Hs.75887 /LL=1314 /UG_GENE=COPA /UG_TITLE=coatomer protein complex, subunit alpha
SEC61A1	222385_x_at	0.00826147	1.82833e-05	1.09816	0.135087	1.09816	up	1.33041	0.411873	1.33041	up	1.10145	0.139408	1.10145	up	2.4196	1.27477	2.4196	up	29927	Hs.518236	gb:AF346602.1 /DB_XREF=gi:13517988 /FEA=FLmRNA /CNT=482 /TID=Hs.306079.0 /TIER=FL /STK=5 /UG=Hs.306079 /LL=29927 /UG_GENE=HSEC61 /DEF=Homo sapiens Sec61 alpha form 1 mRNA, complete cds. /PROD=Sec61 alpha form 1 /FL=gb:AF346602.1 gb:AF084458.1 gb:NM_013336.1 gb:BC002951.1
	1558831_x_at	0.00838906	1.87191e-05	-1.2914	-0.368938	1.2914	down	1.03784	0.0535853	1.03784	up	-1.38241	-0.467188	1.38241	down	-1.80676	-0.853405	1.80676	down		Hs.636147	gb:BU940166 /DB_XREF=gi:24128985 /DB_XREF=AGENCOURT_10576666 /CLONE=IMAGE:6709306 /TID=Hs2.213728.1 /CNT=7 /FEA=mRNA /TIER=ConsEnd /STK=0 /UG=Hs.213728 /UG_TITLE=Homo sapiens cDNA FLJ34403 fis, clone HCHON2001607.
CD99L2	233825_s_at	0.00854485	1.9223e-05	1.25954	0.332891	1.25954	up	1.55319	0.635232	1.55319	up	1.80731	0.853846	1.80731	up	1.64556	0.718583	1.64556	up	83692	Hs.522805	gb:AU158444 /DB_XREF=gi:11019965 /DB_XREF=AU158444 /CLONE=PLACE2000399 /FEA=mRNA /CNT=2 /TID=Hs.169388.1 /TIER=ConsEnd /STK=1 /UG=Hs.169388 /UG_TITLE=Homo sapiens cDNA FLJ14216 fis, clone NT2RP3003672, weakly similar to T-CELL SURFACE GLYCOPROTEIN E2 PRECURSOR
IFI44L	204439_at	0.00874298	1.99682e-05	1.64214	0.715574	1.64214	up	-37.8866	-5.24362	37.8866	down	-25.1067	-4.65	25.1067	down	-27.4543	-4.77896	27.4543	down	10964	Hs.744918	gb:NM_006820.1 /DB_XREF=gi:5803026 /GEN=GS3686 /FEA=FLmRNA /CNT=58 /TID=Hs.75470.0 /TIER=FL+Stack /STK=19 /UG=Hs.75470 /LL=10964 /DEF=Homo sapiens hypothetical protein, expressed in osteoblast (GS3686), mRNA. /PROD=hypothetical protein, expressed in osteoblast /FL=gb:NM_006820.1 gb:AB000115.1
PPP3R1	204506_at	0.00874298	1.99885e-05	-1.12142	-0.165331	1.12142	down	2.18429	1.12717	2.18429	up	1.06218	0.087022	1.06218	up	2.30164	1.20266	2.30164	up	5534	Hs.280604	gb:AL544951 /DB_XREF=gi:12877432 /DB_XREF=AL544951 /CLONE=CS0DI012YC11 (5 prime) /FEA=FLmRNA /CNT=54 /TID=Hs.278540.0 /TIER=Stack /STK=8 /UG=Hs.278540 /LL=5534 /UG_GENE=PPP3R1 /UG_TITLE=protein phosphatase 3 (formerly 2B), regulatory subunit B (19kD), alpha isoform (calcineurin B, type I) /FL=gb:M30773.1 gb:NM_000945.1
	1559436_x_at	0.00902472	2.07977e-05	-1.09918	-0.136431	1.09918	down	1.93389	0.951505	1.93389	up	1.02867	0.0407831	1.02867	up	-1.66013	-0.731293	1.66013	down		Hs.684047	gb:AL832061.1 /DB_XREF=gi:21732602 /TID=Hs2.378764.1 /CNT=7 /FEA=mRNA /TIER=ConsEnd /STK=0 /UG=Hs.378764 /UG_TITLE=Homo sapiens mRNA; cDNA DKFZp313M2114 (from clone DKFZp313M2114) /DEF=Homo sapiens mRNA; cDNA DKFZp313M2114 (from clone DKFZp313M2114).
PDGFC	222719_s_at	0.00909133	2.12481e-05	1.00902	0.0129616	1.00902	up	1.76813	0.822226	1.76813	up	2.05367	1.0382	2.05367	up	2.33785	1.22518	2.33785	up	56034	Hs.570855	gb:AB033831.1 /DB_XREF=gi:9392293 /GEN=hSCDGF /FEA=FLmRNA /CNT=76 /TID=Hs.43080.0 /TIER=FL /STK=0 /UG=Hs.43080 /LL=56034 /DEF=Homo sapiens hSCDGF mRNA for spinal cord-derived growth factor, complete cds. /PROD=spinal cord-derived growth factor /FL=gb:NM_016205.1 gb:AB033831.1 gb:AF091434.1 gb:AF244813.1
KIAA1033	215936_s_at	0.00909133	2.15132e-05	-1.52648	-0.610204	1.52648	down	-1.04181	-0.0590977	1.04181	down	-3.37366	-1.75432	3.37366	down	-1.37484	-0.459262	1.37484	down	23325	Hs.12144	gb:AK001657.1 /DB_XREF=gi:7023048 /FEA=mRNA /CNT=2 /TID=Hs.12144.1 /TIER=ConsEnd /STK=1 /UG=Hs.12144 /LL=23325 /UG_GENE=KIAA1033 /UG_TITLE=KIAA1033 protein /DEF=Homo sapiens cDNA FLJ10795 fis, clone NT2RP4000638.
HNRNPU	216855_s_at	0.00909133	2.16913e-05	-1.20344	-0.267159	1.20344	down	-1.18834	-0.248953	1.18834	down	-1.2602	-0.333654	1.2602	down	2.03345	1.02393	2.03345	up	3192	Hs.106212	gb:D13413.1 /DB_XREF=gi:433414 /FEA=mRNA /CNT=1 /TID=Hs.103804.2 /TIER=ConsEnd /STK=0 /UG=Hs.103804 /LL=3192 /UG_GENE=HNRPU /DEF=Human mRNA for tumor-associated 120 kDa nuclear protein p120, partial cds(carboxyl terminus). /PROD=p120
ANKRD13D	238642_at	0.00909133	2.1782e-05	1.02308	0.0329185	1.02308	up	2.6109	1.38455	2.6109	up	1.58263	0.662327	1.58263	up	-1.00588	-0.00846028	1.00588	down	338692	Hs.438673	gb:AW367571 /DB_XREF=gi:6872221 /DB_XREF=MR0-HT0164-021299-011-c07 /FEA=EST /CNT=7 /TID=Hs.159717.0 /TIER=ConsEnd /STK=0 /UG=Hs.159717 /UG_TITLE=ESTs
	237062_at	0.00909133	2.19239e-05	-1.18635	-0.246531	1.18635	down	-1.13761	-0.186008	1.13761	down	-4.98786	-2.31842	4.98786	down	-2.6224	-1.39089	2.6224	down		Hs.666472	gb:BE222109 /DB_XREF=gi:8909427 /DB_XREF=hu05h12.x1 /CLONE=IMAGE:3165767 /FEA=EST /CNT=6 /TID=Hs.159970.0 /TIER=ConsEnd /STK=5 /UG=Hs.159970 /UG_TITLE=ESTs
NSMAF	1558775_s_at	0.00909133	2.19489e-05	-1.07604	-0.105729	1.07604	down	-1.06515	-0.0910553	1.06515	down	-1.51842	-0.602566	1.51842	down	1.42448	0.510432	1.42448	up	8439	Hs.372000	gb:AU142380 /DB_XREF=gi:11003901 /DB_XREF=AU142380 /CLONE=Y79AA1000239 /TID=Hs2.376593.1 /CNT=9 /FEA=mRNA /TIER=ConsEnd /STK=0 /UG=Hs.376593 /UG_TITLE=Homo sapiens cDNA FLJ34825 fis, clone NT2NE2008785, weakly similar to ANTER-SPECIFIC PROLINE-RICH PROTEIN APG.
	232405_at	0.00910522	2.2253e-05	-1.17288	-0.230049	1.17288	down	1.86553	0.899589	1.86553	up	-1.47307	-0.558822	1.47307	down	-1.12488	-0.169771	1.12488	down		Hs.662234	gb:AK026485.1 /DB_XREF=gi:10439357 /FEA=mRNA /CNT=9 /TID=Hs.212643.0 /TIER=ConsEnd /STK=6 /UG=Hs.212643 /UG_TITLE=Homo sapiens cDNA: FLJ22832 fis, clone KAIA4195 /DEF=Homo sapiens cDNA: FLJ22832 fis, clone KAIA4195.
PPIG	208993_s_at	0.00910522	2.23317e-05	-1.01038	-0.0149017	1.01038	down	-1.62973	-0.704635	1.62973	down	-2.46733	-1.30295	2.46733	down	-2.03993	-1.02852	2.03993	down	9360	Hs.470544	gb:AW340788 /DB_XREF=gi:6837414 /DB_XREF=ha12h05.x1 /CLONE=IMAGE:2873529 /FEA=FLmRNA /CNT=195 /TID=Hs.77965.0 /TIER=Stack /STK=8 /UG=Hs.77965 /LL=9360 /UG_GENE=PPIG /UG_TITLE=peptidyl-prolyl isomerase G (cyclophilin G) /FL=gb:NM_004792.1 gb:U40763.1
XAF1	206133_at	0.00910522	2.2482e-05	1.12398	0.168618	1.12398	up	-5.84716	-2.54774	5.84716	down	-6.91379	-2.78948	6.91379	down	-4.86683	-2.28298	4.86683	down	54739	Hs.441975	gb:NM_017523.1 /DB_XREF=gi:8923794 /GEN=HSXIAPAF1 /FEA=FLmRNA /CNT=14 /TID=Hs.139262.0 /TIER=FL /STK=1 /UG=Hs.139262 /LL=54739 /DEF=Homo sapiens XIAP associated factor-1 (HSXIAPAF1), mRNA. /PROD=XIAP associated factor-1 /FL=gb:NM_017523.1
	213747_at	0.0092645	2.30448e-05	-1.19054	-0.251611	1.19054	down	-2.60288	-1.38011	2.60288	down	-2.9518	-1.5616	2.9518	down	-2.42888	-1.28029	2.42888	down			gb:AA047234 /DB_XREF=gi:1525134 /DB_XREF=zf50b09.s1 /CLONE=IMAGE:380345 /FEA=EST /CNT=45 /TID=Hs.223014.1 /TIER=Stack /STK=9 /UG=Hs.223014 /LL=51582 /UG_GENE=LOC51582 /UG_TITLE=antizyme inhibitor
BCAS2	203053_at	0.00970168	2.43097e-05	-1.05767	-0.0808837	1.05767	down	-2.29859	-1.20075	2.29859	down	-2.11445	-1.08028	2.11445	down	-2.23211	-1.15841	2.23211	down	10286	Hs.22960	gb:NM_005872.1 /DB_XREF=gi:5031652 /GEN=BCAS2 /FEA=FLmRNA /CNT=190 /TID=Hs.22960.0 /TIER=FL+Stack /STK=31 /UG=Hs.22960 /LL=10286 /DEF=Homo sapiens breast carcinoma amplified sequence 2 (BCAS2), mRNA. /PROD=breast carcinoma amplified sequence 2 /FL=gb:AF081788.1 gb:NM_005872.1 gb:BC005285.1 gb:AB020623.1
QSER1	229982_at	0.00973887	2.47704e-05	-1.52791	-0.611562	1.52791	down	-1.12021	-0.163768	1.12021	down	-2.42311	-1.27686	2.42311	down	-1.82364	-0.866824	1.82364	down	79832	Hs.369368	gb:AW195525 /DB_XREF=gi:6474657 /DB_XREF=xn39e11.x1 /CLONE=IMAGE:2696108 /FEA=EST /CNT=14 /TID=Hs.23165.0 /TIER=Stack /STK=12 /UG=Hs.23165 /UG_TITLE=ESTs
SERINC3	221473_x_at	0.00973887	2.47902e-05	1.08485	0.117498	1.08485	up	2.11711	1.0821	2.11711	up	-1.10676	-0.14634	1.10676	down	1.17218	0.229199	1.17218	up	10955	Hs.272168	gb:U49188.1 /DB_XREF=gi:1293562 /GEN=Diff33 /FEA=FLmRNA /CNT=404 /TID=Hs.272168.0 /TIER=FL /STK=0 /UG=Hs.272168 /LL=10955 /UG_TITLE=tumor differentially expressed 1 /DEF=Human placenta (Diff33) mRNA, complete cds. /FL=gb:U49188.1 gb:AF112227.1 gb:AF153979.1 gb:NM_006811.1
EIF2AK2	213294_at	0.00973887	2.5113e-05	1.15427	0.20698	1.15427	up	-4.33991	-2.11767	4.33991	down	-4.31015	-2.10774	4.31015	down	-3.0353	-1.60184	3.0353	down	5610		gb:AV755522 /DB_XREF=gi:10913370 /DB_XREF=AV755522 /CLONE=BMFAWG03 /FEA=EST /CNT=43 /TID=Hs.306117.1 /TIER=Stack /STK=32 /UG=Hs.306117 /UG_TITLE=Homo sapiens clone FLC0675 PRO2870 mRNA, complete cds
EIF4EBP2	208769_at	0.00973887	2.51153e-05	-1.08188	-0.113542	1.08188	down	1.19798	0.2606	1.19798	up	1.21584	0.281952	1.21584	up	1.96347	0.973404	1.96347	up	1979	Hs.621200	gb:AW500473 /DB_XREF=gi:7113120 /DB_XREF=UI-HF-BN0-akb-e-12-0-UI.r1 /CLONE=IMAGE:3076702 /FEA=FLmRNA /CNT=301 /TID=Hs.278712.0 /TIER=ConsEnd /STK=0 /UG=Hs.278712 /LL=1979 /UG_GENE=EIF4EBP2 /UG_TITLE=eukaryotic translation initiation factor 4E binding protein 2 /FL=gb:BC005057.1 gb:NM_004096.1 gb:L36056.1
CANX	208853_s_at	0.0100433	2.61407e-05	1.18881	0.24952	1.18881	up	1.96279	0.972908	1.96279	up	1.87404	0.906151	1.87404	up	3.72016	1.89537	3.72016	up	821	Hs.567968	gb:L18887.1 /DB_XREF=gi:306480 /FEA=FLmRNA /CNT=288 /TID=Hs.155560.0 /TIER=FL /STK=0 /UG=Hs.155560 /LL=821 /UG_GENE=CANX /DEF=Human calnexin mRNA, complete cds. /PROD=calnexin /FL=gb:L18887.1 gb:L10284.1 gb:M94859.1 gb:NM_001746.1 gb:BC003552.1 gb:M98452.1
APH1A	1554417_s_at	0.0100433	2.62679e-05	1.04847	0.0682872	1.04847	up	1.68376	0.751686	1.68376	up	1.17216	0.22917	1.17216	up	3.39931	1.76524	3.39931	up	51107	Hs.108408	gb:AY113699.1 /DB_XREF=gi:25989509 /GEN=PSF /TID=Hs2.108408.3 /CNT=25 /FEA=FLmRNA /TIER=FL /STK=1 /LL=51107 /UG=Hs.108408 /DEF=Homo sapiens presenilin stabilization factor b (PSF) mRNA, complete cds; alternatively spliced. /PROD=presenilin stabilization factor b /FL=gb:AY113699.1
PCYT1A	225069_at	0.0100896	2.65735e-05	1.47517	0.560877	1.47517	up	1.82133	0.864996	1.82133	up	1.92498	0.944843	1.92498	up	1.50307	0.587912	1.50307	up	5130	Hs.135997	gb:BF063382 /DB_XREF=gi:10822292 /DB_XREF=7h89a10.x1 /CLONE=IMAGE:3323130 /FEA=mRNA /CNT=123 /TID=Hs.311002.0 /TIER=Stack /STK=63 /UG=Hs.311002 /UG_TITLE=Homo sapiens cDNA FLJ10705 fis, clone NT2RP3000850
	233702_x_at	0.0101307	2.68669e-05	-1.37363	-0.457995	1.37363	down	1.13735	0.185681	1.13735	up	-1.19688	-0.259282	1.19688	down	-2.00724	-1.00521	2.00724	down		Hs.677277	gb:AK024599.1 /DB_XREF=gi:10436912 /FEA=mRNA /CNT=2 /TID=Hs.306696.0 /TIER=ConsEnd /STK=0 /UG=Hs.306696 /UG_TITLE=Homo sapiens cDNA: FLJ20946 fis, clone ADSE01819 /DEF=Homo sapiens cDNA: FLJ20946 fis, clone ADSE01819.
RAD23B	201222_s_at	0.0101343	2.72379e-05	1.11495	0.156981	1.11495	up	-3.07953	-1.62271	3.07953	down	1.1747	0.232289	1.1747	up	1.33917	0.42134	1.33917	up	5887	Hs.521640	gb:AL527365 /DB_XREF=gi:12790858 /DB_XREF=AL527365 /CLONE=CS0DC021YG08 (5 prime) /FEA=FLmRNA /CNT=276 /TID=Hs.178658.0 /TIER=Stack /STK=14 /UG=Hs.178658 /LL=5887 /UG_GENE=RAD23B /UG_TITLE=RAD23 (S. cerevisiae) homolog B /FL=gb:D21090.1 gb:NM_002874.1
DALRD3	221934_s_at	0.0101343	2.74134e-05	-1.21078	-0.275932	1.21078	down	1.0194	0.0277167	1.0194	up	1.09465	0.130472	1.09465	up	1.51034	0.594875	1.51034	up	55152	Hs.708076	gb:BF941492 /DB_XREF=gi:12358812 /DB_XREF=nac74d09.x1 /CLONE=IMAGE:3439937 /FEA=EST /CNT=28 /TID=Hs.280978.1 /TIER=Stack /STK=11 /UG=Hs.280978 /LL=55152 /UG_GENE=FLJ10496 /UG_TITLE=hypothetical protein FLJ10496
PRDX5	222994_at	0.0101343	2.75265e-05	-1.13601	-0.183975	1.13601	down	1.62198	0.697757	1.62198	up	1.42413	0.51008	1.42413	up	1.7783	0.830495	1.7783	up	25824	Hs.502823	gb:AF197952.1 /DB_XREF=gi:6166492 /FEA=FLmRNA /CNT=226 /TID=Hs.31731.0 /TIER=FL /STK=1 /UG=Hs.31731 /LL=25824 /UG_GENE=PRDX5 /DEF=Homo sapiens thioredoxin peroxidase PMP20 mRNA, complete cds. /PROD=thioredoxin peroxidase PMP20 /FL=gb:AF231705.1 gb:AF242525.1 gb:AF112212.1 gb:AF110731.1 gb:NM_012094.1 gb:AF197952.1 gb:AF124993.1
PRKAR1A	200604_s_at	0.0101343	2.7618e-05	1.048	0.0676451	1.048	up	1.84995	0.887485	1.84995	up	1.59928	0.677422	1.59928	up	4.25992	2.09083	4.25992	up	5573	Hs.280342	gb:M18468.1 /DB_XREF=gi:1526988 /GEN=PRKAR1A /FEA=FLmRNA /CNT=474 /TID=Hs.183037.0 /TIER=FL+Stack /STK=44 /UG=Hs.183037 /LL=5573 /DEF=Human cAMP-dependent protein kinase regulatory subunit type I (PRKAR1A) mRNA, complete cds. /PROD=cAMP-dependent protein kinase regulatory subunittype 1 /FL=gb:M33336.1 gb:M18468.1 gb:NM_002734.1
TBC1D9	212960_at	0.0101481	2.79565e-05	-1.04302	-0.0607692	1.04302	down	1.03084	0.0438166	1.03084	up	2.14669	1.10211	2.14669	up	1.70142	0.766743	1.70142	up	23158	Hs.480819	gb:BE646554 /DB_XREF=gi:9970865 /DB_XREF=7e89a04.x1 /CLONE=IMAGE:3292302 /FEA=mRNA /CNT=71 /TID=Hs.90419.0 /TIER=Stack /STK=12 /UG=Hs.90419 /LL=23158 /UG_GENE=KIAA0882 /UG_TITLE=KIAA0882 protein
	215628_x_at	0.0101481	2.85383e-05	-1.14344	-0.193383	1.14344	down	1.0419	0.0592099	1.0419	up	-1.20924	-0.274106	1.20924	down	-1.94612	-0.960597	1.94612	down		Hs.669939	gb:AL049285.1 /DB_XREF=gi:4500045 /FEA=mRNA /CNT=3 /TID=Hs.302053.0 /TIER=ConsEnd /STK=0 /UG=Hs.302053 /UG_TITLE=Homo sapiens mRNA; cDNA DKFZp564M193 (from clone DKFZp564M193) /DEF=Homo sapiens mRNA; cDNA DKFZp564M193 (from clone DKFZp564M193).
KCTD3	217894_at	0.0101481	2.87162e-05	1.08227	0.114056	1.08227	up	1.52164	0.60563	1.52164	up	1.4232	0.509141	1.4232	up	2.12083	1.08463	2.12083	up	51133	Hs.335139	gb:NM_016121.1 /DB_XREF=gi:7705836 /GEN=LOC51133 /FEA=FLmRNA /CNT=181 /TID=Hs.239155.0 /TIER=FL+Stack /STK=44 /UG=Hs.239155 /LL=51133 /DEF=Homo sapiens NY-REN-45 antigen (LOC51133), mRNA. /PROD=NY-REN-45 antigen /FL=gb:NM_016121.1 gb:AF155110.1
NEAT1	238320_at	0.0101481	2.88352e-05	-1.98087	-0.986136	1.98087	down	6.62113	2.72708	6.62113	up	-1.13169	-0.17848	1.13169	down	2.64885	1.40537	2.64885	up	283131	Hs.523789	gb:AV659198 /DB_XREF=gi:9880212 /DB_XREF=AV659198 /CLONE=GLCFUE07 /FEA=EST /CNT=102 /TID=Hs.11367.0 /TIER=ConsEnd /STK=0 /UG=Hs.11367 /UG_TITLE=ESTs
	234566_at	0.0101481	2.89394e-05	-1.02232	-0.0318496	1.02232	down	1.15999	0.214113	1.15999	up	1.23475	0.304216	1.23475	up	1.03895	0.0551317	1.03895	up		Hs.675486	gb:AL137309.1 /DB_XREF=gi:6807792 /FEA=mRNA /CNT=1 /TID=Hs.306448.0 /TIER=ConsEnd /STK=0 /UG=Hs.306448 /UG_TITLE=Homo sapiens mRNA; cDNA DKFZp761E11121 (from clone DKFZp761E11121) /DEF=Homo sapiens mRNA; cDNA DKFZp761E11121 (from clone DKFZp761E11121).
CPEB4	224829_at	0.0101481	2.89714e-05	1.25351	0.325977	1.25351	up	4.32995	2.11435	4.32995	up	-1.30993	-0.389492	1.30993	down	1.81594	0.86072	1.81594	up	80315	Hs.127126	gb:AA772278 /DB_XREF=gi:2824061 /DB_XREF=ai42d03.s1 /CLONE=1359653 /FEA=mRNA /CNT=144 /TID=Hs.301444.0 /TIER=Stack /STK=10 /UG=Hs.301444 /LL=80315 /UG_GENE=KIAA1673 /UG_TITLE=KIAA1673
DAP3	227608_at	0.0101481	2.91424e-05	1.07004	0.0976655	1.07004	up	-1.67822	-0.746933	1.67822	down	-1.17571	-0.233527	1.17571	down	-1.05882	-0.082461	1.05882	down	7818		gb:AA225118 /DB_XREF=gi:1846492 /DB_XREF=nc21h02.r1 /CLONE=IMAGE:1008819 /FEA=EST /CNT=44 /TID=Hs.18851.3 /TIER=Stack /STK=30 /UG=Hs.18851 /LL=55249 /UG_GENE=FLJ10875 /UG_TITLE=hypothetical protein FLJ10875
EPB41	207793_s_at	0.0101481	2.91554e-05	-1.18854	-0.249192	1.18854	down	1.11232	0.15357	1.11232	up	-1.18557	-0.245586	1.18557	down	2.65579	1.40914	2.65579	up	2035	Hs.175437	gb:NM_004437.1 /DB_XREF=gi:4758273 /GEN=EPB41 /FEA=FLmRNA /CNT=3 /TID=Hs.37427.0 /TIER=FL /STK=0 /UG=Hs.37427 /LL=2035 /DEF=Homo sapiens erythrocyte membrane protein band 4.1 (elliptocytosis 1, RH-linked) (EPB41), mRNA. /PROD=erythrocyte membrane protein band 4.1(elliptocytosis 1, RH-linked) /FL=gb:NM_004437.1 gb:M14993.1
CCNY	224652_at	0.0101481	2.9326e-05	1.07026	0.0979592	1.07026	up	2.12072	1.08455	2.12072	up	1.61481	0.69136	1.61481	up	1.81628	0.860987	1.81628	up	219771	Hs.14745	gb:AV701987 /DB_XREF=gi:10718317 /DB_XREF=AV701987 /CLONE=ADBBVE12 /FEA=EST /CNT=321 /TID=Hs.6820.0 /TIER=Stack /STK=42 /UG=Hs.6820 /UG_TITLE=ESTs, Weakly similar to YOJ1_CAEEL HYPOTHETICAL 63.5 KD PROTEIN ZK353.1 IN CHROMOSOME III (C.elegans)
PTMA	208549_x_at	0.0102654	2.98526e-05	-1.22582	-0.293747	1.22582	down	-2.34751	-1.23113	2.34751	down	-1.60334	-0.68108	1.60334	down	-1.63117	-0.705905	1.63117	down	5757	Hs.459927	gb:NM_016171.1 /DB_XREF=gi:7706414 /GEN=LOC51685 /FEA=FLmRNA /CNT=3 /TID=Hs.247919.0 /TIER=FL /STK=0 /UG=Hs.247919 /LL=51685 /DEF=Homo sapiens prothymosin a14 (LOC51685), mRNA. /PROD=prothymosin a14 /FL=gb:NM_016171.1 gb:AF170294.1
KCNE3	222922_at	0.0102831	3.00924e-05	-1.00534	-0.00768238	1.00534	down	3.10675	1.63541	3.10675	up	1.73031	0.791027	1.73031	up	5.36868	2.42457	5.36868	up	10008	Hs.523899	gb:AF302494.1 /DB_XREF=gi:10304441 /GEN=KCNE3 /FEA=FLmRNA /CNT=23 /TID=Hs.30715.0 /TIER=FL /STK=5 /UG=Hs.30715 /LL=10008 /DEF=Homo sapiens voltage-gated K+ channel subunit MIRP2 (KCNE3) mRNA, complete cds. /PROD=voltage-gated K+ channel subunit MIRP2 /FL=gb:NM_005472.1 gb:AF076531.1 gb:AF302494.1
SREK1IP1	1553581_s_at	0.0103694	3.06632e-05	1.21001	0.27502	1.21001	up	-2.00463	-1.00334	2.00463	down	-1.78629	-0.836965	1.78629	down	-1.4106	-0.496308	1.4106	down	285672	Hs.69504	gb:NM_173829.1 /DB_XREF=gi:27883881 /TID=Hs2Affx.1.49 /CNT=1 /FEA=FLmRNA /TIER=FL /STK=1 /NOTE=sequence(s) not in UniGene /DEF=Homo sapiens hypothetical protein FLJ36754 (FLJ36754), mRNA. /FL=gb:NM_173829.1
AP3D1	210974_s_at	0.0103694	3.07242e-05	-1.36284	-0.446612	1.36284	down	-1.04934	-0.0694766	1.04934	down	1.09334	0.128736	1.09334	up	1.65422	0.726155	1.65422	up	8943	Hs.512815	gb:AF130042.1 /DB_XREF=gi:11493394 /FEA=FLmRNA /CNT=2 /TID=Hs.75056.1 /TIER=FL /STK=0 /UG=Hs.75056 /LL=8943 /UG_GENE=AP3D1 /DEF=Homo sapiens clone FLB0124 PRO0039 mRNA, complete cds. /PROD=PRO0039 /FL=gb:AF130042.1
SYK	226068_at	0.0104311	3.10979e-05	1.24653	0.317918	1.24653	up	1.94721	0.961405	1.94721	up	2.39268	1.25863	2.39268	up	1.95053	0.963867	1.95053	up	6850	Hs.371720	gb:BF593625 /DB_XREF=gi:11685949 /DB_XREF=nac01f08.x1 /CLONE=IMAGE:3276062 /FEA=EST /CNT=53 /TID=Hs.74101.2 /TIER=Stack /STK=32 /UG=Hs.74101 /LL=6850 /UG_GENE=SYK /UG_TITLE=spleen tyrosine kinase
ITGB3	204625_s_at	0.0105306	3.17114e-05	-1.22779	-0.296069	1.22779	down	2.05217	1.03715	2.05217	up	1.26234	0.336104	1.26234	up	5.47764	2.45355	5.47764	up	3690	Hs.218040	gb:BF115658 /DB_XREF=gi:10985134 /DB_XREF=7n82b10.x1 /CLONE=IMAGE:3571146 /FEA=FLmRNA /CNT=66 /TID=Hs.87149.0 /TIER=Stack /STK=16 /UG=Hs.87149 /LL=3690 /UG_GENE=ITGB3 /UG_TITLE=integrin, beta 3 (platelet glycoprotein IIIa, antigen CD61) /FL=gb:J02703.1 gb:M35999.1 gb:M20311.1 gb:NM_000212.1
SRPK1	202199_s_at	0.0105306	3.18305e-05	-1.00339	-0.00488445	1.00339	down	1.77334	0.826472	1.77334	up	1.292	0.369604	1.292	up	1.97104	0.978955	1.97104	up	6732	Hs.443861	gb:AW082913 /DB_XREF=gi:6038065 /DB_XREF=xc04c12.x1 /CLONE=IMAGE:2583286 /FEA=FLmRNA /CNT=179 /TID=Hs.75761.0 /TIER=Stack /STK=8 /UG=Hs.75761 /LL=6732 /UG_GENE=SRPK1 /UG_TITLE=SFRS protein kinase 1 /FL=gb:NM_003137.1 gb:U09564.1
GZMB	210164_at	0.0105306	3.21691e-05	1.59431	0.672936	1.59431	up	-5.89984	-2.56068	5.89984	down	-2.83763	-1.50468	2.83763	down	-4.92417	-2.29988	4.92417	down	3002	Hs.1051	gb:J03189.1 /DB_XREF=gi:338010 /FEA=FLmRNA /CNT=28 /TID=Hs.1051.1 /TIER=FL+Stack /STK=11 /UG=Hs.1051 /LL=3002 /UG_GENE=GZMB /UG_TITLE=granzyme B (granzyme 2, cytotoxic T-lymphocyte-associated serine esterase 1) /DEF=Human proteolytic serine esterase-like protein (SECT) gene, complete cds. /FL=gb:M17016.1 gb:J03189.1 gb:NM_004131.2 gb:J04071.1
TMTC2	235775_at	0.0105306	3.22071e-05	1.30154	0.380223	1.30154	up	4.84972	2.2779	4.84972	up	2.00473	1.00341	2.00473	up	1.93616	0.953201	1.93616	up	160335	Hs.577775	gb:AI765006 /DB_XREF=gi:5231515 /DB_XREF=wh56a08.x1 /CLONE=IMAGE:2384726 /FEA=EST /CNT=9 /TID=Hs.145014.0 /TIER=ConsEnd /STK=5 /UG=Hs.145014 /UG_TITLE=ESTs
	AFFX-HUMRGE/M10098_M_at	0.0105306	3.24773e-05	-1.01952	-0.0278871	1.01952	down	-4.37512	-2.12932	4.37512	down	-6.61877	-2.72656	6.61877	down	-13.2371	-3.72651	13.2371	down			H. sapiens /GEN=18S rRNA /DB_XREF=gb:M10098.1 /NOTE=SIF corresponding to nucleotides 688-1219 of gb:M10098.1 /DEF=Human 18S rRNA gene, complete.
MTMR3	211507_s_at	0.0105306	3.25499e-05	-1.07113	-0.0991373	1.07113	down	1.71727	0.780116	1.71727	up	1.35458	0.437847	1.35458	up	2.67317	1.41855	2.67317	up	8897	Hs.474536	gb:AF233437.1 /DB_XREF=gi:7208445 /FEA=FLmRNA /CNT=1 /TID=Hs.63302.1 /TIER=FL /STK=0 /UG=Hs.63302 /LL=8897 /UG_GENE=MTMR3 /DEF=Homo sapiens FYVE domain-containing dual specificity protein phosphatase FYVE-DSP1b mRNA, complete cds. /PROD=FYVE domain-containing dual specificity proteinphosphatase FYVE-DSP1b /FL=gb:AF233437.1
MTMR3	202198_s_at	0.0108024	3.35877e-05	-1.01935	-0.0276501	1.01935	down	1.50378	0.588592	1.50378	up	1.4621	0.54804	1.4621	up	2.62824	1.3941	2.62824	up	8897	Hs.474536	gb:AF233438.1 /DB_XREF=gi:7208447 /FEA=FLmRNA /CNT=169 /TID=Hs.63302.0 /TIER=FL /STK=0 /UG=Hs.63302 /LL=8897 /UG_GENE=MTMR3 /DEF=Homo sapiens FYVE domain-containing dual specificity protein phosphatase FYVE-DSP1c mRNA, complete cds. /PROD=FYVE domain-containing dual specificity proteinphosphatase FYVE-DSP1c /FL=gb:AB002369.1 gb:AF233438.1 gb:NM_021090.1
	229571_at	0.0110196	3.44645e-05	-1.22315	-0.290599	1.22315	down	1.04736	0.0667613	1.04736	up	-1.51978	-0.603863	1.51978	down	-1.51574	-0.600024	1.51574	down		Hs.655770	gb:AV763524 /DB_XREF=gi:10921372 /DB_XREF=AV763524 /CLONE=MDSCIH06 /FEA=EST /CNT=23 /TID=Hs.81263.0 /TIER=Stack /STK=8 /UG=Hs.81263 /UG_TITLE=ESTs
KLKB1	206541_at	0.0111279	3.51065e-05	-1.15283	-0.205185	1.15283	down	-1.26279	-0.336617	1.26279	down	-1.0316	-0.044879	1.0316	down	-1.34836	-0.431206	1.34836	down	3818	Hs.237642	gb:NM_000892.2 /DB_XREF=gi:9257226 /GEN=KLKB1 /FEA=FLmRNA /CNT=16 /TID=Hs.1901.0 /TIER=FL+Stack /STK=9 /UG=Hs.1901 /LL=3818 /DEF=Homo sapiens kallikrein B, plasma (Fletcher factor) 1 (KLKB1), mRNA. /PROD=plasma kallikrein B1 precursor /FL=gb:NM_000892.2
NOL7	210097_s_at	0.0111279	3.52104e-05	1.12063	0.164316	1.12063	up	-1.92549	-0.945226	1.92549	down	-1.93677	-0.953651	1.93677	down	-1.68433	-0.752176	1.68433	down	51406	Hs.306242	gb:AF130102.1 /DB_XREF=gi:11493507 /FEA=FLmRNA /CNT=18 /TID=Hs.106346.1 /TIER=ConsEnd /STK=0 /UG=Hs.106346 /LL=51406 /UG_GENE=RARG-1 /DEF=Homo sapiens clone FLB2205 PRO0522 mRNA, complete cds. /PROD=PRO0522 /FL=gb:AF130102.1
	240655_at	0.0112798	3.58972e-05	-1.1057	-0.144959	1.1057	down	2.14777	1.10284	2.14777	up	1.66996	0.73981	1.66996	up	1.383	0.467797	1.383	up			gb:BE502785 /DB_XREF=gi:9705193 /DB_XREF=hz79c12.x1 /CLONE=IMAGE:3214198 /FEA=EST /CNT=4 /TID=Hs.202242.0 /TIER=ConsEnd /STK=4 /UG=Hs.202242 /UG_TITLE=ESTs
	240205_x_at	0.0113681	3.63862e-05	-1.28912	-0.366385	1.28912	down	1.07253	0.101013	1.07253	up	-1.22706	-0.295204	1.22706	down	-1.74811	-0.805798	1.74811	down			gb:AW188170 /DB_XREF=gi:6462606 /DB_XREF=xj93c04.x1 /CLONE=IMAGE:2664774 /FEA=EST /CNT=4 /TID=Hs.271014.0 /TIER=ConsEnd /STK=4 /UG=Hs.271014 /UG_TITLE=ESTs, Moderately similar to ALU1_HUMAN ALU SUBFAMILY J SEQUENCE CONTAMINATION WARNING ENTRY (H.sapiens)
IKBKB	211027_s_at	0.0114528	3.68669e-05	-1.22706	-0.295201	1.22706	down	-1.31623	-0.396407	1.31623	down	-1.34466	-0.427247	1.34466	down	1.46847	0.554311	1.46847	up	3551	Hs.597664	gb:BC006231.1 /DB_XREF=gi:13623262 /FEA=FLmRNA /CNT=1 /TID=HsAffx.900932.658 /TIER=FL /STK=0 /DEF=Homo sapiens, Similar to inhibitor of kappa light polypeptide gene enhancer in B-cells, kinase beta, clone MGC:11285, mRNA, complete cds. /PROD=Similar to inhibitor of kappa light polypeptidegene enhancer in B-cells, kinase beta /FL=gb:BC006231.1
NCBP3	222779_s_at	0.0114557	3.71871e-05	1.24476	0.315864	1.24476	up	1.31382	0.393766	1.31382	up	1.30115	0.379788	1.30115	up	1.50034	0.585293	1.50034	up	55421	Hs.120963	gb:AA706815 /DB_XREF=gi:2716733 /DB_XREF=zj30d10.s1 /CLONE=IMAGE:451795 /FEA=FLmRNA /CNT=58 /TID=Hs.120963.0 /TIER=Stack /STK=10 /UG=Hs.120963 /LL=55421 /UG_GENE=HSA277841 /UG_TITLE=ELG protein /FL=gb:NM_018553.1
NSFL1C	220248_x_at	0.0114557	3.72951e-05	1.03689	0.0522645	1.03689	up	1.6048	0.682397	1.6048	up	1.16166	0.216191	1.16166	up	1.344	0.426534	1.344	up	55968	Hs.12865	gb:NM_018839.1 /DB_XREF=gi:10047113 /GEN=LOC55968 /FEA=FLmRNA /CNT=10 /TID=Hs.284261.0 /TIER=FL /STK=3 /UG=Hs.284261 /LL=55968 /DEF=Homo sapiens p47 protein (LOC55968), mRNA. /PROD=p47 protein /FL=gb:NM_018839.1 gb:AF112211.1
SBDS///SBDSP1	1554089_s_at	0.0118162	3.88923e-05	-1.08248	-0.114339	1.08248	down	-3.97115	-1.98956	3.97115	down	-2.01902	-1.01366	2.01902	down	-2.47329	-1.30643	2.47329	down	51119///155370	Hs.110445///Hs.585053	gb:BC010183.1 /DB_XREF=gi:14603469 /TID=Hs2.427306.1 /CNT=17 /FEA=FLmRNA /TIER=FL /STK=4 /LL=155370 /UG_GENE=SBDSP /UG=Hs.427306 /DEF=Homo sapiens, Similar to CGI-97 protein, clone MGC:19961 IMAGE:4329436, mRNA, complete cds. /PROD=Similar to CGI-97 protein /FL=gb:BC010183.1
MFSD14C	224078_at	0.0118162	3.91433e-05	-1.31239	-0.392194	1.31239	down	1.02345	0.033439	1.02345	up	-1.17633	-0.234289	1.17633	down	1.3101	0.389677	1.3101	up	84278	Hs.610084	gb:BC005058.1 /DB_XREF=gi:13477192 /FEA=FLmRNA /CNT=2 /TID=Hs.278823.0 /TIER=FL /STK=1 /UG=Hs.278823 /DEF=Homo sapiens, Similar to CG5078 gene product, clone MGC:12945, mRNA, complete cds. /PROD=Similar to CG5078 gene product /FL=gb:BC005058.1
VPS35	1561146_at	0.0118162	3.92287e-05	-1.21577	-0.281874	1.21577	down	1.34593	0.428605	1.34593	up	-1.32668	-0.407817	1.32668	down	-1.1217	-0.165693	1.1217	down	55737		gb:N51700 /DB_XREF=gi:1192866 /DB_XREF=yy72d01.s1 /CLONE=IMAGE:279073 /TID=Hs2.384625.1 /CNT=3 /FEA=mRNA /TIER=ConsEnd /STK=1 /UG=Hs.384625 /UG_TITLE=Homo sapiens full length insert cDNA clone YY72D01
CRKL	206184_at	0.0118162	3.96113e-05	-1.03414	-0.0484315	1.03414	down	1.33168	0.413242	1.33168	up	1.35924	0.4428	1.35924	up	2.17508	1.12107	2.17508	up	1399	Hs.5613	gb:NM_005207.1 /DB_XREF=gi:4885152 /GEN=CRKL /FEA=FLmRNA /CNT=16 /TID=Hs.37078.0 /TIER=FL /STK=0 /UG=Hs.37078 /LL=1399 /DEF=Homo sapiens v-crk avian sarcoma virus CT10 oncogene homolog-like (CRKL), mRNA. /PROD=v-crk avian sarcoma virus CT10 oncogenehomolog-like /FL=gb:NM_005207.1
HAUS2	220071_x_at	0.0118162	3.97427e-05	-1.31555	-0.395669	1.31555	down	1.05388	0.0757039	1.05388	up	-1.2086	-0.27334	1.2086	down	-2.07027	-1.04982	2.07027	down	55142	Hs.14347	gb:NM_018097.1 /DB_XREF=gi:8922429 /GEN=FLJ10460 /FEA=FLmRNA /CNT=12 /TID=Hs.14347.0 /TIER=FL /STK=0 /UG=Hs.14347 /LL=55142 /DEF=Homo sapiens hypothetical protein FLJ10460 (FLJ10460), mRNA. /PROD=hypothetical protein FLJ10460 /FL=gb:NM_018097.1
TRPM7	223323_x_at	0.0118162	3.97656e-05	-1.15341	-0.205905	1.15341	down	1.24565	0.316898	1.24565	up	-1.02045	-0.0291987	1.02045	down	1.34077	0.42306	1.34077	up	54822	Hs.512894	gb:BE044733 /DB_XREF=gi:8361786 /DB_XREF=hm55e09.x1 /CLONE=IMAGE:3016552 /FEA=FLmRNA /CNT=81 /TID=Hs.267914.0 /TIER=Stack /STK=26 /UG=Hs.267914 /UG_TITLE=Homo sapiens channel-kinase 1 (CHAK1) mRNA, complete cds /FL=gb:AF346629.2
EHBP1L1	1557749_at	0.0119717	4.05077e-05	-1.02697	-0.0383896	1.02697	down	2.35144	1.23354	2.35144	up	1.79428	0.843404	1.79428	up	4.14111	2.05002	4.14111	up	254102		gb:AK092750.1 /DB_XREF=gi:21751420 /TID=Hs2.213967.1 /CNT=3 /FEA=mRNA /TIER=ConsEnd /STK=1 /UG=Hs.213967 /UG_TITLE=Homo sapiens cDNA FLJ35431 fis, clone SMINT2002281. /DEF=Homo sapiens cDNA FLJ35431 fis, clone SMINT2002281.
PTPN18	203555_at	0.0121203	4.12324e-05	-1.1139	-0.155615	1.1139	down	2.17698	1.12233	2.17698	up	1.8396	0.879393	1.8396	up	2.92874	1.55028	2.92874	up	26469	Hs.744861	gb:NM_014369.1 /DB_XREF=gi:7657483 /GEN=PTPN18 /FEA=FLmRNA /CNT=87 /TID=Hs.278597.0 /TIER=FL /STK=0 /UG=Hs.278597 /LL=26469 /DEF=Homo sapiens protein tyrosine phosphatase, non-receptor type 18 (brain-derived) (PTPN18), mRNA. /PROD=protein tyrosine phosphatase, non-receptor type18 (brain-derived) /FL=gb:NM_014369.1
APOPT1	232814_x_at	0.012134	4.18521e-05	-1.34047	-0.422739	1.34047	down	1.02455	0.034996	1.02455	up	-1.25206	-0.324304	1.25206	down	-1.85167	-0.88883	1.85167	down	84334	Hs.598441	gb:AK024310.1 /DB_XREF=gi:10436658 /FEA=mRNA /CNT=9 /TID=Hs.116029.0 /TIER=ConsEnd /STK=0 /UG=Hs.116029 /UG_TITLE=Homo sapiens cDNA FLJ14248 fis, clone OVARC1001117 /DEF=Homo sapiens cDNA FLJ14248 fis, clone OVARC1001117.
TMED8	242617_at	0.012134	4.19682e-05	-1.23861	-0.308723	1.23861	down	2.01491	1.01071	2.01491	up	-1.58028	-0.660176	1.58028	down	1.16135	0.2158	1.16135	up	283578		gb:AI290654 /DB_XREF=gi:3933428 /DB_XREF=qm12b04.x1 /CLONE=IMAGE:1881583 /FEA=EST /CNT=5 /TID=Hs.225583.0 /TIER=ConsEnd /STK=3 /UG=Hs.225583 /UG_TITLE=ESTs
PTBP3	207223_s_at	0.012134	4.24561e-05	-1.06038	-0.0845869	1.06038	down	2.26991	1.18264	2.26991	up	-1.49058	-0.57587	1.49058	down	2.10818	1.076	2.10818	up	9991	Hs.269988	gb:NM_005156.1 /DB_XREF=gi:4826983 /GEN=ROD1 /FEA=FLmRNA /CNT=5 /TID=Hs.145078.0 /TIER=FL /STK=0 /UG=Hs.145078 /LL=9991 /DEF=Homo sapiens regulator of differentiation (in S. pombe) 1 (ROD1), mRNA. /PROD=regulator of differentiation (in S. pombe) 1 /FL=gb:NM_005156.1 gb:AB023967.1
SLC22A3	242578_x_at	0.012134	4.26247e-05	-1.34961	-0.43254	1.34961	down	1.04202	0.0593789	1.04202	up	-1.20799	-0.272613	1.20799	down	-2.16758	-1.11608	2.16758	down	6581	Hs.567337	gb:AV699746 /DB_XREF=gi:10301717 /DB_XREF=AV699746 /CLONE=GKCBYE11 /FEA=EST /CNT=5 /TID=Hs.242721.0 /TIER=ConsEnd /STK=3 /UG=Hs.242721 /UG_TITLE=ESTs, Weakly similar to ALU7_HUMAN ALU SUBFAMILY SQ SEQUENCE CONTAMINATION WARNING ENTRY (H.sapiens)
	240478_at	0.012134	4.27071e-05	-1.18518	-0.245112	1.18518	down	1.75255	0.80946	1.75255	up	-1.10931	-0.149658	1.10931	down	-1.62213	-0.697893	1.62213	down			gb:AA648983 /DB_XREF=gi:2575412 /DB_XREF=ns41f06.s1 /CLONE=IMAGE:1186211 /FEA=EST /CNT=4 /TID=Hs.212911.0 /TIER=ConsEnd /STK=4 /UG=Hs.212911 /UG_TITLE=ESTs
AKAP13	222024_s_at	0.012134	4.28974e-05	-1.00218	-0.0031356	1.00218	down	1.05727	0.0803489	1.05727	up	-1.13773	-0.186161	1.13773	down	-1.70358	-0.768572	1.70358	down	11214	Hs.459211///Hs.710656	gb:AK022014.1 /DB_XREF=gi:10433327 /FEA=mRNA /CNT=18 /TID=Hs.306619.0 /TIER=Stack /STK=10 /UG=Hs.306619 /UG_TITLE=Homo sapiens cDNA FLJ11952 fis, clone HEMBB1000831, weakly similar to Homo sapiens breast cancer nuclear receptor-binding auxiliary protein (BRX) mRNA /DEF=Homo sapiens cDNA FLJ11952 fis, clone HEMBB1000831, weakly similar to Homo sapiens breast cancer nuclear receptor-binding auxilia…
LAMP1	201551_s_at	0.012134	4.30379e-05	-1.12459	-0.169395	1.12459	down	1.51277	0.597192	1.51277	up	1.73961	0.798767	1.73961	up	3.3353	1.73782	3.3353	up	3916	Hs.494419	gb:J03263.1 /DB_XREF=gi:187178 /GEN=LAMP1 /FEA=FLmRNA /CNT=239 /TID=Hs.150101.0 /TIER=FL /STK=0 /UG=Hs.150101 /LL=3916 /UG_TITLE=lysosomal-associated membrane protein 1 /DEF=Human lysosome-associated membrane glycoprotein (lamp A) mRNA, complete cds. /FL=gb:J04182.1 gb:J03263.1 gb:NM_005561.2
SECISBP2	224250_s_at	0.012134	4.31026e-05	-1.02423	-0.0345467	1.02423	down	-1.08456	-0.117113	1.08456	down	-3.02738	-1.59807	3.02738	down	-1.94292	-0.95823	1.94292	down	79048	Hs.59804	gb:BC001189.1 /DB_XREF=gi:12654698 /FEA=FLmRNA /CNT=1 /TID=Hs.288141.1 /TIER=FL /STK=0 /UG=Hs.288141 /LL=79048 /UG_GENE=MGC3156 /DEF=Homo sapiens, clone MGC:3156, mRNA, complete cds. /PROD=Unknown (protein for MGC:3156) /FL=gb:BC001189.1
LSM14B	231200_at	0.012134	4.32763e-05	-1.05714	-0.0801638	1.05714	down	-1.03951	-0.0558975	1.03951	down	1.15492	0.207791	1.15492	up	1.75654	0.812736	1.75654	up	149986	Hs.105379	gb:BG222606 /DB_XREF=gi:12708127 /DB_XREF=naf78d11.x1 /CLONE=IMAGE:4170284 /FEA=EST /CNT=12 /TID=Hs.158470.0 /TIER=Stack /STK=8 /UG=Hs.158470 /UG_TITLE=ESTs
ZNF562	219163_at	0.0122519	4.40731e-05	-1.02316	-0.0330278	1.02316	down	-1.29772	-0.375977	1.29772	down	-1.82492	-0.867831	1.82492	down	-1.69401	-0.760441	1.69401	down	54811	Hs.371107	gb:NM_017656.1 /DB_XREF=gi:8923085 /GEN=FLJ20079 /FEA=FLmRNA /CNT=42 /TID=Hs.165948.0 /TIER=FL+Stack /STK=22 /UG=Hs.165948 /LL=54811 /DEF=Homo sapiens hypothetical protein FLJ20079 (FLJ20079), mRNA. /PROD=hypothetical protein FLJ20079 /FL=gb:NM_017656.1
RTN4	1556049_at	0.0122519	4.41451e-05	-1.03739	-0.0529542	1.03739	down	2.29298	1.19722	2.29298	up	-1.29072	-0.368173	1.29072	down	-1.47022	-0.556036	1.47022	down	57142		gb:CA428769 /DB_XREF=gi:24791489 /DB_XREF=UI-H-FH1-bfe-b-13-0-UI.s1 /CLONE=UI-H-FH1-bfe-b-13-0-UI /TID=Hs2.377218.1 /CNT=27 /FEA=mRNA /TIER=Stack /STK=12 /UG=Hs.377218 /UG_TITLE=Homo sapiens cDNA FLJ36466 fis, clone THYMU2015409.
EXT1	214985_at	0.0123166	4.46034e-05	-1.26691	-0.341311	1.26691	down	1.09955	0.136913	1.09955	up	-1.19839	-0.261098	1.19839	down	-1.26998	-0.344805	1.26998	down	2131	Hs.44690	gb:AF070571.1 /DB_XREF=gi:3387940 /FEA=mRNA /CNT=9 /TID=Hs.44690.0 /TIER=ConsEnd /STK=0 /UG=Hs.44690 /UG_TITLE=Homo sapiens clone 24739 mRNA sequence /DEF=Homo sapiens clone 24739 mRNA sequence.
RAB35	225620_at	0.0123266	4.48648e-05	1.18251	0.241853	1.18251	up	1.18778	0.248268	1.18778	up	1.29427	0.372143	1.29427	up	1.61672	0.693068	1.61672	up	11021	Hs.524788	gb:AL534848 /DB_XREF=gi:12798341 /DB_XREF=AL534848 /CLONE=CS0DF006YP22 (3 prime) /FEA=mRNA /CNT=68 /TID=Hs.94308.0 /TIER=Stack /STK=15 /UG=Hs.94308 /UG_TITLE=Homo sapiens cDNA FLJ10447 fis, clone NT2RP1000851
FBXW12	215600_x_at	0.0123979	4.56026e-05	-1.20259	-0.266143	1.20259	down	1.00964	0.0138361	1.00964	up	-1.24753	-0.31908	1.24753	down	-2.20881	-1.14327	2.20881	down	285231	Hs.288793	gb:AK022174.1 /DB_XREF=gi:10433510 /FEA=mRNA /CNT=4 /TID=Hs.288793.0 /TIER=ConsEnd /STK=0 /UG=Hs.288793 /UG_TITLE=Homo sapiens cDNA FLJ12112 fis, clone MAMMA1000043 /DEF=Homo sapiens cDNA FLJ12112 fis, clone MAMMA1000043.
SLC12A9	223994_s_at	0.0123979	4.5625e-05	-1.13822	-0.186775	1.13822	down	1.41573	0.50155	1.41573	up	1.50298	0.587824	1.50298	up	2.29807	1.20042	2.29807	up	56996	Hs.521087	gb:BC000154.2 /DB_XREF=gi:13111796 /FEA=FLmRNA /CNT=3 /TID=Hs.119178.1 /TIER=FL /STK=2 /UG=Hs.119178 /LL=56996 /UG_GENE=LOC56996 /DEF=Homo sapiens, cation-chloride cotransporter-interacting protein, clone MGC:5319, mRNA, complete cds. /PROD=cation-chloride cotransporter-interactingprotein /FL=gb:BC000154.2
	1564773_x_at	0.0123979	4.58047e-05	-1.14989	-0.2015	1.14989	down	-1.07034	-0.0980665	1.07034	down	-1.24081	-0.311286	1.24081	down	-1.59452	-0.67312	1.59452	down		Hs.680636	gb:BC015876.1 /DB_XREF=gi:16198415 /TID=Hs2.406924.1 /CNT=1 /FEA=mRNA /TIER=ConsEnd /STK=0 /UG=Hs.406924 /UG_TITLE=Homo sapiens, clone IMAGE:4715948, mRNA, partial cds /DEF=Homo sapiens, clone IMAGE:4715948, mRNA, partial cds.
UTP23	227402_s_at	0.0124707	4.6302e-05	-1.05201	-0.0731521	1.05201	down	-1.66356	-0.734277	1.66356	down	-2.73192	-1.44992	2.73192	down	-2.19217	-1.13236	2.19217	down	84294	Hs.86970	gb:AI056895 /DB_XREF=gi:3330684 /DB_XREF=oz03g12.x1 /CLONE=IMAGE:1674310 /FEA=EST /CNT=26 /TID=Hs.323662.0 /TIER=Stack /STK=8 /UG=Hs.323662 /UG_TITLE=ESTs, Weakly similar to T21571 hypothetical protein F30A10.9 - Caenorhabditis elegans (C.elegans)
SP1	1553685_s_at	0.0125262	4.67434e-05	1.06248	0.0874328	1.06248	up	2.39508	1.26007	2.39508	up	-1.01029	-0.0147712	1.01029	down	2.39662	1.261	2.39662	up	6667	Hs.649191	gb:NM_138473.1 /DB_XREF=gi:19924004 /TID=Hs2.348374.1 /CNT=35 /FEA=FLmRNA /TIER=FL /STK=0 /LL=144467 /UG_GENE=LOC144467 /UG=Hs.348374 /UG_TITLE=hypothetical protein BC012008 /DEF=Homo sapiens hypothetical protein BC012008 (LOC144467), mRNA. /FL=gb:NM_138473.1 gb:BC012008.1
ZNF721	215978_x_at	0.0125262	4.6966e-05	-1.39506	-0.480325	1.39506	down	1.005	0.007191	1.005	up	-1.35414	-0.437381	1.35414	down	-2.44312	-1.28872	2.44312	down	170960	Hs.724168	gb:AK021514.1 /DB_XREF=gi:10432710 /FEA=mRNA /CNT=2 /TID=Hs.148598.0 /TIER=ConsEnd /STK=0 /UG=Hs.148598 /UG_TITLE=Homo sapiens cDNA FLJ11452 fis, clone HEMBA1001435 /DEF=Homo sapiens cDNA FLJ11452 fis, clone HEMBA1001435.
PBX2	202876_s_at	0.0127722	4.81219e-05	-1.15317	-0.205608	1.15317	down	1.0107	0.0153619	1.0107	up	1.9665	0.975631	1.9665	up	1.41033	0.496031	1.41033	up	5089	Hs.509545	gb:NM_002586.1 /DB_XREF=gi:4505624 /GEN=PBX2 /FEA=FLmRNA /CNT=122 /TID=Hs.93728.0 /TIER=FL+Stack /STK=21 /UG=Hs.93728 /LL=5089 /DEF=Homo sapiens pre-B-cell leukemia transcription factor 2 (PBX2), mRNA. /PROD=pre-B-cell leukemia transcription factor 2 /FL=gb:NM_002586.1
DAPP1	222858_s_at	0.0128005	4.8906e-05	-1.3046	-0.383613	1.3046	down	1.88	0.910736	1.88	up	-1.92761	-0.946816	1.92761	down	-1.09459	-0.130395	1.09459	down	27071	Hs.436271	gb:AI632216 /DB_XREF=gi:4683546 /DB_XREF=tt20c11.x1 /CLONE=IMAGE:2241332 /FEA=FLmRNA /CNT=66 /TID=Hs.62643.0 /TIER=Stack /STK=22 /UG=Hs.62643 /LL=27071 /UG_GENE=DAPP1 /UG_TITLE=dual adaptor of phosphotyrosine and 3-phosphoinositides /FL=gb:NM_014395.1 gb:AF186022.1
LOC101927166	1561346_at	0.0128005	4.89085e-05	-1.39857	-0.483949	1.39857	down	-1.05634	-0.0790708	1.05634	down	-1.36546	-0.449388	1.36546	down	-2.36004	-1.23881	2.36004	down	101927166		gb:AW303888 /DB_XREF=gi:6713577 /DB_XREF=xr24h07.x1 /CLONE=IMAGE:2761117 /TID=Hs2.319071.1 /CNT=2 /FEA=mRNA /TIER=ConsEnd /STK=1 /UG=Hs.319071 /UG_TITLE=Homo sapiens cDNA FLJ32691 fis, clone TESTI2000221.
STT3A	202223_at	0.0128005	4.8931e-05	1.20491	0.268931	1.20491	up	1.85443	0.890975	1.85443	up	1.62529	0.7007	1.62529	up	2.93928	1.55546	2.93928	up	3703	Hs.504237	gb:NM_002219.1 /DB_XREF=gi:4504786 /GEN=ITM1 /FEA=FLmRNA /CNT=142 /TID=Hs.287850.0 /TIER=FL+Stack /STK=11 /UG=Hs.287850 /LL=3703 /DEF=Homo sapiens integral membrane protein 1 (ITM1), mRNA. /PROD=integral membrane protein 1 /FL=gb:NM_002219.1 gb:L38961.1
UBXN2A	235327_x_at	0.0128307	4.96177e-05	-1.32038	-0.400958	1.32038	down	-1.01241	-0.017795	1.01241	down	-1.39331	-0.47852	1.39331	down	-1.9989	-0.999203	1.9989	down	165324	Hs.591576	gb:BG111015 /DB_XREF=gi:12604521 /DB_XREF=602284688F1 /CLONE=IMAGE:4372100 /FEA=EST /CNT=13 /TID=Hs.265931.0 /TIER=ConsEnd /STK=0 /UG=Hs.265931 /UG_TITLE=ESTs
	233108_at	0.0128307	4.96485e-05	-1.19786	-0.260455	1.19786	down	-1.19363	-0.255358	1.19363	down	-1.27527	-0.350797	1.27527	down	-1.47344	-0.559185	1.47344	down		Hs.598988	gb:AW613396 /DB_XREF=gi:7318582 /DB_XREF=hh71f11.x1 /CLONE=IMAGE:2968269 /FEA=mRNA /CNT=3 /TID=Hs.296548.0 /TIER=ConsEnd /STK=1 /UG=Hs.296548 /UG_TITLE=Homo sapiens cDNA FLJ11206 fis, clone PLACE1007846
SLC19A1	209776_s_at	0.0128307	4.97505e-05	-1.15209	-0.204251	1.15209	down	1.4833	0.568813	1.4833	up	1.15796	0.211589	1.15796	up	1.90865	0.932553	1.90865	up	6573	Hs.84190	gb:U15939.1 /DB_XREF=gi:1222522 /GEN=hFOLT1 /FEA=FLmRNA /CNT=73 /TID=Hs.84190.1 /TIER=FL /STK=0 /UG=Hs.84190 /LL=6573 /DEF=Human placental folate transporter (hFOLT1) mRNA, complete cds. /PROD=placental folate transporter /FL=gb:AF004354.1 gb:U19720.1 gb:U15939.1 gb:U17566.1 gb:NM_003056.1
DLGAP4	233056_x_at	0.0132244	5.15188e-05	-1.36602	-0.449981	1.36602	down	1.06087	0.0852464	1.06087	up	-1.26006	-0.333494	1.26006	down	-2.07008	-1.04968	2.07008	down	22839		gb:AK024674.1 /DB_XREF=gi:10437012 /FEA=mRNA /CNT=5 /TID=Hs.190232.0 /TIER=ConsEnd /STK=0 /UG=Hs.190232 /UG_TITLE=Homo sapiens cDNA: FLJ21021 fis, clone CAE06069 /DEF=Homo sapiens cDNA: FLJ21021 fis, clone CAE06069.
MOB3A	235163_at	0.0132625	5.22446e-05	1.05088	0.071602	1.05088	up	1.41263	0.498387	1.41263	up	1.28382	0.360442	1.28382	up	2.28465	1.19197	2.28465	up	126308	Hs.744938	gb:BE311936 /DB_XREF=gi:9148690 /DB_XREF=601143005F1 /CLONE=IMAGE:3506785 /FEA=EST /CNT=22 /TID=Hs.136381.0 /TIER=ConsEnd /STK=0 /UG=Hs.136381 /UG_TITLE=ESTs, Highly similar to R26660 1, partial CDS (H.sapiens)
PRKAB1	201835_s_at	0.0132625	5.2357e-05	1.13762	0.186024	1.13762	up	-1.36508	-0.448984	1.36508	down	-1.5429	-0.625643	1.5429	down	1.12786	0.173585	1.12786	up	5564	Hs.741184	gb:NM_006253.1 /DB_XREF=gi:5453967 /GEN=PRKAB1 /FEA=FLmRNA /CNT=248 /TID=Hs.6061.0 /TIER=FL /STK=0 /UG=Hs.6061 /LL=5564 /DEF=Homo sapiens protein kinase, AMP-activated, beta 1 non-catalytic subunit (PRKAB1), mRNA. /PROD=protein kinase, AMP-activated, beta 1non-catalytic subunit /FL=gb:BC001056.1 gb:BC001007.1 gb:U83994.1 gb:NM_006253.1 gb:BC001823.1 gb:AF022116.1
	215604_x_at	0.0132625	5.25775e-05	-1.36645	-0.450433	1.36645	down	1.06002	0.0840918	1.06002	up	-1.24125	-0.311789	1.24125	down	-2.087	-1.06143	2.087	down		Hs.663149	gb:AK023783.1 /DB_XREF=gi:10435820 /FEA=mRNA /CNT=3 /TID=Hs.289035.0 /TIER=ConsEnd /STK=0 /UG=Hs.289035 /UG_TITLE=Homo sapiens cDNA FLJ13721 fis, clone PLACE2000450 /DEF=Homo sapiens cDNA FLJ13721 fis, clone PLACE2000450.
AIMP1	202542_s_at	0.0132625	5.28296e-05	-1.02474	-0.0352509	1.02474	down	-1.84185	-0.881159	1.84185	down	-1.61843	-0.694597	1.61843	down	-1.4355	-0.52155	1.4355	down	9255	Hs.591680	gb:NM_004757.1 /DB_XREF=gi:4758265 /GEN=SCYE1 /FEA=FLmRNA /CNT=133 /TID=Hs.146401.0 /TIER=FL+Stack /STK=34 /UG=Hs.146401 /LL=9255 /DEF=Homo sapiens small inducible cytokine subfamily E, member 1 (endothelial monocyte-activating) (SCYE1), mRNA. /PROD=small inducible cytokine subfamily E, member 1 /FL=gb:U10117.1 gb:NM_004757.1
ITGB3	204626_s_at	0.0132625	5.3137e-05	-1.23525	-0.304804	1.23525	down	2.30172	1.20271	2.30172	up	1.19046	0.251515	1.19046	up	3.62507	1.85801	3.62507	up	3690	Hs.218040	gb:J02703.1 /DB_XREF=gi:183452 /GEN=ITGB3 /FEA=FLmRNA /CNT=66 /TID=Hs.87149.0 /TIER=FL /STK=0 /UG=Hs.87149 /LL=3690 /UG_TITLE=integrin, beta 3 (platelet glycoprotein IIIa, antigen CD61) /DEF=Human endothelial membrane glycoprotein IIIa (GPIIIa) mRNA, complete cds. /FL=gb:J02703.1 gb:M35999.1 gb:M20311.1 gb:NM_000212.1
	230790_x_at	0.0132625	5.33831e-05	1.50949	0.594063	1.50949	up	-1.2133	-0.278936	1.2133	down	-1.42798	-0.513975	1.42798	down	-1.60122	-0.679174	1.60122	down			gb:AI589978 /DB_XREF=gi:4599026 /DB_XREF=tt72c12.x1 /CLONE=IMAGE:2246326 /FEA=mRNA /CNT=17 /TID=Hs.60548.1 /TIER=Stack /STK=12 /UG=Hs.60548 /LL=55453 /UG_GENE=PRO1635 /UG_TITLE=hypothetical protein PRO1635
MRPS36	224302_s_at	0.0132625	5.34501e-05	1.18998	0.250943	1.18998	up	-1.56743	-0.648405	1.56743	down	-1.9045	-0.929414	1.9045	down	-1.33295	-0.414619	1.33295	down	92259	Hs.631971	gb:AF271777.1 /DB_XREF=gi:12006210 /FEA=FLmRNA /CNT=1 /TID=Hs.41182.0 /TIER=FL /STK=0 /UG=Hs.41182 /DEF=Homo sapiens DC47 mRNA, complete cds. /PROD=DC47 /FL=gb:AF271777.1
GSN	200696_s_at	0.0132625	5.37686e-05	-1.16515	-0.220515	1.16515	down	3.33779	1.73889	3.33779	up	2.14921	1.10381	2.14921	up	4.5008	2.17018	4.5008	up	2934	Hs.522373	gb:NM_000177.1 /DB_XREF=gi:4504164 /GEN=GSN /FEA=FLmRNA /CNT=373 /TID=Hs.290070.0 /TIER=FL+Stack /STK=108 /UG=Hs.290070 /LL=2934 /DEF=Homo sapiens gelsolin (amyloidosis, Finnish type) (GSN), mRNA. /PROD=gelsolin (amyloidosis, Finnish type) /FL=gb:NM_000177.1
SUDS3	233841_s_at	0.0132625	5.38507e-05	1.07315	0.101849	1.07315	up	1.90575	0.930359	1.90575	up	2.22916	1.1565	2.22916	up	2.72466	1.44607	2.72466	up	64426	Hs.416630	gb:AK026749.1 /DB_XREF=gi:10439672 /FEA=mRNA /CNT=3 /TID=Hs.20104.1 /TIER=ConsEnd /STK=0 /UG=Hs.20104 /LL=64426 /UG_GENE=FLJ00052 /UG_TITLE=hypothetical protein FLJ00052 /DEF=Homo sapiens cDNA: FLJ23096 fis, clone LNG07417.
	233319_x_at	0.0134264	5.47614e-05	-1.2802	-0.356366	1.2802	down	1.16994	0.22643	1.16994	up	-1.0802	-0.111301	1.0802	down	-1.8979	-0.924403	1.8979	down		Hs.667880	gb:AK023907.1 /DB_XREF=gi:10435987 /FEA=mRNA /CNT=3 /TID=Hs.287602.0 /TIER=ConsEnd /STK=0 /UG=Hs.287602 /UG_TITLE=Homo sapiens cDNA FLJ13845 fis, clone THYRO1000815 /DEF=Homo sapiens cDNA FLJ13845 fis, clone THYRO1000815.
MGEA5	214972_at	0.013557	5.55422e-05	-1.64409	-0.717289	1.64409	down	1.53434	0.617614	1.53434	up	-2.07764	-1.05495	2.07764	down	-1.45872	-0.544703	1.45872	down	10724	Hs.500842	gb:AU144791 /DB_XREF=gi:11006312 /DB_XREF=AU144791 /CLONE=HEMBA1002971 /FEA=mRNA /CNT=11 /TID=Hs.274237.0 /TIER=ConsEnd /STK=1 /UG=Hs.274237 /UG_TITLE=Homo sapiens cDNA FLJ10126 fis, clone HEMBA1002971
	235954_at	0.0135964	5.59522e-05	-1.34259	-0.425016	1.34259	down	2.29245	1.19689	2.29245	up	1.57709	0.657266	1.57709	up	-1.12916	-0.175251	1.12916	down			gb:AA972597 /DB_XREF=gi:3147777 /DB_XREF=op78f01.s1 /CLONE=IMAGE:1582969 /FEA=EST /CNT=10 /TID=Hs.124977.0 /TIER=ConsEnd /STK=3 /UG=Hs.124977 /UG_TITLE=ESTs
STXBP5-AS1	1557891_s_at	0.0136175	5.6288e-05	1.08698	0.120324	1.08698	up	1.25903	0.332307	1.25903	up	1.19786	0.260462	1.19786	up	1.13572	0.183603	1.13572	up	729178	Hs.557608	gb:BC035182.1 /DB_XREF=gi:23273367 /TID=Hs2.397689.1 /CNT=3 /FEA=mRNA /TIER=ConsEnd /STK=1 /UG=Hs.397689 /UG_TITLE=Homo sapiens, clone IMAGE:5266307, mRNA /DEF=Homo sapiens, clone IMAGE:5266307, mRNA.
	242495_at	0.0136463	5.66567e-05	-1.16306	-0.217923	1.16306	down	-1.10376	-0.142431	1.10376	down	-1.29043	-0.367848	1.29043	down	-1.32844	-0.409733	1.32844	down		Hs.670330	gb:BE148571 /DB_XREF=gi:8611295 /DB_XREF=MR0-HT0241-150500-010-b05 /FEA=EST /CNT=6 /TID=Hs.202179.0 /TIER=ConsEnd /STK=0 /UG=Hs.202179 /UG_TITLE=ESTs
KCNE3	222923_s_at	0.0136835	5.72695e-05	1.00364	0.00524354	1.00364	up	2.03887	1.02777	2.03887	up	1.3381	0.42019	1.3381	up	3.17637	1.66738	3.17637	up	10008	Hs.523899	gb:AF302494.1 /DB_XREF=gi:10304441 /GEN=KCNE3 /FEA=FLmRNA /CNT=23 /TID=Hs.30715.0 /TIER=FL /STK=5 /UG=Hs.30715 /LL=10008 /DEF=Homo sapiens voltage-gated K+ channel subunit MIRP2 (KCNE3) mRNA, complete cds. /PROD=voltage-gated K+ channel subunit MIRP2 /FL=gb:NM_005472.1 gb:AF076531.1 gb:AF302494.1
LINC01578	226830_x_at	0.0136835	5.74999e-05	1.3275	0.40871	1.3275	up	-2.46818	-1.30345	2.46818	down	-2.33514	-1.22351	2.33514	down	-2.68634	-1.42564	2.68634	down	100507217	Hs.622504	gb:BG339245 /DB_XREF=gi:13145683 /DB_XREF=602437122F1 /CLONE=IMAGE:4555133 /FEA=EST /CNT=44 /TID=Hs.287864.1 /TIER=ConsEnd /STK=0 /UG=Hs.287864 /UG_TITLE=Homo sapiens cDNA FLJ14030 fis, clone HEMBA1004086
	217446_x_at	0.0136835	5.75621e-05	-1.29619	-0.374276	1.29619	down	-1.09369	-0.129203	1.09369	down	-1.30647	-0.385679	1.30647	down	-2.04329	-1.0309	2.04329	down		Hs.554681	gb:AL080160.1 /DB_XREF=gi:5262622 /FEA=mRNA /CNT=1 /TID=Hs.274517.0 /TIER=ConsEnd /STK=0 /UG=Hs.274517 /UG_TITLE=Homo sapiens mRNA; cDNA DKFZp434M054 (from clone DKFZp434M054) /DEF=Homo sapiens mRNA; cDNA DKFZp434M054 (from clone DKFZp434M054).
	242171_at	0.0136998	5.81465e-05	-1.1628	-0.217604	1.1628	down	1.14076	0.190001	1.14076	up	-1.08133	-0.112811	1.08133	down	-1.30708	-0.386348	1.30708	down			gb:AA693730 /DB_XREF=gi:2694668 /DB_XREF=zi55d08.s1 /CLONE=IMAGE:434703 /FEA=EST /CNT=4 /TID=Hs.122729.0 /TIER=ConsEnd /STK=3 /UG=Hs.122729 /UG_TITLE=ESTs, Weakly similar to ALU1_HUMAN ALU SUBFAMILY J SEQUENCE CONTAMINATION WARNING ENTRY (H.sapiens)
KIAA0430	1558697_a_at	0.0136998	5.83325e-05	-1.15997	-0.214085	1.15997	down	1.13669	0.184839	1.13669	up	-1.12694	-0.172406	1.12694	down	1.6103	0.687333	1.6103	up	9665	Hs.173524	gb:BI600341 /DB_XREF=gi:15493280 /DB_XREF=603250668F1 /CLONE=IMAGE:5302337 /TID=Hs2.30909.1 /CNT=28 /FEA=mRNA /TIER=ConsEnd /STK=0 /LL=9665 /UG_GENE=LKAP /UG=Hs.30909 /UG_TITLE=limkain b1
ELF1	212420_at	0.0136998	5.83823e-05	-1.1456	-0.196106	1.1456	down	-1.75172	-0.808776	1.75172	down	-3.57203	-1.83675	3.57203	down	-1.95657	-0.968327	1.95657	down	1997	Hs.135646	gb:AL559590 /DB_XREF=gi:12905223 /DB_XREF=AL559590 /CLONE=CS0DJ013YH24 (5 prime) /FEA=mRNA /CNT=181 /TID=Hs.154365.0 /TIER=Stack /STK=28 /UG=Hs.154365 /LL=1997 /UG_GENE=ELF1 /UG_TITLE=E74-like factor 1 (ets domain transcription factor)
PROCR	203650_at	0.0137194	5.87166e-05	1.12966	0.175891	1.12966	up	-1.30637	-0.385568	1.30637	down	-1.08503	-0.117733	1.08503	down	-1.32154	-0.402222	1.32154	down	10544	Hs.647450	gb:NM_006404.1 /DB_XREF=gi:5453645 /GEN=PROCR /FEA=FLmRNA /CNT=122 /TID=Hs.82353.0 /TIER=FL+Stack /STK=28 /UG=Hs.82353 /LL=10544 /DEF=Homo sapiens protein C receptor, endothelial (EPCR) (PROCR), mRNA. /PROD=protein C receptor, endothelial (EPCR) /FL=gb:L35545.1 gb:NM_006404.1
YWHAZ	200641_s_at	0.0137993	5.93111e-05	-1.31178	-0.39153	1.31178	down	1.29086	0.368334	1.29086	up	1.02088	0.0298119	1.02088	up	2.32063	1.21452	2.32063	up	7534	Hs.492407	gb:U28964.1 /DB_XREF=gi:899458 /FEA=FLmRNA /CNT=413 /TID=Hs.75103.0 /TIER=FL /STK=1 /UG=Hs.75103 /LL=7534 /UG_GENE=YWHAZ /DEF=Homo sapiens 14-3-3 protein mRNA, complete cds. /PROD=14-3-3 protein /FL=gb:NM_003406.1 gb:U28964.1 gb:BC003623.1 gb:M86400.1
	237077_at	0.0138065	5.95944e-05	-1.2441	-0.3151	1.2441	down	1.97352	0.980773	1.97352	up	1.09438	0.130112	1.09438	up	1.17639	0.234372	1.17639	up		Hs.661385	gb:AI821895 /DB_XREF=gi:5440974 /DB_XREF=nt71d07.x5 /CLONE=IMAGE:1203949 /FEA=EST /CNT=11 /TID=Hs.193481.0 /TIER=ConsEnd /STK=0 /UG=Hs.193481 /UG_TITLE=ESTs
PHF21A	1554153_a_at	0.0138205	6.03884e-05	1.33079	0.412283	1.33079	up	2.13825	1.09643	2.13825	up	1.91297	0.935812	1.91297	up	2.48233	1.31169	2.48233	up	51317	Hs.502458	gb:BC015714.1 /DB_XREF=gi:16041691 /TID=Hs2.106826.2 /CNT=35 /FEA=FLmRNA /TIER=FL /STK=3 /LL=51317 /UG_GENE=BHC80 /UG=Hs.106826 /DEF=Homo sapiens, Similar to KIAA1696 protein, clone MGC:16851 IMAGE:3908900, mRNA, complete cds. /PROD=Similar to KIAA1696 protein /FL=gb:BC015714.1
IQGAP1	210840_s_at	0.0138205	6.05624e-05	1.18428	0.244009	1.18428	up	2.49083	1.31663	2.49083	up	1.79891	0.847124	1.79891	up	1.75299	0.809817	1.75299	up	8826	Hs.430551	gb:D29640.1 /DB_XREF=gi:473930 /GEN=KIAA0051 /FEA=FLmRNA /CNT=2 /TID=Hs.1742.1 /TIER=FL /STK=0 /UG=Hs.1742 /LL=8826 /UG_TITLE=IQ motif containing GTPase activating protein 1 /DEF=Human mRNA for KIAA0051 gene, complete cds. /FL=gb:D29640.1
C5orf22	1552660_a_at	0.0138205	6.07134e-05	1.14444	0.194643	1.14444	up	1.3288	0.410124	1.3288	up	1.01106	0.0158658	1.01106	up	2.38273	1.25262	2.38273	up	55322	Hs.519246	gb:BC021215.1 /DB_XREF=gi:18203780 /TID=Hs2.151046.1 /CNT=29 /FEA=FLmRNA /TIER=FL /STK=1 /LL=55322 /UG_GENE=FLJ11193 /UG=Hs.151046 /DEF=Homo sapiens, clone MGC:12584 IMAGE:4302543, mRNA, complete cds. /PROD=Unknown (protein for MGC:12584) /FL=gb:NM_018356.1 gb:BC021215.1
FBLN1	202995_s_at	0.0138205	6.08792e-05	-1.16266	-0.217427	1.16266	down	-1.05472	-0.076856	1.05472	down	1.32786	0.4091	1.32786	up	-1.05364	-0.0753811	1.05364	down	2192	Hs.24601	gb:NM_006486.1 /DB_XREF=gi:5922008 /GEN=FBLN1 /FEA=FLmRNA /CNT=170 /TID=Hs.79732.0 /TIER=FL /STK=0 /UG=Hs.79732 /LL=2192 /DEF=Homo sapiens fibulin 1 (FBLN1), transcript variant D, mRNA. /PROD=fibulin 1 isoform D /FL=gb:NM_006486.1 gb:U01244.1
TNRC18	226691_at	0.0138205	6.09187e-05	-1.00343	-0.00493765	1.00343	down	1.80763	0.854097	1.80763	up	1.5094	0.593973	1.5094	up	1.60089	0.678873	1.60089	up	84629	Hs.520638	gb:AI936523 /DB_XREF=gi:5675393 /DB_XREF=wd29a03.x1 /CLONE=IMAGE:2329516 /FEA=EST /CNT=42 /TID=Hs.301406.2 /TIER=Stack /STK=26 /UG=Hs.301406 /LL=60369 /UG_GENE=PP3501 /UG_TITLE=hypothetical protein PP3501
GANAB	211934_x_at	0.0138443	6.14325e-05	1.11947	0.162819	1.11947	up	1.04554	0.0642419	1.04554	up	1.46395	0.549864	1.46395	up	1.54178	0.624601	1.54178	up	23193	Hs.595071	gb:W87689 /DB_XREF=gi:1401814 /DB_XREF=zh68c04.s1 /CLONE=IMAGE:417222 /FEA=FLmRNA /CNT=467 /TID=Hs.76847.0 /TIER=Stack /STK=12 /UG=Hs.76847 /LL=23193 /UG_GENE=KIAA0088 /UG_TITLE=KIAA0088 protein /FL=gb:NM_014610.1
RALGAPA2	231826_at	0.0138443	6.15302e-05	-1.26216	-0.335889	1.26216	down	1.10108	0.138916	1.10108	up	1.05108	0.0718699	1.05108	up	1.77001	0.823757	1.77001	up	57186	Hs.472285	gb:AK002211.1 /DB_XREF=gi:7023952 /FEA=mRNA /CNT=41 /TID=Hs.15978.0 /TIER=ConsEnd /STK=0 /UG=Hs.15978 /LL=57186 /UG_GENE=KIAA1272 /UG_TITLE=KIAA1272 protein /DEF=Homo sapiens cDNA FLJ11349 fis, clone PLACE4000650, weakly similar to TUBERIN.
COPG1	217749_at	0.0139634	6.23151e-05	1.14689	0.197727	1.14689	up	2.53913	1.34434	2.53913	up	2.34512	1.22966	2.34512	up	3.25054	1.70068	3.25054	up	22820	Hs.518250	gb:NM_016128.1 /DB_XREF=gi:11559928 /GEN=LOC51137 /FEA=FLmRNA /CNT=266 /TID=Hs.102950.0 /TIER=FL+Stack /STK=75 /UG=Hs.102950 /LL=51137 /DEF=Homo sapiens coat protein gamma-cop (LOC51137), mRNA. /PROD=coat protein gamma-cop /FL=gb:NM_016128.1 gb:AB047846.1 gb:AF100756.1
TFE3	1565347_s_at	0.0140556	6.3858e-05	-1.06869	-0.0958454	1.06869	down	1.36622	0.450186	1.36622	up	1.21435	0.280189	1.21435	up	2.63771	1.39928	2.63771	up	7030	Hs.730740	gb:AY034078.1 /DB_XREF=gi:14334383 /TID=Hs2.433687.1 /CNT=1 /FEA=mRNA /TIER=ConsEnd /STK=0 /UG=Hs.433687 /UG_TITLE=Homo sapiens ASPLTFE3 type 2 fusion protein mRNA, partial cds /DEF=Homo sapiens ASPLTFE3 type 2 fusion protein mRNA, partial cds.
RFWD2	1552617_a_at	0.0140556	6.38824e-05	1.27961	0.35571	1.27961	up	1.87052	0.903437	1.87052	up	1.84593	0.88435	1.84593	up	2.17926	1.12384	2.17926	up	64326	Hs.523744	gb:NM_022457.4 /DB_XREF=gi:21359962 /TID=Hs2.105737.1 /CNT=61 /FEA=FLmRNA /TIER=FL /STK=2 /LL=64326 /UG_GENE=COP1 /UG=Hs.105737 /UG_TITLE=constitutive photomorphogenic protein /DEF=Homo sapiens constitutive photomorphogenic protein (COP1), mRNA. /FL=gb:AF508940.1 gb:NM_022457.4
FNBP1	213940_s_at	0.0140556	6.40366e-05	1.16851	0.224674	1.16851	up	-1.30095	-0.379567	1.30095	down	-2.02982	-1.02135	2.02982	down	-2.0522	-1.03717	2.0522	down	23048	Hs.189409	gb:AU145053 /DB_XREF=gi:11006574 /DB_XREF=AU145053 /CLONE=HEMBA1003755 /FEA=mRNA /CNT=27 /TID=Hs.301763.1 /TIER=Stack /STK=8 /UG=Hs.301763 /LL=23048 /UG_GENE=KIAA0554 /UG_TITLE=KIAA0554 protein
NKD1	232203_at	0.0140556	6.42971e-05	-1.33408	-0.415849	1.33408	down	-1.25791	-0.331032	1.25791	down	-1.45149	-0.537535	1.45149	down	-1.41805	-0.503908	1.41805	down	85407	Hs.187578	gb:AA554714 /DB_XREF=gi:2325253 /DB_XREF=nk31b04.s1 /CLONE=IMAGE:1015087 /FEA=mRNA /CNT=13 /TID=Hs.187578.0 /TIER=ConsEnd /STK=3 /UG=Hs.187578 /UG_TITLE=Homo sapiens cDNA FLJ11639 fis, clone HEMBA1004327
PHC2	1557852_at	0.0140556	6.44683e-05	-1.3159	-0.396047	1.3159	down	2.24358	1.1658	2.24358	up	-2.52939	-1.33879	2.52939	down	-1.66945	-0.739373	1.66945	down	1912	Hs.674410	gb:AW418842 /DB_XREF=gi:6946774 /DB_XREF=ha14e10.x1 /CLONE=IMAGE:2873706 /TID=Hs2.256230.1 /CNT=3 /FEA=mRNA /TIER=ConsEnd /STK=1 /UG=Hs.256230 /UG_TITLE=Homo sapiens cDNA FLJ31245 fis, clone KIDNE2005062.
	240839_at	0.0140556	6.45018e-05	-1.2864	-0.363335	1.2864	down	1.20212	0.265583	1.20212	up	-1.29584	-0.373882	1.29584	down	-1.39929	-0.484691	1.39929	down		Hs.112751	gb:AI857558 /DB_XREF=gi:5511174 /DB_XREF=wl58g06.x1 /CLONE=IMAGE:2429146 /FEA=EST /CNT=4 /TID=Hs.227884.0 /TIER=ConsEnd /STK=4 /UG=Hs.227884 /UG_TITLE=ESTs, Weakly similar to ALU5_HUMAN ALU SUBFAMILY SC SEQUENCE CONTAMINATION WARNING ENTRY (H.sapiens)
	240960_at	0.0140556	6.45626e-05	-2.31665	-1.21204	2.31665	down	-1.69423	-0.760633	1.69423	down	-3.27577	-1.71183	3.27577	down	-2.78504	-1.4777	2.78504	down		Hs.729481	gb:AA713522 /DB_XREF=gi:2725796 /DB_XREF=nv67e10.s1 /CLONE=IMAGE:1234890 /FEA=EST /CNT=7 /TID=Hs.87752.0 /TIER=ConsEnd /STK=4 /UG=Hs.87752 /UG_TITLE=ESTs
PCYT1A	204210_s_at	0.0140556	6.48717e-05	1.19625	0.258514	1.19625	up	1.32656	0.407688	1.32656	up	1.48595	0.571389	1.48595	up	1.63304	0.707564	1.63304	up	5130	Hs.135997	gb:NM_005017.1 /DB_XREF=gi:4826887 /GEN=PCYT1A /FEA=FLmRNA /CNT=68 /TID=Hs.273558.0 /TIER=FL /STK=0 /UG=Hs.273558 /LL=5130 /DEF=Homo sapiens phosphate cytidylyltransferase 1, choline, alpha isoform (PCYT1A), mRNA. /PROD=phosphate cytidylyltransferase 1, choline, alphaisoform /FL=gb:L28957.1 gb:NM_005017.1
MEDAG	1565765_x_at	0.0140556	6.5352e-05	-1.11714	-0.159813	1.11714	down	-1.08715	-0.120555	1.08715	down	-1.2382	-0.308248	1.2382	down	-1.50363	-0.588451	1.50363	down	84935	Hs.147880	gb:AL832478.1 /DB_XREF=gi:21733046 /TID=Hs2.377494.1 /CNT=4 /FEA=mRNA /TIER=ConsEnd /STK=0 /UG=Hs.377494 /UG_TITLE=Homo sapiens mRNA; cDNA DKFZp686E1619 (from clone DKFZp686E1619) /DEF=Homo sapiens mRNA; cDNA DKFZp686E1619 (from clone DKFZp686E1619).
PIP5K1A	211205_x_at	0.0140556	6.56129e-05	-1.39817	-0.483538	1.39817	down	-1.53348	-0.616807	1.53348	down	-1.15339	-0.205883	1.15339	down	1.10167	0.139692	1.10167	up	8394	Hs.655131	gb:U78577.1 /DB_XREF=gi:1743874 /FEA=FLmRNA /CNT=1 /TID=Hs.149255.2 /TIER=FL /STK=0 /UG=Hs.149255 /LL=8394 /UG_GENE=PIP5K1A /DEF=Human 68 kDa type I phosphatidylinositol-4-phosphate 5-kinase alpha mRNA, clone PIP5KIa3, complete cds. /PROD=68 kDa type I phosphatidylinositol-4-phosphate5-kinase alpha /FL=gb:U78577.1
COX5A	203663_s_at	0.0140556	6.57677e-05	1.07868	0.109265	1.07868	up	-1.53346	-0.616786	1.53346	down	-1.52319	-0.607098	1.52319	down	-1.34406	-0.426602	1.34406	down	9377	Hs.401903	gb:NM_004255.1 /DB_XREF=gi:4758037 /GEN=COX5A /FEA=FLmRNA /CNT=142 /TID=Hs.181028.0 /TIER=FL+Stack /STK=87 /UG=Hs.181028 /LL=9377 /DEF=Homo sapiens cytochrome c oxidase subunit Va (COX5A), mRNA. /PROD=cytochrome c oxidase subunit Va /FL=gb:NM_004255.1 gb:M22760.1
PRUNE	232490_s_at	0.0140556	6.58112e-05	-1.18407	-0.24376	1.18407	down	1.32521	0.406226	1.32521	up	-1.07529	-0.104727	1.07529	down	1.92899	0.947849	1.92899	up	58497	Hs.78524	gb:U67085.1 /DB_XREF=gi:6175242 /GEN=HTcD37 /FEA=mRNA /CNT=6 /TID=Hs.78524.2 /TIER=ConsEnd /STK=0 /UG=Hs.78524 /LL=58497 /DEF=Human TcD37 homolog (HTcD37) mRNA, partial cds. /PROD=TcD37 homolog
SRSF3	232392_at	0.0140804	6.61847e-05	-1.47997	-0.565563	1.47997	down	-3.64676	-1.86661	3.64676	down	-3.16958	-1.66429	3.16958	down	-3.53525	-1.82181	3.53525	down	6428	Hs.405144	gb:BE927772 /DB_XREF=gi:10453848 /DB_XREF=MR3-CT0463-170800-001-d01 /FEA=mRNA /CNT=7 /TID=Hs.167460.2 /TIER=ConsEnd /STK=0 /UG=Hs.167460 /LL=6428 /UG_GENE=SFRS3 /UG_TITLE=splicing factor, arginineserine-rich 3
CES2	209667_at	0.0140823	6.66394e-05	1.51413	0.598489	1.51413	up	1.12595	0.171143	1.12595	up	1.16689	0.22267	1.16689	up	1.62309	0.69874	1.62309	up	8824	Hs.282975	gb:BF033242 /DB_XREF=gi:10740954 /DB_XREF=601454201F1 /CLONE=IMAGE:3857928 /FEA=FLmRNA /CNT=64 /TID=Hs.282975.0 /TIER=Stack /STK=14 /UG=Hs.282975 /LL=8824 /UG_GENE=CES2 /UG_TITLE=carboxylesterase 2 (intestine, liver) /FL=gb:D50579.1 gb:NM_003869.2 gb:U60553.1
HNRNPUL2///HNRNPUL2-BSCL2	66053_at	0.0140823	6.71943e-05	-1.18109	-0.240117	1.18109	down	1.02434	0.0346937	1.02434	up	-1.06873	-0.0959012	1.06873	down	1.41407	0.499852	1.41407	up	221092///100534595	Hs.657058	Cluster Incl. AI738452:wi32a07.x1 Homo sapiens cDNA, 3 end /clone=IMAGE-2391924 /clone_end=3' /gb=AI738452 /gi=5100433 /ug=Hs.203286 /len=533
CANX	200068_s_at	0.0140823	6.73331e-05	1.10835	0.148415	1.10835	up	1.40694	0.492557	1.40694	up	1.39481	0.480071	1.39481	up	1.63552	0.709752	1.63552	up	821	Hs.567968	gb:M94859.1 /DB_XREF=gi:179831 /FEA=FLmRNA /CNT=288 /TID=Hs.155560.0 /TIER=FL+Stack /STK=21 /UG=Hs.155560 /LL=821 /UG_GENE=CANX /DEF=Human calnexin mRNA, complete cds. /PROD=calnexin /FL=gb:L18887.1 gb:L10284.1 gb:M94859.1 gb:NM_001746.1 gb:BC003552.1 gb:M98452.1
SORT1	212797_at	0.0140823	6.73595e-05	-1.01371	-0.0196384	1.01371	down	1.60702	0.68439	1.60702	up	1.04381	0.0618638	1.04381	up	3.15775	1.6589	3.15775	up	6272	Hs.485195	gb:BE742268 /DB_XREF=gi:10156260 /DB_XREF=601575686F1 /CLONE=IMAGE:3836709 /FEA=EST /CNT=86 /TID=Hs.281706.1 /TIER=ConsEnd /STK=0 /UG=Hs.281706 /LL=6272 /UG_GENE=SORT1 /UG_TITLE=sortilin 1
SLC27A1	226728_at	0.0140823	6.74817e-05	1.26013	0.333573	1.26013	up	1.91851	0.939989	1.91851	up	2.51614	1.33121	2.51614	up	2.17549	1.12134	2.17549	up	376497	Hs.363138	gb:BF056007 /DB_XREF=gi:10809903 /DB_XREF=7k07c10.x1 /CLONE=IMAGE:3443706 /FEA=EST /CNT=42 /TID=Hs.17567.0 /TIER=Stack /STK=27 /UG=Hs.17567 /UG_TITLE=ESTs
	235894_at	0.0141123	6.78837e-05	-1.2257	-0.293606	1.2257	down	1.08168	0.113278	1.08168	up	-1.31121	-0.390899	1.31121	down	-1.61455	-0.691133	1.61455	down		Hs.662796	gb:AW444899 /DB_XREF=gi:6986661 /DB_XREF=UI-H-BI3-ajz-d-07-0-UI.s1 /CLONE=IMAGE:2733373 /FEA=EST /CNT=10 /TID=Hs.99665.0 /TIER=ConsEnd /STK=7 /UG=Hs.99665 /UG_TITLE=ESTs
CACNA2D4	1552690_a_at	0.014228	6.87002e-05	-1.05628	-0.0789964	1.05628	down	1.05621	0.0788944	1.05621	up	1.58096	0.660804	1.58096	up	1.53455	0.617816	1.53455	up	93589	Hs.13768	gb:NM_172364.1 /DB_XREF=gi:27312024 /GEN=CACNA2D4 /TID=Hs2.13768.1 /CNT=14 /FEA=FLmRNA /TIER=FL /STK=2 /LL=93589 /UG=Hs.13768 /DEF=Homo sapiens calcium channel, voltage-dependent, alpha 2delta subunit 4 (CACNA2D4), mRNA. /PROD=voltage-gated calcium channel alpha(2)delta-4subunit /FL=gb:AF516695.1 gb:NM_172364.1
C5orf56	230405_at	0.0142532	6.90829e-05	-1.01919	-0.0274242	1.01919	down	-2.6847	-1.42476	2.6847	down	-1.75294	-0.809773	1.75294	down	-2.65751	-1.41007	2.65751	down	441108	Hs.658288	gb:AI143416 /DB_XREF=gi:3665225 /DB_XREF=qa55a10.s1 /CLONE=IMAGE:1690650 /FEA=EST /CNT=13 /TID=Hs.41587.4 /TIER=Stack /STK=12 /UG=Hs.41587 /LL=10111 /UG_GENE=RAD50 /UG_TITLE=RAD50 (S. cerevisiae) homolog
BRD7	222737_s_at	0.0143381	6.97566e-05	-1.50113	-0.586048	1.50113	down	-1.40441	-0.489967	1.40441	down	-2.4362	-1.28463	2.4362	down	-1.53322	-0.616566	1.53322	down	29117	Hs.437894	gb:AI674162 /DB_XREF=gi:4874642 /DB_XREF=wc09a09.x1 /CLONE=IMAGE:2314648 /FEA=FLmRNA /CNT=60 /TID=Hs.279762.0 /TIER=Stack /STK=15 /UG=Hs.279762 /LL=29117 /UG_GENE=BRD7 /UG_TITLE=bromodomain-containing 7 /FL=gb:NM_013263.1 gb:AF152604.1 gb:AF213969.1
DENND2A	221885_at	0.0143471	7.0295e-05	1.06017	0.0842928	1.06017	up	-1.53614	-0.619313	1.53614	down	1.25313	0.325536	1.25313	up	-1.15492	-0.207796	1.15492	down	27147	Hs.6385	gb:AI131051 /DB_XREF=gi:3601067 /DB_XREF=qb82h09.x1 /CLONE=IMAGE:1706657 /FEA=mRNA /CNT=60 /TID=Hs.6385.0 /TIER=Stack /STK=34 /UG=Hs.6385 /LL=27147 /UG_GENE=KIAA1277 /UG_TITLE=KIAA1277 protein
PRRC1	221734_at	0.0143471	7.03252e-05	-1.15395	-0.206582	1.15395	down	-1.05512	-0.0774066	1.05512	down	-2.20914	-1.14349	2.20914	down	-1.35778	-0.441247	1.35778	down	133619	Hs.483259	gb:BE328312 /DB_XREF=gi:9202173 /DB_XREF=hs95d12.x1 /CLONE=IMAGE:3144983 /FEA=EST /CNT=221 /TID=Hs.6614.0 /TIER=Stack /STK=36 /UG=Hs.6614 /UG_TITLE=ESTs, Weakly similar to A43932 mucin 2 precursor, intestinal (H.sapiens)
CCDC93	243282_at	0.0143604	7.06529e-05	-1.15716	-0.210585	1.15716	down	1.32662	0.407754	1.32662	up	-1.07554	-0.105065	1.07554	down	-1.13032	-0.176731	1.13032	down	54520		gb:AA504256 /DB_XREF=gi:2240416 /DB_XREF=aa61b04.s1 /CLONE=IMAGE:825391 /FEA=EST /CNT=5 /TID=Hs.194426.0 /TIER=ConsEnd /STK=3 /UG=Hs.194426 /UG_TITLE=ESTs
SNX27	221006_s_at	0.0147724	7.29501e-05	1.03788	0.0536418	1.03788	up	3.49408	1.80491	3.49408	up	1.43871	0.524774	1.43871	up	1.91673	0.93865	1.91673	up	81609	Hs.192326	gb:NM_030918.1 /DB_XREF=gi:13569876 /GEN=MY014 /FEA=FLmRNA /CNT=1 /TID=HsAffx.900113.28 /TIER=FL /STK=0 /DEF=Homo sapiens hypothetical protein My014 (MY014), mRNA. /PROD=hypothetical protein My014 /FL=gb:NM_030918.1
GTF2F1	202354_s_at	0.0148042	7.35698e-05	-1.00593	-0.00853109	1.00593	down	1.06016	0.0842829	1.06016	up	1.01118	0.0160348	1.01118	up	1.79808	0.846456	1.79808	up	2962	Hs.68257	gb:AW190445 /DB_XREF=gi:6464925 /DB_XREF=xl15c01.x1 /CLONE=IMAGE:2676288 /FEA=FLmRNA /CNT=120 /TID=Hs.68257.0 /TIER=Stack /STK=8 /UG=Hs.68257 /LL=2962 /UG_GENE=GTF2F1 /UG_TITLE=general transcription factor IIF, polypeptide 1 (74kD subunit) /FL=gb:NM_002096.1 gb:BC000120.1
IL17RA	205707_at	0.0148042	7.3703e-05	1.13894	0.187692	1.13894	up	3.35606	1.74677	3.35606	up	1.9387	0.955092	1.9387	up	2.50946	1.32738	2.50946	up	23765	Hs.48353	gb:NM_014339.1 /DB_XREF=gi:7657229 /GEN=IL17R /FEA=FLmRNA /CNT=23 /TID=Hs.129751.0 /TIER=FL /STK=0 /UG=Hs.129751 /LL=23765 /DEF=Homo sapiens interleukin 17 receptor (IL17R), mRNA. /PROD=interleukin 17 receptor /FL=gb:U58917.1 gb:NM_014339.1
PRELID3B	229835_s_at	0.0148042	7.39196e-05	1.13457	0.182145	1.13457	up	-2.23112	-1.15777	2.23112	down	-2.18007	-1.12437	2.18007	down	-2.6658	-1.41457	2.6658	down	51012	Hs.656865	gb:AA004210 /DB_XREF=gi:1448405 /DB_XREF=zh97c04.s1 /CLONE=IMAGE:429222 /FEA=EST /CNT=17 /TID=Hs.3945.1 /TIER=Stack /STK=12 /UG=Hs.3945 /LL=51012 /UG_GENE=LOC51012 /UG_TITLE=CGI-107 protein
IFI44	214453_s_at	0.0149655	7.51547e-05	1.43757	0.523632	1.43757	up	-10.4556	-3.3862	10.4556	down	-6.57673	-2.71737	6.57673	down	-6.28509	-2.65193	6.28509	down	10561	Hs.82316	gb:NM_006417.1 /DB_XREF=gi:5453743 /GEN=MTAP44 /FEA=FLmRNA /CNT=17 /TID=Hs.82316.2 /TIER=FL /STK=1 /UG=Hs.82316 /LL=10561 /DEF=Homo sapiens interferon-induced, hepatitis C-associated microtubular aggregate protein (44kD) (MTAP44), mRNA. /PROD=interferon-induced, hepatitis C-associatedmicrotubular aggregate protein (44kD) /FL=gb:NM_006417.1
PAK2	208877_at	0.0149655	7.52722e-05	1.30731	0.386599	1.30731	up	2.20716	1.14219	2.20716	up	2.00818	1.00589	2.00818	up	1.75061	0.807854	1.75061	up	5062	Hs.518530	gb:W74494 /DB_XREF=gi:1384781 /DB_XREF=zd75f10.s1 /CLONE=IMAGE:346507 /FEA=FLmRNA /CNT=244 /TID=Hs.284275.0 /TIER=Stack /STK=40 /UG=Hs.284275 /UG_TITLE=Homo sapiens PAK2 mRNA, complete cds /FL=gb:AF092132.1
JAK3	211108_s_at	0.0150316	7.58795e-05	1.08907	0.123099	1.08907	up	1.28349	0.360077	1.28349	up	-1.04238	-0.0598824	1.04238	down	2.97522	1.57299	2.97522	up	3718	Hs.515247	gb:U31601.1 /DB_XREF=gi:1039418 /GEN=Jak3B /FEA=FLmRNA /CNT=1 /TID=Hs.99877.1 /TIER=FL /STK=0 /UG=Hs.99877 /LL=3718 /DEF=Human tyrosine protein kinase (Jak3B) splice variant mRNA, complete cds. /PROD=JAK3B /FL=gb:U31601.1
MAP3K3	243505_at	0.0150399	7.61968e-05	-1.16198	-0.21658	1.16198	down	1.57386	0.654309	1.57386	up	-1.25857	-0.331783	1.25857	down	-1.22763	-0.295873	1.22763	down	4215		gb:AI937121 /DB_XREF=gi:5675991 /DB_XREF=wp73d02.x1 /CLONE=IMAGE:2467395 /FEA=EST /CNT=4 /TID=Hs.216797.0 /TIER=ConsEnd /STK=3 /UG=Hs.216797 /UG_TITLE=ESTs
GNLY	205495_s_at	0.0150925	7.67391e-05	1.19258	0.254082	1.19258	up	-5.4541	-2.44734	5.4541	down	-1.98535	-0.989391	1.98535	down	-4.14544	-2.05152	4.14544	down	10578	Hs.105806	gb:NM_006433.2 /DB_XREF=gi:7108343 /GEN=GNLY /FEA=FLmRNA /CNT=32 /TID=Hs.105806.1 /TIER=FL+Stack /STK=18 /UG=Hs.105806 /LL=10578 /DEF=Homo sapiens granulysin (GNLY), transcript variant NKG5, mRNA. /PROD=granulysin, isoform NKG5 /FL=gb:NM_006433.2
ENO1	217294_s_at	0.0155123	7.92749e-05	-1.25688	-0.329848	1.25688	down	1.28839	0.365564	1.28839	up	-1.0427	-0.0603254	1.0427	down	2.03348	1.02395	2.03348	up	2023	Hs.517145	gb:U88968.1 /DB_XREF=gi:3282242 /GEN=ENO1L1 /FEA=mRNA /CNT=1 /TID=Hs.254105.1 /TIER=ConsEnd /STK=0 /UG=Hs.254105 /LL=2023 /DEF=Human alpha enolase like 1 (ENO1L1) mRNA, partial cds. /PROD=alpha enolase like 1
	AFFX-hum_alu_at	0.0155123	7.94974e-05	1.0003	0.000426065	1.0003	up	1.03177	0.0451149	1.03177	up	-1.04269	-0.060308	1.04269	down	-1.1809	-0.239886	1.1809	down			H. sapiens /GEN=Alu-Sq /DB_XREF=gb:U14573.1 /NOTE=SIF corresponding to nucleotides 11-278 of gb:U14573.1, not 100% identical /DEF=Human Alu-Sq subfamily consensus sequence.
SYPL1	201259_s_at	0.0155123	7.97251e-05	-1.03552	-0.0503568	1.03552	down	-1.10373	-0.142392	1.10373	down	-1.12661	-0.171986	1.12661	down	1.47403	0.559766	1.47403	up	6856	Hs.80919	gb:AI768845 /DB_XREF=gi:5235354 /DB_XREF=wj12e10.x1 /CLONE=IMAGE:2402634 /FEA=FLmRNA /CNT=332 /TID=Hs.80919.0 /TIER=Stack /STK=23 /UG=Hs.80919 /LL=6856 /UG_GENE=SYPL /UG_TITLE=synaptophysin-like protein /FL=gb:NM_006754.1
RNASEH2C	226453_at	0.0156769	8.08575e-05	-1.36229	-0.446037	1.36229	down	-1.46943	-0.555252	1.46943	down	-1.41473	-0.500524	1.41473	down	-1.19024	-0.251254	1.19024	down	84153	Hs.718438	gb:BF982002 /DB_XREF=gi:12384814 /DB_XREF=602306176F1 /CLONE=IMAGE:4397610 /FEA=mRNA /CNT=52 /TID=Hs.6364.3 /TIER=Stack /STK=25 /UG=Hs.6364 /LL=10524 /UG_GENE=HTATIP /UG_TITLE=HIV-1 Tat interactive protein, 60 kDa
CDK14	204604_at	0.0157058	8.1602e-05	1.20452	0.268462	1.20452	up	1.91145	0.934667	1.91145	up	1.61062	0.687612	1.61062	up	1.83928	0.879144	1.83928	up	5218	Hs.258576	gb:NM_012395.1 /DB_XREF=gi:6912583 /GEN=PFTK1 /FEA=FLmRNA /CNT=63 /TID=Hs.57856.0 /TIER=FL+Stack /STK=12 /UG=Hs.57856 /LL=5218 /DEF=Homo sapiens PFTAIRE protein kinase 1 (PFTK1), mRNA. /PROD=PFTAIRE protein kinase 1 /FL=gb:NM_012395.1 gb:AB020641.1
TOR2A	227972_at	0.0157058	8.20353e-05	1.2685	0.343125	1.2685	up	1.35672	0.440127	1.35672	up	1.36977	0.45393	1.36977	up	1.75505	0.811516	1.75505	up	27433	Hs.444106	gb:AA873275 /DB_XREF=gi:2969397 /DB_XREF=oh68f11.s1 /CLONE=IMAGE:1472205 /FEA=EST /CNT=28 /TID=Hs.59038.0 /TIER=Stack /STK=19 /UG=Hs.59038 /LL=27433 /UG_GENE=TOR2A /UG_TITLE=torsin family 2, member A
UBE2H	221962_s_at	0.0157058	8.22072e-05	-1.30292	-0.381745	1.30292	down	1.06987	0.0974386	1.06987	up	-1.73576	-0.795571	1.73576	down	1.52274	0.60667	1.52274	up	7328	Hs.643548	gb:AI829920 /DB_XREF=gi:5450591 /DB_XREF=wj47d11.x1 /CLONE=IMAGE:2405973 /FEA=EST /CNT=34 /TID=Hs.28505.2 /TIER=ConsEnd /STK=0 /UG=Hs.28505 /LL=7328 /UG_GENE=UBE2H /UG_TITLE=ubiquitin-conjugating enzyme E2H (homologous to yeast UBC8)
MED19	226293_at	0.0157058	8.24842e-05	-1.28843	-0.365609	1.28843	down	-1.19653	-0.258851	1.19653	down	-1.93257	-0.950517	1.93257	down	-1.29024	-0.367636	1.29024	down	219541	Hs.43619	gb:BE781103 /DB_XREF=gi:10202301 /DB_XREF=601469283F1 /CLONE=IMAGE:3872277 /FEA=EST /CNT=73 /TID=Hs.43619.0 /TIER=Stack /STK=11 /UG=Hs.43619 /UG_TITLE=ESTs
CNNM2	209874_x_at	0.0157058	8.25119e-05	-1.17186	-0.228805	1.17186	down	1.24772	0.319299	1.24772	up	1.32679	0.407935	1.32679	up	1.03699	0.0523973	1.03699	up	54805	Hs.643509	gb:AF216962.1 /DB_XREF=gi:9280369 /GEN=ACDP2 /FEA=FLmRNA /CNT=51 /TID=Hs.271221.1 /TIER=FL /STK=1 /UG=Hs.271221 /LL=54805 /DEF=Homo sapiens ancient conserved domain protein 2 (ACDP2) mRNA, complete cds. /PROD=ancient conserved domain protein 2 /FL=gb:AF216962.1
PNRC2	222406_s_at	0.0157058	8.27302e-05	-1.03863	-0.0546879	1.03863	down	-1.97826	-0.98423	1.97826	down	-3.43163	-1.77889	3.43163	down	-1.46355	-0.549474	1.46355	down	55629	Hs.512636///Hs.7862	gb:AV738970 /DB_XREF=gi:10856551 /DB_XREF=AV738970 /CLONE=CBFAOF06 /FEA=FLmRNA /CNT=257 /TID=Hs.7862.0 /TIER=Stack /STK=8 /UG=Hs.7862 /LL=55629 /UG_GENE=FLJ20312 /UG_TITLE=hypothetical protein FLJ20312 /FL=gb:NM_017761.1 gb:AF151042.1 gb:BC001959.1
CBL	225234_at	0.0160614	8.48971e-05	-1.00897	-0.01289	1.00897	down	2.44146	1.28774	2.44146	up	1.309	0.388466	1.309	up	1.05452	0.076585	1.05452	up	867	Hs.504096	gb:AV710415 /DB_XREF=gi:10729044 /DB_XREF=AV710415 /CLONE=CuAAND10 /FEA=EST /CNT=101 /TID=Hs.90960.0 /TIER=Stack /STK=32 /UG=Hs.90960 /UG_TITLE=ESTs
BICD2	209203_s_at	0.0162321	8.60964e-05	-1.05507	-0.0773344	1.05507	down	2.11748	1.08235	2.11748	up	-1.43779	-0.523855	1.43779	down	1.28375	0.360365	1.28375	up	23299	Hs.436939	gb:BC002327.1 /DB_XREF=gi:12803052 /FEA=FLmRNA /CNT=148 /TID=Hs.17411.0 /TIER=FL /STK=0 /UG=Hs.17411 /LL=23299 /UG_GENE=KIAA0699 /DEF=Homo sapiens, ribosomal protein L30, clone MGC:2797, mRNA, complete cds. /PROD=ribosomal protein L30 /FL=gb:BC002327.1
PDAP1	202290_at	0.0162385	8.64394e-05	-1.14742	-0.198388	1.14742	down	-1.6519	-0.724124	1.6519	down	-1.04915	-0.0692246	1.04915	down	1.14705	0.197931	1.14705	up	11333	Hs.632296	gb:NM_014891.1 /DB_XREF=gi:7657440 /GEN=HASPP28 /FEA=FLmRNA /CNT=179 /TID=Hs.278426.0 /TIER=FL /STK=0 /UG=Hs.278426 /LL=11333 /DEF=Homo sapiens PDGF associated protein (HASPP28), mRNA. /PROD=PDGF associated protein /FL=gb:BC000684.1 gb:NM_014891.1 gb:U41745.1
USP1	202412_s_at	0.0162385	8.67243e-05	-1.14607	-0.196698	1.14607	down	-1.14707	-0.197953	1.14707	down	-3.89272	-1.96078	3.89272	down	-1.43802	-0.52408	1.43802	down	7398	Hs.35086	gb:AW499935 /DB_XREF=gi:7112073 /DB_XREF=UI-HF-BN0-akf-f-02-0-UI.r1 /CLONE=IMAGE:3077114 /FEA=FLmRNA /CNT=157 /TID=Hs.35086.0 /TIER=Stack /STK=13 /UG=Hs.35086 /LL=7398 /UG_GENE=USP1 /UG_TITLE=ubiquitin specific protease 1 /FL=gb:AL117575.1 gb:NM_003368.1 gb:AB014458.1 gb:AF117386.1
	207688_s_at	0.0162534	8.71009e-05	1.41974	0.505623	1.41974	up	-1.60217	-0.680031	1.60217	down	-2.06739	-1.04781	2.06739	down	-2.06827	-1.04842	2.06827	down			gb:NM_005538.1 /DB_XREF=gi:5031794 /GEN=INHBC /FEA=FLmRNA /CNT=3 /TID=Hs.199538.0 /TIER=FL /STK=0 /UG=Hs.199538 /LL=3626 /DEF=Homo sapiens inhibin, beta C (INHBC), mRNA. /PROD=inhibin beta C subunit precursor /FL=gb:NM_005538.1
ATPIF1	218671_s_at	0.0162761	8.76702e-05	1.20484	0.268845	1.20484	up	-1.8398	-0.879553	1.8398	down	-1.45583	-0.541843	1.45583	down	-1.51861	-0.602755	1.51861	down	93974	Hs.744914	gb:NM_016311.1 /DB_XREF=gi:7705926 /GEN=LOC51189 /FEA=FLmRNA /CNT=95 /TID=Hs.241336.0 /TIER=FL /STK=0 /UG=Hs.241336 /LL=51189 /DEF=Homo sapiens ATPase inhibitor precursor (LOC51189), mRNA. /PROD=ATPase inhibitor precursor /FL=gb:NM_016311.1 gb:BC004955.1 gb:AB029042.1
	233133_at	0.0162761	8.91754e-05	1.13232	0.179285	1.13232	up	1.01378	0.0197484	1.01378	up	-1.07212	-0.100461	1.07212	down	-1.04431	-0.0625547	1.04431	down		Hs.672790	gb:AF131772.1 /DB_XREF=gi:4406596 /FEA=mRNA /CNT=12 /TID=Hs.20945.0 /TIER=ConsEnd /STK=4 /UG=Hs.20945 /UG_TITLE=Homo sapiens clone 24993 mRNA sequence /DEF=Homo sapiens clone 24993 mRNA sequence.
	242875_at	0.0162761	8.92545e-05	-1.47923	-0.564844	1.47923	down	1.38819	0.47321	1.38819	up	-1.38162	-0.466363	1.38162	down	-1.69663	-0.762671	1.69663	down		Hs.666795	gb:AI659439 /DB_XREF=gi:4763009 /DB_XREF=tu30c12.x1 /CLONE=IMAGE:2252566 /FEA=EST /CNT=4 /TID=Hs.166941.0 /TIER=ConsEnd /STK=3 /UG=Hs.166941 /UG_TITLE=ESTs
	1562899_at	0.0162761	8.94328e-05	-1.32309	-0.403911	1.32309	down	1.23209	0.301109	1.23209	up	-1.02191	-0.0312656	1.02191	down	-1.03927	-0.055569	1.03927	down		Hs.680637	gb:BC015844.1 /DB_XREF=gi:16198387 /TID=Hs2.350962.1 /CNT=2 /FEA=mRNA /TIER=ConsEnd /STK=0 /UG=Hs.350962 /UG_TITLE=Homo sapiens, clone IMAGE:4338306, mRNA /DEF=Homo sapiens, clone IMAGE:4338306, mRNA.
C1GALT1	226107_at	0.0162761	8.96221e-05	-1.55177	-0.633916	1.55177	down	-1.49988	-0.584847	1.49988	down	-3.63082	-1.86029	3.63082	down	-2.22971	-1.15686	2.22971	down	56913	Hs.239666	gb:AU156755 /DB_XREF=gi:11018276 /DB_XREF=AU156755 /CLONE=PLACE1004425 /FEA=mRNA /CNT=71 /TID=Hs.239666.0 /TIER=Stack /STK=14 /UG=Hs.239666 /UG_TITLE=Homo sapiens cDNA FLJ13495 fis, clone PLACE1004425
UNC13D	228352_at	0.0162761	8.96241e-05	-1.14181	-0.191318	1.14181	down	1.53066	0.61415	1.53066	up	1.24184	0.312474	1.24184	up	2.32348	1.21629	2.32348	up	201294	Hs.41045	gb:AW189167 /DB_XREF=gi:6463603 /DB_XREF=xl02b05.x1 /CLONE=IMAGE:2675025 /FEA=mRNA /CNT=28 /TID=Hs.41045.0 /TIER=Stack /STK=18 /UG=Hs.41045 /UG_TITLE=Homo sapiens mRNA for FLJ00067 protein, partial cds
PRDX5	1560587_s_at	0.0162761	8.96387e-05	-1.11103	-0.151903	1.11103	down	1.68126	0.749543	1.68126	up	1.41836	0.504227	1.41836	up	1.92094	0.941816	1.92094	up	25824	Hs.502823	gb:AI718223 /DB_XREF=gi:5035414 /DB_XREF=as42c12.x1 /CLONE=IMAGE:2319862 /TID=Hs2.412877.1 /CNT=3 /FEA=mRNA /TIER=ConsEnd /STK=0 /UG=Hs.412877 /UG_TITLE=Human mRNA downregulated in adenovirus 5-infected cells
PACSIN2	1554691_a_at	0.0162761	8.9754e-05	1.03835	0.0542935	1.03835	up	1.47822	0.563862	1.47822	up	1.28897	0.366221	1.28897	up	2.0677	1.04803	2.0677	up	11252	Hs.162877	gb:BC008037.1 /DB_XREF=gi:14165479 /TID=Hs2.18842.3 /CNT=6 /FEA=FLmRNA /TIER=FL /STK=1 /LL=11252 /UG_GENE=PACSIN2 /UG=Hs.18842 /DEF=Homo sapiens, clone MGC:1214 IMAGE:2967052, mRNA, complete cds. /PROD=Unknown (protein for MGC:1214) /FL=gb:BC008037.1
KIAA0930	212421_at	0.0162761	9.00499e-05	1.07432	0.103422	1.07432	up	2.13659	1.09531	2.13659	up	1.98512	0.989229	1.98512	up	1.96654	0.975661	1.96654	up	23313	Hs.592207	gb:AB023147.1 /DB_XREF=gi:4589503 /GEN=KIAA0930 /FEA=mRNA /CNT=143 /TID=Hs.13255.0 /TIER=ConsEnd /STK=4 /UG=Hs.13255 /LL=23313 /DEF=Homo sapiens mRNA for KIAA0930 protein, partial cds. /PROD=KIAA0930 protein
	230984_s_at	0.0162761	9.01997e-05	1.04958	0.0698184	1.04958	up	-1.18386	-0.243496	1.18386	down	-1.04128	-0.0583527	1.04128	down	-1.25129	-0.323416	1.25129	down		Hs.527213	gb:AI857412 /DB_XREF=gi:5511028 /DB_XREF=wl55h05.x1 /CLONE=IMAGE:2428857 /FEA=EST /CNT=17 /TID=Hs.150391.0 /TIER=Stack /STK=14 /UG=Hs.150391 /UG_TITLE=ESTs
RPN1	201011_at	0.0165492	9.30236e-05	1.13549	0.183314	1.13549	up	1.90813	0.932161	1.90813	up	1.9993	0.999494	1.9993	up	2.52139	1.33422	2.52139	up	6184	Hs.518244	gb:NM_002950.1 /DB_XREF=gi:4506674 /GEN=RPN1 /FEA=FLmRNA /CNT=337 /TID=Hs.2280.0 /TIER=FL+Stack /STK=40 /UG=Hs.2280 /LL=6184 /DEF=Homo sapiens ribophorin I (RPN1), mRNA. /PROD=ribophorin I /FL=gb:NM_002950.1
NUCKS1	226880_at	0.0165492	9.30358e-05	1.11771	0.160545	1.11771	up	-4.35162	-2.12155	4.35162	down	-2.33508	-1.22347	2.33508	down	-2.37511	-1.248	2.37511	down	64710	Hs.213061	gb:AL035851 /DB_XREF=gi:5405486 /DB_XREF=DKFZp564N1578_r1 /CLONE=DKFZp564N1578 /FEA=EST /CNT=41 /TID=Hs.118064.1 /TIER=Stack /STK=24 /UG=Hs.118064 /LL=64710 /UG_GENE=NUCKS /UG_TITLE=similar to rat nuclear ubiquitous casein kinase 2
GNLY	37145_at	0.0165492	9.32293e-05	1.21995	0.286824	1.21995	up	-5.00588	-2.32362	5.00588	down	-1.73274	-0.793056	1.73274	down	-3.8407	-1.94137	3.8407	down	10578	Hs.105806	Cluster Incl. M85276:Homo sapiens NKG5 gene, complete cds /cds=(128,565) /gb=M85276 /gi=189229 /ug=Hs.105806 /len=738
CAMK2G	214322_at	0.0165492	9.32621e-05	1.16014	0.214297	1.16014	up	2.9376	1.55464	2.9376	up	2.24314	1.16552	2.24314	up	1.53208	0.615492	1.53208	up	818	Hs.523045	gb:AA284757 /DB_XREF=gi:1927298 /DB_XREF=zt21h01.s1 /CLONE=IMAGE:713809 /FEA=EST /CNT=16 /TID=Hs.250857.2 /TIER=Stack /STK=10 /UG=Hs.250857 /LL=818 /UG_GENE=CAMK2G /UG_TITLE=calciumcalmodulin-dependent protein kinase (CaM kinase) II gamma
SERINC3	211769_x_at	0.0165492	9.37247e-05	1.10335	0.141891	1.10335	up	2.17343	1.11997	2.17343	up	-1.15222	-0.20441	1.15222	down	1.19743	0.259939	1.19743	up	10955	Hs.272168	gb:BC006088.1 /DB_XREF=gi:13543883 /FEA=FLmRNA /CNT=1 /TID=HsAffx.900836.673 /TIER=FL /STK=0 /DEF=Homo sapiens, tumor differentially expressed 1, clone MGC:12658, mRNA, complete cds. /PROD=tumor differentially expressed 1 /FL=gb:BC006088.1
LRRIQ1	223817_at	0.0165492	9.37818e-05	-1.01046	-0.0150169	1.01046	down	1.23143	0.300339	1.23143	up	1.1134	0.154975	1.1134	up	-1.06192	-0.0866794	1.06192	down	84125		gb:BC005399.1 /DB_XREF=gi:13529289 /FEA=FLmRNA /CNT=9 /TID=Hs.196563.0 /TIER=FL /STK=0 /UG=Hs.196563 /DEF=Homo sapiens, clone MGC:12539, mRNA, complete cds. /PROD=Unknown (protein for MGC:12539) /FL=gb:BC005399.1
CNST	1554660_a_at	0.0165492	9.38729e-05	1.01053	0.0151156	1.01053	up	-2.93959	-1.55562	2.93959	down	-2.40408	-1.26548	2.40408	down	-1.68567	-0.753321	1.68567	down	163882	Hs.368353	gb:BC036200.1 /DB_XREF=gi:23274135 /TID=Hs2.288742.2 /CNT=5 /FEA=FLmRNA /TIER=FL /STK=1 /LL=163882 /UG_GENE=FLJ32001 /UG=Hs.288742 /DEF=Homo sapiens, Similar to hypothetical protein FLJ32001, clone MGC:39559 IMAGE:4828136, mRNA, complete cds. /PROD=Similar to hypothetical protein FLJ32001 /FL=gb:BC036200.1
LRRC41	1555831_s_at	0.0165492	9.41346e-05	1.02866	0.0407722	1.02866	up	1.34873	0.431604	1.34873	up	1.46479	0.55069	1.46479	up	2.1457	1.10145	2.1457	up	10489	Hs.144941	gb:BC004948.1 /DB_XREF=gi:13436313 /TID=Hs2Affx.1.474 /CNT=1 /FEA=FLmRNA /TIER=ConsEnd /STK=0 /NOTE=sequence(s) not in UniGene /DEF=Homo sapiens, clone MGC:10846 IMAGE:3616550, mRNA, complete cds. /PROD=Unknown (protein for MGC:10846) /FL=gb:BC004948.1
	238277_at	0.016556	9.4476e-05	-1.3208	-0.401415	1.3208	down	1.03103	0.044093	1.03103	up	-1.2611	-0.334678	1.2611	down	-1.64418	-0.717366	1.64418	down			gb:AI023336 /DB_XREF=gi:3239742 /DB_XREF=ox04c03.x1 /CLONE=IMAGE:1655332 /FEA=EST /CNT=5 /TID=Hs.270736.0 /TIER=ConsEnd /STK=5 /UG=Hs.270736 /UG_TITLE=ESTs
DNAJC5	224613_s_at	0.0166269	9.51849e-05	1.1168	0.159376	1.1168	up	1.46888	0.554716	1.46888	up	1.45737	0.543372	1.45737	up	2.27103	1.18335	2.27103	up	80331	Hs.164419	gb:BF115518 /DB_XREF=gi:10984994 /DB_XREF=7m90g04.x1 /CLONE=IMAGE:3562543 /FEA=mRNA /CNT=294 /TID=Hs.165563.0 /TIER=Stack /STK=15 /UG=Hs.165563 /LL=80331 /UG_GENE=DKFZP434N1429 /UG_TITLE=hypothetical protein DKFZp434N1429
GMIP	222782_s_at	0.0167315	9.6151e-05	-1.06252	-0.0874891	1.06252	down	1.56772	0.648664	1.56772	up	1.27376	0.349097	1.27376	up	2.20986	1.14396	2.20986	up	51291	Hs.49427	gb:BF000144 /DB_XREF=gi:10700419 /DB_XREF=7h18d01.x1 /CLONE=IMAGE:3316321 /FEA=FLmRNA /CNT=80 /TID=Hs.49427.0 /TIER=Stack /STK=19 /UG=Hs.49427 /LL=51291 /UG_GENE=LOC51291 /UG_TITLE=Gem-interacting protein /FL=gb:NM_016573.1 gb:AF132541.1
SLF2	1553909_x_at	0.0167315	9.64656e-05	-1.26654	-0.34089	1.26654	down	1.05851	0.082029	1.05851	up	-1.27378	-0.349112	1.27378	down	-1.63409	-0.708489	1.63409	down	55719	Hs.447458	gb:NM_144592.1 /DB_XREF=gi:21389374 /TID=Hs2.93581.2 /CNT=3 /FEA=FLmRNA /TIER=FL /STK=0 /LL=55719 /UG_GENE=C10orf6 /UG=Hs.93581 /UG_TITLE=chromosome 10 open reading frame 6 /DEF=Homo sapiens chromosome 10 open reading frame 6 (C10orf6), mRNA. /FL=gb:NM_144592.1
TRA2B	210180_s_at	0.0167315	9.74776e-05	-1.48278	-0.568304	1.48278	down	-1.65055	-0.722951	1.65055	down	-4.00439	-2.00158	4.00439	down	-2.25923	-1.17583	2.25923	down	6434	Hs.533122	gb:U87836.1 /DB_XREF=gi:2367403 /FEA=FLmRNA /CNT=18 /TID=Hs.30035.1 /TIER=FL /STK=0 /UG=Hs.30035 /LL=6434 /UG_GENE=SFRS10 /DEF=Homo sapiens htra2-beta-2 mRNA, complete cds. /PROD=htra2-beta-2 /FL=gb:U87836.1
NCOA3	209060_x_at	0.0167315	9.75511e-05	-1.53657	-0.619713	1.53657	down	-1.0333	-0.0472567	1.0333	down	-2.91582	-1.5439	2.91582	down	-1.27047	-0.345361	1.27047	down	8202	Hs.592142	gb:AI438999 /DB_XREF=gi:4301251 /DB_XREF=tc84b12.x1 /CLONE=IMAGE:2072831 /FEA=FLmRNA /CNT=186 /TID=Hs.225977.1 /TIER=Stack /STK=8 /UG=Hs.225977 /LL=8202 /UG_GENE=NCOA3 /UG_TITLE=nuclear receptor coactivator 3 /FL=gb:AF012108.1 gb:AF016031.1 gb:AF010227.1
ABCB9	1555323_at	0.0167315	9.77661e-05	-1.32427	-0.405195	1.32427	down	-1.08028	-0.111407	1.08028	down	-1.12939	-0.175544	1.12939	down	-1.40735	-0.492977	1.40735	down	23457	Hs.511951	gb:BC017348.1 /DB_XREF=gi:16878303 /TID=Hs2.6129.3 /CNT=1 /FEA=FLmRNA /TIER=FL /STK=1 /LL=23457 /UG_GENE=ABCB9 /UG=Hs.6129 /DEF=Homo sapiens, Similar to ATP-binding cassette, sub-family B (MDRTAP), member 9, clone MGC:29663 IMAGE:5014247, mRNA, complete cds. /PROD=Similar to ATP-binding cassette, sub-family B(MDRTAP), member 9 /FL=gb:BC017348.1
ASAP1-IT1	220694_at	0.0167315	9.78598e-05	1.05377	0.0755579	1.05377	up	2.42842	1.28002	2.42842	up	1.26682	0.341215	1.26682	up	-1.16941	-0.225776	1.16941	down	29065	Hs.639318	gb:NM_014152.1 /DB_XREF=gi:7661759 /GEN=HSPC054 /FEA=FLmRNA /CNT=4 /TID=Hs.278946.0 /TIER=FL /STK=0 /UG=Hs.278946 /LL=29065 /DEF=Homo sapiens HSPC054 protein (HSPC054), mRNA. /PROD=HSPC054 protein /FL=gb:NM_014152.1 gb:AF161539.1
ANTXR2	1555536_at	0.0167315	9.81747e-05	-1.12121	-0.16506	1.12121	down	1.26328	0.337171	1.26328	up	1.03889	0.0550482	1.03889	up	1.50213	0.587007	1.50213	up	118429	Hs.162963	gb:AY040326.1 /DB_XREF=gi:15418998 /TID=Hs2.5897.3 /CNT=1 /FEA=FLmRNA /TIER=FL /STK=1 /LL=118429 /UG_GENE=CMG2 /UG=Hs.5897 /DEF=Homo sapiens capillary morphogenesis protein-2 mRNA, complete cds. /PROD=capillary morphogenesis protein-2 /FL=gb:AY040326.1
	217579_x_at	0.0167315	9.82318e-05	-1.24055	-0.310979	1.24055	down	-1.40855	-0.494213	1.40855	down	-1.98919	-0.992183	1.98919	down	-2.46751	-1.30305	2.46751	down		Hs.659907	gb:AW301806 /DB_XREF=gi:6711483 /DB_XREF=xr56e11.x1 /CLONE=IMAGE:2764172 /FEA=EST /CNT=7 /TID=Hs.150551.0 /TIER=ConsEnd /STK=1 /UG=Hs.150551 /UG_TITLE=ESTs, Weakly similar to ALU1_HUMAN ALU SUBFAMILY J SEQUENCE CONTAMINATION WARNING ENTRY (H.sapiens)
LOC729966///PDE4C	206792_x_at	0.0167463	9.87173e-05	-1.29315	-0.370885	1.29315	down	1.00406	0.00584146	1.00406	up	-1.17717	-0.235324	1.17717	down	-2.09274	-1.06539	2.09274	down	5143///729966	Hs.132584	gb:NM_000923.1 /DB_XREF=gi:4505664 /GEN=PDE4C /FEA=FLmRNA /CNT=19 /TID=Hs.189.0 /TIER=FL /STK=0 /UG=Hs.189 /LL=5143 /DEF=Homo sapiens phosphodiesterase 4C, cAMP-specific (dunce (Drosophila)-homolog phosphodiesterase E1) (PDE4C), mRNA. /PROD=phosphodiesterase 4C, cAMP-specific (dunce(Drosophila)-homolog phosphodiesterase E1) /FL=gb:NM_000923.1
	232769_at	0.0167463	9.89309e-05	-1.24231	-0.313026	1.24231	down	1.05986	0.0838778	1.05986	up	-1.14362	-0.19361	1.14362	down	-1.34129	-0.423619	1.34129	down		Hs.667723	gb:AU146585 /DB_XREF=gi:11008106 /DB_XREF=AU146585 /CLONE=HEMBB1000908 /FEA=mRNA /CNT=6 /TID=Hs.258111.0 /TIER=ConsEnd /STK=3 /UG=Hs.258111 /UG_TITLE=Homo sapiens cDNA FLJ10258 fis, clone HEMBB1000908
UGGT1	222568_at	0.0168016	9.95649e-05	-1.22901	-0.297499	1.22901	down	1.19997	0.262994	1.19997	up	1.08576	0.118703	1.08576	up	1.39293	0.478119	1.39293	up	56886	Hs.743306	gb:AI672492 /DB_XREF=gi:4852223 /DB_XREF=wa03h02.x1 /CLONE=IMAGE:2297043 /FEA=FLmRNA /CNT=95 /TID=Hs.105794.0 /TIER=Stack /STK=8 /UG=Hs.105794 /LL=56886 /UG_GENE=HUGT1 /UG_TITLE=UDP-glucose:glycoprotein glucosyltransferase 1 /FL=gb:NM_020120.1 gb:AF227905.1
NFAT5	208003_s_at	0.0168488	0.000100153	-1.0346	-0.04908	1.0346	down	1.51811	0.602278	1.51811	up	-2.99153	-1.58088	2.99153	down	-1.72482	-0.786447	1.72482	down	10725	Hs.371987	gb:NM_006599.1 /DB_XREF=gi:5729944 /GEN=NFAT5 /FEA=FLmRNA /CNT=3 /TID=Hs.86998.0 /TIER=FL /STK=0 /UG=Hs.86998 /LL=10725 /DEF=Homo sapiens nuclear factor of activated T-cells 5, tonicity-resonsive (NFAT5), mRNA. /PROD=nuclear factor of activated T-cells 5,tonicity-resonsive /FL=gb:AF163836.1 gb:AB020634.1 gb:NM_006599.1
RCAN1	215253_s_at	0.0168556	0.000100502	-1.18012	-0.238933	1.18012	down	-1.01419	-0.0203239	1.01419	down	1.20532	0.269416	1.20532	up	1.43392	0.519964	1.43392	up	1827	Hs.282326	gb:AL049369.1 /DB_XREF=gi:4500160 /FEA=mRNA /CNT=5 /TID=Hs.250724.0 /TIER=ConsEnd /STK=0 /UG=Hs.250724 /UG_TITLE=Homo sapiens mRNA; cDNA DKFZp586D0518 (from clone DKFZp586D0518) /DEF=Homo sapiens mRNA; cDNA DKFZp586D0518 (from clone DKFZp586D0518).
LOC142937	1552986_at	0.016981	0.00010156	-1.18585	-0.245921	1.18585	down	1.76097	0.816372	1.76097	up	-1.00612	-0.00880957	1.00612	down	-1.11728	-0.159997	1.11728	down	142937	Hs.679824	gb:NM_138470.1 /DB_XREF=gi:19924002 /TID=Hs2.334930.1 /CNT=3 /FEA=FLmRNA /TIER=FL /STK=2 /LL=142937 /UG_GENE=LOC142937 /UG=Hs.334930 /UG_TITLE=hypothetical protein BC008131 /DEF=Homo sapiens hypothetical protein BC008131 (LOC142937), mRNA. /FL=gb:BC008131.1 gb:NM_138470.1
PDCD7	230182_at	0.0170277	0.000102395	-1.15072	-0.202537	1.15072	down	-1.11697	-0.159593	1.11697	down	-1.071	-0.098957	1.071	down	-1.48961	-0.574939	1.48961	down	10081	Hs.458596	gb:AI951640 /DB_XREF=gi:5743950 /DB_XREF=wv37f09.x1 /CLONE=IMAGE:2531753 /FEA=EST /CNT=20 /TID=Hs.143253.0 /TIER=Stack /STK=19 /UG=Hs.143253 /LL=10081 /UG_GENE=PDCD7 /UG_TITLE=programmed cell death 7
RPL28	200003_s_at	0.0170277	0.000102563	1.02465	0.0351276	1.02465	up	-1.27782	-0.353688	1.27782	down	-1.24666	-0.31807	1.24666	down	-1.34725	-0.430019	1.34725	down	6158	Hs.652114	gb:NM_000991.1 /DB_XREF=gi:4506626 /GEN=RPL28 /FEA=FLmRNA /CNT=416 /TID=Hs.4437.0 /TIER=FL+Stack /STK=144 /UG=Hs.4437 /LL=6158 /DEF=Homo sapiens ribosomal protein L28 (RPL28), mRNA. /PROD=ribosomal protein L28 /FL=gb:U14969.1 gb:BC000072.1 gb:NM_000991.1
	237629_at	0.0170277	0.000102793	-1.32423	-0.405151	1.32423	down	-1.11889	-0.16207	1.11889	down	-1.21308	-0.27868	1.21308	down	-1.32298	-0.403791	1.32298	down		Hs.635231	gb:BF510935 /DB_XREF=gi:11594159 /DB_XREF=UI-H-BI4-apo-g-01-0-UI.s1 /CLONE=IMAGE:3088296 /FEA=EST /CNT=5 /TID=Hs.171291.0 /TIER=ConsEnd /STK=5 /UG=Hs.171291 /UG_TITLE=ESTs
ORAI2	218811_at	0.0170277	0.000103085	-1.20674	-0.271117	1.20674	down	1.34447	0.427036	1.34447	up	1.09459	0.130391	1.09459	up	1.82045	0.864294	1.82045	up	80228	Hs.736659	gb:BF939788 /DB_XREF=gi:12357031 /DB_XREF=nac84c04.x1 /CLONE=IMAGE:3441007 /FEA=FLmRNA /CNT=69 /TID=Hs.289053.0 /TIER=Stack /STK=15 /UG=Hs.289053 /LL=80228 /UG_GENE=FLJ12474 /UG_TITLE=hypothetical protein FLJ12474 /FL=gb:NM_025156.1
ATP6V0A1	212383_at	0.0173079	0.000105113	1.07643	0.106251	1.07643	up	1.72204	0.784121	1.72204	up	1.80227	0.849815	1.80227	up	1.75187	0.808893	1.75187	up	535	Hs.463074	gb:AL096733.1 /DB_XREF=gi:5419866 /FEA=mRNA /CNT=137 /TID=Hs.267871.1 /TIER=Stack /STK=67 /UG=Hs.267871 /LL=535 /UG_GENE=ATP6N1A /UG_TITLE=ATPase, H+ transporting, lysosomal (vacuolar proton pump) non-catalytic accessory protein 1A (110116kD) /DEF=Homo sapiens mRNA; cDNA DKFZp434E071 (from clone DKFZp434E071).
	241686_x_at	0.0173079	0.000105834	-1.36622	-0.450188	1.36622	down	1.06518	0.0911007	1.06518	up	-1.10588	-0.145196	1.10588	down	-1.51651	-0.600754	1.51651	down		Hs.542861	gb:AI668659 /DB_XREF=gi:4827967 /DB_XREF=zb43h11.x5 /CLONE=IMAGE:306405 /FEA=EST /CNT=3 /TID=Hs.50800.0 /TIER=ConsEnd /STK=3 /UG=Hs.50800 /UG_TITLE=ESTs, Weakly similar to ALU1_HUMAN ALU SUBFAMILY J SEQUENCE CONTAMINATION WARNING ENTRY (H.sapiens)
MED13	244611_at	0.0173079	0.000106053	-1.2651	-0.339252	1.2651	down	-1.19894	-0.26176	1.19894	down	-1.44612	-0.532188	1.44612	down	-1.29114	-0.368648	1.29114	down	9969	Hs.282678	gb:H38035 /DB_XREF=gi:907534 /DB_XREF=yp58a10.s1 /CLONE=IMAGE:191610 /FEA=EST /CNT=9 /TID=Hs.85481.0 /TIER=ConsEnd /STK=3 /UG=Hs.85481 /UG_TITLE=ESTs, Highly similar to thyroid hormone receptor-associated protein complex component TRAP240 (H.sapiens)
INPP5A	1554757_a_at	0.0173079	0.000106216	-1.05603	-0.0786499	1.05603	down	1.14666	0.197442	1.14666	up	1.11727	0.159974	1.11727	up	2.09048	1.06384	2.09048	up	3632	Hs.523360	gb:AF273055.1 /DB_XREF=gi:21262189 /TID=Hs2.124029.2 /CNT=4 /FEA=FLmRNA /TIER=FL /STK=1 /LL=3632 /UG_GENE=INPP5A /UG=Hs.124029 /DEF=Homo sapiens CTCL tumor antigen HD-CL-02 mRNA, complete cds. /PROD=CTCL tumor antigen HD-CL-02 /FL=gb:AF273055.1
	215401_at	0.0173079	0.000106364	-1.37821	-0.462797	1.37821	down	-1.64797	-0.720691	1.64797	down	-1.85661	-0.892668	1.85661	down	-3.71061	-1.89166	3.71061	down		Hs.661985	gb:AU147698 /DB_XREF=gi:11009219 /DB_XREF=AU147698 /CLONE=MAMMA1001408 /FEA=mRNA /CNT=5 /TID=Hs.306633.0 /TIER=ConsEnd /STK=1 /UG=Hs.306633 /UG_TITLE=Homo sapiens cDNA FLJ12248 fis, clone MAMMA1001408
ARF3	200011_s_at	0.0174427	0.000107512	1.15974	0.213797	1.15974	up	1.63664	0.710733	1.63664	up	1.63421	0.708596	1.63421	up	1.75357	0.810297	1.75357	up	377	Hs.119177	gb:NM_001659.1 /DB_XREF=gi:4502202 /GEN=ARF3 /FEA=FLmRNA /CNT=401 /TID=Hs.119177.0 /TIER=FL+Stack /STK=99 /UG=Hs.119177 /LL=377 /DEF=Homo sapiens ADP-ribosylation factor 3 (ARF3), mRNA. /PROD=ADP-ribosylation factor 3 /FL=gb:M74491.1 gb:NM_001659.1
ZNF611	208137_x_at	0.0175785	0.000108685	-1.11721	-0.159899	1.11721	down	1.07609	0.105796	1.07609	up	-1.22652	-0.294566	1.22652	down	-1.85504	-0.891448	1.85504	down	81856	Hs.143951	gb:NM_030972.1 /DB_XREF=gi:13775165 /GEN=MGC5384 /FEA=FLmRNA /CNT=1 /TID=HsAffx.900200.3 /TIER=FL /STK=0 /DEF=Homo sapiens hypothetical protein MGC5384 (MGC5384), mRNA. /PROD=hypothetical protein MGC5384 /FL=gb:NM_030972.1
	243748_at	0.0175785	0.000109037	1.00273	0.00393927	1.00273	up	2.58259	1.36882	2.58259	up	-1.42757	-0.513566	1.42757	down	-2.07711	-1.05458	2.07711	down			gb:AI457449 /DB_XREF=gi:4310318 /DB_XREF=tk08b09.x1 /CLONE=IMAGE:2150393 /FEA=EST /CNT=4 /TID=Hs.192817.0 /TIER=ConsEnd /STK=3 /UG=Hs.192817 /UG_TITLE=ESTs
RPL22L1	225541_at	0.0175785	0.000109634	-1.0322	-0.0457226	1.0322	down	-2.25667	-1.1742	2.25667	down	-1.96904	-0.977492	1.96904	down	-1.72513	-0.786706	1.72513	down	200916	Hs.380933	gb:BE274422 /DB_XREF=gi:9149363 /DB_XREF=601120456F1 /CLONE=IMAGE:2967397 /FEA=EST /CNT=79 /TID=Hs.293981.0 /TIER=Stack /STK=12 /UG=Hs.293981 /UG_TITLE=ESTs, Weakly similar to RL22_HUMAN 60S RIBOSOMAL PROTEIN L22 (H.sapiens)
RBM8A	222443_s_at	0.0175785	0.000109635	1.10838	0.148456	1.10838	up	-1.82545	-0.868248	1.82545	down	-1.60072	-0.678722	1.60072	down	-1.38064	-0.465341	1.38064	down	9939	Hs.591455	gb:AF182415.1 /DB_XREF=gi:10197629 /GEN=MDS014 /FEA=FLmRNA /CNT=182 /TID=Hs.65648.0 /TIER=FL /STK=1 /UG=Hs.65648 /LL=9939 /DEF=Homo sapiens MDS014 (MDS014) mRNA, complete cds. /PROD=MDS014 /FL=gb:AF198620.1 gb:AF182415.1 gb:AF161463.1 gb:AF127761.1 gb:NM_005105.1 gb:AF231511.1
PHF21A	203278_s_at	0.0179038	0.000112135	1.38213	0.46689	1.38213	up	2.06229	1.04425	2.06229	up	1.70379	0.768749	1.70379	up	1.73566	0.795481	1.73566	up	51317	Hs.502458	gb:NM_016621.1 /DB_XREF=gi:7706159 /GEN=LOC51317 /FEA=FLmRNA /CNT=119 /TID=Hs.106826.0 /TIER=FL+Stack /STK=38 /UG=Hs.106826 /LL=51317 /DEF=Homo sapiens hypothetical protein (LOC51317), mRNA. /PROD=hypothetical protein /FL=gb:NM_016621.1 gb:AF208848.1
LOC401320	1563781_at	0.0179038	0.000112319	-1.13204	-0.178929	1.13204	down	1.76417	0.81899	1.76417	up	1.43156	0.517586	1.43156	up	1.14093	0.190205	1.14093	up	401320	Hs.561708	gb:AK096687.1 /DB_XREF=gi:21756233 /TID=Hs2.437156.1 /CNT=1 /FEA=mRNA /TIER=ConsEnd /STK=0 /LL=285949 /UG_GENE=LOC285949 /UG=Hs.437156 /UG_TITLE=hypothetical protein LOC285949 /DEF=Homo sapiens cDNA FLJ39368 fis, clone PEBLM2007188.
CANX	208852_s_at	0.0179159	0.000113025	-1.12592	-0.17111	1.12592	down	1.66506	0.735576	1.66506	up	1.50359	0.58841	1.50359	up	2.9567	1.56399	2.9567	up	821	Hs.567968	gb:AI761759 /DB_XREF=gi:5177515 /DB_XREF=wg67h12.x1 /CLONE=IMAGE:2370215 /FEA=FLmRNA /CNT=288 /TID=Hs.155560.0 /TIER=Stack /STK=34 /UG=Hs.155560 /LL=821 /UG_GENE=CANX /UG_TITLE=calnexin /FL=gb:L18887.1 gb:L10284.1 gb:M94859.1 gb:NM_001746.1 gb:BC003552.1 gb:M98452.1
	238159_at	0.0179159	0.000113564	-1.44056	-0.526634	1.44056	down	-1.01031	-0.0148012	1.01031	down	-1.49841	-0.58343	1.49841	down	-1.39367	-0.478891	1.39367	down			gb:AI381900 /DB_XREF=gi:4194681 /DB_XREF=te72c06.x1 /CLONE=IMAGE:2092234 /FEA=EST /CNT=16 /TID=Hs.159212.0 /TIER=ConsEnd /STK=1 /UG=Hs.159212 /UG_TITLE=ESTs
SUPT16H	233827_s_at	0.0179159	0.000113691	-1.1633	-0.218221	1.1633	down	-1.24575	-0.317009	1.24575	down	-1.65046	-0.722867	1.65046	down	1.89308	0.920733	1.89308	up	11198	Hs.213724	gb:AK024072.1 /DB_XREF=gi:10436358 /FEA=mRNA /CNT=2 /TID=Hs.14963.1 /TIER=ConsEnd /STK=0 /UG=Hs.14963 /LL=11198 /UG_GENE=FACTP140 /UG_TITLE=chromatin-specific transcription elongation factor, 140 kDa subunit /DEF=Homo sapiens cDNA FLJ14010 fis, clone Y79AA1002433, highly similar to Homo sapiens chromatin-specific transcription elongation factor FACT 140 kDa subunit mRNA.
TIGIT	240070_at	0.0179159	0.000113705	1.48452	0.569997	1.48452	up	-1.61892	-0.695028	1.61892	down	-1.43687	-0.52293	1.43687	down	-1.50233	-0.587207	1.50233	down	201633	Hs.421750	gb:AW512550 /DB_XREF=gi:7150628 /DB_XREF=xx64d09.x1 /CLONE=IMAGE:2848433 /FEA=EST /CNT=5 /TID=Hs.154570.0 /TIER=ConsEnd /STK=4 /UG=Hs.154570 /UG_TITLE=ESTs
BBX	223135_s_at	0.0179253	0.000114656	-1.14059	-0.189782	1.14059	down	-1.73297	-0.793243	1.73297	down	-2.63845	-1.39969	2.63845	down	-2.19303	-1.13292	2.19303	down	56987	Hs.124366	gb:AL136769.1 /DB_XREF=gi:12053054 /GEN=DKFZp434I1116 /FEA=FLmRNA /CNT=126 /TID=Hs.35380.0 /TIER=FL /STK=0 /UG=Hs.35380 /LL=56987 /DEF=Homo sapiens mRNA; cDNA DKFZp434I1116 (from clone DKFZp434I1116); complete cds. /PROD=hypothetical protein /FL=gb:NM_020235.1 gb:AL136769.1 gb:AF168718.1
SMURF2	230820_at	0.0179253	0.000115318	1.23263	0.301737	1.23263	up	-2.02956	-1.02116	2.02956	down	-2.29306	-1.19727	2.29306	down	-3.80332	-1.92726	3.80332	down	64750	Hs.515011	gb:BF111169 /DB_XREF=gi:10940859 /DB_XREF=7n32g11.x1 /CLONE=IMAGE:3566420 /FEA=EST /CNT=10 /TID=Hs.194477.1 /TIER=Stack /STK=8 /UG=Hs.194477 /LL=64750 /UG_GENE=SMURF2 /UG_TITLE=E3 ubiquitin ligase SMURF2
MFN2	216205_s_at	0.0179253	0.000115426	-1.06353	-0.0888573	1.06353	down	1.6215	0.697331	1.6215	up	1.18911	0.249883	1.18911	up	2.47334	1.30646	2.47334	up	9927	Hs.376681	gb:AK021947.1 /DB_XREF=gi:10433251 /FEA=mRNA /CNT=3 /TID=Hs.3363.2 /TIER=ConsEnd /STK=1 /UG=Hs.3363 /LL=9927 /UG_GENE=KIAA0214 /UG_TITLE=KIAA0214 gene product /DEF=Homo sapiens cDNA FLJ11885 fis, clone HEMBA1007203, highly similar to Homo sapiens mRNA for KIAA0214 protein.
	1560908_at	0.0179253	0.000115525	-1.11513	-0.157207	1.11513	down	1.16132	0.215771	1.16132	up	-1.061	-0.0854188	1.061	down	-1.14162	-0.191085	1.14162	down		Hs.621482	gb:N21555 /DB_XREF=gi:1126725 /DB_XREF=yx60b06.s1 /CLONE=IMAGE:266099 /TID=Hs2.206710.1 /CNT=5 /FEA=mRNA /TIER=ConsEnd /STK=2 /UG=Hs.206710 /UG_TITLE=Homo sapiens full length insert cDNA clone YX60B06
PPP2R5C	214083_at	0.0179253	0.000115651	1.01719	0.0245824	1.01719	up	-2.74007	-1.45421	2.74007	down	-2.39394	-1.25939	2.39394	down	-1.82038	-0.864236	1.82038	down	5527	Hs.368264	gb:AW772123 /DB_XREF=gi:7704186 /DB_XREF=hn67g05.x1 /CLONE=IMAGE:3032984 /FEA=EST /CNT=14 /TID=Hs.171734.1 /TIER=Stack /STK=12 /UG=Hs.171734 /LL=5527 /UG_GENE=PPP2R5C /UG_TITLE=protein phosphatase 2, regulatory subunit B (B56), gamma isoform
	240788_at	0.0179253	0.000115732	-1.23238	-0.301452	1.23238	down	1.18264	0.242012	1.18264	up	1.15346	0.20597	1.15346	up	-1.06563	-0.0917127	1.06563	down		Hs.656597	gb:AI076834 /DB_XREF=gi:3404663 /DB_XREF=oz01c10.x1 /CLONE=IMAGE:1674066 /FEA=EST /CNT=4 /TID=Hs.21160.0 /TIER=ConsEnd /STK=4 /UG=Hs.21160 /UG_TITLE=ESTs
OCIAD1	239748_x_at	0.017946	0.000116194	-1.31505	-0.395123	1.31505	down	1.00305	0.00438878	1.00305	up	-1.26954	-0.344302	1.26954	down	-2.19093	-1.13154	2.19093	down	54940	Hs.518750	gb:H09533 /DB_XREF=gi:874355 /DB_XREF=yl95h12.s1 /CLONE=IMAGE:46131 /FEA=EST /CNT=4 /TID=Hs.262966.0 /TIER=ConsEnd /STK=4 /UG=Hs.262966 /UG_TITLE=ESTs, Moderately similar to ALU1_HUMAN ALU SUBFAMILY J SEQUENCE CONTAMINATION WARNING ENTRY (H.sapiens)
FLI1	211825_s_at	0.0179508	0.000116646	-1.12651	-0.171858	1.12651	down	1.74749	0.805284	1.74749	up	1.48235	0.567886	1.48235	up	2.77116	1.47049	2.77116	up	2313	Hs.504281	gb:AF327066.1 /DB_XREF=gi:12963354 /FEA=FLmRNA /CNT=1 /TID=Hs.129953.3 /TIER=FL /STK=0 /UG=Hs.129953 /LL=2130 /UG_GENE=EWSR1 /DEF=Homo sapiens Ewings sarcoma EWS-Fli1 (type 1) oncogene mRNA, complete cds. /PROD=Ewings sarcoma EWS-Fli1 (type 1) oncogene /FL=gb:AF327066.1
OSTF1	204479_at	0.0179508	0.000116881	1.04627	0.0652498	1.04627	up	1.68826	0.755533	1.68826	up	1.37985	0.464508	1.37985	up	1.82368	0.866856	1.82368	up	26578	Hs.494192	gb:NM_012383.1 /DB_XREF=gi:6912563 /GEN=OSTF1 /FEA=FLmRNA /CNT=68 /TID=Hs.95821.0 /TIER=FL /STK=2 /UG=Hs.95821 /LL=26578 /DEF=Homo sapiens osteoclast stimulating factor 1 (OSTF1), mRNA. /PROD=osteoclast stimulating factor 1 /FL=gb:NM_012383.1 gb:U63717.1
CMTM4	224998_at	0.0179628	0.000117353	1.09713	0.133732	1.09713	up	2.19832	1.1364	2.19832	up	2.2051	1.14084	2.2051	up	2.09083	1.06407	2.09083	up	146223	Hs.643961	gb:AK000855.1 /DB_XREF=gi:7021178 /FEA=mRNA /CNT=138 /TID=Hs.325825.0 /TIER=Stack /STK=56 /UG=Hs.325825 /UG_TITLE=Homo sapiens cDNA FLJ20848 fis, clone ADKA01732 /DEF=Homo sapiens cDNA FLJ20848 fis, clone ADKA01732.
LINC01578	230156_x_at	0.0179628	0.000117617	1.38667	0.471619	1.38667	up	-2.87008	-1.52109	2.87008	down	-2.86156	-1.5168	2.86156	down	-2.6669	-1.41516	2.6669	down	100507217	Hs.622504	gb:AI933049 /DB_XREF=gi:5671786 /DB_XREF=wp62d04.x1 /CLONE=IMAGE:2466343 /FEA=EST /CNT=16 /TID=Hs.287864.0 /TIER=Stack /STK=9 /UG=Hs.287864 /UG_TITLE=Homo sapiens cDNA FLJ14030 fis, clone HEMBA1004086
RGS1	202988_s_at	0.01797	0.000118461	-1.17103	-0.227781	1.17103	down	-20.1173	-4.33036	20.1173	down	-12.4996	-3.64381	12.4996	down	-8.55994	-3.0976	8.55994	down	5996	Hs.75256	gb:NM_002922.1 /DB_XREF=gi:4506514 /GEN=RGS1 /FEA=FLmRNA /CNT=135 /TID=Hs.75256.0 /TIER=FL /STK=0 /UG=Hs.75256 /LL=5996 /DEF=Homo sapiens regulator of G-protein signalling 1 (RGS1), mRNA. /PROD=regulator of G-protein signalling 1 /FL=gb:NM_002922.1
ADPRM	220606_s_at	0.01797	0.000118643	-1.35589	-0.43924	1.35589	down	-3.33792	-1.73895	3.33792	down	-3.62544	-1.85816	3.62544	down	-2.1308	-1.0914	2.1308	down	56985	Hs.47668	gb:NM_020233.1 /DB_XREF=gi:9910423 /GEN=MDS006 /FEA=FLmRNA /CNT=7 /TID=Hs.47668.0 /TIER=FL /STK=0 /UG=Hs.47668 /LL=56985 /DEF=Homo sapiens x 006 protein (MDS006), mRNA. /PROD=x 006 protein /FL=gb:NM_020233.1 gb:AF168715.1
POU2F2	229750_at	0.01797	0.00011867	1.01785	0.0255225	1.01785	up	1.61087	0.687844	1.61087	up	2.21532	1.14752	2.21532	up	1.16677	0.222523	1.16677	up	5452	Hs.147381	gb:BF510728 /DB_XREF=gi:11594026 /DB_XREF=UI-H-BI4-aoh-c-07-0-UI.s1 /CLONE=IMAGE:3084685 /FEA=EST /CNT=17 /TID=Hs.143087.0 /TIER=Stack /STK=8 /UG=Hs.143087 /UG_TITLE=ESTs
CCDC152	237475_x_at	0.01797	0.000119286	-1.36817	-0.452243	1.36817	down	1.03887	0.0550186	1.03887	up	-1.24835	-0.320018	1.24835	down	-2.1625	-1.1127	2.1625	down	100129792	Hs.745017	gb:AI151104 /DB_XREF=gi:3679573 /DB_XREF=qb48d05.x1 /CLONE=IMAGE:1703337 /FEA=EST /CNT=5 /TID=Hs.22529.0 /TIER=ConsEnd /STK=5 /UG=Hs.22529 /UG_TITLE=ESTs, Weakly similar to ALU1_HUMAN ALU SUBFAMILY J SEQUENCE CONTAMINATION WARNING ENTRY (H.sapiens)
VCP	208649_s_at	0.01797	0.000119307	1.2059	0.270113	1.2059	up	1.40204	0.487526	1.40204	up	1.64312	0.716435	1.64312	up	1.48756	0.572947	1.48756	up	7415	Hs.529782	gb:AF100752.1 /DB_XREF=gi:5410289 /FEA=FLmRNA /CNT=473 /TID=Hs.106357.0 /TIER=FL /STK=0 /UG=Hs.106357 /LL=7415 /UG_GENE=VCP /DEF=Homo sapiens transitional endoplasmic reticulum ATPase mRNA, complete cds. /PROD=transitional endoplasmic reticulum ATPase /FL=gb:NM_007126.2 gb:AF100752.1
GS1-124K5.11	231992_x_at	0.018063	0.000120429	-1.42103	-0.506938	1.42103	down	1.03442	0.0488249	1.03442	up	-1.19268	-0.25421	1.19268	down	-1.70693	-0.771402	1.70693	down	493754	Hs.741442	gb:AK024371.1 /DB_XREF=gi:10436741 /FEA=mRNA /CNT=13 /TID=Hs.129013.0 /TIER=ConsEnd /STK=0 /UG=Hs.129013 /UG_TITLE=Homo sapiens cDNA FLJ14309 fis, clone PLACE3000221 /DEF=Homo sapiens cDNA FLJ14309 fis, clone PLACE3000221.
TMCO3	220241_at	0.018063	0.000120585	1.13855	0.187198	1.13855	up	1.34357	0.426068	1.34357	up	1.21051	0.275615	1.21051	up	1.84711	0.885271	1.84711	up	55002	Hs.317593	gb:NM_017905.1 /DB_XREF=gi:8923574 /GEN=FLJ20623 /FEA=FLmRNA /CNT=9 /TID=Hs.27337.0 /TIER=FL /STK=0 /UG=Hs.27337 /LL=55002 /DEF=Homo sapiens hypothetical protein FLJ20623 (FLJ20623), mRNA. /PROD=hypothetical protein FLJ20623 /FL=gb:NM_017905.1
UBXN11	227716_at	0.0181398	0.000121536	1.13687	0.185067	1.13687	up	2.22898	1.15638	2.22898	up	2.8045	1.48775	2.8045	up	3.24254	1.69712	3.24254	up	91544	Hs.145061	gb:AL577976 /DB_XREF=gi:12941616 /DB_XREF=AL577976 /CLONE=CS0DK008YF07 (3 prime) /FEA=mRNA /CNT=22 /TID=Hs.145061.0 /TIER=Stack /STK=11 /UG=Hs.145061 /UG_TITLE=Homo sapiens clone CDABP0155 mRNA sequence
	213879_at	0.0181398	0.000121898	1.26702	0.34144	1.26702	up	-1.32247	-0.403238	1.32247	down	-1.77105	-0.824608	1.77105	down	-2.07154	-1.05071	2.07154	down		Hs.592555	gb:AV726646 /DB_XREF=gi:10836067 /DB_XREF=AV726646 /CLONE=HTCAPG08 /FEA=EST /CNT=29 /TID=Hs.180139.1 /TIER=Stack /STK=11 /UG=Hs.180139 /LL=6613 /UG_GENE=SMT3H2 /UG_TITLE=SMT3 (suppressor of mif two 3, yeast) homolog 2
SURF4	222979_s_at	0.0181398	0.000122093	1.11722	0.159913	1.11722	up	1.37821	0.462792	1.37821	up	1.34256	0.42499	1.34256	up	1.95576	0.96773	1.95576	up	6836	Hs.512465	gb:AF078866.1 /DB_XREF=gi:5531846 /FEA=FLmRNA /CNT=485 /TID=Hs.284296.0 /TIER=FL+Stack /STK=25 /UG=Hs.284296 /DEF=Homo sapiens SURF-4 mRNA, complete cds. /PROD=SURF-4 /FL=gb:AF078866.1
SUPT6H	1554311_a_at	0.018229	0.000123179	-1.03889	-0.0550415	1.03889	down	1.03026	0.0430128	1.03026	up	1.08841	0.122228	1.08841	up	1.50657	0.591269	1.50657	up	6830	Hs.250429	gb:BC033074.1 /DB_XREF=gi:21620091 /TID=Hs2.12303.2 /CNT=6 /FEA=FLmRNA /TIER=FL /STK=2 /LL=6830 /UG_GENE=SUPT6H /UG=Hs.12303 /DEF=Homo sapiens, Similar to suppressor of Ty 6 homolog (S. cerevisiae), clone MGC:45626 IMAGE:4877063, mRNA, complete cds. /PROD=Similar to suppressor of Ty 6 homolog (S.cerevisiae) /FL=gb:BC033074.1
STK11IP	225713_at	0.018229	0.0001238	1.14649	0.197226	1.14649	up	1.27105	0.346025	1.27105	up	1.77176	0.825181	1.77176	up	1.59146	0.670352	1.59146	up	114790	Hs.22410	gb:AV727346 /DB_XREF=gi:10836767 /DB_XREF=AV727346 /CLONE=HTCACC11 /FEA=EST /CNT=69 /TID=Hs.22410.0 /TIER=Stack /STK=44 /UG=Hs.22410 /UG_TITLE=ESTs
MMGT1	225125_at	0.018229	0.000123953	1.11492	0.156937	1.11492	up	1.50928	0.593856	1.50928	up	1.49775	0.582794	1.49775	up	1.51839	0.602539	1.51839	up	93380	Hs.110702	gb:BF978280 /DB_XREF=gi:12345495 /DB_XREF=602148240F1 /CLONE=IMAGE:4307192 /FEA=mRNA /CNT=98 /TID=Hs.110702.0 /TIER=Stack /STK=34 /UG=Hs.110702 /UG_TITLE=Homo sapiens mRNA; cDNA DKFZp761E212 (from clone DKFZp761E212)
SRRD	213608_s_at	0.018229	0.000124027	1.294	0.371834	1.294	up	-1.38567	-0.470589	1.38567	down	-1.10654	-0.146055	1.10654	down	-1.05669	-0.0795531	1.05669	down	402055	Hs.709914	gb:AI220627 /DB_XREF=gi:3802830 /DB_XREF=qg01a03.x1 /CLONE=IMAGE:1758220 /FEA=EST /CNT=35 /TID=Hs.20225.3 /TIER=Stack /STK=22 /UG=Hs.20225 /LL=24144 /UG_GENE=TIP39 /UG_TITLE=tuftelin-interacting protein
RNASEL	221287_at	0.0182881	0.000124764	-1.0039	-0.00562027	1.0039	down	1.51022	0.594756	1.51022	up	1.23631	0.306036	1.23631	up	1.54744	0.629887	1.54744	up	6041	Hs.518545	gb:NM_021133.1 /DB_XREF=gi:10863928 /GEN=RNASEL /FEA=FLmRNA /CNT=7 /TID=Hs.249230.0 /TIER=FL /STK=0 /UG=Hs.249230 /LL=6041 /DEF=Homo sapiens ribonuclease L (2,5-oligoisoadenylate synthetase-dependent) (RNASEL), mRNA. /PROD=ribonuclease L (2,5-oligoisoadenylatesynthetase-dependent) /FL=gb:NM_021133.1
UHMK1	235003_at	0.0183736	0.000125934	1.08198	0.113672	1.08198	up	1.29332	0.371081	1.29332	up	-4.29224	-2.10173	4.29224	down	-1.83339	-0.874515	1.83339	down	127933	Hs.127310	gb:AI249980 /DB_XREF=gi:3846509 /DB_XREF=qx47f01.x1 /CLONE=IMAGE:2004505 /FEA=EST /CNT=34 /TID=Hs.144825.0 /TIER=ConsEnd /STK=1 /UG=Hs.144825 /UG_TITLE=ESTs, Weakly similar to 1805352A splicing factor U2AF:SUBUNIT
SLC16A5	206599_at	0.0183736	0.000126019	-1.0991	-0.136324	1.0991	down	1.53534	0.61856	1.53534	up	1.45486	0.540876	1.45486	up	1.75439	0.810972	1.75439	up	9121	Hs.592095	gb:NM_004695.1 /DB_XREF=gi:4759115 /GEN=SLC16A5 /FEA=FLmRNA /CNT=12 /TID=Hs.90911.0 /TIER=FL /STK=7 /UG=Hs.90911 /LL=9121 /DEF=Homo sapiens solute carrier family 16 (monocarboxylic acid transporters), member 5 (SLC16A5), mRNA. /PROD=solute carrier family 16 (monocarboxylic acidtransporters), member 5 /FL=gb:U59299.1 gb:NM_004695.1
LOC102723458	239988_at	0.0183892	0.000127109	1.28255	0.359012	1.28255	up	-2.80703	-1.48905	2.80703	down	-2.3026	-1.20326	2.3026	down	-2.98302	-1.57677	2.98302	down	102723458		gb:AA708470 /DB_XREF=gi:2718388 /DB_XREF=zf93a11.s1 /CLONE=IMAGE:384476 /FEA=EST /CNT=4 /TID=Hs.180138.0 /TIER=ConsEnd /STK=4 /UG=Hs.180138 /UG_TITLE=ESTs
NLN	234762_x_at	0.0183892	0.000127329	-1.32667	-0.407814	1.32667	down	1.03493	0.049538	1.03493	up	-1.25925	-0.332564	1.25925	down	-2.37328	-1.24688	2.37328	down	57486		gb:AK026655.1 /DB_XREF=gi:10439553 /FEA=mRNA /CNT=1 /TID=Hs.306860.0 /TIER=ConsEnd /STK=0 /UG=Hs.306860 /UG_TITLE=Homo sapiens cDNA: FLJ23002 fis, clone LNG00310 /DEF=Homo sapiens cDNA: FLJ23002 fis, clone LNG00310.
POGK	218229_s_at	0.0183892	0.000127516	1.28148	0.357806	1.28148	up	1.22703	0.295171	1.22703	up	1.39587	0.481161	1.39587	up	1.7142	0.777537	1.7142	up	57645	Hs.432752	gb:NM_017542.1 /DB_XREF=gi:8923835 /GEN=KIAA1513 /FEA=FLmRNA /CNT=98 /TID=Hs.284227.0 /TIER=FL /STK=0 /UG=Hs.284227 /LL=57645 /DEF=Homo sapiens KIAA1513 protein (KIAA1513), mRNA. /PROD=KIAA1513 protein /FL=gb:NM_017542.1
ARHGAP1	216689_x_at	0.0183892	0.000127604	-1.09088	-0.125499	1.09088	down	1.54241	0.625188	1.54241	up	1.4198	0.505692	1.4198	up	2.10295	1.07242	2.10295	up	392	Hs.138860	gb:U62794.1 /DB_XREF=gi:2326170 /FEA=mRNA /CNT=1 /TID=Hs.138860.1 /TIER=ConsEnd /STK=0 /UG=Hs.138860 /LL=392 /UG_GENE=ARHGAP1 /DEF=Human CDC42 GAP-related protein mRNA, partial cds. /PROD=CDC42 GAP-related protein
ATP6V1G1	208737_at	0.0183892	0.000127808	-1.08064	-0.111885	1.08064	down	-1.30747	-0.38678	1.30747	down	-1.68404	-0.751925	1.68404	down	-1.41493	-0.500728	1.41493	down	9550	Hs.388654	gb:BC003564.1 /DB_XREF=gi:13097719 /FEA=FLmRNA /CNT=450 /TID=Hs.90336.0 /TIER=FL /STK=2 /UG=Hs.90336 /LL=9550 /UG_GENE=ATP6J /DEF=Homo sapiens, ATPase, H+ transporting, lysosomal (vacuolar proton pump), member J, clone MGC:1970, mRNA, complete cds. /PROD=ATPase, H+ transporting, lysosomal (vacuolarproton pump), member J /FL=gb:AF038954.1 gb:BC003564.1 gb:NM_004888.1
LOC105369662	1558740_s_at	0.0185319	0.000129138	-1.14791	-0.199008	1.14791	down	-1.51503	-0.599345	1.51503	down	-2.28091	-1.18961	2.28091	down	-2.70187	-1.43396	2.70187	down	105369662	Hs.656821	gb:R30807 /DB_XREF=gi:786674 /DB_XREF=yh55h06.r1 /CLONE=IMAGE:133691 /TID=Hs2.270793.1 /CNT=11 /FEA=mRNA /TIER=ConsEnd /STK=0 /UG=Hs.270793 /UG_TITLE=Homo sapiens cDNA FLJ37336 fis, clone BRAMY2020412.
ZC3H7B	206169_x_at	0.0185759	0.000129847	-1.40578	-0.491375	1.40578	down	1.06585	0.0920107	1.06585	up	-1.28729	-0.364334	1.28729	down	-2.10482	-1.0737	2.10482	down	23264		gb:NM_025013.1 /DB_XREF=gi:13430879 /GEN=KIAA1031 /FEA=FLmRNA /CNT=16 /TID=Hs.25347.0 /TIER=FL /STK=0 /UG=Hs.25347 /LL=23264 /DEF=Homo sapiens KIAA1031 protein (KIAA1031), mRNA. /PROD=hypothetical protein FLJ13787 /FL=gb:NM_025013.1
PCBP2	213517_at	0.0185759	0.000130125	-1.44459	-0.530658	1.44459	down	1.2708	0.345732	1.2708	up	-1.87129	-0.904036	1.87129	down	-2.13507	-1.09429	2.13507	down	5094		gb:AW103422 /DB_XREF=gi:6074157 /DB_XREF=xd36a02.x1 /CLONE=IMAGE:2595818 /FEA=EST /CNT=40 /TID=Hs.63525.2 /TIER=Stack /STK=17 /UG=Hs.63525 /LL=5094 /UG_GENE=PCBP2 /UG_TITLE=poly(rC)-binding protein 2
RAB5B	201276_at	0.0186178	0.000130759	-1.11366	-0.155307	1.11366	down	1.68971	0.756776	1.68971	up	1.59787	0.676152	1.59787	up	2.01883	1.01352	2.01883	up	5869	Hs.157659	gb:AF267863.1 /DB_XREF=gi:12006052 /FEA=FLmRNA /CNT=256 /TID=Hs.77690.0 /TIER=FL+Stack /STK=83 /UG=Hs.77690 /LL=5869 /UG_GENE=RAB5B /DEF=Homo sapiens DC43 mRNA, complete cds. /PROD=DC43 /FL=gb:AF267863.1 gb:NM_002868.1
CLN8	219341_at	0.0186349	0.000131219	-1.42015	-0.506039	1.42015	down	1.67479	0.74398	1.67479	up	-1.00506	-0.00727524	1.00506	down	-1.45056	-0.536614	1.45056	down	2055	Hs.127675	gb:NM_018941.1 /DB_XREF=gi:9256526 /GEN=CLN8 /FEA=FLmRNA /CNT=54 /TID=Hs.127675.0 /TIER=FL /STK=0 /UG=Hs.127675 /LL=2055 /DEF=Homo sapiens ceroid-lipofuscinosis, neuronal 8 (epilepsy, progressive with mental retardation) (CLN8), mRNA. /PROD=ceroid-lipofuscinosis, neuronal 8 (epilepsy,progressive with mental retardation) /FL=gb:AF123760.1 gb:AF123759.1 gb:AF123757.1 gb:AF123761.1 gb:NM_018941.1
C5orf56	1564276_at	0.0187987	0.000132821	1.24259	0.31335	1.24259	up	-1.41509	-0.500896	1.41509	down	-1.29317	-0.370915	1.29317	down	-1.27662	-0.352324	1.27662	down	441108	Hs.658288	gb:AK096941.1 /DB_XREF=gi:21756554 /TID=Hs2.396984.1 /CNT=1 /FEA=mRNA /TIER=ConsEnd /STK=0 /UG=Hs.396984 /UG_TITLE=Homo sapiens cDNA FLJ39622 fis, clone SMINT2001199. /DEF=Homo sapiens cDNA FLJ39622 fis, clone SMINT2001199.
DYNC1LI2	203590_at	0.0187987	0.00013306	1.16734	0.22323	1.16734	up	1.89219	0.920054	1.89219	up	1.11232	0.153572	1.11232	up	1.02261	0.032254	1.02261	up	1783	Hs.369068	gb:NM_006141.1 /DB_XREF=gi:5453633 /GEN=DNCLI2 /FEA=FLmRNA /CNT=85 /TID=Hs.194625.0 /TIER=FL+Stack /STK=37 /UG=Hs.194625 /LL=1783 /DEF=Homo sapiens dynein, cytoplasmic, light intermediate polypeptide 2 (DNCLI2), mRNA. /PROD=dynein, cytoplasmic, light intermediatepolypeptide 2 /FL=gb:NM_006141.1 gb:AF035812.1
NAA15	219158_s_at	0.0188604	0.000133843	-1.08807	-0.121765	1.08807	down	-1.70103	-0.766405	1.70103	down	-4.41981	-2.14399	4.41981	down	-2.26503	-1.17953	2.26503	down	80155	Hs.745047	gb:NM_025085.1 /DB_XREF=gi:13376639 /GEN=FLJ13340 /FEA=FLmRNA /CNT=40 /TID=Hs.125034.0 /TIER=FL /STK=1 /UG=Hs.125034 /LL=80155 /DEF=Homo sapiens hypothetical protein FLJ13340 (FLJ13340), mRNA. /PROD=hypothetical protein FLJ13340 /FL=gb:NM_025085.1 gb:AF327722.1
SAP18	208742_s_at	0.0188703	0.000134258	1.07006	0.0976947	1.07006	up	-1.69746	-0.763382	1.69746	down	-1.63519	-0.709458	1.63519	down	-1.60135	-0.679287	1.60135	down	10284	Hs.524899	gb:U78303.1 /DB_XREF=gi:6648546 /FEA=FLmRNA /CNT=321 /TID=Hs.23964.0 /TIER=FL+Stack /STK=11 /UG=Hs.23964 /LL=10284 /UG_GENE=SAP18 /DEF=Human 2HOR0202 mRNA, complete cds. /PROD=2HOR0202 /FL=gb:NM_005870.2 gb:U78303.1 gb:U96915.1 gb:AF153608.1
PAIP2	222983_s_at	0.0188789	0.000134843	-1.01493	-0.021382	1.01493	down	-1.59477	-0.673351	1.59477	down	-1.58103	-0.660867	1.58103	down	-1.334	-0.415763	1.334	down	51247	Hs.396644	gb:BC001716.1 /DB_XREF=gi:12804590 /FEA=FLmRNA /CNT=358 /TID=Hs.108548.0 /TIER=FL+Stack /STK=11 /UG=Hs.108548 /LL=51247 /UG_GENE=PAIP2 /DEF=Homo sapiens, Similar to hypothetical protein, clone MGC:879, mRNA, complete cds. /PROD=Similar to hypothetical protein /FL=gb:NM_016480.1 gb:BC001716.1 gb:AL136640.1 gb:AF151052.1 gb:AF317675.1
WDR6	233573_s_at	0.0188789	0.000135319	-1.1339	-0.181295	1.1339	down	-1.09641	-0.132782	1.09641	down	-1.15593	-0.20905	1.15593	down	1.60601	0.68348	1.60601	up	11180	Hs.654815	gb:AK001080.1 /DB_XREF=gi:7022125 /FEA=mRNA /CNT=2 /TID=Hs.8737.2 /TIER=ConsEnd /STK=1 /UG=Hs.8737 /LL=11180 /UG_GENE=WDR6 /UG_TITLE=WD repeat domain 6 /DEF=Homo sapiens cDNA FLJ10218 fis, clone HEMBA1006936.
CDK19	235226_at	0.0188789	0.000136225	-1.16875	-0.22496	1.16875	down	2.08805	1.06215	2.08805	up	-1.25229	-0.324567	1.25229	down	-1.01564	-0.0223904	1.01564	down	23097		gb:AA994004 /DB_XREF=gi:3180549 /DB_XREF=ou42c01.s1 /CLONE=IMAGE:1628928 /FEA=EST /CNT=18 /TID=Hs.128790.0 /TIER=ConsEnd /STK=5 /UG=Hs.128790 /UG_TITLE=ESTs
SAMD12	238673_at	0.0188789	0.000136921	2.34776	1.23129	2.34776	up	1.16376	0.218795	1.16376	up	1.40768	0.493321	1.40768	up	-1.20366	-0.267423	1.20366	down	401474	Hs.701196	gb:AV724325 /DB_XREF=gi:10828601 /DB_XREF=AV724325 /CLONE=HTBAYE05 /FEA=EST /CNT=7 /TID=Hs.132208.0 /TIER=ConsEnd /STK=4 /UG=Hs.132208 /UG_TITLE=ESTs
SSR1	201894_s_at	0.0188789	0.000136965	1.27946	0.355537	1.27946	up	1.99053	0.993151	1.99053	up	1.98247	0.987302	1.98247	up	2.39546	1.2603	2.39546	up	6745	Hs.114033	gb:NM_001920.1 /DB_XREF=gi:4503270 /GEN=DCN /FEA=FLmRNA /CNT=238 /TID=Hs.76152.0 /TIER=FL /STK=0 /UG=Hs.76152 /LL=1634 /DEF=Homo sapiens decorin (DCN), mRNA. /PROD=decorin /FL=gb:NM_001920.1 gb:AF138300.1 gb:AF138304.1 gb:M14219.1
ZFP91	224631_at	0.0188789	0.00013706	1.08701	0.120365	1.08701	up	1.01668	0.0238722	1.01668	up	-1.95588	-0.96782	1.95588	down	-1.92248	-0.942971	1.92248	down	80829	Hs.524920	gb:AA758013 /DB_XREF=gi:2805876 /DB_XREF=ah67f04.s1 /CLONE=1320703 /FEA=mRNA /CNT=214 /TID=Hs.170980.3 /TIER=Stack /STK=14 /UG=Hs.170980 /LL=9238 /UG_GENE=CPR2 /UG_TITLE=cell cycle progression 2 protein
PRTN3	207341_at	0.0188789	0.000137205	-1.57563	-0.655931	1.57563	down	2.69902	1.43244	2.69902	up	1.47113	0.556921	1.47113	up	7.60564	2.92707	7.60564	up	5657	Hs.928	gb:NM_002777.2 /DB_XREF=gi:7382457 /GEN=PRTN3 /FEA=FLmRNA /CNT=8 /TID=Hs.928.0 /TIER=FL /STK=0 /UG=Hs.928 /LL=5657 /DEF=Homo sapiens proteinase 3 (serine proteinase, neutrophil, Wegener granulomatosis autoantigen) (PRTN3), mRNA. /PROD=proteinase 3 (serine proteinase, neutrophil,Wegener granulomatosis autoantigen) /FL=gb:M29142.1 gb:M75154.1 gb:NM_002777.2
TJP2	232017_at	0.0188789	0.000137292	-1.0083	-0.0119302	1.0083	down	1.95367	0.966188	1.95367	up	1.63717	0.7112	1.63717	up	1.14308	0.192925	1.14308	up	9414	Hs.50382	gb:AK025185.1 /DB_XREF=gi:10437648 /FEA=mRNA /CNT=19 /TID=Hs.289005.0 /TIER=ConsEnd /STK=0 /UG=Hs.289005 /UG_TITLE=Homo sapiens cDNA: FLJ21532 fis, clone COL06049 /DEF=Homo sapiens cDNA: FLJ21532 fis, clone COL06049.
SORL1	203509_at	0.0188789	0.000137427	1.11757	0.160368	1.11757	up	2.21181	1.14523	2.21181	up	1.84598	0.884388	1.84598	up	1.36038	0.444006	1.36038	up	6653	Hs.368592	gb:NM_003105.2 /DB_XREF=gi:6325473 /GEN=SORL1 /FEA=FLmRNA /CNT=93 /TID=Hs.278571.0 /TIER=FL+Stack /STK=27 /UG=Hs.278571 /LL=6653 /DEF=Homo sapiens sortilin-related receptor, L(DLR class) A repeats-containing (SORL1), mRNA. /PROD=sortilin-related receptor, L(DLR class) Arepeats-containing /FL=gb:U60975.2 gb:NM_003105.2
CTNS	36566_at	0.0189098	0.000137998	-1.08661	-0.119836	1.08661	down	1.35342	0.436608	1.35342	up	1.23528	0.304835	1.23528	up	1.49854	0.58356	1.49854	up	1497	Hs.187667	Cluster Incl. AJ222967:Homo sapiens mRNA for cystinosin /cds=(339,1442) /gb=AJ222967 /gi=3036839 /ug=Hs.64837 /len=2611
ADAM33	233868_x_at	0.0189663	0.000139068	-1.406	-0.491599	1.406	down	1.00687	0.00987235	1.00687	up	-1.2051	-0.269148	1.2051	down	-1.85044	-0.887866	1.85044	down	80332	Hs.173716	gb:AL117415.1 /DB_XREF=gi:5912106 /FEA=mRNA /CNT=2 /TID=Hs.173716.1 /TIER=ConsEnd /STK=0 /UG=Hs.173716 /LL=80332 /UG_GENE=DJ964F7.1 /UG_TITLE=a disintegrin and metalloproteinase domain /DEF=Homo sapiens mRNA; cDNA DKFZp434K0521 (from clone DKFZp434K0521).
TAF1	216711_s_at	0.0189663	0.000139104	-1.09482	-0.130692	1.09482	down	1.57671	0.656918	1.57671	up	-1.37005	-0.454228	1.37005	down	-1.02738	-0.0389639	1.02738	down	6872	Hs.158560	gb:M73444.1 /DB_XREF=gi:179989 /FEA=mRNA /CNT=1 /TID=Hs.1179.3 /TIER=ConsEnd /STK=0 /UG=Hs.1179 /LL=6872 /UG_GENE=TAF2A /UG_TITLE=TATA box binding protein (TBP)-associated factor, RNA polymerase II, A, 250kD /DEF=Human CCG1p mRNA, 5 flank.
TCAF1	204403_x_at	0.0190656	0.000140262	-1.11903	-0.162245	1.11903	down	1.02965	0.0421603	1.02965	up	-1.32007	-0.400615	1.32007	down	-1.58576	-0.665175	1.58576	down	9747	Hs.744048	gb:NM_014719.1 /DB_XREF=gi:7662275 /GEN=KIAA0738 /FEA=FLmRNA /CNT=60 /TID=Hs.107479.0 /TIER=FL /STK=3 /UG=Hs.107479 /LL=9747 /DEF=Homo sapiens KIAA0738 gene product (KIAA0738), mRNA. /PROD=KIAA0738 gene product /FL=gb:AB018281.1 gb:NM_014719.1
CHMP3///RNF103-CHMP3	222437_s_at	0.0190656	0.000140529	1.12458	0.169388	1.12458	up	1.78124	0.832885	1.78124	up	1.55475	0.636687	1.55475	up	1.34726	0.43003	1.34726	up	51652///100526767	Hs.591582	gb:BC004419.1 /DB_XREF=gi:13325201 /FEA=FLmRNA /CNT=201 /TID=Hs.189658.0 /TIER=FL+Stack /STK=48 /UG=Hs.189658 /LL=51652 /UG_GENE=LOC51652 /DEF=Homo sapiens, CGI-149 protein, clone MGC:11028, mRNA, complete cds. /PROD=CGI-149 protein /FL=gb:NM_016079.1 gb:AF151907.1 gb:AF219226.1 gb:BC004419.1
RHOQ	1559582_at	0.0190881	0.000141044	-1.26832	-0.342923	1.26832	down	2.62719	1.39352	2.62719	up	2.41554	1.27234	2.41554	up	1.13058	0.177063	1.13058	up	23433		gb:BC033251.1 /DB_XREF=gi:21619998 /TID=Hs2.375194.1 /CNT=5 /FEA=mRNA /TIER=ConsEnd /STK=0 /UG=Hs.375194 /UG_TITLE=Homo sapiens, clone IMAGE:5441133, mRNA /DEF=Homo sapiens, clone IMAGE:5441133, mRNA.
STYX	242408_at	0.0191421	0.000142411	-1.08344	-0.115621	1.08344	down	1.06473	0.0904828	1.06473	up	-1.25911	-0.332407	1.25911	down	1.92658	0.946044	1.92658	up	6815	Hs.364980	gb:AW968935 /DB_XREF=gi:8158776 /DB_XREF=EST381011 /FEA=EST /CNT=6 /TID=Hs.105219.0 /TIER=ConsEnd /STK=0 /UG=Hs.105219 /UG_TITLE=ESTs
BAP1	1555735_a_at	0.0191421	0.000142466	1.20552	0.269661	1.20552	up	1.52442	0.608258	1.52442	up	1.84819	0.886111	1.84819	up	2.22061	1.15095	2.22061	up	8314	Hs.106674	gb:AB002534.1 /DB_XREF=gi:13874440 /TID=Hs2.106674.2 /CNT=1 /FEA=FLmRNA /TIER=FL /STK=1 /LL=8314 /UG_GENE=BAP1 /UG=Hs.106674 /UG_TITLE=BRCA1 associated protein-1 (ubiquitin carboxy-terminal hydrolase) /DEF=Homo sapiens hucep-13 mRNA for cerebral protein-13, complete cds. /FL=gb:AB002534.1
XIAP	225859_at	0.0191421	0.000142837	1.30934	0.388842	1.30934	up	-1.83246	-0.873785	1.83246	down	-1.30149	-0.380164	1.30149	down	-1.02629	-0.0374451	1.02629	down	331	Hs.356076	gb:N30645 /DB_XREF=gi:1149165 /DB_XREF=yw77a07.s1 /CLONE=IMAGE:258228 /FEA=EST /CNT=68 /TID=Hs.321435.1 /TIER=Stack /STK=47 /UG=Hs.321435 /UG_TITLE=ESTs, Weakly similar to ALU1_HUMAN ALU SUBFAMILY J SEQUENCE CONTAMINATION WARNING ENTRY (H.sapiens)
HEXIM1	202815_s_at	0.0191421	0.000142843	-1.00358	-0.00515896	1.00358	down	-1.52969	-0.613236	1.52969	down	-1.36896	-0.453075	1.36896	down	-1.40974	-0.495428	1.40974	down	10614	Hs.741758	gb:NM_006460.1 /DB_XREF=gi:5453681 /GEN=HIS1 /FEA=FLmRNA /CNT=117 /TID=Hs.15299.0 /TIER=FL+Stack /STK=24 /UG=Hs.15299 /LL=10614 /DEF=Homo sapiens HMBA-inducible (HIS1), mRNA. /PROD=HMBA-inducible /FL=gb:NM_006460.1 gb:AB021179.1
ALMS1	214707_x_at	0.019165	0.000143365	-1.57036	-0.651098	1.57036	down	1.04633	0.0653398	1.04633	up	-1.2944	-0.372282	1.2944	down	-2.15237	-1.10592	2.15237	down	7840	Hs.184720	gb:AB002326.2 /DB_XREF=gi:6634016 /GEN=KIAA0328 /FEA=mRNA /CNT=43 /TID=Hs.97393.2 /TIER=ConsEnd /STK=0 /UG=Hs.97393 /LL=23147 /DEF=Homo sapiens mRNA for KIAA0328 protein, partial cds. /PROD=KIAA0328 protein
SMC3	209257_s_at	0.0191909	0.00014391	-1.36235	-0.446098	1.36235	down	-2.26137	-1.17719	2.26137	down	-6.58969	-2.72021	6.58969	down	-1.42234	-0.508266	1.42234	down	9126	Hs.24485	gb:BF795297 /DB_XREF=gi:12100351 /DB_XREF=602256270F1 /CLONE=IMAGE:4339721 /FEA=FLmRNA /CNT=124 /TID=Hs.24485.0 /TIER=Stack /STK=9 /UG=Hs.24485 /LL=9126 /UG_GENE=CSPG6 /UG_TITLE=chondroitin sulfate proteoglycan 6 (bamacan) /FL=gb:AF067163.1 gb:NM_005445.1 gb:AF020043.1
INPP4A	204553_x_at	0.0193066	0.000145964	1.07106	0.0990409	1.07106	up	-1.12383	-0.168429	1.12383	down	1.04301	0.0607515	1.04301	up	1.2076	0.272138	1.2076	up	3631	Hs.469386	gb:NM_004027.1 /DB_XREF=gi:4755139 /GEN=INPP4A /FEA=FLmRNA /CNT=53 /TID=Hs.32944.0 /TIER=FL /STK=0 /UG=Hs.32944 /LL=3631 /DEF=Homo sapiens inositol polyphosphate-4-phosphatase, type I, 107kD (INPP4A), transcript variant a, mRNA. /PROD=inositol polyphosphate-4-phosphatase isoform a /FL=gb:U26398.1 gb:NM_004027.1
LOC105377450///NAA15	1556382_a_at	0.0193066	0.000146734	-1.57084	-0.65154	1.57084	down	-1.2558	-0.328609	1.2558	down	-1.42356	-0.509508	1.42356	down	-1.53125	-0.614712	1.53125	down	80155///105377450	Hs.745047	gb:AK091308.1 /DB_XREF=gi:21749647 /TID=Hs2.118421.1 /CNT=6 /FEA=mRNA /TIER=ConsEnd /STK=3 /UG=Hs.118421 /UG_TITLE=Homo sapiens cDNA FLJ33989 fis, clone DFNES2006944. /DEF=Homo sapiens cDNA FLJ33989 fis, clone DFNES2006944.
SIK3	1563455_at	0.0193066	0.000146793	-1.69538	-0.761609	1.69538	down	1.20389	0.267709	1.20389	up	-1.4646	-0.550502	1.4646	down	-1.92524	-0.945038	1.92524	down	23387	Hs.167451	gb:AL832068.1 /DB_XREF=gi:21732609 /TID=Hs2.264450.1 /CNT=1 /FEA=mRNA /TIER=ConsEnd /STK=0 /UG=Hs.264450 /UG_TITLE=Homo sapiens mRNA; cDNA DKFZp313K0618 (from clone DKFZp313K0618) /DEF=Homo sapiens mRNA; cDNA DKFZp313K0618 (from clone DKFZp313K0618).
KLHDC3	214383_x_at	0.0193066	0.000146813	1.06177	0.0864686	1.06177	up	1.52572	0.60949	1.52572	up	1.52675	0.610466	1.52675	up	1.74756	0.805343	1.74756	up	116138	Hs.412468	gb:BF063121 /DB_XREF=gi:10822031 /DB_XREF=7h83f11.x1 /CLONE=IMAGE:3322605 /FEA=EST /CNT=8 /TID=Hs.281706.2 /TIER=Stack /STK=8 /UG=Hs.281706 /LL=6272 /UG_GENE=SORT1 /UG_TITLE=sortilin 1
ENSA	221487_s_at	0.0193066	0.000147177	1.04945	0.06963	1.04945	up	1.06697	0.0935222	1.06697	up	-1.38744	-0.472425	1.38744	down	1.70675	0.771249	1.70675	up	2029	Hs.632456	gb:AF157510.1 /DB_XREF=gi:8886010 /FEA=FLmRNA /CNT=217 /TID=Hs.111680.1 /TIER=FL /STK=6 /UG=Hs.111680 /LL=2029 /UG_GENE=ENSA /DEF=Homo sapiens beta endosulfine mRNA, complete cds. /PROD=beta endosulfine /FL=gb:AF067170.1 gb:AF157510.1
STAT5B	1555088_x_at	0.0193066	0.000147197	-1.02163	-0.0308782	1.02163	down	2.06401	1.04545	2.06401	up	1.19503	0.257043	1.19503	up	-1.15077	-0.202606	1.15077	down	6777	Hs.595276	gb:BC020868.1 /DB_XREF=gi:18088755 /TID=Hs2.244613.2 /CNT=2 /FEA=FLmRNA /TIER=FL /STK=1 /LL=6777 /UG_GENE=STAT5B /UG=Hs.244613 /DEF=Homo sapiens, Similar to signal transducer and activator of transcription 5B, clone MGC:24071 IMAGE:4605440, mRNA, complete cds. /PROD=Similar to signal transducer and activator oftranscription 5B /FL=gb:BC020868.1
LOC100506248///LOC728026///PTMA///PTMAP5	216384_x_at	0.0193066	0.000147249	-1.27675	-0.352473	1.27675	down	-2.26689	-1.18071	2.26689	down	-1.69536	-0.761589	1.69536	down	-1.54312	-0.625853	1.54312	down	5757///150928///728026///100506248		gb:AF257099 /DB_XREF=gi:8037944 /FEA=DNA /CNT=1 /TID=Hs.283947.0 /TIER=ConsEnd /STK=0 /UG=Hs.283947 /UG_TITLE=Homo sapiens prothymosin alpha (PTMA) gene, complete cds /DEF=Homo sapiens prothymosin alpha (PTMA) gene, complete cds
ARRB1	43511_s_at	0.0193434	0.000147967	1.20505	0.26909	1.20505	up	1.45359	0.539622	1.45359	up	1.83719	0.877501	1.83719	up	1.33292	0.414585	1.33292	up	408	Hs.503284	Cluster Incl. AI201594:qc02h12.x1 Homo sapiens cDNA, 3 end /clone=IMAGE-1708487 /clone_end=3' /gb=AI201594 /gi=3754200 /ug=Hs.239333 /len=591
KDM4B	212495_at	0.0193434	0.000148238	1.2894	0.366703	1.2894	up	1.49277	0.577996	1.49277	up	1.81284	0.858254	1.81284	up	1.58725	0.666527	1.58725	up	23030	Hs.654816	gb:BE256900 /DB_XREF=gi:9127367 /DB_XREF=601112063F1 /CLONE=IMAGE:3352887 /FEA=mRNA /CNT=167 /TID=Hs.301011.0 /TIER=Stack /STK=90 /UG=Hs.301011 /LL=23030 /UG_GENE=KIAA0876 /UG_TITLE=KIAA0876 protein
	233816_at	0.0193957	0.000149397	-1.16484	-0.220126	1.16484	down	1.98699	0.990587	1.98699	up	1.01949	0.0278525	1.01949	up	-1.22132	-0.288444	1.22132	down		Hs.675123	gb:AW668617 /DB_XREF=gi:7524021 /DB_XREF=ZA32 /FEA=mRNA /CNT=2 /TID=Hs.259637.0 /TIER=ConsEnd /STK=0 /UG=Hs.259637 /UG_TITLE=Homo sapiens uncharacterized gastric protein ZA32P mRNA, partial cds
PTPN18	1569552_at	0.0193957	0.000149835	1.03984	0.0563674	1.03984	up	4.0478	2.01714	4.0478	up	2.4506	1.29313	2.4506	up	2.19843	1.13647	2.19843	up	26469		gb:BC031076.1 /DB_XREF=gi:21410312 /TID=Hs2.382637.1 /CNT=3 /FEA=mRNA /TIER=ConsEnd /STK=0 /UG=Hs.382637 /UG_TITLE=Homo sapiens, clone IMAGE:5277075, mRNA /DEF=Homo sapiens, clone IMAGE:5277075, mRNA.
CSNK2A1	212075_s_at	0.0193957	0.000150052	-1.05259	-0.0739486	1.05259	down	1.22512	0.292926	1.22512	up	-1.02535	-0.0361156	1.02535	down	1.39413	0.479365	1.39413	up	1457	Hs.644056	gb:AI161318 /DB_XREF=gi:3694562 /DB_XREF=qb66g02.x1 /CLONE=IMAGE:1705106 /FEA=DNA_2 /CNT=222 /TID=Hs.155140.3 /TIER=Stack /STK=17 /UG=Hs.155140 /LL=1457 /UG_GENE=CSNK2A1 /UG_TITLE=casein kinase 2, alpha 1 polypeptide
AMZ2P1	223443_s_at	0.0193957	0.000150057	-1.05018	-0.0706326	1.05018	down	-1.77409	-0.82708	1.77409	down	-1.89087	-0.919053	1.89087	down	-1.37842	-0.463011	1.37842	down	201283	Hs.396447	gb:BC003669.1 /DB_XREF=gi:13277529 /FEA=FLmRNA /CNT=51 /TID=Hs.268122.1 /TIER=FL /STK=0 /UG=Hs.268122 /LL=51321 /UG_GENE=LOC51321 /DEF=Homo sapiens, clone MGC:12196, mRNA, complete cds. /PROD=Unknown (protein for MGC:12196) /FL=gb:BC003669.1
POLR2L	211730_s_at	0.0195512	0.000151618	-1.24487	-0.315996	1.24487	down	1.21767	0.284121	1.21767	up	1.14775	0.198807	1.14775	up	1.66584	0.73625	1.66584	up	5441	Hs.441072	gb:BC005903.1 /DB_XREF=gi:13543491 /FEA=FLmRNA /CNT=1 /TID=HsAffx.900752.298 /TIER=FL /STK=0 /DEF=Homo sapiens, polymerase (RNA) II (DNA directed) polypeptide L (7.6kD), clone MGC:14494, mRNA, complete cds. /PROD=polymerase (RNA) II (DNA directed) polypeptide L(7.6kD) /FL=gb:BC005903.1
SSFA2	236207_at	0.0196248	0.000152999	-1.11177	-0.152853	1.11177	down	-1.00141	-0.00203547	1.00141	down	-1.17431	-0.23181	1.17431	down	1.41573	0.501549	1.41573	up	6744	Hs.196983	gb:BE083088 /DB_XREF=gi:8473396 /DB_XREF=RC2-BT0642-030400-021-c05 /FEA=EST /CNT=14 /TID=Hs.116790.0 /TIER=ConsEnd /STK=0 /UG=Hs.116790 /UG_TITLE=ESTs, Weakly similar to KIAA0748 protein (H.sapiens)
	238611_at	0.0196248	0.000153082	-1.25094	-0.323018	1.25094	down	-1.67641	-0.745376	1.67641	down	-2.41198	-1.27022	2.41198	down	-2.45478	-1.29559	2.45478	down		Hs.660616	gb:AI906424 /DB_XREF=gi:6496811 /DB_XREF=RC-BT108-140399-083 /FEA=EST /CNT=9 /TID=Hs.225026.0 /TIER=ConsEnd /STK=0 /UG=Hs.225026 /UG_TITLE=ESTs
	240291_at	0.0196248	0.000153265	-1.07447	-0.103625	1.07447	down	1.18651	0.246727	1.18651	up	1.17978	0.238523	1.17978	up	1.15069	0.202496	1.15069	up		Hs.667991	gb:BF513295 /DB_XREF=gi:11598474 /DB_XREF=UI-H-BW1-amo-f-10-0-UI.s1 /CLONE=IMAGE:3070626 /FEA=EST /CNT=5 /TID=Hs.148382.0 /TIER=ConsEnd /STK=4 /UG=Hs.148382 /UG_TITLE=ESTs
	1561909_at	0.0197183	0.000154667	-1.19412	-0.255944	1.19412	down	-1.11023	-0.150861	1.11023	down	-1.18345	-0.243003	1.18345	down	-1.3313	-0.41284	1.3313	down			gb:BC041064.1 /DB_XREF=gi:26996654 /TID=Hs2.434413.1 /CNT=4 /FEA=mRNA /TIER=ConsEnd /STK=0 /UG=Hs.434413 /UG_TITLE=Homo sapiens, clone IMAGE:5466006, mRNA /DEF=Homo sapiens, clone IMAGE:5466006, mRNA.
	1566486_at	0.0197183	0.000154717	-1.16503	-0.220369	1.16503	down	-1.12881	-0.174807	1.12881	down	-1.04351	-0.0614465	1.04351	down	-1.23958	-0.309852	1.23958	down		Hs.676445	gb:AL359607.1 /DB_XREF=gi:8655675 /TID=Hs2.375683.1 /CNT=1 /FEA=mRNA /TIER=ConsEnd /STK=0 /UG=Hs.375683 /UG_TITLE=Homo sapiens mRNA; cDNA DKFZp547M116 (from clone DKFZp547M116) /DEF=Homo sapiens mRNA; cDNA DKFZp547M116 (from clone DKFZp547M116).
CWC15	223067_at	0.0197768	0.000155643	-1.06157	-0.086206	1.06157	down	-1.65686	-0.728448	1.65686	down	-1.71777	-0.780533	1.71777	down	-1.41819	-0.504054	1.41819	down	51503	Hs.503597	gb:AF110775.1 /DB_XREF=gi:6523796 /FEA=FLmRNA /CNT=210 /TID=Hs.42743.0 /TIER=FL+Stack /STK=95 /UG=Hs.42743 /LL=51503 /UG_GENE=HSPC148 /DEF=Homo sapiens adrenal gland protein AD-002 mRNA, complete cds. /PROD=adrenal gland protein AD-002 /FL=gb:NM_016403.1 gb:AF110775.1 gb:AF161497.1
	233427_x_at	0.0197768	0.000155899	-1.2601	-0.333534	1.2601	down	1.09297	0.128259	1.09297	up	-1.16041	-0.214638	1.16041	down	-1.72551	-0.787027	1.72551	down		Hs.661071	gb:AK023870.1 /DB_XREF=gi:10435938 /FEA=mRNA /CNT=3 /TID=Hs.287598.0 /TIER=ConsEnd /STK=0 /UG=Hs.287598 /UG_TITLE=Homo sapiens cDNA FLJ13808 fis, clone THYRO1000253 /DEF=Homo sapiens cDNA FLJ13808 fis, clone THYRO1000253.
IDS	210666_at	0.0200267	0.000158615	1.06393	0.0894088	1.06393	up	1.45931	0.545288	1.45931	up	-1.19825	-0.260934	1.19825	down	-1.34654	-0.429257	1.34654	down	3423		gb:AF050145.1 /DB_XREF=gi:2970558 /GEN=IDS /FEA=FLmRNA /CNT=4 /TID=Hs.172458.2 /TIER=FL /STK=0 /UG=Hs.172458 /LL=3423 /DEF=Homo sapiens iduronate-2-sulfatase (IDS) mRNA, complete cds. /PROD=iduronate-2-sulfatase /FL=gb:AF050145.1
ITGB3	204627_s_at	0.0200267	0.000158903	-1.25966	-0.333034	1.25966	down	5.52483	2.46593	5.52483	up	2.86559	1.51883	2.86559	up	10.0784	3.33319	10.0784	up	3690	Hs.218040	gb:M35999.1 /DB_XREF=gi:183532 /FEA=FLmRNA /CNT=66 /TID=Hs.87149.0 /TIER=FL /STK=0 /UG=Hs.87149 /LL=3690 /UG_GENE=ITGB3 /UG_TITLE=integrin, beta 3 (platelet glycoprotein IIIa, antigen CD61) /DEF=Human platelet glycoprotein IIIa (GPIIIa) mRNA, complete cds. /FL=gb:J02703.1 gb:M35999.1 gb:M20311.1 gb:NM_000212.1
INIP	239363_at	0.0200267	0.000158969	1.14978	0.201356	1.14978	up	1.88011	0.910813	1.88011	up	-1.02317	-0.0330509	1.02317	down	1.36282	0.446598	1.36282	up	58493		gb:BE328720 /DB_XREF=gi:9202496 /DB_XREF=ht03g04.x1 /CLONE=IMAGE:3145686 /FEA=EST /CNT=5 /TID=Hs.280651.0 /TIER=ConsEnd /STK=4 /UG=Hs.280651 /UG_TITLE=ESTs
ZMAT3	1555609_a_at	0.020079	0.000159751	-1.26929	-0.344023	1.26929	down	1.00206	0.00296278	1.00206	up	1.05045	0.071014	1.05045	up	1.71555	0.778674	1.71555	up	64393	Hs.371609	gb:AF355465.1 /DB_XREF=gi:15077640 /TID=Hs2.252406.3 /CNT=1 /FEA=FLmRNA /TIER=FL /STK=1 /LL=64393 /UG_GENE=WIG1 /UG=Hs.252406 /DEF=Homo sapiens WIG-1PAG608 protein mRNA, complete cds. /PROD=WIG-1PAG608 protein /FL=gb:AF355465.1
XPO7	212166_at	0.0202106	0.000161167	1.05803	0.0813787	1.05803	up	1.17463	0.232203	1.17463	up	1.34961	0.432544	1.34961	up	1.31724	0.397519	1.31724	up	23039	Hs.172685	gb:H38643 /DB_XREF=gi:908142 /DB_XREF=yp62f02.s1 /CLONE=IMAGE:192027 /FEA=mRNA /CNT=274 /TID=Hs.172685.0 /TIER=Stack /STK=8 /UG=Hs.172685 /LL=23039 /UG_GENE=RANBP16 /UG_TITLE=RAN binding protein 16
NUDT3	211976_at	0.0202136	0.000161561	1.06295	0.0880744	1.06295	up	1.45472	0.540743	1.45472	up	1.80147	0.849179	1.80147	up	1.42439	0.510341	1.42439	up	11165	Hs.743967	gb:AK026168.1 /DB_XREF=gi:10438931 /FEA=mRNA /CNT=414 /TID=Hs.188882.0 /TIER=Stack /STK=118 /UG=Hs.188882 /UG_TITLE=Homo sapiens cDNA: FLJ21862 fis, clone HEP02321, highly similar to AF052101 Homo sapiens clone 23872 mRNA sequence /DEF=Homo sapiens cDNA: FLJ22515 fis, clone HRC12122, highly similar to AF052101 Homo sapiens clone 23872 mRNA sequence.
CSAD	1568620_at	0.0202212	0.000161991	-1.03067	-0.0435801	1.03067	down	2.09332	1.06579	2.09332	up	1.15367	0.206232	1.15367	up	1.1782	0.23658	1.1782	up	51380		gb:BC018042.1 /DB_XREF=gi:22450822 /TID=Hs2.407179.1 /CNT=12 /FEA=mRNA /TIER=Stack /STK=8 /UG=Hs.407179 /UG_TITLE=Homo sapiens, clone IMAGE:4816848, mRNA /DEF=Homo sapiens, clone IMAGE:4816848, mRNA.
PTMAP1	217166_at	0.0204442	0.000164164	-1.14001	-0.189051	1.14001	down	-1.40504	-0.490606	1.40504	down	1.07221	0.100592	1.07221	up	-1.05608	-0.0787182	1.05608	down	5758		gb:J04798 /DB_XREF=gi:190368 /FEA=DNA /CNT=1 /TID=Hs.247931.0 /TIER=ConsEnd /STK=0 /UG=Hs.247931 /UG_TITLE=Human prothymosin-alpha pseudogene, complete sequence /DEF=Human prothymosin-alpha pseudogene, complete sequence
CAMKK2	213812_s_at	0.0204442	0.000164526	1.17468	0.232271	1.17468	up	2.46337	1.30063	2.46337	up	1.13232	0.179278	1.13232	up	1.11528	0.1574	1.11528	up	10645	Hs.297343	gb:AK024748.1 /DB_XREF=gi:10437113 /FEA=mRNA /CNT=29 /TID=Hs.108708.2 /TIER=Stack /STK=16 /UG=Hs.108708 /LL=10645 /UG_GENE=CAMKK2 /UG_TITLE=calciumcalmodulin-dependent protein kinase kinase 2, beta /DEF=Homo sapiens cDNA: FLJ21095 fis, clone CAS03846.
NSFL1C	232520_s_at	0.0204867	0.000165392	1.13606	0.184038	1.13606	up	1.6346	0.70894	1.6346	up	1.23949	0.309746	1.23949	up	1.34676	0.429492	1.34676	up	55968	Hs.12865	gb:AK023585.1 /DB_XREF=gi:10435562 /FEA=mRNA /CNT=8 /TID=Hs.12865.1 /TIER=ConsEnd /STK=0 /UG=Hs.12865 /LL=51674 /UG_GENE=LOC51674 /UG_TITLE=p47 /DEF=Homo sapiens cDNA FLJ13523 fis, clone PLACE1005968.
ARRB1	49111_at	0.0204867	0.000165618	1.18683	0.247113	1.18683	up	1.40098	0.486436	1.40098	up	1.87121	0.903969	1.87121	up	1.3837	0.468527	1.3837	up	408	Hs.503284	Cluster Incl. N80935:zb07g06.s1 Homo sapiens cDNA, 3 end /clone=IMAGE-301402 /clone_end=3' /gb=N80935 /gi=1243636 /ug=Hs.22483 /len=527
C9orf64	223697_x_at	0.0205436	0.00016681	-1.31566	-0.395788	1.31566	down	1.14079	0.190032	1.14079	up	-1.11544	-0.157611	1.11544	down	-2.09375	-1.06609	2.09375	down	84267	Hs.208914	gb:BC004407.1 /DB_XREF=gi:13325177 /FEA=FLmRNA /CNT=13 /TID=Hs.208914.0 /TIER=FL /STK=0 /UG=Hs.208914 /DEF=Homo sapiens, Similar to RIKEN cDNA 2210016F16 gene, clone MGC:10999, mRNA, complete cds. /PROD=Similar to RIKEN cDNA 2210016F16 gene /FL=gb:BC004407.1
	207953_at	0.0205436	0.000166828	-1.27957	-0.35566	1.27957	down	1.2192	0.285937	1.2192	up	-1.05692	-0.0798634	1.05692	down	-1.59704	-0.675403	1.59704	down			gb:AF010144.1 /DB_XREF=gi:3002526 /FEA=FLmRNA /CNT=2 /TID=Hs.129735.0 /TIER=ConsEnd /STK=0 /UG=Hs.129735 /LL=27308 /UG_GENE=AD7C-NTP /DEF=Homo sapiens neuronal thread protein AD7c-NTP mRNA, complete cds. /PROD=neuronal thread protein AD7c-NTP /FL=gb:NM_014486.1 gb:AF010144.1
PRPF40A	214941_s_at	0.0206081	0.00016773	-1.19612	-0.258362	1.19612	down	-1.20606	-0.270297	1.20606	down	-1.77392	-0.826944	1.77392	down	-1.26374	-0.337694	1.26374	down	55660	Hs.643580	gb:AA675900 /DB_XREF=gi:2775247 /DB_XREF=g02504r /CLONE=g02504 /FEA=mRNA /CNT=8 /TID=Hs.119325.1 /TIER=ConsEnd /STK=0 /UG=Hs.119325 /LL=25768 /UG_GENE=HYPA /UG_TITLE=Huntingtin-interacting protein A
DDX3X	201211_s_at	0.0207167	0.00016912	-1.24446	-0.315525	1.24446	down	1.01875	0.0267968	1.01875	up	1.31481	0.394852	1.31481	up	2.58638	1.37094	2.58638	up	1654	Hs.743263	gb:AF061337.1 /DB_XREF=gi:3523149 /GEN=DDX3 /FEA=FLmRNA /CNT=278 /TID=Hs.147916.0 /TIER=FL /STK=0 /UG=Hs.147916 /LL=1654 /DEF=Homo sapiens DEAD box RNA helicase DDX3 (DDX3) mRNA, complete cds. /PROD=DEAD box RNA helicase DDX3 /FL=gb:U50553.1 gb:NM_001356.2 gb:AF000982.1 gb:AF061337.1
EFCAB14	201775_s_at	0.0207167	0.00016952	1.0258	0.0367509	1.0258	up	1.28314	0.359681	1.28314	up	1.09742	0.13412	1.09742	up	1.49761	0.582662	1.49761	up	9813	Hs.707688	gb:AA676790 /DB_XREF=gi:2657312 /DB_XREF=zj64h12.s1 /CLONE=IMAGE:455111 /FEA=FLmRNA /CNT=279 /TID=Hs.62515.0 /TIER=Stack /STK=12 /UG=Hs.62515 /LL=9813 /UG_GENE=KIAA0494 /UG_TITLE=KIAA0494 gene product /FL=gb:AB007963.1 gb:BC002525.1 gb:NM_014774.1
SERINC3	221472_at	0.0207167	0.00016975	1.20389	0.267706	1.20389	up	1.61568	0.692137	1.61568	up	1.68694	0.754405	1.68694	up	1.5573	0.639046	1.5573	up	10955		gb:Z97053 /DB_XREF=gi:9650676 /FEA=FLmRNA /CNT=404 /TID=Hs.272168.0 /TIER=Stack /STK=64 /UG=Hs.272168 /LL=10955 /UG_GENE=TDE1 /UG_TITLE=tumor differentially expressed 1 /DEF=Human DNA sequence from clone RP1-179M20 on chromosome 20 Contains a 3 end of a novel gene similar to cellular retinaldehyde-binding protein, the TDE1 gene (Tumour differentially expressed 1), the PKIG gene encoding protein k…
BBIP1	228993_s_at	0.0207483	0.000170389	-1.05183	-0.0729075	1.05183	down	-2.14798	-1.10298	2.14798	down	-2.62995	-1.39504	2.62995	down	-3.1639	-1.66171	3.1639	down	92482	Hs.232543	gb:AV728606 /DB_XREF=gi:10838027 /DB_XREF=AV728606 /CLONE=HTCCGE10 /FEA=EST /CNT=20 /TID=Hs.326248.0 /TIER=Stack /STK=10 /UG=Hs.326248 /UG_TITLE=Homo sapiens cDNA: FLJ22071 fis, clone HEP11691
TMCO3	226050_at	0.0209053	0.00017206	1.45957	0.545542	1.45957	up	2.30076	1.20211	2.30076	up	2.34144	1.2274	2.34144	up	3.35668	1.74703	3.35668	up	55002	Hs.317593	gb:AL576117 /DB_XREF=gi:12937943 /DB_XREF=AL576117 /CLONE=CS0DI072YH14 (3 prime) /FEA=EST /CNT=55 /TID=Hs.27337.1 /TIER=Stack /STK=26 /UG=Hs.27337 /LL=55002 /UG_GENE=FLJ20623 /UG_TITLE=hypothetical protein FLJ20623
C5orf58	1554115_at	0.0209501	0.000173485	-1.28762	-0.36471	1.28762	down	-1.29994	-0.378447	1.29994	down	-1.08092	-0.112254	1.08092	down	-1.34632	-0.429022	1.34632	down	133874		gb:BC030767.1 /DB_XREF=gi:21315031 /TID=Hs2.22068.1 /CNT=7 /FEA=FLmRNA /TIER=FL /STK=4 /UG=Hs.22068 /DEF=Homo sapiens, Similar to hypothetical gene LOC133874, clone MGC:42229 IMAGE:4812742, mRNA, complete cds. /PROD=Similar to hypothetical gene LOC133874 /FL=gb:BC030767.1
LINC00487	231455_at	0.0209501	0.000173541	1.71738	0.780212	1.71738	up	-2.37736	-1.24936	2.37736	down	-2.46308	-1.30046	2.46308	down	-2.36634	-1.24266	2.36634	down	400941	Hs.446195	gb:AA768888 /DB_XREF=gi:2820126 /DB_XREF=nz82e11.s1 /CLONE=IMAGE:1301996 /FEA=EST /CNT=9 /TID=Hs.121106.0 /TIER=Stack /STK=9 /UG=Hs.121106 /UG_TITLE=ESTs
AGO4	227930_at	0.0209501	0.000173633	1.5084	0.593023	1.5084	up	2.32596	1.21783	2.32596	up	2.52805	1.33802	2.52805	up	2.133	1.09288	2.133	up	192670	Hs.744858	gb:AI669957 /DB_XREF=gi:4834731 /DB_XREF=wc11b01.x1 /CLONE=IMAGE:2314825 /FEA=EST /CNT=32 /TID=Hs.21887.0 /TIER=Stack /STK=14 /UG=Hs.21887 /UG_TITLE=ESTs, Moderately similar to ALU7_HUMAN ALU SUBFAMILY SQ SEQUENCE CONTAMINATION WARNING ENTRY (H.sapiens)
RABGGTB	209181_s_at	0.0209501	0.000173961	1.04347	0.0613838	1.04347	up	-2.41589	-1.27255	2.41589	down	-1.68307	-0.751096	1.68307	down	-1.77008	-0.823811	1.77008	down	5876	Hs.78948	gb:U49245.1 /DB_XREF=gi:1216503 /FEA=FLmRNA /CNT=174 /TID=Hs.78948.0 /TIER=FL+Stack /STK=72 /UG=Hs.78948 /LL=5876 /UG_GENE=RABGGTB /DEF=Human geranylgeranyl transferase type II beta-subunit mRNA, complete cds. /PROD=geranylgeranyl transferase type II beta-subunit /FL=gb:U49245.1 gb:NM_004582.1
DAPP1	236707_at	0.0210338	0.000175714	-1.2945	-0.3724	1.2945	down	1.93014	0.948705	1.93014	up	-1.12903	-0.175087	1.12903	down	-1.08137	-0.112857	1.08137	down	27071		gb:AA521016 /DB_XREF=gi:2261559 /DB_XREF=aa70f04.s1 /CLONE=IMAGE:826303 /FEA=EST /CNT=9 /TID=Hs.185375.0 /TIER=ConsEnd /STK=7 /UG=Hs.185375 /UG_TITLE=ESTs
	240569_at	0.0210338	0.0001758	1.63757	0.711559	1.63757	up	9.29231	3.21604	9.29231	up	4.06604	2.02362	4.06604	up	3.90012	1.96352	3.90012	up		Hs.595979	gb:AV688087 /DB_XREF=gi:10289950 /DB_XREF=AV688087 /CLONE=GKCDMG10 /FEA=EST /CNT=8 /TID=Hs.16247.0 /TIER=ConsEnd /STK=4 /UG=Hs.16247 /UG_TITLE=ESTs
	239857_at	0.0210338	0.000175811	1.04635	0.0653611	1.04635	up	-1.31548	-0.395588	1.31548	down	-1.43087	-0.516889	1.43087	down	-1.74073	-0.799695	1.74073	down		Hs.721259	gb:BF940997 /DB_XREF=gi:12358317 /DB_XREF=hu62h09.x1 /CLONE=IMAGE:3174784 /FEA=EST /CNT=5 /TID=Hs.202398.0 /TIER=ConsEnd /STK=4 /UG=Hs.202398 /UG_TITLE=ESTs
RBPJ	211974_x_at	0.0210667	0.000176824	1.21358	0.279267	1.21358	up	2.20347	1.13977	2.20347	up	1.78094	0.83264	1.78094	up	1.56667	0.647703	1.56667	up	3516	Hs.479396	gb:AL513759 /DB_XREF=gi:12777253 /DB_XREF=AL513759 /CLONE=CL0BA008ZD02 (3 prime) /FEA=EST /CNT=299 /TID=Hs.278573.0 /TIER=Stack /STK=45 /UG=Hs.278573 /UG_TITLE=Homo sapiens similar to J KAPPA-RECOMBINATION SIGNAL BINDING PROTEIN (M. musculus) (LOC65437), mRNA
RGS1	216834_at	0.0210667	0.000176856	-1.10017	-0.137728	1.10017	down	-14.774	-3.88499	14.774	down	-6.7599	-2.757	6.7599	down	-6.72995	-2.75059	6.72995	down	5996		gb:S59049.1 /DB_XREF=gi:299704 /GEN=BL34 /FEA=mRNA /CNT=1 /TID=Hs.75256.1 /TIER=ConsEnd /STK=0 /UG=Hs.75256 /LL=5996 /UG_TITLE=regulator of G-protein signalling 1 /DEF=BL34=B cell activation gene (human, mRNA, 1398 nt).
GNAQ	211426_x_at	0.0211843	0.000178256	-1.22916	-0.297667	1.22916	down	1.40916	0.494836	1.40916	up	1.27177	0.346843	1.27177	up	1.71326	0.776746	1.71326	up	2776	Hs.269782	gb:U40038.1 /DB_XREF=gi:1181670 /GEN=GNAQ /FEA=FLmRNA /CNT=1 /TID=Hs.296261.1 /TIER=FL /STK=0 /UG=Hs.296261 /LL=2776 /DEF=Human GTP-binding protein alpha q subunit (GNAQ) mRNA, complete cds. /PROD=GTP-binding protein alpha q subunit /FL=gb:U40038.1
BRD7	238545_at	0.0211843	0.000178907	-1.11868	-0.161794	1.11868	down	-2.59385	-1.3751	2.59385	down	-1.57739	-0.657538	1.57739	down	-2.57273	-1.3633	2.57273	down	29117		gb:AA214369 /DB_XREF=gi:1813005 /DB_XREF=zq92c06.s1 /CLONE=IMAGE:649450 /FEA=EST /CNT=8 /TID=Hs.92888.0 /TIER=ConsEnd /STK=1 /UG=Hs.92888 /UG_TITLE=ESTs, Highly similar to CYA7_HUMAN ADENYLATE CYCLASE, TYPE VII (H.sapiens)
SPINT2	210715_s_at	0.0211843	0.000179282	-1.17936	-0.238009	1.17936	down	1.64486	0.717962	1.64486	up	1.72351	0.785351	1.72351	up	2.04846	1.03454	2.04846	up	10653	Hs.31439	gb:AF027205.1 /DB_XREF=gi:2598967 /GEN=kop /FEA=FLmRNA /CNT=3 /TID=Hs.31439.1 /TIER=FL /STK=0 /UG=Hs.31439 /LL=10653 /DEF=Homo sapiens Kunitz-type protease inhibitor (kop) mRNA, complete cds. /PROD=Kunitz-type protease inhibitor /FL=gb:AF027205.1
SF3B1	201070_x_at	0.0211843	0.000179393	-1.09431	-0.130018	1.09431	down	1.29991	0.378412	1.29991	up	-2.0205	-1.01471	2.0205	down	-1.41242	-0.498167	1.41242	down	23451	Hs.632554	gb:AI739389 /DB_XREF=gi:5101370 /DB_XREF=wi29f09.x1 /CLONE=IMAGE:2391689 /FEA=FLmRNA /CNT=314 /TID=Hs.13453.0 /TIER=Stack /STK=37 /UG=Hs.13453 /LL=23451 /UG_GENE=SF3B1 /UG_TITLE=splicing factor 3b, subunit 1, 155kD /FL=gb:NM_012433.1 gb:AF054284.1
PLEKHA2	238013_at	0.0211968	0.000181019	-1.10121	-0.139093	1.10121	down	-2.22512	-1.15388	2.22512	down	-4.25009	-2.08749	4.25009	down	-1.79069	-0.840515	1.79069	down	59339	Hs.369123	gb:BF347859 /DB_XREF=gi:11295454 /DB_XREF=602023010F1 /CLONE=IMAGE:4158291 /FEA=EST /CNT=14 /TID=Hs.190785.0 /TIER=ConsEnd /STK=0 /UG=Hs.190785 /UG_TITLE=ESTs
	217715_x_at	0.0211968	0.000181351	-1.25764	-0.330719	1.25764	down	-1.01586	-0.0227036	1.01586	down	-1.15625	-0.20945	1.15625	down	-1.78722	-0.837718	1.78722	down			gb:BE045142 /DB_XREF=gi:8362195 /DB_XREF=hn26h02.x1 /CLONE=IMAGE:3023283 /FEA=EST /CNT=3 /TID=Hs.274907.0 /TIER=ConsEnd /STK=3 /UG=Hs.274907 /UG_TITLE=ESTs
RNF41	201961_s_at	0.0211968	0.000181488	1.0558	0.0783402	1.0558	up	1.76866	0.822658	1.76866	up	1.21502	0.28098	1.21502	up	1.52744	0.61112	1.52744	up	10193	Hs.524502	gb:AL583171 /DB_XREF=gi:12951876 /DB_XREF=AL583171 /CLONE=CS0DL009YA21 (3 prime) /FEA=FLmRNA /CNT=174 /TID=Hs.153639.0 /TIER=Stack /STK=31 /UG=Hs.153639 /LL=10193 /UG_GENE=SBB103 /UG_TITLE=hypothetical SBBI03 protein /FL=gb:NM_005785.1 gb:AF077599.1
	230618_s_at	0.0211968	0.000182084	1.34724	0.43001	1.34724	up	-1.82864	-0.870773	1.82864	down	-2.69874	-1.43228	2.69874	down	-2.95897	-1.56509	2.95897	down		Hs.712903	gb:BF110903 /DB_XREF=gi:10940593 /DB_XREF=7n41g11.x1 /CLONE=IMAGE:3567189 /FEA=EST /CNT=12 /TID=Hs.69559.1 /TIER=Stack /STK=12 /UG=Hs.69559 /LL=23215 /UG_GENE=KIAA1096 /UG_TITLE=KIAA1096 protein
	233041_x_at	0.0211968	0.000182093	-1.31144	-0.391148	1.31144	down	1.04747	0.0669053	1.04747	up	-1.2038	-0.267596	1.2038	down	-1.99525	-0.996571	1.99525	down		Hs.677311	gb:AK025009.1 /DB_XREF=gi:10437442 /FEA=mRNA /CNT=5 /TID=Hs.270487.0 /TIER=ConsEnd /STK=0 /UG=Hs.270487 /UG_TITLE=Homo sapiens cDNA: FLJ21356 fis, clone COL02831 /DEF=Homo sapiens cDNA: FLJ21356 fis, clone COL02831.
COA1	209445_x_at	0.0211968	0.000182661	-1.24799	-0.319612	1.24799	down	-2.35402	-1.23513	2.35402	down	-2.10954	-1.07693	2.10954	down	-1.81946	-0.863508	1.81946	down	55744	Hs.654779///Hs.655165	gb:AI765280 /DB_XREF=gi:5231789 /DB_XREF=wi73a08.x1 /CLONE=IMAGE:2398934 /FEA=FLmRNA /CNT=92 /TID=Hs.8173.1 /TIER=Stack /STK=58 /UG=Hs.8173 /LL=55744 /UG_GENE=FLJ10803 /UG_TITLE=hypothetical protein FLJ10803 /FL=gb:BC001743.1
TRAK2	202124_s_at	0.0211968	0.000182792	-1.27665	-0.35236	1.27665	down	1.11562	0.157851	1.11562	up	-2.72611	-1.44684	2.72611	down	-1.8697	-0.902807	1.8697	down	66008	Hs.152774	gb:AV705253 /DB_XREF=gi:10722559 /DB_XREF=AV705253 /CLONE=ADBBQF03 /FEA=FLmRNA /CNT=253 /TID=Hs.154248.0 /TIER=Stack /STK=47 /UG=Hs.154248 /LL=66008 /UG_GENE=ALS2CR3 /UG_TITLE=amyotrophic lateral sclerosis 2 (juvenile) chromosome region, candidate 3 /FL=gb:AB038951.1 gb:NM_015049.1
GNL3L	46947_at	0.0211968	0.000182819	-1.08796	-0.121624	1.08796	down	1.57134	0.652	1.57134	up	-1.61095	-0.687912	1.61095	down	1.24263	0.3134	1.24263	up	54552	Hs.654677	Cluster Incl. T87245:yd91b02.r1 Homo sapiens cDNA, 5 end /clone=IMAGE-115563 /clone_end=5' /gb=T87245 /gi=715597 /ug=Hs.16336 /len=412
PGS1	226266_at	0.0211968	0.000182989	-1.2138	-0.279528	1.2138	down	3.44078	1.78274	3.44078	up	1.90283	0.928143	1.90283	up	2.47671	1.30843	2.47671	up	9489	Hs.654671	gb:BF001889 /DB_XREF=gi:10702164 /DB_XREF=7g95a02.x1 /CLONE=IMAGE:3314186 /FEA=mRNA /CNT=63 /TID=Hs.162604.0 /TIER=Stack /STK=39 /UG=Hs.162604 /LL=55528 /UG_GENE=DKFZp762M186 /UG_TITLE=hypothetical protein DKFZp762M186
LRRFIP1	227513_s_at	0.0212001	0.00018404	-1.12064	-0.164319	1.12064	down	-1.3135	-0.393413	1.3135	down	-1.44751	-0.53357	1.44751	down	-1.4555	-0.541515	1.4555	down	9208	Hs.471779	gb:AW027170 /DB_XREF=gi:5885926 /DB_XREF=wt72c06.x1 /CLONE=IMAGE:2513002 /FEA=EST /CNT=30 /TID=Hs.326159.3 /TIER=Stack /STK=23 /UG=Hs.326159 /LL=9208 /UG_GENE=LRRFIP1 /UG_TITLE=leucine rich repeat (in FLII) interacting protein 1
IMPDH1	204169_at	0.0212001	0.000185679	1.4565	0.542503	1.4565	up	1.76078	0.816213	1.76078	up	1.91143	0.934652	1.91143	up	1.91285	0.935724	1.91285	up	3614	Hs.654401	gb:NM_000883.1 /DB_XREF=gi:4504686 /GEN=IMPDH1 /FEA=FLmRNA /CNT=63 /TID=Hs.850.0 /TIER=FL+Stack /STK=19 /UG=Hs.850 /LL=3614 /DEF=Homo sapiens IMP (inosine monophosphate) dehydrogenase 1 (IMPDH1), mRNA. /PROD=IMP (inosine monophosphate) dehydrogenase 1 /FL=gb:NM_000883.1 gb:J05272.1
SLC39A9	217859_s_at	0.0212001	0.000185718	-1.04743	-0.0668561	1.04743	down	1.05965	0.0835826	1.05965	up	1.01151	0.0165064	1.01151	up	1.85465	0.89115	1.85465	up	55334	Hs.432690	gb:NM_018375.1 /DB_XREF=gi:8922967 /GEN=FLJ11274 /FEA=FLmRNA /CNT=208 /TID=Hs.18104.0 /TIER=FL /STK=3 /UG=Hs.18104 /LL=55334 /DEF=Homo sapiens hypothetical protein FLJ11274 (FLJ11274), mRNA. /PROD=hypothetical protein FLJ11274 /FL=gb:NM_018375.1
PELO	218472_s_at	0.0212001	0.00018657	1.13886	0.187595	1.13886	up	-2.33933	-1.2261	2.33933	down	-2.86559	-1.51883	2.86559	down	-1.2039	-0.267719	1.2039	down	53918	Hs.644352	gb:NM_015946.1 /DB_XREF=gi:7705599 /GEN=PELO /FEA=FLmRNA /CNT=104 /TID=Hs.5798.0 /TIER=FL+Stack /STK=13 /UG=Hs.5798 /LL=53918 /DEF=Homo sapiens pelota (Drosophila) homolog (PELO), mRNA. /PROD=CGI-17 protein /FL=gb:NM_015946.1 gb:AF132951.1 gb:AF139828.1
SLC30A5	1555334_s_at	0.0212001	0.000187122	1.11615	0.158525	1.11615	up	1.30818	0.38756	1.30818	up	1.41853	0.504399	1.41853	up	2.20502	1.14079	2.20502	up	64924	Hs.631975	gb:AF439324.1 /DB_XREF=gi:19071290 /GEN=ZTL1 /TID=Hs2Affx.1.207 /CNT=1 /FEA=FLmRNA /TIER=FL /STK=1 /NOTE=sequence(s) not in UniGene /DEF=Homo sapiens zinc transporter ZTL1 (ZTL1) mRNA, complete cds. /PROD=zinc transporter ZTL1 /FL=gb:AF439324.1
TP53INP1	244721_at	0.0212001	0.000187698	-1.2674	-0.34187	1.2674	down	1.0783	0.108754	1.0783	up	1.13449	0.182047	1.13449	up	1.46942	0.555251	1.46942	up	94241	Hs.492261	gb:AW242000 /DB_XREF=gi:6575754 /DB_XREF=xn77g11.x1 /CLONE=IMAGE:2700548 /FEA=EST /CNT=4 /TID=Hs.253962.0 /TIER=ConsEnd /STK=3 /UG=Hs.253962 /UG_TITLE=ESTs, Weakly similar to dJ1181N3.1 (H.sapiens)
RTN3	224564_s_at	0.0212001	0.000187734	1.31201	0.39178	1.31201	up	3.34737	1.74303	3.34737	up	2.6742	1.41911	2.6742	up	3.71373	1.89287	3.71373	up	10313	Hs.743229	gb:BE544689 /DB_XREF=gi:9773334 /DB_XREF=601074306F1 /CLONE=IMAGE:3460369 /FEA=mRNA /CNT=479 /TID=Hs.252831.1 /TIER=Stack /STK=81 /UG=Hs.252831 /LL=10313 /UG_GENE=RTN3 /UG_TITLE=reticulon 3
STAG3L4	222801_s_at	0.0212001	0.000187885	1.0151	0.0216267	1.0151	up	-2.55217	-1.35173	2.55217	down	-1.97565	-0.982328	1.97565	down	-1.93094	-0.949301	1.93094	down	64940	Hs.632013	gb:BF056088 /DB_XREF=gi:10809984 /DB_XREF=7j86e07.x1 /CLONE=IMAGE:3393348 /FEA=FLmRNA /CNT=50 /TID=Hs.213392.0 /TIER=Stack /STK=13 /UG=Hs.213392 /LL=64940 /UG_GENE=FLJ13195 /UG_TITLE=hypothetical protein FLJ13195 similar to stromal antigen 3 /FL=gb:NM_022906.1
	241617_x_at	0.0212001	0.000188278	1.10455	0.143453	1.10455	up	-1.98505	-0.989175	1.98505	down	-2.12941	-1.09045	2.12941	down	-1.93157	-0.949776	1.93157	down		Hs.729342	gb:BE961949 /DB_XREF=gi:11764352 /DB_XREF=601655369R1 /CLONE=IMAGE:3845872 /FEA=EST /CNT=7 /TID=Hs.295011.0 /TIER=ConsEnd /STK=0 /UG=Hs.295011 /UG_TITLE=ESTs, Moderately similar to 810024C cytochrome oxidase I (H.sapiens)
	208246_x_at	0.0212001	0.000188382	-1.28853	-0.365727	1.28853	down	1.12844	0.174328	1.12844	up	-1.13561	-0.183471	1.13561	down	-2.10545	-1.07413	2.10545	down		Hs.610957	gb:NM_017618.1 /DB_XREF=gi:8923014 /GEN=FLJ20006 /FEA=FLmRNA /CNT=2 /TID=Hs.279007.0 /TIER=FL /STK=0 /UG=Hs.279007 /LL=54782 /DEF=Homo sapiens hypothetical protein FLJ20006 (FLJ20006), mRNA. /PROD=hypothetical protein FLJ20006 /FL=gb:NM_017618.1
GBGT1	231780_at	0.0212001	0.000188664	-1.05939	-0.0832365	1.05939	down	1.76715	0.821425	1.76715	up	1.76863	0.822631	1.76863	up	2.03832	1.02738	2.03832	up	26301	Hs.495419	gb:AI627912 /DB_XREF=gi:4664712 /DB_XREF=ty20f05.x1 /CLONE=IMAGE:2279649 /FEA=FLmRNA /CNT=14 /TID=Hs.130783.0 /TIER=ConsEnd /STK=3 /UG=Hs.130783 /LL=26301 /UG_GENE=FS /UG_TITLE=Forssman synthetase /FL=gb:NM_021996.1
GLUD1	200947_s_at	0.0212001	0.000188799	1.24587	0.317152	1.24587	up	1.65059	0.722981	1.65059	up	1.60196	0.679841	1.60196	up	2.46247	1.30011	2.46247	up	2746	Hs.500409	gb:NM_005271.1 /DB_XREF=gi:4885280 /GEN=GLUD1 /FEA=FLmRNA /CNT=311 /TID=Hs.77508.0 /TIER=FL+Stack /STK=84 /UG=Hs.77508 /LL=2746 /DEF=Homo sapiens glutamate dehydrogenase 1 (GLUD1), mRNA. /PROD=glutamate dehydrogenase 1 /FL=gb:NM_005271.1 gb:M20867.1 gb:J03248.1 gb:M37154.1
CDK3///TEN1-CDK3	207188_at	0.0212001	0.000188969	-1.03837	-0.0543197	1.03837	down	1.26205	0.335764	1.26205	up	1.40903	0.494705	1.40903	up	1.4318	0.517831	1.4318	up	1018///100529145	Hs.706766	gb:NM_001258.1 /DB_XREF=gi:4557438 /GEN=CDK3 /FEA=FLmRNA /CNT=5 /TID=Hs.100009.0 /TIER=FL /STK=0 /UG=Hs.100009 /LL=1018 /DEF=Homo sapiens cyclin-dependent kinase 3 (CDK3), mRNA. /PROD=cyclin-dependent kinase 3 /FL=gb:NM_001258.1
HSP90AA1	211969_at	0.0212001	0.000189088	1.04939	0.069553	1.04939	up	-1.3794	-0.464041	1.3794	down	-1.72244	-0.784451	1.72244	down	-1.54325	-0.625974	1.54325	down	3320	Hs.525600	gb:BG420237 /DB_XREF=gi:13326743 /DB_XREF=602448244F1 /CLONE=IMAGE:4586914 /FEA=FLmRNA /CNT=460 /TID=Hs.289088.4 /TIER=Stack /STK=41 /UG=Hs.289088 /LL=3320 /UG_GENE=HSPCA /UG_TITLE=heat shock 90kD protein 1, alpha /FL=gb:NM_005348.1
COL4A3BP	219625_s_at	0.0212001	0.000189542	1.21811	0.284639	1.21811	up	1.87332	0.905597	1.87332	up	-1.10803	-0.147995	1.10803	down	-1.08642	-0.119578	1.08642	down	10087	Hs.270437	gb:NM_005713.1 /DB_XREF=gi:5031716 /GEN=COL4A3BP /FEA=FLmRNA /CNT=26 /TID=Hs.21276.0 /TIER=FL /STK=0 /UG=Hs.21276 /LL=10087 /DEF=Homo sapiens collagen, type IV, alpha 3 (Goodpasture antigen) binding protein (COL4A3BP), mRNA. /PROD=collagen, type IV, alpha 3 (Goodpasture antigen)binding protein /FL=gb:NM_005713.1 gb:AF136450.1
ARHGAP36	238047_at	0.0212001	0.000189565	-1.00744	-0.0106906	1.00744	down	1.21358	0.27927	1.21358	up	1.09705	0.133624	1.09705	up	1.07587	0.105507	1.07587	up	158763	Hs.22905	gb:AA405456 /DB_XREF=gi:2062985 /DB_XREF=zw36b01.s1 /CLONE=IMAGE:772105 /FEA=EST /CNT=11 /TID=Hs.22905.0 /TIER=ConsEnd /STK=0 /UG=Hs.22905 /UG_TITLE=ESTs, Weakly similar to rho-type GTPase-activating protein rhoGAPX-1 isoform 2 (H.sapiens)
GM2A	215891_s_at	0.0212001	0.000189821	1.07912	0.109855	1.07912	up	2.41227	1.27039	2.41227	up	1.40408	0.489628	1.40408	up	4.59304	2.19945	4.59304	up	2760	Hs.483873	gb:X61094.1 /DB_XREF=gi:31854 /FEA=mRNA /CNT=2 /TID=Hs.289082.1 /TIER=ConsEnd /STK=0 /UG=Hs.289082 /LL=2760 /UG_GENE=GM2A /DEF=H.sapiens RNA for GM2-activator protein (clone pGM2A). /PROD=GM2-activator protein
	243715_at	0.0212001	0.000190672	-1.42261	-0.508542	1.42261	down	1.0692	0.0965269	1.0692	up	-1.16012	-0.214271	1.16012	down	-1.24722	-0.318716	1.24722	down		Hs.663768	gb:AW975013 /DB_XREF=gi:8166216 /DB_XREF=EST387118 /FEA=EST /CNT=6 /TID=Hs.292437.0 /TIER=ConsEnd /STK=0 /UG=Hs.292437 /UG_TITLE=ESTs
CMTM3	224733_at	0.0212001	0.000190764	1.12186	0.165896	1.12186	up	1.0635	0.0888264	1.0635	up	1.42313	0.509066	1.42313	up	1.16006	0.214202	1.16006	up	123920	Hs.298198	gb:AL574900 /DB_XREF=gi:12935545 /DB_XREF=AL574900 /CLONE=CS0DI041YH21 (3 prime) /FEA=EST /CNT=203 /TID=Hs.7773.4 /TIER=Stack /STK=92 /UG=Hs.7773 /LL=55482 /UG_GENE=PRO2121 /UG_TITLE=hypothetical protein PRO2121
TMPO	209753_s_at	0.0212001	0.000190772	1.024	0.034209	1.024	up	-1.14109	-0.190409	1.14109	down	-1.34722	-0.429987	1.34722	down	2.04253	1.03035	2.04253	up	7112	Hs.11355	gb:BG391171 /DB_XREF=gi:13284619 /DB_XREF=602417192F1 /CLONE=IMAGE:4536623 /FEA=FLmRNA /CNT=69 /TID=Hs.11355.2 /TIER=Stack /STK=9 /UG=Hs.11355 /LL=7112 /UG_GENE=TMPO /UG_TITLE=thymopoietin /FL=gb:U09087.1 gb:AF113682.1
LOC102724434	1562664_at	0.0212506	0.000191615	-1.00928	-0.0133195	1.00928	down	1.22741	0.295621	1.22741	up	-1.01816	-0.0259697	1.01816	down	-1.08906	-0.123079	1.08906	down	102724434		gb:AK097428.1 /DB_XREF=gi:21757181 /TID=Hs2.377146.1 /CNT=2 /FEA=mRNA /TIER=ConsEnd /STK=0 /LL=286009 /UG_GENE=LOC286009 /UG=Hs.377146 /UG_TITLE=hypothetical protein LOC286009 /DEF=Homo sapiens cDNA FLJ40109 fis, clone TESTI2007685.
ATP2B4	205410_s_at	0.0213311	0.000192731	-1.09949	-0.136832	1.09949	down	1.14822	0.199397	1.14822	up	1.10689	0.146513	1.10689	up	1.56721	0.648201	1.56721	up	493	Hs.343522	gb:NM_001684.1 /DB_XREF=gi:4502288 /GEN=ATP2B4 /FEA=FLmRNA /CNT=29 /TID=Hs.305923.0 /TIER=FL /STK=0 /UG=Hs.305923 /LL=493 /DEF=Homo sapiens ATPase, Ca++ transporting, plasma membrane 4 (ATP2B4), mRNA. /PROD=ATPase, Ca++ transporting, plasma membrane 4 /FL=gb:M25874.1 gb:NM_001684.1
SELK	223070_at	0.0213922	0.000193675	-1.01616	-0.0231262	1.01616	down	-2.4522	-1.29408	2.4522	down	-2.14642	-1.10193	2.14642	down	-1.85449	-0.89102	1.85449	down	58515	Hs.58471	gb:AF085359.1 /DB_XREF=gi:5114052 /FEA=FLmRNA /CNT=190 /TID=Hs.180145.0 /TIER=FL+Stack /STK=74 /UG=Hs.180145 /LL=58515 /UG_GENE=HSPC030 /DEF=Homo sapiens HSPC030 mRNA, complete cds. /PROD=HSPC030 /FL=gb:AF085359.1
LIPF	206334_at	0.0216333	0.000196289	-1.07804	-0.10841	1.07804	down	1.16085	0.215178	1.16085	up	1.19709	0.259538	1.19709	up	1.02859	0.0406662	1.02859	up	8513	Hs.523130	gb:NM_004190.1 /DB_XREF=gi:4758675 /GEN=LIPF /FEA=FLmRNA /CNT=96 /TID=Hs.159177.0 /TIER=FL+Stack /STK=12 /UG=Hs.159177 /LL=8513 /DEF=Homo sapiens lipase, gastric (LIPF), mRNA. /PROD=lipase, gastric /FL=gb:NM_004190.1
VPS29	1554388_at	0.0216333	0.000196922	-1.22592	-0.293867	1.22592	down	1.35153	0.43459	1.35153	up	1.07681	0.106769	1.07681	up	1.08991	0.124211	1.08991	up	51699	Hs.600114	gb:BC032462.1 /DB_XREF=gi:21595557 /TID=Hs2.69192.3 /CNT=2 /FEA=FLmRNA /TIER=FL /STK=2 /LL=51699 /UG_GENE=VPS29 /UG=Hs.69192 /DEF=Homo sapiens, hypothetical gene supported by BC017964, clone MGC:40428 IMAGE:5197243, mRNA, complete cds. /PROD=hypothetical gene supported by BC017964 /FL=gb:BC032462.1
SNRPC	201342_at	0.0216333	0.000197044	-1.18389	-0.243534	1.18389	down	-1.37694	-0.461461	1.37694	down	-1.30164	-0.380325	1.30164	down	-1.30145	-0.380123	1.30145	down	6631	Hs.1063	gb:NM_003093.1 /DB_XREF=gi:4507126 /GEN=SNRPC /FEA=FLmRNA /CNT=276 /TID=Hs.1063.0 /TIER=FL+Stack /STK=125 /UG=Hs.1063 /LL=6631 /DEF=Homo sapiens small nuclear ribonucleoprotein polypeptide C (SNRPC), mRNA. /PROD=small nuclear ribonucleoprotein polypeptide C /FL=gb:NM_003093.1
KIAA0907	230028_at	0.0216487	0.000198233	-1.17131	-0.228117	1.17131	down	1.70024	0.765737	1.70024	up	-2.37746	-1.24942	2.37746	down	-1.28158	-0.357926	1.28158	down	22889		gb:BF508843 /DB_XREF=gi:11592141 /DB_XREF=UI-H-BI4-aor-e-01-0-UI.s1 /CLONE=IMAGE:3085897 /FEA=EST /CNT=23 /TID=Hs.119769.0 /TIER=Stack /STK=18 /UG=Hs.119769 /UG_TITLE=ESTs
LEPR	211354_s_at	0.0216487	0.000198293	-1.17312	-0.230352	1.17312	down	1.19512	0.257161	1.19512	up	-1.05556	-0.0780091	1.05556	down	1.61962	0.695655	1.61962	up	3953	Hs.723178	gb:U52913.1 /DB_XREF=gi:1279902 /FEA=FLmRNA /CNT=1 /TID=Hs.226627.2 /TIER=FL /STK=0 /UG=Hs.226627 /LL=3953 /UG_GENE=LEPR /DEF=Human B219OB receptor isoform HuB219.2 precursor mRNA, complete cds. /PROD=B219OB receptor isoform HuB219.2 precursor /FL=gb:U52913.1
TIAM1	206409_at	0.0216487	0.000198769	-1.20671	-0.271084	1.20671	down	-1.03828	-0.0541949	1.03828	down	1.21869	0.285336	1.21869	up	1.51932	0.603424	1.51932	up	7074	Hs.517228	gb:NM_003253.1 /DB_XREF=gi:4507500 /GEN=TIAM1 /FEA=FLmRNA /CNT=14 /TID=Hs.115176.0 /TIER=FL /STK=0 /UG=Hs.115176 /LL=7074 /DEF=Homo sapiens T-cell lymphoma invasion and metastasis 1 (TIAM1), mRNA. /PROD=T-cell lymphoma invasion and metastasis 1 /FL=gb:NM_003253.1 gb:U16296.1
RBM39	207941_s_at	0.0216487	0.00019939	1.10246	0.140731	1.10246	up	-1.737	-0.796599	1.737	down	-1.23574	-0.305379	1.23574	down	-1.26009	-0.333528	1.26009	down	9584	Hs.282901	gb:NM_004902.1 /DB_XREF=gi:4757925 /GEN=CC1.3 /FEA=FLmRNA /CNT=4 /TID=Hs.145696.0 /TIER=FL /STK=0 /UG=Hs.145696 /LL=9584 /DEF=Homo sapiens splicing factor (CC1.3) (CC1.3), mRNA. /PROD=splicing factor (CC1.3) /FL=gb:L10910.1 gb:NM_004902.1
CCNY	224651_at	0.0216487	0.000199654	1.18633	0.24651	1.18633	up	1.86544	0.899519	1.86544	up	1.2371	0.306959	1.2371	up	1.33752	0.419563	1.33752	up	219771	Hs.14745	gb:AI921096 /DB_XREF=gi:5657060 /DB_XREF=wo19e03.x1 /CLONE=IMAGE:2455804 /FEA=EST /CNT=321 /TID=Hs.6820.0 /TIER=Stack /STK=58 /UG=Hs.6820 /UG_TITLE=ESTs, Weakly similar to YOJ1_CAEEL HYPOTHETICAL 63.5 KD PROTEIN ZK353.1 IN CHROMOSOME III (C.elegans)
SEPT3///WBP2NL	223362_s_at	0.0216487	0.000199705	-1.12498	-0.169905	1.12498	down	1.36264	0.446407	1.36264	up	1.28728	0.364321	1.28728	up	1.16595	0.221503	1.16595	up	55964///164684	Hs.120483	gb:AF285109.1 /DB_XREF=gi:9837297 /FEA=FLmRNA /CNT=91 /TID=Hs.8073.0 /TIER=FL /STK=0 /UG=Hs.8073 /LL=55964 /UG_GENE=SEP3 /DEF=Homo sapiens septin 3 isoform B mRNA, complete cds. /PROD=septin 3 isoform B /FL=gb:NM_019106.1 gb:AF285109.1
STEAP4	225987_at	0.0216487	0.000199956	2.31069	1.20832	2.31069	up	11.3195	3.50074	11.3195	up	6.48881	2.69795	6.48881	up	4.23038	2.08079	4.23038	up	79689	Hs.521008	gb:AA650281 /DB_XREF=gi:2577609 /DB_XREF=ns88g09.s1 /CLONE=IMAGE:1190752 /FEA=EST /CNT=89 /TID=Hs.11177.0 /TIER=Stack /STK=38 /UG=Hs.11177 /UG_TITLE=ESTs
RNF146	221430_s_at	0.0217993	0.000201926	1.10295	0.141361	1.10295	up	-1.10388	-0.142582	1.10388	down	1.66412	0.734758	1.66412	up	1.94229	0.95776	1.94229	up	81847	Hs.267120	gb:NM_030963.1 /DB_XREF=gi:13624336 /GEN=DKFZP434O1427 /FEA=FLmRNA /CNT=1 /TID=HsAffx.900164.1093 /TIER=FL /STK=0 /DEF=Homo sapiens hypothetical protein DKFZp434O1427 (DKFZP434O1427), mRNA. /PROD=hypothetical protein DKFZp434O1427 /FL=gb:NM_030963.1
PRRC2C	214055_x_at	0.0217993	0.000202527	-1.01281	-0.0183668	1.01281	down	-1.34426	-0.426816	1.34426	down	-1.98571	-0.989656	1.98571	down	-2.07957	-1.05629	2.07957	down	23215	Hs.494614	gb:AW238632 /DB_XREF=gi:6571021 /DB_XREF=xp29d03.x1 /CLONE=IMAGE:2741765 /FEA=EST /CNT=33 /TID=Hs.69559.0 /TIER=ConsEnd /STK=0 /UG=Hs.69559 /LL=23215 /UG_GENE=KIAA1096 /UG_TITLE=KIAA1096 protein
SLC48A1	218417_s_at	0.0217993	0.000202835	1.09627	0.132607	1.09627	up	1.60305	0.680822	1.60305	up	1.55362	0.635635	1.55362	up	2.04093	1.02923	2.04093	up	55652	Hs.438867	gb:NM_017842.1 /DB_XREF=gi:8923451 /GEN=FLJ20489 /FEA=FLmRNA /CNT=119 /TID=Hs.267368.0 /TIER=FL+Stack /STK=31 /UG=Hs.267368 /LL=55652 /DEF=Homo sapiens hypothetical protein FLJ20489 (FLJ20489), mRNA. /PROD=hypothetical protein FLJ20489 /FL=gb:NM_017842.1
DDX56	238525_at	0.0217993	0.000202942	-1.125	-0.169926	1.125	down	1.35981	0.443405	1.35981	up	-1.07509	-0.104451	1.07509	down	-1.19355	-0.25526	1.19355	down	54606	Hs.654762	gb:BF987157 /DB_XREF=gi:12393479 /DB_XREF=MR2-GN0127-051000-001-e03 /FEA=EST /CNT=11 /TID=Hs.303345.0 /TIER=ConsEnd /STK=0 /UG=Hs.303345 /UG_TITLE=ESTs
	240451_at	0.0218342	0.000203666	-1.36368	-0.447502	1.36368	down	1.4004	0.485842	1.4004	up	-1.88164	-0.911994	1.88164	down	-1.87831	-0.909433	1.87831	down			gb:AA004844 /DB_XREF=gi:1447681 /DB_XREF=zh90b02.s1 /CLONE=IMAGE:428523 /FEA=EST /CNT=5 /TID=Hs.269387.0 /TIER=ConsEnd /STK=4 /UG=Hs.269387 /UG_TITLE=ESTs
TAOK1	216310_at	0.0218413	0.000204297	-1.2739	-0.349256	1.2739	down	1.25065	0.32268	1.25065	up	-1.09777	-0.134569	1.09777	down	-1.44318	-0.52925	1.44318	down	57551		gb:AK024376.1 /DB_XREF=gi:10436747 /FEA=mRNA /CNT=2 /TID=Hs.15119.1 /TIER=ConsEnd /STK=0 /UG=Hs.15119 /LL=57551 /UG_GENE=KIAA1361 /UG_TITLE=KIAA1361 protein /DEF=Homo sapiens cDNA FLJ14314 fis, clone PLACE3000350, weakly similar to SERINETHREONINE-PROTEIN KINASE SULU (EC 2.7.1.-).
NDUFB2	218201_at	0.0218413	0.000204531	-1.01651	-0.02363	1.01651	down	-1.76197	-0.81719	1.76197	down	-1.33836	-0.420465	1.33836	down	-1.21019	-0.275231	1.21019	down	4708	Hs.655788	gb:NM_004546.1 /DB_XREF=gi:4758777 /GEN=NDUFB2 /FEA=FLmRNA /CNT=133 /TID=Hs.198272.0 /TIER=FL+Stack /STK=61 /UG=Hs.198272 /LL=4708 /DEF=Homo sapiens NADH dehydrogenase (ubiquinone) 1 beta subcomplex, 2 (8kD, AGGG) (NDUFB2), mRNA. /PROD=NADH dehydrogenase (ubiquinone) 1 betasubcomplex, 2 (8kD, AGGG) /FL=gb:AF050639.1 gb:BC001168.1 gb:AF067166.1 gb:NM_004546.1
USP18	219211_at	0.0218677	0.000205309	1.14835	0.199568	1.14835	up	-6.59595	-2.72158	6.59595	down	-7.32201	-2.87224	7.32201	down	-5.90136	-2.56105	5.90136	down	11274	Hs.38260	gb:NM_017414.1 /DB_XREF=gi:8394518 /GEN=USP18 /FEA=FLmRNA /CNT=50 /TID=Hs.38260.0 /TIER=FL+Stack /STK=30 /UG=Hs.38260 /LL=11274 /DEF=Homo sapiens ubiquitin specific protease 18 (USP18), mRNA. /PROD=ubiquitin specific protease 18 /FL=gb:AF176642.2 gb:NM_017414.1 gb:AL136690.1
HIPK1	1552516_a_at	0.0218677	0.000205831	-1.20348	-0.267211	1.20348	down	1.77878	0.830891	1.77878	up	-2.38426	-1.25354	2.38426	down	1.06439	0.0900213	1.06439	up	204851	Hs.532363	gb:NM_152696.1 /DB_XREF=gi:23397583 /TID=Hs2.12259.1 /CNT=13 /FEA=FLmRNA /TIER=FL /STK=3 /LL=204851 /UG_GENE=Nbak2 /UG=Hs.12259 /UG_TITLE=homeodomain interacting protein kinase 1-like protein /DEF=Homo sapiens homeodomain interacting protein kinase 1-like protein (Nbak2), mRNA. /FL=gb:BC033012.1 gb:NM_152696.1
MRGPRX2	1553889_at	0.0218677	0.000206154	-1.13671	-0.184859	1.13671	down	1.11669	0.159226	1.11669	up	1.18649	0.246695	1.18649	up	1.23168	0.300623	1.23168	up	117194	Hs.350566	gb:NM_054030.1 /DB_XREF=gi:16876450 /GEN=MRGX2 /TID=Hs2.350566.1 /CNT=3 /FEA=FLmRNA /TIER=FL /STK=0 /LL=117194 /UG=Hs.350566 /DEF=Homo sapiens G protein-coupled receptor MRGX2 (MRGX2), mRNA. /PROD=G protein-coupled receptor MRGX2 /FL=gb:NM_054030.1
NONO	210470_x_at	0.0218677	0.000206378	-1.11391	-0.155634	1.11391	down	1.06984	0.0973894	1.06984	up	1.26098	0.334551	1.26098	up	1.82205	0.865564	1.82205	up	4841	Hs.533282	gb:BC003129.1 /DB_XREF=gi:13111916 /FEA=FLmRNA /CNT=5 /TID=Hs.172207.1 /TIER=FL /STK=0 /UG=Hs.172207 /LL=4841 /UG_GENE=NONO /DEF=Homo sapiens, non-POU-domain-containing, octamer-binding, clone MGC:3380, mRNA, complete cds. /PROD=non-POU-domain-containing, octamer-binding /FL=gb:BC003129.1
RBM14	1555639_a_at	0.0219796	0.000208118	-1.1651	-0.220449	1.1651	down	-1.1282	-0.174028	1.1282	down	-1.07403	-0.103036	1.07403	down	2.46105	1.29927	2.46105	up	10432	Hs.533712	gb:AF315633.1 /DB_XREF=gi:15022508 /TID=Hs2.11170.3 /CNT=1 /FEA=FLmRNA /TIER=FL /STK=1 /LL=10432 /UG_GENE=RBM14 /UG=Hs.11170 /DEF=Homo sapiens coactivator modulator mRNA, complete cds, alternatively spliced. /PROD=coactivator modulator /FL=gb:AF315633.1
	208077_at	0.0219796	0.000208238	-2.45891	-1.29802	2.45891	down	-2.60105	-1.37909	2.60105	down	-3.2362	-1.6943	3.2362	down	-3.16834	-1.66373	3.16834	down		Hs.676462	gb:NM_014126.1 /DB_XREF=gi:7662547 /GEN=PRO0365 /FEA=FLmRNA /CNT=2 /TID=Hs.249613.0 /TIER=FL /STK=0 /UG=Hs.249613 /LL=29044 /DEF=Homo sapiens PRO0365 protein (PRO0365), mRNA. /PROD=PRO0365 protein /FL=gb:NM_014126.1 gb:AF090921.1
DNAH1	1562278_at	0.0219809	0.000208823	-1.10336	-0.1419	1.10336	down	1.32268	0.403469	1.32268	up	-1.06342	-0.0887056	1.06342	down	-1.03994	-0.0564996	1.03994	down	25981	Hs.655469	gb:AL832045.1 /DB_XREF=gi:21732586 /TID=Hs2.377042.1 /CNT=2 /FEA=mRNA /TIER=ConsEnd /STK=0 /UG=Hs.377042 /UG_TITLE=Homo sapiens mRNA; cDNA DKFZp313H0310 (from clone DKFZp313H0310) /DEF=Homo sapiens mRNA; cDNA DKFZp313H0310 (from clone DKFZp313H0310).
FAM63A	221856_s_at	0.0219809	0.000209055	1.01552	0.0222165	1.01552	up	2.50765	1.32634	2.50765	up	1.4446	0.530673	1.4446	up	2.02489	1.01784	2.02489	up	55793	Hs.743952	gb:AL561943 /DB_XREF=gi:12909874 /DB_XREF=AL561943 /CLONE=CS0DB002YO04 (3 prime) /FEA=mRNA /CNT=42 /TID=Hs.3346.1 /TIER=Stack /STK=9 /UG=Hs.3346 /LL=55793 /UG_GENE=FLJ11280 /UG_TITLE=hypothetical protein FLJ11280
CD99L2	223041_at	0.0220498	0.000210251	1.19091	0.252059	1.19091	up	1.57433	0.654736	1.57433	up	1.60822	0.685463	1.60822	up	1.7976	0.846075	1.7976	up	83692	Hs.522805	gb:AL136580.1 /DB_XREF=gi:13276662 /GEN=DKFZp761H2024 /FEA=FLmRNA /CNT=185 /TID=Hs.169388.0 /TIER=FL /STK=0 /UG=Hs.169388 /DEF=Homo sapiens mRNA; cDNA DKFZp761H2024 (from clone DKFZp761H2024); complete cds. /PROD=hypothetical protein /FL=gb:AL136580.1
NEAT1	225239_at	0.0220498	0.000210516	-1.16286	-0.217676	1.16286	down	5.15631	2.36634	5.15631	up	3.36804	1.75191	3.36804	up	1.66858	0.738618	1.66858	up	283131	Hs.523789	gb:AI355441 /DB_XREF=gi:4095594 /DB_XREF=qt77h05.x1 /CLONE=IMAGE:1961337 /FEA=EST /CNT=82 /TID=Hs.285814.2 /TIER=Stack /STK=10 /UG=Hs.285814 /LL=81848 /UG_GENE=SPRY4 /UG_TITLE=sprouty (Drosophila) homolog 4
DBT	205370_x_at	0.022051	0.00021122	-1.38973	-0.474803	1.38973	down	1.07679	0.106731	1.07679	up	-1.26021	-0.333662	1.26021	down	-2.12926	-1.09035	2.12926	down	1629	Hs.709187	gb:NM_001918.1 /DB_XREF=gi:4503264 /GEN=DBT /FEA=FLmRNA /CNT=33 /TID=Hs.139410.0 /TIER=FL /STK=0 /UG=Hs.139410 /LL=1629 /DEF=Homo sapiens dihydrolipoamide branched chain transacylase (E2 component of branched chain keto acid dehydrogenase complex; maple syrup urine disease) (DBT), mRNA. /PROD=dihydrolipoamide branched chain transacylase (E2component of branched chain keto acid dehydrogenasecomple…
ACTG1	212988_x_at	0.022051	0.000211334	1.00376	0.00540876	1.00376	up	1.40173	0.487206	1.40173	up	1.32769	0.408923	1.32769	up	1.37571	0.460179	1.37571	up	71	Hs.514581	gb:AL515810 /DB_XREF=gi:12779303 /DB_XREF=AL515810 /CLONE=CS0DA001YI24 (3 prime) /FEA=EST /CNT=72 /TID=Hs.14376.3 /TIER=Stack /STK=51 /UG=Hs.14376 /LL=71 /UG_GENE=ACTG1 /UG_TITLE=actin, gamma 1
DGUOK	209549_s_at	0.0221032	0.000212444	1.07502	0.104365	1.07502	up	-1.96022	-0.971013	1.96022	down	-1.55906	-0.640676	1.55906	down	-1.55288	-0.634945	1.55288	down	1716	Hs.469022	gb:BC001121.1 /DB_XREF=gi:12654572 /FEA=FLmRNA /CNT=71 /TID=Hs.326494.0 /TIER=FL+Stack /STK=37 /UG=Hs.326494 /DEF=Homo sapiens, Similar to deoxyguanosine kinase, clone MGC:2111, mRNA, complete cds. /PROD=Similar to deoxyguanosine kinase /FL=gb:BC001121.1
JAK1	239695_at	0.0221032	0.000212643	-1.46656	-0.552433	1.46656	down	1.03019	0.0429105	1.03019	up	-3.32247	-1.73226	3.32247	down	-2.66938	-1.41651	2.66938	down	3716	Hs.207538	gb:AI280194 /DB_XREF=gi:3918427 /DB_XREF=qk55c12.x1 /CLONE=IMAGE:1872886 /FEA=EST /CNT=7 /TID=Hs.144848.0 /TIER=ConsEnd /STK=4 /UG=Hs.144848 /UG_TITLE=ESTs
SRSF9	200044_at	0.0221457	0.000213732	1.07309	0.101766	1.07309	up	1.2377	0.307656	1.2377	up	1.31808	0.398433	1.31808	up	1.58512	0.664591	1.58512	up	8683	Hs.744094	gb:NM_003769.1 /DB_XREF=gi:4506902 /GEN=SFRS9 /FEA=FLmRNA /CNT=200 /TID=Hs.77608.0 /TIER=FL /STK=6 /UG=Hs.77608 /LL=8683 /DEF=Homo sapiens splicing factor, arginineserine-rich 9 (SFRS9), mRNA. /PROD=splicing factor, arginineserine-rich 9 /FL=gb:U30825.1 gb:NM_003769.1
TK2	204227_s_at	0.0221457	0.000214315	1.04894	0.0689301	1.04894	up	1.60954	0.686648	1.60954	up	2.03883	1.02774	2.03883	up	2.01715	1.01232	2.01715	up	7084	Hs.512619	gb:NM_004614.1 /DB_XREF=gi:10281329 /GEN=TK2 /FEA=FLmRNA /CNT=98 /TID=Hs.274701.0 /TIER=FL /STK=0 /UG=Hs.274701 /LL=7084 /DEF=Homo sapiens thymidine kinase 2, mitochondrial (TK2), mRNA. /PROD=thymidine kinase 2, mitochondrial /FL=gb:NM_004614.1 gb:U77088.1
NDRG3	224368_s_at	0.0221457	0.000214372	-1.00178	-0.00255871	1.00178	down	1.26209	0.335818	1.26209	up	1.54423	0.626887	1.54423	up	2.33049	1.22063	2.33049	up	57446	Hs.437338	gb:AF251054.1 /DB_XREF=gi:13625169 /FEA=FLmRNA /CNT=1 /TID=HsAffx.900524.834 /TIER=FL /STK=0 /DEF=Homo sapiens NDR3 mRNA, complete cds. /PROD=NDR3 /FL=gb:AF251054.1
ATP6V0D1	212041_at	0.0221457	0.000214672	1.21169	0.277022	1.21169	up	2.7944	1.48254	2.7944	up	2.35569	1.23615	2.35569	up	2.94445	1.558	2.94445	up	9114	Hs.106876	gb:AL566172 /DB_XREF=gi:12918279 /DB_XREF=AL566172 /CLONE=CS0DF022YE19 (3 prime) /FEA=mRNA /CNT=250 /TID=Hs.106876.0 /TIER=Stack /STK=49 /UG=Hs.106876 /LL=9114 /UG_GENE=ATP6D /UG_TITLE=ATPase, H+ transporting, lysosomal (vacuolar proton pump), member D
BRD4	226054_at	0.0221883	0.000215683	1.24353	0.31444	1.24353	up	1.11491	0.156924	1.11491	up	1.11702	0.15966	1.11702	up	-1.49215	-0.57739	1.49215	down	23476		gb:AA702437 /DB_XREF=gi:2705550 /DB_XREF=zi89b01.s1 /CLONE=IMAGE:447913 /FEA=EST /CNT=58 /TID=Hs.296287.0 /TIER=Stack /STK=17 /UG=Hs.296287 /UG_TITLE=ESTs, Weakly similar to T00377 KIAA0642 protein (H.sapiens)
DYNLRB1	217918_at	0.0221883	0.000215897	1.0125	0.017929	1.0125	up	-1.39255	-0.477726	1.39255	down	-1.54317	-0.625898	1.54317	down	-1.21602	-0.282167	1.21602	down	83658	Hs.593920	gb:NM_014183.1 /DB_XREF=gi:7661821 /GEN=HSPC162 /FEA=FLmRNA /CNT=191 /TID=Hs.100002.0 /TIER=FL+Stack /STK=127 /UG=Hs.100002 /LL=29096 /DEF=Homo sapiens HSPC162 protein (HSPC162), mRNA. /PROD=HSPC162 protein /FL=gb:AF165516.1 gb:BC002481.1 gb:NM_014183.1 gb:AF161511.1 gb:AY026513.1
TNPO2	210585_s_at	0.0222	0.000216571	-1.15697	-0.210345	1.15697	down	-1.0598	-0.0837863	1.0598	down	1.2069	0.271308	1.2069	up	1.36259	0.44635	1.36259	up	30000	Hs.416049	gb:AF007748.1 /DB_XREF=gi:2440003 /FEA=FLmRNA /CNT=6 /TID=Hs.278378.0 /TIER=FL /STK=0 /UG=Hs.278378 /LL=30000 /UG_GENE=TRN2 /DEF=Homo sapiens karyopherin beta2b homolog mRNA, complete cds. /PROD=karyopherin beta2b homolog /FL=gb:NM_013433.1 gb:AF007748.1
TXNIP	201008_s_at	0.0222	0.000216823	-1.34886	-0.431746	1.34886	down	-1.17393	-0.231343	1.17393	down	-2.69613	-1.43089	2.69613	down	-1.43267	-0.518707	1.43267	down	10628	Hs.709057	gb:AA812232 /DB_XREF=gi:2881843 /DB_XREF=ob84h09.s1 /CLONE=IMAGE:1338113 /FEA=FLmRNA /CNT=488 /TID=Hs.179526.0 /TIER=Stack /STK=15 /UG=Hs.179526 /LL=10628 /UG_GENE=VDUP1 /UG_TITLE=upregulated by 1,25-dihydroxyvitamin D-3 /FL=gb:NM_006472.1 gb:S73591.1
SNRPD1	202690_s_at	0.022264	0.000218124	1.19948	0.262404	1.19948	up	-1.95104	-0.96424	1.95104	down	-1.69167	-0.758448	1.69167	down	-1.49049	-0.57579	1.49049	down	6632	Hs.464734	gb:BC001721.1 /DB_XREF=gi:12804598 /FEA=FLmRNA /CNT=121 /TID=Hs.86948.0 /TIER=FL+Stack /STK=10 /UG=Hs.86948 /LL=6632 /UG_GENE=SNRPD1 /DEF=Homo sapiens, small nuclear ribonucleoprotein D1 polypeptide (16kD), clone MGC:2222, mRNA, complete cds. /PROD=small nuclear ribonucleoprotein D1 polypeptide(16kD) /FL=gb:J03798.1 gb:NM_006938.1 gb:BC001721.1
FAM120A	200774_at	0.022264	0.000218262	1.20107	0.26432	1.20107	up	-1.05952	-0.083406	1.05952	down	1.33103	0.412543	1.33103	up	1.20724	0.271707	1.20724	up	23196	Hs.372003	gb:BE963765 /DB_XREF=gi:11767182 /DB_XREF=601657412R1 /CLONE=IMAGE:3875738 /FEA=FLmRNA /CNT=391 /TID=Hs.76666.0 /TIER=Stack /STK=51 /UG=Hs.76666 /LL=23196 /UG_GENE=C9orf10 /UG_TITLE=C9orf10 protein /FL=gb:AF214737.1 gb:NM_014612.1
PKN2	212629_s_at	0.0223067	0.000219751	1.02666	0.0379624	1.02666	up	2.0316	1.02262	2.0316	up	-1.53529	-0.618511	1.53529	down	-1.2194	-0.286168	1.2194	down	5586	Hs.440833	gb:AI633689 /DB_XREF=gi:4685019 /DB_XREF=th71d03.x1 /CLONE=IMAGE:2124101 /FEA=mRNA /CNT=126 /TID=Hs.69171.2 /TIER=Stack /STK=21 /UG=Hs.69171 /LL=5586 /UG_GENE=PRKCL2 /UG_TITLE=protein kinase C-like 2
SLC11A2	237106_at	0.0223067	0.000219756	-1.19511	-0.257143	1.19511	down	1.55623	0.638058	1.55623	up	-1.18658	-0.246812	1.18658	down	-1.12945	-0.175618	1.12945	down	4891	Hs.505545	gb:AI051244 /DB_XREF=gi:3306778 /DB_XREF=oy90d06.x1 /CLONE=IMAGE:1673099 /FEA=EST /CNT=7 /TID=Hs.14041.0 /TIER=ConsEnd /STK=5 /UG=Hs.14041 /UG_TITLE=ESTs
NAIP	238446_at	0.0223067	0.000220327	1.06173	0.0864222	1.06173	up	3.29859	1.72185	3.29859	up	1.46348	0.549408	1.46348	up	1.61518	0.691694	1.61518	up	4671	Hs.654588	gb:AI970117 /DB_XREF=gi:5766943 /DB_XREF=wq89d05.x1 /CLONE=IMAGE:2479209 /FEA=EST /CNT=12 /TID=Hs.167726.0 /TIER=ConsEnd /STK=1 /UG=Hs.167726 /UG_TITLE=ESTs, Highly similar to A55478 neuronal apoptosis inhibitory protein (H.sapiens)
ANP32A	201051_at	0.0223067	0.000220617	1.06619	0.092463	1.06619	up	1.47052	0.556331	1.47052	up	1.2592	0.332503	1.2592	up	1.29374	0.371551	1.29374	up	8125	Hs.458747	gb:BE560202 /DB_XREF=gi:9803834 /DB_XREF=601347428F1 /CLONE=IMAGE:3688350 /FEA=FLmRNA /CNT=297 /TID=Hs.285013.0 /TIER=Stack /STK=11 /UG=Hs.285013 /LL=8125 /UG_GENE=PHAP1 /UG_TITLE=putative human HLA class II associated protein I /FL=gb:U73477.1 gb:U60823.1 gb:NM_006305.1 gb:AF025684.1
UGGT1	222569_at	0.0223067	0.000220721	1.24751	0.319055	1.24751	up	1.68906	0.756223	1.68906	up	1.40931	0.494985	1.40931	up	1.98823	0.991486	1.98823	up	56886	Hs.743306	gb:AU153746 /DB_XREF=gi:11015267 /DB_XREF=AU153746 /CLONE=NT2RP3003914 /FEA=FLmRNA /CNT=95 /TID=Hs.105794.0 /TIER=Stack /STK=10 /UG=Hs.105794 /LL=56886 /UG_GENE=HUGT1 /UG_TITLE=UDP-glucose:glycoprotein glucosyltransferase 1 /FL=gb:NM_020120.1 gb:AF227905.1
TMEM230	220477_s_at	0.022312	0.000221432	-1.31777	-0.398095	1.31777	down	-1.4658	-0.551689	1.4658	down	-1.29018	-0.367573	1.29018	down	1.16606	0.221643	1.16606	up	29058	Hs.472024	gb:NM_014145.1 /DB_XREF=gi:7661833 /GEN=HSPC274 /FEA=FLmRNA /CNT=7 /TID=Hs.323476.0 /TIER=FL /STK=0 /UG=Hs.323476 /LL=29058 /DEF=Homo sapiens HSPC274 protein (HSPC274), mRNA. /PROD=HSPC274 protein /FL=gb:NM_014145.1 gb:AF161392.1
TMEM150B	1570225_at	0.022312	0.00022159	-1.04163	-0.0588371	1.04163	down	1.61093	0.687894	1.61093	up	1.38202	0.466777	1.38202	up	1.28651	0.363459	1.28651	up	284417	Hs.382625	gb:BC020862.1 /DB_XREF=gi:21594572 /TID=Hs2.382625.1 /CNT=2 /FEA=mRNA /TIER=ConsEnd /STK=0 /UG=Hs.382625 /UG_TITLE=Homo sapiens, clone IMAGE:4556692, mRNA /DEF=Homo sapiens, clone IMAGE:4556692, mRNA.
ARPC4-TTLL3///TTLL3	230872_s_at	0.0223731	0.000222606	1.00579	0.0083338	1.00579	up	1.43605	0.522102	1.43605	up	1.30967	0.389198	1.30967	up	1.68748	0.754867	1.68748	up	26140///100526693	Hs.323342///Hs.726435	gb:AA534291 /DB_XREF=gi:2278544 /DB_XREF=nf73c10.s1 /CLONE=IMAGE:925554 /FEA=EST /CNT=9 /TID=Hs.289010.2 /TIER=Stack /STK=9 /UG=Hs.289010 /LL=26140 /UG_GENE=DKFZP434B103 /UG_TITLE=DKFZP434B103 protein
ZNF106	222407_s_at	0.0224829	0.000224294	1.18585	0.24592	1.18585	up	2.65574	1.40912	2.65574	up	2.02837	1.02032	2.02837	up	1.82642	0.869019	1.82642	up	64397	Hs.511143	gb:AI493587 /DB_XREF=gi:4394590 /DB_XREF=th39b07.x1 /CLONE=IMAGE:2120629 /FEA=FLmRNA /CNT=318 /TID=Hs.15220.0 /TIER=Stack /STK=9 /UG=Hs.15220 /LL=64397 /UG_GENE=ZFP106 /UG_TITLE=zinc finger protein 106 /FL=gb:AF205632.1 gb:NM_022473.1
FYB	205285_s_at	0.0224829	0.000224521	-1.49692	-0.581995	1.49692	down	-1.27641	-0.352088	1.27641	down	-3.30646	-1.72529	3.30646	down	-1.49086	-0.576145	1.49086	down	2533	Hs.370503	gb:AI633888 /DB_XREF=gi:4685218 /DB_XREF=tt04g01.x1 /CLONE=IMAGE:2239824 /FEA=FLmRNA /CNT=60 /TID=Hs.58435.0 /TIER=Stack /STK=13 /UG=Hs.58435 /LL=2533 /UG_GENE=FYB /UG_TITLE=FYN-binding protein (FYB-120130) /FL=gb:NM_001465.1 gb:AF001862.1 gb:U93049.1
	221155_x_at	0.0226068	0.000226171	-1.23356	-0.302831	1.23356	down	-1.02008	-0.028686	1.02008	down	-1.17076	-0.227445	1.17076	down	-1.52165	-0.605633	1.52165	down			gb:NM_018603.1 /DB_XREF=gi:8924053 /GEN=PRO1496 /FEA=FLmRNA /CNT=2 /TID=Hs.283617.0 /TIER=FL /STK=0 /UG=Hs.283617 /LL=55467 /DEF=Homo sapiens hypothetical protein PRO1496 (PRO1496), mRNA. /PROD=hypothetical protein PRO1496 /FL=gb:AF116665.1 gb:NM_018603.1
SMAD3	205396_at	0.0226515	0.000227324	-1.10905	-0.149319	1.10905	down	1.06054	0.0847924	1.06054	up	1.1025	0.140773	1.1025	up	1.5165	0.600742	1.5165	up	4088	Hs.727986	gb:BF971416 /DB_XREF=gi:12338631 /DB_XREF=602272936F1 /CLONE=IMAGE:4361120 /FEA=FLmRNA /CNT=32 /TID=Hs.211578.0 /TIER=ConsEnd /STK=0 /UG=Hs.211578 /LL=4088 /UG_GENE=MADH3 /UG_TITLE=MAD (mothers against decapentaplegic, Drosophila) homolog 3 /FL=gb:U68019.1 gb:U76622.1 gb:NM_005902.1
RAB12	239891_x_at	0.0226515	0.000228197	1.88927	0.917828	1.88927	up	-1.39574	-0.48103	1.39574	down	-1.23611	-0.305811	1.23611	down	-1.54089	-0.623765	1.54089	down	201475	Hs.270074	gb:AA001052 /DB_XREF=gi:1437139 /DB_XREF=ze47e01.s1 /CLONE=IMAGE:362136 /FEA=EST /CNT=4 /TID=Hs.175870.0 /TIER=ConsEnd /STK=4 /UG=Hs.175870 /UG_TITLE=ESTs
AFF4	243487_at	0.0226515	0.000228275	-1.17667	-0.234704	1.17667	down	-1.06088	-0.085265	1.06088	down	1.00522	0.00751003	1.00522	up	1.50109	0.586007	1.50109	up	27125	Hs.519313	gb:AV652437 /DB_XREF=gi:9873451 /DB_XREF=AV652437 /CLONE=GLCDAD02 /FEA=EST /CNT=6 /TID=Hs.282908.0 /TIER=ConsEnd /STK=3 /UG=Hs.282908 /UG_TITLE=ESTs
MAPK14	202530_at	0.0226515	0.000228276	1.22741	0.295612	1.22741	up	2.62921	1.39463	2.62921	up	1.70265	0.767785	1.70265	up	2.05635	1.04009	2.05635	up	1432	Hs.485233	gb:NM_001315.1 /DB_XREF=gi:4503068 /GEN=MAPK14 /FEA=FLmRNA /CNT=154 /TID=Hs.79107.0 /TIER=FL+Stack /STK=55 /UG=Hs.79107 /LL=1432 /DEF=Homo sapiens mitogen-activated protein kinase 14 (MAPK14), mRNA. /PROD=mitogen-activated protein kinase 14 /FL=gb:L35263.1 gb:NM_001315.1
SMC1A	1555677_s_at	0.0229084	0.000231284	1.0699	0.0974759	1.0699	up	-1.03736	-0.0529178	1.03736	down	1.12259	0.166836	1.12259	up	1.21569	0.281778	1.21569	up	8243	Hs.211602	gb:BC046147.1 /DB_XREF=gi:28278223 /TID=Hs2Affx.1.433 /CNT=1 /FEA=FLmRNA /TIER=FL /STK=1 /NOTE=sequence(s) not in UniGene /DEF=Homo sapiens, Similar to SMC (structural maintenance of chromosomes 1)-like 1 (S. cerevisiae), clone MGC:57662 IMAGE:6064730, mRNA, complete cds. /PROD=Similar to SMC (structural maintenance ofchromosomes 1)-like 1 (S. cerevisiae) /FL=gb:BC046147.1
CDK2	204252_at	0.0229086	0.000231705	1.39163	0.476776	1.39163	up	1.3692	0.453334	1.3692	up	1.49322	0.578427	1.49322	up	1.88126	0.9117	1.88126	up	1017	Hs.19192	gb:M68520.1 /DB_XREF=gi:180177 /FEA=FLmRNA /CNT=115 /TID=Hs.19192.0 /TIER=FL /STK=0 /UG=Hs.19192 /LL=1017 /UG_GENE=CDK2 /DEF=Human cdc2-related protein kinase mRNA, complete cds. /PROD=cdc2-related protein kinase /FL=gb:NM_001798.1 gb:M68520.1 gb:BC003065.1
WDFY2	243514_at	0.0230011	0.000233061	-1.33389	-0.415638	1.33389	down	2.74983	1.45934	2.74983	up	2.46686	1.30267	2.46686	up	1.24187	0.312512	1.24187	up	115825		gb:AI475902 /DB_XREF=gi:4328947 /DB_XREF=tc95f02.x1 /CLONE=IMAGE:2073915 /FEA=EST /CNT=5 /TID=Hs.143056.0 /TIER=ConsEnd /STK=1 /UG=Hs.143056 /UG_TITLE=ESTs
TMEM127	222887_s_at	0.023064	0.00023474	1.38471	0.469583	1.38471	up	1.92563	0.945334	1.92563	up	2.07302	1.05173	2.07302	up	2.271	1.18332	2.271	up	55654	Hs.164303	gb:AA034018 /DB_XREF=gi:1505966 /DB_XREF=zi06d09.s1 /CLONE=IMAGE:430001 /FEA=FLmRNA /CNT=36 /TID=Hs.202955.0 /TIER=Stack /STK=21 /UG=Hs.202955 /LL=55654 /UG_GENE=FLJ20507 /UG_TITLE=hypothetical protein FLJ20507 /FL=gb:NM_017849.1
RAB21	241263_at	0.023064	0.000234866	-1.18776	-0.248246	1.18776	down	1.4307	0.516724	1.4307	up	1.02314	0.0330092	1.02314	up	1.00653	0.00938453	1.00653	up	23011		gb:AI820805 /DB_XREF=gi:5439884 /DB_XREF=qg25f09.x5 /CLONE=IMAGE:1762121 /FEA=EST /CNT=4 /TID=Hs.126605.0 /TIER=ConsEnd /STK=4 /UG=Hs.126605 /UG_TITLE=ESTs
	224417_at	0.023064	0.000235131	-1.01005	-0.0144209	1.01005	down	-1.22899	-0.297474	1.22899	down	-1.26824	-0.342832	1.26824	down	-1.49591	-0.581027	1.49591	down			gb:AF364863.1 /DB_XREF=gi:13605771 /GEN=WCL1 /FEA=FLmRNA /CNT=1 /TID=HsAffx.900656.537 /TIER=FL /STK=0 /DEF=Homo sapiens metastasis-related protein (WCL1) mRNA, complete cds. /PROD=metastasis-related protein /FL=gb:AF364863.1
PCYT1A	204209_at	0.023064	0.00023563	1.36997	0.454147	1.36997	up	1.59476	0.673337	1.59476	up	1.63084	0.705615	1.63084	up	1.86652	0.900349	1.86652	up	5130	Hs.135997	gb:AI638771 /DB_XREF=gi:4691005 /DB_XREF=tt32b06.x1 /CLONE=IMAGE:2242451 /FEA=FLmRNA /CNT=68 /TID=Hs.273558.0 /TIER=Stack /STK=9 /UG=Hs.273558 /LL=5130 /UG_GENE=PCYT1A /UG_TITLE=phosphate cytidylyltransferase 1, choline, alpha isoform /FL=gb:L28957.1 gb:NM_005017.1
NDUFB4	218226_s_at	0.023064	0.000236556	1.0299	0.0425022	1.0299	up	-1.4813	-0.566861	1.4813	down	-1.37219	-0.456478	1.37219	down	-1.3266	-0.407737	1.3266	down	4710	Hs.304613	gb:NM_004547.2 /DB_XREF=gi:6041668 /GEN=NDUFB4 /FEA=FLmRNA /CNT=155 /TID=Hs.227750.0 /TIER=FL+Stack /STK=48 /UG=Hs.227750 /LL=4710 /DEF=Homo sapiens NADH dehydrogenase (ubiquinone) 1 beta subcomplex, 4 (15kD, B15) (NDUFB4), mRNA. /PROD=NADH dehydrogenase (ubiquinone) 1 betasubcomplex, 4 (15kD, B15) /FL=gb:AF044957.1 gb:NM_004547.2 gb:BC000855.1
	242829_x_at	0.023064	0.000236559	-1.44182	-0.52789	1.44182	down	-1.12543	-0.170472	1.12543	down	-1.71671	-0.779649	1.71671	down	-3.05565	-1.61148	3.05565	down			gb:AA975422 /DB_XREF=gi:3151214 /DB_XREF=on59h06.s1 /CLONE=IMAGE:1561019 /FEA=EST /CNT=3 /TID=Hs.249364.0 /TIER=ConsEnd /STK=3 /UG=Hs.249364 /UG_TITLE=ESTs, Weakly similar to ALU1_HUMAN ALU SUBFAMILY J SEQUENCE CONTAMINATION WARNING ENTRY (H.sapiens)
ADD1	214726_x_at	0.023064	0.000236651	-1.20379	-0.26758	1.20379	down	1.15342	0.205917	1.15342	up	1.23921	0.309422	1.23921	up	1.56246	0.643815	1.56246	up	118	Hs.183706	gb:AL556041 /DB_XREF=gi:12898348 /DB_XREF=AL556041 /CLONE=CS0DK010YL13 (5 prime) /FEA=DNA_1 /CNT=24 /TID=Hs.183706.2 /TIER=ConsEnd /STK=0 /UG=Hs.183706 /LL=118 /UG_GENE=ADD1 /UG_TITLE=adducin 1 (alpha)
PIP4K2B	201081_s_at	0.0231297	0.000237748	-1.22834	-0.296709	1.22834	down	-1.00528	-0.00759339	1.00528	down	-1.05245	-0.0737457	1.05245	down	1.36715	0.451167	1.36715	up	8396	Hs.260603	gb:NM_003559.1 /DB_XREF=gi:4505818 /GEN=PIP5K2B /FEA=FLmRNA /CNT=289 /TID=Hs.6335.0 /TIER=FL /STK=0 /UG=Hs.6335 /LL=8396 /DEF=Homo sapiens phosphatidylinositol-4-phosphate 5-kinase, type II, beta (PIP5K2B), mRNA. /PROD=phosphatidylinositol-4-phosphate 5-kinase, typeII, beta /FL=gb:U85245.1 gb:NM_003559.1
TTLL4	203702_s_at	0.0231769	0.000238784	1.054	0.0758781	1.054	up	1.75346	0.810202	1.75346	up	1.66312	0.733895	1.66312	up	1.81866	0.862877	1.81866	up	9654	Hs.471405	gb:AL043927 /DB_XREF=gi:5935917 /DB_XREF=DKFZp434F1028_s1 /CLONE=DKFZp434F1028 /FEA=FLmRNA /CNT=93 /TID=Hs.169910.0 /TIER=Stack /STK=31 /UG=Hs.169910 /LL=9654 /UG_GENE=KIAA0173 /UG_TITLE=KIAA0173 gene product /FL=gb:NM_014640.1 gb:D79995.1
	244200_at	0.0231769	0.000239081	-1.2154	-0.281436	1.2154	down	1.261	0.334572	1.261	up	1.01087	0.0155998	1.01087	up	-1.03368	-0.047783	1.03368	down		Hs.673472	gb:AW902013 /DB_XREF=gi:8066218 /DB_XREF=QV0-NN1022-170400-193-b02 /FEA=EST /CNT=6 /TID=Hs.255937.0 /TIER=ConsEnd /STK=0 /UG=Hs.255937 /UG_TITLE=ESTs
PKP4	201929_s_at	0.0231881	0.00023962	1.06072	0.0850441	1.06072	up	2.00355	1.00256	2.00355	up	1.68185	0.750047	1.68185	up	2.40902	1.26844	2.40902	up	8502	Hs.407580	gb:NM_003628.2 /DB_XREF=gi:6806894 /GEN=PKP4 /FEA=FLmRNA /CNT=166 /TID=Hs.152151.0 /TIER=FL /STK=0 /UG=Hs.152151 /LL=8502 /DEF=Homo sapiens plakophilin 4 (PKP4), mRNA. /PROD=plakophilin 4 /FL=gb:NM_003628.2
RAB6A	201048_x_at	0.0233296	0.00024151	-1.01135	-0.0162798	1.01135	down	1.07658	0.106453	1.07658	up	1.11557	0.157787	1.11557	up	2.02424	1.01738	2.02424	up	5870	Hs.503222	gb:NM_002869.1 /DB_XREF=gi:4506372 /GEN=RAB6 /FEA=FLmRNA /CNT=315 /TID=Hs.5636.0 /TIER=FL /STK=1 /UG=Hs.5636 /LL=5870 /DEF=Homo sapiens RAB6, member RAS oncogene family (RAB6), mRNA. /PROD=RAB6, member RAS oncogene family /FL=gb:BC003617.1 gb:AF130986.1 gb:AF119836.1 gb:AF198616.1 gb:M28212.1 gb:AF130122.1 gb:NM_002869.1
	238610_s_at	0.0235784	0.000244517	-1.39383	-0.479052	1.39383	down	-1.42313	-0.509068	1.42313	down	-2.17483	-1.12091	2.17483	down	-2.75186	-1.4604	2.75186	down		Hs.660616	gb:AI906424 /DB_XREF=gi:6496811 /DB_XREF=RC-BT108-140399-083 /FEA=EST /CNT=9 /TID=Hs.225026.0 /TIER=ConsEnd /STK=0 /UG=Hs.225026 /UG_TITLE=ESTs
CLCN5	226274_at	0.0236726	0.000245927	1.2871	0.364123	1.2871	up	1.71107	0.774897	1.71107	up	2.40415	1.26553	2.40415	up	1.78187	0.833393	1.78187	up	1184	Hs.166486	gb:AK025562.1 /DB_XREF=gi:10438114 /FEA=mRNA /CNT=94 /TID=Hs.18612.0 /TIER=Stack /STK=51 /UG=Hs.18612 /UG_TITLE=Homo sapiens cDNA: FLJ21909 fis, clone HEP03834 /DEF=Homo sapiens cDNA: FLJ21909 fis, clone HEP03834.
	234194_at	0.0236741	0.000247058	-1.0311	-0.0441909	1.0311	down	-1.00217	-0.00313262	1.00217	down	1.25901	0.332293	1.25901	up	-1.03202	-0.0454774	1.03202	down		Hs.677357	gb:AK025597.1 /DB_XREF=gi:10438164 /FEA=mRNA /CNT=1 /TID=Hs.306817.0 /TIER=ConsEnd /STK=0 /UG=Hs.306817 /UG_TITLE=Homo sapiens cDNA: FLJ21944 fis, clone HEP04662 /DEF=Homo sapiens cDNA: FLJ21944 fis, clone HEP04662.
MORN3	210679_x_at	0.0236741	0.000247721	-1.21466	-0.280547	1.21466	down	1.04486	0.0633073	1.04486	up	-1.16702	-0.222827	1.16702	down	-2.03716	-1.02656	2.03716	down	283385		gb:BC002629.1 /DB_XREF=gi:12803588 /FEA=FLmRNA /CNT=3 /TID=Hs.211563.1 /TIER=FL /STK=0 /UG=Hs.211563 /LL=605 /UG_GENE=BCL7A /DEF=Homo sapiens, clone MGC:3878, mRNA, complete cds. /PROD=Unknown (protein for MGC:3878) /FL=gb:BC002629.1
JAZF1	225798_at	0.0236741	0.0002479	1.25803	0.331165	1.25803	up	1.28148	0.357815	1.28148	up	1.76502	0.819683	1.76502	up	1.94182	0.957412	1.94182	up	221895	Hs.368944	gb:AL047908 /DB_XREF=gi:4728096 /DB_XREF=DKFZp586P2322_s1 /CLONE=DKFZp586P2322 /FEA=mRNA /CNT=75 /TID=Hs.5437.2 /TIER=Stack /STK=28 /UG=Hs.5437 /LL=8887 /UG_GENE=TAX1BP1 /UG_TITLE=Tax1 (human T-cell leukemia virus type I) binding protein 1
SMARCD3	204099_at	0.0236741	0.000248094	1.5528	0.634876	1.5528	up	3.84289	1.94219	3.84289	up	3.00517	1.58745	3.00517	up	4.522	2.17696	4.522	up	6604	Hs.647067	gb:NM_003078.1 /DB_XREF=gi:4507086 /GEN=SMARCD3 /FEA=FLmRNA /CNT=98 /TID=Hs.71622.0 /TIER=FL+Stack /STK=44 /UG=Hs.71622 /LL=6604 /DEF=Homo sapiens SWISNF related, matrix associated, actin dependent regulator of chromatin, subfamily d, member 3 (SMARCD3), mRNA. /PROD=SWISNF related, matrix associated, actindependent regulator of chromatin, subfamily d, member 3 /FL=gb:NM_003078.1 gb:BC002628.1 gb:…
	227851_s_at	0.0236741	0.000248107	-1.07863	-0.109203	1.07863	down	2.81887	1.49512	2.81887	up	1.71822	0.780918	1.71822	up	1.66402	0.734675	1.66402	up		Hs.464217	gb:AI084056 /DB_XREF=gi:3422479 /DB_XREF=oy72a12.x1 /CLONE=IMAGE:1671358 /FEA=EST /CNT=52 /TID=Hs.162604.1 /TIER=ConsEnd /STK=0 /UG=Hs.162604 /LL=55528 /UG_GENE=DKFZp762M186 /UG_TITLE=hypothetical protein DKFZp762M186
FLII	212024_x_at	0.0237242	0.000249066	1.07878	0.109398	1.07878	up	1.58078	0.66064	1.58078	up	1.53959	0.622546	1.53959	up	1.35205	0.435151	1.35205	up	2314	Hs.513984	gb:U80184 /DB_XREF=gi:2138289 /FEA=DNA /CNT=268 /TID=Hs.83849.2 /TIER=ConsEnd /STK=0 /UG=Hs.83849 /LL=2314 /UG_GENE=FLII /UG_TITLE=flightless I (Drosophila) homolog /DEF=Homo sapiens FLII gene, complete cds
IL6R	217489_s_at	0.0237714	0.000250206	1.02378	0.0339064	1.02378	up	1.16203	0.216645	1.16203	up	-1.13497	-0.182655	1.13497	down	1.85812	0.893845	1.85812	up	3570	Hs.135087	gb:S72848.1 /DB_XREF=gi:633862 /GEN=sIL-6R /FEA=mRNA /CNT=1 /TID=Hs.193400.1 /TIER=ConsEnd /STK=0 /UG=Hs.193400 /LL=3570 /DEF=sIL-6R=Soluble interleukin-6 receptor {alternatively spliced} (human, peripheral blood mononuclear cells (PBMC), mRNA Partial, 162 nt). /PROD=Soluble interleukin-6 receptor
NFU1	218946_at	0.0237714	0.000251087	1.2976	0.375844	1.2976	up	-2.09151	-1.06455	2.09151	down	-1.6874	-0.754801	1.6874	down	-1.68259	-0.750685	1.68259	down	27247	Hs.430439	gb:NM_015700.1 /DB_XREF=gi:7661719 /GEN=HIRIP5 /FEA=FLmRNA /CNT=55 /TID=Hs.17368.0 /TIER=FL+Stack /STK=31 /UG=Hs.17368 /LL=27247 /DEF=Homo sapiens HIRIP5 protein (HIRIP5), mRNA. /PROD=HIRIP5 protein /FL=gb:AF132967.1 gb:NM_015700.1
CETP	206210_s_at	0.0237714	0.000251162	-1.31278	-0.39263	1.31278	down	2.27528	1.18605	2.27528	up	2.20078	1.13802	2.20078	up	2.93906	1.55536	2.93906	up	1071	Hs.89538	gb:NM_000078.1 /DB_XREF=gi:4557442 /GEN=CETP /FEA=FLmRNA /CNT=24 /TID=Hs.89538.0 /TIER=FL+Stack /STK=14 /UG=Hs.89538 /LL=1071 /DEF=Homo sapiens cholesteryl ester transfer protein, plasma (CETP), mRNA. /PROD=cholesteryl ester transfer protein, plasmaprecursor /FL=gb:M30185.1 gb:NM_000078.1
	237746_at	0.0237714	0.0002513	-2.64549	-1.40353	2.64549	down	1.08256	0.114447	1.08256	up	-4.88126	-2.28725	4.88126	down	-1.12333	-0.167779	1.12333	down			gb:AI168187 /DB_XREF=gi:3701357 /DB_XREF=oo09g10.x1 /CLONE=IMAGE:1565730 /FEA=EST /CNT=5 /TID=Hs.143790.0 /TIER=ConsEnd /STK=5 /UG=Hs.143790 /UG_TITLE=ESTs
	231594_at	0.0238361	0.000252458	-1.09369	-0.129199	1.09369	down	-1.01867	-0.026683	1.01867	down	1.30894	0.388403	1.30894	up	-1.1187	-0.161827	1.1187	down			gb:AI139812 /DB_XREF=gi:3645784 /DB_XREF=qd97c10.x1 /CLONE=IMAGE:1737426 /FEA=EST /CNT=11 /TID=Hs.97417.0 /TIER=Stack /STK=9 /UG=Hs.97417 /UG_TITLE=ESTs
NR1D2	209750_at	0.0238361	0.000252856	1.05366	0.0754143	1.05366	up	-1.17088	-0.227595	1.17088	down	-8.03475	-3.00625	8.03475	down	-3.07727	-1.62165	3.07727	down	9975	Hs.37288	gb:N32859 /DB_XREF=gi:1153258 /DB_XREF=yw88d02.s1 /CLONE=IMAGE:259299 /FEA=FLmRNA /CNT=58 /TID=Hs.37288.0 /TIER=Stack /STK=23 /UG=Hs.37288 /LL=9975 /UG_GENE=NR1D2 /UG_TITLE=nuclear receptor subfamily 1, group D, member 2 /FL=gb:D16815.1
HAUS4	218383_at	0.0240774	0.000255856	1.26163	0.33529	1.26163	up	1.84035	0.879978	1.84035	up	1.85806	0.893795	1.85806	up	2.55531	1.3535	2.55531	up	54930	Hs.442782	gb:NM_017815.1 /DB_XREF=gi:8923395 /GEN=FLJ20424 /FEA=FLmRNA /CNT=133 /TID=Hs.8886.0 /TIER=FL+Stack /STK=55 /UG=Hs.8886 /LL=54930 /DEF=Homo sapiens hypothetical protein FLJ20424 (FLJ20424), mRNA. /PROD=hypothetical protein FLJ20424 /FL=gb:BC002554.1 gb:BC001916.1 gb:NM_017815.1
CEP97	219886_at	0.0241706	0.000257289	1.15624	0.209444	1.15624	up	-1.21852	-0.285129	1.21852	down	-1.359	-0.44255	1.359	down	-1.12446	-0.169235	1.12446	down	79598	Hs.444135	gb:NM_024548.1 /DB_XREF=gi:13375710 /GEN=FLJ23047 /FEA=FLmRNA /CNT=17 /TID=Hs.11340.0 /TIER=FL /STK=0 /UG=Hs.11340 /LL=79598 /DEF=Homo sapiens hypothetical protein FLJ23047 (FLJ23047), mRNA. /PROD=hypothetical protein FLJ23047 /FL=gb:NM_024548.1
ZCRB1	225394_s_at	0.0241719	0.000257814	1.14796	0.199073	1.14796	up	-1.63064	-0.705435	1.63064	down	-1.37863	-0.463239	1.37863	down	-1.50416	-0.588958	1.50416	down	85437	Hs.496279	gb:AI146850 /DB_XREF=gi:3674532 /DB_XREF=qb92h08.x1 /CLONE=IMAGE:1707615 /FEA=EST /CNT=84 /TID=Hs.43847.0 /TIER=Stack /STK=30 /UG=Hs.43847 /UG_TITLE=ESTs, Weakly similar to A57198 splicing factor, arginineserine-rich 7 (H.sapiens)
DCAF5	224697_at	0.0241719	0.000258538	1.26075	0.33428	1.26075	up	-1.44035	-0.526417	1.44035	down	1.02847	0.040503	1.02847	up	-1.12526	-0.170258	1.12526	down	8816	Hs.509780	gb:AI568478 /DB_XREF=gi:4531852 /DB_XREF=tn39g06.x1 /CLONE=IMAGE:2170042 /FEA=mRNA /CNT=150 /TID=Hs.284294.0 /TIER=Stack /STK=22 /UG=Hs.284294 /LL=8816 /UG_GENE=BCRP2 /UG_TITLE=Breakpoint cluster region protein, uterine leiomyoma, 2
	234201_x_at	0.0241719	0.000258629	-1.15212	-0.204293	1.15212	down	1.06676	0.0932295	1.06676	up	-1.06429	-0.0898904	1.06429	down	-1.37426	-0.458658	1.37426	down		Hs.636893	gb:AK025167.1 /DB_XREF=gi:10437629 /FEA=mRNA /CNT=1 /TID=Hs.306775.0 /TIER=ConsEnd /STK=0 /UG=Hs.306775 /UG_TITLE=Homo sapiens cDNA: FLJ21514 fis, clone COL05780 /DEF=Homo sapiens cDNA: FLJ21514 fis, clone COL05780.
	215435_at	0.0244852	0.000262741	1.06847	0.095552	1.06847	up	2.9662	1.56861	2.9662	up	1.59978	0.677871	1.59978	up	-1.0602	-0.0843343	1.0602	down		Hs.667774	gb:AK021983.1 /DB_XREF=gi:10433292 /FEA=mRNA /CNT=4 /TID=Hs.306616.0 /TIER=ConsEnd /STK=0 /UG=Hs.306616 /UG_TITLE=Homo sapiens cDNA FLJ11921 fis, clone HEMBB1000318 /DEF=Homo sapiens cDNA FLJ11921 fis, clone HEMBB1000318.
	1570166_a_at	0.0244852	0.000263382	-1.40234	-0.487838	1.40234	down	1.30808	0.387455	1.30808	up	-1.02528	-0.0360118	1.02528	down	-1.1672	-0.223053	1.1672	down		Hs.684461	gb:BC020846.1 /DB_XREF=gi:18088592 /TID=Hs2.320012.1 /CNT=2 /FEA=mRNA /TIER=ConsEnd /STK=0 /UG=Hs.320012 /UG_TITLE=Homo sapiens, Similar to hypothetical protein FLJ13381, clone IMAGE:4719554, mRNA /DEF=Homo sapiens, Similar to hypothetical protein FLJ13381, clone IMAGE:4719554, mRNA.
RBM39	227223_at	0.0244852	0.000263503	-1.35973	-0.443317	1.35973	down	1.04853	0.0683731	1.04853	up	-3.45107	-1.78704	3.45107	down	-2.34438	-1.2292	2.34438	down	9584		gb:BE466173 /DB_XREF=gi:9511948 /DB_XREF=hz60c12.x1 /CLONE=IMAGE:3212374 /FEA=EST /CNT=44 /TID=Hs.145696.2 /TIER=Stack /STK=11 /UG=Hs.145696 /LL=9584 /UG_GENE=CC1.3 /UG_TITLE=splicing factor (CC1.3)
ACTR2	200727_s_at	0.0244852	0.000263773	-1.01817	-0.02598	1.01817	down	-1.03131	-0.044482	1.03131	down	-1.05589	-0.0784538	1.05589	down	2.4579	1.29742	2.4579	up	10097	Hs.744913	gb:AA699583 /DB_XREF=gi:2703730 /DB_XREF=zi42g07.s1 /CLONE=IMAGE:433500 /FEA=FLmRNA /CNT=473 /TID=Hs.42915.0 /TIER=Stack /STK=9 /UG=Hs.42915 /LL=10097 /UG_GENE=ACTR2 /UG_TITLE=ARP2 (actin-related protein 2, yeast) homolog /FL=gb:AF006082.1 gb:NM_005722.1
	214902_x_at	0.0244871	0.000264242	-1.0822	-0.113965	1.0822	down	1.13309	0.180262	1.13309	up	-1.11572	-0.157975	1.11572	down	-1.59675	-0.675138	1.59675	down		Hs.661454	gb:AL080232.1 /DB_XREF=gi:5262725 /FEA=mRNA /CNT=9 /TID=Hs.220696.0 /TIER=ConsEnd /STK=0 /UG=Hs.220696 /UG_TITLE=Homo sapiens mRNA; cDNA DKFZp586A061 (from clone DKFZp586A061) /DEF=Homo sapiens mRNA; cDNA DKFZp586A061 (from clone DKFZp586A061).
COL4A3BP	223466_x_at	0.0246169	0.000266495	1.14398	0.194061	1.14398	up	1.808	0.854395	1.808	up	-1.1008	-0.138548	1.1008	down	-1.12155	-0.165495	1.12155	down	10087	Hs.270437	gb:BC000102.1 /DB_XREF=gi:12652706 /FEA=FLmRNA /CNT=52 /TID=Hs.21276.1 /TIER=FL /STK=0 /UG=Hs.21276 /LL=10087 /UG_GENE=COL4A3BP /DEF=Homo sapiens, Similar to collagen, type IV, alpha 3 (Goodpasture antigen) binding protein, clone MGC:1410, mRNA, complete cds. /PROD=Similar to collagen, type IV, alpha 3(Goodpasture antigen) binding protein /FL=gb:BC000102.1 gb:AF232930.1
HCG11	1557169_x_at	0.0246169	0.000266563	1.05434	0.0763439	1.05434	up	1.64743	0.720218	1.64743	up	1.17156	0.22843	1.17156	up	1.5135	0.597893	1.5135	up	493812	Hs.272939	gb:AK024111.1 /DB_XREF=gi:10436410 /TID=Hs2.272939.1 /CNT=14 /FEA=mRNA /TIER=ConsEnd /STK=1 /UG=Hs.272939 /UG_TITLE=Homo sapiens cDNA FLJ10673 fis, clone NT2RP2006393. /DEF=Homo sapiens cDNA FLJ14049 fis, clone HEMBA1006779.
	239969_at	0.0246169	0.000267322	-1.10007	-0.137599	1.10007	down	1.21026	0.275318	1.21026	up	-1.17383	-0.23122	1.17383	down	-1.516	-0.60027	1.516	down		Hs.672248	gb:AA279691 /DB_XREF=gi:1921289 /DB_XREF=zs92d04.s1 /CLONE=IMAGE:704935 /FEA=EST /CNT=5 /TID=Hs.202365.0 /TIER=ConsEnd /STK=4 /UG=Hs.202365 /UG_TITLE=ESTs
CCSER2	209378_s_at	0.0246169	0.000268661	1.32245	0.40321	1.32245	up	-1.81635	-0.861041	1.81635	down	-1.30607	-0.385232	1.30607	down	-1.40515	-0.490725	1.40515	down	54462	Hs.461988	gb:AI478879 /DB_XREF=gi:4372047 /DB_XREF=tm25a06.x1 /CLONE=IMAGE:2157586 /FEA=FLmRNA /CNT=138 /TID=Hs.81897.0 /TIER=Stack /STK=11 /UG=Hs.81897 /LL=54462 /UG_GENE=KIAA1128 /UG_TITLE=KIAA1128 protein /FL=gb:AF241785.1
STX16	221638_s_at	0.0246169	0.000268771	-1.86024	-0.895487	1.86024	down	1.06653	0.0929261	1.06653	up	-1.38802	-0.473029	1.38802	down	2.21276	1.14585	2.21276	up	8675	Hs.307913///Hs.654868	gb:AF008937.1 /DB_XREF=gi:2352817 /FEA=FLmRNA /CNT=6 /TID=Hs.102178.2 /TIER=FL /STK=0 /UG=Hs.102178 /LL=8675 /UG_GENE=STX16 /DEF=Homo sapiens syntaxin-16C mRNA, complete cds. /PROD=syntaxin-16C /FL=gb:AF008937.1
FDX1	203647_s_at	0.0246169	0.000268947	1.1492	0.200624	1.1492	up	-2.03846	-1.02748	2.03846	down	-1.48374	-0.56924	1.48374	down	-1.42656	-0.512539	1.42656	down	2230	Hs.744	gb:M18003.1 /DB_XREF=gi:182493 /FEA=FLmRNA /CNT=89 /TID=Hs.744.0 /TIER=FL+Stack /STK=13 /UG=Hs.744 /LL=2230 /UG_GENE=FDX1 /DEF=Human ferredoxin mRNA, complete cds. /PROD=ferredoxin /FL=gb:J03548.1 gb:M18003.1 gb:M34788.1 gb:NM_004109.2
RBBP4	210371_s_at	0.0246169	0.000269103	1.03366	0.0477663	1.03366	up	1.57746	0.657601	1.57746	up	1.61363	0.690307	1.61363	up	2.52732	1.33761	2.52732	up	5928	Hs.16003	gb:BC003092.1 /DB_XREF=gi:13111850 /FEA=FLmRNA /CNT=10 /TID=Hs.16003.0 /TIER=FL /STK=0 /UG=Hs.16003 /LL=5928 /UG_GENE=RBBP4 /DEF=Homo sapiens, Similar to retinoblastoma binding protein 4, clone MGC:1393, mRNA, complete cds. /PROD=Similar to retinoblastoma binding protein 4 /FL=gb:NM_005610.1 gb:BC003092.1
HSD17B4	201413_at	0.0246169	0.000269244	1.51097	0.595477	1.51097	up	1.93661	0.953534	1.93661	up	2.16761	1.1161	2.16761	up	2.13764	1.09602	2.13764	up	3295	Hs.406861	gb:NM_000414.1 /DB_XREF=gi:4504504 /GEN=HSD17B4 /FEA=FLmRNA /CNT=236 /TID=Hs.75441.0 /TIER=FL+Stack /STK=57 /UG=Hs.75441 /LL=3295 /DEF=Homo sapiens hydroxysteroid (17-beta) dehydrogenase 4 (HSD17B4), mRNA. /PROD=hydroxysteroid (17-beta) dehydrogenase 4 /FL=gb:NM_000414.1 gb:BC003098.1
	243675_at	0.0246475	0.000270029	-1.35269	-0.43583	1.35269	down	-1.18766	-0.248119	1.18766	down	-1.27891	-0.354915	1.27891	down	-1.67062	-0.740381	1.67062	down		Hs.445342	gb:BF512500 /DB_XREF=gi:11597602 /DB_XREF=UI-H-BI3-alw-h-10-0-UI.s1 /CLONE=IMAGE:3069162 /FEA=EST /CNT=4 /TID=Hs.248689.0 /TIER=ConsEnd /STK=3 /UG=Hs.248689 /UG_TITLE=ESTs
	216524_x_at	0.024653	0.000270541	-1.22023	-0.287157	1.22023	down	1.09248	0.127608	1.09248	up	-1.17634	-0.234311	1.17634	down	-1.59186	-0.670711	1.59186	down		Hs.669936	gb:AL049260.1 /DB_XREF=gi:4500007 /FEA=mRNA /CNT=1 /TID=Hs.302050.0 /TIER=ConsEnd /STK=0 /UG=Hs.302050 /UG_TITLE=Homo sapiens mRNA; cDNA DKFZp564E233 (from clone DKFZp564E233) /DEF=Homo sapiens mRNA; cDNA DKFZp564E233 (from clone DKFZp564E233).
LOC102723809	244270_at	0.0246688	0.000271186	-1.40174	-0.487221	1.40174	down	-1.31787	-0.398212	1.31787	down	-1.31607	-0.396234	1.31607	down	-1.27251	-0.347676	1.27251	down	102723809		gb:AI125785 /DB_XREF=gi:3594299 /DB_XREF=qd95f06.x1 /CLONE=IMAGE:1737251 /FEA=EST /CNT=3 /TID=Hs.153351.0 /TIER=ConsEnd /STK=3 /UG=Hs.153351 /UG_TITLE=ESTs
P4HB	200654_at	0.0246688	0.000271643	1.12664	0.172026	1.12664	up	1.57461	0.654992	1.57461	up	1.66009	0.731263	1.66009	up	2.00819	1.00589	2.00819	up	5034	Hs.464336	gb:J02783.1 /DB_XREF=gi:339646 /GEN=P4HB /FEA=FLmRNA /CNT=484 /TID=Hs.75655.0 /TIER=FL+Stack /STK=229 /UG=Hs.75655 /LL=5034 /UG_TITLE=procollagen-proline, 2-oxoglutarate 4-dioxygenase (proline 4-hydroxylase), beta polypeptide (protein disulfide isomerase; thyroid hormone binding protein p55) /DEF=Human thyroid hormone binding protein (p55) mRNA, complete cds. /FL=gb:J02783.1 gb:NM_000918.1
AGO4	219190_s_at	0.0246688	0.000272307	1.59086	0.669809	1.59086	up	2.22421	1.15329	2.22421	up	2.11128	1.07812	2.11128	up	2.69595	1.43079	2.69595	up	192670	Hs.744858	gb:NM_017629.1 /DB_XREF=gi:8923033 /GEN=FLJ20033 /FEA=FLmRNA /CNT=39 /TID=Hs.134757.0 /TIER=FL+Stack /STK=8 /UG=Hs.134757 /LL=54791 /DEF=Homo sapiens hypothetical protein FLJ20033 (FLJ20033), mRNA. /PROD=hypothetical protein FLJ20033 /FL=gb:NM_017629.1
FAM129A	217967_s_at	0.0246688	0.000272601	2.55641	1.35412	2.55641	up	5.52972	2.46721	5.52972	up	3.68268	1.88075	3.68268	up	3.06606	1.61638	3.06606	up	116496	Hs.518662	gb:AF288391.1 /DB_XREF=gi:12620191 /FEA=FLmRNA /CNT=189 /TID=Hs.48778.0 /TIER=FL+Stack /STK=36 /UG=Hs.48778 /LL=63911 /UG_GENE=NIBAN /DEF=Homo sapiens C1orf24 mRNA, complete cds. /PROD=C1orf24 /FL=gb:AF288391.1 gb:AB050477.1 gb:NM_022083.1
BMP2K	226853_at	0.0246688	0.00027297	1.30613	0.3853	1.30613	up	2.4399	1.28682	2.4399	up	3.19926	1.67774	3.19926	up	2.9598	1.5655	2.9598	up	55589	Hs.146551	gb:AU145366 /DB_XREF=gi:11006887 /DB_XREF=AU145366 /CLONE=HEMBA1004631 /FEA=mRNA /CNT=44 /TID=Hs.49303.0 /TIER=Stack /STK=19 /UG=Hs.49303 /UG_TITLE=Homo sapiens cDNA FLJ11663 fis, clone HEMBA1004631
DSC2	204751_x_at	0.024843	0.000275352	1.28337	0.359941	1.28337	up	3.11663	1.63999	3.11663	up	1.90443	0.92936	1.90443	up	3.93763	1.97733	3.93763	up	1824	Hs.95612	gb:NM_004949.1 /DB_XREF=gi:13435365 /GEN=DSC2 /FEA=FLmRNA /CNT=51 /TID=Hs.239727.0 /TIER=FL /STK=0 /UG=Hs.239727 /LL=1824 /DEF=Homo sapiens desmocollin 2 (DSC2), transcript variant Dsc2b, mRNA. /PROD=desmocollin 2, isoform Dsc2b preproprotein /FL=gb:NM_004949.1
NPEPPS	201454_s_at	0.0248774	0.000276188	-1.03358	-0.0476457	1.03358	down	1.75306	0.809877	1.75306	up	1.26504	0.33918	1.26504	up	1.57868	0.65872	1.57868	up	9520	Hs.443837	gb:AW055008 /DB_XREF=gi:5920711 /DB_XREF=wy98c09.x1 /CLONE=IMAGE:2556592 /FEA=FLmRNA /CNT=256 /TID=Hs.293007.0 /TIER=Stack /STK=26 /UG=Hs.293007 /LL=9520 /UG_GENE=NPEPPS /UG_TITLE=aminopeptidase puromycin sensitive /FL=gb:NM_006310.1
STXBP3	1560486_at	0.0249413	0.000277354	-1.14708	-0.197968	1.14708	down	1.76169	0.816958	1.76169	up	-1.59485	-0.67342	1.59485	down	-1.47659	-0.56227	1.47659	down	6814	Hs.530436	gb:BC028028.1 /DB_XREF=gi:20380108 /TID=Hs2.367967.1 /CNT=3 /FEA=mRNA /TIER=ConsEnd /STK=0 /UG=Hs.367967 /UG_TITLE=Homo sapiens, clone IMAGE:5219755, mRNA, partial cds /DEF=Homo sapiens, clone IMAGE:5219755, mRNA, partial cds.
VPS8	1559500_at	0.025098	0.000279555	-1.49641	-0.58151	1.49641	down	2.40794	1.2678	2.40794	up	-1.58971	-0.66876	1.58971	down	1.15141	0.203396	1.15141	up	23355	Hs.269263	gb:BC036005.1 /DB_XREF=gi:23271187 /TID=Hs2.398163.1 /CNT=6 /FEA=mRNA /TIER=ConsEnd /STK=0 /UG=Hs.398163 /UG_TITLE=Homo sapiens, clone IMAGE:4733107, mRNA /DEF=Homo sapiens, clone IMAGE:4733107, mRNA.
TET3	214754_at	0.0251268	0.000280792	1.11146	0.152457	1.11146	up	1.52952	0.613084	1.52952	up	1.80402	0.851212	1.80402	up	1.72433	0.786033	1.72433	up	200424		gb:AB007861.1 /DB_XREF=gi:2662082 /GEN=KIAA0401 /FEA=mRNA /CNT=39 /TID=Hs.17803.0 /TIER=ConsEnd /STK=0 /UG=Hs.17803 /LL=23298 /UG_TITLE=KIAA0401 protein /DEF=Homo sapiens KIAA0401 mRNA, partial cds.
IQGAP1	200791_s_at	0.0251268	0.000280795	1.3282	0.409474	1.3282	up	1.97188	0.979572	1.97188	up	2.19312	1.13298	2.19312	up	1.76185	0.817089	1.76185	up	8826	Hs.430551	gb:NM_003870.1 /DB_XREF=gi:4506786 /GEN=IQGAP1 /FEA=FLmRNA /CNT=327 /TID=Hs.1742.0 /TIER=FL+Stack /STK=68 /UG=Hs.1742 /LL=8826 /DEF=Homo sapiens IQ motif containing GTPase activating protein 1 (IQGAP1), mRNA. /PROD=IQ motif containing GTPase activating protein 1 /FL=gb:L33075.1 gb:NM_003870.1
	232525_at	0.0254816	0.000285226	-1.13611	-0.184106	1.13611	down	1.63168	0.706361	1.63168	up	-1.03914	-0.0553875	1.03914	down	-1.47165	-0.557436	1.47165	down		Hs.660285	gb:AK025082.1 /DB_XREF=gi:10437525 /FEA=mRNA /CNT=10 /TID=Hs.189282.0 /TIER=ConsEnd /STK=0 /UG=Hs.189282 /UG_TITLE=Homo sapiens cDNA: FLJ21429 fis, clone COL04205 /DEF=Homo sapiens cDNA: FLJ21429 fis, clone COL04205.
PPIG	208994_s_at	0.0256486	0.000287991	-1.22627	-0.294279	1.22627	down	-1.49929	-0.584276	1.49929	down	-2.1695	-1.11736	2.1695	down	-1.63258	-0.707154	1.63258	down	9360	Hs.470544	gb:AI638762 /DB_XREF=gi:4690996 /DB_XREF=tt32a04.x1 /CLONE=IMAGE:2242446 /FEA=FLmRNA /CNT=195 /TID=Hs.77965.0 /TIER=Stack /STK=13 /UG=Hs.77965 /LL=9360 /UG_GENE=PPIG /UG_TITLE=peptidyl-prolyl isomerase G (cyclophilin G) /FL=gb:NM_004792.1 gb:U40763.1
KPNA3	221503_s_at	0.0256486	0.000288033	-1.04748	-0.0669246	1.04748	down	1.01478	0.0211727	1.01478	up	-2.01047	-1.00753	2.01047	down	-1.57903	-0.659035	1.57903	down	3839	Hs.527919	gb:AF034756.1 /DB_XREF=gi:2654138 /GEN=SRP1gamma /FEA=FLmRNA /CNT=192 /TID=Hs.3886.0 /TIER=FL /STK=2 /UG=Hs.3886 /LL=3839 /DEF=Homo sapiens importin-alpha homolog (SRP1gamma) mRNA, complete cds. /PROD=importin-alpha homolog /FL=gb:NM_002267.1 gb:D89618.1 gb:AF034756.1
WHSC1	209052_s_at	0.025743	0.000289565	1.00056	0.00080882	1.00056	up	1.14835	0.199566	1.14835	up	1.40033	0.48577	1.40033	up	1.71932	0.781837	1.71932	up	7468	Hs.113876	gb:BF111870 /DB_XREF=gi:10941560 /DB_XREF=7l36f11.x1 /CLONE=IMAGE:3523724 /FEA=FLmRNA /CNT=235 /TID=Hs.110457.3 /TIER=Stack /STK=26 /UG=Hs.110457 /LL=7468 /UG_GENE=WHSC1 /UG_TITLE=Wolf-Hirschhorn syndrome candidate 1 /FL=gb:AF083389.1
SLC8B1	222727_s_at	0.0258949	0.000291747	1.05169	0.0727082	1.05169	up	1.11153	0.152546	1.11153	up	1.19986	0.262869	1.19986	up	1.78134	0.832963	1.78134	up	80024	Hs.286194	gb:AI339568 /DB_XREF=gi:4076495 /DB_XREF=qk67e10.x1 /CLONE=IMAGE:1874058 /FEA=FLmRNA /CNT=92 /TID=Hs.286194.0 /TIER=Stack /STK=11 /UG=Hs.286194 /LL=80024 /UG_GENE=FLJ22233 /UG_TITLE=hypothetical protein FLJ22233 /FL=gb:NM_024959.1
EIF2S3	205321_at	0.0259272	0.000293067	-1.69253	-0.75918	1.69253	down	1.33315	0.414835	1.33315	up	1.56018	0.641715	1.56018	up	3.21035	1.68273	3.21035	up	1968	Hs.539684	gb:NM_001415.1 /DB_XREF=gi:4503506 /GEN=EIF2S3 /FEA=FLmRNA /CNT=39 /TID=Hs.211539.0 /TIER=FL /STK=0 /UG=Hs.211539 /LL=1968 /DEF=Homo sapiens eukaryotic translation initiation factor 2, subunit 3 (gamma, 52kD) (EIF2S3), mRNA. /PROD=eukaryotic translation initiation factor 2,subunit 3 (gamma, 52kD) /FL=gb:L19161.1 gb:NM_001415.1
CDK9	203198_at	0.0259272	0.000293639	-1.04145	-0.058588	1.04145	down	1.74846	0.806088	1.74846	up	1.43515	0.521206	1.43515	up	2.77663	1.47334	2.77663	up	1025	Hs.150423	gb:NM_001261.1 /DB_XREF=gi:4502746 /GEN=CDK9 /FEA=FLmRNA /CNT=101 /TID=Hs.150423.0 /TIER=FL /STK=0 /UG=Hs.150423 /LL=1025 /DEF=Homo sapiens cyclin-dependent kinase 9 (CDC2-related kinase) (CDK9), mRNA. /PROD=cyclin-dependent kinase 9 (CDC2-related kinase) /FL=gb:NM_001261.1 gb:BC001968.1 gb:L25676.1
MED30	227787_s_at	0.0259272	0.000294191	-1.05848	-0.0819996	1.05848	down	-2.70397	-1.43508	2.70397	down	-2.20135	-1.13839	2.20135	down	-1.54566	-0.628224	1.54566	down	90390	Hs.492612	gb:AI026938 /DB_XREF=gi:3244454 /DB_XREF=ov82f06.x1 /CLONE=IMAGE:1643843 /FEA=EST /CNT=35 /TID=Hs.298229.2 /TIER=Stack /STK=18 /UG=Hs.298229 /LL=5202 /UG_GENE=PFDN2 /UG_TITLE=prefoldin 2
NRG1	208241_at	0.0259272	0.000294755	-1.09023	-0.124635	1.09023	down	2.78781	1.47913	2.78781	up	3.02982	1.59923	3.02982	up	1.64776	0.720507	1.64776	up	3084	Hs.453951	gb:NM_004495.1 /DB_XREF=gi:4758525 /GEN=NRG1 /FEA=FLmRNA /CNT=2 /TID=Hs.172816.4 /TIER=FL /STK=0 /UG=Hs.172816 /LL=3084 /DEF=Homo sapiens neuregulin 1 (NRG1), transcript variant HRG-gamma, mRNA. /PROD=neuregulin 1 isoform HRG-gamma /FL=gb:AF026146.1 gb:NM_004495.1
AKAP13	209534_x_at	0.0259272	0.000294767	-1.0977	-0.134484	1.0977	down	1.04546	0.0641319	1.04546	up	-1.07719	-0.107268	1.07719	down	-1.53602	-0.619197	1.53602	down	11214	Hs.459211	gb:BF222823 /DB_XREF=gi:11130000 /DB_XREF=7q23e12.x1 /CLONE=IMAGE:3699190 /FEA=FLmRNA /CNT=157 /TID=Hs.301946.1 /TIER=Stack /STK=21 /UG=Hs.301946 /LL=3928 /UG_GENE=LBC /UG_TITLE=lymphoid blast crisis oncogene /FL=gb:AF127481.1
C16orf70	223440_at	0.0259272	0.000294956	1.11788	0.160766	1.11788	up	1.66844	0.738502	1.66844	up	1.55875	0.640391	1.55875	up	1.62121	0.69707	1.62121	up	80262	Hs.513666	gb:BC004556.1 /DB_XREF=gi:13528719 /FEA=FLmRNA /CNT=52 /TID=Hs.55923.0 /TIER=FL /STK=0 /UG=Hs.55923 /DEF=Homo sapiens, Similar to CG7083 gene product, clone MGC:10534, mRNA, complete cds. /PROD=Similar to CG7083 gene product /FL=gb:BC004556.1
RAB3D	225001_at	0.0261056	0.000297463	1.27012	0.34496	1.27012	up	2.85499	1.51349	2.85499	up	2.94351	1.55754	2.94351	up	3.26128	1.70544	3.26128	up	9545	Hs.744916	gb:AI744658 /DB_XREF=gi:5112868 /DB_XREF=wg09h11.x1 /CLONE=IMAGE:2364645 /FEA=mRNA /CNT=123 /TID=Hs.8036.0 /TIER=Stack /STK=24 /UG=Hs.8036 /LL=9387 /UG_GENE=GOV /UG_TITLE=glioblastoma overexpressed
CRAT	209522_s_at	0.0261219	0.000298127	1.19747	0.259986	1.19747	up	1.80676	0.853406	1.80676	up	1.68134	0.749613	1.68134	up	1.74465	0.802935	1.74465	up	1384	Hs.12068	gb:BC000723.1 /DB_XREF=gi:13111704 /FEA=FLmRNA /CNT=91 /TID=Hs.12068.2 /TIER=FL+Stack /STK=42 /UG=Hs.12068 /LL=1384 /UG_GENE=CRAT /DEF=Homo sapiens, Similar to carnitine acetyltransferase, clone MGC:1564, mRNA, complete cds. /PROD=Similar to carnitine acetyltransferase /FL=gb:BC000723.1
SPATS1	239870_at	0.0262898	0.000300541	-1.0546	-0.0766913	1.0546	down	1.22245	0.289775	1.22245	up	1.23812	0.308157	1.23812	up	1.11483	0.156826	1.11483	up	221409	Hs.135283	gb:AA400657 /DB_XREF=gi:2054546 /DB_XREF=zu70h10.s1 /CLONE=IMAGE:743395 /FEA=EST /CNT=9 /TID=Hs.135283.0 /TIER=ConsEnd /STK=1 /UG=Hs.135283 /UG_TITLE=ESTs
TM6SF1	219892_at	0.0262898	0.000301104	1.63889	0.712722	1.63889	up	2.36336	1.24084	2.36336	up	2.79267	1.48165	2.79267	up	5.06216	2.33975	5.06216	up	53346	Hs.513094	gb:NM_023003.1 /DB_XREF=gi:13194198 /GEN=TM6SF1 /FEA=FLmRNA /CNT=37 /TID=Hs.133865.0 /TIER=FL /STK=0 /UG=Hs.133865 /LL=53346 /DEF=Homo sapiens transmembrane 6 superfamily member 1 (TM6SF1), mRNA. /PROD=transmembrane 6 superfamily member 1 /FL=gb:NM_023003.1 gb:AF255922.1
	222968_at	0.0262898	0.000301485	1.06823	0.0952191	1.06823	up	-1.22905	-0.297546	1.22905	down	-1.93577	-0.952906	1.93577	down	-2.23267	-1.15877	2.23267	down			gb:NM_016947.1 /DB_XREF=gi:8393383 /GEN=G8 /FEA=FLmRNA /CNT=3 /TID=Hs.109798.0 /TIER=ConsEnd /STK=0 /UG=Hs.109798 /LL=50854 /DEF=Homo sapiens G8 protein (G8), mRNA. /PROD=G8 protein /FL=gb:NM_016947.1
TET2	235461_at	0.0263595	0.000302766	-1.11543	-0.157604	1.11543	down	1.10796	0.147902	1.10796	up	-1.18593	-0.246025	1.18593	down	1.72046	0.782791	1.72046	up	54790	Hs.367639///Hs.706276	gb:BG250414 /DB_XREF=gi:12760230 /DB_XREF=602362567F1 /CLONE=IMAGE:4470905 /FEA=EST /CNT=21 /TID=Hs.132826.0 /TIER=ConsEnd /STK=0 /UG=Hs.132826 /UG_TITLE=ESTs, Highly similar to unnamed protein product (H.sapiens)
PIK3C2A	235792_x_at	0.026403	0.000303749	1.00456	0.00656984	1.00456	up	1.37485	0.459277	1.37485	up	1.05471	0.0768496	1.05471	up	-1.22035	-0.287291	1.22035	down	5286	Hs.175343	gb:AU154663 /DB_XREF=gi:11016184 /DB_XREF=AU154663 /CLONE=NT2RP4001741 /FEA=EST /CNT=7 /TID=Hs.207212.0 /TIER=ConsEnd /STK=7 /UG=Hs.207212 /UG_TITLE=ESTs, Moderately similar to alternatively spliced product using exon 13A (H.sapiens)
	241841_at	0.026405	0.000304255	1.04698	0.0662317	1.04698	up	1.42127	0.507181	1.42127	up	1.95178	0.964791	1.95178	up	1.02908	0.0413584	1.02908	up			gb:AI298755 /DB_XREF=gi:3958491 /DB_XREF=qn02g10.x1 /CLONE=IMAGE:1897122 /FEA=EST /CNT=5 /TID=Hs.164964.0 /TIER=ConsEnd /STK=3 /UG=Hs.164964 /UG_TITLE=ESTs
FLOT2	211299_s_at	0.0266357	0.000307401	-1.21114	-0.276363	1.21114	down	1.90957	0.933248	1.90957	up	1.32531	0.40633	1.32531	up	2.86856	1.52032	2.86856	up	2319	Hs.514038	gb:BC003683.1 /DB_XREF=gi:13277549 /FEA=FLmRNA /CNT=1 /TID=Hs.184488.1 /TIER=FL /STK=0 /UG=Hs.184488 /LL=2319 /UG_GENE=FLOT2 /DEF=Homo sapiens, Similar to flotillin 2, clone MGC:5052, mRNA, complete cds. /PROD=Similar to flotillin 2 /FL=gb:BC003683.1
ST6GAL1	214971_s_at	0.0267831	0.000309591	-1.14532	-0.195747	1.14532	down	1.09538	0.131436	1.09538	up	-1.0301	-0.0427782	1.0301	down	2.63991	1.40049	2.63991	up	6480	Hs.207459	gb:AV695711 /DB_XREF=gi:10297574 /DB_XREF=AV695711 /CLONE=GKCDXA06 /FEA=mRNA /CNT=10 /TID=Hs.2554.1 /TIER=ConsEnd /STK=0 /UG=Hs.2554 /LL=6480 /UG_GENE=SIAT1 /UG_TITLE=sialyltransferase 1 (beta-galactoside alpha-2,6-sialytransferase)
ZAK	238613_at	0.0267883	0.000310142	1.01805	0.0258095	1.01805	up	1.47462	0.560345	1.47462	up	1.43006	0.516077	1.43006	up	1.46316	0.549085	1.46316	up	51776	Hs.444451	gb:AI475164 /DB_XREF=gi:4328209 /DB_XREF=tl79d03.x1 /CLONE=IMAGE:2153285 /FEA=EST /CNT=9 /TID=Hs.238442.0 /TIER=ConsEnd /STK=1 /UG=Hs.238442 /UG_TITLE=ESTs, Moderately similar to ALU7_HUMAN ALU SUBFAMILY SQ SEQUENCE CONTAMINATION WARNING ENTRY (H.sapiens)
NDUFA12	223244_s_at	0.026892	0.000312472	-1.07926	-0.110041	1.07926	down	-1.74578	-0.803873	1.74578	down	-1.51276	-0.597179	1.51276	down	-1.44825	-0.534312	1.44825	down	55967	Hs.506374	gb:AF217092.1 /DB_XREF=gi:9651636 /FEA=FLmRNA /CNT=101 /TID=Hs.44163.0 /TIER=FL /STK=0 /UG=Hs.44163 /LL=55967 /UG_GENE=LOC55967 /DEF=Homo sapiens NADH:ubiquinone oxidoreductase 17.2-kDa subunit mRNA, complete cds. /PROD=NADH:ubiquinone oxidoreductase 17.2-kDa subunit /FL=gb:NM_018838.1 gb:AF112208.1 gb:AF217092.1
CES2	213509_x_at	0.026892	0.000312602	1.0635	0.0888213	1.0635	up	1.3639	0.447736	1.3639	up	1.42132	0.507226	1.42132	up	1.11397	0.155712	1.11397	up	8824	Hs.282975	gb:AW157619 /DB_XREF=gi:6229020 /DB_XREF=au85a11.x1 /CLONE=IMAGE:2783036 /FEA=EST /CNT=28 /TID=Hs.282975.1 /TIER=Stack /STK=13 /UG=Hs.282975 /LL=8824 /UG_GENE=CES2 /UG_TITLE=carboxylesterase 2 (intestine, liver)
	215592_at	0.026892	0.000313551	-1.40067	-0.486112	1.40067	down	-1.16314	-0.218026	1.16314	down	-3.60424	-1.8497	3.60424	down	-3.30265	-1.72362	3.30265	down		Hs.633779	gb:AU147620 /DB_XREF=gi:11009141 /DB_XREF=AU147620 /CLONE=MAMMA1001206 /FEA=mRNA /CNT=4 /TID=Hs.288490.0 /TIER=ConsEnd /STK=1 /UG=Hs.288490 /UG_TITLE=Homo sapiens cDNA FLJ12232 fis, clone MAMMA1001206
CARS	240983_s_at	0.026892	0.00031356	-1.03825	-0.0541606	1.03825	down	1.10885	0.149059	1.10885	up	1.20514	0.269195	1.20514	up	1.73059	0.791265	1.73059	up	833	Hs.274873	gb:AW292273 /DB_XREF=gi:6698909 /DB_XREF=UI-H-BI2-agy-b-10-0-UI.s1 /CLONE=IMAGE:2725962 /FEA=EST /CNT=4 /TID=Hs.197927.0 /TIER=ConsEnd /STK=4 /UG=Hs.197927 /UG_TITLE=ESTs, Moderately similar to SYC_HUMAN CYSTEINYL-TRNA SYNTHETASE (H.sapiens)
ZNF516	203604_at	0.026892	0.000314126	1.07225	0.100637	1.07225	up	2.12856	1.08988	2.12856	up	2.24408	1.16613	2.24408	up	2.18272	1.12613	2.18272	up	9658	Hs.436973	gb:N38750 /DB_XREF=gi:1161957 /DB_XREF=yy42c06.s1 /CLONE=IMAGE:273898 /FEA=FLmRNA /CNT=107 /TID=Hs.48450.0 /TIER=Stack /STK=52 /UG=Hs.48450 /LL=9658 /UG_GENE=KIAA0222 /UG_TITLE=KIAA0222 gene product /FL=gb:D86975.1 gb:NM_014643.1
	243593_s_at	0.026892	0.00031486	-1.1253	-0.170304	1.1253	down	-1.27524	-0.350764	1.27524	down	-2.01573	-1.0113	2.01573	down	-2.62576	-1.39274	2.62576	down		Hs.660616	gb:BF003018 /DB_XREF=gi:10703293 /DB_XREF=7g52f03.x1 /CLONE=IMAGE:3310109 /FEA=EST /CNT=3 /TID=Hs.225026.1 /TIER=ConsEnd /STK=3 /UG=Hs.225026 /UG_TITLE=ESTs
SLC25A37	218978_s_at	0.026892	0.000315265	-1.30712	-0.386391	1.30712	down	3.252	1.70133	3.252	up	1.94193	0.957494	1.94193	up	1.98378	0.988255	1.98378	up	51312	Hs.726050	gb:NM_018586.1 /DB_XREF=gi:8924059 /GEN=PRO1584 /FEA=FLmRNA /CNT=58 /TID=Hs.283716.0 /TIER=FL+Stack /STK=27 /UG=Hs.283716 /LL=55881 /DEF=Homo sapiens hypothetical protein PRO1584 (PRO1584), mRNA. /PROD=hypothetical protein PRO1584 /FL=gb:AF116640.1 gb:NM_018586.1
	231042_s_at	0.026892	0.0003155	-1.13971	-0.188666	1.13971	down	-2.72286	-1.44512	2.72286	down	-4.43136	-2.14775	4.43136	down	-3.47449	-1.7968	3.47449	down		Hs.708073	gb:AA809487 /DB_XREF=gi:2878893 /DB_XREF=ob85c12.s1 /CLONE=IMAGE:1338166 /FEA=EST /CNT=10 /TID=Hs.111460.2 /TIER=Stack /STK=8 /UG=Hs.111460 /UG_TITLE=Homo sapiens cDNA: FLJ21715 fis, clone COL10287, highly similar to AF071569 Homo sapiens multifunctional calciumcalmodulin-dependent protein kinase II delta2 isoform mRNA
	AFFX-M27830_M_at	0.026892	0.000315769	1.06394	0.0894102	1.06394	up	-1.39542	-0.480694	1.39542	down	-1.99134	-0.993742	1.99134	down	-2.49821	-1.32089	2.49821	down			H. sapiens /GEN=28S rRNA /DB_XREF=gb:M27830.1 /NOTE=SIF corresponding to nucleotides 529-1289 of gb:M27830.1 /DEF=Human 28S ribosomal RNA gene, complete cds.
	236177_s_at	0.0269899	0.000317748	1.08653	0.119723	1.08653	up	-1.2175	-0.283918	1.2175	down	-1.12264	-0.16689	1.12264	down	-1.28254	-0.359005	1.28254	down		Hs.222218	gb:BE669874 /DB_XREF=gi:10030415 /DB_XREF=7e26c08.x1 /CLONE=IMAGE:3283598 /FEA=EST /CNT=9 /TID=Hs.126680.0 /TIER=ConsEnd /STK=2 /UG=Hs.126680 /UG_TITLE=ESTs
ANP32A-IT1	220710_at	0.0269899	0.000317906	-1.13464	-0.182234	1.13464	down	3.78309	1.91956	3.78309	up	3.50902	1.81107	3.50902	up	1.65448	0.72638	1.65448	up	80035	Hs.662150	gb:NM_024970.1 /DB_XREF=gi:13376465 /GEN=FLJ11722 /FEA=FLmRNA /CNT=4 /TID=Hs.287444.0 /TIER=FL /STK=0 /UG=Hs.287444 /LL=80035 /DEF=Homo sapiens hypothetical protein FLJ11722 (FLJ11722), mRNA. /PROD=hypothetical protein FLJ11722 /FL=gb:NM_024970.1
PPARD	37152_at	0.0270931	0.00031986	1.27568	0.351262	1.27568	up	-1.78114	-0.832799	1.78114	down	-1.20991	-0.274896	1.20991	down	-1.29428	-0.372147	1.29428	down	5467	Hs.696032	Cluster Incl. L07592:Human peroxisome proliferator activated receptor mRNA, complete cds /cds=(337,1662) /gb=L07592 /gi=190229 /ug=Hs.106415 /len=3301
TRPV2	222855_s_at	0.0270931	0.000320112	-1.17444	-0.231967	1.17444	down	1.18923	0.250022	1.18923	up	-1.0716	-0.0997675	1.0716	down	1.83057	0.872292	1.83057	up	51393	Hs.279746	gb:BF058747 /DB_XREF=gi:10812643 /DB_XREF=7k34c09.x1 /CLONE=IMAGE:3477137 /FEA=FLmRNA /CNT=48 /TID=Hs.279746.0 /TIER=Stack /STK=14 /UG=Hs.279746 /LL=51370 /UG_GENE=VRL-1 /UG_TITLE=vanilloid receptor-like protein 1 /FL=gb:AF129112.1 gb:NM_015930.1
MLLT1	224993_at	0.0271211	0.000321166	1.14419	0.194326	1.14419	up	1.59162	0.670496	1.59162	up	1.52167	0.605651	1.52167	up	1.45579	0.541804	1.45579	up	4298	Hs.10095	gb:AW962605 /DB_XREF=gi:8152441 /DB_XREF=EST374678 /FEA=mRNA /CNT=168 /TID=Hs.10095.0 /TIER=Stack /STK=79 /UG=Hs.10095 /LL=56930 /UG_GENE=LOC56930 /UG_TITLE=hypothetical protein from EUROIMAGE 1669387
	239783_at	0.0271211	0.000321435	-1.18616	-0.246304	1.18616	down	1.22444	0.292119	1.22444	up	1.21532	0.281332	1.21532	up	-1.20181	-0.265203	1.20181	down		Hs.671399	gb:AV699637 /DB_XREF=gi:10301608 /DB_XREF=AV699637 /CLONE=GKCALB05 /FEA=EST /CNT=4 /TID=Hs.285371.0 /TIER=ConsEnd /STK=4 /UG=Hs.285371 /UG_TITLE=ESTs
DPYSL2	200762_at	0.0271735	0.000322553	1.51895	0.603072	1.51895	up	2.38651	1.2549	2.38651	up	2.86665	1.51937	2.86665	up	2.32707	1.21851	2.32707	up	1808	Hs.593187	gb:NM_001386.1 /DB_XREF=gi:4503376 /GEN=DPYSL2 /FEA=FLmRNA /CNT=327 /TID=Hs.173381.0 /TIER=FL+Stack /STK=66 /UG=Hs.173381 /LL=1808 /DEF=Homo sapiens dihydropyrimidinase-like 2 (DPYSL2), mRNA. /PROD=dihydropyrimidinase-like 2 /FL=gb:D78013.1 gb:U97105.1 gb:NM_001386.1 gb:U17279.1
LMBR1	242035_at	0.0272758	0.000324267	1.22622	0.294214	1.22622	up	-1.63185	-0.706512	1.63185	down	-1.4929	-0.578114	1.4929	down	-1.37007	-0.454254	1.37007	down	64327		gb:AA805681 /DB_XREF=gi:2874431 /DB_XREF=nz41d05.s1 /CLONE=IMAGE:1290345 /FEA=EST /CNT=5 /TID=Hs.88401.0 /TIER=ConsEnd /STK=0 /UG=Hs.88401 /UG_TITLE=ESTs, Moderately similar to AC005534 2 supported by human ESTs AA412402 (H.sapiens)
CALU	200756_x_at	0.0273464	0.000325606	1.02333	0.0332773	1.02333	up	1.39746	0.482812	1.39746	up	1.0847	0.117296	1.0847	up	1.52517	0.608974	1.52517	up	813	Hs.743262	gb:U67280.1 /DB_XREF=gi:2809323 /FEA=FLmRNA /CNT=452 /TID=Hs.7753.0 /TIER=FL /STK=0 /UG=Hs.7753 /LL=813 /UG_GENE=CALU /DEF=Homo sapiens calumenin mRNA, complete cds. /PROD=calumenin /FL=gb:AF013759.1 gb:U67280.1 gb:NM_001219.2
BICD2	1553021_s_at	0.027352	0.000326173	1.04609	0.0650135	1.04609	up	1.66819	0.738286	1.66819	up	1.14238	0.192037	1.14238	up	1.60566	0.683163	1.60566	up	23299	Hs.436939	gb:NM_015250.1 /DB_XREF=gi:21735416 /GEN=BICD2 /TID=Hs2.330988.1 /CNT=2 /FEA=FLmRNA /TIER=FL /STK=2 /LL=23299 /UG=Hs.330988 /DEF=Homo sapiens coiled-coil protein BICD2 (BICD2), mRNA. /PROD=coiled-coil protein BICD2 /FL=gb:NM_015250.1 gb:AY052562.1
DSCC1	219000_s_at	0.0273908	0.000327137	1.47282	0.55858	1.47282	up	-1.06025	-0.0844054	1.06025	down	1.10862	0.148767	1.10862	up	-1.00587	-0.00844674	1.00587	down	79075	Hs.315167	gb:NM_024094.1 /DB_XREF=gi:13129095 /GEN=MGC5528 /FEA=FLmRNA /CNT=51 /TID=Hs.315167.0 /TIER=FL /STK=7 /UG=Hs.315167 /LL=79075 /DEF=Homo sapiens hypothetical protein MGC5528 (MGC5528), mRNA. /PROD=hypothetical protein MGC5528 /FL=gb:BC001316.1 gb:NM_024094.1
MACF1	232168_x_at	0.0274213	0.000329114	-1.37051	-0.454718	1.37051	down	-1.01485	-0.0212662	1.01485	down	-1.13502	-0.182715	1.13502	down	-1.67585	-0.744891	1.67585	down	23499	Hs.472475	gb:AK023821.1 /DB_XREF=gi:10435872 /FEA=mRNA /CNT=10 /TID=Hs.296150.0 /TIER=ConsEnd /STK=3 /UG=Hs.296150 /UG_TITLE=Homo sapiens cDNA FLJ13759 fis, clone PLACE3000416, highly similar to Homo sapiens mRNA for actin binding protein ABP620 /DEF=Homo sapiens cDNA FLJ13759 fis, clone PLACE3000416, highly similar to Homo sapiens mRNA for actin binding protein ABP620.
	1559037_a_at	0.0274213	0.000329185	-1.29535	-0.373347	1.29535	down	-1.55429	-0.636253	1.55429	down	-1.50048	-0.585427	1.50048	down	-1.84997	-0.887504	1.84997	down		Hs.671722	gb:AL041381 /DB_XREF=gi:5420732 /DB_XREF=DKFZp434B1817_s1 /CLONE=DKFZp434B1817 /TID=Hs2.182210.1 /CNT=8 /FEA=mRNA /TIER=ConsEnd /STK=0 /UG=Hs.182210 /UG_TITLE=Homo sapiens cDNA FLJ32512 fis, clone SMINT1000075.
URB1-AS1	227424_x_at	0.0274213	0.000329245	-1.19071	-0.251827	1.19071	down	-1.55177	-0.633911	1.55177	down	-1.14421	-0.194348	1.14421	down	-1.39981	-0.485229	1.39981	down	84996	Hs.58149	gb:AI800837 /DB_XREF=gi:5366309 /DB_XREF=wg13h01.x1 /CLONE=IMAGE:2365009 /FEA=EST /CNT=46 /TID=Hs.58149.0 /TIER=Stack /STK=36 /UG=Hs.58149 /UG_TITLE=ESTs
ELANE	206871_at	0.0274213	0.000329841	-2.1893	-1.13047	2.1893	down	6.59214	2.72075	6.59214	up	2.72393	1.44569	2.72393	up	15.6096	3.96436	15.6096	up	1991	Hs.99863	gb:NM_001972.1 /DB_XREF=gi:4503548 /GEN=ELA2 /FEA=FLmRNA /CNT=16 /TID=Hs.99863.0 /TIER=FL /STK=5 /UG=Hs.99863 /LL=1991 /DEF=Homo sapiens elastase 2, neutrophil (ELA2), mRNA. /PROD=elastase 2, neutrophil /FL=gb:NM_001972.1 gb:M34379.1
NDUFB1	243630_at	0.0274213	0.000330009	-1.05043	-0.0709844	1.05043	down	1.63242	0.707014	1.63242	up	1.12073	0.164433	1.12073	up	1.0394	0.0557444	1.0394	up	4707	Hs.183435	gb:BF528375 /DB_XREF=gi:11615738 /DB_XREF=602043714F1 /CLONE=IMAGE:4181499 /FEA=EST /CNT=5 /TID=Hs.196846.0 /TIER=ConsEnd /STK=0 /UG=Hs.196846 /UG_TITLE=ESTs, Moderately similar to unnamed protein product (H.sapiens)
OSBPL8	228986_at	0.0274271	0.00033076	-1.2452	-0.316374	1.2452	down	1.39556	0.48084	1.39556	up	1.01114	0.0159857	1.01114	up	1.93585	0.95297	1.93585	up	114882	Hs.430849	gb:AW978375 /DB_XREF=gi:8169640 /DB_XREF=EST390484 /FEA=EST /CNT=24 /TID=Hs.321129.0 /TIER=ConsEnd /STK=0 /UG=Hs.321129 /UG_TITLE=ESTs, Weakly similar to predicted using Genefinder (C.elegans)
DIAPH2	217246_s_at	0.0274271	0.000331082	-1.06877	-0.0959477	1.06877	down	1.19624	0.258505	1.19624	up	1.10473	0.143695	1.10473	up	1.3671	0.451115	1.3671	up	1730	Hs.226483	gb:L22650.1 /DB_XREF=gi:468321 /FEA=mRNA /CNT=1 /TID=Hs.157431.0 /TIER=ConsEnd /STK=0 /UG=Hs.157431 /LL=10824 /UG_GENE=EPAG /DEF=Human early lymphoid activation protein (EPAG) mRNA sequence. /PROD=early lymphoid activation protein
RNF213	241347_at	0.0275853	0.000334119	-1.26974	-0.344529	1.26974	down	-1.66197	-0.732897	1.66197	down	-1.96979	-0.978044	1.96979	down	-3.2875	-1.71699	3.2875	down	57674	Hs.740662	gb:AA936632 /DB_XREF=gi:3094550 /DB_XREF=om58b03.s1 /CLONE=IMAGE:1551341 /FEA=EST /CNT=9 /TID=Hs.189284.0 /TIER=ConsEnd /STK=3 /UG=Hs.189284 /UG_TITLE=ESTs
PBX2	211097_s_at	0.0275853	0.000334295	1.07404	0.103045	1.07404	up	1.69493	0.761223	1.69493	up	1.23033	0.299043	1.23033	up	2.05084	1.03621	2.05084	up	5089	Hs.509545	gb:BC003111.1 /DB_XREF=gi:13111886 /FEA=FLmRNA /CNT=1 /TID=Hs.93728.1 /TIER=FL /STK=0 /UG=Hs.93728 /LL=5089 /UG_GENE=PBX2 /DEF=Homo sapiens, Similar to pre-B-cell leukemia transcription factor 2, clone MGC:2174, mRNA, complete cds. /PROD=Similar to pre-B-cell leukemia transcriptionfactor 2 /FL=gb:BC003111.1
TSR1	218155_x_at	0.0275853	0.000335155	-1.23004	-0.298702	1.23004	down	-1.04143	-0.0585659	1.04143	down	-1.20898	-0.273791	1.20898	down	-1.7769	-0.829361	1.7769	down	55720	Hs.388170	gb:AK026565.1 /DB_XREF=gi:10439447 /FEA=FLmRNA /CNT=111 /TID=Hs.204501.0 /TIER=ConsEnd /STK=0 /UG=Hs.204501 /LL=55720 /UG_GENE=FLJ10534 /UG_TITLE=hypothetical protein FLJ10534 /DEF=Homo sapiens cDNA: FLJ22912 fis, clone KAT06132. /FL=gb:NM_018128.1
ST3GAL6	213355_at	0.0275853	0.000335164	1.5984	0.676632	1.5984	up	2.48282	1.31198	2.48282	up	2.78245	1.47636	2.78245	up	2.63109	1.39566	2.63109	up	10402	Hs.148716	gb:AI989567 /DB_XREF=gi:5836448 /DB_XREF=ws34e03.x1 /CLONE=IMAGE:2499100 /FEA=mRNA /CNT=59 /TID=Hs.34578.2 /TIER=Stack /STK=14 /UG=Hs.34578 /LL=10402 /UG_GENE=ST3GALVI /UG_TITLE=alpha2,3-sialyltransferase
JAK1	1552611_a_at	0.0275853	0.000335514	-1.14368	-0.193678	1.14368	down	-1.69569	-0.761871	1.69569	down	-1.81286	-0.858265	1.81286	down	1.23819	0.308238	1.23819	up	3716	Hs.207538	gb:AL555086 /DB_XREF=gi:12896484 /DB_XREF=AL555086 /CLONE=CS0DK007YI17 (5 prime) /TID=Hs2.50651.1 /CNT=135 /FEA=FLmRNA /TIER=Stack /STK=12 /LL=3716 /UG_GENE=JAK1 /UG=Hs.50651 /UG_TITLE=Janus kinase 1 (a protein tyrosine kinase) /FL=gb:M64174.1 gb:NM_002227.1
	228746_s_at	0.0276678	0.000337367	1.07312	0.101812	1.07312	up	-1.39128	-0.476411	1.39128	down	-1.76252	-0.817637	1.76252	down	-1.82763	-0.869977	1.82763	down		Hs.719439	gb:AV646549 /DB_XREF=gi:9867563 /DB_XREF=AV646549 /CLONE=GLCAOF02 /FEA=EST /CNT=25 /TID=Hs.283690.0 /TIER=Stack /STK=14 /UG=Hs.283690 /LL=55573 /UG_GENE=H41 /UG_TITLE=hypothetical protein
MLXIP	211789_s_at	0.0276678	0.00033753	1.00289	0.00416613	1.00289	up	1.1785	0.236952	1.1785	up	1.283	0.359522	1.283	up	1.69463	0.760972	1.69463	up	22877	Hs.721711///Hs.731847	gb:AF312918.1 /DB_XREF=gi:11321340 /FEA=FLmRNA /CNT=28 /TID=Hs.52081.2 /TIER=FL /STK=0 /UG=Hs.52081 /LL=22877 /UG_GENE=MONDOA /DEF=Homo sapiens MondoA mRNA, complete cds. /PROD=MondoA /FL=gb:AF312918.1
SH2D4A	219749_at	0.0276829	0.00033822	-1.08314	-0.115223	1.08314	down	1.38387	0.468711	1.38387	up	1.2289	0.297363	1.2289	up	1.03921	0.0554912	1.03921	up	63898	Hs.303208	gb:NM_022071.1 /DB_XREF=gi:11545782 /GEN=FLJ20967 /FEA=FLmRNA /CNT=22 /TID=Hs.17433.0 /TIER=FL /STK=0 /UG=Hs.17433 /LL=63898 /DEF=Homo sapiens hypothetical protein FLJ20967 (FLJ20967), mRNA. /PROD=hypothetical protein FLJ20967 /FL=gb:NM_022071.1
LOC100289333	233775_x_at	0.0277377	0.000340143	-1.47486	-0.560578	1.47486	down	-1.10138	-0.139314	1.10138	down	-1.43225	-0.518282	1.43225	down	-2.08034	-1.05682	2.08034	down	100289333	Hs.703794	gb:AK023304.1 /DB_XREF=gi:10435181 /FEA=mRNA /CNT=2 /TID=Hs.296731.0 /TIER=ConsEnd /STK=0 /UG=Hs.296731 /UG_TITLE=Homo sapiens cDNA FLJ13242 fis, clone OVARC1000578 /DEF=Homo sapiens cDNA FLJ13242 fis, clone OVARC1000578.
TSHZ3	223393_s_at	0.0277377	0.000340371	1.99545	0.996713	1.99545	up	4.4056	2.13934	4.4056	up	2.9519	1.56164	2.9519	up	3.51137	1.81203	3.51137	up	57616	Hs.278436	gb:AL136805.1 /DB_XREF=gi:12053120 /GEN=DKFZp434J1521 /FEA=FLmRNA /CNT=73 /TID=Hs.278436.0 /TIER=FL /STK=0 /UG=Hs.278436 /LL=57616 /DEF=Homo sapiens mRNA; cDNA DKFZp434J1521 (from clone DKFZp434J1521); complete cds. /PROD=hypothetical protein /FL=gb:AL136805.1
	238279_x_at	0.0277377	0.000340411	-1.42033	-0.506227	1.42033	down	1.08277	0.11473	1.08277	up	-1.31697	-0.397219	1.31697	down	-1.4802	-0.565789	1.4802	down			gb:BF062155 /DB_XREF=gi:10821065 /DB_XREF=7k73a01.x1 /CLONE=IMAGE:3480864 /FEA=EST /CNT=5 /TID=Hs.270437.0 /TIER=ConsEnd /STK=5 /UG=Hs.270437 /UG_TITLE=ESTs, Weakly similar to A46010 X-linked retinopathy protein (H.sapiens)
KLRC3	207723_s_at	0.0279041	0.000343119	1.32396	0.404859	1.32396	up	-5.85354	-2.54931	5.85354	down	-2.54364	-1.34689	2.54364	down	-4.49753	-2.16913	4.49753	down	3823	Hs.654362	gb:NM_002261.1 /DB_XREF=gi:4504884 /GEN=KLRC3 /FEA=FLmRNA /CNT=6 /TID=Hs.258850.1 /TIER=FL /STK=2 /UG=Hs.258850 /LL=3823 /DEF=Homo sapiens killer cell lectin-like receptor subfamily C, member 3 (KLRC3), transcript variant NKG2-E, mRNA. /PROD=killer cell lectin-like receptor subfamily C,member 3 isoform NKG2-E /FL=gb:NM_002261.1 gb:L14542.1
SESN3	235150_at	0.0279041	0.000343475	-1.1926	-0.254105	1.1926	down	1.12372	0.168281	1.12372	up	-1.08386	-0.116182	1.08386	down	1.93067	0.949103	1.93067	up	143686	Hs.120633	gb:AW376955 /DB_XREF=gi:6881618 /DB_XREF=IL3-CT0219-291099-021-C08 /FEA=EST /CNT=52 /TID=Hs.34636.0 /TIER=ConsEnd /STK=0 /UG=Hs.34636 /UG_TITLE=ESTs
KLHDC3	208784_s_at	0.0279225	0.000344212	1.07004	0.097665	1.07004	up	1.42601	0.511982	1.42601	up	1.49902	0.584018	1.49902	up	1.50454	0.589326	1.50454	up	116138	Hs.412468	gb:BC001793.1 /DB_XREF=gi:12804724 /FEA=FLmRNA /CNT=398 /TID=Hs.281706.0 /TIER=FL+Stack /STK=130 /UG=Hs.281706 /LL=6272 /UG_GENE=SORT1 /DEF=Homo sapiens, clone MGC:3124, mRNA, complete cds. /PROD=Unknown (protein for MGC:3124) /FL=gb:BC000295.1 gb:BC001793.1 gb:BC001789.1
AGO1	222576_s_at	0.0279797	0.000345592	-1.00839	-0.01206	1.00839	down	1.89791	0.924409	1.89791	up	-1.12794	-0.173685	1.12794	down	1.18588	0.245959	1.18588	up	26523	Hs.22867	gb:AW071829 /DB_XREF=gi:6026754 /DB_XREF=ws54b07.x1 /CLONE=IMAGE:2500981 /FEA=FLmRNA /CNT=113 /TID=Hs.14520.0 /TIER=Stack /STK=10 /UG=Hs.14520 /LL=26523 /UG_GENE=EIF2C1 /UG_TITLE=eukaryotic translation initiation factor 2C, 1 /FL=gb:NM_012199.1 gb:AF093097.1
SIK3	204155_s_at	0.0279797	0.000346043	1.02055	0.0293436	1.02055	up	-1.05043	-0.0709861	1.05043	down	1.35935	0.442921	1.35935	up	1.07039	0.0981342	1.07039	up	23387	Hs.167451	gb:AA044154 /DB_XREF=gi:1522030 /DB_XREF=zk50b06.r1 /CLONE=IMAGE:486227 /FEA=FLmRNA /CNT=104 /TID=Hs.4278.0 /TIER=ConsEnd /STK=0 /UG=Hs.4278 /LL=23387 /UG_GENE=KIAA0999 /UG_TITLE=KIAA0999 protein /FL=gb:NM_025164.1
SCAMP1	206668_s_at	0.0279797	0.000346452	-1.27661	-0.352317	1.27661	down	-1.29196	-0.369563	1.29196	down	-1.90872	-0.932604	1.90872	down	1.00681	0.00979114	1.00681	up	9522	Hs.482587	gb:NM_004866.1 /DB_XREF=gi:4759063 /GEN=SCAMP1 /FEA=FLmRNA /CNT=10 /TID=Hs.31218.0 /TIER=FL /STK=0 /UG=Hs.31218 /LL=9522 /DEF=Homo sapiens secretory carrier membrane protein 1 (SCAMP1), mRNA. /PROD=secretory carrier membrane protein 1 /FL=gb:AF038966.1 gb:AF005037.1 gb:NM_004866.1
RIOK3	215588_x_at	0.0280219	0.000347829	-1.32018	-0.400735	1.32018	down	1.16723	0.223089	1.16723	up	-1.11243	-0.153717	1.11243	down	-1.98032	-0.98573	1.98032	down	8780		gb:AK024958.1 /DB_XREF=gi:10437382 /FEA=mRNA /CNT=4 /TID=Hs.287658.0 /TIER=ConsEnd /STK=0 /UG=Hs.287658 /UG_TITLE=Homo sapiens cDNA: FLJ21305 fis, clone COL02124 /DEF=Homo sapiens cDNA: FLJ21305 fis, clone COL02124.
CLEC2B	209732_at	0.0280219	0.000348272	1.2751	0.350608	1.2751	up	-1.85113	-0.888403	1.85113	down	-1.61932	-0.695384	1.61932	down	-1.65473	-0.726598	1.65473	down	9976	Hs.85201	gb:BC005254.1 /DB_XREF=gi:13528920 /FEA=FLmRNA /CNT=70 /TID=Hs.85201.0 /TIER=FL+Stack /STK=18 /UG=Hs.85201 /LL=9976 /UG_GENE=CLECSF2 /DEF=Homo sapiens, Similar to C-type (calcium dependent, carbohydrate-recognition domain) lectin, superfamily member 2 (activation-induced), clone MGC:12289, mRNA, complete cds. /PROD=Similar to C-type (calcium dependent,carbohydrate-recognition domain) lectin, supe…
GNAS	229274_at	0.0280219	0.000348512	-2.40832	-1.26802	2.40832	down	-1.46215	-0.548093	1.46215	down	-4.27947	-2.09743	4.27947	down	-2.30614	-1.20548	2.30614	down	2778	Hs.125898	gb:AI693143 /DB_XREF=gi:4970483 /DB_XREF=wd68a08.x1 /CLONE=IMAGE:2336726 /FEA=EST /CNT=17 /TID=Hs.38057.0 /TIER=Stack /STK=10 /UG=Hs.38057 /UG_TITLE=ESTs
GAPDH	212581_x_at	0.0281215	0.000350265	1.02425	0.0345704	1.02425	up	1.62012	0.6961	1.62012	up	1.42216	0.508086	1.42216	up	1.59093	0.669869	1.59093	up	2597	Hs.544577	gb:BE561479 /DB_XREF=gi:9805199 /DB_XREF=601346543F1 /CLONE=IMAGE:3679498 /FEA=mRNA /CNT=395 /TID=Hs.169476.1 /TIER=Stack /STK=359 /UG=Hs.169476 /LL=2597 /UG_GENE=GAPD /UG_TITLE=glyceraldehyde-3-phosphate dehydrogenase
TAF1D	221580_s_at	0.0284802	0.000355317	1.05129	0.0721579	1.05129	up	-2.60578	-1.38172	2.60578	down	-1.81321	-0.858545	1.81321	down	-1.77374	-0.826794	1.77374	down	79101		gb:BC001972.1 /DB_XREF=gi:12805036 /FEA=FLmRNA /CNT=60 /TID=Hs.301732.1 /TIER=FL+Stack /STK=38 /UG=Hs.301732 /LL=79101 /UG_GENE=MGC5306 /DEF=Homo sapiens, clone MGC:5306, mRNA, complete cds. /PROD=Unknown (protein for MGC:5306) /FL=gb:BC001972.1
CMPK2	226702_at	0.0284802	0.000356022	1.31413	0.394108	1.31413	up	-7.29329	-2.86657	7.29329	down	-8.29817	-3.05279	8.29817	down	-6.2299	-2.63921	6.2299	down	129607	Hs.7155	gb:AI742057 /DB_XREF=gi:5110345 /DB_XREF=wg38d12.x1 /CLONE=IMAGE:2367383 /FEA=EST /CNT=77 /TID=Hs.7155.0 /TIER=Stack /STK=20 /UG=Hs.7155 /UG_TITLE=ESTs, Weakly similar to 2115357A TYKi protein (M.musculus)
MLLT10	1563321_s_at	0.0284802	0.000356296	-1.30069	-0.379274	1.30069	down	-1.18216	-0.241428	1.18216	down	-2.86089	-1.51646	2.86089	down	-2.07109	-1.05039	2.07109	down	8028	Hs.30385	gb:AF272384.1 /DB_XREF=gi:11141536 /TID=Hs2.406233.3 /CNT=2 /FEA=mRNA /TIER=ConsEnd /STK=0 /UG=Hs.406233 /UG_TITLE=Homo sapiens MLLLAF4 fusion protein mRNA, partial cds /DEF=Homo sapiens clone 1568-2 MLLAF-10 fusion protein mRNA, partial cds.
MKLN1	242984_at	0.0285882	0.00035817	-1.01609	-0.0230261	1.01609	down	-1.04361	-0.0615788	1.04361	down	-1.16481	-0.220092	1.16481	down	1.23406	0.30341	1.23406	up	4289	Hs.44693	gb:BF723626 /DB_XREF=gi:12025736 /DB_XREF=EST00062 /CLONE=HSCEST_pp5cd40 /FEA=EST /CNT=5 /TID=Hs.223550.0 /TIER=ConsEnd /STK=0 /UG=Hs.223550 /UG_TITLE=ESTs
	1563186_at	0.0287119	0.000360995	-1.00669	-0.0096197	1.00669	down	1.12632	0.17162	1.12632	up	1.20764	0.272196	1.20764	up	1.03516	0.0498587	1.03516	up		Hs.639261	gb:BC041051.1 /DB_XREF=gi:26996729 /TID=Hs2.434412.1 /CNT=2 /FEA=mRNA /TIER=ConsEnd /STK=0 /UG=Hs.434412 /UG_TITLE=Homo sapiens, clone IMAGE:5425697, mRNA /DEF=Homo sapiens, clone IMAGE:5425697, mRNA.
FUT7	210506_at	0.0287119	0.000361601	1.04776	0.0673131	1.04776	up	1.47353	0.559278	1.47353	up	1.8383	0.878375	1.8383	up	2.76288	1.46618	2.76288	up	2529	Hs.457	gb:U11282.1 /DB_XREF=gi:520524 /FEA=FLmRNA /CNT=9 /TID=Hs.457.0 /TIER=FL /STK=0 /UG=Hs.457 /LL=2529 /UG_GENE=FUT7 /DEF=Human alpha(1,3)fucosyltransferase mRNA, complete cds. /PROD=alpha(1,3)fucosyltransferase /FL=gb:U08112.1 gb:U11282.1 gb:NM_004479.1
PPM1L	239855_at	0.0287119	0.000361911	-1.0092	-0.0132186	1.0092	down	1.39661	0.481927	1.39661	up	1.23676	0.306569	1.23676	up	1.06133	0.0858742	1.06133	up	151742	Hs.389027	gb:AI692675 /DB_XREF=gi:4970015 /DB_XREF=wd86f02.x1 /CLONE=IMAGE:2338491 /FEA=EST /CNT=6 /TID=Hs.202229.0 /TIER=ConsEnd /STK=4 /UG=Hs.202229 /UG_TITLE=ESTs
FMO5	240422_at	0.0287119	0.000362518	1.00877	0.0126022	1.00877	up	1.20417	0.268035	1.20417	up	1.35206	0.435162	1.35206	up	1.3126	0.392424	1.3126	up	2330		gb:AI935710 /DB_XREF=gi:5674580 /DB_XREF=wo99g11.x1 /CLONE=IMAGE:2463524 /FEA=EST /CNT=5 /TID=Hs.116195.0 /TIER=ConsEnd /STK=4 /UG=Hs.116195 /UG_TITLE=ESTs
KCTD15	222664_at	0.0287119	0.000363246	1.11823	0.161215	1.11823	up	1.72286	0.784805	1.72286	up	1.8975	0.924101	1.8975	up	2.0508	1.03619	2.0508	up	79047	Hs.221873	gb:AI808448 /DB_XREF=gi:5395014 /DB_XREF=wf45a04.x1 /CLONE=IMAGE:2358510 /FEA=FLmRNA /CNT=116 /TID=Hs.171637.0 /TIER=Stack /STK=12 /UG=Hs.171637 /LL=79047 /UG_GENE=MGC2628 /UG_TITLE=hypothetical protein MGC2628 /FL=gb:BC001185.1 gb:NM_024076.1
TAOK1	227454_at	0.0287119	0.000363624	1.14632	0.197004	1.14632	up	1.48828	0.573643	1.48828	up	-2.94539	-1.55846	2.94539	down	-1.86863	-0.901983	1.86863	down	57551	Hs.597434	gb:AB037782.1 /DB_XREF=gi:7243102 /GEN=KIAA1361 /FEA=mRNA /CNT=47 /TID=Hs.15119.0 /TIER=Stack /STK=11 /UG=Hs.15119 /LL=57551 /DEF=Homo sapiens mRNA for KIAA1361 protein, partial cds. /PROD=KIAA1361 protein
HSP90AA1	211968_s_at	0.0287119	0.000363905	-1.02945	-0.0418735	1.02945	down	-1.56591	-0.647	1.56591	down	-1.29805	-0.376344	1.29805	down	-1.00973	-0.013972	1.00973	down	3320	Hs.525600	gb:AI962933 /DB_XREF=gi:5755646 /DB_XREF=wt25a07.x1 /CLONE=IMAGE:2508468 /FEA=FLmRNA /CNT=460 /TID=Hs.289088.4 /TIER=Stack /STK=16 /UG=Hs.289088 /LL=3320 /UG_GENE=HSPCA /UG_TITLE=heat shock 90kD protein 1, alpha /FL=gb:NM_005348.1
KCTD18	1553136_at	0.0287119	0.000363966	-1.23382	-0.303137	1.23382	down	-1.00734	-0.0105493	1.00734	down	-1.15442	-0.207167	1.15442	down	-1.32576	-0.406824	1.32576	down	130535	Hs.605775	gb:NM_152387.1 /DB_XREF=gi:22748828 /TID=Hs2.379185.1 /CNT=13 /FEA=FLmRNA /TIER=FL /STK=1 /LL=130535 /UG_GENE=FLJ31322 /UG=Hs.379185 /UG_TITLE=hypothetical protein FLJ31322 /DEF=Homo sapiens hypothetical protein FLJ31322 (FLJ31322), mRNA. /FL=gb:NM_152387.1
CMAS	241065_x_at	0.0287119	0.000364445	-1.10497	-0.144002	1.10497	down	1.23196	0.300957	1.23196	up	-1.0567	-0.0795605	1.0567	down	-1.21351	-0.279185	1.21351	down	55907	Hs.311346	gb:AI076273 /DB_XREF=gi:3405451 /DB_XREF=oy87c10.x1 /CLONE=IMAGE:1672818 /FEA=EST /CNT=4 /TID=Hs.269836.0 /TIER=ConsEnd /STK=4 /UG=Hs.269836 /UG_TITLE=ESTs, Weakly similar to ALU1_HUMAN ALU SUBFAMILY J SEQUENCE CONTAMINATION WARNING ENTRY (H.sapiens)
MICAL2	212472_at	0.0287155	0.000365526	1.33692	0.418914	1.33692	up	2.9555	1.5634	2.9555	up	3.54823	1.8271	3.54823	up	3.15229	1.6564	3.15229	up	9645	Hs.501928	gb:BE965029 /DB_XREF=gi:11768976 /DB_XREF=601658812R1 /CLONE=IMAGE:3886131 /FEA=mRNA /CNT=134 /TID=Hs.198793.0 /TIER=Stack /STK=49 /UG=Hs.198793 /UG_TITLE=Homo sapiens cDNA: FLJ22463 fis, clone HRC10126
RRP12	216360_x_at	0.0287155	0.000365918	-1.10688	-0.146494	1.10688	down	1.27937	0.355435	1.27937	up	1.31387	0.393818	1.31387	up	2.13775	1.09609	2.13775	up	23223	Hs.434251	gb:AK000238.1 /DB_XREF=gi:7020188 /FEA=mRNA /CNT=1 /TID=Hs.60103.1 /TIER=ConsEnd /STK=0 /UG=Hs.60103 /LL=23223 /UG_GENE=KIAA0690 /UG_TITLE=KIAA0690 protein /DEF=Homo sapiens cDNA FLJ20231 fis, clone COLF5511, highly similar to AB014590 Homo sapiens mRNA for KIAA0690 protein.
RSAD2	242625_at	0.0287155	0.000366377	1.72541	0.786936	1.72541	up	-12.9515	-3.69505	12.9515	down	-9.96318	-3.31661	9.96318	down	-13.2095	-3.7235	13.2095	down	91543	Hs.17518	gb:AW189843 /DB_XREF=gi:6464323 /DB_XREF=xl09h05.x1 /CLONE=IMAGE:2675769 /FEA=EST /CNT=6 /TID=Hs.271530.0 /TIER=ConsEnd /STK=3 /UG=Hs.271530 /UG_TITLE=ESTs, Weakly similar to ALU7_HUMAN ALU SUBFAMILY SQ SEQUENCE CONTAMINATION WARNING ENTRY (H.sapiens)
ADPRM	223401_at	0.0287155	0.000366591	-1.25324	-0.325665	1.25324	down	-2.79261	-1.48161	2.79261	down	-2.74091	-1.45465	2.74091	down	-2.18994	-1.13089	2.18994	down	56985		gb:BC001294.1 /DB_XREF=gi:12654898 /FEA=FLmRNA /CNT=50 /TID=Hs.47668.1 /TIER=FL /STK=0 /UG=Hs.47668 /LL=56985 /UG_GENE=MDS006 /DEF=Homo sapiens, Similar to x 006 protein, clone MGC:5294, mRNA, complete cds. /PROD=Similar to x 006 protein /FL=gb:BC001294.1
LARP4B	240005_at	0.02872	0.000367264	-1.0687	-0.0958549	1.0687	down	1.46249	0.548426	1.46249	up	1.3449	0.427502	1.3449	up	1.44433	0.530398	1.44433	up	23185	Hs.159069	gb:AI146467 /DB_XREF=gi:3674149 /DB_XREF=qb93c08.x1 /CLONE=IMAGE:1707662 /FEA=EST /CNT=4 /TID=Hs.159069.0 /TIER=ConsEnd /STK=4 /UG=Hs.159069 /UG_TITLE=ESTs
MAPK1	212271_at	0.02872	0.000368072	1.21856	0.285173	1.21856	up	1.84297	0.882036	1.84297	up	1.50858	0.593191	1.50858	up	2.11713	1.08211	2.11713	up	5594	Hs.431850	gb:AA195999 /DB_XREF=gi:1791623 /DB_XREF=zp99f06.s1 /CLONE=IMAGE:628355 /FEA=mRNA /CNT=199 /TID=Hs.324473.2 /TIER=Stack /STK=44 /UG=Hs.324473 /LL=5594 /UG_GENE=MAPK1 /UG_TITLE=mitogen-activated protein kinase 1
PRUNE	210988_s_at	0.02872	0.000368225	-1.03248	-0.0461103	1.03248	down	1.60125	0.679197	1.60125	up	1.38453	0.4694	1.38453	up	1.80911	0.855282	1.80911	up	58497	Hs.78524	gb:AF123538.1 /DB_XREF=gi:12655789 /FEA=FLmRNA /CNT=2 /TID=Hs.78524.1 /TIER=FL /STK=0 /UG=Hs.78524 /LL=58497 /UG_GENE=HTCD37 /DEF=Homo sapiens clone 17B prune protein mRNA, complete cds., alternatively spliced. /PROD=prune protein /FL=gb:AF123538.1
IFITM1	214022_s_at	0.0288294	0.000370155	1.17543	0.233184	1.17543	up	-2.14031	-1.09782	2.14031	down	-2.13662	-1.09533	2.13662	down	-1.96439	-0.974082	1.96439	down	8519	Hs.458414	gb:AA749101 /DB_XREF=gi:2789059 /DB_XREF=ny11d02.s1 /CLONE=IMAGE:1271427 /FEA=EST /CNT=16 /TID=Hs.146360.1 /TIER=Stack /STK=13 /UG=Hs.146360 /LL=8519 /UG_GENE=IFITM1 /UG_TITLE=interferon induced transmembrane protein 1 (9-27)
FMO5	205776_at	0.0288999	0.000371908	1.29065	0.368101	1.29065	up	1.8844	0.914103	1.8844	up	1.97969	0.985273	1.97969	up	1.97712	0.983402	1.97712	up	2330	Hs.642706	gb:NM_001461.1 /DB_XREF=gi:4503760 /GEN=FMO5 /FEA=FLmRNA /CNT=33 /TID=Hs.14286.0 /TIER=FL+Stack /STK=17 /UG=Hs.14286 /LL=2330 /DEF=Homo sapiens flavin containing monooxygenase 5 (FMO5), mRNA. /PROD=flavin containing monooxygenase 5 /FL=gb:L37080.1 gb:NM_001461.1
ELMO1	204513_s_at	0.0288999	0.000372484	-1.00024	-0.000343263	1.00024	down	1.31206	0.391829	1.31206	up	1.43836	0.524427	1.43836	up	1.87938	0.910254	1.87938	up	9844	Hs.434989	gb:NM_014800.1 /DB_XREF=gi:7662037 /GEN=KIAA0281 /FEA=FLmRNA /CNT=73 /TID=Hs.31463.0 /TIER=FL+Stack /STK=27 /UG=Hs.31463 /LL=9844 /DEF=Homo sapiens KIAA0281 gene product (KIAA0281), mRNA. /PROD=KIAA0281 gene product /FL=gb:BC003051.1 gb:NM_014800.1 gb:D87457.1
WWP2	204022_at	0.0288999	0.000373154	1.41415	0.499937	1.41415	up	1.73835	0.797717	1.73835	up	1.71713	0.779996	1.71713	up	1.68953	0.756618	1.68953	up	11060	Hs.408458	gb:AI668780 /DB_XREF=gi:4833554 /DB_XREF=wc14b09.x1 /CLONE=IMAGE:2315129 /FEA=FLmRNA /CNT=80 /TID=Hs.315493.0 /TIER=Stack /STK=28 /UG=Hs.315493 /LL=11060 /UG_GENE=WWP2 /UG_TITLE=Nedd-4-like ubiquitin-protein ligase /FL=gb:NM_007014.2 gb:U96114.1
SLC4A4	203908_at	0.0288999	0.000373492	1.35764	0.441097	1.35764	up	-1.01245	-0.0178556	1.01245	down	1.14454	0.194768	1.14454	up	-1.17749	-0.235717	1.17749	down	8671	Hs.5462	gb:NM_003759.1 /DB_XREF=gi:4507024 /GEN=SLC4A4 /FEA=FLmRNA /CNT=140 /TID=Hs.5462.0 /TIER=FL+Stack /STK=72 /UG=Hs.5462 /LL=8671 /DEF=Homo sapiens solute carrier family 4, sodium bicarbonate cotransporter, member 4 (SLC4A4), mRNA. /PROD=solute carrier family 4, sodium bicarbonatecotransporter, member 4 /FL=gb:NM_003759.1 gb:AF007216.1
	1562265_at	0.0288999	0.000373703	-1.31508	-0.395147	1.31508	down	2.09366	1.06603	2.09366	up	1.30464	0.383653	1.30464	up	1.04773	0.0672608	1.04773	up		Hs.683987	gb:AL833402.1 /DB_XREF=gi:21734039 /TID=Hs2.378760.1 /CNT=2 /FEA=mRNA /TIER=ConsEnd /STK=0 /UG=Hs.378760 /UG_TITLE=Homo sapiens mRNA; cDNA DKFZp313I1020 (from clone DKFZp313I1020) /DEF=Homo sapiens mRNA; cDNA DKFZp313I1020 (from clone DKFZp313I1020).
SNX20	229045_at	0.0289323	0.000374652	-1.13227	-0.179216	1.13227	down	1.01624	0.0232418	1.01624	up	-1.16506	-0.220405	1.16506	down	2.25953	1.17602	2.25953	up	124460	Hs.715778	gb:AA521424 /DB_XREF=gi:2261967 /DB_XREF=aa69a11.s1 /CLONE=IMAGE:826172 /FEA=EST /CNT=50 /TID=Hs.87280.0 /TIER=Stack /STK=9 /UG=Hs.87280 /UG_TITLE=ESTs
MEF2D	225641_at	0.0290128	0.000376225	1.03254	0.0461916	1.03254	up	-1.64255	-0.715937	1.64255	down	-1.27819	-0.354099	1.27819	down	-1.47198	-0.557762	1.47198	down	4209	Hs.314327	gb:AI829724 /DB_XREF=gi:5450395 /DB_XREF=wf09g01.x1 /CLONE=IMAGE:2350128 /FEA=mRNA /CNT=87 /TID=Hs.77955.0 /TIER=Stack /STK=56 /UG=Hs.77955 /UG_TITLE=Homo sapiens cDNA: FLJ23527 fis, clone LNG05966
ZNF532	220617_s_at	0.0292042	0.000379492	-1.04249	-0.0600309	1.04249	down	1.25656	0.329479	1.25656	up	1.64351	0.716776	1.64351	up	1.57344	0.653924	1.57344	up	55205	Hs.529023	gb:NM_018181.1 /DB_XREF=gi:8922593 /GEN=FLJ10697 /FEA=FLmRNA /CNT=4 /TID=Hs.104557.0 /TIER=FL /STK=0 /UG=Hs.104557 /LL=55205 /DEF=Homo sapiens hypothetical protein FLJ10697 (FLJ10697), mRNA. /PROD=hypothetical protein FLJ10697 /FL=gb:NM_018181.1
APCDD1	225016_at	0.0292042	0.000380435	1.01834	0.026225	1.01834	up	2.82293	1.49719	2.82293	up	4.51208	2.17379	4.51208	up	2.46312	1.30048	2.46312	up	147495	Hs.293274	gb:N48299 /DB_XREF=gi:1189465 /DB_XREF=yy77f10.s1 /CLONE=IMAGE:279595 /FEA=EST /CNT=126 /TID=Hs.20665.0 /TIER=Stack /STK=61 /UG=Hs.20665 /UG_TITLE=ESTs, Moderately similar to NFY-C (H.sapiens)
HEG1	213069_at	0.0292042	0.000381288	1.53246	0.615849	1.53246	up	-2.58385	-1.36952	2.58385	down	-1.43518	-0.521232	1.43518	down	-1.88091	-0.911429	1.88091	down	57493	Hs.477420	gb:AI148659 /DB_XREF=gi:3677128 /DB_XREF=qc69c01.x1 /CLONE=IMAGE:1714848 /FEA=EST /CNT=72 /TID=Hs.296326.0 /TIER=Stack /STK=37 /UG=Hs.296326 /UG_TITLE=ESTs
VSIG10	226485_at	0.0292042	0.00038156	-1.09103	-0.125691	1.09103	down	1.48216	0.567699	1.48216	up	1.04667	0.0658026	1.04667	up	1.0887	0.122608	1.0887	up	54621	Hs.187624	gb:BG547864 /DB_XREF=gi:13546529 /DB_XREF=602576162F1 /CLONE=IMAGE:4704158 /FEA=EST /CNT=59 /TID=Hs.17625.0 /TIER=Stack /STK=11 /UG=Hs.17625 /UG_TITLE=ESTs
ROCK1	235854_x_at	0.0292042	0.000382328	-1.32787	-0.409109	1.32787	down	1.05095	0.0716983	1.05095	up	-1.34818	-0.431008	1.34818	down	-1.00915	-0.013146	1.00915	down	6093	Hs.306307	gb:AA167669 /DB_XREF=gi:1744828 /DB_XREF=zq39c05.r1 /CLONE=IMAGE:632072 /FEA=EST /CNT=10 /TID=Hs.150790.0 /TIER=ConsEnd /STK=0 /UG=Hs.150790 /UG_TITLE=ESTs
RMDN3	218126_at	0.0292042	0.000382618	1.0553	0.0776558	1.0553	up	-1.54454	-0.627173	1.54454	down	-1.03814	-0.0539989	1.03814	down	-1.1522	-0.204388	1.1522	down	55177	Hs.511067	gb:NM_018145.1 /DB_XREF=gi:8922531 /GEN=FLJ10579 /FEA=FLmRNA /CNT=154 /TID=Hs.8055.0 /TIER=FL+Stack /STK=68 /UG=Hs.8055 /LL=55177 /DEF=Homo sapiens hypothetical protein FLJ10579 (FLJ10579), mRNA. /PROD=hypothetical protein FLJ10579 /FL=gb:NM_018145.1
	1570329_at	0.0292042	0.000382652	-1.25278	-0.325137	1.25278	down	-1.03242	-0.0460238	1.03242	down	-1.17956	-0.238248	1.17956	down	-1.46126	-0.547211	1.46126	down		Hs.680772	gb:BC014497.1 /DB_XREF=gi:17939603 /TID=Hs2.352255.1 /CNT=2 /FEA=mRNA /TIER=ConsEnd /STK=0 /UG=Hs.352255 /UG_TITLE=Homo sapiens, clone IMAGE:4853422, mRNA /DEF=Homo sapiens, clone IMAGE:4853422, mRNA.
CHML	206079_at	0.0292042	0.000382979	-1.23979	-0.310098	1.23979	down	-1.05375	-0.0755394	1.05375	down	-1.08807	-0.121772	1.08807	down	-1.19992	-0.262934	1.19992	down	1122	Hs.654545	gb:NM_001821.1 /DB_XREF=gi:4502810 /GEN=CHML /FEA=FLmRNA /CNT=19 /TID=Hs.170129.0 /TIER=FL /STK=0 /UG=Hs.170129 /LL=1122 /DEF=Homo sapiens choroideremia-like (Rab escort protein 2) (CHML), mRNA. /PROD=choroideremia-like Rab escort protein 2 /FL=gb:NM_001821.1
ANKRD44	235778_s_at	0.0292252	0.00038379	-1.17711	-0.235248	1.17711	down	-1.2765	-0.352193	1.2765	down	-2.13674	-1.09541	2.13674	down	-1.72232	-0.784357	1.72232	down	91526	Hs.432706	gb:AI985590 /DB_XREF=gi:5812867 /DB_XREF=ws08h08.x1 /CLONE=IMAGE:2496639 /FEA=EST /CNT=10 /TID=Hs.49690.0 /TIER=ConsEnd /STK=3 /UG=Hs.49690 /UG_TITLE=ESTs, Highly similar to T42691 hypothetical protein DKFZp434D2328.1 (H.sapiens)
LSM12	212529_at	0.0292275	0.000384915	1.11695	0.159569	1.11695	up	1.37452	0.458927	1.37452	up	-1.12566	-0.170775	1.12566	down	2.26605	1.18018	2.26605	up	124801	Hs.355570	gb:BF197707 /DB_XREF=gi:11087054 /DB_XREF=7m96h03.x1 /CLONE=IMAGE:3562997 /FEA=EST /CNT=113 /TID=Hs.155485.3 /TIER=Stack /STK=15 /UG=Hs.155485 /LL=3093 /UG_GENE=HIP2 /UG_TITLE=huntingtin interacting protein 2
EXOC3	212630_at	0.0292275	0.000386411	1.10185	0.13993	1.10185	up	1.62335	0.69897	1.62335	up	1.75706	0.813162	1.75706	up	1.56847	0.649358	1.56847	up	11336	Hs.481464	gb:AF055006.1 /DB_XREF=gi:3005726 /FEA=mRNA /CNT=125 /TID=Hs.8088.0 /TIER=Stack /STK=50 /UG=Hs.8088 /LL=11336 /UG_GENE=SEC6 /DEF=Homo sapiens clone 24666 sec6 homolog mRNA, partial cds. /PROD=sec6 homolog
TMOD4///VPS72	223762_at	0.0292275	0.000386549	-1.32581	-0.406877	1.32581	down	-1.34702	-0.429772	1.34702	down	-1.10757	-0.147397	1.10757	down	-1.13229	-0.179242	1.13229	down	6944///29765	Hs.709681	gb:AF177173.1 /DB_XREF=gi:6934247 /GEN=TMOD4 /FEA=FLmRNA /CNT=43 /TID=Hs.250763.0 /TIER=FL /STK=5 /UG=Hs.250763 /LL=29765 /DEF=Homo sapiens tropomodulin 4 (TMOD4) mRNA, complete cds. /PROD=tropomodulin 4 /FL=gb:NM_013353.1 gb:AF177173.1 gb:AF165217.1
NDUFS8	232169_x_at	0.0292275	0.000386631	-1.39677	-0.482095	1.39677	down	1.02411	0.0343737	1.02411	up	-1.30779	-0.387132	1.30779	down	-2.04739	-1.03378	2.04739	down	4728	Hs.90443	gb:AK002110.1 /DB_XREF=gi:7023791 /FEA=mRNA /CNT=10 /TID=Hs.90443.1 /TIER=ConsEnd /STK=0 /UG=Hs.90443 /LL=4728 /UG_GENE=NDUFS8 /UG_TITLE=NADH dehydrogenase (ubiquinone) Fe-S protein 8 (23kD) (NADH-coenzyme Q reductase) /DEF=Homo sapiens cDNA FLJ11248 fis, clone PLACE1008696, highly similar to Homo sapiens NADH dehydrogenase-ubiquinone Fe-S protein 8 23 kDa subunit gene.
DUSP22	226440_at	0.0292275	0.000386908	1.07647	0.106308	1.07647	up	1.36002	0.443632	1.36002	up	1.61502	0.691553	1.61502	up	1.79397	0.843157	1.79397	up	56940	Hs.29106	gb:BE222746 /DB_XREF=gi:8910064 /DB_XREF=hu52d11.x1 /CLONE=IMAGE:3173685 /FEA=mRNA /CNT=45 /TID=Hs.323092.0 /TIER=Stack /STK=13 /UG=Hs.323092 /UG_TITLE=Homo sapiens cDNA FLJ20376 fis, clone HUV01087
TAF1D	222728_s_at	0.0292275	0.000387027	-1.09793	-0.134791	1.09793	down	-2.84808	-1.50999	2.84808	down	-2.58109	-1.36798	2.58109	down	-2.36627	-1.24262	2.36627	down	79101	Hs.355750	gb:AF275800.1 /DB_XREF=gi:10834764 /FEA=FLmRNA /CNT=65 /TID=Hs.301732.0 /TIER=FL+Stack /STK=8 /UG=Hs.301732 /LL=79101 /UG_GENE=MGC5306 /DEF=Homo sapiens PNAS-104 mRNA, complete cds. /PROD=PNAS-104 /FL=gb:NM_024116.1 gb:AF275800.1
PRKCD	202545_at	0.029283	0.000388298	1.4359	0.521955	1.4359	up	3.79002	1.92221	3.79002	up	3.55374	1.82934	3.55374	up	3.45875	1.79025	3.45875	up	5580	Hs.155342	gb:NM_006254.1 /DB_XREF=gi:5453969 /GEN=PRKCD /FEA=FLmRNA /CNT=127 /TID=Hs.155342.0 /TIER=FL /STK=0 /UG=Hs.155342 /LL=5580 /DEF=Homo sapiens protein kinase C, delta (PRKCD), mRNA. /PROD=protein kinase C, delta /FL=gb:D10495.1 gb:NM_006254.1 gb:L07861.1 gb:L07860.1
	243395_at	0.0293192	0.000389314	-1.44314	-0.529211	1.44314	down	1.91385	0.936478	1.91385	up	1.40259	0.488095	1.40259	up	-1.41935	-0.505226	1.41935	down		Hs.664329	gb:AI679555 /DB_XREF=gi:4889737 /DB_XREF=tu64f01.x1 /CLONE=IMAGE:2255833 /FEA=EST /CNT=5 /TID=Hs.201372.0 /TIER=ConsEnd /STK=2 /UG=Hs.201372 /UG_TITLE=ESTs
CECR6	224393_s_at	0.0294217	0.000391404	1.05738	0.0804966	1.05738	up	2.56598	1.35951	2.56598	up	2.37077	1.24536	2.37077	up	2.4039	1.26538	2.4039	up	27439	Hs.209577	gb:AF307451.1 /DB_XREF=gi:13560309 /GEN=CECR6 /FEA=FLmRNA /CNT=1 /TID=HsAffx.900586.749 /TIER=FL /STK=0 /DEF=Homo sapiens Cat eye syndrome critical region candidate gene number 6 (CECR6) mRNA, complete cds. /PROD=Cat eye syndrome critical region candidate genenumber 6 /FL=gb:AF307451.1
ALPK1	207133_x_at	0.0294217	0.000391751	-1.28075	-0.356988	1.28075	down	1.08915	0.123206	1.08915	up	-1.18518	-0.245108	1.18518	down	-1.69367	-0.760152	1.69367	down	80216	Hs.652825	gb:NM_025144.1 /DB_XREF=gi:13376730 /GEN=FLJ22670 /FEA=FLmRNA /CNT=6 /TID=Hs.288917.0 /TIER=FL /STK=0 /UG=Hs.288917 /LL=80216 /DEF=Homo sapiens hypothetical protein FLJ22670 (FLJ22670), mRNA. /PROD=hypothetical protein FLJ22670 /FL=gb:NM_025144.1
HDAC4	228813_at	0.0295215	0.00039362	1.13834	0.186928	1.13834	up	1.6958	0.76197	1.6958	up	1.76673	0.821081	1.76673	up	2.09495	1.06692	2.09495	up	9759	Hs.20516	gb:AW206037 /DB_XREF=gi:6505511 /DB_XREF=UI-H-BI1-afx-a-02-0-UI.s1 /CLONE=IMAGE:2723211 /FEA=EST /CNT=16 /TID=Hs.91400.1 /TIER=Stack /STK=13 /UG=Hs.91400 /LL=9759 /UG_GENE=HDAC4 /UG_TITLE=histone deacetylase 4
MYL12A	201319_at	0.0295555	0.000394675	1.04588	0.0647172	1.04588	up	-1.24886	-0.320612	1.24886	down	-1.42677	-0.512751	1.42677	down	-1.34457	-0.427148	1.34457	down	10627	Hs.190086	gb:NM_006471.1 /DB_XREF=gi:5453739 /GEN=MLCB /FEA=FLmRNA /CNT=408 /TID=Hs.233936.0 /TIER=FL+Stack /STK=92 /UG=Hs.233936 /LL=10627 /DEF=Homo sapiens myosin, light polypeptide, regulatory, non-sarcomeric (20kD) (MLCB), mRNA. /PROD=myosin, light polypeptide, regulatory,non-sarcomeric (20kD) /FL=gb:NM_006471.1
ACTG1	212363_x_at	0.0295555	0.00039603	-1.01243	-0.0178197	1.01243	down	1.46303	0.548962	1.46303	up	1.35613	0.439493	1.35613	up	1.47595	0.561649	1.47595	up	71	Hs.514581	gb:AU145192 /DB_XREF=gi:11006713 /DB_XREF=AU145192 /CLONE=HEMBA1004153 /FEA=EST /CNT=188 /TID=Hs.14376.7 /TIER=Stack /STK=8 /UG=Hs.14376 /LL=71 /UG_GENE=ACTG1 /UG_TITLE=actin, gamma 1
	234047_at	0.0295555	0.000397473	-1.03072	-0.0436479	1.03072	down	-1.17835	-0.236766	1.17835	down	-1.60796	-0.685235	1.60796	down	-1.50779	-0.592436	1.50779	down		Hs.660822	gb:AK024127.1 /DB_XREF=gi:10436432 /FEA=mRNA /CNT=2 /TID=Hs.287618.0 /TIER=ConsEnd /STK=0 /UG=Hs.287618 /UG_TITLE=Homo sapiens cDNA FLJ14065 fis, clone HEMBB1000917 /DEF=Homo sapiens cDNA FLJ14065 fis, clone HEMBB1000917.
CD47	213857_s_at	0.0295555	0.000397587	1.06577	0.0919001	1.06577	up	-1.45434	-0.540368	1.45434	down	-1.2524	-0.3247	1.2524	down	-1.23902	-0.309196	1.23902	down	961	Hs.446414	gb:BG230614 /DB_XREF=gi:12725656 /DB_XREF=naf41b12.x1 /CLONE=IMAGE:4143335 /FEA=EST /CNT=19 /TID=Hs.82685.1 /TIER=Stack /STK=10 /UG=Hs.82685 /LL=961 /UG_GENE=CD47 /UG_TITLE=CD47 antigen (Rh-related antigen, integrin-associated signal transducer)
KLHL24	206551_x_at	0.0295555	0.000398787	-1.34467	-0.427248	1.34467	down	-1.09177	-0.126664	1.09177	down	-1.42097	-0.506871	1.42097	down	-2.07923	-1.05605	2.07923	down	54800		gb:NM_017644.1 /DB_XREF=gi:8923060 /GEN=FLJ20059 /FEA=FLmRNA /CNT=14 /TID=Hs.246875.0 /TIER=FL /STK=0 /UG=Hs.246875 /LL=54800 /DEF=Homo sapiens hypothetical protein FLJ20059 (FLJ20059), mRNA. /PROD=hypothetical protein FLJ20059 /FL=gb:NM_017644.1
SNRK	209481_at	0.0295555	0.000398958	1.09612	0.132404	1.09612	up	-2.13222	-1.09235	2.13222	down	-1.88075	-0.911308	1.88075	down	-1.74121	-0.800091	1.74121	down	54861	Hs.476052	gb:AF226044.1 /DB_XREF=gi:9295326 /GEN=HSNFRK /FEA=FLmRNA /CNT=125 /TID=Hs.79025.0 /TIER=FL+Stack /STK=67 /UG=Hs.79025 /LL=23182 /DEF=Homo sapiens HSNFRK (HSNFRK) mRNA, complete cds. /PROD=HSNFRK /FL=gb:AF226044.1
PGD	201118_at	0.0295555	0.000399318	1.29188	0.369474	1.29188	up	4.18899	2.0666	4.18899	up	3.15415	1.65725	3.15415	up	5.22954	2.38668	5.22954	up	5226	Hs.464071	gb:NM_002631.1 /DB_XREF=gi:4505758 /GEN=PGD /FEA=FLmRNA /CNT=342 /TID=Hs.75888.0 /TIER=FL /STK=0 /UG=Hs.75888 /LL=5226 /DEF=Homo sapiens phosphogluconate dehydrogenase (PGD), mRNA. /PROD=phosphogluconate dehydrogenase /FL=gb:U30255.1 gb:NM_002631.1 gb:BC000368.1
FUT8-AS1	242889_x_at	0.0295555	0.000399501	-1.13969	-0.188637	1.13969	down	-1.03552	-0.0503576	1.03552	down	-1.28436	-0.361055	1.28436	down	-1.42121	-0.507119	1.42121	down	645431	Hs.713717	gb:AI820076 /DB_XREF=gi:5439166 /DB_XREF=wg56c08.x1 /CLONE=IMAGE:2369102 /FEA=EST /CNT=4 /TID=Hs.143653.0 /TIER=ConsEnd /STK=3 /UG=Hs.143653 /UG_TITLE=ESTs
HACD3	217777_s_at	0.0295555	0.000399841	1.27697	0.352727	1.27697	up	-1.61559	-0.692059	1.61559	down	-1.4278	-0.513789	1.4278	down	1.36174	0.445452	1.36174	up	51495	Hs.512973	gb:NM_016395.1 /DB_XREF=gi:7705458 /GEN=HSPC121 /FEA=FLmRNA /CNT=282 /TID=Hs.260622.0 /TIER=FL /STK=0 /UG=Hs.260622 /LL=51495 /DEF=Homo sapiens butyrate-induced transcript 1 (HSPC121), mRNA. /PROD=butyrate-induced transcript 1 /FL=gb:AF161470.1 gb:NM_016395.1
EPG5	1563471_at	0.0295555	0.000399925	-1.27278	-0.347984	1.27278	down	1.43926	0.525324	1.43926	up	-1.06192	-0.0866758	1.06192	down	-1.26573	-0.339971	1.26573	down	57724	Hs.514843	gb:AL833448.1 /DB_XREF=gi:21734090 /TID=Hs2.378003.1 /CNT=1 /FEA=mRNA /TIER=ConsEnd /STK=0 /UG=Hs.378003 /UG_TITLE=Homo sapiens mRNA; cDNA DKFZp686H07109 (from clone DKFZp686H07109) /DEF=Homo sapiens mRNA; cDNA DKFZp686H07109 (from clone DKFZp686H07109).
SCAMP1	206667_s_at	0.0295555	0.00040038	-1.10481	-0.143797	1.10481	down	1.01647	0.0235715	1.01647	up	-1.54109	-0.623949	1.54109	down	1.56844	0.649332	1.56844	up	9522	Hs.482587	gb:AF005037.1 /DB_XREF=gi:2232238 /GEN=SCAMP1 /FEA=FLmRNA /CNT=10 /TID=Hs.31218.0 /TIER=FL /STK=0 /UG=Hs.31218 /LL=9522 /DEF=Homo sapiens secretory carrier membrane protein (SCAMP1) mRNA, complete cds. /PROD=secretory carrier membrane protein /FL=gb:AF038966.1 gb:AF005037.1 gb:NM_004866.1
MYLK4	1561503_at	0.0295555	0.000400683	1.04339	0.0612765	1.04339	up	1.17673	0.234778	1.17673	up	1.12424	0.168944	1.12424	up	1.21818	0.284729	1.21818	up	340156	Hs.127830	gb:AK096893.1 /DB_XREF=gi:21756485 /TID=Hs2.406994.1 /CNT=2 /FEA=mRNA /TIER=ConsEnd /STK=1 /UG=Hs.406994 /UG_TITLE=Homo sapiens cDNA FLJ39574 fis, clone SKMUS2002693. /DEF=Homo sapiens cDNA FLJ39574 fis, clone SKMUS2002693.
THUMPD1	206555_s_at	0.0295555	0.0004011	1.1961	0.258332	1.1961	up	-1.57893	-0.658948	1.57893	down	-1.84508	-0.883681	1.84508	down	-2.13367	-1.09334	2.13367	down	55623	Hs.700004	gb:NM_017736.1 /DB_XREF=gi:8923246 /GEN=FLJ20274 /FEA=FLmRNA /CNT=13 /TID=Hs.268371.0 /TIER=FL /STK=0 /UG=Hs.268371 /LL=55623 /DEF=Homo sapiens hypothetical protein FLJ20274 (FLJ20274), mRNA. /PROD=hypothetical protein FLJ20274 /FL=gb:BC000448.1 gb:NM_017736.1
UBE2H	217799_x_at	0.0296549	0.000402991	-1.40347	-0.488995	1.40347	down	1.33403	0.41579	1.33403	up	-1.60174	-0.679638	1.60174	down	1.08656	0.119764	1.08656	up	7328	Hs.643548	gb:NM_003344.1 /DB_XREF=gi:4507782 /GEN=UBE2H /FEA=FLmRNA /CNT=352 /TID=Hs.28505.0 /TIER=FL+Stack /STK=16 /UG=Hs.28505 /LL=7328 /DEF=Homo sapiens ubiquitin-conjugating enzyme E2H (homologous to yeast UBC8) (UBE2H), mRNA. /PROD=ubiquitin-conjugating enzyme E2H (homologous toyeast UBC8) /FL=gb:NM_003344.1
LOC728026///PTMA	211921_x_at	0.0299004	0.000406875	-1.23941	-0.309655	1.23941	down	-2.30744	-1.20629	2.30744	down	-1.66417	-0.734802	1.66417	down	-1.69389	-0.760336	1.69389	down	5757///728026	Hs.459927	gb:AF348514.1 /DB_XREF=gi:13560658 /FEA=FLmRNA /CNT=1 /TID=HsAffx.900624.1135 /TIER=FL /STK=0 /DEF=Homo sapiens fetal thymus prothymosin alpha mRNA, complete cds. /PROD=prothymosin alpha /FL=gb:AF348514.1
CYBA	229445_at	0.0299147	0.000407616	-1.0874	-0.120881	1.0874	down	-1.09576	-0.131928	1.09576	down	1.84908	0.886811	1.84908	up	1.65269	0.724816	1.65269	up	1535		gb:AI393352 /DB_XREF=gi:4222899 /DB_XREF=tg44d02.x1 /CLONE=IMAGE:2111619 /FEA=EST /CNT=45 /TID=Hs.174074.0 /TIER=Stack /STK=15 /UG=Hs.174074 /UG_TITLE=ESTs
	243147_x_at	0.0301283	0.000411248	-1.18861	-0.249276	1.18861	down	1.10892	0.149153	1.10892	up	-1.24271	-0.313491	1.24271	down	-1.37677	-0.461289	1.37677	down		Hs.601919	gb:AW118707 /DB_XREF=gi:6087291 /DB_XREF=xd95g01.x1 /CLONE=IMAGE:2605392 /FEA=EST /CNT=3 /TID=Hs.329686.0 /TIER=ConsEnd /STK=3 /UG=Hs.329686 /UG_TITLE=ESTs, Weakly similar to unnamed protein product (H.sapiens)
RETSAT	1566472_s_at	0.0301283	0.000412189	1.11181	0.152912	1.11181	up	1.14814	0.199304	1.14814	up	1.18552	0.245523	1.18552	up	1.91967	0.940861	1.91967	up	54884	Hs.440401	gb:AK098125.1 /DB_XREF=gi:21758071 /TID=Hs2.291580.1 /CNT=1 /FEA=mRNA /TIER=ConsEnd /STK=0 /UG=Hs.291580 /UG_TITLE=Homo sapiens cDNA FLJ40806 fis, clone TRACH2009123. /DEF=Homo sapiens cDNA FLJ40806 fis, clone TRACH2009123.
TBL1XR1	221428_s_at	0.0301283	0.000413547	-1.01863	-0.0266299	1.01863	down	2.32049	1.21443	2.32049	up	3.0653	1.61603	3.0653	up	4.0373	2.01339	4.0373	up	79718	Hs.715026	gb:NM_030921.1 /DB_XREF=gi:13569880 /GEN=DC42 /FEA=FLmRNA /CNT=1 /TID=HsAffx.900115.1082 /TIER=FL /STK=0 /DEF=Homo sapiens hypothetical protein DC42 (DC42), mRNA. /PROD=hypothetical protein DC42 /FL=gb:NM_030921.1
	239589_at	0.0301283	0.000413717	-1.11579	-0.158063	1.11579	down	1.05711	0.0801217	1.05711	up	-1.03683	-0.0521758	1.03683	down	-1.00431	-0.00619943	1.00431	down			gb:N64867 /DB_XREF=gi:1212696 /DB_XREF=za22h10.s1 /CLONE=IMAGE:293347 /FEA=EST /CNT=8 /TID=Hs.37848.0 /TIER=ConsEnd /STK=4 /UG=Hs.37848 /UG_TITLE=ESTs
	AFFX-HUMRGE/M10098_5_at	0.0301283	0.000414479	-1.38171	-0.466454	1.38171	down	-4.29976	-2.10426	4.29976	down	-11.0276	-3.46304	11.0276	down	-17.4799	-4.12763	17.4799	down			H. sapiens /GEN=18S rRNA /DB_XREF=gb:M10098.1 /NOTE=SIF corresponding to nucleotides 115-595 of gb:M10098.1 /DEF=Human 18S rRNA gene, complete.
DUSP3	201536_at	0.0301283	0.000414712	1.1442	0.194338	1.1442	up	2.81421	1.49273	2.81421	up	2.35544	1.236	2.35544	up	1.72025	0.782622	1.72025	up	1845	Hs.181046	gb:AL048503 /DB_XREF=gi:5936534 /DB_XREF=DKFZp586M1524_s1 /CLONE=DKFZp586M1524 /FEA=FLmRNA /CNT=241 /TID=Hs.181046.0 /TIER=Stack /STK=44 /UG=Hs.181046 /LL=1845 /UG_GENE=DUSP3 /UG_TITLE=dual specificity phosphatase 3 (vaccinia virus phosphatase VH1-related) /FL=gb:BC002682.1 gb:NM_004090.1 gb:L05147.1
	234785_at	0.0301283	0.000415266	-1.19094	-0.252096	1.19094	down	-1.85075	-0.888113	1.85075	down	-2.04614	-1.0329	2.04614	down	-3.45681	-1.78944	3.45681	down			gb:AK025047.1 /DB_XREF=gi:10437484 /FEA=mRNA /CNT=1 /TID=Hs.288752.0 /TIER=ConsEnd /STK=0 /UG=Hs.288752 /LL=80193 /UG_GENE=FLJ21394 /UG_TITLE=hypothetical protein FLJ21394 /DEF=Homo sapiens cDNA: FLJ21394 fis, clone COL03536.
REPIN1	222501_s_at	0.0301283	0.00041564	-1.10172	-0.139762	1.10172	down	1.04541	0.0640659	1.04541	up	-1.02346	-0.0334562	1.02346	down	1.7393	0.798505	1.7393	up	29803	Hs.647086	gb:BE674760 /DB_XREF=gi:10035228 /DB_XREF=7e98c08.x1 /CLONE=IMAGE:3293198 /FEA=FLmRNA /CNT=198 /TID=Hs.279944.0 /TIER=Stack /STK=101 /UG=Hs.279944 /LL=29803 /UG_GENE=RIP60 /UG_TITLE=replication initiation region protein (60kD) /FL=gb:NM_013400.1 gb:BC001760.1 gb:AF201303.1
MZT2B	220720_x_at	0.0301283	0.000415902	-1.39421	-0.479443	1.39421	down	-1.026	-0.0370342	1.026	down	-1.33339	-0.415099	1.33339	down	-1.96136	-0.971858	1.96136	down	80097		gb:NM_025029.1 /DB_XREF=gi:13376551 /GEN=FLJ14346 /FEA=FLmRNA /CNT=4 /TID=Hs.287640.0 /TIER=FL /STK=0 /UG=Hs.287640 /LL=80097 /DEF=Homo sapiens hypothetical protein FLJ14346 (FLJ14346), mRNA. /PROD=hypothetical protein FLJ14346 /FL=gb:NM_025029.1
	237914_s_at	0.0301283	0.000416038	1.00256	0.0036834	1.00256	up	-1.18107	-0.24009	1.18107	down	-1.14189	-0.191423	1.14189	down	-1.28865	-0.36586	1.28865	down		Hs.658904	gb:AI693161 /DB_XREF=gi:4970501 /DB_XREF=wd68c04.x1 /CLONE=IMAGE:2336742 /FEA=EST /CNT=5 /TID=Hs.114275.0 /TIER=ConsEnd /STK=5 /UG=Hs.114275 /UG_TITLE=ESTs
DBF4B	206661_at	0.0302987	0.000419242	-1.17298	-0.230181	1.17298	down	1.16794	0.223963	1.16794	up	1.01733	0.0247831	1.01733	up	-1.0192	-0.0274341	1.0192	down	80174		gb:NM_025104.1 /DB_XREF=gi:13376670 /GEN=FLJ13087 /FEA=FLmRNA /CNT=13 /TID=Hs.288623.0 /TIER=FL /STK=0 /UG=Hs.288623 /LL=80174 /DEF=Homo sapiens hypothetical protein FLJ13087 (FLJ13087), mRNA. /PROD=hypothetical protein FLJ13087 /FL=gb:NM_025104.1
SLC35E1	220796_x_at	0.0302987	0.0004195	-1.41743	-0.50328	1.41743	down	1.07356	0.102408	1.07356	up	-1.24802	-0.319646	1.24802	down	-2.20722	-1.14223	2.20722	down	79939	Hs.620596	gb:NM_024881.1 /DB_XREF=gi:13376323 /GEN=FLJ14251 /FEA=FLmRNA /CNT=3 /TID=Hs.214178.0 /TIER=FL /STK=0 /UG=Hs.214178 /LL=79939 /DEF=Homo sapiens hypothetical protein FLJ14251 (FLJ14251), mRNA. /PROD=hypothetical protein FLJ14251 /FL=gb:NM_024881.1
SORBS1	207436_x_at	0.0303003	0.000420075	-1.10501	-0.144054	1.10501	down	1.05077	0.0714474	1.05077	up	-1.16995	-0.226451	1.16995	down	-1.50726	-0.591926	1.50726	down	10580		gb:NM_014896.1 /DB_XREF=gi:7662365 /GEN=KIAA0894 /FEA=FLmRNA /CNT=4 /TID=Hs.199117.0 /TIER=FL /STK=0 /UG=Hs.199117 /LL=22833 /DEF=Homo sapiens KIAA0894 protein (KIAA0894), mRNA. /PROD=KIAA0894 protein /FL=gb:NM_014896.1 gb:AB020701.1
CMBL	234981_x_at	0.0303546	0.000422652	-1.20563	-0.269789	1.20563	down	1.18442	0.244186	1.18442	up	-1.11243	-0.153715	1.11243	down	-1.81672	-0.861337	1.81672	down	134147	Hs.192586	gb:BE537881 /DB_XREF=gi:9766437 /DB_XREF=601067345F1 /CLONE=IMAGE:3453778 /FEA=EST /CNT=36 /TID=Hs.330645.0 /TIER=ConsEnd /STK=0 /UG=Hs.330645 /UG_TITLE=ESTs, Weakly similar to ALU5_HUMAN ALU SUBFAMILY SC SEQUENCE CONTAMINATION WARNING ENTRY (H.sapiens)
	236215_at	0.0303546	0.00042282	-1.03306	-0.0469258	1.03306	down	1.42821	0.514208	1.42821	up	1.09474	0.130592	1.09474	up	1.21911	0.28583	1.21911	up			gb:AI079329 /DB_XREF=gi:3415580 /DB_XREF=oz36h04.x1 /CLONE=IMAGE:1677463 /FEA=EST /CNT=11 /TID=Hs.271876.0 /TIER=ConsEnd /STK=1 /UG=Hs.271876 /UG_TITLE=ESTs, Weakly similar to ALU1_HUMAN ALU SUBFAMILY J SEQUENCE CONTAMINATION WARNING ENTRY (H.sapiens)
GTF2H4	203577_at	0.0303546	0.000422865	1.05711	0.0801274	1.05711	up	-1.60997	-0.687038	1.60997	down	1.15249	0.204749	1.15249	up	1.36544	0.449368	1.36544	up	2968	Hs.485070	gb:NM_001517.1 /DB_XREF=gi:4504200 /GEN=GTF2H4 /FEA=FLmRNA /CNT=117 /TID=Hs.102910.0 /TIER=FL+Stack /STK=37 /UG=Hs.102910 /LL=2968 /DEF=Homo sapiens general transcription factor IIH, polypeptide 4 (52kD subunit) (GTF2H4), mRNA. /PROD=general transcription factor IIH, polypeptide 4(52kD subunit) /FL=gb:NM_001517.1 gb:BC004935.1
ACTR2	1558015_s_at	0.0303546	0.000423049	-1.06796	-0.0948633	1.06796	down	-1.4096	-0.495291	1.4096	down	-1.67466	-0.743869	1.67466	down	2.27738	1.18737	2.27738	up	10097	Hs.744913	gb:BU175810 /DB_XREF=gi:22689794 /DB_XREF=AGENCOURT_7844984 /CLONE=IMAGE:6044327 /TID=Hs2.12755.1 /CNT=23 /FEA=mRNA /TIER=ConsEnd /STK=0 /UG=Hs.12755 /UG_TITLE=Homo sapiens cDNA FLJ31019 fis, clone HLUNG2000362.
DGCR2	202099_s_at	0.0303588	0.000423874	-1.09503	-0.130974	1.09503	down	1.09733	0.134002	1.09733	up	1.11351	0.155114	1.11351	up	1.38158	0.466323	1.38158	up	9993	Hs.517357	gb:H42875 /DB_XREF=gi:918927 /DB_XREF=yo68b01.s1 /CLONE=IMAGE:183049 /FEA=FLmRNA /CNT=186 /TID=Hs.2491.0 /TIER=Stack /STK=16 /UG=Hs.2491 /LL=9993 /UG_GENE=DGCR2 /UG_TITLE=DiGeorge syndrome critical region gene 2 /FL=gb:D79985.1 gb:NM_005137.1
	238193_at	0.0303588	0.000424218	-1.06859	-0.0957092	1.06859	down	2.51702	1.33172	2.51702	up	1.51299	0.597406	1.51299	up	1.01389	0.0199084	1.01389	up		Hs.656632	gb:W87434 /DB_XREF=gi:1401540 /DB_XREF=zh67f03.s1 /CLONE=IMAGE:417149 /FEA=EST /CNT=10 /TID=Hs.106015.0 /TIER=ConsEnd /STK=1 /UG=Hs.106015 /UG_TITLE=ESTs, Moderately similar to ALU1_HUMAN ALU SUBFAMILY J SEQUENCE CONTAMINATION WARNING ENTRY (H.sapiens)
	233776_at	0.0303656	0.000424869	-1.18735	-0.247748	1.18735	down	1.15132	0.203289	1.15132	up	-1.01855	-0.0265228	1.01855	down	-1.16336	-0.218299	1.16336	down		Hs.736015	gb:AU147360 /DB_XREF=gi:11008881 /DB_XREF=AU147360 /CLONE=MAMMA1000453 /FEA=mRNA /CNT=3 /TID=Hs.296705.0 /TIER=ConsEnd /STK=1 /UG=Hs.296705 /UG_TITLE=Homo sapiens cDNA FLJ12212 fis, clone MAMMA1000979
PRR11	232215_x_at	0.0303657	0.000425651	-1.29333	-0.37109	1.29333	down	1.05442	0.0764553	1.05442	up	-1.27337	-0.348651	1.27337	down	-1.91214	-0.935188	1.91214	down	55771	Hs.631750	gb:AK000296.1 /DB_XREF=gi:7020283 /FEA=mRNA /CNT=12 /TID=Hs.274448.2 /TIER=ConsEnd /STK=0 /UG=Hs.274448 /LL=55771 /UG_GENE=FLJ11029 /UG_TITLE=hypothetical protein FLJ11029 /DEF=Homo sapiens cDNA FLJ20289 fis, clone HEP04492.
PSME2	201762_s_at	0.0303657	0.000425981	1.1366	0.184731	1.1366	up	-2.19938	-1.13709	2.19938	down	-1.77642	-0.828971	1.77642	down	-2.04684	-1.0334	2.04684	down	5721	Hs.434081///Hs.512410	gb:NM_002818.1 /DB_XREF=gi:4506236 /GEN=PSME2 /FEA=FLmRNA /CNT=227 /TID=Hs.179774.0 /TIER=FL+Stack /STK=98 /UG=Hs.179774 /LL=5721 /DEF=Homo sapiens proteasome (prosome, macropain) activator subunit 2 (PA28 beta) (PSME2), mRNA. /PROD=proteasome (prosome, macropain) activatorsubunit 2 (PA28 beta) /FL=gb:D45248.1 gb:BC004368.1 gb:NM_002818.1
	222207_x_at	0.0303782	0.000426712	-1.21688	-0.283182	1.21688	down	1.17354	0.230863	1.17354	up	-1.14805	-0.199187	1.14805	down	-1.61612	-0.692536	1.61612	down		Hs.711232	gb:AK024602.1 /DB_XREF=gi:10436915 /FEA=mRNA /CNT=2 /TID=Hs.220255.0 /TIER=ConsEnd /STK=0 /UG=Hs.220255 /UG_TITLE=Homo sapiens cDNA: FLJ20949 fis, clone ADSE01902 /DEF=Homo sapiens cDNA: FLJ20949 fis, clone ADSE01902.
PROSC	209385_s_at	0.0306567	0.000431184	1.19736	0.259852	1.19736	up	1.96414	0.973897	1.96414	up	1.30873	0.388164	1.30873	up	1.58798	0.667192	1.58798	up	11212	Hs.304792	gb:AL136616.1 /DB_XREF=gi:12052757 /GEN=DKFZp564I2423 /FEA=FLmRNA /CNT=92 /TID=Hs.301959.0 /TIER=FL+Stack /STK=8 /UG=Hs.301959 /LL=11212 /DEF=Homo sapiens mRNA; cDNA DKFZp564I2423 (from clone DKFZp564I2423); complete cds. /PROD=hypothetical protein /FL=gb:AL136616.1
TOP3B	215781_s_at	0.0306585	0.000432617	1.11306	0.154526	1.11306	up	1.1701	0.226636	1.1701	up	1.37846	0.463057	1.37846	up	1.74969	0.807097	1.74969	up	8940	Hs.436401	gb:D87012 /DB_XREF=gi:2114263 /FEA=DNA /CNT=3 /TID=Hs.248010.0 /TIER=ConsEnd /STK=0 /UG=Hs.248010 /UG_TITLE=Homo sapiens immunoglobulin lambda gene locus DNA, clone:61D6 /DEF=Homo sapiens immunoglobulin lambda gene locus DNA, clone:61D6
PSME3	209853_s_at	0.0306585	0.000432707	-1.05465	-0.0767636	1.05465	down	1.27143	0.346453	1.27143	up	-1.00895	-0.0128595	1.00895	down	1.70173	0.767004	1.70173	up	10197	Hs.152978	gb:BC002684.1 /DB_XREF=gi:12803696 /FEA=FLmRNA /CNT=41 /TID=Hs.152978.1 /TIER=FL /STK=0 /UG=Hs.152978 /LL=10197 /UG_GENE=PSME3 /DEF=Homo sapiens, proteaseome (prosome, macropain) 28 subunit, 3, clone MGC:3572, mRNA, complete cds. /PROD=proteaseome (prosome, macropain) 28 subunit, 3 /FL=gb:BC002684.1 gb:BC001423.1
	233017_x_at	0.0306585	0.000434001	-1.25188	-0.324095	1.25188	down	1.08951	0.123673	1.08951	up	-1.04533	-0.0639519	1.04533	down	-1.6919	-0.758646	1.6919	down		Hs.660779	gb:AK022388.1 /DB_XREF=gi:10433773 /FEA=mRNA /CNT=4 /TID=Hs.288810.0 /TIER=ConsEnd /STK=0 /UG=Hs.288810 /UG_TITLE=Homo sapiens cDNA FLJ12326 fis, clone MAMMA1002132 /DEF=Homo sapiens cDNA FLJ12326 fis, clone MAMMA1002132.
ANAPC5	208721_s_at	0.0306585	0.000434195	-1.30622	-0.385394	1.30622	down	-1.37602	-0.460496	1.37602	down	-1.55337	-0.635404	1.55337	down	1.22354	0.291059	1.22354	up	51433	Hs.7101	gb:BF967271 /DB_XREF=gi:12334486 /DB_XREF=602287103F1 /CLONE=IMAGE:4374504 /FEA=FLmRNA /CNT=390 /TID=Hs.7101.0 /TIER=Stack /STK=8 /UG=Hs.7101 /LL=51433 /UG_GENE=APC5 /UG_TITLE=anaphase-promoting complex subunit 5 /FL=gb:BC001950.1 gb:AF191339.1 gb:NM_016237.1 gb:BC001081.1
MAGOH	210092_at	0.0306585	0.000434777	1.1041	0.142869	1.1041	up	-1.97767	-0.983802	1.97767	down	-2.59985	-1.37843	2.59985	down	-1.35131	-0.434357	1.35131	down	4116	Hs.421576	gb:AF067173.1 /DB_XREF=gi:4894379 /FEA=FLmRNA /CNT=23 /TID=Hs.57904.0 /TIER=FL /STK=2 /UG=Hs.57904 /LL=4116 /UG_GENE=MAGOH /DEF=Homo sapiens Mago homolog mRNA, complete cds. /PROD=Mago homolog /FL=gb:AF067173.1 gb:AF035940.1 gb:NM_002370.2
HSPB8	233057_at	0.0306585	0.000434934	-1.34421	-0.426759	1.34421	down	1.05388	0.0757066	1.05388	up	-1.01777	-0.0254146	1.01777	down	-1.04439	-0.0626579	1.04439	down	26353		gb:BF109740 /DB_XREF=gi:10939430 /DB_XREF=7l68c08.x1 /CLONE=IMAGE:3526646 /FEA=mRNA /CNT=8 /TID=Hs.205131.0 /TIER=ConsEnd /STK=1 /UG=Hs.205131 /UG_TITLE=Homo sapiens cDNA FLJ10963 fis, clone PLACE1000716
PPIE	229375_at	0.0306585	0.000435135	-1.06465	-0.0903834	1.06465	down	-1.22568	-0.293577	1.22568	down	1.05334	0.0749658	1.05334	up	-1.21355	-0.279232	1.21355	down	10450	Hs.524690	gb:AL526713 /DB_XREF=gi:12790206 /DB_XREF=AL526713 /CLONE=CS0DC020YH17 (5 prime) /FEA=EST /CNT=14 /TID=Hs.22516.0 /TIER=Stack /STK=10 /UG=Hs.22516 /UG_TITLE=ESTs
CD9	201005_at	0.0306903	0.000436147	-1.18462	-0.244419	1.18462	down	2.11125	1.0781	2.11125	up	1.89853	0.924884	1.89853	up	2.78384	1.47708	2.78384	up	928	Hs.114286	gb:NM_001769.1 /DB_XREF=gi:4502692 /GEN=CD9 /FEA=FLmRNA /CNT=342 /TID=Hs.1244.0 /TIER=FL+Stack /STK=126 /UG=Hs.1244 /LL=928 /DEF=Homo sapiens CD9 antigen (p24) (CD9), mRNA. /PROD=CD9 antigen (p24) /FL=gb:NM_001769.1 gb:L34068.1 gb:M38690.1
MRPS30	218398_at	0.0307365	0.000437969	1.15738	0.210863	1.15738	up	-2.39112	-1.25768	2.39112	down	-2.24684	-1.1679	2.24684	down	-1.58111	-0.660939	1.58111	down	10884	Hs.124165	gb:NM_016640.1 /DB_XREF=gi:7706187 /GEN=PDCD9 /FEA=FLmRNA /CNT=85 /TID=Hs.28555.0 /TIER=FL+Stack /STK=33 /UG=Hs.28555 /LL=10884 /DEF=Homo sapiens programmed cell death 9 (PDCD9), mRNA. /PROD=(HSA)PAP protein /FL=gb:AF217523.1 gb:NM_016640.1 gb:BC002460.1 gb:AL136706.1 gb:AF146192.2
NAA15	222836_at	0.0307365	0.000439318	-1.11921	-0.162483	1.11921	down	-1.01875	-0.0268	1.01875	down	1.16214	0.216785	1.16214	up	-1.26272	-0.336537	1.26272	down	80155	Hs.745047	gb:AF327722.1 /DB_XREF=gi:13195459 /FEA=FLmRNA /CNT=40 /TID=Hs.125034.0 /TIER=FL /STK=0 /UG=Hs.125034 /LL=80155 /UG_GENE=FLJ13340 /DEF=Homo sapiens putative acetyltransferase mRNA, complete cds. /PROD=putative acetyltransferase /FL=gb:NM_025085.1 gb:AF327722.1
MOB1A	201299_s_at	0.0307365	0.000439918	1.24131	0.311866	1.24131	up	1.63848	0.712361	1.63848	up	-1.55947	-0.64106	1.55947	down	2.50725	1.32611	2.50725	up	55233	Hs.602092	gb:NM_018221.1 /DB_XREF=gi:8922670 /GEN=FLJ10788 /FEA=FLmRNA /CNT=285 /TID=Hs.196437.0 /TIER=FL+Stack /STK=10 /UG=Hs.196437 /LL=55233 /DEF=Homo sapiens hypothetical protein FLJ10788 (FLJ10788), mRNA. /PROD=hypothetical protein FLJ10788 /FL=gb:AB016839.1 gb:NM_018221.1 gb:BC003398.1
GTPBP2	223789_s_at	0.0307365	0.000440028	1.03346	0.0474863	1.03346	up	1.24903	0.32081	1.24903	up	1.02436	0.034725	1.02436	up	2.15258	1.10607	2.15258	up	54676	Hs.485449	gb:AF116627.1 /DB_XREF=gi:7959755 /FEA=FLmRNA /CNT=8 /TID=Hs.183698.1 /TIER=FL /STK=0 /UG=Hs.183698 /LL=6159 /UG_GENE=RPL29 /DEF=Homo sapiens PRO1181 mRNA, complete cds. /PROD=PRO1181 /FL=gb:AF116627.1
IKZF1	216901_s_at	0.0307365	0.000440093	-1.21142	-0.276694	1.21142	down	-1.091	-0.125657	1.091	down	-1.37694	-0.46146	1.37694	down	2.49914	1.32143	2.49914	up	10320	Hs.488251///Hs.731495	gb:S80876.1 /DB_XREF=gi:1911482 /GEN=IKAROS /FEA=mRNA /CNT=1 /TID=Hs.54452.1 /TIER=ConsEnd /STK=0 /UG=Hs.54452 /LL=10320 /DEF=IKAROS=hIk1 {alternatively spliced} (human, Jurkat T cell line, mRNA Partial, 1788 nt). /PROD=hIk1
P4HB	200656_s_at	0.0307365	0.000440177	1.15896	0.212834	1.15896	up	1.70383	0.768779	1.70383	up	1.72626	0.787651	1.72626	up	2.1634	1.1133	2.1634	up	5034	Hs.464336	gb:NM_000918.1 /DB_XREF=gi:4505566 /GEN=P4HB /FEA=FLmRNA /CNT=484 /TID=Hs.75655.0 /TIER=FL /STK=0 /UG=Hs.75655 /LL=5034 /DEF=Homo sapiens procollagen-proline, 2-oxoglutarate 4-dioxygenase (proline 4-hydroxylase), beta polypeptide (protein disulfide isomerase; thyroid hormone binding protein p55) (P4HB), mRNA. /PROD=procollagen-proline, 2-oxoglutarate4-dioxygenase (proline 4-hydroxylase), beta pol…
IQGAP1	213446_s_at	0.030845	0.000442434	1.0486	0.0684627	1.0486	up	2.24874	1.16912	2.24874	up	-1.34838	-0.431227	1.34838	down	2.58033	1.36755	2.58033	up	8826	Hs.430551	gb:AI679073 /DB_XREF=gi:4889255 /DB_XREF=tu71g05.x1 /CLONE=IMAGE:2256536 /FEA=EST /CNT=39 /TID=Hs.1742.2 /TIER=Stack /STK=9 /UG=Hs.1742 /LL=8826 /UG_GENE=IQGAP1 /UG_TITLE=IQ motif containing GTPase activating protein 1
KCTD15	222668_at	0.030845	0.000443317	-1.07404	-0.103048	1.07404	down	1.85389	0.890555	1.85389	up	2.64308	1.40222	2.64308	up	2.39994	1.263	2.39994	up	79047	Hs.221873	gb:W73820 /DB_XREF=gi:1383973 /DB_XREF=zd52e12.s1 /CLONE=IMAGE:344302 /FEA=FLmRNA /CNT=116 /TID=Hs.171637.0 /TIER=Stack /STK=29 /UG=Hs.171637 /LL=79047 /UG_GENE=MGC2628 /UG_TITLE=hypothetical protein MGC2628 /FL=gb:BC001185.1 gb:NM_024076.1
H2AFV	202487_s_at	0.030845	0.000443424	1.138	0.186498	1.138	up	-1.49329	-0.57849	1.49329	down	-1.35434	-0.43759	1.35434	down	-1.08111	-0.112516	1.08111	down	94239	Hs.488189	gb:NM_012412.1 /DB_XREF=gi:6912615 /GEN=PURB /FEA=FLmRNA /CNT=175 /TID=Hs.301005.0 /TIER=FL+Stack /STK=13 /UG=Hs.301005 /LL=5814 /DEF=Homo sapiens purine-rich element binding protein B (PURB), mRNA. /PROD=purine-rich element binding protein B /FL=gb:NM_012412.1 gb:BC000098.1 gb:AF081192.1 gb:BC004274.1
	1557519_at	0.0308454	0.000444084	-1.32117	-0.401818	1.32117	down	-1.14626	-0.196933	1.14626	down	-1.25703	-0.330015	1.25703	down	-1.1475	-0.198492	1.1475	down		Hs.621497	gb:AF075106.1 /DB_XREF=gi:3377647 /TID=Hs2.384698.1 /CNT=4 /FEA=mRNA /TIER=ConsEnd /STK=1 /UG=Hs.384698 /UG_TITLE=Homo sapiens full length insert cDNA YU10E03 /DEF=Homo sapiens full length insert cDNA YU10E03.
	236946_at	0.0308454	0.000444985	-1.38734	-0.472322	1.38734	down	1.17639	0.23437	1.17639	up	-1.31443	-0.394434	1.31443	down	-1.28692	-0.363922	1.28692	down			gb:AI220134 /DB_XREF=gi:3802337 /DB_XREF=qi44g03.x1 /CLONE=IMAGE:1859380 /FEA=EST /CNT=6 /TID=Hs.21691.0 /TIER=ConsEnd /STK=5 /UG=Hs.21691 /UG_TITLE=ESTs
RSF1	222540_s_at	0.0308454	0.000445398	-1.047	-0.0662561	1.047	down	-1.63879	-0.712635	1.63879	down	-2.29212	-1.19669	2.29212	down	-1.98142	-0.986536	1.98142	down	51773	Hs.420229	gb:BG286920 /DB_XREF=gi:13040220 /DB_XREF=602382785F1 /CLONE=IMAGE:4500212 /FEA=FLmRNA /CNT=147 /TID=Hs.20509.0 /TIER=Stack /STK=12 /UG=Hs.20509 /LL=51773 /UG_GENE=LOC51773 /UG_TITLE=HBV pX associated protein-8 /FL=gb:AF227948.2 gb:NM_016578.2
RABEP1	231002_s_at	0.0308454	0.000446053	1.065	0.0908476	1.065	up	-1.58099	-0.660826	1.58099	down	-1.45383	-0.53986	1.45383	down	-1.71213	-0.775791	1.71213	down	9135	Hs.592121	gb:AA778438 /DB_XREF=gi:2837769 /DB_XREF=zf39g12.s1 /CLONE=IMAGE:379366 /FEA=EST /CNT=10 /TID=Hs.172108.3 /TIER=Stack /STK=9 /UG=Hs.172108 /LL=4927 /UG_GENE=NUP88 /UG_TITLE=nucleoporin 88kD
MICAL2	236475_at	0.0308454	0.00044625	1.01039	0.0149153	1.01039	up	2.00968	1.00697	2.00968	up	1.62049	0.69643	1.62049	up	1.2324	0.301469	1.2324	up	9645	Hs.501928	gb:W86183 /DB_XREF=gi:1398623 /DB_XREF=zh58h01.s1 /CLONE=IMAGE:416305 /FEA=EST /CNT=6 /TID=Hs.6927.0 /TIER=ConsEnd /STK=6 /UG=Hs.6927 /UG_TITLE=ESTs
PROS1	207808_s_at	0.0308478	0.000447152	-1.13073	-0.177258	1.13073	down	3.82151	1.93414	3.82151	up	2.46321	1.30054	2.46321	up	5.06527	2.34064	5.06527	up	5627	Hs.64016	gb:NM_000313.1 /DB_XREF=gi:4506116 /GEN=PROS1 /FEA=FLmRNA /CNT=3 /TID=Hs.64016.0 /TIER=FL /STK=0 /UG=Hs.64016 /LL=5627 /DEF=Homo sapiens protein S (alpha) (PROS1), mRNA. /PROD=protein S (alpha) /FL=gb:M15036.1 gb:NM_000313.1
PODNL1	220411_x_at	0.0308478	0.000447414	-1.17321	-0.230467	1.17321	down	1.19549	0.257602	1.19549	up	1.0287	0.0408172	1.0287	up	-1.22671	-0.29479	1.22671	down	79883	Hs.448497	gb:NM_024825.1 /DB_XREF=gi:13376223 /GEN=FLJ23447 /FEA=FLmRNA /CNT=7 /TID=Hs.175024.0 /TIER=FL /STK=0 /UG=Hs.175024 /LL=79883 /DEF=Homo sapiens hypothetical protein FLJ23447 (FLJ23447), mRNA. /PROD=hypothetical protein FLJ23447 /FL=gb:NM_024825.1
CTNNBL1	221021_s_at	0.0308515	0.000448915	1.14598	0.196582	1.14598	up	-1.28616	-0.363067	1.28616	down	-1.03266	-0.0463654	1.03266	down	-1.21387	-0.279611	1.21387	down	56259	Hs.472667	gb:NM_030877.1 /DB_XREF=gi:13549248 /GEN=P14L /FEA=FLmRNA /CNT=1 /TID=HsAffx.900089.148 /TIER=FL /STK=0 /DEF=Homo sapiens similar to Bos taurus P14 protein (P14L), mRNA. /PROD=similar to Bos taurus P14 protein /FL=gb:NM_030877.1
	237868_x_at	0.0308515	0.000449847	-1.265	-0.339139	1.265	down	1.07217	0.100536	1.07217	up	-1.22945	-0.298017	1.22945	down	-1.80938	-0.855494	1.80938	down		Hs.661380	gb:AI791828 /DB_XREF=gi:5339470 /DB_XREF=nc45b05.y5 /CLONE=IMAGE:1011057 /FEA=EST /CNT=9 /TID=Hs.172603.0 /TIER=ConsEnd /STK=0 /UG=Hs.172603 /UG_TITLE=ESTs, Weakly similar to ALUF_HUMAN !!!! ALU CLASS F WARNING ENTRY !!! (H.sapiens)
CLINT1	201768_s_at	0.0308515	0.000449977	-1.05576	-0.0782885	1.05576	down	1.26085	0.334393	1.26085	up	1.20244	0.265961	1.20244	up	1.40028	0.485715	1.40028	up	9685	Hs.644000	gb:BC004467.1 /DB_XREF=gi:13325306 /FEA=FLmRNA /CNT=218 /TID=Hs.155623.0 /TIER=FL+Stack /STK=11 /UG=Hs.155623 /LL=9685 /UG_GENE=KIAA0171 /DEF=Homo sapiens, KIAA0171 gene product, clone MGC:10257, mRNA, complete cds. /PROD=KIAA0171 gene product /FL=gb:NM_014666.1 gb:D79993.1 gb:BC004467.1
SBDS///SBDSP1	222669_s_at	0.0308515	0.000450572	1.0469	0.0661198	1.0469	up	-2.99232	-1.58126	2.99232	down	-1.82967	-0.871583	1.82967	down	-2.42732	-1.27937	2.42732	down	51119///155370	Hs.110445///Hs.585053	gb:AK001779.1 /DB_XREF=gi:7023263 /FEA=FLmRNA /CNT=81 /TID=Hs.110445.0 /TIER=Stack /STK=11 /UG=Hs.110445 /LL=51119 /UG_GENE=LOC51119 /UG_TITLE=CGI-97 protein /DEF=Homo sapiens cDNA FLJ10917 fis, clone OVARC1000321. /FL=gb:NM_016038.1 gb:AF151855.1
TBC1D1	227945_at	0.0308515	0.000451683	1.07286	0.101466	1.07286	up	1.5074	0.592064	1.5074	up	1.81424	0.859366	1.81424	up	1.63053	0.705342	1.63053	up	23216	Hs.176503	gb:BE882538 /DB_XREF=gi:10331314 /DB_XREF=601507281F1 /CLONE=IMAGE:3908661 /FEA=EST /CNT=36 /TID=Hs.27356.0 /TIER=Stack /STK=32 /UG=Hs.27356 /UG_TITLE=ESTs
DYNC1H1	229115_at	0.0308515	0.000451694	1.09283	0.128066	1.09283	up	-1.07061	-0.0984265	1.07061	down	-2.89417	-1.53315	2.89417	down	-2.37972	-1.25079	2.37972	down	1778	Hs.614080	gb:BF000332 /DB_XREF=gi:10700607 /DB_XREF=7h26c02.x1 /CLONE=IMAGE:3317090 /FEA=EST /CNT=15 /TID=Hs.7720.0 /TIER=Stack /STK=8 /UG=Hs.7720 /LL=1778 /UG_GENE=DNCH1 /UG_TITLE=dynein, cytoplasmic, heavy polypeptide 1
DHX34	204815_s_at	0.0308515	0.000451745	-1.03717	-0.0526488	1.03717	down	1.15677	0.210097	1.15677	up	-1.08683	-0.120132	1.08683	down	1.43506	0.521111	1.43506	up	9704	Hs.151706	gb:AI924903 /DB_XREF=gi:5660867 /DB_XREF=wn25e04.x1 /CLONE=IMAGE:2446494 /FEA=FLmRNA /CNT=59 /TID=Hs.151706.0 /TIER=Stack /STK=20 /UG=Hs.151706 /LL=9704 /UG_GENE=KIAA0134 /UG_TITLE=KIAA0134 gene product /FL=gb:D50924.1 gb:NM_014681.1
	242398_x_at	0.0308515	0.000452271	-1.34797	-0.430792	1.34797	down	1.21089	0.276067	1.21089	up	-1.24929	-0.321104	1.24929	down	-1.55815	-0.639837	1.55815	down		Hs.665609	gb:AA605121 /DB_XREF=gi:2444940 /DB_XREF=no71b11.s1 /CLONE=IMAGE:1112253 /FEA=EST /CNT=3 /TID=Hs.298174.0 /TIER=ConsEnd /STK=3 /UG=Hs.298174 /UG_TITLE=ESTs, Weakly similar to ALU1_HUMAN ALU SUBFAMILY J SEQUENCE CONTAMINATION WARNING ENTRY (H.sapiens)
SMAD7	204790_at	0.0308515	0.000452546	-1.17588	-0.233742	1.17588	down	-4.5534	-2.18694	4.5534	down	-2.65854	-1.41064	2.65854	down	-2.52731	-1.3376	2.52731	down	4092	Hs.465087	gb:NM_005904.1 /DB_XREF=gi:5174516 /GEN=MADH7 /FEA=FLmRNA /CNT=47 /TID=Hs.100602.0 /TIER=FL+Stack /STK=12 /UG=Hs.100602 /LL=4092 /DEF=Homo sapiens MAD (mothers against decapentaplegic, Drosophila) homolog 7 (MADH7), mRNA. /PROD=MAD (mothers against decapentaplegic,Drosophila) homolog 7 /FL=gb:AF015261.1 gb:AF010193.1 gb:NM_005904.1
CDK19	212897_at	0.030899	0.000454483	1.12034	0.163937	1.12034	up	2.00067	1.00048	2.00067	up	1.34478	0.427374	1.34478	up	1.19886	0.261663	1.19886	up	23097	Hs.744895	gb:AI738802 /DB_XREF=gi:5100783 /DB_XREF=wi36g07.x1 /CLONE=IMAGE:2392380 /FEA=mRNA /CNT=119 /TID=Hs.129836.0 /TIER=Stack /STK=20 /UG=Hs.129836 /LL=23097 /UG_GENE=KIAA1028 /UG_TITLE=KIAA1028 protein
SGMS2	243141_at	0.030899	0.000454678	1.11543	0.157605	1.11543	up	1.22785	0.29614	1.22785	up	1.18552	0.245517	1.18552	up	1.78775	0.838144	1.78775	up	166929	Hs.595423	gb:D31421 /DB_XREF=gi:644301 /DB_XREF=HUML13764 /FEA=EST /CNT=5 /TID=Hs.62666.0 /TIER=ConsEnd /STK=0 /UG=Hs.62666 /UG_TITLE=ESTs
CSNK2A1	206075_s_at	0.030899	0.000454937	1.00144	0.00206999	1.00144	up	1.10943	0.149814	1.10943	up	1.00708	0.0101852	1.00708	up	1.51389	0.598258	1.51389	up	1457	Hs.644056	gb:NM_001895.1 /DB_XREF=gi:4503094 /GEN=CSNK2A1 /FEA=FLmRNA /CNT=20 /TID=Hs.155140.0 /TIER=FL /STK=0 /UG=Hs.155140 /LL=1457 /DEF=Homo sapiens casein kinase 2, alpha 1 polypeptide (CSNK2A1), mRNA. /PROD=casein kinase 2, alpha 1 polypeptide /FL=gb:NM_001895.1 gb:J02853.1 gb:M55265.1
TKT	208700_s_at	0.0309107	0.000456752	1.00229	0.00329494	1.00229	up	2.59959	1.37828	2.59959	up	2.43777	1.28556	2.43777	up	2.84244	1.50713	2.84244	up	7086	Hs.89643	gb:L12711.1 /DB_XREF=gi:388890 /GEN=tk /FEA=FLmRNA /CNT=462 /TID=Hs.89643.0 /TIER=FL+Stack /STK=126 /UG=Hs.89643 /LL=7086 /DEF=Homo sapiens transketolase (tk) mRNA, complete cds. /PROD=transketolase /FL=gb:NM_001064.1 gb:L12711.1 gb:U55017.1
IL17RA	229101_at	0.0309107	0.000457231	1.39604	0.481343	1.39604	up	2.54918	1.35004	2.54918	up	2.23229	1.15853	2.23229	up	2.54137	1.34561	2.54137	up	23765	Hs.48353	gb:AI963142 /DB_XREF=gi:5755855 /DB_XREF=wt27h03.x1 /CLONE=IMAGE:2508725 /FEA=EST /CNT=13 /TID=Hs.177376.0 /TIER=Stack /STK=9 /UG=Hs.177376 /UG_TITLE=ESTs
TPCN1	217914_at	0.0309107	0.000457307	1.03263	0.046317	1.03263	up	1.19335	0.255016	1.19335	up	1.89322	0.920838	1.89322	up	1.43479	0.520839	1.43479	up	53373	Hs.524763	gb:NM_017901.1 /DB_XREF=gi:8923566 /GEN=KIAA1169 /FEA=FLmRNA /CNT=187 /TID=Hs.26440.0 /TIER=FL /STK=0 /UG=Hs.26440 /LL=53373 /DEF=Homo sapiens two-pore channel 1, homolog (KIAA1169), mRNA. /PROD=two-pore channel 1, homolog /FL=gb:NM_017901.1
SLC11A2	203125_x_at	0.0309107	0.000457372	-1.04501	-0.0635219	1.04501	down	1.45244	0.538476	1.45244	up	1.18216	0.241427	1.18216	up	1.25131	0.323441	1.25131	up	4891	Hs.505545	gb:AF046997.1 /DB_XREF=gi:3170363 /FEA=FLmRNA /CNT=153 /TID=Hs.57435.0 /TIER=FL /STK=0 /UG=Hs.57435 /LL=4891 /UG_GENE=SLC11A2 /DEF=Homo sapiens NRAMP2 iron transporter mRNA, complete cds. /PROD=NRAMP2 iron transporter /FL=gb:AF046997.1 gb:AB004857.1 gb:BC002592.1 gb:NM_000617.1
FRMD8	210043_at	0.0310683	0.000460271	-1.11414	-0.155931	1.11414	down	1.31457	0.394588	1.31457	up	1.3331	0.414783	1.3331	up	1.37342	0.457772	1.37342	up	83786	Hs.578433	gb:AF334946.1 /DB_XREF=gi:12276205 /GEN=FKSG44 /FEA=FLmRNA /CNT=21 /TID=Hs.293476.0 /TIER=FL /STK=0 /UG=Hs.293476 /DEF=Homo sapiens FKSG44 (FKSG44) mRNA, complete cds. /PROD=FKSG44 /FL=gb:AF334946.1
ARHGAP26	215955_x_at	0.0312228	0.000463765	1.19581	0.257991	1.19581	up	1.68748	0.754873	1.68748	up	1.51186	0.596321	1.51186	up	2.07116	1.05044	2.07116	up	23092	Hs.654668	gb:Y10388 /DB_XREF=gi:7340768 /FEA=DNA /CNT=2 /TID=Hs.132942.1 /TIER=ConsEnd /STK=0 /UG=Hs.132942 /LL=23092 /UG_GENE=KIAA0621 /UG_TITLE=GTPase regulator associated with the focal adhesion kinase pp125(FAK); KIAA0621 protein /DEF=H.sapiens graf gene
SNHG6	225547_at	0.0312228	0.000463948	1.06907	0.0963546	1.06907	up	-1.99553	-0.996774	1.99553	down	-1.62109	-0.696962	1.62109	down	-1.62976	-0.704658	1.62976	down	641638	Hs.372680	gb:BG169443 /DB_XREF=gi:12676146 /DB_XREF=602321129F1 /CLONE=IMAGE:4424526 /FEA=EST /CNT=82 /TID=Hs.292815.0 /TIER=Stack /STK=29 /UG=Hs.292815 /UG_TITLE=ESTs
	233607_at	0.0312228	0.000464274	1.12662	0.172001	1.12662	up	1.28692	0.363921	1.28692	up	1.33994	0.422171	1.33994	up	1.17355	0.230882	1.17355	up		Hs.677063	gb:AU145679 /DB_XREF=gi:11007200 /DB_XREF=AU145679 /CLONE=HEMBA1005497 /FEA=mRNA /CNT=3 /TID=Hs.301626.0 /TIER=ConsEnd /STK=1 /UG=Hs.301626 /UG_TITLE=Homo sapiens cDNA FLJ11739 fis, clone HEMBA1005497
SRSF9	201698_s_at	0.0312507	0.000465699	1.02317	0.0330405	1.02317	up	1.35317	0.436347	1.35317	up	1.42956	0.515575	1.42956	up	2.01933	1.01387	2.01933	up	8683	Hs.744094	gb:NM_003769.1 /DB_XREF=gi:4506902 /GEN=SFRS9 /FEA=FLmRNA /CNT=200 /TID=Hs.77608.0 /TIER=FL /STK=6 /UG=Hs.77608 /LL=8683 /DEF=Homo sapiens splicing factor, arginineserine-rich 9 (SFRS9), mRNA. /PROD=splicing factor, arginineserine-rich 9 /FL=gb:U30825.1 gb:NM_003769.1
CHTF8	224732_at	0.0312507	0.000465831	1.05812	0.0814984	1.05812	up	1.27486	0.350335	1.27486	up	1.47904	0.564662	1.47904	up	1.66	0.731183	1.66	up	54921	Hs.85962	gb:AI309784 /DB_XREF=gi:4004655 /DB_XREF=qo75c11.x1 /CLONE=IMAGE:1914356 /FEA=EST /CNT=150 /TID=Hs.5566.5 /TIER=Stack /STK=54 /UG=Hs.5566 /LL=6168 /UG_GENE=RPL37A /UG_TITLE=ribosomal protein L37a
DLST	215210_s_at	0.0313272	0.000467545	-1.03511	-0.0497862	1.03511	down	-1.754	-0.810649	1.754	down	1.07325	0.101989	1.07325	up	-1.14616	-0.196812	1.14616	down	1743	Hs.525459	gb:S72422.1 /DB_XREF=gi:632883 /GEN=E2k /FEA=mRNA /CNT=5 /TID=Hs.296348.0 /TIER=ConsEnd /STK=0 /UG=Hs.296348 /DEF=E2k=alpha-ketoglutarate dehydrogenase complex dihydrolipoyl succinyltransferase (human, fetal brain, mRNA, 2987 nt). /PROD=alpha-ketoglutarate dehydrogenase complexdihydrolipoyl succinyltransferase
ACP5	204638_at	0.0315323	0.00047192	1.1343	0.181797	1.1343	up	-2.03668	-1.02622	2.03668	down	1.06965	0.0971393	1.06965	up	1.08447	0.116994	1.08447	up	54	Hs.1211	gb:NM_001611.2 /DB_XREF=gi:6138970 /GEN=ACP5 /FEA=FLmRNA /CNT=61 /TID=Hs.1211.0 /TIER=FL+Stack /STK=26 /UG=Hs.1211 /LL=54 /DEF=Homo sapiens acid phosphatase 5, tartrate resistant (ACP5), mRNA. /PROD=tartrate resistant acid phosphatase 5 precursor /FL=gb:J04430.1 gb:NM_001611.2
GAPDH	213453_x_at	0.0315323	0.000472547	1.00571	0.00821441	1.00571	up	1.62435	0.699861	1.62435	up	1.40331	0.488834	1.40331	up	1.60519	0.682746	1.60519	up	2597	Hs.544577	gb:BF689355 /DB_XREF=gi:11974763 /DB_XREF=602184994T1 /CLONE=IMAGE:4299431 /FEA=EST /CNT=35 /TID=Hs.169476.4 /TIER=Stack /STK=8 /UG=Hs.169476 /LL=2597 /UG_GENE=GAPD /UG_TITLE=glyceraldehyde-3-phosphate dehydrogenase
TRAPPC2///TRAPPC2B	209751_s_at	0.0315323	0.000472581	1.06261	0.0876175	1.06261	up	-2.8772	-1.52467	2.8772	down	-2.27086	-1.18324	2.27086	down	-1.50941	-0.593982	1.50941	down	6399///10597	Hs.446620///Hs.592238	gb:AF291676.1 /DB_XREF=gi:9937492 /FEA=FLmRNA /CNT=67 /TID=Hs.5699.0 /TIER=FL+Stack /STK=17 /UG=Hs.5699 /LL=10597 /UG_GENE=SEDLP /DEF=Homo sapiens MBP-1 interacting protein-2A mRNA, complete cds. /PROD=MBP-1 interacting protein-2A /FL=gb:NM_015890.1 gb:AF291676.1
	237133_at	0.0315323	0.000472912	-1.00542	-0.00779719	1.00542	down	1.75232	0.809266	1.75232	up	1.05357	0.0752808	1.05357	up	-1.03376	-0.0479038	1.03376	down		Hs.663335	gb:AW974815 /DB_XREF=gi:8166018 /DB_XREF=EST386920 /FEA=EST /CNT=10 /TID=Hs.292786.0 /TIER=ConsEnd /STK=0 /UG=Hs.292786 /UG_TITLE=ESTs
	221120_at	0.0315547	0.000474082	-1.23958	-0.309851	1.23958	down	-1.15369	-0.206254	1.15369	down	-1.33753	-0.419566	1.33753	down	-1.41709	-0.502927	1.41709	down			gb:NM_017756.1 /DB_XREF=gi:8923286 /GEN=FLJ20306 /FEA=FLmRNA /CNT=2 /TID=Hs.272791.0 /TIER=FL /STK=0 /UG=Hs.272791 /LL=54889 /DEF=Homo sapiens hypothetical protein FLJ20306 (FLJ20306), mRNA. /PROD=hypothetical protein FLJ20306 /FL=gb:NM_017756.1
SCML2	206147_x_at	0.0315547	0.000474403	-1.12012	-0.16365	1.12012	down	-1.57652	-0.656747	1.57652	down	-1.51697	-0.601194	1.51697	down	-1.18236	-0.241672	1.18236	down	10389	Hs.495774	gb:NM_006089.1 /DB_XREF=gi:5174668 /GEN=SCML2 /FEA=FLmRNA /CNT=22 /TID=Hs.171558.0 /TIER=FL /STK=6 /UG=Hs.171558 /LL=10389 /DEF=Homo sapiens sex comb on midleg (Drosophila)-like 2 (SCML2), mRNA. /PROD=sex comb on midleg (Drosophila)-like 2 /FL=gb:NM_006089.1
NUCKS1	229353_s_at	0.0315721	0.000475242	-1.06756	-0.0943117	1.06756	down	-2.519	-1.33285	2.519	down	-2.07073	-1.05014	2.07073	down	-2.35272	-1.23433	2.35272	down	64710	Hs.744865	gb:AW515443 /DB_XREF=gi:7153525 /DB_XREF=xu70e08.x1 /CLONE=IMAGE:2807078 /FEA=EST /CNT=35 /TID=Hs.118064.2 /TIER=Stack /STK=11 /UG=Hs.118064 /LL=64710 /UG_GENE=NUCKS /UG_TITLE=similar to rat nuclear ubiquitous casein kinase 2
KCNAB2	211791_s_at	0.0315839	0.000475996	-1.00784	-0.0112645	1.00784	down	1.05212	0.0732998	1.05212	up	1.00085	0.00123052	1.00085	up	1.69282	0.759426	1.69282	up	8514	Hs.440497	gb:AF044253.1 /DB_XREF=gi:2827465 /GEN=HKvbeta2.2 /FEA=FLmRNA /CNT=12 /TID=Hs.298184.1 /TIER=FL /STK=0 /UG=Hs.298184 /LL=8514 /DEF=Homo sapiens potassium channel beta 2 subunit (HKvbeta2.2) mRNA, alternatively spliced, complete cds. /PROD=potassium channel beta 2 subunit /FL=gb:AF044253.1
PPP2R5C	213305_s_at	0.031659	0.000477707	1.30257	0.381364	1.30257	up	-1.72897	-0.789916	1.72897	down	-1.51484	-0.599166	1.51484	down	-1.5279	-0.611553	1.5279	down	5527	Hs.368264	gb:L42375.1 /DB_XREF=gi:1000891 /GEN=PP2A /FEA=mRNA /CNT=51 /TID=Hs.171734.2 /TIER=Stack /STK=35 /UG=Hs.171734 /LL=5527 /DEF=Homo sapiens protein phosphatase 2A B56-gamma1 (PP2A) mRNA, 3 end of cds. /PROD=protein phosphatase 2A B56-gamma1
MRVI1	230214_at	0.0316875	0.000478718	1.57986	0.659794	1.57986	up	3.39301	1.76257	3.39301	up	1.81067	0.856521	1.81067	up	1.87157	0.904251	1.87157	up	10335	Hs.501898	gb:AL044056 /DB_XREF=gi:5432284 /DB_XREF=DKFZp434K0528_s1 /CLONE=DKFZp434K0528 /FEA=EST /CNT=11 /TID=Hs.158047.0 /TIER=Stack /STK=9 /UG=Hs.158047 /UG_TITLE=ESTs
ARNT	210828_s_at	0.0316977	0.00047988	-1.08744	-0.120941	1.08744	down	1.16454	0.219762	1.16454	up	-1.1155	-0.157695	1.1155	down	1.32907	0.410422	1.32907	up	405	Hs.632446	gb:AF001307.1 /DB_XREF=gi:2702318 /GEN=ARNT /FEA=FLmRNA /CNT=2 /TID=Hs.166172.1 /TIER=FL /STK=0 /UG=Hs.166172 /LL=405 /DEF=Homo sapiens aryl hydrocarbon receptor nuclear translocator (ARNT) mRNA, splice variant, complete cds. /PROD=aryl hydrocarbon receptor nuclear translocator /FL=gb:AF001307.1
PCSK6	211262_at	0.0316977	0.00048003	1.06551	0.0915408	1.06551	up	1.49595	0.581058	1.49595	up	1.18189	0.241098	1.18189	up	1.59156	0.670445	1.59156	up	5046	Hs.498494	gb:D28513.1 /DB_XREF=gi:666010 /FEA=FLmRNA /CNT=1 /TID=Hs.170414.1 /TIER=FL /STK=0 /UG=Hs.170414 /LL=5046 /UG_GENE=PACE4 /DEF=Human mRNA for PACE4C (kexin-like protease), complete cds. /PROD=PACE4C /FL=gb:D28513.1
RER1	202296_s_at	0.0317194	0.00048094	1.1748	0.232415	1.1748	up	1.27446	0.349888	1.27446	up	1.22913	0.297634	1.22913	up	1.65537	0.727155	1.65537	up	11079	Hs.525527	gb:NM_007033.1 /DB_XREF=gi:5902045 /GEN=RER1 /FEA=FLmRNA /CNT=160 /TID=Hs.40500.0 /TIER=FL /STK=0 /UG=Hs.40500 /LL=11079 /DEF=Homo sapiens similar to S. cerevisiae RER1 (RER1), mRNA. /PROD=similar to S. cerevisiae RER1 /FL=gb:NM_007033.1 gb:BC004965.1 gb:AF157324.1
AK6///TAF9	202168_at	0.0318149	0.000484058	1.04454	0.0628737	1.04454	up	-1.71334	-0.776814	1.71334	down	-1.53654	-0.619689	1.53654	down	-1.45145	-0.537499	1.45145	down	6880///102157402	Hs.653163	gb:NM_003187.1 /DB_XREF=gi:4507350 /GEN=TAF2G /FEA=FLmRNA /CNT=184 /TID=Hs.60679.0 /TIER=FL+Stack /STK=58 /UG=Hs.60679 /LL=6880 /DEF=Homo sapiens TATA box binding protein (TBP)-associated factor, RNA polymerase II, G, 32kD (TAF2G), mRNA. /PROD=TATA box binding protein (TBP)-associatedfactor, RNA polymerase II, G, 32kD /FL=gb:NM_003187.1 gb:U30504.1 gb:U25112.1 gb:U21858.1 gb:BC003400.1
IL6ST	211000_s_at	0.0318149	0.000484797	-1.96747	-0.976341	1.96747	down	-2.21301	-1.14601	2.21301	down	-3.82315	-1.93476	3.82315	down	-1.83676	-0.877161	1.83676	down	3572	Hs.532082	gb:AB015706.1 /DB_XREF=gi:4972293 /GEN=gp130 /FEA=FLmRNA /CNT=2 /TID=Hs.82065.1 /TIER=FL /STK=0 /UG=Hs.82065 /LL=3572 /DEF=Homo sapiens mRNA for gp130 of the rheumatoid arthritis antigenic peptide-bearing soluble form (gp130-RAPS), complete cds. /PROD=gp130 of the rheumatoid arthritis antigenicpeptide-bearing soluble form (gp130-RAPS) /FL=gb:AB015706.1
PPP3CB	202432_at	0.0318149	0.000484833	1.17573	0.233552	1.17573	up	1.41954	0.505427	1.41954	up	1.58506	0.664533	1.58506	up	1.38966	0.474732	1.38966	up	5532	Hs.500067	gb:NM_021132.1 /DB_XREF=gi:11036639 /GEN=PPP3CB /FEA=FLmRNA /CNT=136 /TID=Hs.151531.0 /TIER=FL /STK=0 /UG=Hs.151531 /LL=5532 /DEF=Homo sapiens protein phosphatase 3 (formerly 2B), catalytic subunit, beta isoform (calcineurin A beta) (PPP3CB), mRNA. /PROD=protein phosphatase 3 (formerly 2B), catalyticsubunit, beta isoform (calcineurin A beta) /FL=gb:NM_021132.1 gb:M29551.1
KIAA0754///MACF1	241896_at	0.0318149	0.000484996	-1.07053	-0.0983259	1.07053	down	1.12643	0.171754	1.12643	up	1.23788	0.307875	1.23788	up	1.05268	0.0740616	1.05268	up	23499///643314	Hs.692278	gb:AI017174 /DB_XREF=gi:3231510 /DB_XREF=ou28b08.x1 /CLONE=IMAGE:1627575 /FEA=EST /CNT=3 /TID=Hs.62790.0 /TIER=ConsEnd /STK=3 /UG=Hs.62790 /UG_TITLE=ESTs, Highly similar to S66292 actin-crosslinking protein ACF7 (H.sapiens)
TRIO	209011_at	0.0318149	0.000485297	-1.01598	-0.0228774	1.01598	down	1.21795	0.28446	1.21795	up	1.77537	0.828119	1.77537	up	1.5569	0.638674	1.5569	up	7204	Hs.130031	gb:BF223718 /DB_XREF=gi:11130896 /DB_XREF=7q34g07.x1 /CLONE=IMAGE:3700405 /FEA=FLmRNA /CNT=235 /TID=Hs.171957.1 /TIER=Stack /STK=13 /UG=Hs.171957 /LL=7204 /UG_GENE=TRIO /UG_TITLE=triple functional domain (PTPRF interacting) /FL=gb:AF091395.1
DNAJC14	1554451_s_at	0.0319844	0.000488467	1.19013	0.251121	1.19013	up	1.65543	0.727205	1.65543	up	1.68195	0.750137	1.68195	up	2.67395	1.41897	2.67395	up	85406	Hs.709320	gb:AF141342.1 /DB_XREF=gi:12239359 /TID=Hs2.375025.1 /CNT=17 /FEA=FLmRNA /TIER=FL /STK=1 /LL=85406 /UG_GENE=DRIP78 /UG=Hs.375025 /DEF=Homo sapiens LYST-interacting protein LIP6 mRNA, complete cds. /PROD=LYST-interacting protein LIP6 /FL=gb:AF141342.1
	241929_at	0.0320107	0.000489456	1.778	0.830258	1.778	up	7.49617	2.90615	7.49617	up	7.04737	2.81708	7.04737	up	4.48383	2.16473	4.48383	up		Hs.656268	gb:AV760302 /DB_XREF=gi:10918150 /DB_XREF=AV760302 /CLONE=MDSCID11 /FEA=EST /CNT=10 /TID=Hs.120949.1 /TIER=ConsEnd /STK=0 /UG=Hs.120949 /UG_TITLE=ESTs, Weakly similar to ALU7_HUMAN ALU SUBFAMILY SQ SEQUENCE CONTAMINATION WARNING ENTRY (H.sapiens)
SSH1	221753_at	0.0320787	0.000491466	1.17891	0.237454	1.17891	up	1.71838	0.781047	1.71838	up	1.25775	0.330848	1.25775	up	-1.21764	-0.284091	1.21764	down	54434	Hs.199763	gb:AI651213 /DB_XREF=gi:4735192 /DB_XREF=wa98a11.x1 /CLONE=IMAGE:2304188 /FEA=mRNA /CNT=143 /TID=Hs.60377.0 /TIER=Stack /STK=12 /UG=Hs.60377 /LL=54434 /UG_GENE=KIAA1298 /UG_TITLE=KIAA1298 protein
TUSC2	203272_s_at	0.0320787	0.000491732	-1.05141	-0.0723231	1.05141	down	1.21104	0.276242	1.21104	up	1.11998	0.163468	1.11998	up	1.56069	0.64218	1.56069	up	11334	Hs.517981	gb:BF308548 /DB_XREF=gi:11255776 /DB_XREF=601890403F1 /CLONE=IMAGE:4131457 /FEA=FLmRNA /CNT=138 /TID=Hs.8186.0 /TIER=Stack /STK=30 /UG=Hs.8186 /LL=11334 /UG_GENE=FUS1 /UG_TITLE=lung cancer candidate /FL=gb:AF055479.1 gb:NM_007275.1
PIGY///PYURF	224661_at	0.0320787	0.000492255	-1.09628	-0.132622	1.09628	down	-1.67981	-0.748301	1.67981	down	-1.68075	-0.749107	1.68075	down	-1.21309	-0.278689	1.21309	down	84992///100996939	Hs.26136///Hs.743393	gb:AW028485 /DB_XREF=gi:5887241 /DB_XREF=wv27b02.x1 /CLONE=IMAGE:2530731 /FEA=EST /CNT=241 /TID=Hs.26136.0 /TIER=Stack /STK=10 /UG=Hs.26136 /UG_TITLE=ESTs
EIF4EBP2	208770_s_at	0.0321335	0.000493684	1.08248	0.114345	1.08248	up	1.29515	0.373115	1.29515	up	1.48382	0.569316	1.48382	up	1.44519	0.531263	1.44519	up	1979	Hs.621200	gb:BC005057.1 /DB_XREF=gi:13477190 /FEA=FLmRNA /CNT=301 /TID=Hs.278712.0 /TIER=FL+Stack /STK=100 /UG=Hs.278712 /LL=1979 /UG_GENE=EIF4EBP2 /DEF=Homo sapiens, eukaryotic translation initiation factor 4E binding protein 2, clone MGC:12944, mRNA, complete cds. /PROD=eukaryotic translation initiation factor 4Ebinding protein 2 /FL=gb:BC005057.1 gb:NM_004096.1 gb:L36056.1
LOC101929280	1569396_at	0.0321629	0.000494724	-1.24619	-0.317526	1.24619	down	1.02833	0.0403016	1.02833	up	1.08597	0.118987	1.08597	up	-1.01991	-0.0284375	1.01991	down	101929280	Hs.459630	gb:BC014531.1 /DB_XREF=gi:17939552 /TID=Hs2.401169.1 /CNT=4 /FEA=mRNA /TIER=ConsEnd /STK=0 /UG=Hs.401169 /UG_TITLE=Homo sapiens, clone IMAGE:3936492, mRNA /DEF=Homo sapiens, clone IMAGE:3936492, mRNA.
DDX59	223662_x_at	0.032233	0.000496391	-1.19024	-0.251251	1.19024	down	1.15447	0.207225	1.15447	up	-1.06102	-0.0854479	1.06102	down	-1.6503	-0.722724	1.6503	down	83479		gb:AL136611.1 /DB_XREF=gi:12052747 /GEN=DKFZp564B1023 /FEA=FLmRNA /CNT=22 /TID=Hs.95321.0 /TIER=FL /STK=0 /UG=Hs.95321 /DEF=Homo sapiens mRNA; cDNA DKFZp564B1023 (from clone DKFZp564B1023); complete cds. /PROD=hypothetical protein /FL=gb:AL136611.1
SAV1	222573_s_at	0.0324127	0.000499752	-1.23882	-0.308961	1.23882	down	1.35832	0.441822	1.35832	up	-1.16982	-0.226282	1.16982	down	1.24411	0.315118	1.24411	up	60485	Hs.642842	gb:AI679398 /DB_XREF=gi:4889580 /DB_XREF=tu63c08.x1 /CLONE=IMAGE:2255726 /FEA=FLmRNA /CNT=115 /TID=Hs.288906.0 /TIER=Stack /STK=11 /UG=Hs.288906 /LL=60485 /UG_GENE=WW45 /UG_TITLE=WW Domain-Containing Gene /FL=gb:NM_021818.1
TUBGCP2	202476_s_at	0.0324148	0.000500572	-1.25939	-0.332723	1.25939	down	1.11025	0.150891	1.11025	up	1.00628	0.00903473	1.00628	up	1.55089	0.633095	1.55089	up	10844	Hs.523370	gb:BF002130 /DB_XREF=gi:10702405 /DB_XREF=7g99f03.x1 /CLONE=IMAGE:3314621 /FEA=FLmRNA /CNT=176 /TID=Hs.13386.0 /TIER=Stack /STK=26 /UG=Hs.13386 /LL=10844 /UG_GENE=GCP2 /UG_TITLE=gamma-tubulin complex protein 2 /FL=gb:BC005011.1 gb:AF042379.1 gb:NM_006659.1
CDC42EP3	209288_s_at	0.0324148	0.000500969	1.78106	0.832739	1.78106	up	5.07489	2.34338	5.07489	up	4.11109	2.03952	4.11109	up	4.48907	2.16642	4.48907	up	10602	Hs.369574	gb:AL136842.1 /DB_XREF=gi:6807668 /GEN=DKFZp434A0530 /FEA=FLmRNA /CNT=172 /TID=Hs.260024.0 /TIER=FL /STK=0 /UG=Hs.260024 /LL=10602 /DEF=Homo sapiens mRNA; cDNA DKFZp434A0530 (from clone DKFZp434A0530); complete cds. /PROD=hypothetical protein /FL=gb:AF164118.1 gb:NM_006449.1 gb:AF094521.1 gb:AF104857.1 gb:AL136842.1
S1PR5	230464_at	0.032433	0.000501844	1.95366	0.96618	1.95366	up	-3.17116	-1.66501	3.17116	down	-1.47164	-0.557429	1.47164	down	-2.57532	-1.36475	2.57532	down	53637	Hs.501561	gb:AI814092 /DB_XREF=gi:5425307 /DB_XREF=wk62f10.x1 /CLONE=IMAGE:2420011 /FEA=EST /CNT=16 /TID=Hs.46668.0 /TIER=Stack /STK=13 /UG=Hs.46668 /UG_TITLE=ESTs
B3GNT7	1555962_at	0.032437	0.000503295	1.40755	0.493189	1.40755	up	-2.69353	-1.4295	2.69353	down	-1.59813	-0.676386	1.59813	down	-2.13797	-1.09624	2.13797	down	93010	Hs.299329	gb:CA503291 /DB_XREF=gi:24994245 /DB_XREF=UI-CF-FN0-afq-e-12-0-UI.s1 /CLONE=UI-CF-FN0-afq-e-12-0-UI /TID=Hs2.299329.2 /CNT=13 /FEA=mRNA /TIER=Stack /STK=9 /LL=93010 /UG_GENE=B3GNT7 /UG=Hs.299329 /UG_TITLE=UDP-GlcNAc:betaGal beta-1,3-N-acetylglucosaminyltransferase 7
	237176_at	0.032437	0.000503995	1.10485	0.143856	1.10485	up	3.06075	1.61388	3.06075	up	2.32781	1.21898	2.32781	up	1.03057	0.0434483	1.03057	up		Hs.665355	gb:AW205969 /DB_XREF=gi:6505443 /DB_XREF=UI-H-BI1-afy-c-04-0-UI.s1 /CLONE=IMAGE:2723334 /FEA=EST /CNT=5 /TID=Hs.131808.0 /TIER=ConsEnd /STK=5 /UG=Hs.131808 /UG_TITLE=ESTs
	242425_at	0.032437	0.00050428	-1.27663	-0.35234	1.27663	down	-1.06695	-0.0934922	1.06695	down	-1.75511	-0.81156	1.75511	down	-1.83711	-0.877436	1.83711	down		Hs.661595	gb:BF823525 /DB_XREF=gi:12164419 /DB_XREF=MR1-RT0031-211200-001-c01 /FEA=EST /CNT=6 /TID=Hs.257266.0 /TIER=ConsEnd /STK=0 /UG=Hs.257266 /UG_TITLE=ESTs
AP1S1	205196_s_at	0.032437	0.00050485	-1.23557	-0.305182	1.23557	down	-1.00955	-0.0137067	1.00955	down	-1.24335	-0.314228	1.24335	down	1.41068	0.496389	1.41068	up	1174	Hs.489365	gb:NM_001283.1 /DB_XREF=gi:4557470 /GEN=AP1S1 /FEA=FLmRNA /CNT=47 /TID=Hs.57600.0 /TIER=FL /STK=0 /UG=Hs.57600 /LL=1174 /DEF=Homo sapiens adaptor-related protein complex 1, sigma 1 subunit (AP1S1), mRNA. /PROD=adaptor-related protein complex 1, sigma 1subunit /FL=gb:AB015319.1 gb:NM_001283.1
NUDT3///RPS10-NUDT3	221579_s_at	0.032437	0.000504871	1.0416	0.058808	1.0416	up	1.87969	0.910494	1.87969	up	1.45003	0.536084	1.45003	up	2.56267	1.35765	2.56267	up	11165///100529239	Hs.188882	gb:AF062530.1 /DB_XREF=gi:3978225 /FEA=FLmRNA /CNT=62 /TID=Hs.4815.0 /TIER=FL+Stack /STK=16 /UG=Hs.4815 /LL=11165 /UG_GENE=NUDT3 /DEF=Homo sapiens clone 469920 diphosphoinositol polyphosphate phosphohydrolase mRNA, complete cds. /PROD=diphosphoinositol polyphosphatephosphohydrolase /FL=gb:AF062530.1 gb:AF062529.1 gb:NM_006703.1
2002-03-01	210075_at	0.0325426	0.000507111	-1.31866	-0.399068	1.31866	down	2.43566	1.28431	2.43566	up	1.72582	0.787279	1.72582	up	2.84346	1.50764	2.84346	up	51257	Hs.631861	gb:AF151074.1 /DB_XREF=gi:7106869 /FEA=FLmRNA /CNT=21 /TID=Hs.132744.0 /TIER=FL /STK=2 /UG=Hs.132744 /LL=51257 /UG_GENE=LOC51257 /DEF=Homo sapiens HSPC240 mRNA, complete cds. /PROD=HSPC240 /FL=gb:NM_016496.1 gb:AF151074.1
NLN	228797_at	0.0326011	0.000508619	-1.0825	-0.11437	1.0825	down	1.43186	0.517886	1.43186	up	1.35453	0.437789	1.35453	up	1.05533	0.0776891	1.05533	up	57486	Hs.247460	gb:AI140917 /DB_XREF=gi:3648374 /DB_XREF=qa56g12.s1 /CLONE=IMAGE:1690822 /FEA=EST /CNT=25 /TID=Hs.7968.0 /TIER=Stack /STK=21 /UG=Hs.7968 /UG_TITLE=ESTs
APAF1	211554_s_at	0.0326077	0.00051004	1.2788	0.354787	1.2788	up	1.84991	0.887459	1.84991	up	1.67827	0.746974	1.67827	up	2.20682	1.14197	2.20682	up	317	Hs.552567	gb:AF149794.1 /DB_XREF=gi:4929486 /GEN=APAF1 /FEA=FLmRNA /CNT=4 /TID=Hs.77579.2 /TIER=FL /STK=0 /UG=Hs.77579 /LL=317 /DEF=Homo sapiens apoptotic protease activating factor 1 (APAF1) mRNA, complete cds. /PROD=apoptotic protease activating factor 1 /FL=gb:AF248734.1 gb:AF149794.1
CTNS	204925_at	0.0326077	0.000511163	-1.07418	-0.103236	1.07418	down	1.43648	0.522537	1.43648	up	1.37565	0.460113	1.37565	up	1.84303	0.882077	1.84303	up	1497	Hs.187667	gb:NM_004937.1 /DB_XREF=gi:4826681 /GEN=CTNS /FEA=FLmRNA /CNT=63 /TID=Hs.64837.0 /TIER=FL+Stack /STK=31 /UG=Hs.64837 /LL=1497 /DEF=Homo sapiens cystinosis, nephropathic (CTNS), mRNA. /PROD=cystinosis, nephropathic /FL=gb:NM_004937.1
DESI2	222158_s_at	0.0326077	0.00051188	-1.15926	-0.21321	1.15926	down	1.11606	0.15842	1.11606	up	-2.82738	-1.49947	2.82738	down	-1.41083	-0.496544	1.41083	down	51029	Hs.498317	gb:AF229834.1 /DB_XREF=gi:7229639 /GEN=PNAS-4 /FEA=mRNA /CNT=5 /TID=Hs.42409.4 /TIER=ConsEnd /STK=0 /UG=Hs.42409 /LL=51029 /DEF=Homo sapiens apoptosis-related protein PNAS-4 (PNAS-4) mRNA, partial cds. /PROD=apoptosis-related protein PNAS-4
	242012_at	0.0326077	0.00051208	-1.13249	-0.1795	1.13249	down	1.1505	0.202267	1.1505	up	1.30055	0.379121	1.30055	up	-1.01055	-0.0151415	1.01055	down			gb:BF509058 /DB_XREF=gi:11592356 /DB_XREF=UI-H-BI4-aou-a-02-0-UI.s1 /CLONE=IMAGE:3086090 /FEA=EST /CNT=3 /TID=Hs.146106.0 /TIER=ConsEnd /STK=3 /UG=Hs.146106 /UG_TITLE=ESTs, Moderately similar to transmembrane 9 superfamily member 2 (H.sapiens)
AK2	208967_s_at	0.0326077	0.000512477	-1.04749	-0.0669383	1.04749	down	-1.36248	-0.446233	1.36248	down	-1.35867	-0.442198	1.35867	down	1.17125	0.228045	1.17125	up	204	Hs.470907	gb:U39945.1 /DB_XREF=gi:1209686 /GEN=adk2 /FEA=FLmRNA /CNT=244 /TID=Hs.171811.1 /TIER=FL+Stack /STK=115 /UG=Hs.171811 /LL=204 /DEF=Human adenylate kinase 2 (adk2) mRNA, complete cds. /PROD=adenylate kinase 2 /FL=gb:U39945.1 gb:NM_001625.1 gb:U84371.1
PARVG	223562_at	0.0326077	0.000512499	1.10771	0.147586	1.10771	up	1.48857	0.573928	1.48857	up	1.65601	0.727714	1.65601	up	1.74329	0.801816	1.74329	up	64098	Hs.658995	gb:AF237772.1 /DB_XREF=gi:11036541 /GEN=PARVG /FEA=FLmRNA /CNT=31 /TID=Hs.120243.0 /TIER=FL /STK=4 /UG=Hs.120243 /LL=64098 /DEF=Homo sapiens gamma-parvin (PARVG) mRNA, complete cds. /PROD=gamma-parvin /FL=gb:NM_022141.1 gb:AF237772.1
PDLIM5	216804_s_at	0.0326077	0.000512897	1.35286	0.436011	1.35286	up	2.07801	1.0552	2.07801	up	1.45122	0.537265	1.45122	up	2.37169	1.24592	2.37169	up	10611	Hs.480311///Hs.732677	gb:AK027217.1 /DB_XREF=gi:10440296 /FEA=mRNA /CNT=1 /TID=Hs.306913.0 /TIER=ConsEnd /STK=0 /UG=Hs.306913 /UG_TITLE=Homo sapiens cDNA: FLJ23564 fis, clone LNG10773 /DEF=Homo sapiens cDNA: FLJ23564 fis, clone LNG10773.
PARP11	220315_at	0.0326086	0.000513828	1.16083	0.215155	1.16083	up	-1.94985	-0.963367	1.94985	down	-1.86699	-0.900712	1.86699	down	-2.08705	-1.06146	2.08705	down	57097	Hs.657268	gb:NM_020367.1 /DB_XREF=gi:9966836 /GEN=C12ORF6 /FEA=FLmRNA /CNT=12 /TID=Hs.188189.0 /TIER=FL /STK=0 /UG=Hs.188189 /LL=57097 /DEF=Homo sapiens chromosome 12 open reading frame 6 (C12ORF6), mRNA. /PROD=chromosome 12 open reading frame 6 /FL=gb:AF263540.1 gb:NM_020367.1
	236625_at	0.0326086	0.000514104	-1.08142	-0.112931	1.08142	down	1.61012	0.687164	1.61012	up	1.46945	0.55528	1.46945	up	1.16045	0.214679	1.16045	up		Hs.661618	gb:AI475574 /DB_XREF=gi:4328619 /DB_XREF=tc92e04.y1 /CLONE=IMAGE:2073630 /FEA=EST /CNT=9 /TID=Hs.137432.0 /TIER=ConsEnd /STK=6 /UG=Hs.137432 /UG_TITLE=ESTs
ABTB1	226442_at	0.0326137	0.000515016	-1.1249	-0.1698	1.1249	down	2.52427	1.33587	2.52427	up	1.99089	0.993413	1.99089	up	3.26841	1.70859	3.26841	up	80325	Hs.107812	gb:H06267 /DB_XREF=gi:869819 /DB_XREF=yl79a05.s1 /CLONE=IMAGE:44083 /FEA=EST /CNT=45 /TID=Hs.321640.0 /TIER=Stack /STK=34 /UG=Hs.321640 /UG_TITLE=ESTs, Highly similar to JC7326 bood POZ containing protein (H.sapiens)
PFDN1	201507_at	0.0326137	0.000515377	1.04763	0.0671272	1.04763	up	-1.61854	-0.694697	1.61854	down	-1.47682	-0.562495	1.47682	down	-1.35452	-0.437777	1.35452	down	5201	Hs.483564	gb:NM_002622.2 /DB_XREF=gi:12408673 /GEN=PFDN1 /FEA=FLmRNA /CNT=275 /TID=Hs.132881.0 /TIER=FL+Stack /STK=108 /UG=Hs.132881 /LL=5201 /DEF=Homo sapiens prefoldin 1 (PFDN1), mRNA. /PROD=prefoldin 1 /FL=gb:NM_002622.2
ELMOD2	233912_x_at	0.0326314	0.000516253	-1.13879	-0.187506	1.13879	down	-1.32423	-0.405149	1.32423	down	-1.8199	-0.86386	1.8199	down	-1.45593	-0.541939	1.45593	down	255520	Hs.677038	gb:AK021525.1 /DB_XREF=gi:10432722 /FEA=mRNA /CNT=2 /TID=Hs.288888.0 /TIER=ConsEnd /STK=0 /UG=Hs.288888 /UG_TITLE=Homo sapiens cDNA FLJ11463 fis, clone HEMBA1001608 /DEF=Homo sapiens cDNA FLJ11463 fis, clone HEMBA1001608.
ATF7IP	231825_x_at	0.0326639	0.000517827	-1.36232	-0.446066	1.36232	down	1.14845	0.199686	1.14845	up	1.00695	0.00999464	1.00695	up	-1.898	-0.924482	1.898	down	55729	Hs.591151	gb:AK025060.1 /DB_XREF=gi:10437499 /FEA=mRNA /CNT=37 /TID=Hs.118793.1 /TIER=ConsEnd /STK=0 /UG=Hs.118793 /LL=55729 /UG_GENE=FLJ10688 /UG_TITLE=hypothetical protein FLJ10688 /DEF=Homo sapiens cDNA: FLJ21407 fis, clone COL03864.
ARID3A	205865_at	0.0326639	0.000518646	1.03299	0.0468198	1.03299	up	2.04362	1.03112	2.04362	up	1.52468	0.608509	1.52468	up	1.65349	0.725515	1.65349	up	1820	Hs.501296	gb:NM_005224.1 /DB_XREF=gi:4885192 /GEN=DRIL1 /FEA=FLmRNA /CNT=23 /TID=Hs.198515.0 /TIER=FL /STK=5 /UG=Hs.198515 /LL=1820 /DEF=Homo sapiens dead ringer (Drosophila)-like 1 (DRIL1), mRNA. /PROD=dead ringer-like 1 /FL=gb:U88047.1 gb:NM_005224.1
SP1	224760_at	0.0326639	0.000518811	1.206	0.270224	1.206	up	2.27105	1.18336	2.27105	up	2.26555	1.17986	2.26555	up	2.73035	1.44908	2.73035	up	6667	Hs.649191	gb:AI795991 /DB_XREF=gi:5361454 /DB_XREF=wh41a08.x1 /CLONE=IMAGE:2383286 /FEA=mRNA /CNT=201 /TID=Hs.9460.0 /TIER=Stack /STK=34 /UG=Hs.9460 /UG_TITLE=Homo sapiens mRNA; cDNA DKFZp547C244 (from clone DKFZp547C244)
	244349_at	0.0326639	0.000519307	-1.12136	-0.165244	1.12136	down	2.15608	1.10841	2.15608	up	-1.76458	-0.819327	1.76458	down	-1.43928	-0.525343	1.43928	down		Hs.665457	gb:AI807658 /DB_XREF=gi:5394224 /DB_XREF=wf49e08.x1 /CLONE=IMAGE:2358950 /FEA=EST /CNT=6 /TID=Hs.192326.0 /TIER=ConsEnd /STK=3 /UG=Hs.192326 /UG_TITLE=ESTs
TKT	208699_x_at	0.0326639	0.000520259	-1.15131	-0.203282	1.15131	down	2.96659	1.56881	2.96659	up	2.52349	1.33542	2.52349	up	3.6585	1.87125	3.6585	up	7086	Hs.89643	gb:BF696840 /DB_XREF=gi:11982248 /DB_XREF=602125377F1 /CLONE=IMAGE:4282458 /FEA=FLmRNA /CNT=462 /TID=Hs.89643.0 /TIER=Stack /STK=13 /UG=Hs.89643 /LL=7086 /UG_GENE=TKT /UG_TITLE=transketolase (Wernicke-Korsakoff syndrome) /FL=gb:NM_001064.1 gb:L12711.1 gb:U55017.1
NGRN	217722_s_at	0.0326639	0.000520655	-1.02123	-0.0303128	1.02123	down	-2.19611	-1.13495	2.19611	down	-1.75241	-0.809344	1.75241	down	-1.61648	-0.692858	1.61648	down	51335	Hs.135471	gb:NM_016645.1 /DB_XREF=gi:7706195 /GEN=LOC51335 /FEA=FLmRNA /CNT=468 /TID=Hs.323467.0 /TIER=FL+Stack /STK=166 /UG=Hs.323467 /LL=51335 /DEF=Homo sapiens mesenchymal stem cell protein DSC92 (LOC51335), mRNA. /PROD=mesenchymal stem cell protein DSC92 /FL=gb:AB029315.1 gb:AF242770.1 gb:NM_016645.1
APOLD1///DDX47	220890_s_at	0.0326639	0.000521056	-1.05339	-0.0750422	1.05339	down	-2.66071	-1.41181	2.66071	down	-1.74805	-0.805748	1.74805	down	-1.99566	-0.996869	1.99566	down	51202///81575	Hs.719938	gb:NM_016355.1 /DB_XREF=gi:10047107 /GEN=LOC51202 /FEA=FLmRNA /CNT=3 /TID=Hs.284288.0 /TIER=FL /STK=0 /UG=Hs.284288 /LL=51202 /DEF=Homo sapiens hqp0256 protein (LOC51202), mRNA. /PROD=hqp0256 protein /FL=gb:NM_016355.1 gb:AF078843.1
	244815_at	0.0326639	0.000521933	-1.44392	-0.529992	1.44392	down	-1.24165	-0.312259	1.24165	down	-2.66917	-1.41639	2.66917	down	-3.22537	-1.68947	3.22537	down			gb:AA021559 /DB_XREF=gi:1485221 /DB_XREF=ze69b06.s1 /CLONE=IMAGE:364211 /FEA=EST /CNT=3 /TID=Hs.33271.0 /TIER=ConsEnd /STK=3 /UG=Hs.33271 /UG_TITLE=ESTs, Highly similar to KIAA1453 protein (H.sapiens)
COLGALT1	218473_s_at	0.0326639	0.000522144	1.06352	0.088843	1.06352	up	1.56341	0.6447	1.56341	up	1.87003	0.90306	1.87003	up	1.59134	0.67024	1.59134	up	79709	Hs.418795	gb:NM_024656.1 /DB_XREF=gi:13375904 /GEN=FLJ22329 /FEA=FLmRNA /CNT=88 /TID=Hs.61478.0 /TIER=FL+Stack /STK=40 /UG=Hs.61478 /LL=79709 /DEF=Homo sapiens hypothetical protein FLJ22329 (FLJ22329), mRNA. /PROD=hypothetical protein FLJ22329 /FL=gb:NM_024656.1
AZU1	214575_s_at	0.0326936	0.000523993	-2.34941	-1.2323	2.34941	down	5.2036	2.37951	5.2036	up	1.76292	0.817971	1.76292	up	12.5452	3.64907	12.5452	up	566	Hs.72885	gb:NM_001700.1 /DB_XREF=gi:11342669 /GEN=AZU1 /FEA=FLmRNA /CNT=3 /TID=Hs.72885.0 /TIER=FL /STK=0 /UG=Hs.72885 /LL=566 /DEF=Homo sapiens azurocidin 1 (cationic antimicrobial protein 37) (AZU1), mRNA. /PROD=azurocidin 1 (cationic antimicrobial protein37) /FL=gb:NM_001700.1
ACTG1	211970_x_at	0.0326936	0.000524543	1.01545	0.0221163	1.01545	up	1.39904	0.484437	1.39904	up	1.35026	0.433239	1.35026	up	1.32593	0.407006	1.32593	up	71	Hs.514581	gb:BG026805 /DB_XREF=gi:12414790 /DB_XREF=602294278F1 /CLONE=IMAGE:4388898 /FEA=EST /CNT=368 /TID=Hs.14376.4 /TIER=Stack /STK=271 /UG=Hs.14376 /LL=71 /UG_GENE=ACTG1 /UG_TITLE=actin, gamma 1
MED27	51176_at	0.0326936	0.000524727	1.18313	0.24261	1.18313	up	-1.63475	-0.70907	1.63475	down	-1.47054	-0.556342	1.47054	down	-1.63571	-0.709918	1.63571	down	9442	Hs.374262	Cluster Incl. AA131335:zo08f01.s1 Homo sapiens cDNA, 3 end /clone=IMAGE-567097 /clone_end=3' /gb=AA131335 /gi=1692833 /ug=Hs.28166 /len=552
SRRT	201679_at	0.0326936	0.000525011	-1.02789	-0.0396878	1.02789	down	-1.19851	-0.261241	1.19851	down	1.05357	0.0752796	1.05357	up	1.63661	0.710708	1.63661	up	51593	Hs.111801	gb:BE646076 /DB_XREF=gi:9970376 /DB_XREF=7e92g12.x1 /CLONE=IMAGE:3292678 /FEA=FLmRNA /CNT=220 /TID=Hs.111801.0 /TIER=Stack /STK=13 /UG=Hs.111801 /LL=51593 /UG_GENE=ARS2 /UG_TITLE=arsenate resistance protein ARS2 /FL=gb:NM_015908.1 gb:AF082871.1 gb:BC000082.1
RAB36	211471_s_at	0.0327096	0.000525866	-1.11104	-0.151912	1.11104	down	1.20915	0.27399	1.20915	up	-1.03453	-0.0489717	1.03453	down	-1.19424	-0.256097	1.19424	down	9609	Hs.369557	gb:AF133588.1 /DB_XREF=gi:6049163 /GEN=RAB36 /FEA=FLmRNA /CNT=1 /TID=Hs.38772.1 /TIER=FL /STK=0 /UG=Hs.38772 /LL=9609 /DEF=Homo sapiens RAB36 (RAB36) mRNA, complete cds. /PROD=RAB36 /FL=gb:AF133588.1
SSPN	204964_s_at	0.0328913	0.000529573	-1.33148	-0.413032	1.33148	down	-1.06896	-0.0962042	1.06896	down	-1.0402	-0.0568578	1.0402	down	-1.15754	-0.211058	1.15754	down	8082	Hs.183428	gb:NM_005086.2 /DB_XREF=gi:7669543 /GEN=SSPN /FEA=FLmRNA /CNT=59 /TID=Hs.183428.0 /TIER=FL /STK=0 /UG=Hs.183428 /LL=8082 /DEF=Homo sapiens sarcospan (Kras oncogene-associated gene) (SSPN), mRNA. /PROD=sarcospan (Kras oncogene-associated gene) /FL=gb:AF016028.2 gb:AL136756.1 gb:NM_005086.2
C3orf38	226524_at	0.0328913	0.000530538	1.32923	0.410595	1.32923	up	-1.69985	-0.76541	1.69985	down	-2.04338	-1.03096	2.04338	down	-1.0874	-0.120889	1.0874	down	285237	Hs.518099	gb:AI458735 /DB_XREF=gi:4311314 /DB_XREF=tj97e12.x1 /CLONE=IMAGE:2149486 /FEA=EST /CNT=46 /TID=Hs.39457.0 /TIER=Stack /STK=12 /UG=Hs.39457 /UG_TITLE=ESTs
AP2A1	234068_s_at	0.0328913	0.000531976	1.11505	0.157115	1.11505	up	2.20314	1.13956	2.20314	up	1.79121	0.840937	1.79121	up	2.91298	1.54249	2.91298	up	160	Hs.467125	gb:AC006942 /DB_XREF=gi:4314339 /FEA=DNA_1 /CNT=2 /TID=Hs.296426.1 /TIER=ConsEnd /STK=0 /UG=Hs.296426 /LL=160 /UG_GENE=AP2A1 /UG_TITLE=adaptor-related protein complex 2, alpha 1 subunit /DEF=Homo sapiens chromosome 19, cosmid R31181
SLC38A10	242942_at	0.0328913	0.000532013	-1.22358	-0.291114	1.22358	down	1.0152	0.0217691	1.0152	up	1.1396	0.188523	1.1396	up	1.62746	0.702623	1.62746	up	124565	Hs.352240	gb:BE541641 /DB_XREF=gi:9770286 /DB_XREF=601067734F1 /CLONE=IMAGE:3454016 /FEA=EST /CNT=8 /TID=Hs.301785.1 /TIER=ConsEnd /STK=0 /UG=Hs.301785 /UG_TITLE=ESTs, Weakly similar to Yel064cp (S.cerevisiae)
MRPL57	204387_x_at	0.0328913	0.000532187	-1.29177	-0.369349	1.29177	down	-1.10382	-0.142501	1.10382	down	-1.2811	-0.357378	1.2811	down	-1.56998	-0.650749	1.56998	down	78988	Hs.458367	gb:NM_024026.1 /DB_XREF=gi:13128969 /GEN=MGC3243 /FEA=FLmRNA /CNT=71 /TID=Hs.182695.0 /TIER=FL /STK=0 /UG=Hs.182695 /LL=78988 /DEF=Homo sapiens hypothetical protein MGC3243 (MGC3243), mRNA. /PROD=hypothetical protein MGC3243 /FL=gb:NM_024026.1 gb:BC000002.1
PPP2R5C	1554365_a_at	0.0328913	0.00053319	1.2508	0.322855	1.2508	up	-1.63405	-0.708454	1.63405	down	-1.32875	-0.410073	1.32875	down	-1.38898	-0.474027	1.38898	down	5527	Hs.368264	gb:BC016183.1 /DB_XREF=gi:16740598 /TID=Hs2.171734.2 /CNT=3 /FEA=FLmRNA /TIER=FL /STK=2 /LL=5527 /UG_GENE=PPP2R5C /UG=Hs.171734 /DEF=Homo sapiens, Similar to protein phosphatase 2, regulatory subunit B (B56), gamma isoform, clone MGC:23064 IMAGE:4855950, mRNA, complete cds. /PROD=Similar to protein phosphatase 2, regulatorysubunit B (B56), gamma isoform /FL=gb:BC016183.1
IMPAD1	224743_at	0.0328913	0.000533358	1.1603	0.214495	1.1603	up	1.54316	0.625886	1.54316	up	1.69433	0.760712	1.69433	up	1.36564	0.449578	1.36564	up	54928	Hs.438689	gb:BF674724 /DB_XREF=gi:11948619 /DB_XREF=602136866F1 /CLONE=IMAGE:4273120 /FEA=EST /CNT=146 /TID=Hs.13328.0 /TIER=Stack /STK=66 /UG=Hs.13328 /UG_TITLE=ESTs
	1567045_at	0.0328913	0.000533715	-2.0108	-1.00777	2.0108	down	-1.65293	-0.725022	1.65293	down	-3.73479	-1.90103	3.73479	down	-3.64366	-1.86539	3.64366	down		Hs.658131	gb:AF085866.1 /DB_XREF=gi:3483187 /TID=Hs2.407368.1 /CNT=1 /FEA=mRNA /TIER=ConsEnd /STK=0 /UG=Hs.407368 /UG_TITLE=Homo sapiens full length insert cDNA clone YN86A01 /DEF=Homo sapiens full length insert cDNA clone YN86A01.
THTPA	218540_at	0.0328913	0.000534202	1.07746	0.107635	1.07746	up	1.57262	0.653172	1.57262	up	1.5655	0.646627	1.5655	up	1.90572	0.930339	1.90572	up	79178	Hs.655179	gb:NM_024328.1 /DB_XREF=gi:13236576 /GEN=MGC2652 /FEA=FLmRNA /CNT=86 /TID=Hs.15098.0 /TIER=FL+Stack /STK=45 /UG=Hs.15098 /LL=79178 /DEF=Homo sapiens hypothetical protein MGC2652 (MGC2652), mRNA. /PROD=hypothetical protein MGC2652 /FL=gb:NM_024328.1 gb:BC002984.1
ACTG1	221607_x_at	0.0329847	0.000536411	-1.00062	-0.000899136	1.00062	down	1.35974	0.443335	1.35974	up	1.30417	0.383129	1.30417	up	1.3689	0.453018	1.3689	up	71	Hs.514581	gb:BC001920.1 /DB_XREF=gi:12804934 /FEA=FLmRNA /CNT=20 /TID=Hs.14376.1 /TIER=FL /STK=0 /UG=Hs.14376 /LL=71 /UG_GENE=ACTG1 /DEF=Homo sapiens, actin, gamma 1, clone MGC:3728, mRNA, complete cds. /PROD=actin, gamma 1 /FL=gb:BC001920.1
PATL1	244342_at	0.0329847	0.000537458	-1.15246	-0.204712	1.15246	down	1.0304	0.0432086	1.0304	up	-1.40688	-0.492503	1.40688	down	-1.21211	-0.277518	1.21211	down	219988	Hs.591960	gb:BF508025 /DB_XREF=gi:11591323 /DB_XREF=UI-H-BI4-apw-g-05-0-UI.s1 /CLONE=IMAGE:3089072 /FEA=EST /CNT=4 /TID=Hs.293816.2 /TIER=ConsEnd /STK=3 /UG=Hs.293816 /UG_TITLE=ESTs
CCDC30	221171_at	0.0329847	0.000538	-1.08149	-0.113018	1.08149	down	1.2686	0.343232	1.2686	up	1.11981	0.163255	1.11981	up	1.00831	0.0119448	1.00831	up	728621		gb:NM_025030.1 /DB_XREF=gi:13376553 /GEN=FLJ20972 /FEA=FLmRNA /CNT=2 /TID=Hs.287644.0 /TIER=FL /STK=0 /UG=Hs.287644 /LL=80098 /DEF=Homo sapiens hypothetical protein FLJ20972 (FLJ20972), mRNA. /PROD=hypothetical protein FLJ20972 /FL=gb:NM_025030.1
MAVS	226495_at	0.0329847	0.000538396	-1.17637	-0.234344	1.17637	down	1.57008	0.65084	1.57008	up	1.906	0.930546	1.906	up	1.39239	0.477564	1.39239	up	57506	Hs.570362	gb:BE727883 /DB_XREF=gi:10141875 /DB_XREF=601564286F1 /CLONE=IMAGE:3833996 /FEA=EST /CNT=41 /TID=Hs.183669.0 /TIER=Stack /STK=14 /UG=Hs.183669 /LL=57506 /UG_GENE=KIAA1271 /UG_TITLE=KIAA1271 protein
TOP1	208900_s_at	0.0329847	0.000539324	-1.67564	-0.744716	1.67564	down	-1.71028	-0.774235	1.71028	down	-2.48951	-1.31586	2.48951	down	-1.35843	-0.441937	1.35843	down	7150	Hs.472737	gb:AW025108 /DB_XREF=gi:5878638 /DB_XREF=wu71f09.x1 /CLONE=IMAGE:2525513 /FEA=FLmRNA /CNT=211 /TID=Hs.317.0 /TIER=Stack /STK=8 /UG=Hs.317 /LL=7150 /UG_GENE=TOP1 /UG_TITLE=topoisomerase (DNA) I /FL=gb:J03250.1 gb:NM_003286.1
	239274_at	0.0329847	0.000540067	-1.63569	-0.709903	1.63569	down	3.02651	1.59766	3.02651	up	-1.5343	-0.617584	1.5343	down	-1.60727	-0.684614	1.60727	down		Hs.656225	gb:AV729557 /DB_XREF=gi:10838978 /DB_XREF=AV729557 /CLONE=HTCCHG09 /FEA=EST /CNT=9 /TID=Hs.163893.0 /TIER=ConsEnd /STK=4 /UG=Hs.163893 /UG_TITLE=ESTs, Moderately similar to ALU7_HUMAN ALU SUBFAMILY SQ SEQUENCE CONTAMINATION WARNING ENTRY (H.sapiens)
SLC19A1	209777_s_at	0.0329847	0.000540564	-1.02612	-0.0372025	1.02612	down	1.72146	0.783633	1.72146	up	1.58061	0.660481	1.58061	up	1.74869	0.806271	1.74869	up	6573	Hs.84190	gb:AF004354.1 /DB_XREF=gi:2209134 /FEA=FLmRNA /CNT=73 /TID=Hs.84190.1 /TIER=FL /STK=0 /UG=Hs.84190 /LL=6573 /UG_GENE=SLC19A1 /DEF=Homo sapiens folate carrier mRNA, complete cds. /PROD=folate carrier /FL=gb:AF004354.1 gb:U19720.1 gb:U15939.1 gb:U17566.1 gb:NM_003056.1
	238040_at	0.0329847	0.000540793	-1.3319	-0.41349	1.3319	down	-1.19849	-0.261215	1.19849	down	-1.906	-0.930545	1.906	down	-2.67466	-1.41935	2.67466	down		Hs.659412	gb:AW966903 /DB_XREF=gi:8156739 /DB_XREF=EST378977 /FEA=EST /CNT=15 /TID=Hs.215658.0 /TIER=ConsEnd /STK=0 /UG=Hs.215658 /UG_TITLE=ESTs
NFS1	1554321_a_at	0.0329847	0.000541235	-1.13435	-0.181863	1.13435	down	-1.0504	-0.0709455	1.0504	down	1.03529	0.0500355	1.03529	up	1.2838	0.360424	1.2838	up	9054	Hs.194692	gb:BC018471.1 /DB_XREF=gi:17391108 /TID=Hs2.194692.2 /CNT=4 /FEA=FLmRNA /TIER=FL /STK=2 /LL=9054 /UG_GENE=NFS1 /UG=Hs.194692 /DEF=Homo sapiens, Similar to nitrogen fixation gene 1 (S. cerevisiae, homolog), clone MGC:21292 IMAGE:4708433, mRNA, complete cds. /PROD=Similar to nitrogen fixation gene 1 (S.cerevisiae, homolog) /FL=gb:BC018471.1
	1559949_at	0.0329847	0.000542253	1.02389	0.0340549	1.02389	up	1.80486	0.851885	1.80486	up	-1.03987	-0.0563962	1.03987	down	-1.04135	-0.0584504	1.04135	down		Hs.684627	gb:T56980 /DB_XREF=gi:658841 /DB_XREF=ya84a05.s2 /CLONE=IMAGE:68336 /TID=Hs2.401226.1 /CNT=4 /FEA=mRNA /TIER=ConsEnd /STK=0 /UG=Hs.401226 /UG_TITLE=Homo sapiens full length insert cDNA clone YA84A05
JUN	213281_at	0.0329847	0.000542355	-1.02079	-0.0296813	1.02079	down	-2.09654	-1.06801	2.09654	down	-2.3433	-1.22854	2.3433	down	-3.3171	-1.72992	3.3171	down	3725	Hs.696684	gb:BE327172 /DB_XREF=gi:9200948 /DB_XREF=hw08a05.x1 /CLONE=IMAGE:3182288 /FEA=EST /CNT=104 /TID=Hs.78465.1 /TIER=Stack /STK=91 /UG=Hs.78465 /LL=3725 /UG_GENE=JUN /UG_TITLE=v-jun avian sarcoma virus 17 oncogene homolog
APOBEC3G	204205_at	0.0330831	0.000544957	1.32564	0.406688	1.32564	up	-2.23261	-1.15873	2.23261	down	-1.64137	-0.714903	1.64137	down	-2.05521	-1.03928	2.05521	down	60489	Hs.660143	gb:NM_021822.1 /DB_XREF=gi:13399303 /GEN=MDS019 /FEA=FLmRNA /CNT=76 /TID=Hs.250619.0 /TIER=FL+Stack /STK=32 /UG=Hs.250619 /LL=60489 /DEF=Homo sapiens phorbolin-like protein MDS019 (MDS019), mRNA. /PROD=phorbolin-like protein MDS019 /FL=gb:AF182420.1 gb:NM_021822.1
GAPDH	AFFX-HUMGAPDH/M33197_M_at	0.0330831	0.000545184	-1.02482	-0.0353736	1.02482	down	1.65502	0.726847	1.65502	up	1.40353	0.489055	1.40353	up	1.77088	0.824466	1.77088	up	2597	Hs.544577	H. sapiens /GEN=GAPD /DB_XREF=gb:M33197.1 /NOTE=SIF corresponding to nucleotides 493-832 of gb:M33197.1 /DEF=Human glyceraldehyde-3-phosphate dehydrogenase (GAPDH) mRNA, complete cds.
HUS1	204883_s_at	0.0331623	0.000547095	1.13216	0.179073	1.13216	up	-1.07286	-0.101468	1.07286	down	-1.46481	-0.550717	1.46481	down	1.06464	0.0903677	1.06464	up	3364	Hs.152983	gb:AI968626 /DB_XREF=gi:5765444 /DB_XREF=wt90g10.x1 /CLONE=IMAGE:2514786 /FEA=FLmRNA /CNT=42 /TID=Hs.152983.0 /TIER=Stack /STK=15 /UG=Hs.152983 /LL=3364 /UG_GENE=HUS1 /UG_TITLE=HUS1 (S. pombe) checkpoint homolog /FL=gb:AF110393.1 gb:AF076844.1 gb:NM_004507.1
DNAJC7	1556053_at	0.0331755	0.000547918	-1.04459	-0.0629404	1.04459	down	1.26347	0.337391	1.26347	up	-1.02131	-0.030419	1.02131	down	-1.67246	-0.741969	1.67246	down	7266		gb:AL556987 /DB_XREF=gi:12900158 /DB_XREF=AL556987 /CLONE=CS0DH005YP22 (5 prime) /TID=Hs2.401839.1 /CNT=17 /FEA=mRNA /TIER=Stack /STK=10 /UG=Hs.401839 /UG_TITLE=Homo sapiens mRNA; cDNA DKFZp667B1424 (from clone DKFZp667B1424)
	1559696_at	0.0332448	0.000549672	-1.21464	-0.280523	1.21464	down	-1.21672	-0.282997	1.21672	down	1.1508	0.202639	1.1508	up	-1.33235	-0.413978	1.33235	down		Hs.722442	gb:AF086027.1 /DB_XREF=gi:3483372 /TID=Hs2.269011.1 /CNT=5 /FEA=mRNA /TIER=ConsEnd /STK=0 /UG=Hs.269011 /UG_TITLE=Homo sapiens full length insert cDNA clone YW24B11 /DEF=Homo sapiens full length insert cDNA clone YW24B11.
ADAM22	1555024_at	0.0333784	0.000552491	1.0621	0.0869224	1.0621	up	1.14412	0.194241	1.14412	up	1.04056	0.0573668	1.04056	up	-1.00111	-0.00159592	1.00111	down	53616	Hs.256398	gb:BC036029.1 /DB_XREF=gi:23273565 /TID=Hs2.396936.1 /CNT=2 /FEA=FLmRNA /TIER=FL /STK=1 /UG=Hs.396936 /DEF=Homo sapiens, Similar to a disintegrin and metalloproteinase domain 22, clone MGC:33113 IMAGE:5278621, mRNA, complete cds. /PROD=Similar to a disintegrin and metalloproteinasedomain 22 /FL=gb:BC036029.1
JAK3	207187_at	0.0334226	0.000553833	-1.1355	-0.183333	1.1355	down	1.25268	0.32502	1.25268	up	-1.10613	-0.14552	1.10613	down	1.58562	0.665051	1.58562	up	3718	Hs.515247	gb:NM_000215.1 /DB_XREF=gi:4557680 /GEN=JAK3 /FEA=FLmRNA /CNT=11 /TID=Hs.99877.0 /TIER=FL /STK=0 /UG=Hs.99877 /LL=3718 /DEF=Homo sapiens Janus kinase 3 (a protein tyrosine kinase, leukocyte) (JAK3), mRNA. /PROD=Janus kinase 3 /FL=gb:U09607.1 gb:NM_000215.1
PTGIR	1563431_x_at	0.0334315	0.000554593	1.11422	0.156028	1.11422	up	-1.14409	-0.194203	1.14409	down	-1.77936	-0.83136	1.77936	down	-2.12582	-1.08802	2.12582	down	5739		gb:AA807959 /DB_XREF=gi:2877365 /DB_XREF=nu90h08.s1 /CLONE=IMAGE:1218015 /TID=Hs2.407400.1 /CNT=2 /FEA=mRNA /TIER=ConsEnd /STK=0 /UG=Hs.407400 /UG_TITLE=Human HepG2 3 region MboI cDNA, clone hmd4f09m3.
NGDN	213794_s_at	0.0334323	0.000555217	1.04921	0.0693013	1.04921	up	-1.86286	-0.89752	1.86286	down	-1.43133	-0.517356	1.43133	down	-1.35167	-0.434739	1.35167	down	25983	Hs.9043	gb:AI269117 /DB_XREF=gi:3888284 /DB_XREF=qj73e04.x1 /CLONE=IMAGE:1865118 /FEA=EST /CNT=22 /TID=Hs.9043.0 /TIER=Stack /STK=13 /UG=Hs.9043 /LL=25983 /UG_GENE=DKFZP564O092 /UG_TITLE=DKFZP564O092 protein
SP1	224754_at	0.0334367	0.000555987	1.09722	0.133857	1.09722	up	1.95481	0.967026	1.95481	up	1.37114	0.455374	1.37114	up	1.11992	0.163394	1.11992	up	6667	Hs.649191	gb:BG431266 /DB_XREF=gi:13337772 /DB_XREF=602499836F1 /CLONE=IMAGE:4613433 /FEA=mRNA /CNT=201 /TID=Hs.9460.0 /TIER=Stack /STK=50 /UG=Hs.9460 /UG_TITLE=Homo sapiens mRNA; cDNA DKFZp547C244 (from clone DKFZp547C244)
SNX17	200991_s_at	0.0334367	0.000557051	1.02025	0.0289261	1.02025	up	1.36474	0.448621	1.36474	up	1.53335	0.616687	1.53335	up	1.49373	0.578921	1.49373	up	9784	Hs.278569	gb:NM_014748.1 /DB_XREF=gi:7661889 /GEN=KIAA0064 /FEA=FLmRNA /CNT=320 /TID=Hs.278569.0 /TIER=FL+Stack /STK=73 /UG=Hs.278569 /LL=9784 /DEF=Homo sapiens KIAA0064 gene product (KIAA0064), mRNA. /PROD=KIAA0064 gene product /FL=gb:BC002610.1 gb:BC002524.1 gb:D31764.1 gb:NM_014748.1
NUB1	1569030_s_at	0.0334367	0.000557125	1.09304	0.128347	1.09304	up	-2.35609	-1.2364	2.35609	down	-2.22497	-1.15378	2.22497	down	-2.00918	-1.0066	2.00918	down	51667	Hs.647082	gb:BC034716.1 /DB_XREF=gi:21961593 /TID=Hs2.380685.2 /CNT=13 /FEA=mRNA /TIER=ConsEnd /STK=0 /UG=Hs.380685 /UG_TITLE=Homo sapiens cDNA: FLJ22780 fis, clone KAIA1760. /DEF=Homo sapiens, Similar to NEDD8 ultimate buster-1, clone IMAGE:4753678, mRNA.
DAGLB	225828_at	0.0334923	0.000558665	-1.21134	-0.276605	1.21134	down	1.03236	0.0459435	1.03236	up	1.07126	0.0993096	1.07126	up	1.48766	0.573047	1.48766	up	221955	Hs.487498	gb:AI640492 /DB_XREF=gi:4703601 /DB_XREF=wa27f11.x1 /CLONE=IMAGE:2299341 /FEA=EST /CNT=60 /TID=Hs.131899.1 /TIER=Stack /STK=20 /UG=Hs.131899 /UG_TITLE=ESTs, Weakly similar to T00370 hypothetical protein KIAA0659 (H.sapiens)
LSM8	219119_at	0.0335253	0.000559828	1.12899	0.175036	1.12899	up	-1.62749	-0.702645	1.62749	down	-1.45929	-0.54527	1.45929	down	-1.38099	-0.465703	1.38099	down	51691	Hs.655046	gb:NM_016200.1 /DB_XREF=gi:7706424 /GEN=LOC51691 /FEA=FLmRNA /CNT=40 /TID=Hs.241578.0 /TIER=FL+Stack /STK=16 /UG=Hs.241578 /LL=51691 /DEF=Homo sapiens U6 snRNA-associated Sm-like protein LSm8 (LOC51691), mRNA. /PROD=U6 snRNA-associated Sm-like protein LSm8 /FL=gb:NM_016200.1 gb:BC002742.1 gb:AF182294.1
ZCCHC2	219062_s_at	0.0335581	0.000561793	1.37198	0.456258	1.37198	up	-3.23345	-1.69307	3.23345	down	-3.38321	-1.75839	3.38321	down	-2.54938	-1.35015	2.54938	down	54877	Hs.114191	gb:NM_017742.1 /DB_XREF=gi:8923259 /GEN=FLJ20281 /FEA=FLmRNA /CNT=70 /TID=Hs.18800.0 /TIER=FL+Stack /STK=16 /UG=Hs.18800 /LL=54877 /DEF=Homo sapiens hypothetical protein FLJ20281 (FLJ20281), mRNA. /PROD=hypothetical protein FLJ20281 /FL=gb:NM_017742.1
PIK3C2A	1569021_at	0.0335581	0.000562406	1.02254	0.0321567	1.02254	up	-1.06062	-0.0849111	1.06062	down	-1.17629	-0.234244	1.17629	down	-1.09416	-0.129819	1.09416	down	5286	Hs.175343	gb:BC040952.1 /DB_XREF=gi:26454884 /TID=Hs2.249235.2 /CNT=11 /FEA=mRNA /TIER=ConsEnd /STK=0 /LL=5286 /UG_GENE=PIK3C2A /UG=Hs.249235 /UG_TITLE=phosphoinositide-3-kinase, class 2, alpha polypeptide /DEF=Homo sapiens, Similar to phosphoinositide-3-kinase, class 2, alpha polypeptide, clone IMAGE:5179260, mRNA.
CREB5	205931_s_at	0.0335581	0.000562531	2.41215	1.27032	2.41215	up	8.04187	3.00753	8.04187	up	3.94118	1.97863	3.94118	up	4.56423	2.19037	4.56423	up	9586	Hs.437075	gb:NM_004904.1 /DB_XREF=gi:4758499 /GEN=H_GS165L15.1 /FEA=FLmRNA /CNT=25 /TID=Hs.149.0 /TIER=FL+Stack /STK=12 /UG=Hs.149 /LL=9586 /DEF=Homo sapiens cAMP response element-binding protein CRE-BPa (H_GS165L15.1), mRNA. /PROD=cAMP response element-binding protein CRE-BPa /FL=gb:NM_004904.1 gb:L05911.1
RBFOX1	1553422_s_at	0.0335581	0.00056283	-1.26429	-0.338326	1.26429	down	-1.15136	-0.203335	1.15136	down	1.2117	0.277034	1.2117	up	1.03927	0.0555693	1.03927	up	54715	Hs.459842	gb:NM_145892.1 /DB_XREF=gi:22538406 /GEN=A2BP1 /TID=Hs2.57937.4 /CNT=2 /FEA=FLmRNA /TIER=FL /STK=1 /LL=54715 /UG=Hs.57937 /DEF=Homo sapiens ataxin 2-binding protein 1 (A2BP1), transcript variant 2, mRNA. /PROD=ataxin 2-binding protein 1 isoform 2 /FL=gb:NM_145892.1 gb:AF094849.1
EIF4EBP2	224645_at	0.0337653	0.000567112	1.06134	0.0858904	1.06134	up	1.32304	0.403855	1.32304	up	1.61113	0.688072	1.61113	up	2.02126	1.01525	2.02126	up	1979	Hs.621200	gb:BG106477 /DB_XREF=gi:12600323 /DB_XREF=602289869F1 /CLONE=IMAGE:4384624 /FEA=mRNA /CNT=225 /TID=Hs.5233.0 /TIER=Stack /STK=29 /UG=Hs.5233 /UG_TITLE=Homo sapiens cDNA FLJ11074 fis, clone PLACE1005027
YY1	201901_s_at	0.0337653	0.000567856	1.08754	0.12107	1.08754	up	1.46777	0.553624	1.46777	up	-1.54552	-0.628094	1.54552	down	-1.09482	-0.1307	1.09482	down	7528	Hs.388927	gb:Z14077.1 /DB_XREF=gi:38010 /FEA=FLmRNA /CNT=369 /TID=Hs.97496.0 /TIER=Stack /STK=12 /UG=Hs.97496 /LL=7528 /UG_GENE=YY1 /DEF=H.sapiens mRNA for YY1NF-E1 protein. /PROD=YY1 NF-E1 /FL=gb:NM_003403.2 gb:M77698.1 gb:M76541.1
	240314_at	0.0337653	0.000568388	-1.86185	-0.896739	1.86185	down	1.61031	0.687336	1.61031	up	-2.3769	-1.24908	2.3769	down	-2.68857	-1.42684	2.68857	down		Hs.658594	gb:AI018235 /DB_XREF=gi:3232754 /DB_XREF=ou19e03.x1 /CLONE=IMAGE:1626748 /FEA=EST /CNT=5 /TID=Hs.59529.0 /TIER=ConsEnd /STK=4 /UG=Hs.59529 /UG_TITLE=ESTs, Moderately similar to ALU1_HUMAN ALU SUBFAMILY J SEQUENCE CONTAMINATION WARNING ENTRY (H.sapiens)
FAM129A	217966_s_at	0.0337653	0.00056961	2.19501	1.13423	2.19501	up	6.07425	2.60271	6.07425	up	1.68542	0.753109	1.68542	up	1.81353	0.8588	1.81353	up	116496	Hs.518662	gb:NM_022083.1 /DB_XREF=gi:11545796 /GEN=NIBAN /FEA=FLmRNA /CNT=189 /TID=Hs.48778.0 /TIER=FL /STK=5 /UG=Hs.48778 /LL=63911 /DEF=Homo sapiens niban protein (NIBAN), mRNA. /PROD=niban protein /FL=gb:AF288391.1 gb:AB050477.1 gb:NM_022083.1
CAT	211922_s_at	0.0337653	0.000569836	1.04704	0.0663185	1.04704	up	1.96393	0.973747	1.96393	up	1.79039	0.840271	1.79039	up	2.19968	1.13729	2.19968	up	847	Hs.502302	gb:AY028632.1 /DB_XREF=gi:13562131 /GEN=CAT /FEA=FLmRNA /CNT=1 /TID=HsAffx.900670.1114 /TIER=FL /STK=0 /DEF=Homo sapiens catalase (CAT) mRNA, complete cds. /PROD=catalase /FL=gb:AY028632.1
COX7A2	201597_at	0.0337653	0.000570012	1.0265	0.0377347	1.0265	up	-1.6304	-0.705228	1.6304	down	-1.62868	-0.703704	1.62868	down	-1.4431	-0.529176	1.4431	down	1347	Hs.70312	gb:NM_001865.1 /DB_XREF=gi:4502988 /GEN=COX7A2 /FEA=FLmRNA /CNT=242 /TID=Hs.70312.0 /TIER=FL+Stack /STK=105 /UG=Hs.70312 /LL=1347 /DEF=Homo sapiens cytochrome c oxidase subunit VIIa polypeptide 2 (liver) (COX7A2), nuclear gene encoding mitochondrial protein, mRNA. /PROD=cytochrome c oxidase subunit VIIa polypeptide 2(liver) /FL=gb:NM_001865.1
FAM168B	229946_at	0.0338281	0.00057169	1.01865	0.0266596	1.01865	up	-1.03381	-0.0479685	1.03381	down	-1.29012	-0.367504	1.29012	down	1.483	0.568522	1.483	up	130074	Hs.534679	gb:BF056651 /DB_XREF=gi:10810635 /DB_XREF=7k20g10.x1 /CLONE=IMAGE:3476155 /FEA=EST /CNT=17 /TID=Hs.79078.1 /TIER=Stack /STK=8 /UG=Hs.79078 /LL=4085 /UG_GENE=MAD2L1 /UG_TITLE=MAD2 (mitotic arrest deficient, yeast, homolog)-like 1
LARP4B	214216_s_at	0.0338685	0.000572992	-1.20471	-0.268683	1.20471	down	1.12016	0.163709	1.12016	up	-1.03899	-0.0551788	1.03899	down	1.52357	0.607457	1.52357	up	23185	Hs.159069	gb:AW628686 /DB_XREF=gi:7375566 /DB_XREF=hi42e08.x1 /CLONE=IMAGE:2974982 /FEA=EST /CNT=39 /TID=Hs.78851.1 /TIER=ConsEnd /STK=0 /UG=Hs.78851 /LL=23185 /UG_GENE=KIAA0217 /UG_TITLE=KIAA0217 protein
CAT	201432_at	0.0341675	0.000578676	1.15653	0.209807	1.15653	up	2.08903	1.06284	2.08903	up	1.87386	0.90601	1.87386	up	2.09695	1.06829	2.09695	up	847	Hs.502302	gb:NM_001752.1 /DB_XREF=gi:4557013 /GEN=CAT /FEA=FLmRNA /CNT=321 /TID=Hs.76359.0 /TIER=FL+Stack /STK=53 /UG=Hs.76359 /LL=847 /DEF=Homo sapiens catalase (CAT), mRNA. /PROD=catalase /FL=gb:NM_001752.1
SRP72	208095_s_at	0.0343117	0.000581746	1.04754	0.0670081	1.04754	up	-2.04893	-1.03487	2.04893	down	-2.05218	-1.03716	2.05218	down	-1.81931	-0.863395	1.81931	down	6731	Hs.237825	gb:NM_001222.1 /DB_XREF=gi:4502554 /GEN=CAMK2G /FEA=FLmRNA /CNT=2 /TID=Hs.250857.0 /TIER=FL /STK=0 /UG=Hs.250857 /LL=818 /DEF=Homo sapiens calciumcalmodulin-dependent protein kinase (CaM kinase) II gamma (CAMK2G), mRNA. /PROD=calciumcalmodulin-dependent protein kinase (CaMkinase) II gamma /FL=gb:U81554.1 gb:NM_001222.1
DDB1	208619_at	0.0343865	0.000583643	1.12969	0.175931	1.12969	up	1.26043	0.333913	1.26043	up	1.59536	0.673882	1.59536	up	1.31606	0.396225	1.31606	up	1642	Hs.290758	gb:L40326.1 /DB_XREF=gi:695361 /FEA=FLmRNA /CNT=479 /TID=Hs.108327.0 /TIER=FL /STK=0 /UG=Hs.108327 /LL=1642 /UG_GENE=DDB1 /DEF=Homo sapiens Hepatitis B virus X-associated protein 1 mRNA, complete cds. /PROD=X-associated protein 1 /FL=gb:U18299.1 gb:L40326.1 gb:U32986.1 gb:NM_001923.2
SLC12A9	220371_s_at	0.0344823	0.000586067	-1.0545	-0.076557	1.0545	down	1.564	0.645242	1.564	up	1.47856	0.564197	1.47856	up	1.47025	0.556066	1.47025	up	56996	Hs.521087	gb:NM_020246.1 /DB_XREF=gi:9910385 /GEN=LOC56996 /FEA=FLmRNA /CNT=9 /TID=Hs.119178.0 /TIER=FL /STK=0 /UG=Hs.119178 /LL=56996 /DEF=Homo sapiens cation-chloride cotransporter-interacting protein (LOC56996), mRNA. /PROD=cation-chloride cotransporter-interactingprotein /FL=gb:NM_020246.1 gb:AF284422.1 gb:AB033284.1
LINC01425	1561029_at	0.0344823	0.000586946	-1.0003	-0.000427403	1.0003	down	1.35413	0.437371	1.35413	up	1.16276	0.21755	1.16276	up	1.08853	0.122384	1.08853	up	101927821	Hs.334181	gb:BC035642.1 /DB_XREF=gi:23273452 /TID=Hs2.334181.1 /CNT=2 /FEA=mRNA /TIER=ConsEnd /STK=2 /UG=Hs.334181 /UG_TITLE=Homo sapiens, clone IMAGE:5547749, mRNA /DEF=Homo sapiens, clone IMAGE:5547749, mRNA.
UACA	236715_x_at	0.0344823	0.000588087	-1.22414	-0.291763	1.22414	down	-1.02823	-0.0401586	1.02823	down	-1.27213	-0.347246	1.27213	down	-1.62585	-0.701198	1.62585	down	55075	Hs.108049	gb:BF056139 /DB_XREF=gi:10810025 /DB_XREF=7j87d07.x1 /CLONE=IMAGE:3393421 /FEA=EST /CNT=5 /TID=Hs.53810.0 /TIER=ConsEnd /STK=5 /UG=Hs.53810 /UG_TITLE=ESTs, Moderately similar to ALU6_HUMAN ALU SUBFAMILY SP SEQUENCE CONTAMINATION WARNING ENTRY (H.sapiens)
ACOX1	227962_at	0.0344823	0.000588293	1.35547	0.438797	1.35547	up	2.27755	1.18748	2.27755	up	2.38563	1.25437	2.38563	up	2.12024	1.08423	2.12024	up	51	Hs.464137	gb:BF435852 /DB_XREF=gi:11448167 /DB_XREF=nab42g02.x1 /CLONE=IMAGE:3268778 /FEA=EST /CNT=23 /TID=Hs.293649.0 /TIER=Stack /STK=9 /UG=Hs.293649 /UG_TITLE=ESTs
CR1	208488_s_at	0.0344823	0.000588422	1.05908	0.0828174	1.05908	up	2.95945	1.56533	2.95945	up	2.35996	1.23876	2.35996	up	3.46209	1.79164	3.46209	up	1378	Hs.334019	gb:NM_000651.1 /DB_XREF=gi:10834995 /GEN=CR1 /FEA=FLmRNA /CNT=2 /TID=Hs.193716.1 /TIER=FL /STK=0 /UG=Hs.193716 /LL=1378 /DEF=Homo sapiens complement component (3b4b) receptor 1, including Knops blood group system (CR1), mRNA. /PROD=complement component (3b4b) receptor 1,including Knops blood group system /FL=gb:NM_000651.1
NFYC	202216_x_at	0.0344858	0.000589113	1.00349	0.0050191	1.00349	up	1.44311	0.529179	1.44311	up	1.34042	0.422689	1.34042	up	1.91078	0.934159	1.91078	up	4802	Hs.713051	gb:BC005003.1 /DB_XREF=gi:13436472 /FEA=FLmRNA /CNT=172 /TID=Hs.168157.0 /TIER=FL+Stack /STK=27 /UG=Hs.168157 /LL=4802 /UG_GENE=NFYC /DEF=Homo sapiens, nuclear transcription factor Y, gamma, clone MGC:792, mRNA, complete cds. /PROD=nuclear transcription factor Y, gamma /FL=gb:D89986.1 gb:D85425.1 gb:BC005003.1 gb:NM_014223.2
UFM1	222502_s_at	0.0344878	0.000589778	1.02987	0.0424689	1.02987	up	-1.07061	-0.0984387	1.07061	down	-1.21254	-0.278032	1.21254	down	2.0822	1.05811	2.0822	up	51569	Hs.643655	gb:BC005193.1 /DB_XREF=gi:13528782 /FEA=FLmRNA /CNT=158 /TID=Hs.5862.0 /TIER=FL /STK=1 /UG=Hs.5862 /LL=51569 /UG_GENE=BM-002 /DEF=Homo sapiens, hypothetical protein, clone MGC:12198, mRNA, complete cds. /PROD=hypothetical protein /FL=gb:NM_016617.1 gb:AF208844.1 gb:BC005193.1
TMEM259	212574_x_at	0.0346135	0.000593439	1.03246	0.0460812	1.03246	up	1.42117	0.507077	1.42117	up	1.27904	0.355065	1.27904	up	3.15868	1.65932	3.15868	up	91304	Hs.515003	gb:AC004528 /DB_XREF=gi:3025444 /FEA=DNA_2 /CNT=185 /TID=Hs.280666.1 /TIER=ConsEnd /STK=0 /UG=Hs.280666 /UG_TITLE=Homo sapiens chromosome 19, cosmid R32184 /DEF=Homo sapiens chromosome 19, cosmid R32184
RABGGTB	209180_at	0.0346135	0.00059385	1.01275	0.0182751	1.01275	up	-2.08886	-1.06271	2.08886	down	-1.59363	-0.672313	1.59363	down	-1.48999	-0.575298	1.48999	down	5876	Hs.78948	gb:U49245.1 /DB_XREF=gi:1216503 /FEA=FLmRNA /CNT=174 /TID=Hs.78948.0 /TIER=FL+Stack /STK=72 /UG=Hs.78948 /LL=5876 /UG_GENE=RABGGTB /DEF=Human geranylgeranyl transferase type II beta-subunit mRNA, complete cds. /PROD=geranylgeranyl transferase type II beta-subunit /FL=gb:U49245.1 gb:NM_004582.1
C20orf194	225825_at	0.0346135	0.000595477	1.04264	0.0602473	1.04264	up	1.85142	0.88863	1.85142	up	1.526	0.609753	1.526	up	1.23841	0.308488	1.23841	up	25943	Hs.516853	gb:AL110249.1 /DB_XREF=gi:5817199 /GEN=DKFZp434N061 /FEA=mRNA /CNT=68 /TID=Hs.119021.0 /TIER=Stack /STK=33 /UG=Hs.119021 /LL=26013 /DEF=Homo sapiens mRNA; cDNA DKFZp434N061 (from clone DKFZp434N061); partial cds. /PROD=hypothetical protein
AKT3	219393_s_at	0.0346135	0.000595619	-1.03185	-0.0452355	1.03185	down	1.26317	0.337043	1.26317	up	1.20052	0.263661	1.20052	up	1.28258	0.359044	1.28258	up	10000	Hs.498292	gb:NM_005465.1 /DB_XREF=gi:4885548 /GEN=AKT3 /FEA=FLmRNA /CNT=33 /TID=Hs.278582.0 /TIER=FL /STK=0 /UG=Hs.278582 /LL=10000 /DEF=Homo sapiens v-akt murine thymoma viral oncogene homolog 3 (protein kinase B, gamma) (AKT3), mRNA. /PROD=v-akt murine thymoma viral oncogene homolog 3(protein kinase B, gamma) /FL=gb:AF135794.1 gb:NM_005465.1 gb:AF124141.1
KDELR1	1555575_a_at	0.0346135	0.000596525	1.19602	0.25824	1.19602	up	1.50004	0.585003	1.50004	up	1.74514	0.803346	1.74514	up	1.77439	0.827326	1.77439	up	10945	Hs.515515	gb:BC008958.1 /DB_XREF=gi:14286313 /TID=Hs2.78040.2 /CNT=1 /FEA=FLmRNA /TIER=FL /STK=1 /LL=10945 /UG_GENE=KDELR1 /UG=Hs.78040 /DEF=Homo sapiens, Similar to KDEL (Lys-Asp-Glu-Leu) endoplasmic reticulum protein retention receptor 1, clone MGC:4023 IMAGE:3009767, mRNA, complete cds. /PROD=Similar to KDEL (Lys-Asp-Glu-Leu) endoplasmicreticulum protein retention receptor 1 /FL=gb:BC008958.1
RAD51L3-RFFL///RFFL	1552649_a_at	0.0346135	0.000596747	-1.14366	-0.193662	1.14366	down	-1.09494	-0.130857	1.09494	down	1.01066	0.0152942	1.01066	up	1.68004	0.748498	1.68004	up	117584///100529207	Hs.13680	gb:NM_057178.1 /DB_XREF=gi:17432432 /GEN=LOC117584 /TID=Hs2.172694.1 /CNT=19 /FEA=FLmRNA /TIER=FL /STK=2 /LL=117584 /UG=Hs.172694 /DEF=Homo sapiens fring (LOC117584), mRNA. /PROD=fring /FL=gb:AF434816.1 gb:NM_057178.1
CEACAM8	206676_at	0.0346135	0.000597294	-1.60988	-0.686954	1.60988	down	17.9585	4.16659	17.9585	up	4.98997	2.31903	4.98997	up	37.463	5.22739	37.463	up	1088	Hs.41	gb:M33326.1 /DB_XREF=gi:189101 /GEN=NCA /FEA=FLmRNA /CNT=18 /TID=Hs.41.0 /TIER=FL /STK=2 /UG=Hs.41 /LL=1088 /DEF=Human nonspecific cross-reacting antigen (NCA) mRNA, complete cds. /PROD=non-specific cross reacting antigen /FL=gb:NM_001816.1 gb:M33326.1
ACTG1	201550_x_at	0.0346135	0.000597488	1.00089	0.00128728	1.00089	up	1.39082	0.475937	1.39082	up	1.38183	0.466577	1.38183	up	1.35467	0.437943	1.35467	up	71	Hs.514581	gb:NM_001614.2 /DB_XREF=gi:11038618 /GEN=ACTG1 /FEA=FLmRNA /CNT=466 /TID=Hs.14376.0 /TIER=FL+Stack /STK=97 /UG=Hs.14376 /LL=71 /DEF=Homo sapiens actin, gamma 1 (ACTG1), mRNA. /PROD=actin, gamma 1 propeptide /FL=gb:BC000292.1 gb:NM_001614.2
DSC2	204750_s_at	0.0346135	0.000597624	1.00889	0.0127755	1.00889	up	1.93319	0.950987	1.93319	up	1.18628	0.246448	1.18628	up	2.46065	1.29904	2.46065	up	1824	Hs.95612	gb:BF196457 /DB_XREF=gi:11084425 /DB_XREF=hr86d10.x1 /CLONE=IMAGE:3135379 /FEA=FLmRNA /CNT=51 /TID=Hs.239727.0 /TIER=Stack /STK=10 /UG=Hs.239727 /LL=1824 /UG_GENE=DSC2 /UG_TITLE=desmocollin 2 /FL=gb:NM_004949.1
THRAP3	217847_s_at	0.034656	0.000598993	-1.18586	-0.245938	1.18586	down	1.07205	0.100368	1.07205	up	-1.18206	-0.241303	1.18206	down	1.29249	0.370149	1.29249	up	9967	Hs.744057	gb:NM_005119.1 /DB_XREF=gi:4827039 /GEN=TRAP150 /FEA=FLmRNA /CNT=182 /TID=Hs.108319.0 /TIER=FL /STK=0 /UG=Hs.108319 /LL=9967 /DEF=Homo sapiens thyroid hormone receptor-associated protein, 150 kDa subunit (TRAP150), mRNA. /PROD=thyroid hormone receptor-associated protein, 150kDa subunit /FL=gb:NM_005119.1 gb:AF117756.1
	241223_x_at	0.0351682	0.000608772	-1.40606	-0.491659	1.40606	down	-1.01847	-0.0264083	1.01847	down	-1.31507	-0.395139	1.31507	down	-2.281	-1.18966	2.281	down		Hs.663897	gb:AI821721 /DB_XREF=gi:5440800 /DB_XREF=ag49b02.x5 /CLONE=IMAGE:1126251 /FEA=EST /CNT=4 /TID=Hs.289000.0 /TIER=ConsEnd /STK=4 /UG=Hs.289000 /UG_TITLE=ESTs, Weakly similar to ALU1_HUMAN ALU SUBFAMILY J SEQUENCE CONTAMINATION WARNING ENTRY (H.sapiens)
	214316_x_at	0.0351682	0.000609132	1.46416	0.550073	1.46416	up	-1.74564	-0.803754	1.74564	down	-1.67549	-0.744585	1.67549	down	-1.57165	-0.652284	1.57165	down			gb:AI378706 /DB_XREF=gi:4188559 /DB_XREF=tb91f09.x1 /CLONE=IMAGE:2061737 /FEA=EST /CNT=13 /TID=Hs.16488.3 /TIER=Stack /STK=13 /UG=Hs.16488 /LL=811 /UG_GENE=CALR /UG_TITLE=calreticulin
NADSYN1	232946_s_at	0.0352727	0.000611587	1.13648	0.184572	1.13648	up	1.44125	0.527324	1.44125	up	1.85023	0.887701	1.85023	up	1.74812	0.805808	1.74812	up	55191	Hs.556986	gb:AL512694.1 /DB_XREF=gi:12224850 /FEA=mRNA /CNT=4 /TID=Hs.307073.0 /TIER=ConsEnd /STK=0 /UG=Hs.307073 /UG_TITLE=Homo sapiens mRNA; cDNA DKFZp761J2423 (from clone DKFZp761J2423) /DEF=Homo sapiens mRNA; cDNA DKFZp761J2423 (from clone DKFZp761J2423).
	1567527_at	0.0353071	0.000612829	-1.15249	-0.204749	1.15249	down	-1.15312	-0.205548	1.15312	down	-1.24558	-0.316821	1.24558	down	-1.12676	-0.172177	1.12676	down		Hs.48444	gb:AY174161.1 /DB_XREF=gi:27652444 /TID=Hs2.435890.1 /CNT=1 /FEA=mRNA /TIER=ConsEnd /STK=0 /UG=Hs.435890 /UG_TITLE=Homo sapiens ubiquitin B (UBB) mRNA, 3 prime UTR and genetic suppressor element /DEF=Homo sapiens ubiquitin B (UBB) mRNA, 3 prime UTR and genetic suppressor element.
	240520_at	0.035346	0.000614358	-1.17241	-0.229473	1.17241	down	1.22593	0.293879	1.22593	up	1.00028	0.000406606	1.00028	up	-1.01841	-0.0263138	1.01841	down		Hs.585001	gb:AI081227 /DB_XREF=gi:3418019 /DB_XREF=ox76d08.x1 /CLONE=IMAGE:1662255 /FEA=EST /CNT=4 /TID=Hs.134589.0 /TIER=ConsEnd /STK=4 /UG=Hs.134589 /UG_TITLE=ESTs
NNT	202784_s_at	0.035346	0.000615135	1.02114	0.0301822	1.02114	up	1.27125	0.346251	1.27125	up	1.51534	0.59964	1.51534	up	2.07641	1.05409	2.07641	up	23530	Hs.482043	gb:NM_012343.1 /DB_XREF=gi:6912535 /GEN=NNT /FEA=FLmRNA /CNT=157 /TID=Hs.18136.0 /TIER=FL /STK=0 /UG=Hs.18136 /LL=23530 /DEF=Homo sapiens nicotinamide nucleotide transhydrogenase (NNT), mRNA. /PROD=nicotinamide nucleotide transhydrogenase /FL=gb:NM_012343.1 gb:U40490.1
EIF4A2	200912_s_at	0.035346	0.000615444	-1.01269	-0.0181969	1.01269	down	-1.76488	-0.81957	1.76488	down	-1.27504	-0.350537	1.27504	down	-1.33284	-0.414504	1.33284	down	1974	Hs.518475	gb:NM_001967.2 /DB_XREF=gi:9945313 /GEN=EIF4A2 /FEA=FLmRNA /CNT=344 /TID=Hs.173912.0 /TIER=FL+Stack /STK=211 /UG=Hs.173912 /LL=1974 /DEF=Homo sapiens eukaryotic translation initiation factor 4A, isoform 2 (EIF4A2), mRNA. /PROD=eukaryotic translation initiation factor 4A,isoform 2 /FL=gb:D30655.1 gb:NM_001967.2
CIR1	209571_at	0.0353959	0.00061696	1.31619	0.396371	1.31619	up	-1.44091	-0.526977	1.44091	down	-1.30028	-0.378823	1.30028	down	-1.44897	-0.535028	1.44897	down	9541	Hs.632531	gb:U03644.1 /DB_XREF=gi:476104 /GEN=recepin /FEA=FLmRNA /CNT=82 /TID=Hs.89421.0 /TIER=FL+Stack /STK=9 /UG=Hs.89421 /LL=9541 /DEF=Human recepin mRNA, complete cds. /PROD=recepin /FL=gb:U03644.1 gb:AF098297.1 gb:NM_004882.1
NLRP12	223944_at	0.0354216	0.000618056	1.26253	0.336313	1.26253	up	4.0979	2.03488	4.0979	up	3.6253	1.8581	3.6253	up	3.40433	1.76737	3.40433	up	91662	Hs.631573	gb:AF231021.1 /DB_XREF=gi:13182796 /FEA=FLmRNA /CNT=4 /TID=Hs.291042.0 /TIER=FL /STK=1 /UG=Hs.291042 /DEF=Homo sapiens leucine-rich-repeat protein RNO2 mRNA, complete cds. /PROD=leucine-rich-repeat protein RNO2 /FL=gb:AF231021.1
TRA2B	200892_s_at	0.0354225	0.000618719	-1.05652	-0.0793242	1.05652	down	-1.93613	-0.953172	1.93613	down	-1.40205	-0.487533	1.40205	down	-1.34943	-0.432348	1.34943	down	6434	Hs.533122	gb:BC000451.1 /DB_XREF=gi:12653362 /FEA=FLmRNA /CNT=321 /TID=Hs.30035.0 /TIER=FL+Stack /STK=25 /UG=Hs.30035 /LL=6434 /UG_GENE=SFRS10 /DEF=Homo sapiens, splicing factor, arginineserine-rich (transformer 2 Drosophila homolog) 10, clone MGC:8454, mRNA, complete cds. /PROD=splicing factor, arginineserine-rich(transformer 2 Drosophila homolog) 10 /FL=gb:U61267.1 gb:BC000451.1 gb:U68063.1 gb:BC000160.1…
NLRP12	1554952_s_at	0.0354467	0.000619791	1.5289	0.612489	1.5289	up	4.98036	2.31625	4.98036	up	4.65734	2.21951	4.65734	up	4.14461	2.05124	4.14461	up	91662	Hs.631573	gb:AY116207.1 /DB_XREF=gi:21711826 /TID=Hs2.367965.3 /CNT=4 /FEA=FLmRNA /TIER=FL /STK=1 /LL=91662 /UG_GENE=RNO2 /UG=Hs.367965 /DEF=Homo sapiens monarch-1 splice form IV mRNA, complete cds; alternatively spliced. /PROD=monarch-1 splice form IV /FL=gb:AY116207.1
	237878_at	0.0354614	0.000620696	-1.05517	-0.0774698	1.05517	down	1.35006	0.433022	1.35006	up	1.37523	0.459669	1.37523	up	1.15716	0.210585	1.15716	up			gb:H69555 /DB_XREF=gi:1039761 /DB_XREF=yr89f03.s1 /CLONE=IMAGE:212477 /FEA=EST /CNT=11 /TID=Hs.14165.0 /TIER=ConsEnd /STK=4 /UG=Hs.14165 /UG_TITLE=ESTs, Moderately similar to ALU5_HUMAN ALU SUBFAMILY SC SEQUENCE CONTAMINATION WARNING ENTRY (H.sapiens)
	216756_at	0.0354655	0.000621706	-1.05051	-0.0710928	1.05051	down	1.10162	0.139624	1.10162	up	-1.00048	-0.000689507	1.00048	down	-1.5467	-0.629193	1.5467	down		Hs.612892	gb:AK024995.1 /DB_XREF=gi:10437426 /FEA=mRNA /CNT=1 /TID=Hs.306739.0 /TIER=ConsEnd /STK=0 /UG=Hs.306739 /UG_TITLE=Homo sapiens cDNA: FLJ21342 fis, clone COL02673 /DEF=Homo sapiens cDNA: FLJ21342 fis, clone COL02673.
GM2A	33646_g_at	0.0354655	0.000622066	1.01935	0.0276464	1.01935	up	1.98939	0.992323	1.98939	up	1.13456	0.182136	1.13456	up	3.78989	1.92216	3.78989	up	2760	Hs.483873	Cluster Incl. X61094:H.sapiens RNA for GM2-activator protein (clone pGM2A) /cds=(0,312) /gb=X61094 /gi=31854 /ug=Hs.169293 /len=648
AMICA1	228094_at	0.0354768	0.000622913	1.39591	0.481202	1.39591	up	2.66914	1.41637	2.66914	up	2.51167	1.32865	2.51167	up	2.28536	1.19242	2.28536	up	120425	Hs.16291	gb:AL048542 /DB_XREF=gi:4727682 /DB_XREF=DKFZp586O2324_s1 /CLONE=DKFZp586O2324 /FEA=EST /CNT=21 /TID=Hs.16291.0 /TIER=Stack /STK=13 /UG=Hs.16291 /UG_TITLE=ESTs
PCBP2	229467_at	0.0354993	0.000624266	-1.15868	-0.212477	1.15868	down	1.0913	0.126047	1.0913	up	-1.34802	-0.430837	1.34802	down	-2.19712	-1.13561	2.19712	down	5094		gb:AA504356 /DB_XREF=gi:2240516 /DB_XREF=aa61h05.s1 /CLONE=IMAGE:825465 /FEA=EST /CNT=18 /TID=Hs.88650.0 /TIER=Stack /STK=12 /UG=Hs.88650 /UG_TITLE=ESTs
SEC61A1	217716_s_at	0.0354993	0.000624768	1.12376	0.168335	1.12376	up	1.17795	0.236274	1.17795	up	1.39926	0.484663	1.39926	up	1.4261	0.512078	1.4261	up	29927	Hs.518236	gb:NM_013336.1 /DB_XREF=gi:7019414 /GEN=HSEC61 /FEA=FLmRNA /CNT=482 /TID=Hs.306079.0 /TIER=FL+Stack /STK=177 /UG=Hs.306079 /LL=29927 /DEF=Homo sapiens sec61 homolog (HSEC61), mRNA. /PROD=sec61 homolog /FL=gb:AF346602.1 gb:AF084458.1 gb:NM_013336.1 gb:BC002951.1
DCLK2	216724_at	0.0354993	0.000625712	1.02882	0.0409848	1.02882	up	-1.03518	-0.0498841	1.03518	down	1.11051	0.151216	1.11051	up	-1.07281	-0.101397	1.07281	down	166614	Hs.591683	gb:AL359602.1 /DB_XREF=gi:8655670 /FEA=mRNA /CNT=1 /TID=Hs.306514.0 /TIER=ConsEnd /STK=0 /UG=Hs.306514 /UG_TITLE=Homo sapiens mRNA; cDNA DKFZp547D146 (from clone DKFZp547D146) /DEF=Homo sapiens mRNA; cDNA DKFZp547D146 (from clone DKFZp547D146).
NFIC	226377_at	0.0354993	0.000626198	1.39939	0.484794	1.39939	up	2.04376	1.03123	2.04376	up	1.69905	0.764726	1.69905	up	1.88307	0.913084	1.88307	up	4782	Hs.170131	gb:AI093722 /DB_XREF=gi:3432698 /DB_XREF=qa27h01.s1 /CLONE=IMAGE:1688017 /FEA=EST /CNT=44 /TID=Hs.77515.1 /TIER=Stack /STK=10 /UG=Hs.77515 /LL=3710 /UG_GENE=ITPR3 /UG_TITLE=inositol 1,4,5-triphosphate receptor, type 3
ISG15	205483_s_at	0.0354993	0.000628585	1.16463	0.219875	1.16463	up	-7.17917	-2.84382	7.17917	down	-5.90194	-2.56119	5.90194	down	-5.98718	-2.58188	5.98718	down	9636	Hs.458485	gb:NM_005101.1 /DB_XREF=gi:4826773 /GEN=ISG15 /FEA=FLmRNA /CNT=43 /TID=Hs.833.0 /TIER=FL+Stack /STK=16 /UG=Hs.833 /LL=9636 /DEF=Homo sapiens interferon-stimulated protein, 15 kDa (ISG15), mRNA. /PROD=interferon-stimulated protein, 15 kDa /FL=gb:M13755.1 gb:NM_005101.1
PRDX2	215067_x_at	0.0354993	0.000628898	-1.30442	-0.383406	1.30442	down	1.07884	0.109475	1.07884	up	-1.1826	-0.241963	1.1826	down	-1.71952	-0.782003	1.71952	down	7001		gb:AU147942 /DB_XREF=gi:11009463 /DB_XREF=AU147942 /CLONE=MAMMA1002198 /FEA=mRNA /CNT=7 /TID=Hs.287517.0 /TIER=ConsEnd /STK=2 /UG=Hs.287517 /UG_TITLE=Homo sapiens cDNA FLJ12333 fis, clone MAMMA1002198, highly similar to THIOREDOXIN PEROXIDASE 1
HFE	211330_s_at	0.0354993	0.000629188	1.2388	0.308941	1.2388	up	1.83704	0.877385	1.83704	up	1.69748	0.763396	1.69748	up	1.77889	0.830976	1.77889	up	3077	Hs.233325	gb:AF144242.1 /DB_XREF=gi:11094324 /GEN=HFE /FEA=FLmRNA /CNT=1 /TID=Hs.20019.5 /TIER=FL /STK=0 /UG=Hs.20019 /LL=3077 /DEF=Homo sapiens hemochromatosis splice variant delE3 mRNA, complete cds. /PROD=hemochromatosis splice variant delE3 /FL=gb:AF144242.1
ZFAND3	222493_s_at	0.0354993	0.000629519	1.16626	0.221887	1.16626	up	1.19817	0.260833	1.19817	up	1.28631	0.363242	1.28631	up	1.90146	0.927111	1.90146	up	60685	Hs.36959	gb:AW303359 /DB_XREF=gi:6713039 /DB_XREF=xv18b07.x1 /CLONE=IMAGE:2813461 /FEA=FLmRNA /CNT=203 /TID=Hs.6120.0 /TIER=Stack /STK=15 /UG=Hs.6120 /LL=60685 /UG_GENE=FLJ13222 /UG_TITLE=hypothetical protein FLJ13222 /FL=gb:NM_021943.1
IQCK	215131_at	0.0354993	0.000629604	-1.12598	-0.171186	1.12598	down	-1.00301	-0.00433657	1.00301	down	-1.16675	-0.222501	1.16675	down	-1.22866	-0.297091	1.22866	down	124152		gb:AC002550 /DB_XREF=gi:2570261 /FEA=DNA_1 /CNT=6 /TID=Hs.242407.4 /TIER=ConsEnd /STK=0 /UG=Hs.242407 /LL=51704 /UG_GENE=GPRC5B /UG_TITLE=G protein-coupled receptor, family C, group 5, member B /DEF=Human Chromosome 16 BAC clone CIT987SK-A-101F10
[truncated: 573 more rows]

## Sheet: Table S6.2
Gene Symbol	Distance-Based Similarity	[S.aureus MRSA](normalized)	[S.aureus MSSA](normalized)	[S.pneumoniae](normalized)	Entrez Gene	UniGene ID	Target Description
[truncated: 42 more rows]

## Sheet: Table S6.3
Gene Symbol	Distance-Based Similarity	[S.aureus MRSA](normalized)	[S.aureus MSSA](normalized)	[S.pneumoniae](normalized)	Entrez Gene	UniGene ID	Target Description
[truncated: 127 more rows]

## Sheet: Table S6.4
Gene Symbol	Distance-Based Similarity	[S.aureus MRSA](normalized)	[S.aureus MSSA](normalized)	[S.pneumoniae](normalized)	Entrez Gene	UniGene ID	Target Description
[truncated: 16 more rows]

[truncated: 5 more sheets: Table S6.5, Table S6.6, Table S6.7, Table S6.8, Table S6.9]
