# Supplementary material for: Development of a Bioinformatics Framework for Identification and Validation of Genomic Biomarkers and Key Immunopathology Processes and Controllers in Infectious and Non-infectious Severe Inflammatory Response Syndrome
Source: Front Immunol. 2020 Mar 31;11:380. doi: 10.3389/fimmu.2020.00380 (PMC7147506; doi:10.3389/fimmu.2020.00380)
Supplement: Supplementary Information S7 — Table S7.1: ANOVA results for dataset E-GEO 28750, ranked on significance (p-value from lowest to highest). Table S7.2: Results of similar entities analysis for CD177 using dataset E-GEO 28750. Table S7.3: Results of similar entities analysis for FGF13 using dataset E-GEO 28750. Table S7.4: Results of similar entities analysis for GPR84 using dataset E-GEO 28750. Table S7.5: Results of similar entities analysis for KLRK1 using dataset E-GEO 28750. Table S7.6: Results of similar entities analysis for MYL9 using dataset E E-GEO 28750. Table S7.7: Results of similar entities analysis for PCOLCE2 using dataset E-GEO 28750. Table S7.8: Results of similar entities analysis for SLC16A3 using dataset E-GEO 28750. Table S7.9: Results of similar entities analysis for TDRD9 using dataset E-GEO 28750. [file Table_7.xlsx]

## Sheet: Table S7.1
Gene Symbol	Probe Set ID	p (Corr)	p	FC ([Post-Surgical] vs [Healthy Control])	Log FC ([Post-Surgical] vs [Healthy Control])	FC (abs) ([Post-Surgical] vs [Healthy Control])	Regulation ([Post-Surgical] vs [Healthy Control])	FC ([Sepsis] vs [Healthy Control])	Log FC ([Sepsis] vs [Healthy Control])	FC (abs) ([Sepsis] vs [Healthy Control])	Regulation ([Sepsis] vs [Healthy Control])	[Healthy Control](normalized)	[Post-Surgical](normalized)	[Sepsis](normalized)	Entrez Gene	UniGene ID	Target Description
PLBD1	218454_at	4.6471e-12	1.6999e-16	3.36443	1.75036	3.36443	up	5.35557	2.42104	5.35557	up	-0.921074	0.829288	1.49997	79887	Hs.131933	gb:NM_024829.1 /DB_XREF=gi:13376231 /GEN=FLJ22662 /FEA=FLmRNA /CNT=105 /TID=Hs.178470.0 /TIER=FL+Stack /STK=42 /UG=Hs.178470 /LL=79887 /DEF=Homo sapiens hypothetical protein FLJ22662 (FLJ22662), mRNA. /PROD=hypothetical protein FLJ22662 /FL=gb:NM_024829.1
MCEMP1	235568_at	4.6471e-12	1.05905e-16	9.23572	3.20722	9.23572	up	37.5949	5.23247	37.5949	up	-0.835287	2.37194	4.39718	199675	Hs.709539	gb:BF433657 /DB_XREF=gi:11445846 /DB_XREF=7q64d03.x1 /CLONE=IMAGE:3702965 /FEA=EST /CNT=13 /TID=Hs.178703.0 /TIER=ConsEnd /STK=6 /UG=Hs.178703 /UG_TITLE=ESTs
S100A12	205863_at	5.22162e-12	2.86508e-16	6.22166	2.6373	6.22166	up	11.6564	3.54305	11.6564	up	-1.26575	1.37155	2.2773	6283	Hs.19413	gb:NM_005621.1 /DB_XREF=gi:5032058 /GEN=S100A12 /FEA=FLmRNA /CNT=34 /TID=Hs.19413.0 /TIER=FL+Stack /STK=12 /UG=Hs.19413 /LL=6283 /DEF=Homo sapiens S100 calcium-binding protein A12 (calgranulin C) (S100A12), mRNA. /PROD=S100 calcium-binding protein A12 /FL=gb:D83664.1 gb:D49549.1 gb:NM_005621.1
KDM7A	225142_at	1.1883e-11	8.69356e-16	2.5689	1.36115	2.5689	up	3.74648	1.90554	3.74648	up	-0.763995	0.597156	1.14154	80853	Hs.308710	gb:AW294022 /DB_XREF=gi:6700658 /DB_XREF=UI-H-BI2-ahb-c-11-0-UI.s1 /CLONE=IMAGE:2726037 /FEA=mRNA /CNT=116 /TID=Hs.222707.0 /TIER=Stack /STK=9 /UG=Hs.222707 /LL=80853 /UG_GENE=KIAA1718 /UG_TITLE=KIAA1718 protein
HP///HPR	208470_s_at	1.46687e-11	1.34144e-15	12.5507	3.64969	12.5507	up	92.2387	6.5273	92.2387	up	-1.59278	2.05691	4.93452	3240///3250	Hs.513711///Hs.655361///Hs.702099	gb:NM_020995.1 /DB_XREF=gi:10337588 /GEN=HPR /FEA=FLmRNA /CNT=12 /TID=Hs.328822.0 /TIER=FL /STK=0 /UG=Hs.328822 /LL=3250 /DEF=Homo sapiens haptoglobin-related protein (HPR), mRNA. /PROD=haptoglobin-related protein /FL=gb:NM_020995.1
CLEC4D	1552772_at	1.74499e-11	1.91494e-15	7.01379	2.81019	7.01379	up	16.6772	4.05981	16.6772	up	-1.46911	1.34108	2.5907	338339	Hs.351811	gb:NM_080387.2 /DB_XREF=gi:24475770 /GEN=CLEC-6 /TID=Hs2.351811.1 /CNT=7 /FEA=FLmRNA /TIER=FL /STK=2 /LL=121481 /UG=Hs.351811 /DEF=Homo sapiens C-type lectin-like receptor (CLEC-6), mRNA. /PROD=C-type lectin-like receptor /FL=gb:BC032313.1 gb:AF411850.1 gb:NM_080387.2
CD7	214049_x_at	2.43248e-11	3.11428e-15	-4.57286	-2.1931	4.57286	down	-4.17591	-2.06209	4.17591	down	0.902466	-1.29063	-1.15963	924	Hs.36972	gb:AI829961 /DB_XREF=gi:5450632 /DB_XREF=wj85a07.x1 /CLONE=IMAGE:2409588 /FEA=mRNA /CNT=16 /TID=Hs.36972.0 /TIER=Stack /STK=9 /UG=Hs.36972 /LL=924 /UG_GENE=CD7 /UG_TITLE=CD7 antigen (p41)
YWHAE	210996_s_at	4.01233e-11	6.60465e-15	-1.8853	-0.91479	1.8853	down	1.46299	0.54892	1.46299	up	0.0450673	-0.869723	0.593987	7531	Hs.513851	gb:U43430.1 /DB_XREF=gi:4096984 /FEA=FLmRNA /CNT=3 /TID=Hs.79474.1 /TIER=FL /STK=0 /UG=Hs.79474 /LL=7531 /UG_GENE=YWHAE /DEF=Human epsilon isoform 14-3-3 protein mRNA, complete cds. /PROD=14-3-3 protein /FL=gb:U43430.1 gb:U43399.1
CLEC4D	1552773_at	4.01233e-11	6.10441e-15	11.0663	3.46809	11.0663	up	21.3837	4.41844	21.3837	up	-1.72613	1.74197	2.69231	338339	Hs.351811	gb:BC032313.1 /DB_XREF=gi:21595254 /TID=Hs2.351811.1 /CNT=7 /FEA=FLmRNA /TIER=FL /STK=1 /LL=121481 /UG_GENE=CLEC-6 /UG=Hs.351811 /DEF=Homo sapiens, C-type lectin-like receptor, clone MGC:40078 IMAGE:5218660, mRNA, complete cds. /PROD=C-type lectin-like receptor /FL=gb:BC032313.1 gb:AF411850.1 gb:NM_080387.2
ATXN7L3B	212113_at	5.03297e-11	9.20526e-15	-10.3693	-3.37425	10.3693	down	-1.49827	-0.583297	1.49827	down	0.339699	-3.03455	-0.243598	552889	Hs.744849	gb:AI927479 /DB_XREF=gi:5663443 /DB_XREF=wo90d06.x1 /CLONE=IMAGE:2462603 /FEA=EST /CNT=230 /TID=Hs.165590.1 /TIER=Stack /STK=10 /UG=Hs.165590 /LL=6207 /UG_GENE=RPS13 /UG_TITLE=ribosomal protein S13
SNX3	200067_x_at	8.59481e-11	1.88638e-14	3.22927	1.69121	3.22927	up	4.7244	2.24013	4.7244	up	-0.578987	1.11222	1.66114	8724	Hs.12102	gb:AL078596 /DB_XREF=gi:6010168 /FEA=FLmRNA /CNT=355 /TID=Hs.12102.0 /TIER=Stack /STK=10 /UG=Hs.12102 /LL=8724 /UG_GENE=SNX3 /UG_TITLE=sorting nexin 3 /DEF=Human DNA sequence from clone RP3-429G5 on chromosome 6q21-22.1. Contains the NR2E1 gene for nuclear receptor 2E1 (tailless, TLL, TLX, XTLL), the 3 end of the SNX3 gene for sorting nexin 3, ESTs, STSs, GSSs and four predicted CpG islands /FL=g…
SNX3	210648_x_at	8.59481e-11	1.77595e-14	2.70453	1.43538	2.70453	up	4.2716	2.09478	4.2716	up	-0.51145	0.923925	1.58333	8724	Hs.12102	gb:AB047360.1 /DB_XREF=gi:12957159 /GEN=SNX 3A /FEA=FLmRNA /CNT=3 /TID=Hs.12102.1 /TIER=FL /STK=0 /UG=Hs.12102 /LL=8724 /DEF=Homo sapiens SNX 3A mRNA for sorting nexin 3A, complete cds. /PROD=sorting nexin 3A /FL=gb:AB047360.1
WDR26	224905_at	1.03345e-10	2.45721e-14	2.97257	1.57171	2.97257	up	2.64601	1.40382	2.64601	up	-0.973298	0.598412	0.430522	80232	Hs.497873	gb:AA482548 /DB_XREF=gi:2210226 /DB_XREF=zt34b03.s1 /CLONE=IMAGE:724205 /FEA=mRNA /CNT=135 /TID=Hs.5534.0 /TIER=Stack /STK=9 /UG=Hs.5534 /UG_TITLE=Homo sapiens cDNA FLJ12961 fis, clone NT2RP2005645
RAB13	202252_at	1.05237e-10	2.85865e-14	1.78825	0.838546	1.78825	up	5.47634	2.45321	5.47634	up	-0.593855	0.244691	1.85936	5872	Hs.151536	gb:NM_002870.1 /DB_XREF=gi:4506362 /GEN=RAB13 /FEA=FLmRNA /CNT=129 /TID=Hs.151536.0 /TIER=FL /STK=0 /UG=Hs.151536 /LL=5872 /DEF=Homo sapiens RAB13, member RAS oncogene family (RAB13), mRNA. /PROD=RAB13, member RAS oncogene family /FL=gb:BC000799.1 gb:NM_002870.1
HP	206697_s_at	1.05237e-10	2.88715e-14	6.95914	2.79891	6.95914	up	43.9834	5.45889	43.9834	up	-1.26287	1.53604	4.19602	3240	Hs.513711///Hs.702099	gb:NM_005143.1 /DB_XREF=gi:4826761 /GEN=HP /FEA=FLmRNA /CNT=29 /TID=Hs.75990.0 /TIER=FL /STK=0 /UG=Hs.75990 /LL=3240 /DEF=Homo sapiens haptoglobin (HP), mRNA. /PROD=haptoglobin /FL=gb:K00422.1 gb:L29394.1 gb:NM_005143.1
GAPDH	213453_x_at	1.4732e-10	4.31115e-14	1.68784	0.755181	1.68784	up	2.56967	1.36158	2.56967	up	-0.255353	0.499828	1.10623	2597	Hs.544577	gb:BF689355 /DB_XREF=gi:11974763 /DB_XREF=602184994T1 /CLONE=IMAGE:4299431 /FEA=EST /CNT=35 /TID=Hs.169476.4 /TIER=Stack /STK=8 /UG=Hs.169476 /LL=2597 /UG_GENE=GAPD /UG_TITLE=glyceraldehyde-3-phosphate dehydrogenase
CD63	200663_at	1.48782e-10	4.62606e-14	2.3947	1.25985	2.3947	up	3.78116	1.91883	3.78116	up	-0.552902	0.706943	1.36593	967	Hs.445570	gb:NM_001780.1 /DB_XREF=gi:4502678 /GEN=CD63 /FEA=FLmRNA /CNT=457 /TID=Hs.76294.0 /TIER=FL+Stack /STK=177 /UG=Hs.76294 /LL=967 /DEF=Homo sapiens CD63 antigen (melanoma 1 antigen) (CD63), mRNA. /PROD=CD63 antigen (melanoma 1 antigen) /FL=gb:BC002349.1 gb:NM_001780.1 gb:M59907.1
GAPDH	212581_x_at	2.51198e-10	8.46783e-14	1.55573	0.63759	1.55573	up	2.3535	1.23481	2.3535	up	-0.292785	0.344805	0.942022	2597	Hs.544577	gb:BE561479 /DB_XREF=gi:9805199 /DB_XREF=601346543F1 /CLONE=IMAGE:3679498 /FEA=mRNA /CNT=395 /TID=Hs.169476.1 /TIER=Stack /STK=359 /UG=Hs.169476 /LL=2597 /UG_GENE=GAPD /UG_TITLE=glyceraldehyde-3-phosphate dehydrogenase
YOD1	227309_at	2.51198e-10	9.02032e-14	5.20929	2.38109	5.20929	up	10.167	3.34582	10.167	up	-1.03096	1.35013	2.31487	55432	Hs.567533///Hs.745490	gb:AI982535 /DB_XREF=gi:5809787 /DB_XREF=wt21f07.x1 /CLONE=IMAGE:2508133 /FEA=EST /CNT=35 /TID=Hs.8688.0 /TIER=Stack /STK=10 /UG=Hs.8688 /UG_TITLE=ESTs
GRAP///GRAPL	229726_at	2.51198e-10	9.18876e-14	-5.88889	-2.558	5.88889	down	-5.93043	-2.56814	5.93043	down	1.13692	-1.42108	-1.43122	10750///400581	Hs.567416	gb:AW007479 /DB_XREF=gi:5856257 /DB_XREF=ws52c07.x1 /CLONE=IMAGE:2500812 /FEA=EST /CNT=17 /TID=Hs.143974.0 /TIER=Stack /STK=15 /UG=Hs.143974 /UG_TITLE=ESTs
CYSTM1	224707_at	2.55176e-10	9.80101e-14	4.37029	2.12773	4.37029	up	11.0026	3.45977	11.0026	up	-0.720927	1.4068	2.73884	84418	Hs.529798	gb:AL522667 /DB_XREF=gi:12786160 /DB_XREF=AL522667 /CLONE=CS0DB009YK05 (5 prime) /FEA=mRNA /CNT=167 /TID=Hs.323512.0 /TIER=Stack /STK=74 /UG=Hs.323512 /UG_TITLE=Homo sapiens mRNA for putative nuclear protein (ORF1-FL49)
GAPDH	217398_x_at	2.73058e-10	1.16504e-13	1.86423	0.898578	1.86423	up	2.37854	1.25008	2.37854	up	-0.438282	0.460296	0.811797	2597	Hs.544577	gb:AK026525.1 /DB_XREF=gi:10439402 /FEA=mRNA /CNT=1 /TID=Hs.169476.5 /TIER=ConsEnd /STK=0 /UG=Hs.169476 /LL=2597 /UG_GENE=GAPD /UG_TITLE=glyceraldehyde-3-phosphate dehydrogenase /DEF=Homo sapiens cDNA: FLJ22872 fis, clone KAT02551, highly similar to HUMGAPDH Human glyceraldehyde-3-phosphate dehydrogenase (GAPDH) mRNA.
RETN	220570_at	2.73058e-10	1.19861e-13	4.81201	2.26664	4.81201	up	43.1028	5.42971	43.1028	up	-0.98296	1.28368	4.44675	56729	Hs.283091	gb:NM_020415.2 /DB_XREF=gi:13435379 /GEN=FIZZ3 /FEA=FLmRNA /CNT=7 /TID=Hs.283091.0 /TIER=FL /STK=2 /UG=Hs.283091 /LL=56729 /DEF=Homo sapiens found in inflammatory zone 3 (FIZZ3), mRNA. /PROD=resistin /FL=gb:AF323081.1 gb:AF205952.1 gb:NM_020415.2
NIPBL	242352_at	2.73058e-10	1.10003e-13	-3.15124	-1.65592	3.15124	down	1.07658	0.106451	1.07658	up	0.0727957	-1.58312	0.179246	25836	Hs.481927	gb:AW272262 /DB_XREF=gi:6659292 /DB_XREF=xs07g07.x1 /CLONE=IMAGE:2768988 /FEA=EST /CNT=5 /TID=Hs.250468.0 /TIER=ConsEnd /STK=1 /UG=Hs.250468 /UG_TITLE=ESTs
TSPO	202096_s_at	3.12892e-10	1.43069e-13	1.69737	0.763302	1.69737	up	4.33863	2.11724	4.33863	up	-0.483225	0.280078	1.63402	706	Hs.202	gb:NM_000714.2 /DB_XREF=gi:6382068 /GEN=BZRP /FEA=FLmRNA /CNT=226 /TID=Hs.202.1 /TIER=FL+Stack /STK=133 /UG=Hs.202 /LL=706 /DEF=Homo sapiens benzodiazapine receptor (peripheral) (BZRP), nuclear gene encoding mitochondrial protein, transcript variant PBR, mRNA. /PROD=peripheral benzodiazapine receptor /FL=gb:BC001110.1 gb:M36035.1 gb:NM_000714.2
HK3	205936_s_at	3.14374e-10	1.49496e-13	3.60183	1.84873	3.60183	up	9.16075	3.19547	9.16075	up	-0.477914	1.37082	2.71755	3101	Hs.411695	gb:NM_002115.1 /DB_XREF=gi:4504394 /GEN=HK3 /FEA=FLmRNA /CNT=20 /TID=Hs.159237.0 /TIER=FL /STK=7 /UG=Hs.159237 /LL=3101 /DEF=Homo sapiens hexokinase 3 (white cell) (HK3), mRNA. /PROD=hexokinase 3 (white cell) /FL=gb:NM_002115.1 gb:U51333.1
SPOCK2	202524_s_at	3.95135e-10	2.05231e-13	-2.62817	-1.39406	2.62817	down	-3.01693	-1.59308	3.01693	down	0.714078	-0.679983	-0.879003	9806	Hs.523009	gb:NM_014767.1 /DB_XREF=gi:7662035 /GEN=KIAA0275 /FEA=FLmRNA /CNT=186 /TID=Hs.74583.0 /TIER=FL+Stack /STK=55 /UG=Hs.74583 /LL=9806 /DEF=Homo sapiens KIAA0275 gene product (KIAA0275), mRNA. /PROD=KIAA0275 gene product /FL=gb:NM_014767.1 gb:D87465.1
ANXA3	209369_at	3.95135e-10	1.95872e-13	7.44394	2.89607	7.44394	up	18.9876	4.24699	18.9876	up	-0.994985	1.90108	3.252	306	Hs.480042	gb:M63310.1 /DB_XREF=gi:178696 /GEN=ANX3 /FEA=FLmRNA /CNT=127 /TID=Hs.1378.0 /TIER=FL /STK=0 /UG=Hs.1378 /LL=306 /DEF=Human 1,2-cyclic-inositol-phosphate phosphodiesterase (ANX3) mRNA, complete cds. /PROD=1,2-cyclic-inositol-phosphate phosphodiesterase /FL=gb:BC000871.1 gb:M63310.1 gb:M20560.1 gb:NM_005139.1
TMEM204	219315_s_at	3.95135e-10	2.31263e-13	-3.22599	-1.68974	3.22599	down	-3.89013	-1.95982	3.89013	down	0.545141	-1.1446	-1.41468	79652	Hs.459652	gb:NM_024600.1 /DB_XREF=gi:13375800 /GEN=FLJ20898 /FEA=FLmRNA /CNT=58 /TID=Hs.25549.0 /TIER=FL /STK=0 /UG=Hs.25549 /LL=79652 /DEF=Homo sapiens hypothetical protein FLJ20898 (FLJ20898), mRNA. /PROD=hypothetical protein FLJ20898 /FL=gb:NM_024600.1
LOC102724993///LOC105376752///NPIP///NPIPA5///NPIPA7///NPIPA8///PKD1P1	221501_x_at	3.95135e-10	2.175e-13	-6.99843	-2.80703	6.99843	down	-7.97635	-2.99573	7.97635	down	1.98959	-0.81744	-1.00614	339044///730153///100288332///101059938///101059953///102724993///105376752	Hs.720303	gb:AF229069.1 /DB_XREF=gi:8980670 /FEA=FLmRNA /CNT=171 /TID=Hs.251928.1 /TIER=FL+Stack /STK=54 /UG=Hs.251928 /LL=9284 /UG_GENE=NPIP /DEF=Homo sapiens KIAA0220-like protein mRNA, complete cds. /PROD=KIAA0220-like protein /FL=gb:AF229069.1
ZFR	33148_at	3.95135e-10	2.25809e-13	-2.4767	-1.30842	2.4767	down	1.2088	0.273581	1.2088	up	0.121055	-1.18736	0.394636	51663	Hs.435231	Cluster Incl. AI459274:tk11f11.x1 Homo sapiens cDNA, 3 end /clone=IMAGE-2150733 /clone_end=3' /gb=AI459274 /gi=4311853 /ug=Hs.87150 /len=687
MBOAT2	226726_at	3.95135e-10	2.11543e-13	2.99627	1.58317	2.99627	up	3.60082	1.84833	3.60082	up	-0.622074	0.961094	1.22625	129642	Hs.467634	gb:W63676 /DB_XREF=gi:1371257 /DB_XREF=zd30b03.s1 /CLONE=IMAGE:342125 /FEA=EST /CNT=43 /TID=Hs.15641.0 /TIER=Stack /STK=21 /UG=Hs.15641 /UG_TITLE=ESTs
SNX3	213545_x_at	3.98253e-10	2.46708e-13	3.23108	1.69202	3.23108	up	4.70723	2.23488	4.70723	up	-0.70104	0.990976	1.53384	8724	Hs.12102	gb:BE962615 /DB_XREF=gi:11765691 /DB_XREF=601655968R1 /CLONE=IMAGE:3855785 /FEA=EST /CNT=30 /TID=Hs.12102.2 /TIER=Stack /STK=19 /UG=Hs.12102 /LL=8724 /UG_GENE=SNX3 /UG_TITLE=sorting nexin 3
USB1	218060_s_at	3.98253e-10	2.47656e-13	1.68316	0.751175	1.68316	up	2.68919	1.42717	2.68919	up	-0.443588	0.307586	0.983584	79650	Hs.408702	gb:NM_024598.1 /DB_XREF=gi:13375796 /GEN=FLJ13154 /FEA=FLmRNA /CNT=143 /TID=Hs.25303.0 /TIER=FL+Stack /STK=65 /UG=Hs.25303 /LL=79650 /DEF=Homo sapiens hypothetical protein FLJ13154 (FLJ13154), mRNA. /PROD=hypothetical protein FLJ13154 /FL=gb:NM_024598.1 gb:BC004415.1
HIST2H2AA3///HIST2H2AA4	214290_s_at	4.42794e-10	2.83453e-13	3.83558	1.93945	3.83558	up	3.59427	1.8457	3.59427	up	-0.574356	1.36509	1.27134	8337///723790	Hs.530461///Hs.745563	gb:AI313324 /DB_XREF=gi:4018929 /DB_XREF=ta77f02.x2 /CLONE=IMAGE:2050107 /FEA=EST /CNT=15 /TID=Hs.795.1 /TIER=Stack /STK=14 /UG=Hs.795 /LL=8337 /UG_GENE=H2AFO /UG_TITLE=H2A histone family, member O
CD177	219669_at	4.47027e-10	2.97467e-13	9.9879	3.32018	9.9879	up	111.941	6.8066	111.941	up	-1.46934	1.85084	5.33726	57126	Hs.232165	gb:NM_020406.1 /DB_XREF=gi:9966888 /GEN=PRV1 /FEA=FLmRNA /CNT=28 /TID=Hs.232165.0 /TIER=FL /STK=0 /UG=Hs.232165 /LL=57126 /DEF=Homo sapiens polycythemia rubra vera 1; cell surface receptor (PRV1), mRNA. /PROD=polycythemia rubra vera 1; cell surfacereceptor /FL=gb:NM_020406.1 gb:AF146747.1
CR1///CR1L	239205_s_at	4.47027e-10	3.02515e-13	3.72083	1.89563	3.72083	up	4.69025	2.22966	4.69025	up	-1.32463	0.571	0.905038	1378///1379	Hs.334019///Hs.655194	gb:BE552138 /DB_XREF=gi:9793830 /DB_XREF=hw29d02.x1 /CLONE=IMAGE:3184323 /FEA=EST /CNT=9 /TID=Hs.89688.0 /TIER=ConsEnd /STK=4 /UG=Hs.89688 /UG_TITLE=ESTs, Highly similar to A34924 complement C3bC4b receptor-like protein precursor (H.sapiens)
IRAK3	220034_at	4.50425e-10	3.13053e-13	4.0551	2.01974	4.0551	up	7.26079	2.86013	7.26079	up	-0.748511	1.27123	2.11161	11213	Hs.369265	gb:NM_007199.1 /DB_XREF=gi:6005791 /GEN=IRAK-M /FEA=FLmRNA /CNT=14 /TID=Hs.268552.0 /TIER=FL /STK=0 /UG=Hs.268552 /LL=11213 /DEF=Homo sapiens interleukin-1 receptor-associated kinase M (IRAK-M), mRNA. /PROD=interleukin-1 receptor-associated kinase M /FL=gb:AF113136.1 gb:NM_007199.1
RAB32	204214_s_at	5.41187e-10	3.86032e-13	2.17361	1.12009	2.17361	up	2.8481	1.51	2.8481	up	-0.402355	0.71774	1.10764	10981	Hs.287714	gb:NM_006834.1 /DB_XREF=gi:5803132 /GEN=RAB32 /FEA=FLmRNA /CNT=73 /TID=Hs.32217.0 /TIER=FL /STK=0 /UG=Hs.32217 /LL=10981 /DEF=Homo sapiens RAB32, member RAS oncogene family (RAB32), mRNA. /PROD=RAB32, member RAS oncogene family /FL=gb:NM_006834.1 gb:U71127.1
NDUFB8	214241_at	5.667e-10	4.14595e-13	-2.44508	-1.28988	2.44508	down	-1.81244	-0.857935	1.81244	down	0.526916	-0.762969	-0.331019	4714		gb:AA723057 /DB_XREF=gi:2740764 /DB_XREF=zg83b10.s1 /CLONE=IMAGE:399931 /FEA=EST /CNT=9 /TID=Hs.198273.1 /TIER=Stack /STK=8 /UG=Hs.198273 /LL=4714 /UG_GENE=NDUFB8 /UG_TITLE=NADH dehydrogenase (ubiquinone) 1 beta subcomplex, 8 (19kD, ASHI)
METTL9	217868_s_at	6.18386e-10	4.63719e-13	3.10177	1.63309	3.10177	up	5.71922	2.51582	5.71922	up	-0.605154	1.02794	1.91066	51108	Hs.279583	gb:NM_016025.1 /DB_XREF=gi:7705788 /GEN=DREV1 /FEA=FLmRNA /CNT=226 /TID=Hs.279583.0 /TIER=FL+Stack /STK=11 /UG=Hs.279583 /LL=51108 /DEF=Homo sapiens CGI-81 protein (DREV1), mRNA. /PROD=CGI-81 protein /FL=gb:NM_016025.1 gb:AF151839.1 gb:BC000195.1
CD55	201926_s_at	6.588e-10	5.25032e-13	3.78044	1.91855	3.78044	up	4.83479	2.27345	4.83479	up	-0.727839	1.19071	1.54562	1604	Hs.126517	gb:BC001288.1 /DB_XREF=gi:12654888 /FEA=FLmRNA /CNT=314 /TID=Hs.1369.0 /TIER=FL /STK=0 /UG=Hs.1369 /LL=1604 /UG_GENE=DAF /DEF=Homo sapiens, Similar to decay accelerating factor for complement (CD55, Cromer blood group system), clone MGC:5192, mRNA, complete cds. /PROD=Similar to decay accelerating factor forcomplement (CD55, Cromer blood group system) /FL=gb:BC001288.1 gb:M31516.1 gb:NM_000574.1
ACSL1	201963_at	6.588e-10	5.10132e-13	3.83591	1.93957	3.83591	up	3.87886	1.95563	3.87886	up	-0.818311	1.12126	1.13732	2180	Hs.406678	gb:NM_021122.2 /DB_XREF=gi:12669906 /GEN=FACL2 /FEA=FLmRNA /CNT=226 /TID=Hs.154890.0 /TIER=FL+Stack /STK=86 /UG=Hs.154890 /LL=2180 /DEF=Homo sapiens fatty-acid-Coenzyme A ligase, long-chain 2 (FACL2), mRNA. /PROD=long-chain fatty-acid-Coenzyme A ligase 2 /FL=gb:D10040.1 gb:NM_021122.2
OSBPL8	228986_at	6.588e-10	5.30173e-13	-3.40004	-1.76555	3.40004	down	1.45512	0.541133	1.45512	up	0.042485	-1.72307	0.583618	114882	Hs.430849	gb:AW978375 /DB_XREF=gi:8169640 /DB_XREF=EST390484 /FEA=EST /CNT=24 /TID=Hs.321129.0 /TIER=ConsEnd /STK=0 /UG=Hs.321129 /UG_TITLE=ESTs, Weakly similar to predicted using Genefinder (C.elegans)
DDX17	213998_s_at	6.85495e-10	5.76731e-13	-2.39384	-1.25933	2.39384	down	-1.06433	-0.0899435	1.06433	down	0.210303	-1.04903	0.12036	10521	Hs.528305	gb:AW188131 /DB_XREF=gi:6462567 /DB_XREF=xj92f11.x1 /CLONE=IMAGE:2664717 /FEA=EST /CNT=18 /TID=Hs.6179.4 /TIER=Stack /STK=10 /UG=Hs.6179 /LL=10521 /UG_GENE=DDX17 /UG_TITLE=DEADH (Asp-Glu-Ala-AspHis) box polypeptide 17 (72kD)
CR1	217552_x_at	6.85495e-10	5.72677e-13	3.16694	1.66309	3.16694	up	13.3611	3.73997	13.3611	up	-0.805528	0.857561	2.93444	1378	Hs.334019	gb:AI432713 /DB_XREF=gi:4283899 /DB_XREF=th43e02.x1 /CLONE=IMAGE:2121050 /FEA=EST /CNT=5 /TID=Hs.241053.0 /TIER=ConsEnd /STK=4 /UG=Hs.241053 /UG_TITLE=ESTs
WDFY3	212602_at	8.98767e-10	7.72603e-13	2.78523	1.4778	2.78523	up	3.19342	1.6751	3.19342	up	-0.535566	0.942232	1.13953	23001	Hs.480116	gb:AI806395 /DB_XREF=gi:5392961 /DB_XREF=wf27d05.x1 /CLONE=IMAGE:2356809 /FEA=mRNA /CNT=134 /TID=Hs.198135.0 /TIER=Stack /STK=14 /UG=Hs.198135 /LL=23001 /UG_GENE=KIAA0993 /UG_TITLE=KIAA0993 protein
GAPDH	AFFX-HUMGAPDH/M33197_3_at	9.75627e-10	8.56517e-13	1.40926	0.494939	1.40926	up	2.35771	1.23739	2.35771	up	-0.357945	0.136994	0.87944	2597	Hs.544577	H. sapiens /GEN=GAPD /DB_XREF=gb:M33197.1 /NOTE=SIF corresponding to nucleotides 908-1256 of gb:M33197.1 /DEF=Human glyceraldehyde-3-phosphate dehydrogenase (GAPDH) mRNA, complete cds.
WASL	205809_s_at	1.0253e-09	9.18877e-13	-10.5225	-3.3954	10.5225	down	-1.4052	-0.490778	1.4052	down	0.20031	-3.19509	-0.290467	8976	Hs.731519	gb:BE504979 /DB_XREF=gi:9707387 /DB_XREF=hz38g08.x1 /CLONE=IMAGE:3210302 /FEA=FLmRNA /CNT=24 /TID=Hs.288830.0 /TIER=Stack /STK=10 /UG=Hs.288830 /LL=8976 /UG_GENE=WASL /UG_TITLE=Wiskott-Aldrich syndrome-like /FL=gb:D88460.1 gb:NM_003941.1
RNF10	208632_at	1.05472e-09	9.64532e-13	2.41964	1.27479	2.41964	up	2.55798	1.355	2.55798	up	-0.577827	0.696967	0.777176	9921	Hs.442798	gb:AL578551 /DB_XREF=gi:12942733 /DB_XREF=AL578551 /CLONE=CS0DK001YG01 (3 prime) /FEA=FLmRNA /CNT=439 /TID=Hs.5094.1 /TIER=Stack /STK=42 /UG=Hs.5094 /LL=9921 /UG_GENE=RNF10 /UG_TITLE=ring finger protein 10 /FL=gb:AB027196.1
SLC25A37	226179_at	1.06522e-09	9.93621e-13	2.56611	1.35959	2.56611	up	3.15668	1.65841	3.15668	up	-0.466236	0.89335	1.19217	51312	Hs.596025	gb:N63920 /DB_XREF=gi:1211749 /DB_XREF=za28b09.s1 /CLONE=IMAGE:293849 /FEA=EST /CNT=62 /TID=Hs.34549.0 /TIER=Stack /STK=31 /UG=Hs.34549 /UG_TITLE=ESTs, Highly similar to S94541 1 clone 4-3 (H.sapiens)
LUC7L3	208835_s_at	1.09006e-09	1.03673e-12	-2.23276	-1.15883	2.23276	down	-1.30829	-0.387684	1.30829	down	0.210492	-0.948336	-0.177193	51747	Hs.130293	gb:AW089673 /DB_XREF=gi:6047017 /DB_XREF=xd21h11.x1 /CLONE=IMAGE:2594469 /FEA=FLmRNA /CNT=222 /TID=Hs.3688.1 /TIER=Stack /STK=9 /UG=Hs.3688 /LL=51747 /UG_GENE=LUC7A /UG_TITLE=cisplatin resistance-associated overexpressed protein /FL=gb:AB034205.1
CR1	244313_at	1.09191e-09	1.05846e-12	3.25739	1.70371	3.25739	up	6.85436	2.77702	6.85436	up	-0.735187	0.968528	2.04183	1378	Hs.334019	gb:AI052659 /DB_XREF=gi:3308650 /DB_XREF=oz18c04.x1 /CLONE=IMAGE:1675686 /FEA=EST /CNT=3 /TID=Hs.133255.0 /TIER=ConsEnd /STK=3 /UG=Hs.133255 /UG_TITLE=ESTs
UPP1	203234_at	1.10517e-09	1.11174e-12	2.89479	1.53346	2.89479	up	5.71225	2.51406	5.71225	up	-0.693586	0.839873	1.82047	7378	Hs.488240	gb:NM_003364.1 /DB_XREF=gi:4507838 /GEN=UP /FEA=FLmRNA /CNT=160 /TID=Hs.77573.0 /TIER=FL+Stack /STK=91 /UG=Hs.77573 /LL=7378 /DEF=Homo sapiens uridine phosphorylase (UP), mRNA. /PROD=uridine phosphorylase /FL=gb:NM_003364.1 gb:BC001405.1
MAPK1	212271_at	1.10517e-09	1.10186e-12	2.32545	1.21751	2.32545	up	2.2347	1.16008	2.2347	up	-0.31239	0.905117	0.84769	5594	Hs.431850	gb:AA195999 /DB_XREF=gi:1791623 /DB_XREF=zp99f06.s1 /CLONE=IMAGE:628355 /FEA=mRNA /CNT=199 /TID=Hs.324473.2 /TIER=Stack /STK=44 /UG=Hs.324473 /LL=5594 /UG_GENE=MAPK1 /UG_TITLE=mitogen-activated protein kinase 1
CD5	206485_at	1.16069e-09	1.18882e-12	-2.156	-1.10836	2.156	down	-6.0289	-2.59189	6.0289	down	0.466461	-0.641895	-2.12543	921	Hs.58685	gb:NM_014207.1 /DB_XREF=gi:7656964 /GEN=CD5 /FEA=FLmRNA /CNT=14 /TID=Hs.58685.0 /TIER=FL /STK=0 /UG=Hs.58685 /LL=921 /DEF=Homo sapiens CD5 antigen (p56-62) (CD5), mRNA. /PROD=CD5 antigen (p56-62) /FL=gb:NM_014207.1
MS4A4A	219607_s_at	1.23471e-09	1.28721e-12	4.86102	2.28126	4.86102	up	23.7339	4.56888	23.7339	up	-0.836661	1.4446	3.73221	51338	Hs.325960	gb:NM_024021.1 /DB_XREF=gi:13430865 /GEN=MS4A4 /FEA=FLmRNA /CNT=42 /TID=Hs.325960.0 /TIER=FL /STK=0 /UG=Hs.325960 /LL=51338 /DEF=Homo sapiens membrane-spanning 4-domains, subfamily A, member 4 (MS4A4), mRNA. /PROD=membrane-spanning 4-domains, subfamily A, member4 /FL=gb:NM_016650.1 gb:NM_024021.1 gb:AF068288.1 gb:AB013102.1
STOM	201061_s_at	1.33897e-09	1.4204e-12	2.8544	1.51319	2.8544	up	9.53857	3.25377	9.53857	up	-0.437421	1.07577	2.81635	2040	Hs.253903	gb:M81635.1 /DB_XREF=gi:181183 /GEN=stomatin peptide /FEA=FLmRNA /CNT=443 /TID=Hs.160483.0 /TIER=FL+Stack /STK=166 /UG=Hs.160483 /LL=2040 /DEF=Homo sapiens erythrocyte membrane protein mRNA, complete cds. /PROD=stomatin peptide /FL=gb:M81635.1 gb:NM_004099.1
ADAM9	202381_at	1.42596e-09	1.57141e-12	4.56136	2.18946	4.56136	up	9.03979	3.17629	9.03979	up	-0.891107	1.29836	2.28518	8754	Hs.591852	gb:NM_003816.1 /DB_XREF=gi:4501914 /GEN=ADAM9 /FEA=FLmRNA /CNT=131 /TID=Hs.2442.0 /TIER=FL /STK=0 /UG=Hs.2442 /LL=8754 /DEF=Homo sapiens a disintegrin and metalloproteinase domain 9 (meltrin gamma) (ADAM9), mRNA. /PROD=a disintegrin and metalloproteinase domain 9preproprotein /FL=gb:NM_003816.1 gb:U41766.1
PRMT2	210384_at	1.42596e-09	1.59092e-12	-6.66417	-2.73643	6.66417	down	-1.01473	-0.0210903	1.01473	down	0.252632	-2.48379	0.231542	3275	Hs.154163	gb:U79286.1 /DB_XREF=gi:1710262 /FEA=FLmRNA /CNT=9 /TID=Hs.235887.1 /TIER=FL /STK=0 /UG=Hs.235887 /LL=3275 /UG_GENE=HRMT1L1 /DEF=Human arginine methyltransferase mRNA, complete cds. /PROD=arginine methyltransferase /FL=gb:U79286.1
CD55	1555950_a_at	1.42596e-09	1.58038e-12	3.43237	1.7792	3.43237	up	4.57781	2.19466	4.57781	up	-0.649402	1.1298	1.54526	1604	Hs.126517	gb:CA448665 /DB_XREF=gi:24813085 /DB_XREF=UI-H-EI0-ayo-p-15-0-UI.s1 /CLONE=UI-H-EI0-ayo-p-15-0-UI /TID=Hs2.1369.3 /CNT=31 /FEA=mRNA /TIER=Stack /STK=9 /LL=1604 /UG_GENE=DAF /UG=Hs.1369 /UG_TITLE=decay accelerating factor for complement (CD55, Cromer blood group system)
CDC42EP3	209286_at	1.49488e-09	1.69516e-12	2.51666	1.33151	2.51666	up	3.00576	1.58773	3.00576	up	-0.775985	0.555525	0.811742	10602	Hs.369574	gb:AI754416 /DB_XREF=gi:5132680 /DB_XREF=cr25a08.x1 /CLONE=HBMSC_cr25a08 /FEA=FLmRNA /CNT=172 /TID=Hs.260024.0 /TIER=Stack /STK=26 /UG=Hs.260024 /LL=10602 /UG_GENE=CEP3 /UG_TITLE=Cdc42 effector protein 3 /FL=gb:AF164118.1 gb:NM_006449.1 gb:AF094521.1 gb:AF104857.1 gb:AL136842.1
ANKRD22	239196_at	1.53702e-09	1.77105e-12	4.4217	2.1446	4.4217	up	11.3414	3.50353	11.3414	up	-1.09232	1.05228	2.4112	118932	Hs.217484	gb:AI097229 /DB_XREF=gi:3446811 /DB_XREF=qb88d09.x1 /CLONE=IMAGE:1707185 /FEA=EST /CNT=7 /TID=Hs.217484.0 /TIER=ConsEnd /STK=3 /UG=Hs.217484 /UG_TITLE=ESTs, Weakly similar to ALU1_HUMAN ALU SUBFAMILY J SEQUENCE CONTAMINATION WARNING ENTRY (H.sapiens)
EMILIN2	224374_s_at	1.61985e-09	1.92575e-12	1.20741	0.271914	1.20741	up	3.49017	1.8033	3.49017	up	-0.176557	0.0953575	1.62674	84034	Hs.532815	gb:AF270513.1 /DB_XREF=gi:13661555 /FEA=FLmRNA /CNT=1 /TID=HsAffx.900546.858 /TIER=FL /STK=0 /DEF=Homo sapiens extracellular glycoprotein EMILIN-2 precursor, mRNA, complete cds. /PROD=extracellular glycoprotein EMILIN-2 precursor /FL=gb:AF270513.1
MALAT1	1558678_s_at	1.61985e-09	1.91358e-12	-2.29559	-1.19886	2.29559	down	1.38593	0.470857	1.38593	up	0.110017	-1.08885	0.580874	378938	Hs.621695	gb:BE708432 /DB_XREF=gi:10096697 /DB_XREF=MR0-HT0559-170700-023-e03 /TID=Hs2.356442.1 /CNT=7 /FEA=mRNA /TIER=ConsEnd /STK=0 /LL=29005 /UG_GENE=PRO1073 /UG=Hs.356442 /UG_TITLE=PRO1073 protein
PLD4	235802_at	1.63629e-09	1.97522e-12	-2.58944	-1.37264	2.58944	down	-5.39183	-2.43077	5.39183	down	0.836387	-0.53625	-1.59439	122618	Hs.407101	gb:BE676703 /DB_XREF=gi:10037244 /DB_XREF=7f34f05.x1 /CLONE=IMAGE:3296577 /FEA=EST /CNT=10 /TID=Hs.136896.0 /TIER=ConsEnd /STK=6 /UG=Hs.136896 /UG_TITLE=ESTs, Weakly similar to T32489 hypothetical protein F09G2.8 - Caenorhabditis elegans (C.elegans)
HECTD1	241955_at	1.78989e-09	2.19338e-12	-2.59947	-1.37822	2.59947	down	1.29268	0.370368	1.29268	up	0.129268	-1.24895	0.499636	25831	Hs.708017	gb:BE243270 /DB_XREF=gi:9095005 /DB_XREF=TCAAP3D0917 /CLONE=TCAAP0917 /FEA=EST /CNT=5 /TID=Hs.314346.0 /TIER=ConsEnd /STK=0 /UG=Hs.314346 /UG_TITLE=ESTs, Weakly similar to 26S proteasome subunit p28 (H.sapiens)
CR1	208488_s_at	2.05751e-09	2.59659e-12	4.62619	2.20982	4.62619	up	2.76118	1.46528	2.76118	up	-1.01997	1.18986	0.445316	1378	Hs.334019	gb:NM_000651.1 /DB_XREF=gi:10834995 /GEN=CR1 /FEA=FLmRNA /CNT=2 /TID=Hs.193716.1 /TIER=FL /STK=0 /UG=Hs.193716 /LL=1378 /DEF=Homo sapiens complement component (3b4b) receptor 1, including Knops blood group system (CR1), mRNA. /PROD=complement component (3b4b) receptor 1,including Knops blood group system /FL=gb:NM_000651.1
TFDP1	212330_at	2.05751e-09	2.59587e-12	3.46804	1.79412	3.46804	up	2.78544	1.4779	2.78544	up	-0.642728	1.15139	0.835176	7027	Hs.79353	gb:R60866 /DB_XREF=gi:831561 /DB_XREF=yh08a11.s1 /CLONE=IMAGE:42383 /FEA=EST /CNT=154 /TID=Hs.79353.2 /TIER=Stack /STK=24 /UG=Hs.79353 /LL=64418 /UG_GENE=FLJ13576 /UG_TITLE=hypothetical protein FLJ13576
H2AFJ	225245_x_at	2.14438e-09	2.74543e-12	2.11867	1.08316	2.11867	up	2.48025	1.31048	2.48025	up	-0.701025	0.382136	0.609458	55766	Hs.524280	gb:BG386566 /DB_XREF=gi:13280012 /DB_XREF=602454814F1 /CLONE=IMAGE:4583187 /FEA=EST /CNT=137 /TID=Hs.36727.3 /TIER=Stack /STK=86 /UG=Hs.36727 /LL=55766 /UG_GENE=FLJ10903 /UG_TITLE=hypothetical protein FLJ10903
DRAM1	218627_at	2.24201e-09	2.95245e-12	1.63343	0.707908	1.63343	up	3.23813	1.69516	3.23813	up	-0.379495	0.328412	1.31567	55332	Hs.525634	gb:NM_018370.1 /DB_XREF=gi:8922957 /GEN=FLJ11259 /FEA=FLmRNA /CNT=71 /TID=Hs.184465.0 /TIER=FL+Stack /STK=31 /UG=Hs.184465 /LL=55332 /DEF=Homo sapiens hypothetical protein FLJ11259 (FLJ11259), mRNA. /PROD=hypothetical protein FLJ11259 /FL=gb:NM_018370.1
STRBP	233252_s_at	2.24201e-09	2.93224e-12	-3.44917	-1.78625	3.44917	down	-2.04968	-1.0354	2.04968	down	0.682448	-1.1038	-0.352953	55342	Hs.694157	gb:AK024960.1 /DB_XREF=gi:10437385 /FEA=mRNA /CNT=4 /TID=Hs.287659.0 /TIER=ConsEnd /STK=1 /UG=Hs.287659 /UG_TITLE=Homo sapiens cDNA: FLJ21307 fis, clone COL02129 /DEF=Homo sapiens cDNA: FLJ21307 fis, clone COL02129.
SRPK1	202200_s_at	2.27348e-09	3.14227e-12	3.38907	1.76089	3.38907	up	3.905	1.96532	3.905	up	-0.555871	1.20502	1.40945	6732	Hs.443861	gb:NM_003137.1 /DB_XREF=gi:4507218 /GEN=SRPK1 /FEA=FLmRNA /CNT=179 /TID=Hs.75761.0 /TIER=FL+Stack /STK=29 /UG=Hs.75761 /LL=6732 /DEF=Homo sapiens SFRS protein kinase 1 (SRPK1), mRNA. /PROD=SFRS protein kinase 1 /FL=gb:NM_003137.1 gb:U09564.1
CYP1B1	202435_s_at	2.27348e-09	3.05221e-12	6.29311	2.65377	6.29311	up	9.58776	3.26119	9.58776	up	-0.716045	1.93773	2.54515	1545	Hs.154654	gb:AU154504 /DB_XREF=gi:11016025 /DB_XREF=AU154504 /CLONE=NT2RP4001328 /FEA=FLmRNA /CNT=212 /TID=Hs.154654.0 /TIER=Stack /STK=20 /UG=Hs.154654 /LL=1545 /UG_GENE=CYP1B1 /UG_TITLE=cytochrome P450, subfamily I (dioxin-inducible), polypeptide 1 (glaucoma 3, primary infantile) /FL=gb:U03688.1 gb:NM_000104.2
PFKFB3	202464_s_at	2.27348e-09	3.16021e-12	5.35796	2.42168	5.35796	up	9.92938	3.3117	9.92938	up	-0.596017	1.82567	2.71569	5209	Hs.195471	gb:NM_004566.1 /DB_XREF=gi:4758899 /GEN=PFKFB3 /FEA=FLmRNA /CNT=137 /TID=Hs.195471.0 /TIER=FL /STK=0 /UG=Hs.195471 /LL=5209 /DEF=Homo sapiens 6-phosphofructo-2-kinasefructose-2,6-biphosphatase 3 (PFKFB3), mRNA. /PROD=6-phosphofructo-2-kinasefructose-2,6-biphosphatase 3 /FL=gb:AF109735.1 gb:NM_004566.1 gb:D49817.1
CHPT1	221675_s_at	2.27348e-09	3.12354e-12	3.09833	1.63149	3.09833	up	3.51984	1.81551	3.51984	up	-0.939153	0.692337	0.876358	56994	Hs.293077	gb:AF195624.1 /DB_XREF=gi:9502012 /FEA=FLmRNA /CNT=1 /TID=Hs.171889.1 /TIER=FL /STK=0 /UG=Hs.171889 /LL=56994 /UG_GENE=LOC56994 /DEF=Homo sapiens cholinephosphotransferase 1 beta mRNA, complete cds. /PROD=cholinephosphotransferase 1 beta /FL=gb:AF195624.1
NHP2	209104_s_at	2.42246e-09	3.41161e-12	-2.18122	-1.12513	2.18122	down	-1.78199	-0.833488	1.78199	down	0.406193	-0.718939	-0.427295	55651	Hs.744074	gb:BC000009.1 /DB_XREF=gi:12652540 /FEA=FLmRNA /CNT=190 /TID=Hs.23990.0 /TIER=FL /STK=1 /UG=Hs.23990 /LL=55651 /UG_GENE=NOLA2 /DEF=Homo sapiens, likely homolog of yeast Nhp2, component of the HACA snoRNP; hypothetical protein FLJ20479, clone MGC:1038, mRNA, complete cds. /PROD=likely homolog of yeast Nhp2, component of theHACA snoRNP; hypothetical protein FLJ20479 /FL=gb:NM_017838.1 gb:BC000009.1
FLJ10038///GABPB1	205511_at	2.57809e-09	3.81839e-12	-2.52152	-1.3343	2.52152	down	1.06803	0.0949464	1.06803	up	0.187639	-1.14666	0.282585	2553///55056	Hs.511316	gb:NM_017976.1 /DB_XREF=gi:8922197 /GEN=FLJ10038 /FEA=FLmRNA /CNT=31 /TID=Hs.181202.0 /TIER=FL /STK=1 /UG=Hs.181202 /LL=55056 /DEF=Homo sapiens hypothetical protein FLJ10038 (FLJ10038), mRNA. /PROD=hypothetical protein FLJ10038 /FL=gb:NM_017976.1
RNASE2	206111_at	2.57809e-09	3.74642e-12	2.46774	1.30319	2.46774	up	8.46331	3.08122	8.46331	up	-0.47396	0.829233	2.60726	6036	Hs.728	gb:NM_002934.1 /DB_XREF=gi:4506548 /GEN=RNASE2 /FEA=FLmRNA /CNT=50 /TID=Hs.728.0 /TIER=FL /STK=3 /UG=Hs.728 /LL=6036 /DEF=Homo sapiens ribonuclease, RNase A family, 2 (liver, eosinophil-derived neurotoxin) (RNASE2), mRNA. /PROD=ribonuclease, RNase A family, 2 (liver,eosinophil-derived neurotoxin) /FL=gb:M28129.1 gb:M30510.1 gb:M24157.1 gb:NM_002934.1
ASB2	227915_at	2.57809e-09	3.73552e-12	-9.60562	-3.26388	9.60562	down	-5.66336	-2.50166	5.66336	down	1.55193	-1.71194	-0.949722	51676	Hs.510327	gb:AI872284 /DB_XREF=gi:5546333 /DB_XREF=wm57b03.x1 /CLONE=IMAGE:2440013 /FEA=FLmRNA /CNT=38 /TID=Hs.182416.0 /TIER=Stack /STK=23 /UG=Hs.182416 /LL=51676 /UG_GENE=ASB2 /UG_TITLE=ankyrin repeat-containing protein ASB-2 /FL=gb:NM_016150.1 gb:AF159164.1
FAM20A	241981_at	2.57809e-09	3.81939e-12	8.2725	3.04832	8.2725	up	38.8966	5.28157	38.8966	up	-2.14289	0.905433	3.13868	54757	Hs.268874///Hs.663158	gb:AW291369 /DB_XREF=gi:6698089 /DB_XREF=UI-H-BI2-aga-a-01-0-UI.s1 /CLONE=IMAGE:2723592 /FEA=EST /CNT=3 /TID=Hs.166593.0 /TIER=ConsEnd /STK=3 /UG=Hs.166593 /UG_TITLE=ESTs
WDR54	225898_at	2.82572e-09	4.23793e-12	-2.27854	-1.18811	2.27854	down	-2.86993	-1.52102	2.86993	down	0.356026	-0.832081	-1.16499	84058	Hs.643480	gb:AK023015.1 /DB_XREF=gi:10434733 /FEA=mRNA /CNT=60 /TID=Hs.323537.0 /TIER=Stack /STK=19 /UG=Hs.323537 /UG_TITLE=Homo sapiens cDNA FLJ12953 fis, clone NT2RP2005490, moderately similar to Mus musculus D3Mm3e (D3Mm3e) mRNA /DEF=Homo sapiens cDNA FLJ12953 fis, clone NT2RP2005490, moderately similar to Mus musculus D3Mm3e (D3Mm3e) mRNA.
AKAP1	201675_at	2.88413e-09	4.4881e-12	-2.1602	-1.11116	2.1602	down	-2.81861	-1.49499	2.81861	down	0.517802	-0.593361	-0.977184	8165	Hs.463506	gb:NM_003488.1 /DB_XREF=gi:4502014 /GEN=AKAP1 /FEA=FLmRNA /CNT=230 /TID=Hs.78921.0 /TIER=FL+Stack /STK=39 /UG=Hs.78921 /LL=8165 /DEF=Homo sapiens A kinase (PRKA) anchor protein 1 (AKAP1), mRNA. /PROD=A kinase (PRKA) anchor protein 1 /FL=gb:BC000729.1 gb:NM_003488.1
F5	204714_s_at	2.88413e-09	4.54406e-12	3.81644	1.93223	3.81644	up	5.52836	2.46685	5.52836	up	-0.947612	0.984614	1.51924	2153	Hs.30054	gb:NM_000130.2 /DB_XREF=gi:10518500 /GEN=F5 /FEA=FLmRNA /CNT=87 /TID=Hs.30054.0 /TIER=FL+Stack /STK=26 /UG=Hs.30054 /LL=2153 /DEF=Homo sapiens coagulation factor V (proaccelerin, labile factor) (F5), mRNA. /PROD=coagulation factor V precursor /FL=gb:NM_000130.2 gb:M14335.1 gb:M16967.1
LBH	221011_s_at	2.88413e-09	4.59015e-12	-3.57353	-1.83735	3.57353	down	-3.77164	-1.91519	3.77164	down	0.820295	-1.01706	-1.0949	81606	Hs.567598	gb:NM_030915.1 /DB_XREF=gi:13569871 /GEN=DKFZP566J091 /FEA=FLmRNA /CNT=1 /TID=HsAffx.900111.159 /TIER=FL /STK=0 /DEF=Homo sapiens hypothetical protein DKFZp566J091 (DKFZP566J091), mRNA. /PROD=hypothetical protein DKFZp566J091 /FL=gb:NM_030915.1
METTL9	222447_at	2.88413e-09	4.54773e-12	2.22537	1.15404	2.22537	up	5.12201	2.35671	5.12201	up	-0.471406	0.682637	1.8853	51108	Hs.279583	gb:BC000195.1 /DB_XREF=gi:12652878 /FEA=FLmRNA /CNT=226 /TID=Hs.279583.0 /TIER=FL+Stack /STK=30 /UG=Hs.279583 /LL=51108 /UG_GENE=DREV1 /DEF=Homo sapiens, Similar to CGI-81 protein, clone MGC:705, mRNA, complete cds. /PROD=Similar to CGI-81 protein /FL=gb:NM_016025.1 gb:AF151839.1 gb:BC000195.1
DDX17	230180_at	2.88413e-09	4.64205e-12	-2.91571	-1.54385	2.91571	down	-1.01484	-0.0212513	1.01484	down	0.115246	-1.4286	0.0939946	10521		gb:AA521056 /DB_XREF=gi:2261599 /DB_XREF=aa71e05.s1 /CLONE=IMAGE:826400 /FEA=EST /CNT=25 /TID=Hs.6179.3 /TIER=Stack /STK=23 /UG=Hs.6179 /LL=10521 /UG_GENE=DDX17 /UG_TITLE=DEADH (Asp-Glu-Ala-AspHis) box polypeptide 17 (72kD)
SRGN	1554676_at	2.88413e-09	4.5374e-12	6.80682	2.76698	6.80682	up	2.11553	1.08102	2.11553	up	-0.733781	2.0332	0.34724	5552		gb:BC022313.1 /DB_XREF=gi:18490840 /TID=Hs2.352421.1 /CNT=5 /FEA=FLmRNA /TIER=FL /STK=1 /UG=Hs.352421 /DEF=Homo sapiens, Similar to proteoglycan 1, secretory granule, clone MGC:22605 IMAGE:4688573, mRNA, complete cds. /PROD=Similar to proteoglycan 1, secretory granule /FL=gb:BC022313.1
TLE2	40837_at	2.88755e-09	4.70035e-12	-5.6079	-2.48746	5.6079	down	-7.94883	-2.99074	7.94883	down	1.03801	-1.44945	-1.95273	7089	Hs.332173	Cluster Incl. M99436:Human transducin-like enhancer protein (TLE2) mRNA, complete cds /cds=(25,2256) /gb=M99436 /gi=307511 /ug=Hs.173063 /len=2271
ABLIM1	200965_s_at	3.00663e-09	4.96624e-12	-3.24413	-1.69783	3.24413	down	-5.08016	-2.34487	5.08016	down	0.437731	-1.2601	-1.90714	3983	Hs.438236	gb:NM_006720.1 /DB_XREF=gi:5921987 /GEN=ABLIM /FEA=FLmRNA /CNT=303 /TID=Hs.158203.0 /TIER=FL+Stack /STK=78 /UG=Hs.158203 /LL=3983 /DEF=Homo sapiens actin binding LIM protein 1 (ABLIM), transcript variant ABLIM-s, mRNA. /PROD=actin-binding LIM protein 1, isoform s /FL=gb:D31883.1 gb:NM_006720.1
MAPK14	202530_at	3.00663e-09	5.00418e-12	3.75485	1.90875	3.75485	up	4.64922	2.21699	4.64922	up	-0.395122	1.51363	1.82187	1432	Hs.485233	gb:NM_001315.1 /DB_XREF=gi:4503068 /GEN=MAPK14 /FEA=FLmRNA /CNT=154 /TID=Hs.79107.0 /TIER=FL+Stack /STK=55 /UG=Hs.79107 /LL=1432 /DEF=Homo sapiens mitogen-activated protein kinase 14 (MAPK14), mRNA. /PROD=mitogen-activated protein kinase 14 /FL=gb:L35263.1 gb:NM_001315.1
CREG1	201200_at	3.0172e-09	5.10016e-12	2.90591	1.53899	2.90591	up	3.16114	1.66045	3.16114	up	-0.477112	1.06188	1.18333	8804	Hs.5710	gb:NM_003851.1 /DB_XREF=gi:4503036 /GEN=CREG /FEA=FLmRNA /CNT=323 /TID=Hs.5710.0 /TIER=FL+Stack /STK=143 /UG=Hs.5710 /LL=8804 /DEF=Homo sapiens cellular repressor of E1A-stimulated genes (CREG), mRNA. /PROD=cellular repressor of E1A-stimulated genes /FL=gb:NM_003851.1 gb:AF084523.1
WSB1	210561_s_at	3.0172e-09	5.18732e-12	4.02655	2.00955	4.02655	up	3.24528	1.69834	3.24528	up	-0.442178	1.56737	1.25616	26118	Hs.446017	gb:AL110243.1 /DB_XREF=gi:5817189 /GEN=DKFZp564B0482 /FEA=FLmRNA /CNT=8 /TID=Hs.187991.2 /TIER=FL /STK=0 /UG=Hs.187991 /LL=26118 /DEF=Homo sapiens mRNA; cDNA DKFZp564B0482 (from clone DKFZp564B0482); complete cds. /PROD=hypothetical protein /FL=gb:AF069313.2 gb:AF072880.1 gb:AL110243.1 gb:AF112205.1 gb:AF106683.1
KIF1B	225878_at	3.0172e-09	5.1464e-12	3.1021	1.63324	3.1021	up	4.57451	2.19362	4.57451	up	-0.552176	1.08107	1.64144	23095	Hs.97858	gb:AL135264 /DB_XREF=gi:6603451 /DB_XREF=DKFZp762O2013_r1 /CLONE=DKFZp762O2013 /FEA=EST /CNT=92 /TID=Hs.14434.0 /TIER=Stack /STK=48 /UG=Hs.14434 /UG_TITLE=ESTs
RAB10	222981_s_at	3.14446e-09	5.46363e-12	1.50798	0.59262	1.50798	up	2.99429	1.58221	2.99429	up	-0.222568	0.370052	1.35964	10890	Hs.467960	gb:BC000896.1 /DB_XREF=gi:12654156 /FEA=FLmRNA /CNT=434 /TID=Hs.236494.0 /TIER=FL+Stack /STK=52 /UG=Hs.236494 /LL=10890 /UG_GENE=RAB10 /DEF=Homo sapiens, RAB10, member RAS oncogene family, clone MGC:4875, mRNA, complete cds. /PROD=RAB10, member RAS oncogene family /FL=gb:BC000896.1 gb:NM_016131.1 gb:AL136650.1 gb:AF297660.1 gb:AF106681.1
HIST2H2AA3///HIST2H2AA4	218280_x_at	3.15381e-09	5.53756e-12	2.89081	1.53147	2.89081	up	3.37179	1.75352	3.37179	up	-0.435066	1.09641	1.31845	8337///723790	Hs.530461///Hs.745563	gb:NM_003516.1 /DB_XREF=gi:4504250 /GEN=H2AFO /FEA=FLmRNA /CNT=109 /TID=Hs.795.0 /TIER=FL+Stack /STK=70 /UG=Hs.795 /LL=8337 /DEF=Homo sapiens H2A histone family, member O (H2AFO), mRNA. /PROD=H2A histone family, member O /FL=gb:L19779.1 gb:NM_003516.1 gb:BC001629.1
ANKRD22	238439_at	3.30218e-09	5.85846e-12	8.81681	3.14026	8.81681	up	16.1814	4.01626	16.1814	up	-1.45855	1.6817	2.55771	118932	Hs.217484	gb:AI925518 /DB_XREF=gi:5661482 /DB_XREF=wo31e07.x1 /CLONE=IMAGE:2456964 /FEA=EST /CNT=13 /TID=Hs.268362.0 /TIER=ConsEnd /STK=1 /UG=Hs.268362 /UG_TITLE=ESTs, Weakly similar to hypothetical protein (H.sapiens)
BRAF	236402_at	3.43575e-09	6.15827e-12	2.23091	1.15763	2.23091	up	3.08918	1.62722	3.08918	up	-0.625131	0.532504	1.00209	673		gb:AW184034 /DB_XREF=gi:6452548 /DB_XREF=xj90h08.x1 /CLONE=IMAGE:2664543 /FEA=EST /CNT=6 /TID=Hs.162967.0 /TIER=ConsEnd /STK=6 /UG=Hs.162967 /UG_TITLE=ESTs
CD7	214551_s_at	3.46082e-09	6.26651e-12	-4.16348	-2.05779	4.16348	down	-6.0558	-2.59832	6.0558	down	1.00179	-1.056	-1.59653	924	Hs.36972	gb:NM_006137.2 /DB_XREF=gi:7382452 /GEN=CD7 /FEA=FLmRNA /CNT=3 /TID=Hs.36972.1 /TIER=FL /STK=0 /UG=Hs.36972 /LL=924 /DEF=Homo sapiens CD7 antigen (p41) (CD7), mRNA. /PROD=CD7 antigen (p41) /FL=gb:NM_006137.2
EMB	226789_at	3.49905e-09	6.39973e-12	2.38492	1.25394	2.38492	up	2.97465	1.57272	2.97465	up	-0.463551	0.79039	1.10917	133418	Hs.561411	gb:W84421 /DB_XREF=gi:1395562 /DB_XREF=zd89g04.s1 /CLONE=IMAGE:356694 /FEA=EST /CNT=50 /TID=Hs.83992.0 /TIER=Stack /STK=19 /UG=Hs.83992 /UG_TITLE=ESTs
GYG1	201554_x_at	3.54504e-09	6.54868e-12	6.27564	2.64976	6.27564	up	11.832	3.56462	11.832	up	-0.894254	1.75551	2.67037	2992	Hs.477892	gb:NM_004130.1 /DB_XREF=gi:4758491 /GEN=GYG /FEA=FLmRNA /CNT=244 /TID=Hs.174071.0 /TIER=FL /STK=0 /UG=Hs.174071 /LL=2992 /DEF=Homo sapiens glycogenin (GYG), mRNA. /PROD=glycogenin /FL=gb:U44131.1 gb:NM_004130.1 gb:BC000033.1 gb:U31525.1
KIF1B	209234_at	3.56998e-09	6.76372e-12	3.16514	1.66227	3.16514	up	3.67324	1.87705	3.67324	up	-0.644618	1.01765	1.23244	23095	Hs.97858	gb:BF939474 /DB_XREF=gi:12356794 /DB_XREF=nac76d12.x1 /CLONE=IMAGE:3440303 /FEA=FLmRNA /CNT=117 /TID=Hs.129908.0 /TIER=Stack /STK=28 /UG=Hs.129908 /LL=23095 /UG_GENE=KIAA0591 /UG_TITLE=KIAA0591 protein /FL=gb:BC001415.1
CNIH4	218728_s_at	3.56998e-09	6.79063e-12	3.06647	1.61658	3.06647	up	7.25015	2.85801	7.25015	up	-0.550737	1.06584	2.30727	29097	Hs.445890	gb:NM_014184.1 /DB_XREF=gi:7661823 /GEN=HSPC163 /FEA=FLmRNA /CNT=76 /TID=Hs.108854.0 /TIER=FL+Stack /STK=39 /UG=Hs.108854 /LL=29097 /DEF=Homo sapiens HSPC163 protein (HSPC163), mRNA. /PROD=HSPC163 protein /FL=gb:BC000573.1 gb:NM_014184.1 gb:AF161512.1
WDR26	224898_at	3.56998e-09	6.70156e-12	3.32937	1.73525	3.32937	up	2.6794	1.42191	2.6794	up	-0.807386	0.927862	0.614525	80232	Hs.497873	gb:BG177759 /DB_XREF=gi:12684462 /DB_XREF=602314944F1 /CLONE=IMAGE:4420667 /FEA=mRNA /CNT=135 /TID=Hs.5534.0 /TIER=Stack /STK=12 /UG=Hs.5534 /UG_TITLE=Homo sapiens cDNA FLJ12961 fis, clone NT2RP2005645
LOC441155///ZC3H11A	205787_x_at	3.61922e-09	6.95049e-12	-2.23853	-1.16255	2.23853	down	1.18875	0.249441	1.18875	up	0.0974086	-1.06514	0.346849	9877///441155	Hs.532399	gb:AI803216 /DB_XREF=gi:5368688 /DB_XREF=tc15d10.x1 /CLONE=IMAGE:2063923 /FEA=FLmRNA /CNT=26 /TID=Hs.17969.0 /TIER=Stack /STK=10 /UG=Hs.17969 /LL=9877 /UG_GENE=KIAA0663 /UG_TITLE=KIAA0663 gene product /FL=gb:AB014563.1 gb:NM_014827.1
CD3E	205456_at	3.83132e-09	7.42788e-12	-4.67232	-2.22414	4.67232	down	-5.75151	-2.52394	5.75151	down	0.579355	-1.64478	-1.94458	916	Hs.3003	gb:NM_000733.1 /DB_XREF=gi:4502670 /GEN=CD3E /FEA=FLmRNA /CNT=38 /TID=Hs.3003.0 /TIER=FL+Stack /STK=8 /UG=Hs.3003 /LL=916 /DEF=Homo sapiens CD3E antigen, epsilon polypeptide (TiT3 complex) (CD3E), mRNA. /PROD=CD3E antigen, epsilon polypeptide (TiT3complex) /FL=gb:NM_000733.1
TP53	201746_at	3.84972e-09	7.62414e-12	-2.36865	-1.24407	2.36865	down	-2.23577	-1.16077	2.23577	down	0.443189	-0.800877	-0.717586	7157	Hs.437460	gb:NM_000546.2 /DB_XREF=gi:8400737 /GEN=TP53 /FEA=FLmRNA /CNT=209 /TID=Hs.1846.0 /TIER=FL+Stack /STK=20 /UG=Hs.1846 /LL=7157 /DEF=Homo sapiens tumor protein p53 (Li-Fraumeni syndrome) (TP53), mRNA. /PROD=tumor protein p53 /FL=gb:NM_000546.2 gb:M14695.1 gb:M14694.1 gb:AF307851.1 gb:BC003596.1
VPS51	217969_at	3.84972e-09	7.72387e-12	-2.21904	-1.14994	2.21904	down	-2.30138	-1.2025	2.30138	down	0.419129	-0.730809	-0.78337	738	Hs.277517	gb:NM_013265.2 /DB_XREF=gi:8393008 /GEN=C11ORF2 /FEA=FLmRNA /CNT=180 /TID=Hs.5258.0 /TIER=FL /STK=0 /UG=Hs.5258 /LL=738 /DEF=Homo sapiens chromosome 11 open reading frame2 (C11ORF2), mRNA. /PROD=chromosome 11 open reading frame2 /FL=gb:NM_013265.2 gb:AF024631.2
SERPINB1	228726_at	3.84972e-09	7.63137e-12	2.8225	1.49697	2.8225	up	6.77179	2.75954	6.77179	up	-0.466452	1.03052	2.29309	1992	Hs.381167	gb:AW512196 /DB_XREF=gi:7150274 /DB_XREF=xx71e04.x1 /CLONE=IMAGE:2849118 /FEA=EST /CNT=15 /TID=Hs.234392.2 /TIER=Stack /STK=10 /UG=Hs.234392 /LL=5051 /UG_GENE=PAFAH2 /UG_TITLE=platelet-activating factor acetylhydrolase 2 (40kD)
RBM27	243295_at	3.84972e-09	7.74521e-12	-1.93549	-0.9527	1.93549	down	-1.12863	-0.174571	1.12863	down	0.20245	-0.75025	0.0278786	54439	Hs.61441	gb:N75450 /DB_XREF=gi:1238028 /DB_XREF=za83a08.s1 /CLONE=IMAGE:299126 /FEA=EST /CNT=7 /TID=Hs.183412.0 /TIER=ConsEnd /STK=1 /UG=Hs.183412 /UG_TITLE=ESTs, Moderately similar to AF116721 67 PRO1777 (H.sapiens)
AKR1B1	201272_at	3.93139e-09	7.98142e-12	-1.79722	-0.845771	1.79722	down	-2.37546	-1.2482	2.37546	down	0.48199	-0.363781	-0.766215	231	Hs.521212	gb:NM_001628.1 /DB_XREF=gi:4502048 /GEN=AKR1B1 /FEA=FLmRNA /CNT=453 /TID=Hs.75313.0 /TIER=FL+Stack /STK=142 /UG=Hs.75313 /LL=231 /DEF=Homo sapiens aldo-keto reductase family 1, member B1 (aldose reductase) (AKR1B1), mRNA. /PROD=aldo-keto reductase family 1, member B1 (aldosereductase) /FL=gb:M34720.1 gb:NM_001628.1 gb:BC000260.1 gb:J04795.1 gb:J05474.1 gb:J05017.1 gb:BC005387.1
NOV	214321_at	4.05378e-09	8.37818e-12	-1.17978	-0.238513	1.17978	down	-7.68462	-2.94197	7.68462	down	0.187984	-0.0505296	-2.75399	4856	Hs.235935	gb:BF440025 /DB_XREF=gi:11452542 /DB_XREF=nac52c12.x1 /CLONE=IMAGE:3406079 /FEA=EST /CNT=12 /TID=Hs.235935.1 /TIER=Stack /STK=8 /UG=Hs.235935 /LL=4856 /UG_GENE=NOV /UG_TITLE=nephroblastoma overexpressed gene
CNIH4	223993_s_at	4.05378e-09	8.36466e-12	3.15838	1.65919	3.15838	up	6.36946	2.67117	6.36946	up	-0.500012	1.15917	2.17116	29097	Hs.445890	gb:AL136930.1 /DB_XREF=gi:12053354 /GEN=DKFZp586E1222 /FEA=FLmRNA /CNT=4 /TID=Hs.108854.1 /TIER=FL /STK=3 /UG=Hs.108854 /LL=29097 /DEF=Homo sapiens mRNA; cDNA DKFZp586E1222 (from clone DKFZp586E1222); complete cds. /PROD=hypothetical protein /FL=gb:AL136930.1
CST7	210140_at	4.12788e-09	8.61604e-12	2.10146	1.07139	2.10146	up	6.17397	2.6262	6.17397	up	-0.467896	0.603497	2.1583	8530	Hs.143212	gb:AF031824.1 /DB_XREF=gi:3252857 /FEA=FLmRNA /CNT=26 /TID=Hs.143212.0 /TIER=FL+Stack /STK=10 /UG=Hs.143212 /LL=8530 /UG_GENE=CST7 /DEF=Homo sapiens leukocystatin mRNA, complete cds. /PROD=leukocystatin /FL=gb:AF036342.1 gb:NM_003650.1 gb:AF031824.1 gb:AB015225.1
KIF1B	226968_at	4.12788e-09	8.68233e-12	3.31367	1.72843	3.31367	up	4.73629	2.24376	4.73629	up	-0.698766	1.02967	1.54499	23095	Hs.97858	gb:AK023184.1 /DB_XREF=gi:10434997 /FEA=mRNA /CNT=48 /TID=Hs.32580.0 /TIER=Stack /STK=17 /UG=Hs.32580 /LL=57598 /UG_GENE=KIAA1448 /UG_TITLE=KIAA1448 protein /DEF=Homo sapiens cDNA FLJ13122 fis, clone NT2RP3002688, weakly similar to Mouse mRNA for kinesin-like protein (Kif1b).
QRSL1	218949_s_at	4.30054e-09	9.2028e-12	-1.52417	-0.608023	1.52417	down	-2.25361	-1.17224	2.25361	down	0.378449	-0.229574	-0.793788	55278	Hs.406917	gb:NM_018292.1 /DB_XREF=gi:8922807 /GEN=FLJ10989 /FEA=FLmRNA /CNT=62 /TID=Hs.210778.0 /TIER=FL /STK=0 /UG=Hs.210778 /LL=55278 /DEF=Homo sapiens hypothetical protein FLJ10989 (FLJ10989), mRNA. /PROD=hypothetical protein FLJ10989 /FL=gb:NM_018292.1 gb:AL136679.1
	241916_at	4.30054e-09	9.14127e-12	4.34034	2.11781	4.34034	up	4.52993	2.17949	4.52993	up	-0.788438	1.32937	1.39105		Hs.671285	gb:AI984040 /DB_XREF=gi:5811259 /DB_XREF=wt52f10.x1 /CLONE=IMAGE:2511115 /FEA=EST /CNT=4 /TID=Hs.226946.0 /TIER=ConsEnd /STK=3 /UG=Hs.226946 /UG_TITLE=ESTs
	239893_at	4.64888e-09	1.00332e-11	3.07736	1.6217	3.07736	up	3.2257	1.68961	3.2257	up	-0.485251	1.13644	1.20436		Hs.664781	gb:AA702409 /DB_XREF=gi:2705522 /DB_XREF=zi85a09.s1 /CLONE=IMAGE:447544 /FEA=EST /CNT=5 /TID=Hs.192075.0 /TIER=ConsEnd /STK=4 /UG=Hs.192075 /UG_TITLE=ESTs
BLOC1S1	202592_at	4.85277e-09	1.0562e-11	1.14316	0.193029	1.14316	up	3.30367	1.72407	3.30367	up	-0.168835	0.0241945	1.55523	2647	Hs.94672	gb:NM_001487.1 /DB_XREF=gi:4503954 /GEN=GCN5L1 /FEA=FLmRNA /CNT=153 /TID=Hs.94672.0 /TIER=FL+Stack /STK=72 /UG=Hs.94672 /LL=2647 /DEF=Homo sapiens GCN5 (general control of amino-acid synthesis, yeast, homolog)-like 1 (GCN5L1), mRNA. /PROD=GCN5 (general control of amino-acid synthesis,yeast, homolog)-like 1 /FL=gb:NM_001487.1 gb:D64007.1
MXI1	202364_at	4.94328e-09	1.08494e-11	3.17731	1.6678	3.17731	up	3.57073	1.83622	3.57073	up	-0.802109	0.865695	1.03411	4601	Hs.728542	gb:NM_005962.1 /DB_XREF=gi:5174596 /GEN=MXI1 /FEA=FLmRNA /CNT=169 /TID=Hs.118630.0 /TIER=FL+Stack /STK=44 /UG=Hs.118630 /LL=4601 /DEF=Homo sapiens MAX-interacting protein 1 (MXI1), mRNA. /PROD=MAX-interacting protein 1 /FL=gb:L07648.1 gb:D63940.1 gb:NM_005962.1
FCMR	221601_s_at	5.14729e-09	1.14855e-11	-3.09825	-1.63145	3.09825	down	-5.03494	-2.33198	5.03494	down	0.485776	-1.14568	-1.8462	9214	Hs.744273	gb:AI084226 /DB_XREF=gi:3422649 /DB_XREF=oy72g09.x1 /CLONE=IMAGE:1671424 /FEA=FLmRNA /CNT=75 /TID=Hs.58831.0 /TIER=Stack /STK=27 /UG=Hs.58831 /LL=9214 /UG_GENE=TOSO /UG_TITLE=regulator of Fas-induced apoptosis /FL=gb:NM_005449.1 gb:AF057557.1
JAK1	1552611_a_at	5.14729e-09	1.14218e-11	-3.11315	-1.63837	3.11315	down	-1.50903	-0.593618	1.50903	down	0.435162	-1.20321	-0.158456	3716	Hs.207538	gb:AL555086 /DB_XREF=gi:12896484 /DB_XREF=AL555086 /CLONE=CS0DK007YI17 (5 prime) /TID=Hs2.50651.1 /CNT=135 /FEA=FLmRNA /TIER=Stack /STK=12 /LL=3716 /UG_GENE=JAK1 /UG=Hs.50651 /UG_TITLE=Janus kinase 1 (a protein tyrosine kinase) /FL=gb:M64174.1 gb:NM_002227.1
GYG1	211275_s_at	5.15778e-09	1.16976e-11	4.23457	2.08222	4.23457	up	10.7871	3.43123	10.7871	up	-0.443379	1.63884	2.98785	2992	Hs.477892	gb:AF087942.1 /DB_XREF=gi:5814084 /FEA=FLmRNA /CNT=1 /TID=Hs.174071.1 /TIER=FL /STK=0 /UG=Hs.174071 /LL=2992 /UG_GENE=GYG /DEF=Homo sapiens glycogenin-1L mRNA, complete cds. /PROD=glycogenin-1L /FL=gb:AF087942.1
C20orf24///TGIF2-C20orf24	217835_x_at	5.15778e-09	1.16067e-11	1.95314	0.965796	1.95314	up	2.7943	1.48248	2.7943	up	-0.391129	0.574666	1.09136	55969///100527943	Hs.584985	gb:NM_018840.1 /DB_XREF=gi:10047115 /GEN=LOC55969 /FEA=FLmRNA /CNT=249 /TID=Hs.184062.0 /TIER=FL+Stack /STK=94 /UG=Hs.184062 /LL=55969 /DEF=Homo sapiens putative Rab5-interacting protein (LOC55969), mRNA. /PROD=putative Rab5-interacting protein /FL=gb:NM_018840.1 gb:AF112213.1 gb:AF274936.1
SNX3	208781_x_at	5.18705e-09	1.18588e-11	3.30652	1.72531	3.30652	up	4.33018	2.11443	4.33018	up	-0.78089	0.944422	1.33354	8724	Hs.12102	gb:AF062483.1 /DB_XREF=gi:3126978 /FEA=FLmRNA /CNT=355 /TID=Hs.12102.0 /TIER=FL /STK=2 /UG=Hs.12102 /LL=8724 /UG_GENE=SNX3 /DEF=Homo sapiens SDP3 mRNA, complete cds. /PROD=SDP3 /FL=gb:AF034546.1 gb:AF062483.1 gb:NM_003795.1
DACH1	205471_s_at	5.26767e-09	1.22211e-11	2.21937	1.15015	2.21937	up	3.98021	1.99285	3.98021	up	-0.545128	0.605024	1.44772	1602	Hs.129452	gb:AW772082 /DB_XREF=gi:7704144 /DB_XREF=hn67b07.x1 /CLONE=IMAGE:3032917 /FEA=FLmRNA /CNT=52 /TID=Hs.63931.0 /TIER=Stack /STK=10 /UG=Hs.63931 /LL=1602 /UG_GENE=DACH /UG_TITLE=dachshund (Drosophila) homolog /FL=gb:AF102546.1 gb:NM_004392.1
MS4A4A	1555728_a_at	5.26767e-09	1.22358e-11	5.00027	2.32201	5.00027	up	20.97	4.39026	20.97	up	-0.93158	1.39043	3.45867	51338	Hs.325960	gb:AF354928.1 /DB_XREF=gi:15808758 /TID=Hs2.325960.4 /CNT=1 /FEA=FLmRNA /TIER=FL /STK=1 /LL=51338 /UG_GENE=MS4A4A /UG=Hs.325960 /DEF=Homo sapiens MS4A4A protein mRNA, complete cds, alternatively spliced. /PROD=MS4A4A protein /FL=gb:AF354928.1
CPEB4	224829_at	5.95111e-09	1.39322e-11	2.22488	1.15373	2.22488	up	3.62211	1.85683	3.62211	up	-0.662677	0.491048	1.19415	80315	Hs.127126	gb:AA772278 /DB_XREF=gi:2824061 /DB_XREF=ai42d03.s1 /CLONE=1359653 /FEA=mRNA /CNT=144 /TID=Hs.301444.0 /TIER=Stack /STK=10 /UG=Hs.301444 /LL=80315 /UG_GENE=KIAA1673 /UG_TITLE=KIAA1673
TRIM28	200990_at	6.1145e-09	1.44265e-11	-2.92501	-1.54844	2.92501	down	-2.77561	-1.47281	2.77561	down	0.605338	-0.943106	-0.867468	10155	Hs.467408	gb:NM_005762.1 /DB_XREF=gi:5032178 /GEN=TIF1B /FEA=FLmRNA /CNT=487 /TID=Hs.228059.0 /TIER=FL+Stack /STK=189 /UG=Hs.228059 /LL=10155 /DEF=Homo sapiens KRAB-associated protein 1 (TIF1B), mRNA. /PROD=KRAB-associated protein 1 /FL=gb:NM_005762.1 gb:U78773.1 gb:BC004978.1 gb:U95040.1
C20orf24///TGIF2-C20orf24	224376_s_at	6.27903e-09	1.49471e-11	2.11847	1.08302	2.11847	up	2.6356	1.39813	2.6356	up	-0.238411	0.844614	1.15972	55969///100527943	Hs.584985	gb:AF274948.1 /DB_XREF=gi:12751060 /FEA=FLmRNA /CNT=1 /TID=HsAffx.900549.497 /TIER=FL /STK=0 /DEF=Homo sapiens PNAS-23 mRNA, complete cds. /PROD=PNAS-23 /FL=gb:AF274948.1
METTL7B	227055_at	6.27903e-09	1.50444e-11	2.80751	1.48929	2.80751	up	19.0735	4.2535	19.0735	up	-0.8589	0.630394	3.3946	196410	Hs.51483	gb:AI827972 /DB_XREF=gi:5448730 /DB_XREF=wk31c11.x1 /CLONE=IMAGE:2413940 /FEA=EST /CNT=33 /TID=Hs.51483.0 /TIER=Stack /STK=18 /UG=Hs.51483 /UG_TITLE=ESTs, Weakly similar to hypothetical protein (H.sapiens)
GPR84	223767_at	6.31933e-09	1.52805e-11	3.61384	1.85353	3.61384	up	18.1978	4.1857	18.1978	up	-0.765593	1.08794	3.4201	53831	Hs.306199	gb:AF237762.1 /DB_XREF=gi:12711470 /GEN=GPR84 /FEA=FLmRNA /CNT=17 /TID=Hs.306199.0 /TIER=FL+Stack /STK=11 /UG=Hs.306199 /LL=53831 /DEF=Homo sapiens orphan G protein-coupled receptor 84 (GPR84) mRNA, complete cds. /PROD=orphan G protein-coupled receptor 84 /FL=gb:AF282693.1 gb:NM_020370.1 gb:AF237762.1
FOXO3	224891_at	6.31933e-09	1.53721e-11	2.81297	1.49209	2.81297	up	3.07515	1.62065	3.07515	up	-0.75144	0.740652	0.869215	2309	Hs.220950///Hs.592126	gb:AV725666 /DB_XREF=gi:10831283 /DB_XREF=AV725666 /CLONE=HTCAOD09 /FEA=mRNA /CNT=121 /TID=Hs.214783.0 /TIER=Stack /STK=41 /UG=Hs.214783 /UG_TITLE=Homo sapiens cDNA FLJ14041 fis, clone HEMBA1005780
SEC24A	212902_at	6.75648e-09	1.65591e-11	1.53626	0.61942	1.53626	up	2.96125	1.56621	2.96125	up	-0.319485	0.299934	1.24672	10802	Hs.595540	gb:BE645231 /DB_XREF=gi:9969542 /DB_XREF=7e66g08.x1 /CLONE=IMAGE:3287486 /FEA=mRNA /CNT=73 /TID=Hs.211612.0 /TIER=Stack /STK=10 /UG=Hs.211612 /LL=10802 /UG_GENE=SEC24A /UG_TITLE=SEC24 (S. cerevisiae) related gene family, member A
TLR5	210166_at	6.81639e-09	1.68322e-11	2.38568	1.2544	2.38568	up	6.03815	2.59411	6.03815	up	-0.448538	0.805865	2.14557	7100	Hs.604542	gb:AF051151.1 /DB_XREF=gi:3132525 /GEN=TIL3 /FEA=FLmRNA /CNT=15 /TID=Hs.114408.0 /TIER=FL /STK=6 /UG=Hs.114408 /LL=7100 /DEF=Homo sapiens Tollinterleukin-1 receptor-like protein 3 (TIL3) mRNA, complete cds. /PROD=Tollinterleukin-1 receptor-like protein 3 /FL=gb:AF051151.1
C5orf24	1553107_s_at	6.81639e-09	1.69553e-11	-2.58617	-1.37082	2.58617	down	1.15528	0.208243	1.15528	up	0.0801121	-1.29071	0.288355	134553	Hs.708536	gb:BF436799 /DB_XREF=gi:11449114 /DB_XREF=7p64d01.x1 /CLONE=IMAGE:3650712 /TID=Hs2.406549.1 /CNT=63 /FEA=FLmRNA /TIER=Stack /STK=8 /LL=134553 /UG_GENE=FLJ37562 /UG=Hs.406549 /UG_TITLE=hypothetical protein FLJ37562 /FL=gb:NM_152409.1
PATZ1	209494_s_at	6.85098e-09	1.71666e-11	-1.71008	-0.774067	1.71008	down	-2.5408	-1.34528	2.5408	down	0.462245	-0.311822	-0.883036	23598	Hs.731398	gb:AI807017 /DB_XREF=gi:5393583 /DB_XREF=wf37b07.x1 /CLONE=IMAGE:2357749 /FEA=FLmRNA /CNT=77 /TID=Hs.27801.2 /TIER=Stack /STK=34 /UG=Hs.27801 /LL=23598 /UG_GENE=ZNF278 /UG_TITLE=zinc finger protein 278 /FL=gb:AF254086.1
ARG1	206177_s_at	6.91359e-09	1.74499e-11	25.5363	4.67448	25.5363	up	34.6435	5.11451	34.6435	up	-1.43403	3.24045	3.68048	383	Hs.440934	gb:NM_000045.2 /DB_XREF=gi:10947138 /GEN=ARG1 /FEA=FLmRNA /CNT=36 /TID=Hs.289057.0 /TIER=FL+Stack /STK=13 /UG=Hs.289057 /LL=383 /DEF=Homo sapiens arginase, liver (ARG1), mRNA. /PROD=arginase, type I /FL=gb:M14502.1 gb:NM_000045.2
FAM162A	223193_x_at	7.05959e-09	1.79476e-11	-2.27828	-1.18795	2.27828	down	-2.65279	-1.40751	2.65279	down	0.455029	-0.732917	-0.95248	26355	Hs.584881	gb:AF201944.1 /DB_XREF=gi:9295191 /GEN=HGTD-P /FEA=FLmRNA /CNT=159 /TID=Hs.5243.1 /TIER=FL+Stack /STK=85 /UG=Hs.5243 /LL=26355 /DEF=Homo sapiens HGTD-P (HGTD-P) mRNA, complete cds. /PROD=HGTD-P /FL=gb:AF201944.1 gb:AF250321.1
PGK1	200738_s_at	7.09389e-09	1.82943e-11	1.69359	0.760085	1.69359	up	2.30789	1.20657	2.30789	up	-0.191245	0.56884	1.01533	5230	Hs.78771	gb:NM_000291.1 /DB_XREF=gi:4505762 /GEN=PGK1 /FEA=FLmRNA /CNT=450 /TID=Hs.78771.0 /TIER=FL+Stack /STK=249 /UG=Hs.78771 /LL=5230 /DEF=Homo sapiens phosphoglycerate kinase 1 (PGK1), mRNA. /PROD=phosphoglycerate kinase 1 /FL=gb:NM_000291.1
RAB27A	209514_s_at	7.09389e-09	1.82201e-11	2.2663	1.18034	2.2663	up	4.54293	2.18362	4.54293	up	-0.389272	0.791066	1.79435	5873	Hs.654978	gb:BE502030 /DB_XREF=gi:9704438 /DB_XREF=hy11d05.x1 /CLONE=IMAGE:3197001 /FEA=FLmRNA /CNT=83 /TID=Hs.50477.1 /TIER=Stack /STK=12 /UG=Hs.50477 /LL=5873 /UG_GENE=RAB27A /UG_TITLE=RAB27A, member RAS oncogene family /FL=gb:U38654.3
DAZAP1	218443_s_at	7.1e-09	1.84399e-11	-2.42403	-1.27741	2.42403	down	-1.18576	-0.245808	1.18576	down	0.157612	-1.11979	-0.0881958	26528	Hs.222510	gb:NM_018959.1 /DB_XREF=gi:9506536 /GEN=DAZAP1 /FEA=FLmRNA /CNT=88 /TID=Hs.65588.0 /TIER=FL+Stack /STK=25 /UG=Hs.65588 /LL=26528 /DEF=Homo sapiens DAZ associated protein 1 (DAZAP1), mRNA. /PROD=DAZ associated protein 1 /FL=gb:AF181719.1 gb:NM_018959.1
RAB27A	210951_x_at	7.25709e-09	1.91497e-11	1.98975	0.992589	1.98975	up	4.56262	2.18986	4.56262	up	-0.414331	0.578257	1.77553	5873	Hs.654978	gb:AF125393.1 /DB_XREF=gi:5410356 /FEA=FLmRNA /CNT=2 /TID=Hs.50477.2 /TIER=FL /STK=0 /UG=Hs.50477 /LL=5873 /UG_GENE=RAB27A /DEF=Homo sapiens Rab27 isoform mRNA, complete cds. /PROD=Rab27 isoform /FL=gb:AF125393.1
TDRD9	228285_at	7.25709e-09	1.9031e-11	2.60234	1.37981	2.60234	up	11.9145	3.57465	11.9145	up	-0.499845	0.879964	3.0748	122402	Hs.21454	gb:AI989706 /DB_XREF=gi:5836587 /DB_XREF=ws35e10.x1 /CLONE=IMAGE:2499210 /FEA=EST /CNT=28 /TID=Hs.21454.0 /TIER=Stack /STK=18 /UG=Hs.21454 /UG_TITLE=ESTs
	241093_at	7.25709e-09	1.9246e-11	-2.68118	-1.42287	2.68118	down	-1.31115	-0.390837	1.31115	down	0.319749	-1.10312	-0.0710887		Hs.655985	gb:T91323 /DB_XREF=gi:723236 /DB_XREF=yd52h05.s1 /CLONE=IMAGE:111897 /FEA=EST /CNT=4 /TID=Hs.178536.1 /TIER=ConsEnd /STK=4 /UG=Hs.178536 /UG_TITLE=ESTs
S100A6	217728_at	7.36559e-09	1.97403e-11	1.28647	0.363414	1.28647	up	3.39309	1.7626	3.39309	up	-0.335576	0.0278376	1.42702	6277	Hs.275243	gb:NM_014624.2 /DB_XREF=gi:9845517 /GEN=S100A6 /FEA=FLmRNA /CNT=477 /TID=Hs.275243.0 /TIER=FL+Stack /STK=200 /UG=Hs.275243 /LL=6277 /DEF=Homo sapiens S100 calcium-binding protein A6 (calcyclin) (S100A6), mRNA. /PROD=S100 calcium-binding protein A6 /FL=gb:NM_014624.2 gb:BC001431.1
	237071_at	7.36559e-09	1.98032e-11	2.66002	1.41144	2.66002	up	4.48735	2.16586	4.48735	up	-0.602188	0.80925	1.56367		Hs.485241	gb:AI342132 /DB_XREF=gi:4079059 /DB_XREF=qt26c08.x1 /CLONE=IMAGE:1949102 /FEA=EST /CNT=13 /TID=Hs.156499.0 /TIER=ConsEnd /STK=2 /UG=Hs.156499 /UG_TITLE=ESTs
CKAP4	200999_s_at	7.3928e-09	2.00116e-11	3.03234	1.60043	3.03234	up	6.61489	2.72572	6.61489	up	-0.871694	0.728737	1.85402	10970	Hs.74368	gb:NM_006825.1 /DB_XREF=gi:5803112 /GEN=P63 /FEA=FLmRNA /CNT=354 /TID=Hs.74368.0 /TIER=FL+Stack /STK=141 /UG=Hs.74368 /LL=10970 /DEF=Homo sapiens transmembrane protein (63kD), endoplasmic reticulumGolgi intermediate compartment (P63), mRNA. /PROD=transmembrane protein (63kD), endoplasmicreticulumGolgi intermediate compartment /FL=gb:NM_006825.1
GLA	214430_at	7.42219e-09	2.02269e-11	1.42732	0.513313	1.42732	up	2.05199	1.03702	2.05199	up	-0.312981	0.200332	0.724041	2717	Hs.69089	gb:NM_000169.1 /DB_XREF=gi:4504008 /GEN=GLA /FEA=FLmRNA /CNT=95 /TID=Hs.69089.0 /TIER=FL /STK=0 /UG=Hs.69089 /LL=2717 /DEF=Homo sapiens galactosidase, alpha (GLA), mRNA. /PROD=galactosidase, alpha /FL=gb:NM_000169.1 gb:BC002689.1
CCNDBP1	223084_s_at	7.62476e-09	2.09184e-11	2.69713	1.43142	2.69713	up	2.16342	1.11331	2.16342	up	-0.314017	1.11741	0.799297	23582	Hs.36794	gb:AF246144.1 /DB_XREF=gi:7677485 /FEA=FLmRNA /CNT=164 /TID=Hs.36794.1 /TIER=FL /STK=5 /UG=Hs.36794 /LL=23582 /UG_GENE=DIP1 /DEF=Homo sapiens grap2 cyclin D interacting protein GCIP mRNA, complete cds. /PROD=grap2 cyclin D interacting protein GCIP /FL=gb:NM_012142.1 gb:AF132034.1 gb:AF082569.1 gb:AF246144.1
SLC2A3	202499_s_at	8.02154e-09	2.21537e-11	2.13602	1.09493	2.13602	up	5.2823	2.40117	5.2823	up	-0.537388	0.55754	1.86378	6515	Hs.419240	gb:NM_006931.1 /DB_XREF=gi:5902089 /GEN=SLC2A3 /FEA=FLmRNA /CNT=182 /TID=Hs.7594.0 /TIER=FL+Stack /STK=47 /UG=Hs.7594 /LL=6515 /DEF=Homo sapiens solute carrier family 2 (facilitated glucose transporter), member 3 (SLC2A3), mRNA. /PROD=solute carrier family 2 (facilitated glucosetransporter), member 3 /FL=gb:NM_006931.1 gb:M20681.1
SERPINB1	213572_s_at	8.183e-09	2.27493e-11	3.4417	1.78312	3.4417	up	4.93555	2.30321	4.93555	up	-0.542564	1.24056	1.76065	1992	Hs.381167	gb:AI554300 /DB_XREF=gi:4486663 /DB_XREF=tq05e07.x1 /CLONE=IMAGE:2207940 /FEA=EST /CNT=26 /TID=Hs.183583.1 /TIER=Stack /STK=23 /UG=Hs.183583 /LL=1992 /UG_GENE=SERPINB1 /UG_TITLE=serine (or cysteine) proteinase inhibitor, clade B (ovalbumin), member 1
PABPC4	201064_s_at	8.27658e-09	2.3462e-11	-2.09076	-1.06403	2.09076	down	-2.28765	-1.19386	2.28765	down	0.43263	-0.631399	-0.761235	8761	Hs.169900	gb:NM_003819.2 /DB_XREF=gi:6552335 /GEN=PABPC4 /FEA=FLmRNA /CNT=296 /TID=Hs.169900.0 /TIER=FL+Stack /STK=93 /UG=Hs.169900 /LL=8761 /DEF=Homo sapiens poly(A)-binding protein, cytoplasmic 4 (inducible form) (PABPC4), mRNA. /PROD=poly(A)-binding protein, cytoplasmic 4(inducible form) /FL=gb:NM_003819.2
DHRS7B	220690_s_at	8.27658e-09	2.34635e-11	2.16087	1.11162	2.16087	up	1.5735	0.65398	1.5735	up	-0.363104	0.748511	0.290876	25979	Hs.386989	gb:NM_015510.1 /DB_XREF=gi:7661657 /GEN=DKFZP566O084 /FEA=FLmRNA /CNT=4 /TID=Hs.278904.0 /TIER=FL /STK=0 /UG=Hs.278904 /LL=25979 /DEF=Homo sapiens DKFZP566O084 protein (DKFZP566O084), mRNA. /PROD=DKFZP566O084 protein /FL=gb:AL117567.1 gb:NM_015510.1
GSTO1	1557915_s_at	8.27658e-09	2.33291e-11	1.42081	0.506709	1.42081	up	3.14672	1.65385	3.14672	up	-0.41279	0.0939196	1.24106	9446	Hs.190028	gb:U56250.1 /DB_XREF=gi:1336021 /TID=Hs2.418464.1 /CNT=48 /FEA=mRNA /TIER=ConsEnd /STK=0 /UG=Hs.418464 /UG_TITLE=Human HeLa mRNA isolated as a false positive in a two-hybrid-screen. /DEF=Human HeLa mRNA isolated as a false positive in a two-hybrid-screen.
ENTPD1	207691_x_at	8.30296e-09	2.36902e-11	3.37881	1.75651	3.37881	up	1.97313	0.980484	1.97313	up	-0.504435	1.25208	0.476049	953	Hs.576612	gb:NM_001776.1 /DB_XREF=gi:4502666 /GEN=ENTPD1 /FEA=FLmRNA /CNT=4 /TID=Hs.205353.0 /TIER=FL /STK=0 /UG=Hs.205353 /LL=953 /DEF=Homo sapiens ectonucleoside triphosphate diphosphohydrolase 1 (ENTPD1), mRNA. /PROD=ectonucleoside triphosphate diphosphohydrolase1 /FL=gb:NM_001776.1
HMGA1	206074_s_at	8.76457e-09	2.51676e-11	-2.90056	-1.53633	2.90056	down	-1.6285	-0.703541	1.6285	down	0.303053	-1.23328	-0.400487	3159	Hs.518805///Hs.703764	gb:NM_002131.1 /DB_XREF=gi:4504432 /GEN=HMGIY /FEA=FLmRNA /CNT=54 /TID=Hs.139800.0 /TIER=FL /STK=0 /UG=Hs.139800 /LL=3159 /DEF=Homo sapiens high-mobility group (nonhistone chromosomal) protein isoforms I and Y (HMGIY), mRNA. /PROD=high-mobility group (nonhistone chromosomal)protein isoforms I and Y /FL=gb:NM_002131.1 gb:BC004924.1
PEBP1	210825_s_at	9.01058e-09	2.60388e-11	-3.73372	-1.90061	3.73372	down	-3.01869	-1.59392	3.01869	down	0.624174	-1.27644	-0.96975	5037	Hs.433863	gb:AF130103.1 /DB_XREF=gi:11493509 /FEA=FLmRNA /CNT=2 /TID=Hs.160483.1 /TIER=FL /STK=0 /UG=Hs.160483 /LL=2040 /UG_GENE=EPB72 /DEF=Homo sapiens clone FLB2914 PRO0720 mRNA, complete cds. /PROD=PRO0720 /FL=gb:AF130103.1
BST1	205715_at	9.26997e-09	2.69579e-11	2.85095	1.51144	2.85095	up	4.9614	2.31075	4.9614	up	-0.476607	1.03484	1.83414	683	Hs.720344	gb:NM_004334.1 /DB_XREF=gi:4757873 /GEN=BST1 /FEA=FLmRNA /CNT=43 /TID=Hs.169998.0 /TIER=FL+Stack /STK=21 /UG=Hs.169998 /LL=683 /DEF=Homo sapiens bone marrow stromal cell antigen 1 (BST1), mRNA. /PROD=bone marrow stromal cell antigen 1 precursor /FL=gb:D21878.1 gb:NM_004334.1
ZDHHC3	218077_s_at	9.55169e-09	2.79519e-11	1.41956	0.505446	1.41956	up	2.30528	1.20494	2.30528	up	-0.311871	0.193575	0.893071	51304	Hs.61430	gb:BE542551 /DB_XREF=gi:9771196 /DB_XREF=601063935F1 /CLONE=IMAGE:3450249 /FEA=FLmRNA /CNT=173 /TID=Hs.14896.0 /TIER=Stack /STK=34 /UG=Hs.14896 /LL=51304 /UG_GENE=LOC51304 /UG_TITLE=DHHC1 protein /FL=gb:NM_016598.1 gb:AF247703.1
TNFRSF25	210847_x_at	9.61714e-09	2.83193e-11	-4.67081	-2.22367	4.67081	down	-11.987	-3.5834	11.987	down	0.526377	-1.6973	-3.05703	8718	Hs.462529	gb:AF026071.1 /DB_XREF=gi:2570832 /GEN=DR3 /FEA=FLmRNA /CNT=2 /TID=Hs.180338.1 /TIER=FL /STK=0 /UG=Hs.180338 /LL=8718 /DEF=Homo sapiens soluble death receptor 3 beta (DR3) mRNA, complete cds. /PROD=soluble death receptor 3 beta /FL=gb:AF026071.1
LDHB	201030_x_at	9.77263e-09	2.89559e-11	-2.57003	-1.36179	2.57003	down	-3.21687	-1.68566	3.21687	down	0.578866	-0.782921	-1.10679	3945	Hs.446149	gb:NM_002300.1 /DB_XREF=gi:4557031 /GEN=LDHB /FEA=FLmRNA /CNT=490 /TID=Hs.234489.0 /TIER=FL+Stack /STK=218 /UG=Hs.234489 /LL=3945 /DEF=Homo sapiens lactate dehydrogenase B (LDHB), mRNA. /PROD=lactate dehydrogenase B /FL=gb:BC002362.1 gb:NM_002300.1
SLC26A8	237340_at	9.78097e-09	2.91595e-11	4.36929	2.1274	4.36929	up	5.17769	2.37231	5.17769	up	-1.27159	0.855811	1.10072	116369	Hs.435836	gb:BE551631 /DB_XREF=gi:9793243 /DB_XREF=hx96a08.x1 /CLONE=IMAGE:3195638 /FEA=EST /CNT=8 /TID=Hs.20969.0 /TIER=ConsEnd /STK=7 /UG=Hs.20969 /UG_TITLE=ESTs
PCMTD1	235507_at	1.03014e-08	3.08995e-11	-1.42276	-0.508691	1.42276	down	1.65765	0.729138	1.65765	up	0.035269	-0.473422	0.764407	115294	Hs.671268	gb:AA461195 /DB_XREF=gi:2186315 /DB_XREF=zx70f05.s1 /CLONE=IMAGE:796833 /FEA=EST /CNT=11 /TID=Hs.99580.0 /TIER=ConsEnd /STK=2 /UG=Hs.99580 /UG_TITLE=ESTs, Weakly similar to unnamed protein product (H.sapiens)
C20orf24///TGIF2-C20orf24	223880_x_at	1.05367e-08	3.17979e-11	1.76774	0.821903	1.76774	up	2.66992	1.4168	2.66992	up	-0.308064	0.513839	1.10873	55969///100527943	Hs.584985	gb:BC004446.1 /DB_XREF=gi:13325254 /FEA=FLmRNA /CNT=5 /TID=Hs.184062.2 /TIER=FL /STK=0 /UG=Hs.184062 /LL=55969 /UG_GENE=LOC55969 /DEF=Homo sapiens, Similar to putative Rab5-interacting protein, clone MGC:4099, mRNA, complete cds. /PROD=Similar to putative Rab5-interacting protein /FL=gb:BC004446.1
LEF1	210948_s_at	1.07659e-08	3.26865e-11	-3.78552	-1.92049	3.78552	down	-3.59615	-1.84645	3.59615	down	0.74715	-1.17334	-1.0993	51176	Hs.743478	gb:AF294627.1 /DB_XREF=gi:11024343 /GEN=LEF1 /FEA=FLmRNA /CNT=2 /TID=Hs.44865.0 /TIER=FL /STK=0 /UG=Hs.44865 /LL=51176 /DEF=Homo sapiens lymphoid enhancer factor 1 isoform (LEF1) mRNA, complete cds. /PROD=lymphoid enhancer factor 1 isoform /FL=gb:AF294627.1
EVL	217838_s_at	1.08908e-08	3.32651e-11	-3.10961	-1.63674	3.10961	down	-3.26626	-1.70764	3.26626	down	0.709586	-0.92715	-0.998053	51466	Hs.125867	gb:NM_016337.1 /DB_XREF=gi:7706686 /GEN=RNB6 /FEA=FLmRNA /CNT=260 /TID=Hs.241471.0 /TIER=FL+Stack /STK=133 /UG=Hs.241471 /LL=51466 /DEF=Homo sapiens RNB6 (RNB6), mRNA. /PROD=RNB6 /FL=gb:AF052504.1 gb:NM_016337.1
HLA-DMB	203932_at	1.10347e-08	3.39065e-11	-1.80682	-0.853454	1.80682	down	-2.73643	-1.45229	2.73643	down	0.441541	-0.411913	-1.01075	3109	Hs.351279	gb:NM_002118.1 /DB_XREF=gi:4504398 /GEN=HLA-DMB /FEA=FLmRNA /CNT=91 /TID=Hs.1162.0 /TIER=FL+Stack /STK=49 /UG=Hs.1162 /LL=3109 /DEF=Homo sapiens major histocompatibility complex, class II, DM beta (HLA-DMB), mRNA. /PROD=major histocompatibility complex, class II, DMbeta /FL=gb:NM_002118.1 gb:U15085.1
H2AFJ	224301_x_at	1.12146e-08	3.48694e-11	1.70778	0.772121	1.70778	up	2.28384	1.19146	2.28384	up	-0.378432	0.393689	0.813029	55766	Hs.524280	gb:BC003602.1 /DB_XREF=gi:13097821 /FEA=FLmRNA /CNT=1 /TID=Hs.36727.1 /TIER=FL /STK=0 /UG=Hs.36727 /LL=55766 /UG_GENE=FLJ10903 /DEF=Homo sapiens, Similar to H2A histone family, member O, clone MGC:921, mRNA, complete cds. /PROD=Similar to H2A histone family, member O /FL=gb:BC003602.1
ACER3	227776_at	1.12146e-08	3.47003e-11	1.80019	0.848147	1.80019	up	5.30008	2.40601	5.30008	up	-0.355442	0.492705	2.05057	55331	Hs.23862	gb:BF589251 /DB_XREF=gi:11681575 /DB_XREF=nab29d09.x1 /CLONE=IMAGE:3267137 /FEA=EST /CNT=23 /TID=Hs.27172.0 /TIER=Stack /STK=12 /UG=Hs.27172 /UG_TITLE=ESTs
2006-03-01	201736_s_at	1.13462e-08	3.55022e-11	2.16572	1.11484	2.16572	up	1.85666	0.892712	1.85666	up	-0.385135	0.729709	0.507577	10299	Hs.432862	gb:BF000409 /DB_XREF=gi:10700684 /DB_XREF=7h27h07.x1 /CLONE=IMAGE:3317245 /FEA=FLmRNA /CNT=237 /TID=Hs.20141.0 /TIER=Stack /STK=47 /UG=Hs.20141 /LL=10299 /UG_GENE=TEB4 /UG_TITLE=similar to S. cerevisiae SSM4 /FL=gb:AF009301.1 gb:NM_005885.1
GADD45A	203725_at	1.13462e-08	3.56935e-11	5.18665	2.3748	5.18665	up	10.5484	3.39896	10.5484	up	-0.729781	1.64502	2.66918	1647	Hs.80409	gb:NM_001924.2 /DB_XREF=gi:9790904 /GEN=GADD45A /FEA=FLmRNA /CNT=108 /TID=Hs.80409.0 /TIER=FL+Stack /STK=63 /UG=Hs.80409 /LL=1647 /DEF=Homo sapiens growth arrest and DNA-damage-inducible, alpha (GADD45A), mRNA. /PROD=growth arrest and DNA-damage-inducible, alpha /FL=gb:M60974.1 gb:NM_001924.2
	231644_at	1.18411e-08	3.7467e-11	4.96633	2.31218	4.96633	up	4.39811	2.13688	4.39811	up	-0.8767	1.43548	1.26018			gb:AW016812 /DB_XREF=gi:5865569 /DB_XREF=UI-H-BI0-aam-c-06-0-UI.s1 /CLONE=IMAGE:2709874 /FEA=EST /CNT=8 /TID=Hs.200266.0 /TIER=Stack /STK=8 /UG=Hs.200266 /UG_TITLE=ESTs
MMP8	231688_at	1.20595e-08	3.83787e-11	12.6778	3.66423	12.6778	up	149.562	7.2246	149.562	up	-1.69297	1.97126	5.53163	4317	Hs.161839	gb:AW337833 /DB_XREF=gi:6834459 /DB_XREF=he11a05.x1 /CLONE=IMAGE:2918672 /FEA=EST /CNT=11 /TID=Hs.255877.0 /TIER=Stack /STK=10 /UG=Hs.255877 /UG_TITLE=ESTs
MAPK14	211561_x_at	1.23141e-08	3.9414e-11	3.47644	1.79761	3.47644	up	3.84142	1.94164	3.84142	up	-0.605557	1.19205	1.33608	1432	Hs.485233	gb:L35253.1 /DB_XREF=gi:529039 /FEA=FLmRNA /CNT=1 /TID=Hs.79107.2 /TIER=FL /STK=0 /UG=Hs.79107 /LL=1432 /UG_GENE=MAPK14 /DEF=Human p38 mitogen activated protein (MAP) kinase mRNA, complete cds. /PROD=MAP kinase /FL=gb:L35253.1
LDHA	200650_s_at	1.25612e-08	4.10064e-11	2.50399	1.32423	2.50399	up	4.99602	2.32078	4.99602	up	-0.296167	1.02806	2.02461	3939	Hs.2795	gb:NM_005566.1 /DB_XREF=gi:5031856 /GEN=LDHA /FEA=FLmRNA /CNT=488 /TID=Hs.2795.0 /TIER=FL+Stack /STK=217 /UG=Hs.2795 /LL=3939 /DEF=Homo sapiens lactate dehydrogenase A (LDHA), mRNA. /PROD=LDHA /FL=gb:BC001829.1 gb:NM_005566.1
KLF5	209212_s_at	1.25612e-08	4.06372e-11	2.45501	1.29573	2.45501	up	2.49281	1.31777	2.49281	up	-0.617643	0.678084	0.700128	688	Hs.508234	gb:AB030824.1 /DB_XREF=gi:8272417 /GEN=bteb2 /FEA=FLmRNA /CNT=158 /TID=Hs.84728.0 /TIER=FL /STK=0 /UG=Hs.84728 /LL=688 /DEF=Homo sapiens mRNA for transcription factor BTEB2, complete cds. /PROD=transcription factor BTEB2 /FL=gb:AF132818.1 gb:AF287272.1 gb:AB030824.1 gb:NM_001730.1 gb:D14520.1
RBM4B	209497_s_at	1.25612e-08	4.12859e-11	-1.90493	-0.929739	1.90493	down	-1.99838	-0.998834	1.99838	down	0.46956	-0.460179	-0.529274	83759	Hs.618713	gb:BC003503.1 /DB_XREF=gi:13097557 /FEA=FLmRNA /CNT=77 /TID=Hs.49994.0 /TIER=FL /STK=0 /UG=Hs.49994 /DEF=Homo sapiens, Similar to RIKEN cDNA 4921506I22 gene, clone MGC:10380, mRNA, complete cds. /PROD=Similar to RIKEN cDNA 4921506I22 gene /FL=gb:BC004951.1 gb:BC003503.1
METTL9	230395_at	1.25612e-08	4.12734e-11	2.59351	1.37491	2.59351	up	4.36787	2.12693	4.36787	up	-0.517466	0.85744	1.60946	51108	Hs.709488	gb:AI536637 /DB_XREF=gi:4450772 /DB_XREF=ti80h03.x1 /CLONE=IMAGE:2138357 /FEA=EST /CNT=17 /TID=Hs.14411.0 /TIER=Stack /STK=8 /UG=Hs.14411 /UG_TITLE=ESTs
FAM20A	242945_at	1.25612e-08	4.13536e-11	4.09088	2.03241	4.09088	up	10.4083	3.37966	10.4083	up	-1.37983	0.652579	1.99983	54757	Hs.268874	gb:AI860568 /DB_XREF=gi:5514184 /DB_XREF=wl14f03.x1 /CLONE=IMAGE:2424893 /FEA=EST /CNT=5 /TID=Hs.310913.0 /TIER=ConsEnd /STK=1 /UG=Hs.310913 /UG_TITLE=ESTs
PYGL	202990_at	1.26229e-08	4.17877e-11	2.58312	1.36911	2.58312	up	3.08875	1.62702	3.08875	up	-0.565527	0.803586	1.0615	5836	Hs.282417	gb:NM_002863.1 /DB_XREF=gi:4506352 /GEN=PYGL /FEA=FLmRNA /CNT=104 /TID=Hs.771.0 /TIER=FL /STK=0 /UG=Hs.771 /LL=5836 /DEF=Homo sapiens phosphorylase, glycogen; liver (Hers disease, glycogen storage disease type VI) (PYGL), mRNA. /PROD=phosphorylase, glycogen; liver (Hers disease,glycogen storage disease type VI) /FL=gb:AF066858.1 gb:M14636.1 gb:AF046785.1 gb:NM_002863.1
BANF1	210125_s_at	1.31289e-08	4.39431e-11	-2.20566	-1.14121	2.20566	down	-1.43855	-0.524612	1.43855	down	0.271852	-0.869357	-0.25276	8815	Hs.433759	gb:AF044773.1 /DB_XREF=gi:3002950 /GEN=BCRG1 /FEA=FLmRNA /CNT=16 /TID=Hs.268763.1 /TIER=FL /STK=0 /UG=Hs.268763 /LL=8815 /DEF=Homo sapiens breakpoint cluster region protein 1 (BCRG1) mRNA, complete cds. /PROD=breakpoint cluster region protein 1 /FL=gb:AF044773.1
SERPINB1	212268_at	1.31289e-08	4.37189e-11	3.34106	1.7403	3.34106	up	6.62347	2.72759	6.62347	up	-0.503751	1.23655	2.22384	1992	Hs.381167	gb:NM_030666.1 /DB_XREF=gi:13489086 /GEN=SERPINB1 /FEA=FLmRNA /CNT=170 /TID=Hs.183583.0 /TIER=FL+Stack /STK=55 /UG=Hs.183583 /LL=1992 /DEF=Homo sapiens serine (or cysteine) proteinase inhibitor, clade B (ovalbumin), member 1 (SERPINB1), mRNA. /PROD=serine (or cysteine) proteinase inhibitor, cladeB (ovalbumin), member 1 /FL=gb:NM_030666.1
MAP3K14	205192_at	1.3184e-08	4.43687e-11	-1.9074	-0.931605	1.9074	down	-2.39268	-1.25863	2.39268	down	0.345317	-0.586288	-0.913313	9020	Hs.404183	gb:NM_003954.1 /DB_XREF=gi:4505396 /GEN=MAP3K14 /FEA=FLmRNA /CNT=38 /TID=Hs.47007.0 /TIER=FL+Stack /STK=17 /UG=Hs.47007 /LL=9020 /DEF=Homo sapiens mitogen-activated protein kinase kinase kinase 14 (MAP3K14), mRNA. /PROD=mitogen-activated protein kinase kinase kinase14 /FL=gb:NM_003954.1
	239131_at	1.32391e-08	4.47962e-11	1.16151	0.216003	1.16151	up	-2.59739	-1.37706	2.59739	down	0.0546233	0.270626	-1.32244		Hs.713187	gb:AI304862 /DB_XREF=gi:3988551 /DB_XREF=qo19f11.x1 /CLONE=IMAGE:1909005 /FEA=EST /CNT=8 /TID=Hs.12867.0 /TIER=ConsEnd /STK=4 /UG=Hs.12867 /UG_TITLE=ESTs
ATP11B	1564064_a_at	1.32696e-08	4.5142e-11	4.88904	2.28955	4.88904	up	7.31355	2.87057	7.31355	up	-0.584265	1.70529	2.28631	23200	Hs.478429	gb:AK093727.1 /DB_XREF=gi:21752654 /TID=Hs2.75478.5 /CNT=1 /FEA=mRNA /TIER=ConsEnd /STK=0 /LL=23200 /UG_GENE=ATP11B /UG=Hs.75478 /UG_TITLE=ATPase, Class VI, type 11B /DEF=Homo sapiens cDNA FLJ36408 fis, clone THYMU2010094, highly similar to POTENTIAL PHOSPHOLIPID-TRANSPORTING ATPASE IR (EC 3.6.1.-).
CARD6	224414_s_at	1.35416e-08	4.63151e-11	2.38244	1.25244	2.38244	up	3.89702	1.96237	3.89702	up	-0.575088	0.677353	1.38728	84674	Hs.200242	gb:AF356193.1 /DB_XREF=gi:13605448 /FEA=FLmRNA /CNT=1 /TID=HsAffx.900648.404 /TIER=FL /STK=0 /DEF=Homo sapiens caspase recruitment domain protein 6 mRNA, complete cds. /PROD=caspase recruitment domain protein 6 /FL=gb:AF356193.1
ABHD14B	224821_at	1.3759e-08	4.73104e-11	-2.91032	-1.54118	2.91032	down	-2.62639	-1.39308	2.62639	down	0.465669	-1.07551	-0.92741	84836	Hs.420796	gb:AL520200 /DB_XREF=gi:12783693 /DB_XREF=AL520200 /CLONE=CS0DB005YL14 (3 prime) /FEA=EST /CNT=152 /TID=Hs.79.1 /TIER=Stack /STK=74 /UG=Hs.79 /LL=95 /UG_GENE=ACY1 /UG_TITLE=aminoacylase 1
MAPK14	210449_x_at	1.38989e-08	4.80456e-11	3.78732	1.92118	3.78732	up	3.65062	1.86814	3.65062	up	-0.792254	1.12893	1.07589	1432	Hs.485233	gb:AF100544.1 /DB_XREF=gi:7109716 /GEN=CSBP /FEA=FLmRNA /CNT=9 /TID=Hs.79107.1 /TIER=FL /STK=0 /UG=Hs.79107 /LL=1432 /DEF=Homo sapiens stress-activated protein kinase 2a (CSBP) mRNA, complete cds. /PROD=stress-activated protein kinase 2a /FL=gb:L35264.1 gb:BC000092.1 gb:AF100544.1
AQP9	205568_at	1.40751e-08	4.89123e-11	2.21459	1.14704	2.21459	up	2.33768	1.22508	2.33768	up	-0.495965	0.651072	0.729113	366	Hs.104624	gb:NM_020980.2 /DB_XREF=gi:11038652 /GEN=AQP9 /FEA=FLmRNA /CNT=33 /TID=Hs.104624.0 /TIER=FL+Stack /STK=13 /UG=Hs.104624 /LL=366 /DEF=Homo sapiens aquaporin 9 (AQP9), mRNA. /PROD=aquaporin 9 /FL=gb:AF016495.1 gb:NM_020980.2 gb:AB008775.1
EIF4B	211937_at	1.41588e-08	4.94618e-11	-2.41781	-1.2737	2.41781	down	-1.41754	-0.503392	1.41754	down	0.358386	-0.915316	-0.145006	1975	Hs.648394	gb:NM_001417.1 /DB_XREF=gi:4503532 /GEN=EIF4B /FEA=FLmRNA /CNT=454 /TID=Hs.93379.0 /TIER=FL+Stack /STK=67 /UG=Hs.93379 /LL=1975 /DEF=Homo sapiens eukaryotic translation initiation factor 4B (EIF4B), mRNA. /PROD=eukaryotic translation initiation factor 4B /FL=gb:NM_001417.1
EIF3C///EIF3CL	200647_x_at	1.4444e-08	5.07225e-11	-2.32691	-1.21842	2.32691	down	-3.2864	-1.71651	3.2864	down	0.321147	-0.897271	-1.39536	8663///728689	Hs.535464///Hs.567374	gb:NM_003752.2 /DB_XREF=gi:5579457 /GEN=EIF3S8 /FEA=FLmRNA /CNT=477 /TID=Hs.4835.0 /TIER=FL /STK=0 /UG=Hs.4835 /LL=8663 /DEF=Homo sapiens eukaryotic translation initiation factor 3, subunit 8 (110kD) (EIF3S8), mRNA. /PROD=eukaryotic translation initiation factor 3,subunit 8 (110kD) /FL=gb:NM_003752.2
SPPL2A	226353_at	1.45833e-08	5.14784e-11	1.90793	0.932009	1.90793	up	2.91118	1.5416	2.91118	up	-0.373957	0.558053	1.16765	84888	Hs.401537	gb:AI674647 /DB_XREF=gi:4875127 /DB_XREF=wd18g05.x1 /CLONE=IMAGE:2328536 /FEA=mRNA /CNT=55 /TID=Hs.28980.0 /TIER=Stack /STK=19 /UG=Hs.28980 /UG_TITLE=Homo sapiens clone HQ0270
SGMS2	227038_at	1.47971e-08	5.25036e-11	3.2907	1.7184	3.2907	up	5.19204	2.3763	5.19204	up	-0.744581	0.973815	1.63172	166929	Hs.595423	gb:AI963083 /DB_XREF=gi:5755796 /DB_XREF=wt27a06.x1 /CLONE=IMAGE:2508658 /FEA=EST /CNT=37 /TID=Hs.29567.0 /TIER=Stack /STK=10 /UG=Hs.29567 /UG_TITLE=ESTs
NOG	231798_at	1.48877e-08	5.30973e-11	-11.0361	-3.46416	11.0361	down	-8.32663	-3.05773	8.32663	down	1.46682	-1.99734	-1.59091	9241	Hs.248201	gb:AL575177 /DB_XREF=gi:12936088 /DB_XREF=AL575177 /CLONE=CS0DI063YJ07 (3 prime) /FEA=FLmRNA /CNT=7 /TID=Hs.248201.0 /TIER=ConsEnd /STK=1 /UG=Hs.248201 /LL=9241 /UG_GENE=NOG /UG_TITLE=noggin /FL=gb:NM_005450.1
SECISBP2L	212451_at	1.5832e-08	5.67547e-11	-2.45593	-1.29627	2.45593	down	1.17879	0.23731	1.17879	up	0.0529717	-1.2433	0.290281	9728	Hs.9997	gb:N52532 /DB_XREF=gi:1193698 /DB_XREF=yv35b11.s1 /CLONE=IMAGE:244701 /FEA=mRNA /CNT=123 /TID=Hs.118978.0 /TIER=Stack /STK=14 /UG=Hs.118978 /LL=9728 /UG_GENE=KIAA0256 /UG_TITLE=KIAA0256 gene product
SOCS3	227697_at	1.58427e-08	5.7083e-11	3.77688	1.91719	3.77688	up	6.15448	2.62164	6.15448	up	-0.75885	1.15834	1.86279	9021	Hs.527973	gb:AI244908 /DB_XREF=gi:3840305 /DB_XREF=qj98g11.x1 /CLONE=IMAGE:1867556 /FEA=EST /CNT=26 /TID=Hs.311405.0 /TIER=Stack /STK=22 /UG=Hs.311405 /UG_TITLE=ESTs
TRABD2A	227867_at	1.62862e-08	5.89789e-11	-3.14995	-1.65533	3.14995	down	-4.19793	-2.06968	4.19793	down	0.624623	-1.0307	-1.44506	129293	Hs.469134	gb:AA005361 /DB_XREF=gi:1448394 /DB_XREF=zh97b01.s1 /CLONE=IMAGE:429193 /FEA=EST /CNT=42 /TID=Hs.36723.0 /TIER=Stack /STK=30 /UG=Hs.36723 /UG_TITLE=ESTs, Weakly similar to cDNA EST yk414c9.3 comes from this gene (C.elegans)
CKAP4	200998_s_at	1.65216e-08	6.01336e-11	1.86269	0.897385	1.86269	up	4.79051	2.26018	4.79051	up	-0.370114	0.527271	1.89006	10970	Hs.74368	gb:AW029619 /DB_XREF=gi:5888375 /DB_XREF=wx14e05.x1 /CLONE=IMAGE:2543648 /FEA=FLmRNA /CNT=354 /TID=Hs.74368.0 /TIER=Stack /STK=24 /UG=Hs.74368 /LL=10970 /UG_GENE=P63 /UG_TITLE=transmembrane protein (63kD), endoplasmic reticulumGolgi intermediate compartment /FL=gb:NM_006825.1
LGALS1	201105_at	1.6548e-08	6.05321e-11	1.69455	0.760904	1.69455	up	3.85032	1.94498	3.85032	up	-0.452384	0.30852	1.4926	3956	Hs.445351	gb:NM_002305.2 /DB_XREF=gi:6006015 /GEN=LGALS1 /FEA=FLmRNA /CNT=487 /TID=Hs.227751.0 /TIER=FL+Stack /STK=226 /UG=Hs.227751 /LL=3956 /DEF=Homo sapiens lectin, galactoside-binding, soluble, 1 (galectin 1) (LGALS1), mRNA. /PROD=beta-galactosidase binding lectin precursor /FL=gb:NM_002305.2 gb:BC001693.1 gb:J04456.1
SIKE1	221705_s_at	1.6571e-08	6.09196e-11	-2.57208	-1.36294	2.57208	down	1.29734	0.375552	1.29734	up	0.0629671	-1.29997	0.438519	80143	Hs.709277	gb:BC005934.1 /DB_XREF=gi:13543553 /FEA=FLmRNA /CNT=1 /TID=HsAffx.900774.974 /TIER=FL /STK=0 /DEF=Homo sapiens, hypothetical protein FLJ21168, clone MGC:14549, mRNA, complete cds. /PROD=hypothetical protein FLJ21168 /FL=gb:BC005934.1
GSTO1	201470_at	1.66506e-08	6.15164e-11	1.15773	0.2113	1.15773	up	3.13209	1.64713	3.13209	up	-0.232673	-0.0213734	1.41445	9446	Hs.190028	gb:NM_004832.1 /DB_XREF=gi:4758483 /GEN=GSTTLp28 /FEA=FLmRNA /CNT=299 /TID=Hs.11465.0 /TIER=FL+Stack /STK=156 /UG=Hs.11465 /LL=9446 /DEF=Homo sapiens glutathione-S-transferase like; glutathione transferase omega (GSTTLp28), mRNA. /PROD=glutathione-S-transferase like /FL=gb:AF212303.1 gb:NM_004832.1 gb:BC000127.1 gb:U90313.1
TSHZ3	223393_s_at	1.73938e-08	6.45806e-11	2.28028	1.18921	2.28028	up	4.09653	2.0344	4.09653	up	-0.603606	0.585606	1.4308	57616	Hs.278436	gb:AL136805.1 /DB_XREF=gi:12053120 /GEN=DKFZp434J1521 /FEA=FLmRNA /CNT=73 /TID=Hs.278436.0 /TIER=FL /STK=0 /UG=Hs.278436 /LL=57616 /DEF=Homo sapiens mRNA; cDNA DKFZp434J1521 (from clone DKFZp434J1521); complete cds. /PROD=hypothetical protein /FL=gb:AL136805.1
EIF4E3	225941_at	1.74281e-08	6.50265e-11	2.16522	1.11452	2.16522	up	3.62634	1.85851	3.62634	up	-0.45219	0.662325	1.40632	317649	Hs.581355	gb:AI935522 /DB_XREF=gi:5674392 /DB_XREF=wo97e02.x1 /CLONE=IMAGE:2463290 /FEA=mRNA /CNT=73 /TID=Hs.21415.1 /TIER=Stack /STK=23 /UG=Hs.21415 /LL=8547 /UG_GENE=FCN3 /UG_TITLE=ficolin (collagenfibrinogen domain-containing) 3 (Hakata antigen)
SFI1	36545_s_at	1.79932e-08	6.74643e-11	-2.06877	-1.04877	2.06877	down	-2.42691	-1.27912	2.42691	down	0.448059	-0.600716	-0.83106	9814	Hs.62209	Cluster Incl. AB011114:Homo sapiens mRNA for KIAA0542 protein, complete cds /cds=(393,3299) /gb=AB011114 /gi=3043607 /ug=Hs.62209 /len=5280
CLEC5A	219890_at	1.82878e-08	6.89033e-11	3.61462	1.85384	3.61462	up	14.4365	3.85165	14.4365	up	-1.14234	0.711504	2.70931	23601	Hs.446235	gb:NM_013252.1 /DB_XREF=gi:10281668 /GEN=CLECSF5 /FEA=FLmRNA /CNT=17 /TID=Hs.126355.0 /TIER=FL /STK=4 /UG=Hs.126355 /LL=23601 /DEF=Homo sapiens C-type (calcium dependent, carbohydrate-recognition domain) lectin, superfamily member 5 (CLECSF5), mRNA. /PROD=C-type (calcium dependent,carbohydrate-recognition domain) lectin, superfamilymember 5 /FL=gb:AF139768.1 gb:NM_013252.1
MS4A6A	224356_x_at	1.92557e-08	7.29022e-11	2.06712	1.04762	2.06712	up	3.32806	1.73468	3.32806	up	-0.391228	0.656392	1.34345	64231	Hs.523702	gb:AF237908.1 /DB_XREF=gi:13649404 /FEA=FLmRNA /CNT=1 /TID=HsAffx.900505.391 /TIER=FL /STK=0 /DEF=Homo sapiens MS4A6A protein mRNA, complete cds. /PROD=MS4A6A protein /FL=gb:AF237908.1
BCL6	203140_at	1.97739e-08	7.59492e-11	2.77853	1.47432	2.77853	up	3.83069	1.9376	3.83069	up	-0.45041	1.02391	1.48719	604	Hs.478588	gb:NM_001706.1 /DB_XREF=gi:4502382 /GEN=BCL6 /FEA=FLmRNA /CNT=123 /TID=Hs.155024.0 /TIER=FL+Stack /STK=54 /UG=Hs.155024 /LL=604 /DEF=Homo sapiens B-cell CLLlymphoma 6 (zinc finger protein 51) (BCL6), mRNA. /PROD=B-cell CLLlymphoma 6 (zinc finger protein 51) /FL=gb:U00115.1 gb:NM_001706.1
CLIC1	208659_at	1.97739e-08	7.58271e-11	1.98596	0.989838	1.98596	up	2.53343	1.34109	2.53343	up	-0.430352	0.559487	0.910738	1192	Hs.414565	gb:AF034607.1 /DB_XREF=gi:4426566 /FEA=FLmRNA /CNT=491 /TID=Hs.74276.0 /TIER=FL+Stack /STK=236 /UG=Hs.74276 /LL=1192 /UG_GENE=CLIC1 /DEF=Homo sapiens chloride channel ABP mRNA, complete cds. /PROD=chloride channel ABP /FL=gb:AF109197.1 gb:AF034607.1 gb:U93205.1 gb:NM_001288.2
TESPA1	219724_s_at	1.97739e-08	7.57546e-11	-2.48896	-1.31555	2.48896	down	-2.69196	-1.42866	2.69196	down	0.35317	-0.962375	-1.07549	9840	Hs.33187	gb:NM_014796.1 /DB_XREF=gi:7662281 /GEN=KIAA0748 /FEA=FLmRNA /CNT=26 /TID=Hs.33187.0 /TIER=FL /STK=0 /UG=Hs.33187 /LL=9840 /DEF=Homo sapiens KIAA0748 gene product (KIAA0748), mRNA. /PROD=KIAA0748 gene product /FL=gb:AB018291.1 gb:NM_014796.1
SLC22A4	205896_at	2.0369e-08	7.89801e-11	3.72586	1.89757	3.72586	up	3.40317	1.76688	3.40317	up	-0.710043	1.18753	1.05684	6583	Hs.310591	gb:NM_003059.1 /DB_XREF=gi:4507002 /GEN=SLC22A4 /FEA=FLmRNA /CNT=30 /TID=Hs.77239.0 /TIER=FL+Stack /STK=17 /UG=Hs.77239 /LL=6583 /DEF=Homo sapiens solute carrier family 22 (organic cation transporter), member 4 (SLC22A4), mRNA. /PROD=solute carrier family 22 (organic cationtransporter), member 4 /FL=gb:NM_003059.1 gb:AB007448.1
	232876_at	2.0369e-08	7.88194e-11	2.96425	1.56767	2.96425	up	3.15351	1.65696	3.15351	up	-0.882578	0.68509	0.77438		Hs.662175	gb:AK025534.1 /DB_XREF=gi:10438079 /FEA=mRNA /CNT=4 /TID=Hs.258010.0 /TIER=ConsEnd /STK=2 /UG=Hs.258010 /UG_TITLE=Homo sapiens cDNA: FLJ21881 fis, clone HEP02746 /DEF=Homo sapiens cDNA: FLJ21881 fis, clone HEP02746.
	242972_at	2.03815e-08	7.94014e-11	-2.97606	-1.5734	2.97606	down	-1.64604	-0.718997	1.64604	down	0.59706	-0.976342	-0.121937		Hs.663638	gb:AI022648 /DB_XREF=gi:3237889 /DB_XREF=ox05g04.x1 /CLONE=IMAGE:1655478 /FEA=EST /CNT=6 /TID=Hs.59970.0 /TIER=ConsEnd /STK=2 /UG=Hs.59970 /UG_TITLE=ESTs
FAM162A	224345_x_at	2.06802e-08	8.09432e-11	-2.60241	-1.37985	2.60241	down	-2.71045	-1.43853	2.71045	down	0.55878	-0.821067	-0.879754	26355	Hs.584881	gb:AF107495.1 /DB_XREF=gi:11640556 /FEA=FLmRNA /CNT=1 /TID=HsAffx.900474.389 /TIER=FL /STK=0 /DEF=Homo sapiens FWP001 and putative FWP002 mRNA, complete cds. /PROD=FWP001 /FL=gb:AF107495.1
LY9	215967_s_at	2.13748e-08	8.4122e-11	-2.68072	-1.42262	2.68072	down	-3.22736	-1.69035	3.22736	down	0.381251	-1.04137	-1.3091	4063	Hs.403857	gb:AL582804 /DB_XREF=gi:12951151 /DB_XREF=AL582804 /CLONE=CS0DL011YC18 (3 prime) /FEA=mRNA /CNT=3 /TID=Hs.153042.2 /TIER=ConsEnd /STK=2 /UG=Hs.153042 /LL=4063 /UG_GENE=LY9 /UG_TITLE=lymphocyte antigen 9
CMTM4	224998_at	2.13748e-08	8.44435e-11	1.35355	0.436745	1.35355	up	3.33853	1.73921	3.33853	up	-0.186281	0.250464	1.55293	146223	Hs.643961	gb:AK000855.1 /DB_XREF=gi:7021178 /FEA=mRNA /CNT=138 /TID=Hs.325825.0 /TIER=Stack /STK=56 /UG=Hs.325825 /UG_TITLE=Homo sapiens cDNA FLJ20848 fis, clone ADKA01732 /DEF=Homo sapiens cDNA FLJ20848 fis, clone ADKA01732.
SAMSN1	1555638_a_at	2.14254e-08	8.50353e-11	7.29113	2.86614	7.29113	up	7.37767	2.88316	7.37767	up	-0.881476	1.98467	2.00169	64092	Hs.473341	gb:AF519621.1 /DB_XREF=gi:21693567 /GEN=SAMSN1 /TID=Hs2.24633.3 /CNT=1 /FEA=FLmRNA /TIER=FL /STK=1 /LL=64092 /UG=Hs.24633 /DEF=Homo sapiens SAMSN1 variant b (SAMSN1) mRNA, complete cds; alternatively spliced. /PROD=SAMSN1 variant b /FL=gb:AF519621.1
FBXO16///ZNF395	232693_s_at	2.15645e-08	8.59819e-11	-9.02294	-3.1736	9.02294	down	-10.954	-3.45339	10.954	down	0.738984	-2.43461	-2.7144	55893///157574	Hs.435535	gb:AK021850.1 /DB_XREF=gi:10433123 /FEA=mRNA /CNT=5 /TID=Hs.27410.2 /TIER=ConsEnd /STK=0 /UG=Hs.27410 /LL=55893 /UG_GENE=LOC55893 /UG_TITLE=papillomavirus regulatory factor PRF-1 /DEF=Homo sapiens cDNA FLJ11788 fis, clone HEMBA1006081.
UCKL1	218533_s_at	2.15675e-08	8.63882e-11	-1.79253	-0.841999	1.79253	down	-1.78272	-0.834081	1.78272	down	0.428732	-0.413267	-0.405348	54963	Hs.504998	gb:NM_017859.1 /DB_XREF=gi:8923486 /GEN=FLJ20517 /FEA=FLmRNA /CNT=92 /TID=Hs.39850.0 /TIER=FL+Stack /STK=45 /UG=Hs.39850 /LL=54963 /DEF=Homo sapiens hypothetical protein FLJ20517 (FLJ20517), mRNA. /PROD=hypothetical protein FLJ20517 /FL=gb:NM_017859.1
PRKCH	218764_at	2.27321e-08	9.14691e-11	-1.72537	-0.786907	1.72537	down	-3.28136	-1.71429	3.28136	down	0.47299	-0.313917	-1.2413	5583	Hs.333907	gb:NM_024064.1 /DB_XREF=gi:13129041 /GEN=MGC5363 /FEA=FLmRNA /CNT=59 /TID=Hs.1880.0 /TIER=FL+Stack /STK=36 /UG=Hs.1880 /LL=79030 /DEF=Homo sapiens hypothetical protein MGC5363 (MGC5363), mRNA. /PROD=hypothetical protein MGC5363 /FL=gb:BC001000.2 gb:NM_024064.1
CYP1B1	202436_s_at	2.30535e-08	9.35399e-11	4.6449	2.21565	4.6449	up	11.6378	3.54075	11.6378	up	-0.79038	1.42527	2.75037	1545	Hs.154654	gb:AU144855 /DB_XREF=gi:11006376 /DB_XREF=AU144855 /CLONE=HEMBA1003161 /FEA=FLmRNA /CNT=212 /TID=Hs.154654.0 /TIER=Stack /STK=22 /UG=Hs.154654 /LL=1545 /UG_GENE=CYP1B1 /UG_TITLE=cytochrome P450, subfamily I (dioxin-inducible), polypeptide 1 (glaucoma 3, primary infantile) /FL=gb:U03688.1 gb:NM_000104.2
	240723_at	2.30535e-08	9.36053e-11	-2.62776	-1.39383	2.62776	down	-3.02766	-1.5982	3.02766	down	0.462169	-0.931663	-1.13604		Hs.661644	gb:AW183782 /DB_XREF=gi:6452296 /DB_XREF=xj87h02.x1 /CLONE=IMAGE:2664243 /FEA=EST /CNT=4 /TID=Hs.125867.0 /TIER=ConsEnd /STK=4 /UG=Hs.125867 /UG_TITLE=ESTs
2006-09-01	214298_x_at	2.33553e-08	9.5258e-11	-2.88489	-1.52851	2.88489	down	-2.46555	-1.30191	2.46555	down	0.44442	-1.08409	-0.857489	23157	Hs.496666	gb:AL568374 /DB_XREF=gi:12922649 /DB_XREF=AL568374 /CLONE=CS0DE001YI09 (3 prime) /FEA=EST /CNT=10 /TID=Hs.90998.3 /TIER=Stack /STK=8 /UG=Hs.90998 /LL=23157 /UG_GENE=KIAA0128 /UG_TITLE=KIAA0128 protein; septin 2
QPCT	205174_s_at	2.33807e-08	9.57892e-11	3.25979	1.70478	3.25979	up	2.55152	1.35136	2.55152	up	-0.511532	1.19325	0.839825	25797	Hs.79033	gb:NM_012413.2 /DB_XREF=gi:9257235 /GEN=QPCT /FEA=FLmRNA /CNT=54 /TID=Hs.79033.0 /TIER=FL /STK=0 /UG=Hs.79033 /LL=25797 /DEF=Homo sapiens glutaminyl-peptide cyclotransferase (glutaminyl cyclase) (QPCT), mRNA. /PROD=glutaminyl-peptide cyclotransferase precursor /FL=gb:NM_012413.2
ACSL1	207275_s_at	2.42225e-08	9.96812e-11	8.14465	3.02585	8.14465	up	4.31992	2.11101	4.31992	up	-1.15839	1.86746	0.952616	2180	Hs.406678	gb:NM_001995.1 /DB_XREF=gi:4503650 /GEN=FACL1 /FEA=FLmRNA /CNT=5 /TID=Hs.278333.0 /TIER=FL /STK=0 /UG=Hs.278333 /LL=2179 /DEF=Homo sapiens fatty-acid-Coenzyme A ligase, long-chain 1 (FACL1), nuclear gene encoding mitochondrial protein, mRNA. /PROD=long-chain fatty-acid-coenzyme A ligase 1 /FL=gb:NM_001995.1 gb:L09229.1
2006-09-01	212413_at	2.49078e-08	1.02957e-10	-2.33838	-1.22551	2.33838	down	-2.42456	-1.27772	2.42456	down	0.466009	-0.759501	-0.811714	23157	Hs.496666	gb:D50918.1 /DB_XREF=gi:1469178 /GEN=KIAA0128 /FEA=mRNA /CNT=148 /TID=Hs.90998.0 /TIER=Stack /STK=14 /UG=Hs.90998 /LL=23157 /UG_TITLE=KIAA0128 protein; septin 2 /DEF=Human mRNA for KIAA0128 gene, partial cds.
USP10	209136_s_at	2.53423e-08	1.05216e-10	-3.08988	-1.62755	3.08988	down	-1.66577	-0.736189	1.66577	down	0.598864	-1.02869	-0.137324	9100	Hs.136778	gb:BG390445 /DB_XREF=gi:13283893 /DB_XREF=602416083F1 /CLONE=IMAGE:4524309 /FEA=FLmRNA /CNT=195 /TID=Hs.78829.0 /TIER=Stack /STK=9 /UG=Hs.78829 /LL=9100 /UG_GENE=USP10 /UG_TITLE=ubiquitin specific protease 10 /FL=gb:BC000263.1
HCFC1R1	45714_at	2.57073e-08	1.07672e-10	-2.06181	-1.04391	2.06181	down	1.65691	0.728495	1.65691	up	0.0604224	-0.983488	0.788918	54985	Hs.423103	Cluster Incl. AA436930:zv72b02.r1 Homo sapiens cDNA, 5 end /clone=IMAGE-759147 /clone_end=5' /gb=AA436930 /gi=2141844 /ug=Hs.239759 /len=586
ZAK	225662_at	2.57073e-08	1.07335e-10	1.94908	0.962794	1.94908	up	3.03015	1.59939	3.03015	up	-0.506785	0.456009	1.0926	51776	Hs.444451	gb:H28667 /DB_XREF=gi:899020 /DB_XREF=yl68f10.s1 /CLONE=IMAGE:163435 /FEA=EST /CNT=96 /TID=Hs.16930.0 /TIER=Stack /STK=9 /UG=Hs.16930 /UG_TITLE=ESTs
LRRN3	209840_s_at	2.59738e-08	1.09263e-10	-19.1115	-4.25637	19.1115	down	-13.1249	-3.71423	13.1249	down	1.84678	-2.40959	-1.86745	54674	Hs.3781	gb:AI221950 /DB_XREF=gi:3804153 /DB_XREF=qh01b02.x1 /CLONE=IMAGE:1843371 /FEA=FLmRNA /CNT=66 /TID=Hs.3781.0 /TIER=Stack /STK=15 /UG=Hs.3781 /LL=54674 /UG_GENE=FLJ11129 /UG_TITLE=similar to murine leucine-rich repeat protein /FL=gb:AL442092.1
AGFG1	218092_s_at	2.88095e-08	1.21719e-10	3.06589	1.6163	3.06589	up	5.70994	2.51347	5.70994	up	-0.368847	1.24746	2.14463	3267	Hs.352962	gb:NM_004504.2 /DB_XREF=gi:7262381 /GEN=HRB /FEA=FLmRNA /CNT=153 /TID=Hs.171545.0 /TIER=FL+Stack /STK=35 /UG=Hs.171545 /LL=3267 /DEF=Homo sapiens HIV-1 Rev binding protein (HRB), mRNA. /PROD=HIV-1 Rev binding protein /FL=gb:NM_004504.2
KLHDC10	209254_at	2.88638e-08	1.22476e-10	-1.67072	-0.740469	1.67072	down	1.3955	0.480782	1.3955	up	-0.0117737	-0.752243	0.469008	23008	Hs.520710	gb:AI808625 /DB_XREF=gi:5395191 /DB_XREF=wf56f12.x1 /CLONE=IMAGE:2359631 /FEA=FLmRNA /CNT=171 /TID=Hs.192966.0 /TIER=Stack /STK=8 /UG=Hs.192966 /LL=23008 /UG_GENE=KIAA0265 /UG_TITLE=KIAA0265 protein /FL=gb:AF277177.1
FCAR	211305_x_at	2.96986e-08	1.26562e-10	3.04421	1.60607	3.04421	up	3.58616	1.84244	3.58616	up	-0.853587	0.75248	0.988852	2204	Hs.659872	gb:U56236.1 /DB_XREF=gi:1326228 /FEA=FLmRNA /CNT=1 /TID=Hs.193122.1 /TIER=FL /STK=0 /UG=Hs.193122 /LL=2204 /UG_GENE=FCAR /DEF=Human Fc alpha receptor b mRNA, complete cds. /PROD=FcalphaRb /FL=gb:U56236.1
FGD4	230559_x_at	3.02554e-08	1.29488e-10	2.82338	1.49742	2.82338	up	4.44835	2.15327	4.44835	up	-0.426584	1.07084	1.72669	121512	Hs.117835	gb:AI277617 /DB_XREF=gi:3899885 /DB_XREF=qm61a04.x1 /CLONE=IMAGE:1893198 /FEA=EST /CNT=9 /TID=Hs.124442.0 /TIER=Stack /STK=9 /UG=Hs.124442 /UG_TITLE=ESTs, Highly similar to ALU8_HUMAN ALU SUBFAMILY SX SEQUENCE CONTAMINATION WARNING ENTRY (H.sapiens)
POMP	217769_s_at	3.02755e-08	1.30128e-10	1.27378	0.34912	1.27378	up	2.43788	1.28563	2.43788	up	-0.285406	0.0637148	1.00022	51371	Hs.268742	gb:NM_015932.1 /DB_XREF=gi:7705428 /GEN=HSPC014 /FEA=FLmRNA /CNT=287 /TID=Hs.279813.0 /TIER=FL+Stack /STK=54 /UG=Hs.279813 /LL=51371 /DEF=Homo sapiens hypothetical protein (HSPC014), mRNA. /PROD=hypothetical protein /FL=gb:NM_015932.1 gb:AF077200.1 gb:BC003390.1 gb:AF275807.1 gb:AF125097.1
TOR4A	219620_x_at	3.04557e-08	1.31459e-10	1.33221	0.41382	1.33221	up	2.68423	1.42451	2.68423	up	-0.279464	0.134356	1.14504	54863	Hs.495541	gb:NM_017723.1 /DB_XREF=gi:8923220 /GEN=FLJ20245 /FEA=FLmRNA /CNT=24 /TID=Hs.169758.0 /TIER=FL /STK=0 /UG=Hs.169758 /LL=54863 /DEF=Homo sapiens hypothetical protein FLJ20245 (FLJ20245), mRNA. /PROD=hypothetical protein FLJ20245 /FL=gb:NM_017723.1
RPL22	214042_s_at	3.23021e-08	1.40445e-10	-2.21328	-1.14619	2.21328	down	-2.76312	-1.4663	2.76312	down	0.488816	-0.657369	-0.977483	6146	Hs.515329	gb:AW071997 /DB_XREF=gi:6026995 /DB_XREF=ws57f09.x1 /CLONE=IMAGE:2501321 /FEA=EST /CNT=15 /TID=Hs.326249.0 /TIER=Stack /STK=14 /UG=Hs.326249 /UG_TITLE=Homo sapiens mRNA; cDNA DKFZp586E0524 (from clone DKFZp586E0524)
SIRPG	220485_s_at	3.23021e-08	1.40611e-10	-3.05936	-1.61323	3.05936	down	-3.45977	-1.79067	3.45977	down	0.610047	-1.00318	-1.18063	55423	Hs.590883	gb:NM_018556.1 /DB_XREF=gi:8924243 /GEN=SIRP-b2 /FEA=FLmRNA /CNT=10 /TID=Hs.50716.0 /TIER=FL /STK=5 /UG=Hs.50716 /LL=55423 /DEF=Homo sapiens hypothetical protein SIRP-b2 (SIRP-b2), mRNA. /PROD=hypothetical protein SIRP-b2 /FL=gb:AB042624.1 gb:NM_018556.1
IL2RB	205291_at	3.33524e-08	1.45793e-10	-2.57905	-1.36684	2.57905	down	-5.23672	-2.38866	5.23672	down	0.543459	-0.82338	-1.8452	3560	Hs.474787	gb:NM_000878.1 /DB_XREF=gi:4504664 /GEN=IL2RB /FEA=FLmRNA /CNT=45 /TID=Hs.75596.0 /TIER=FL+Stack /STK=26 /UG=Hs.75596 /LL=3560 /DEF=Homo sapiens interleukin 2 receptor, beta (IL2RB), mRNA. /PROD=interleukin 2 receptor, beta /FL=gb:NM_000878.1 gb:M26062.1
PVRIG	219812_at	3.33836e-08	1.46735e-10	-3.47352	-1.7964	3.47352	down	-6.05213	-2.59744	6.05213	down	0.613517	-1.18288	-1.98393	79037	Hs.729356	gb:NM_024070.1 /DB_XREF=gi:13129051 /GEN=MGC2463 /FEA=FLmRNA /CNT=54 /TID=Hs.323634.0 /TIER=FL+Stack /STK=10 /UG=Hs.323634 /LL=79037 /DEF=Homo sapiens hypothetical protein MGC2463 (MGC2463), mRNA. /PROD=hypothetical protein MGC2463 /FL=gb:BC001129.1 gb:NM_024070.1
NPL	221210_s_at	3.33836e-08	1.47151e-10	2.56896	1.36118	2.56896	up	1.78198	0.833484	1.78198	up	-0.441934	0.919248	0.39155	80896	Hs.496969	gb:NM_030769.1 /DB_XREF=gi:13540532 /GEN=C1ORF13 /FEA=FLmRNA /CNT=1 /TID=HsAffx.900046.172 /TIER=FL /STK=0 /DEF=Homo sapiens hypothetical protein similar to swine acylneuraminate lyase (C1ORF13), mRNA. /PROD=hypothetical protein similar to swineacylneuraminate lyase /FL=gb:NM_030769.1
NFE2L2	1567013_at	3.40172e-08	1.50565e-10	-2.45397	-1.29512	2.45397	down	2.03687	1.02635	2.03687	up	-0.0614498	-1.35657	0.964905	4780	Hs.744006	gb:AF323119.1 /DB_XREF=gi:12698719 /TID=Hs2.406403.1 /CNT=1 /FEA=mRNA /TIER=ConsEnd /STK=0 /UG=Hs.406403 /UG_TITLE=Homo sapiens NF-E2-related factor 2 mRNA, partial cds /DEF=Homo sapiens NF-E2-related factor 2 mRNA, partial cds.
EEF2	204102_s_at	3.41705e-08	1.51869e-10	-2.08584	-1.06063	2.08584	down	-2.07462	-1.05284	2.07462	down	0.366693	-0.693938	-0.686151	1938	Hs.515070	gb:NM_001961.1 /DB_XREF=gi:4503482 /GEN=EEF2 /FEA=FLmRNA /CNT=65 /TID=Hs.75309.0 /TIER=FL /STK=1 /UG=Hs.75309 /LL=1938 /DEF=Homo sapiens eukaryotic translation elongation factor 2 (EEF2), mRNA. /PROD=eukaryotic translation elongation factor 2 /FL=gb:NM_001961.1
SYNCRIP	209024_s_at	3.43403e-08	1.53252e-10	-2.51022	-1.32781	2.51022	down	-1.72373	-0.785533	1.72373	down	0.48637	-0.841441	-0.299163	10492	Hs.571177	gb:AI472757 /DB_XREF=gi:4325802 /DB_XREF=ta13e05.x1 /CLONE=IMAGE:2043968 /FEA=FLmRNA /CNT=175 /TID=Hs.155489.1 /TIER=Stack /STK=16 /UG=Hs.155489 /LL=10492 /UG_GENE=NSAP1 /UG_TITLE=NS1-associated protein 1 /FL=gb:AF037448.1
STOM	201060_x_at	3.44094e-08	1.54819e-10	4.03858	2.01385	4.03858	up	9.70565	3.27883	9.70565	up	-0.6958	1.31805	2.58303	2040	Hs.253903	gb:AI537887 /DB_XREF=gi:4452022 /DB_XREF=tp32g06.x1 /CLONE=IMAGE:2189530 /FEA=FLmRNA /CNT=443 /TID=Hs.160483.0 /TIER=Stack /STK=16 /UG=Hs.160483 /LL=2040 /UG_GENE=EPB72 /UG_TITLE=erythrocyte membrane protein band 7.2 (stomatin) /FL=gb:M81635.1 gb:NM_004099.1
CASS4	1554786_at	3.44094e-08	1.54201e-10	1.07756	0.107767	1.07756	up	-3.88266	-1.95704	3.88266	down	0.115822	0.223589	-1.84122	57091	Hs.473144	gb:BC027951.1 /DB_XREF=gi:20379731 /TID=Hs2.283102.2 /CNT=4 /FEA=FLmRNA /TIER=FL /STK=1 /LL=57091 /UG_GENE=C20orf32 /UG=Hs.283102 /DEF=Homo sapiens, Similar to chromosome 20 open reading frame 32, clone MGC:34259 IMAGE:5205865, mRNA, complete cds. /PROD=Similar to chromosome 20 open reading frame 32 /FL=gb:BC027951.1
SIGIRR	52940_at	3.48491e-08	1.57434e-10	-2.27883	-1.18829	2.27883	down	-1.97432	-0.981356	1.97432	down	0.296566	-0.891729	-0.68479	59307	Hs.501624	Cluster Incl. AA085764:zk71e09.s1 Homo sapiens cDNA, 3 end /clone=IMAGE-488296 /clone_end=3' /gb=AA085764 /gi=1629226 /ug=Hs.11809 /len=525
S100A9	203535_at	3.50113e-08	1.59697e-10	1.65181	0.724047	1.65181	up	2.29769	1.20018	2.29769	up	-0.386053	0.337994	0.814128	6280	Hs.112405	gb:NM_002965.2 /DB_XREF=gi:9845520 /GEN=S100A9 /FEA=FLmRNA /CNT=127 /TID=Hs.112405.0 /TIER=FL+Stack /STK=60 /UG=Hs.112405 /LL=6280 /DEF=Homo sapiens S100 calcium-binding protein A9 (calgranulin B) (S100A9), mRNA. /PROD=S100 calcium-binding protein A9 /FL=gb:NM_002965.2 gb:M26311.1
TCF7	205255_x_at	3.50113e-08	1.60088e-10	-2.81196	-1.49157	2.81196	down	-3.97255	-1.99006	3.97255	down	0.642137	-0.849437	-1.34793	6932	Hs.573153	gb:NM_003202.1 /DB_XREF=gi:4507402 /GEN=TCF7 /FEA=FLmRNA /CNT=37 /TID=Hs.169294.0 /TIER=FL /STK=0 /UG=Hs.169294 /LL=6932 /DEF=Homo sapiens transcription factor 7 (T-cell specific, HMG-box) (TCF7), mRNA. /PROD=transcription factor 7 (T-cell specific,HMG-box) /FL=gb:NM_003202.1
IL10RB-AS1	230631_s_at	3.50113e-08	1.59498e-10	2.27932	1.1886	2.27932	up	6.31091	2.65785	6.31091	up	-0.737385	0.451218	1.92046	100288432	Hs.709795	gb:AI202642 /DB_XREF=gi:3755248 /DB_XREF=qs72d12.x1 /CLONE=IMAGE:1943639 /FEA=EST /CNT=15 /TID=Hs.237955.4 /TIER=Stack /STK=14 /UG=Hs.237955 /LL=55402 /UG_GENE=PRO2706 /UG_TITLE=hypothetical protein PRO2706
GCA	203765_at	3.51554e-08	1.6139e-10	2.65937	1.41109	2.65937	up	3.81802	1.93283	3.81802	up	-0.487045	0.924041	1.44578	25801	Hs.377894	gb:NM_012198.1 /DB_XREF=gi:6912387 /GEN=GCL /FEA=FLmRNA /CNT=86 /TID=Hs.79381.0 /TIER=FL+Stack /STK=19 /UG=Hs.79381 /LL=25801 /DEF=Homo sapiens grancalcin (GCL), mRNA. /PROD=grancalcin /FL=gb:NM_012198.1 gb:BC005214.1 gb:M81637.1
SAT1	210592_s_at	3.58164e-08	1.6508e-10	2.07866	1.05565	2.07866	up	2.30095	1.20223	2.30095	up	-0.329423	0.726228	0.872809	6303	Hs.28491	gb:M55580.1 /DB_XREF=gi:338335 /GEN=spermidinespermine N1-acetyltransferase /FEA=FLmRNA /CNT=8 /TID=Hs.28491.1 /TIER=FL /STK=0 /UG=Hs.28491 /LL=6303 /DEF=Human spermidinespermine N1-acetyltransferase mRNA, complete cds. /PROD=spermidinespermine N1-acetyltransferase /FL=gb:M55580.1
EXOSC4	58696_at	3.72686e-08	1.72455e-10	1.24858	0.320285	1.24858	up	4.08402	2.02999	4.08402	up	-0.126592	0.193693	1.9034	54512	Hs.632041	Cluster Incl. AL039469:DKFZp434P0110_s1 Homo sapiens cDNA, 3 end /clone=DKFZp434P0110 /clone_end=3' /gb=AL039469 /gi=5408517 /ug=Hs.97574 /len=888
STK17B	205214_at	3.73162e-08	1.73766e-10	3.42697	1.77694	3.42697	up	2.87728	1.52471	2.87728	up	-0.68032	1.09662	0.844387	9262	Hs.88297	gb:NM_004226.1 /DB_XREF=gi:4758193 /GEN=STK17B /FEA=FLmRNA /CNT=48 /TID=Hs.120996.0 /TIER=FL+Stack /STK=12 /UG=Hs.120996 /LL=9262 /DEF=Homo sapiens serinethreonine kinase 17b (apoptosis-inducing) (STK17B), mRNA. /PROD=serinethreonine kinase 17b(apoptosis-inducing) /FL=gb:AB011421.1 gb:NM_004226.1
CYB561A3	224735_at	3.73162e-08	1.74722e-10	-2.05891	-1.04188	2.05891	down	-1.79401	-0.843191	1.79401	down	0.369182	-0.672696	-0.474009	220002	Hs.22546	gb:AA683481 /DB_XREF=gi:2670079 /DB_XREF=zl55b03.s1 /CLONE=IMAGE:505805 /FEA=mRNA /CNT=187 /TID=Hs.22546.0 /TIER=Stack /STK=56 /UG=Hs.22546 /UG_TITLE=Homo sapiens cDNA: FLJ22217 fis, clone HRC01591
EP400	230629_s_at	3.73162e-08	1.74252e-10	-7.94624	-2.99027	7.94624	down	-2.54084	-1.3453	2.54084	down	0.714252	-2.27602	-0.631051	57634	Hs.723478	gb:AI809582 /DB_XREF=gi:5396148 /DB_XREF=wf31b02.x1 /CLONE=IMAGE:2357163 /FEA=EST /CNT=10 /TID=Hs.14291.0 /TIER=Stack /STK=9 /UG=Hs.14291 /UG_TITLE=ESTs, Highly similar to KIAA1498 protein (H.sapiens)
IGHM	212827_at	3.73165e-08	1.75406e-10	-4.06507	-2.02328	4.06507	down	-4.4691	-2.15999	4.4691	down	1.13256	-0.890723	-1.02743	3507	Hs.510635	gb:X17115.1 /DB_XREF=gi:33450 /FEA=mRNA /CNT=128 /TID=Hs.302063.2 /TIER=Stack /STK=41 /UG=Hs.302063 /LL=3507 /UG_GENE=IGHM /UG_TITLE=immunoglobulin heavy constant mu /DEF=Human mRNA for IgM heavy chain complete sequence.
PGK1	200737_at	3.78889e-08	1.80156e-10	2.30895	1.20723	2.30895	up	2.55883	1.35548	2.55883	up	-0.343608	0.863627	1.01187	5230	Hs.78771	gb:NM_000291.1 /DB_XREF=gi:4505762 /GEN=PGK1 /FEA=FLmRNA /CNT=450 /TID=Hs.78771.0 /TIER=FL+Stack /STK=249 /UG=Hs.78771 /LL=5230 /DEF=Homo sapiens phosphoglycerate kinase 1 (PGK1), mRNA. /PROD=phosphoglycerate kinase 1 /FL=gb:NM_000291.1
MEA1	218061_at	3.78889e-08	1.80176e-10	-2.3987	-1.26225	2.3987	down	1.04871	0.0686102	1.04871	up	0.169995	-1.09225	0.238606	4201	Hs.278362	gb:NM_014623.1 /DB_XREF=gi:7657325 /GEN=MEA /FEA=FLmRNA /CNT=147 /TID=Hs.278362.0 /TIER=FL+Stack /STK=62 /UG=Hs.278362 /LL=4201 /DEF=Homo sapiens male-enhanced antigen (MEA), mRNA. /PROD=male-enhanced antigen /FL=gb:BC001754.1 gb:NM_014623.1 gb:L10400.1 gb:M27937.1
NRDC	229422_at	3.78889e-08	1.79636e-10	2.55517	1.35342	2.55517	up	1.65054	0.722943	1.65054	up	-0.338985	1.01443	0.383958	4898	Hs.584782	gb:AA448346 /DB_XREF=gi:2162016 /DB_XREF=zw98g12.s1 /CLONE=IMAGE:785062 /FEA=EST /CNT=16 /TID=Hs.309734.0 /TIER=Stack /STK=10 /UG=Hs.309734 /UG_TITLE=ESTs, Moderately similar to NRD2 convertase (H.sapiens)
FCAR	207674_at	3.83449e-08	1.83046e-10	4.92593	2.3004	4.92593	up	5.6622	2.50136	5.6622	up	-0.824238	1.47616	1.67712	2204	Hs.659872	gb:NM_002000.1 /DB_XREF=gi:4503672 /GEN=FCAR /FEA=FLmRNA /CNT=6 /TID=Hs.193122.0 /TIER=FL /STK=0 /UG=Hs.193122 /LL=2204 /DEF=Homo sapiens Fc fragment of IgA, receptor for (FCAR), mRNA. /PROD=Fc fragment of IgA, receptor for /FL=gb:D87861.1 gb:D87855.1 gb:NM_002000.1
EP400	212375_at	3.83576e-08	1.83808e-10	-1.77044	-0.824106	1.77044	down	-2.18868	-1.13006	2.18868	down	0.456194	-0.367912	-0.673866	57634	Hs.723478	gb:AL563727 /DB_XREF=gi:12913403 /DB_XREF=AL563727 /CLONE=CS0DD007YL16 (3 prime) /FEA=mRNA /CNT=194 /TID=Hs.306094.0 /TIER=Stack /STK=70 /UG=Hs.306094 /LL=23472 /UG_GENE=TNRC12 /UG_TITLE=trinucleotide repeat containing 12
ZBTB5	203026_at	3.86251e-08	1.87209e-10	-1.69429	-0.760679	1.69429	down	-1.77619	-0.828786	1.77619	down	0.387027	-0.373652	-0.441758	9925	Hs.161276	gb:NM_014872.1 /DB_XREF=gi:7662073 /GEN=KIAA0354 /FEA=FLmRNA /CNT=126 /TID=Hs.3682.0 /TIER=FL+Stack /STK=58 /UG=Hs.3682 /LL=9925 /DEF=Homo sapiens KIAA0354 gene product (KIAA0354), mRNA. /PROD=KIAA0354 gene product /FL=gb:AB002352.1 gb:NM_014872.1
IRAK3	213817_at	3.86251e-08	1.87018e-10	6.61104	2.72488	6.61104	up	10.1988	3.35032	10.1988	up	-0.651889	2.07299	2.69844	11213	Hs.369265	gb:AL049435.1 /DB_XREF=gi:4500218 /FEA=mRNA /CNT=31 /TID=Hs.170056.0 /TIER=Stack /STK=10 /UG=Hs.170056 /UG_TITLE=Homo sapiens mRNA; cDNA DKFZp586B0220 (from clone DKFZp586B0220) /DEF=Homo sapiens mRNA; cDNA DKFZp586B0220 (from clone DKFZp586B0220).
BCL6	228758_at	3.86251e-08	1.86085e-10	2.8554	1.51369	2.8554	up	4.15064	2.05333	4.15064	up	-0.857212	0.656482	1.19612	604		gb:AW264036 /DB_XREF=gi:6640852 /DB_XREF=xq82g12.x1 /CLONE=IMAGE:2757190 /FEA=EST /CNT=17 /TID=Hs.63920.0 /TIER=Stack /STK=14 /UG=Hs.63920 /UG_TITLE=ESTs
LY96	206584_at	3.86539e-08	1.88493e-10	2.69849	1.43215	2.69849	up	6.98775	2.80483	6.98775	up	-0.921192	0.510958	1.88364	23643	Hs.726603	gb:NM_015364.1 /DB_XREF=gi:7662503 /GEN=MD-2 /FEA=FLmRNA /CNT=13 /TID=Hs.69328.0 /TIER=FL+Stack /STK=8 /UG=Hs.69328 /LL=23643 /DEF=Homo sapiens MD-2 protein (MD-2), mRNA. /PROD=MD-2 protein /FL=gb:AF168121.1 gb:NM_015364.1 gb:AB018549.1
2001-09-01	227552_at	3.86539e-08	1.88762e-10	-3.08979	-1.62751	3.08979	down	-3.17011	-1.66453	3.17011	down	0.33587	-1.29164	-1.32866	1731	Hs.632176	gb:AI003777 /DB_XREF=gi:3213287 /DB_XREF=ou91f10.x1 /CLONE=IMAGE:1635211 /FEA=EST /CNT=40 /TID=Hs.99741.0 /TIER=Stack /STK=30 /UG=Hs.99741 /UG_TITLE=ESTs, Weakly similar to PNL1_HUMAN PEANUT-LIKE PROTEIN 1 (H.sapiens)
PGD	201118_at	3.89655e-08	1.92021e-10	3.99821	1.99935	3.99821	up	4.31945	2.11085	4.31945	up	-0.735804	1.26355	1.37504	5226	Hs.464071	gb:NM_002631.1 /DB_XREF=gi:4505758 /GEN=PGD /FEA=FLmRNA /CNT=342 /TID=Hs.75888.0 /TIER=FL /STK=0 /UG=Hs.75888 /LL=5226 /DEF=Homo sapiens phosphogluconate dehydrogenase (PGD), mRNA. /PROD=phosphogluconate dehydrogenase /FL=gb:U30255.1 gb:NM_002631.1 gb:BC000368.1
SNRPA	201770_at	3.89655e-08	1.92981e-10	-1.768	-0.822116	1.768	down	-1.8383	-0.87837	1.8383	down	0.502492	-0.319624	-0.375878	6626	Hs.466775	gb:NM_004596.1 /DB_XREF=gi:4759155 /GEN=SNRPA /FEA=FLmRNA /CNT=240 /TID=Hs.173255.0 /TIER=FL+Stack /STK=87 /UG=Hs.173255 /LL=6626 /DEF=Homo sapiens small nuclear ribonucleoprotein polypeptide A (SNRPA), mRNA. /PROD=small nuclear ribonucleoprotein polypeptide A /FL=gb:BC000405.1 gb:NM_004596.1
STXBP2	209367_at	3.89655e-08	1.93135e-10	-1.22709	-0.295238	1.22709	down	2.83744	1.50459	2.83744	up	-0.14477	-0.440008	1.35982	6813	Hs.515104	gb:AB002559.1 /DB_XREF=gi:1944129 /FEA=FLmRNA /CNT=105 /TID=Hs.90535.0 /TIER=FL+Stack /STK=26 /UG=Hs.90535 /LL=6813 /UG_GENE=STXBP2 /DEF=Homo sapiens mRNA for hunc18b2, complete cds. /PROD=hunc18b2 /FL=gb:NM_006949.1 gb:BC002869.1 gb:AB002559.1 gb:U63533.1
MTF1	227150_at	3.89655e-08	1.92511e-10	2.00203	1.00146	2.00203	up	2.93968	1.55566	2.93968	up	-0.432567	0.568894	1.12309	4520	Hs.471991	gb:N46867 /DB_XREF=gi:1188033 /DB_XREF=yy73f08.s1 /CLONE=IMAGE:279207 /FEA=EST /CNT=34 /TID=Hs.323867.0 /TIER=Stack /STK=19 /UG=Hs.323867 /UG_TITLE=ESTs
CXXC5	224516_s_at	3.9693e-08	1.97467e-10	-2.82921	-1.5004	2.82921	down	-2.71682	-1.44192	2.71682	down	0.588733	-0.911667	-0.853185	51523	Hs.744933	gb:BC006428.1 /DB_XREF=gi:13623618 /FEA=FLmRNA /CNT=1 /TID=HsAffx.901074.311 /TIER=FL /STK=0 /DEF=Homo sapiens, hypothetical protein, clone MGC:12969, mRNA, complete cds. /PROD=hypothetical protein /FL=gb:BC006428.1
CCNA1	205899_at	3.99103e-08	2.00008e-10	4.73286	2.24271	4.73286	up	20.8625	4.38284	20.8625	up	-1.24022	1.00249	3.14262	8900	Hs.417050	gb:NM_003914.1 /DB_XREF=gi:4502610 /GEN=CCNA1 /FEA=FLmRNA /CNT=39 /TID=Hs.79378.0 /TIER=FL+Stack /STK=23 /UG=Hs.79378 /LL=8900 /DEF=Homo sapiens cyclin A1 (CCNA1), mRNA. /PROD=cyclin A1 /FL=gb:NM_003914.1 gb:U66838.1
	227501_at	3.99103e-08	1.99898e-10	2.37621	1.24866	2.37621	up	2.43048	1.28124	2.43048	up	-0.518019	0.730642	0.76322		Hs.657637	gb:AI377135 /DB_XREF=gi:4186988 /DB_XREF=tc38d05.x1 /CLONE=IMAGE:2066889 /FEA=EST /CNT=31 /TID=Hs.28752.0 /TIER=Stack /STK=18 /UG=Hs.28752 /UG_TITLE=ESTs
CD74	209619_at	3.99224e-08	2.00799e-10	-3.11227	-1.63797	3.11227	down	-3.39147	-1.76191	3.39147	down	0.572974	-1.06499	-1.18894	972	Hs.436568	gb:K01144.1 /DB_XREF=gi:188469 /FEA=FLmRNA /CNT=391 /TID=Hs.84298.0 /TIER=FL /STK=1 /UG=Hs.84298 /LL=972 /UG_GENE=CD74 /DEF=Human major histocompatibility class II antigen gamma chain mRNA, complete cds. /PROD=class II antigen gamma chain /FL=gb:K01144.1 gb:NM_004355.1
KLF5	209211_at	4.08843e-08	2.06384e-10	2.68334	1.42403	2.68334	up	3.61473	1.85389	3.61473	up	-0.964357	0.459674	0.88953	688	Hs.508234	gb:AF132818.1 /DB_XREF=gi:6580834 /GEN=CKLF /FEA=FLmRNA /CNT=158 /TID=Hs.84728.0 /TIER=FL+Stack /STK=23 /UG=Hs.84728 /LL=688 /DEF=Homo sapiens colon Kruppel-like factor (CKLF) mRNA, complete cds. /PROD=colon Kruppel-like factor /FL=gb:AF132818.1 gb:AF287272.1 gb:AB030824.1 gb:NM_001730.1 gb:D14520.1
DCAF10	222804_x_at	4.11981e-08	2.08722e-10	2.24259	1.16516	2.24259	up	1.87244	0.90492	1.87244	up	-0.445253	0.719911	0.459667	79269	Hs.118394	gb:N58163 /DB_XREF=gi:1202053 /DB_XREF=yv65h02.s1 /CLONE=IMAGE:247635 /FEA=FLmRNA /CNT=48 /TID=Hs.317589.0 /TIER=Stack /STK=17 /UG=Hs.317589 /LL=79269 /UG_GENE=MGC10765 /UG_TITLE=hypothetical protein MGC10765 /FL=gb:NM_024345.1 gb:BC003520.1
ANKRD36///ANKRD36B	214723_x_at	4.12416e-08	2.09697e-10	-4.00924	-2.00333	4.00924	down	-1.82101	-0.864738	1.82101	down	0.541039	-1.46229	-0.323699	57730///375248	Hs.532921///Hs.541894	gb:AB046861.1 /DB_XREF=gi:10047358 /GEN=KIAA1641 /FEA=mRNA /CNT=27 /TID=Hs.44566.1 /TIER=ConsEnd /STK=1 /UG=Hs.44566 /LL=57730 /DEF=Homo sapiens mRNA for KIAA1641 protein, partial cds. /PROD=KIAA1641 protein
FBXO9	1566509_s_at	4.24401e-08	2.16567e-10	1.50269	0.587545	1.50269	up	2.48869	1.31539	2.48869	up	-0.338904	0.248641	0.976483	26268	Hs.216653	gb:AK095315.1 /DB_XREF=gi:21754550 /TID=Hs2.377970.2 /CNT=1 /FEA=mRNA /TIER=ConsEnd /STK=0 /UG=Hs.377970 /UG_TITLE=Homo sapiens cDNA FLJ37996 fis, clone CTONG2011920, weakly similar to Homo sapiens NY-REN-57 antigen mRNA. /DEF=Homo sapiens cDNA FLJ37996 fis, clone CTONG2011920, weakly similar to Homo sapiens NY-REN-57 antigen mRNA.
IFNAR1	225669_at	4.25805e-08	2.18062e-10	1.91208	0.935139	1.91208	up	2.68782	1.42644	2.68782	up	-0.632849	0.30229	0.793589	3454	Hs.529400	gb:AA133989 /DB_XREF=gi:1691183 /DB_XREF=zl37d09.s1 /CLONE=IMAGE:504113 /FEA=EST /CNT=92 /TID=Hs.181315.0 /TIER=Stack /STK=18 /UG=Hs.181315 /UG_TITLE=ESTs, Moderately similar to ALU4_HUMAN ALU SUBFAMILY SB2 SEQUENCE CONTAMINATION WARNING ENTRY (H.sapiens)
MAFG	204970_s_at	4.26756e-08	2.2011e-10	1.75272	0.809596	1.75272	up	2.45739	1.29713	2.45739	up	-0.517794	0.291803	0.779336	4097	Hs.744113	gb:NM_002359.1 /DB_XREF=gi:4505072 /GEN=MAFG /FEA=FLmRNA /CNT=51 /TID=Hs.252229.0 /TIER=FL /STK=0 /UG=Hs.252229 /LL=4097 /DEF=Homo sapiens v-maf musculoaponeurotic fibrosarcoma (avian) oncogene family, protein G (MAFG), mRNA. /PROD=v-maf musculoaponeurotic fibrosarcoma (avian)oncogene family, protein G /FL=gb:NM_002359.1 gb:AF059195.1
UBE2J1	222435_s_at	4.26756e-08	2.19639e-10	2.55286	1.35211	2.55286	up	3.06015	1.6136	3.06015	up	-0.488173	0.863941	1.12543	51465	Hs.163776	gb:AF161502.1 /DB_XREF=gi:6841527 /FEA=FLmRNA /CNT=273 /TID=Hs.184325.0 /TIER=FL /STK=4 /UG=Hs.184325 /LL=51632 /UG_GENE=LOC51632 /DEF=Homo sapiens HSPC153 mRNA, complete cds. /PROD=HSPC153 /FL=gb:AF151834.1 gb:AF161502.1 gb:AF151039.1 gb:NM_016021.1
STAT5B	212549_at	4.29175e-08	2.22143e-10	1.57558	0.655884	1.57558	up	1.63987	0.713585	1.63987	up	-0.291469	0.364414	0.422116	6777	Hs.595276	gb:BE645861 /DB_XREF=gi:9970172 /DB_XREF=7e77d05.x1 /CLONE=IMAGE:3288489 /FEA=mRNA /CNT=126 /TID=Hs.24064.0 /TIER=Stack /STK=36 /UG=Hs.24064 /UG_TITLE=Homo sapiens mRNA; cDNA DKFZp586N1323 (from clone DKFZp586N1323)
GK	207387_s_at	4.30561e-08	2.27364e-10	3.67828	1.87903	3.67828	up	2.6357	1.39819	2.6357	up	-0.553231	1.3258	0.844954	2710	Hs.1466	gb:NM_000167.1 /DB_XREF=gi:4504006 /GEN=GK /FEA=FLmRNA /CNT=6 /TID=Hs.1466.0 /TIER=FL /STK=0 /UG=Hs.1466 /LL=2710 /DEF=Homo sapiens glycerol kinase (GK), mRNA. /PROD=glycerol kinase /FL=gb:NM_000167.1 gb:L13943.1
ILF3	208930_s_at	4.30561e-08	2.2623e-10	-10.9159	-3.44836	10.9159	down	-3.30277	-1.72368	3.30277	down	0.81463	-2.63373	-0.909046	3609	Hs.465885	gb:BG032366 /DB_XREF=gi:12423596 /DB_XREF=602301349F1 /CLONE=IMAGE:4402836 /FEA=FLmRNA /CNT=234 /TID=Hs.256583.1 /TIER=Stack /STK=27 /UG=Hs.256583 /LL=3609 /UG_GENE=ILF3 /UG_TITLE=interleukin enhancer binding factor 3, 90kD /FL=gb:AF167569.1 gb:AF147209.1
RORA	210479_s_at	4.30561e-08	2.26626e-10	-4.33075	-2.11462	4.33075	down	-2.51052	-1.32799	2.51052	down	0.362926	-1.75169	-0.965063	6095	Hs.560343	gb:L14611.1 /DB_XREF=gi:348240 /FEA=FLmRNA /CNT=8 /TID=Hs.2156.0 /TIER=FL /STK=0 /UG=Hs.2156 /LL=6095 /UG_GENE=RORA /DEF=Human transcription factor RZR-alpha mRNA, complete cds. /PROD=transcription factor /FL=gb:L14611.1 gb:U04899.1 gb:NM_002943.1
PEBP1	211941_s_at	4.30561e-08	2.27064e-10	-1.87715	-0.908542	1.87715	down	-2.27886	-1.18831	2.27886	down	0.266829	-0.641713	-0.921482	5037	Hs.433863	gb:BE969671 /DB_XREF=gi:10582604 /DB_XREF=601679610F1 /CLONE=IMAGE:3949779 /FEA=EST /CNT=488 /TID=Hs.80423.1 /TIER=Stack /STK=11 /UG=Hs.80423 /LL=5037 /UG_GENE=PBP /UG_TITLE=prostatic binding protein
FBXO9	212991_at	4.30561e-08	2.27585e-10	1.44381	0.529879	1.44381	up	1.71969	0.78215	1.71969	up	-0.328049	0.201831	0.454102	26268	Hs.216653	gb:AL137520.1 /DB_XREF=gi:6808183 /GEN=DKFZp434C0118 /FEA=mRNA /CNT=62 /TID=Hs.11050.3 /TIER=ConsEnd /STK=0 /UG=Hs.11050 /LL=26268 /DEF=Homo sapiens mRNA; cDNA DKFZp434C0118 (from clone DKFZp434C0118); partial cds. /PROD=hypothetical protein
UBE2F	225783_at	4.30561e-08	2.2629e-10	2.04368	1.03117	2.04368	up	3.00672	1.58819	3.00672	up	-0.390804	0.640366	1.19739	140739	Hs.471785	gb:BF675985 /DB_XREF=gi:11949880 /DB_XREF=602083944F1 /CLONE=IMAGE:4248227 /FEA=EST /CNT=94 /TID=Hs.289051.0 /TIER=Stack /STK=13 /UG=Hs.289051 /UG_TITLE=Homo sapiens cDNA FLJ13857 fis, clone THYRO1001003, weakly similar to UBIQUITIN-CONJUGATING ENZYME E2-21.2 KD (EC 6.3.2.19)
ROPN1L	223609_at	4.41622e-08	2.3424e-10	3.66905	1.87541	3.66905	up	3.22859	1.69091	3.22859	up	-0.786147	1.08926	0.904759	83853	Hs.381089	gb:AF239723.1 /DB_XREF=gi:12539614 /GEN=ASP /FEA=FLmRNA /CNT=38 /TID=Hs.41644.0 /TIER=FL+Stack /STK=28 /UG=Hs.41644 /DEF=Homo sapiens AKAP-associated sperm protein (ASP) mRNA, complete cds. /PROD=AKAP-associated sperm protein /FL=gb:AF239723.1
LOC100129518///SOD2	221477_s_at	4.56674e-08	2.43058e-10	4.75743	2.25018	4.75743	up	1.36646	0.450441	1.36646	up	-0.395751	1.85443	0.0546899	6648///100129518	Hs.487046	gb:BF575213 /DB_XREF=gi:11648925 /DB_XREF=602133624F1 /CLONE=IMAGE:4288756 /FEA=FLmRNA /CNT=392 /TID=Hs.177781.0 /TIER=Stack /STK=8 /UG=Hs.177781 /UG_TITLE=Homo sapiens, clone MGC:5618, mRNA, complete cds /FL=gb:BC001980.1
CCPG1///DYX1C1-CCPG1	214152_at	4.57596e-08	2.4606e-10	1.63009	0.704952	1.63009	up	4.37273	2.12854	4.37273	up	-0.397068	0.307884	1.73147	9236///100533483	Hs.285051	gb:AU144243 /DB_XREF=gi:11005764 /DB_XREF=AU144243 /CLONE=HEMBA1001328 /FEA=EST /CNT=13 /TID=Hs.247118.1 /TIER=Stack /STK=8 /UG=Hs.247118 /LL=9488 /UG_GENE=PIGB /UG_TITLE=phosphatidylinositol glycan, class B
C19orf43	223003_at	4.57596e-08	2.45859e-10	-2.17627	-1.12186	2.17627	down	-1.05867	-0.0822484	1.05867	down	0.0950108	-1.02685	0.0127624	79002	Hs.515155	gb:AF061732.1 /DB_XREF=gi:12001999 /FEA=FLmRNA /CNT=221 /TID=Hs.239894.0 /TIER=FL+Stack /STK=86 /UG=Hs.239894 /LL=79002 /UG_GENE=MGC2803 /DEF=Homo sapiens clone 017d02 My029 protein mRNA, complete cds. /PROD=My029 protein /FL=gb:NM_024038.1 gb:BC004533.1 gb:BC000216.1 gb:AF061732.1
	239122_at	4.57596e-08	2.44694e-10	-2.33005	-1.22036	2.33005	down	-3.11613	-1.63976	3.11613	down	0.542006	-0.678357	-1.09775		Hs.605350	gb:AI638155 /DB_XREF=gi:4690389 /DB_XREF=ts97a11.x1 /CLONE=IMAGE:2239196 /FEA=EST /CNT=6 /TID=Hs.176430.0 /TIER=ConsEnd /STK=4 /UG=Hs.176430 /UG_TITLE=ESTs
RNF11	208924_at	4.59475e-08	2.47911e-10	3.04826	1.60799	3.04826	up	4.87487	2.28537	4.87487	up	-0.741515	0.866471	1.54385	26994	Hs.309641	gb:AB024703.1 /DB_XREF=gi:5931544 /GEN=Sid1669 /FEA=FLmRNA /CNT=241 /TID=Hs.96334.0 /TIER=FL+Stack /STK=65 /UG=Hs.96334 /LL=26994 /DEF=Homo sapiens mRNA for Sid1669p, complete cds. /PROD=Sid1669p /FL=gb:NM_014372.1 gb:AB024703.1 gb:AF151881.1
HLA-DPB1	201137_s_at	4.59869e-08	2.5209e-10	-2.80969	-1.49041	2.80969	down	-4.09314	-2.03321	4.09314	down	0.604227	-0.886182	-1.42898	3115	Hs.485130	gb:NM_002121.1 /DB_XREF=gi:4504404 /GEN=HLA-DPB1 /FEA=FLmRNA /CNT=360 /TID=Hs.814.0 /TIER=FL+Stack /STK=123 /UG=Hs.814 /LL=3115 /DEF=Homo sapiens major histocompatibility complex, class II, DP beta 1 (HLA-DPB1), mRNA. /PROD=major histocompatibility complex, class II, DPbeta 1 /FL=gb:NM_002121.1 gb:J03041.1 gb:M57466.1 gb:M83664.1 gb:M28202.1 gb:M28200.1
YIPF6	212341_at	4.59869e-08	2.50278e-10	2.05923	1.0421	2.05923	up	1.67568	0.744745	1.67568	up	-0.323668	0.718433	0.421077	286451	Hs.82719	gb:AA195936 /DB_XREF=gi:1791527 /DB_XREF=zp99d04.s1 /CLONE=IMAGE:628327 /FEA=mRNA /CNT=195 /TID=Hs.82719.0 /TIER=Stack /STK=19 /UG=Hs.82719 /UG_TITLE=Homo sapiens mRNA; cDNA DKFZp586F1822 (from clone DKFZp586F1822)
AES	217729_s_at	4.59869e-08	2.52329e-10	-2.94538	-1.55845	2.94538	down	-2.57741	-1.36592	2.57741	down	0.648356	-0.910096	-0.717564	166	Hs.515053	gb:NM_001130.3 /DB_XREF=gi:6382065 /GEN=AES /FEA=FLmRNA /CNT=385 /TID=Hs.244.0 /TIER=FL+Stack /STK=45 /UG=Hs.244 /LL=166 /DEF=Homo sapiens amino-terminal enhancer of split (AES), mRNA. /PROD=amino-terminal enhancer of split /FL=gb:AF072902.1 gb:NM_001130.3 gb:U04241.1
MLLT6	224784_at	4.59869e-08	2.51041e-10	-1.94494	-0.959725	1.94494	down	-2.64331	-1.40234	2.64331	down	0.514769	-0.444956	-0.887575	4302	Hs.91531	gb:BG024886 /DB_XREF=gi:12410921 /DB_XREF=602275807F1 /CLONE=IMAGE:4363945 /FEA=EST /CNT=140 /TID=Hs.5241.1 /TIER=Stack /STK=90 /UG=Hs.5241 /LL=2168 /UG_GENE=FABP1 /UG_TITLE=fatty acid binding protein 1, liver
NLRC4	1552553_a_at	4.59869e-08	2.49705e-10	2.7977	1.48424	2.7977	up	6.72262	2.74902	6.72262	up	-0.329138	1.1551	2.41989	58484	Hs.574741	gb:NM_021209.2 /DB_XREF=gi:20127597 /GEN=CARD12 /TID=Hs2.23248.1 /CNT=8 /FEA=FLmRNA /TIER=FL /STK=3 /LL=58484 /UG=Hs.23248 /DEF=Homo sapiens caspase recruitment domain family, member 12 (CARD12), mRNA. /PROD=caspase recruitment domain protein 12 /FL=gb:AY027790.1 gb:NM_021209.2 gb:AY027789.1 gb:AY035391.1 gb:AY027787.1
C3AR1	209906_at	4.62774e-08	2.54769e-10	3.15394	1.65715	3.15394	up	4.66802	2.22281	4.66802	up	-0.698653	0.958501	1.52416	719	Hs.591148	gb:U62027.1 /DB_XREF=gi:1511643 /GEN=HNFAG09 /FEA=FLmRNA /CNT=43 /TID=Hs.155935.0 /TIER=FL+Stack /STK=19 /UG=Hs.155935 /LL=719 /DEF=Human anaphylatoxin C3a receptor (HNFAG09) mRNA, complete cds. /PROD=anaphylatoxin C3a receptor /FL=gb:U62027.1 gb:U28488.1 gb:NM_004054.1
IL17RA	229295_at	4.70999e-08	2.60158e-10	1.64936	0.721906	1.64936	up	3.23829	1.69523	3.23829	up	-0.343817	0.378089	1.35141	23765	Hs.48353	gb:BF939473 /DB_XREF=gi:12356793 /DB_XREF=nac76d11.x1 /CLONE=IMAGE:3440301 /FEA=EST /CNT=12 /TID=Hs.48353.0 /TIER=Stack /STK=8 /UG=Hs.48353 /UG_TITLE=ESTs
PPP3R1	204507_s_at	4.74478e-08	2.62948e-10	2.56419	1.3585	2.56419	up	2.82294	1.4972	2.82294	up	-0.603097	0.755405	0.894101	5534	Hs.280604	gb:NM_000945.1 /DB_XREF=gi:4506024 /GEN=PPP3R1 /FEA=FLmRNA /CNT=54 /TID=Hs.278540.0 /TIER=FL /STK=6 /UG=Hs.278540 /LL=5534 /DEF=Homo sapiens protein phosphatase 3 (formerly 2B), regulatory subunit B (19kD), alpha isoform (calcineurin B, type I) (PPP3R1), mRNA. /PROD=protein phosphatase 3 (formerly 2B), regulatorysubunit B (19kD), alpha isoform (calcineurin B, type I) /FL=gb:M30773.1 gb:NM_000945.1
ENTPD1	209474_s_at	4.85897e-08	2.70165e-10	3.76877	1.91409	3.76877	up	2.20485	1.14068	2.20485	up	-0.376343	1.53775	0.764338	953	Hs.576612	gb:U87967.1 /DB_XREF=gi:1842119 /FEA=FLmRNA /CNT=99 /TID=Hs.205353.1 /TIER=FL /STK=0 /UG=Hs.205353 /LL=953 /UG_GENE=ENTPD1 /DEF=Human ATP diphosphohydrolase mRNA, complete cds. /PROD=ATP diphosphohydrolase /FL=gb:U87967.1
LOC93622	225391_at	4.95811e-08	2.76584e-10	-2.2688	-1.18193	2.2688	down	-2.59681	-1.37674	2.59681	down	0.525856	-0.656072	-0.850887	93622	Hs.6815	gb:AL562398 /DB_XREF=gi:12910778 /DB_XREF=AL562398 /CLONE=CS0DC008YD20 (3 prime) /FEA=mRNA /CNT=92 /TID=Hs.6815.0 /TIER=Stack /STK=36 /UG=Hs.6815 /UG_TITLE=Homo sapiens cDNA: FLJ22722 fis, clone HSI14444
CD163	216233_at	4.95812e-08	2.78398e-10	12.7212	3.66916	12.7212	up	10.8416	3.43851	10.8416	up	-1.50209	2.16707	1.93642	9332		gb:Z22970.1 /DB_XREF=gi:312145 /FEA=mRNA /CNT=2 /TID=Hs.74076.1 /TIER=ConsEnd /STK=0 /UG=Hs.74076 /LL=9332 /UG_GENE=CD163 /DEF=H.sapiens mRNA for M130 antigen cytoplasmic variant 2. /PROD=M130 antigen cytoplasmic variant 2
	238405_at	4.95812e-08	2.78096e-10	4.61758	2.20714	4.61758	up	25.4686	4.67065	25.4686	up	-1.23128	0.975856	3.43937		Hs.667725	gb:AI792896 /DB_XREF=gi:5340612 /DB_XREF=qv50h03.y5 /CLONE=IMAGE:1985045 /FEA=EST /CNT=21 /TID=Hs.145339.0 /TIER=ConsEnd /STK=0 /UG=Hs.145339 /UG_TITLE=ESTs
TNFRSF10A	231775_at	4.97405e-08	2.80202e-10	-2.53629	-1.34272	2.53629	down	-1.4942	-0.579369	1.4942	down	0.367243	-0.975475	-0.212126	8797		gb:W65310 /DB_XREF=gi:1373636 /DB_XREF=zd33e01.r1 /CLONE=IMAGE:342456 /FEA=FLmRNA /CNT=15 /TID=Hs.249190.0 /TIER=ConsEnd /STK=0 /UG=Hs.249190 /LL=8797 /UG_GENE=TNFRSF10A /UG_TITLE=tumor necrosis factor receptor superfamily, member 10a /FL=gb:NM_003844.1 gb:U90875.1
EIF4G3	201936_s_at	5.16472e-08	2.92684e-10	1.59407	0.672711	1.59407	up	3.80217	1.92682	3.80217	up	-0.437035	0.235676	1.48979	8672	Hs.467084	gb:NM_003760.2 /DB_XREF=gi:10092600 /GEN=EIF4G3 /FEA=FLmRNA /CNT=158 /TID=Hs.25732.0 /TIER=FL+Stack /STK=26 /UG=Hs.25732 /LL=8672 /DEF=Homo sapiens eukaryotic translation initiation factor 4 gamma, 3 (EIF4G3), mRNA. /PROD=eukaryotic translation initiation factor 4gamma, 3 /FL=gb:NM_003760.2 gb:AF012072.2
INADL	214705_at	5.16472e-08	2.92832e-10	-1.8368	-0.877194	1.8368	down	-3.32492	-1.73332	3.32492	down	0.452302	-0.424892	-1.28102	10207	Hs.478125	gb:AJ001306.1 /DB_XREF=gi:2370148 /FEA=mRNA /CNT=33 /TID=Hs.321197.2 /TIER=ConsEnd /STK=0 /UG=Hs.321197 /LL=10207 /UG_GENE=INADL /DEF=Homo sapiens mRNA for PDZ domain protein. /PROD=PDZ domain protein
SRGN	201858_s_at	5.34913e-08	3.04267e-10	2.59255	1.37437	2.59255	up	2.10761	1.07561	2.10761	up	-0.566029	0.808343	0.509577	5552	Hs.1908	gb:J03223.1 /DB_XREF=gi:190419 /GEN=PRG1 /FEA=FLmRNA /CNT=337 /TID=Hs.1908.0 /TIER=FL /STK=0 /UG=Hs.1908 /LL=5552 /UG_TITLE=proteoglycan 1, secretory granule /DEF=Human secretory granule proteoglycan peptide core mRNA, complete cds. /FL=gb:J03223.1 gb:NM_002727.1
DDAH2	202262_x_at	5.3526e-08	3.05443e-10	1.58354	0.663149	1.58354	up	6.12379	2.61442	6.12379	up	-0.514985	0.148164	2.09944	23564	Hs.247362	gb:NM_013974.1 /DB_XREF=gi:7524353 /GEN=DDAH2 /FEA=FLmRNA /CNT=182 /TID=Hs.247362.0 /TIER=FL+Stack /STK=94 /UG=Hs.247362 /LL=23564 /DEF=Homo sapiens dimethylarginine dimethylaminohydrolase 2 (DDAH2), mRNA. /PROD=dimethylarginine dimethylaminohydrolase 2 /FL=gb:BC001435.1 gb:NM_013974.1 gb:AF070667.1
GAPDH	AFFX-HUMGAPDH/M33197_M_at	5.41713e-08	3.10116e-10	1.98477	0.988969	1.98477	up	2.40455	1.26577	2.40455	up	-0.522643	0.466326	0.743122	2597	Hs.544577	H. sapiens /GEN=GAPD /DB_XREF=gb:M33197.1 /NOTE=SIF corresponding to nucleotides 493-832 of gb:M33197.1 /DEF=Human glyceraldehyde-3-phosphate dehydrogenase (GAPDH) mRNA, complete cds.
TRIP12	201546_at	5.45615e-08	3.13348e-10	2.00937	1.00674	2.00937	up	2.08688	1.06135	2.08688	up	-0.336096	0.670648	0.725251	9320	Hs.591633	gb:NM_004238.1 /DB_XREF=gi:10863902 /GEN=TRIP12 /FEA=FLmRNA /CNT=232 /TID=Hs.138617.0 /TIER=FL+Stack /STK=97 /UG=Hs.138617 /LL=9320 /DEF=Homo sapiens thyroid hormone receptor interactor 12 (TRIP12), mRNA. /PROD=thyroid hormone receptor interactor 12 /FL=gb:D28476.1 gb:NM_004238.1
MORC2	203956_at	5.54358e-08	3.19383e-10	-2.22203	-1.15188	2.22203	down	-2.78766	-1.47905	2.78766	down	0.666781	-0.4851	-0.812272	22880	Hs.555918	gb:NM_014941.1 /DB_XREF=gi:7662339 /GEN=KIAA0852 /FEA=FLmRNA /CNT=72 /TID=Hs.35276.0 /TIER=FL+Stack /STK=40 /UG=Hs.35276 /LL=22880 /DEF=Homo sapiens KIAA0852 protein (KIAA0852), mRNA. /PROD=KIAA0852 protein /FL=gb:NM_014941.1 gb:AB020659.1
MTF1	205323_s_at	5.55464e-08	3.21037e-10	1.45458	0.540602	1.45458	up	2.08769	1.06191	2.08769	up	-0.388471	0.152131	0.673435	4520	Hs.471991	gb:NM_005955.1 /DB_XREF=gi:5174588 /GEN=MTF1 /FEA=FLmRNA /CNT=43 /TID=Hs.211581.0 /TIER=FL /STK=0 /UG=Hs.211581 /LL=4520 /DEF=Homo sapiens metal-regulatory transcription factor 1 (MTF1), mRNA. /PROD=metal-regulatory transcription factor 1 /FL=gb:NM_005955.1
PTMA	200773_x_at	5.57563e-08	3.23269e-10	-1.98536	-0.989404	1.98536	down	-1.56856	-0.64944	1.56856	down	0.286789	-0.702615	-0.362651	5757	Hs.459927	gb:NM_002823.1 /DB_XREF=gi:4506276 /GEN=PTMA /FEA=FLmRNA /CNT=439 /TID=Hs.250655.0 /TIER=FL+Stack /STK=10 /UG=Hs.250655 /LL=5757 /DEF=Homo sapiens prothymosin, alpha (gene sequence 28) (PTMA), mRNA. /PROD=prothymosin, alpha (gene sequence 28) /FL=gb:M14630.1 gb:BC003510.1 gb:M26708.1 gb:NM_002823.1
ZNF438	229743_at	5.58221e-08	3.25693e-10	2.66882	1.4162	2.66882	up	3.95769	1.98466	3.95769	up	-0.490095	0.926107	1.49456	220929	Hs.660642	gb:AI886666 /DB_XREF=gi:5591830 /DB_XREF=wn18a09.x1 /CLONE=IMAGE:2445784 /FEA=EST /CNT=17 /TID=Hs.104403.0 /TIER=Stack /STK=13 /UG=Hs.104403 /UG_TITLE=ESTs
USB1	1554016_a_at	5.58221e-08	3.25212e-10	1.8701	0.903114	1.8701	up	2.85361	1.51279	2.85361	up	-0.516978	0.386135	0.99581	79650	Hs.408702	gb:BC006291.1 /DB_XREF=gi:13623388 /TID=Hs2.25303.2 /CNT=10 /FEA=FLmRNA /TIER=FL /STK=7 /LL=79650 /UG_GENE=FLJ13154 /UG=Hs.25303 /UG_TITLE=hypothetical protein FLJ13154 /DEF=Homo sapiens, hypothetical protein FLJ13154, clone MGC:10683 IMAGE:4025993, mRNA, complete cds. /FL=gb:BC006291.1
FCER1G	204232_at	5.80142e-08	3.40866e-10	1.50141	0.586318	1.50141	up	3.60419	1.84968	3.60419	up	-0.302076	0.284242	1.5476	2207	Hs.433300	gb:NM_004106.1 /DB_XREF=gi:4758343 /GEN=FCER1G /FEA=FLmRNA /CNT=84 /TID=Hs.743.0 /TIER=FL+Stack /STK=36 /UG=Hs.743 /LL=2207 /DEF=Homo sapiens Fc fragment of IgE, high affinity I, receptor for; gamma polypeptide (FCER1G), mRNA. /PROD=Fc fragment of IgE, high affinity I, receptorfor, gamma polypeptide precursor /FL=gb:NM_004106.1 gb:M33195.1
RPL22	221726_at	5.80142e-08	3.39633e-10	-1.77486	-0.827709	1.77486	down	-2.85124	-1.51159	2.85124	down	0.380356	-0.447352	-1.13123	6146	Hs.515329	gb:BE250348 /DB_XREF=gi:9120458 /DB_XREF=600943342T1 /CLONE=IMAGE:2959811 /FEA=mRNA /CNT=353 /TID=Hs.326249.1 /TIER=Stack /STK=17 /UG=Hs.326249 /UG_TITLE=Homo sapiens mRNA; cDNA DKFZp586E0524 (from clone DKFZp586E0524)
C17orf49///RNASEK-C17orf49	224574_at	5.80142e-08	3.41666e-10	-2.25376	-1.17233	2.25376	down	-1.56949	-0.650297	1.56949	down	0.417357	-0.754974	-0.23294	124944///100529209	Hs.511801	gb:AV759602 /DB_XREF=gi:10917450 /DB_XREF=AV759602 /CLONE=MDSBZF03 /FEA=EST /CNT=345 /TID=Hs.9408.3 /TIER=Stack /STK=81 /UG=Hs.9408 /LL=29990 /UG_GENE=PILR(BETA) /UG_TITLE=paired immunoglobulin-like receptor beta
F8	205756_s_at	5.82841e-08	3.45316e-10	1.55194	0.634073	1.55194	up	2.2962	1.19925	2.2962	up	-0.395096	0.238977	0.804153	2157	Hs.654450	gb:NM_000132.2 /DB_XREF=gi:10518504 /GEN=F8 /FEA=FLmRNA /CNT=44 /TID=Hs.79345.1 /TIER=FL+Stack /STK=23 /UG=Hs.79345 /LL=2157 /DEF=Homo sapiens coagulation factor VIII, procoagulant component (hemophilia A) (F8), transcript variant 1, mRNA. /PROD=coagulation factor VIII, procoagulant component,isoform a precursor /FL=gb:NM_000132.2 gb:M14113.1
HLA-DOA	226878_at	5.82841e-08	3.45387e-10	-1.84893	-0.886691	1.84893	down	-2.8207	-1.49606	2.8207	down	0.312474	-0.574217	-1.18358	3111	Hs.631991	gb:AL581873 /DB_XREF=gi:12949303 /DB_XREF=AL581873 /CLONE=CS0DG006YK17 (3 prime) /FEA=EST /CNT=60 /TID=Hs.11135.2 /TIER=Stack /STK=46 /UG=Hs.11135 /LL=3111 /UG_GENE=HLA-DNA /UG_TITLE=major histocompatibility complex, class II, DN alpha
WDR26	224897_at	5.84322e-08	3.47334e-10	2.27443	1.18551	2.27443	up	2.03171	1.0227	2.03171	up	-0.384049	0.801459	0.638647	80232	Hs.497873	gb:BF510490 /DB_XREF=gi:11593788 /DB_XREF=UI-H-BI4-apa-b-04-0-UI.s1 /CLONE=IMAGE:3086550 /FEA=mRNA /CNT=135 /TID=Hs.5534.0 /TIER=Stack /STK=10 /UG=Hs.5534 /UG_TITLE=Homo sapiens cDNA FLJ12961 fis, clone NT2RP2005645
PTPRA	213795_s_at	5.85866e-08	3.49323e-10	-1.99974	-0.999812	1.99974	down	1.09149	0.126296	1.09149	up	0.104709	-0.895103	0.231005	5786	Hs.269577	gb:AL121905 /DB_XREF=gi:9663349 /FEA=mRNA /CNT=30 /TID=Hs.26045.1 /TIER=ConsEnd /STK=0 /UG=Hs.26045 /LL=5786 /UG_GENE=PTPRA /UG_TITLE=protein tyrosine phosphatase, receptor type, A /DEF=Human DNA sequence from clone RP4-534B8 on chromosome 20 Contains ESTs, STSs, GSSs and CpG islands. Contains the PTPRA gene for two isoforms of the alpha polypeptide of receptor type protein tyrosine phosphatase, …
FGD4	227948_at	5.95968e-08	3.56436e-10	3.79464	1.92396	3.79464	up	4.19976	2.07031	4.19976	up	-0.517717	1.40625	1.55259	121512	Hs.117835	gb:AI949549 /DB_XREF=gi:5741859 /DB_XREF=wq11h04.x1 /CLONE=IMAGE:2470999 /FEA=EST /CNT=23 /TID=Hs.293097.0 /TIER=Stack /STK=14 /UG=Hs.293097 /UG_TITLE=ESTs, Weakly similar to A55380 faciogenital dysplasia-associated protein FGD1 (H.sapiens)
SLC25A40	205716_at	6.00057e-08	3.5998e-10	3.34306	1.74117	3.34306	up	3.54745	1.82678	3.54745	up	-0.600627	1.14054	1.22616	55972	Hs.208414	gb:NM_018843.1 /DB_XREF=gi:10047121 /GEN=LOC55972 /FEA=FLmRNA /CNT=24 /TID=Hs.172294.0 /TIER=FL /STK=5 /UG=Hs.172294 /LL=55972 /DEF=Homo sapiens mitochondrial carrier family protein (LOC55972), mRNA. /PROD=mitochondrial carrier family protein /FL=gb:NM_018843.1 gb:AF125531.1
CCND2	200951_s_at	6.01029e-08	3.61662e-10	-10.721	-3.42236	10.721	down	-2.12645	-1.08845	2.12645	down	0.318207	-3.10416	-0.770242	894	Hs.376071	gb:AW026491 /DB_XREF=gi:5880021 /DB_XREF=wv14b06.x1 /CLONE=IMAGE:2529491 /FEA=FLmRNA /CNT=309 /TID=Hs.75586.0 /TIER=Stack /STK=15 /UG=Hs.75586 /LL=894 /UG_GENE=CCND2 /UG_TITLE=cyclin D2 /FL=gb:M90813.1 gb:NM_001759.1 gb:D13639.1
QARS	217846_at	6.20952e-08	3.77058e-10	-1.6412	-0.714753	1.6412	down	-1.78447	-0.835499	1.78447	down	0.307626	-0.407127	-0.527873	5859	Hs.79322	gb:NM_005051.1 /DB_XREF=gi:4826959 /GEN=QARS /FEA=FLmRNA /CNT=209 /TID=Hs.79322.0 /TIER=FL+Stack /STK=121 /UG=Hs.79322 /LL=5859 /DEF=Homo sapiens glutaminyl-tRNA synthetase (QARS), mRNA. /PROD=glutaminyl-tRNA synthetase /FL=gb:AF130067.1 gb:BC000394.1 gb:BC001772.1 gb:NM_005051.1
UBE2F	225787_at	6.20952e-08	3.76822e-10	1.8909	0.919076	1.8909	up	3.43158	1.77887	3.43158	up	-0.474854	0.444222	1.30402	140739	Hs.471785	gb:AI799788 /DB_XREF=gi:5365260 /DB_XREF=wc43b12.x1 /CLONE=IMAGE:2321375 /FEA=EST /CNT=94 /TID=Hs.289051.0 /TIER=Stack /STK=12 /UG=Hs.289051 /UG_TITLE=Homo sapiens cDNA FLJ13857 fis, clone THYRO1001003, weakly similar to UBIQUITIN-CONJUGATING ENZYME E2-21.2 KD (EC 6.3.2.19)
GLTP	226177_at	6.20952e-08	3.75731e-10	1.24437	0.315413	1.24437	up	2.34791	1.23137	2.34791	up	-0.264837	0.0505752	0.966537	51228	Hs.381256	gb:AI052020 /DB_XREF=gi:3308011 /DB_XREF=oy29e06.x1 /CLONE=IMAGE:1667266 /FEA=EST /CNT=56 /TID=Hs.3593.0 /TIER=Stack /STK=34 /UG=Hs.3593 /UG_TITLE=ESTs
NFE2	209930_s_at	6.22419e-08	3.79086e-10	1.99916	0.999395	1.99916	up	2.53953	1.34456	2.53953	up	-0.523913	0.475482	0.820646	4778	Hs.75643	gb:L13974.1 /DB_XREF=gi:506817 /FEA=FLmRNA /CNT=57 /TID=Hs.75643.1 /TIER=FL /STK=0 /UG=Hs.75643 /LL=4778 /UG_GENE=NFE2 /DEF=Human leucine zipper mRNA, complete cds. /PROD=leucine zipper protein /FL=gb:BC005044.1 gb:L24122.1 gb:L13974.1
ILF3	217804_s_at	6.30861e-08	3.85382e-10	-5.22403	-2.38516	5.22403	down	-2.43307	-1.28277	2.43307	down	0.535567	-1.8496	-0.747208	3609	Hs.465885	gb:BC003086.1 /DB_XREF=gi:13111838 /FEA=FLmRNA /CNT=233 /TID=Hs.256583.0 /TIER=FL /STK=0 /UG=Hs.256583 /LL=3609 /UG_GENE=ILF3 /DEF=Homo sapiens, hypothetical protein FLJ20011, clone MGC:1080, mRNA, complete cds. /PROD=hypothetical protein FLJ20011 /FL=gb:AF167570.1 gb:U10324.1 gb:NM_004516.1 gb:NM_012218.1 gb:BC003086.1
STMN3	222557_at	6.30881e-08	3.86548e-10	-1.63282	-0.707362	1.63282	down	-2.49691	-1.32014	2.49691	down	0.300549	-0.406813	-1.0196	50861	Hs.639609	gb:AL353715 /DB_XREF=gi:11121028 /FEA=FLmRNA /CNT=140 /TID=Hs.285753.0 /TIER=Stack /STK=66 /UG=Hs.285753 /LL=50861 /UG_GENE=SCLIP /UG_TITLE=SCG10-like-protein /DEF=Human DNA sequence from clone CTD-3184A7 on chromosome 20 Contains the 5 end of the GMEB2 (KIAA1269) gene for glucocorticoid modulatory element binding protein 2, the gene for SCG10-like protein (SCLIP) (ortholog of rabbit neuroplastic…
LAMTOR5	202300_at	6.34821e-08	3.90123e-10	2.42601	1.27858	2.42601	up	2.95617	1.56373	2.95617	up	-0.365242	0.913342	1.19849	10542	Hs.439815	gb:NM_006402.1 /DB_XREF=gi:5454169 /GEN=XIP /FEA=FLmRNA /CNT=201 /TID=Hs.80464.0 /TIER=FL+Stack /STK=105 /UG=Hs.80464 /LL=10542 /DEF=Homo sapiens hepatitis B virus x-interacting protein (9.6kD) (XIP), mRNA. /PROD=hepatitis B virus x-interacting protein /FL=gb:NM_006402.1 gb:AF029890.1
	237544_at	6.50106e-08	4.00706e-10	1.98596	0.989834	1.98596	up	4.05663	2.02028	4.05663	up	-0.621635	0.368199	1.39865			gb:BF508786 /DB_XREF=gi:11592084 /DB_XREF=UI-H-BI4-aoq-g-10-0-UI.s1 /CLONE=IMAGE:3086010 /FEA=EST /CNT=5 /TID=Hs.170348.0 /TIER=ConsEnd /STK=5 /UG=Hs.170348 /UG_TITLE=ESTs
PCED1B	228298_at	6.50601e-08	4.02201e-10	-3.61973	-1.85588	3.61973	down	-4.81158	-2.26651	4.81158	down	0.404488	-1.4514	-1.86202	91523	Hs.560100	gb:BF056901 /DB_XREF=gi:10810797 /DB_XREF=7k11d11.x1 /CLONE=IMAGE:3444140 /FEA=EST /CNT=22 /TID=Hs.181261.0 /TIER=Stack /STK=18 /UG=Hs.181261 /UG_TITLE=ESTs
IRAK3	1568830_at	6.59193e-08	4.08718e-10	2.47728	1.30876	2.47728	up	6.70046	2.74426	6.70046	up	-0.428859	0.879899	2.3154	11213	Hs.369265	gb:BC029493.1 /DB_XREF=gi:20810473 /TID=Hs2.398198.1 /CNT=5 /FEA=mRNA /TIER=ConsEnd /STK=1 /UG=Hs.398198 /UG_TITLE=Homo sapiens, Similar to interleukin-1 receptor-associated kinase M, clone IMAGE:5271512, mRNA /DEF=Homo sapiens, Similar to interleukin-1 receptor-associated kinase M, clone IMAGE:5271512, mRNA.
GIMAP1-GIMAP5///GIMAP5	64064_at	6.61843e-08	4.11571e-10	-1.854	-0.890642	1.854	down	-2.68224	-1.42344	2.68224	down	0.257212	-0.63343	-1.16623	55340///100527949	Hs.647079	Cluster Incl. AI435089:th95b11.x1 Homo sapiens cDNA, 3 end /clone=IMAGE-2126397 /clone_end=3' /gb=AI435089 /gi=4300737 /ug=Hs.26194 /len=891
SPCS3	218817_at	6.62272e-08	4.14558e-10	2.05977	1.04248	2.05977	up	3.55796	1.83105	3.55796	up	-0.372156	0.670328	1.45889	60559	Hs.42194	gb:NM_021928.1 /DB_XREF=gi:11345461 /GEN=FLJ22649 /FEA=FLmRNA /CNT=68 /TID=Hs.42194.0 /TIER=FL /STK=0 /UG=Hs.42194 /LL=60559 /DEF=Homo sapiens hypothetical protein FLJ22649 similar to signal peptidase SPC2223 (FLJ22649), mRNA. /PROD=hypothetical protein FLJ22649 similar to signalpeptidase SPC2223 /FL=gb:NM_021928.1 gb:AL136660.1
MOSPD2	221895_at	6.62272e-08	4.15472e-10	2.73233	1.45013	2.73233	up	2.10024	1.07055	2.10024	up	-0.293513	1.15662	0.777041	158747	Hs.744919	gb:AW469184 /DB_XREF=gi:7039290 /DB_XREF=hc78g04.x1 /CLONE=IMAGE:2898870 /FEA=EST /CNT=53 /TID=Hs.65406.0 /TIER=Stack /STK=18 /UG=Hs.65406 /UG_TITLE=ESTs
LINC01550	1559097_at	6.62272e-08	4.13796e-10	-1.89403	-0.921458	1.89403	down	-3.27184	-1.7101	3.27184	down	0.279767	-0.641691	-1.43034	388011	Hs.651477	gb:AK091668.1 /DB_XREF=gi:21750091 /TID=Hs2.429516.1 /CNT=7 /FEA=mRNA /TIER=ConsEnd /STK=0 /UG=Hs.429516 /UG_TITLE=Homo sapiens cDNA FLJ34349 fis, clone FEBRA2011063. /DEF=Homo sapiens cDNA FLJ34349 fis, clone FEBRA2011063.
	239780_at	6.64192e-08	4.17892e-10	3.30678	1.72543	3.30678	up	4.15376	2.05442	4.15376	up	-0.844245	0.881183	1.21017		Hs.662783	gb:AA468422 /DB_XREF=gi:2194956 /DB_XREF=nc78f02.r1 /CLONE=IMAGE:783483 /FEA=EST /CNT=8 /TID=Hs.267200.0 /TIER=ConsEnd /STK=0 /UG=Hs.267200 /UG_TITLE=ESTs, Moderately similar to T20D3.3 (C.elegans)
TMEM183A///TMEM183B	212165_at	6.6565e-08	4.20026e-10	1.79379	0.843011	1.79379	up	1.82913	0.871159	1.82913	up	-0.398913	0.444098	0.472246	92703///653659	Hs.497443///Hs.652908	gb:AF070537.1 /DB_XREF=gi:3387894 /FEA=mRNA /CNT=181 /TID=Hs.17481.1 /TIER=Stack /STK=9 /UG=Hs.17481 /UG_TITLE=Homo sapiens clone 24606 mRNA sequence /DEF=Homo sapiens clone 24606 mRNA sequence.
TXNDC17	224511_s_at	6.68481e-08	4.23035e-10	1.20669	0.271061	1.20669	up	2.39528	1.2602	2.39528	up	-0.208212	0.0628487	1.05199	84817	Hs.408236	gb:BC006405.1 /DB_XREF=gi:13623580 /FEA=FLmRNA /CNT=1 /TID=HsAffx.901060.661 /TIER=FL /STK=0 /DEF=Homo sapiens, clone MGC:14353, mRNA, complete cds. /PROD=Unknown (protein for MGC:14353) /FL=gb:BC006405.1
SLC2A14///SLC2A3	222088_s_at	6.68708e-08	4.24402e-10	3.39407	1.76302	3.39407	up	5.18551	2.37448	5.18551	up	-0.684503	1.07851	1.68998	6515///144195	Hs.419240///Hs.655169	gb:AA778684 /DB_XREF=gi:2838015 /DB_XREF=af87g07.s1 /CLONE=1049052 /FEA=EST /CNT=12 /TID=Hs.7594.1 /TIER=Stack /STK=11 /UG=Hs.7594 /LL=6515 /UG_GENE=SLC2A3 /UG_TITLE=solute carrier family 2 (facilitated glucose transporter), member 3
LAT	211005_at	6.71662e-08	4.27505e-10	-3.88294	-1.95715	3.88294	down	-4.01258	-2.00453	4.01258	down	0.601079	-1.35607	-1.40345	27040	Hs.632179	gb:AF036906.1 /DB_XREF=gi:2828025 /GEN=LAT /FEA=FLmRNA /CNT=4 /TID=Hs.83496.1 /TIER=FL /STK=0 /UG=Hs.83496 /LL=27040 /DEF=Homo sapiens linker for activation of T cells (LAT) mRNA, alternatively spliced form, complete cds. /PROD=LAT /FL=gb:NM_014387.1 gb:AF036906.1
SKAP2	225639_at	6.76048e-08	4.31533e-10	2.28174	1.19014	2.28174	up	3.6167	1.85467	3.6167	up	-0.396201	0.793935	1.45847	8935	Hs.200770	gb:N21390 /DB_XREF=gi:1126560 /DB_XREF=yx54d08.s1 /CLONE=IMAGE:265551 /FEA=EST /CNT=77 /TID=Hs.5888.0 /TIER=Stack /STK=39 /UG=Hs.5888 /UG_TITLE=ESTs
MIR1244-1///MIR1244-2///MIR1244-3///MIR1244-4	216515_x_at	6.76272e-08	4.36624e-10	-3.78411	-1.91996	3.78411	down	-2.03651	-1.0261	2.03651	down	0.704406	-1.21555	-0.321695	100302285///100422872///100422885///103504734		gb:AL121585 /DB_XREF=gi:8248733 /FEA=DNA_1 /CNT=1 /TID=Hs.283864.0 /TIER=ConsEnd /STK=0 /UG=Hs.283864 /UG_TITLE=Human DNA sequence from clone RP11-504H3 on chromosome 20 Contains the SNX5 gene (sorting nexin 5), a gene similar to PTMA (prothymosin-alpha), the 3 end of a gene encoding a Zinc-finger protein, two CpG islands, ESTs, STSs and GSSs /DEF=Human DNA sequence from clone RP11-504H3 on chrom…
STRN	236388_at	6.76272e-08	4.35855e-10	2.13374	1.09339	2.13374	up	1.94016	0.956176	1.94016	up	-0.426307	0.66708	0.529869	6801	Hs.127486	gb:BF112161 /DB_XREF=gi:10941851 /DB_XREF=7l48b08.x1 /CLONE=IMAGE:3524678 /FEA=EST /CNT=6 /TID=Hs.135162.0 /TIER=ConsEnd /STK=5 /UG=Hs.135162 /UG_TITLE=ESTs
FCER1G	1554899_s_at	6.76272e-08	4.36219e-10	1.64591	0.718884	1.64591	up	4.06678	2.02389	4.06678	up	-0.411857	0.307027	1.61203	2207	Hs.433300	gb:BC020763.1 /DB_XREF=gi:18088866 /TID=Hs2.433300.2 /CNT=3 /FEA=FLmRNA /TIER=FL /STK=1 /LL=2207 /UG_GENE=FCER1G /UG=Hs.433300 /DEF=Homo sapiens, Similar to Fc fragment of IgE, high affinity I, receptor for; gamma polypeptide, clone MGC:22620 IMAGE:4704425, mRNA, complete cds. /PROD=Similar to Fc fragment of IgE, high affinity I,receptor for; gamma polypeptide /FL=gb:BC020763.1
C8orf88	1557961_s_at	6.76272e-08	4.36429e-10	2.53667	1.34294	2.53667	up	4.49162	2.16724	4.49162	up	-0.765391	0.577545	1.40184	100127983	Hs.733266	gb:BG492376 /DB_XREF=gi:13453888 /DB_XREF=602536302F1 /CLONE=IMAGE:4655161 /TID=Hs2.356149.1 /CNT=36 /FEA=mRNA /TIER=ConsEnd /STK=0 /UG=Hs.356149 /UG_TITLE=Homo sapiens cDNA FLJ25490 fis, clone CBR00320.
SMPDL3A	213624_at	6.76762e-08	4.38178e-10	2.31114	1.2086	2.31114	up	10.6463	3.41228	10.6463	up	-0.778922	0.42968	2.63336	10924	Hs.486357	gb:AA873600 /DB_XREF=gi:2969722 /DB_XREF=ob12a02.s1 /CLONE=IMAGE:1323434 /FEA=mRNA /CNT=36 /TID=Hs.42945.0 /TIER=Stack /STK=23 /UG=Hs.42945 /LL=10924 /UG_GENE=ASM3A /UG_TITLE=acid sphingomyelinase-like phosphodiesterase
MS4A6A	223280_x_at	6.81685e-08	4.42612e-10	2.04915	1.03503	2.04915	up	3.1933	1.67505	3.1933	up	-0.314403	0.720624	1.36064	64231	Hs.523702	gb:AF253977.1 /DB_XREF=gi:12005800 /FEA=FLmRNA /CNT=132 /TID=Hs.17914.1 /TIER=FL+Stack /STK=74 /UG=Hs.17914 /LL=64231 /UG_GENE=MS4A6 /DEF=Homo sapiens HAIRB-iso mRNA, complete cds. /PROD=HAIRB-iso /FL=gb:AF261136.1 gb:AF253977.1 gb:AF212240.1
ACTR2	200727_s_at	6.82715e-08	4.44892e-10	-2.07429	-1.05262	2.07429	down	1.81027	0.856203	1.81027	up	-0.0580996	-1.11072	0.798103	10097	Hs.744913	gb:AA699583 /DB_XREF=gi:2703730 /DB_XREF=zi42g07.s1 /CLONE=IMAGE:433500 /FEA=FLmRNA /CNT=473 /TID=Hs.42915.0 /TIER=Stack /STK=9 /UG=Hs.42915 /LL=10097 /UG_GENE=ACTR2 /UG_TITLE=ARP2 (actin-related protein 2, yeast) homolog /FL=gb:AF006082.1 gb:NM_005722.1
MAN1C1	218918_at	6.82715e-08	4.47027e-10	-3.15198	-1.65626	3.15198	down	-3.94957	-1.9817	3.94957	down	0.71763	-0.938628	-1.26407	57134	Hs.197043	gb:NM_020379.1 /DB_XREF=gi:9966902 /GEN=HMIC /FEA=FLmRNA /CNT=96 /TID=Hs.8910.0 /TIER=FL /STK=0 /UG=Hs.8910 /LL=57134 /DEF=Homo sapiens 1,2-alpha-mannosidase IC (HMIC), mRNA. /PROD=1,2-alpha-mannosidase IC /FL=gb:AF261655.1 gb:NM_020379.1
CD79A	1555779_a_at	6.82715e-08	4.46362e-10	-2.3298	-1.22021	2.3298	down	-2.65671	-1.40964	2.65671	down	0.945574	-0.274631	-0.464069	973	Hs.631567	gb:M74721.1 /DB_XREF=gi:337419 /GEN=MB-1 /TID=Hs2.79630.3 /CNT=23 /FEA=FLmRNA /TIER=FL /STK=0 /LL=973 /UG=Hs.79630 /DEF=Human B-cell antigen receptor (MB-1) mRNA, complete cds. /PROD=B-cell antigen receptor alpha subunit /FL=gb:M74721.1
MRPS6	224919_at	6.83333e-08	4.48681e-10	-1.73489	-0.794845	1.73489	down	-1.90801	-0.932069	1.90801	down	0.42331	-0.371535	-0.508759	64968	Hs.302742	gb:AL555227 /DB_XREF=gi:12896757 /DB_XREF=AL555227 /CLONE=CS0DK007YC04 (5 prime) /FEA=mRNA /CNT=167 /TID=Hs.6945.0 /TIER=Stack /STK=17 /UG=Hs.6945 /UG_TITLE=Homo sapiens, clone IMAGE:2958115, mRNA, partial cds
	237563_s_at	6.8957e-08	4.54038e-10	1.97901	0.98478	1.97901	up	4.0275	2.00989	4.0275	up	-0.68452	0.30026	1.32537			gb:AI286239 /DB_XREF=gi:3924472 /DB_XREF=qi02g05.x1 /CLONE=IMAGE:1855352 /FEA=EST /CNT=5 /TID=Hs.181156.0 /TIER=ConsEnd /STK=5 /UG=Hs.181156 /UG_TITLE=ESTs
ERH	200043_at	6.90455e-08	4.55883e-10	-1.66971	-0.739598	1.66971	down	2.13985	1.09751	2.13985	up	0.00898035	-0.730618	1.10649	2079	Hs.509791	gb:NM_004450.1 /DB_XREF=gi:4758301 /GEN=ERH /FEA=FLmRNA /CNT=223 /TID=Hs.118757.0 /TIER=FL+Stack /STK=91 /UG=Hs.118757 /LL=2079 /DEF=Homo sapiens enhancer of rudimentary (Drosophila) homolog (ERH), mRNA. /PROD=enhancer of rudimentary (Drosophila) homolog /FL=gb:D85758.1 gb:NM_004450.1 gb:U66871.1
CD59	200983_x_at	7.00919e-08	4.65357e-10	2.26644	1.18043	2.26644	up	4.85839	2.28048	4.85839	up	-0.573479	0.606951	1.707	966	Hs.278573///Hs.709466	gb:BF983379 /DB_XREF=gi:12386191 /DB_XREF=602305270F1 /CLONE=IMAGE:4396576 /FEA=FLmRNA /CNT=428 /TID=Hs.119663.0 /TIER=Stack /STK=83 /UG=Hs.119663 /LL=966 /UG_GENE=CD59 /UG_TITLE=CD59 antigen p18-20 (antigen identified by monoclonal antibodies 16.3A5, EJ16, EJ30, EL32 and G344) /FL=gb:NM_000611.1 gb:M34671.1
PLXDC1	219700_at	7.00919e-08	4.64296e-10	-2.18184	-1.12555	2.18184	down	-3.11069	-1.63723	3.11069	down	0.591905	-0.533641	-1.04533	57125	Hs.125036	gb:NM_020405.1 /DB_XREF=gi:9966886 /GEN=TEM7 /FEA=FLmRNA /CNT=19 /TID=Hs.125036.0 /TIER=FL /STK=4 /UG=Hs.125036 /LL=57125 /DEF=Homo sapiens tumor endothelial marker 7 precursor (TEM7), mRNA. /PROD=tumor endothelial marker 7 precursor /FL=gb:NM_020405.1 gb:AF279144.1
CDC25B	201853_s_at	7.07179e-08	4.70806e-10	-2.71298	-1.43988	2.71298	down	-2.6838	-1.42428	2.6838	down	0.349761	-1.09012	-1.07451	994	Hs.153752	gb:NM_021873.1 /DB_XREF=gi:11641412 /GEN=CDC25B /FEA=FLmRNA /CNT=220 /TID=Hs.153752.1 /TIER=FL+Stack /STK=51 /UG=Hs.153752 /LL=994 /DEF=Homo sapiens cell division cycle 25B (CDC25B), transcript variant 3, mRNA. /PROD=cell division cycle 25B, isoform 3 /FL=gb:NM_021873.1
DYSF	218660_at	7.07759e-08	4.72486e-10	2.77711	1.47359	2.77711	up	4.31657	2.10989	4.31657	up	-0.798756	0.674831	1.31113	8291	Hs.252180	gb:NM_003494.1 /DB_XREF=gi:4503430 /GEN=DYSF /FEA=FLmRNA /CNT=68 /TID=Hs.143897.0 /TIER=FL /STK=0 /UG=Hs.143897 /LL=8291 /DEF=Homo sapiens dysferlin, limb girdle muscular dystrophy 2B (autosomal recessive) (DYSF), mRNA. /PROD=dysferlin /FL=gb:AF075575.1 gb:NM_003494.1
BIN1	210201_x_at	7.08212e-08	4.74084e-10	-2.24751	-1.16833	2.24751	down	-1.96698	-0.97598	1.96698	down	0.577607	-0.590719	-0.398373	274	Hs.193163	gb:AF001383.1 /DB_XREF=gi:2199534 /FEA=FLmRNA /CNT=16 /TID=Hs.193163.3 /TIER=FL /STK=0 /UG=Hs.193163 /LL=274 /UG_GENE=BIN1 /DEF=Homo sapiens amphiphysin II mRNA, complete cds. /PROD=amphiphysin II /FL=gb:AF068917.1 gb:AF001383.1
	1556402_at	7.16092e-08	4.80669e-10	-2.51838	-1.33249	2.51838	down	-2.85013	-1.51103	2.85013	down	0.668698	-0.663797	-0.842328		Hs.252040	gb:CA425190 /DB_XREF=gi:24787916 /DB_XREF=UI-H-DF0-bel-k-01-0-UI.s1 /CLONE=UI-H-DF0-bel-k-01-0-UI /TID=Hs2.203743.1 /CNT=5 /FEA=mRNA /TIER=ConsEnd /STK=3 /UG=Hs.203743 /UG_TITLE=Homo sapiens cDNA FLJ36234 fis, clone THYMU2001314.
BATF	205965_at	7.38063e-08	4.96766e-10	-1.01327	-0.0190222	1.01327	down	2.26046	1.17662	2.26046	up	-0.113518	-0.13254	1.0631	10538	Hs.509964	gb:NM_006399.1 /DB_XREF=gi:5453562 /GEN=BATF /FEA=FLmRNA /CNT=24 /TID=Hs.41691.0 /TIER=FL+Stack /STK=13 /UG=Hs.41691 /LL=10538 /DEF=Homo sapiens basic leucine zipper transcription factor, ATF-like (BATF), mRNA. /PROD=basic leucine zipper transcription factor,ATF-like /FL=gb:U15460.1 gb:D42106.1 gb:NM_006399.1
CPD	201940_at	7.56158e-08	5.10766e-10	3.48723	1.80208	3.48723	up	3.2315	1.6922	3.2315	up	-0.59622	1.20586	1.09598	1362	Hs.446079	gb:AA897514 /DB_XREF=gi:3034134 /DB_XREF=aj62b12.s1 /CLONE=IMAGE:1394879 /FEA=FLmRNA /CNT=187 /TID=Hs.5057.0 /TIER=Stack /STK=10 /UG=Hs.5057 /LL=1362 /UG_GENE=CPD /UG_TITLE=carboxypeptidase D /FL=gb:U65090.1 gb:D85390.1 gb:NM_001304.2
FXYD5	218084_x_at	7.56158e-08	5.11712e-10	-1.92038	-0.94139	1.92038	down	-1.68309	-0.751113	1.68309	down	0.357789	-0.583601	-0.393324	53827	Hs.333418	gb:NM_014164.2 /DB_XREF=gi:11612664 /GEN=FXYD5 /FEA=FLmRNA /CNT=111 /TID=Hs.294135.0 /TIER=FL+Stack /STK=52 /UG=Hs.294135 /LL=53827 /DEF=Homo sapiens FXYD domain-containing ion transport regulator 5 (FXYD5), mRNA. /PROD=related to ion channel /FL=gb:NM_014164.2 gb:AF161462.1
CD79A	205049_s_at	7.63927e-08	5.18573e-10	-3.31794	-1.73029	3.31794	down	-3.53744	-1.82271	3.53744	down	0.950394	-0.779895	-0.872313	973	Hs.631567	gb:NM_001783.1 /DB_XREF=gi:4502684 /GEN=CD79A /FEA=FLmRNA /CNT=133 /TID=Hs.79630.0 /TIER=FL+Stack /STK=36 /UG=Hs.79630 /LL=973 /DEF=Homo sapiens CD79A antigen (immunoglobulin-associated alpha) (CD79A), transcript variant 1, mRNA. /PROD=CD79A antigen, isoform 1 precursor /FL=gb:M74721.1 gb:NM_001783.1 gb:M86921.1 gb:M80462.1
CCPG1	221156_x_at	7.63927e-08	5.19764e-10	2.43213	1.28222	2.43213	up	7.6603	2.9374	7.6603	up	-0.71953	0.562689	2.21787	9236	Hs.285051	gb:NM_004748.1 /DB_XREF=gi:4758047 /GEN=CPR8 /FEA=FLmRNA /CNT=2 /TID=Hs.283753.0 /TIER=FL /STK=0 /UG=Hs.283753 /LL=9236 /DEF=Homo sapiens cell cycle progression 8 protein (CPR8), mRNA. /PROD=cell cycle progression 8 protein /FL=gb:AF011794.1 gb:NM_004748.1
RFTN1	212646_at	7.70108e-08	5.25378e-10	-1.46804	-0.553887	1.46804	down	-2.31822	-1.21302	2.31822	down	0.350794	-0.203094	-0.862225	23180	Hs.98910	gb:D42043.1 /DB_XREF=gi:577298 /GEN=KIAA0084 /FEA=mRNA /CNT=159 /TID=Hs.79123.1 /TIER=Stack /STK=76 /UG=Hs.79123 /LL=23180 /UG_TITLE=KIAA0084 protein /DEF=Human mRNA for KIAA0084 gene, partial cds.
FAM102A	212400_at	7.74446e-08	5.29754e-10	-2.13159	-1.09193	2.13159	down	-3.54788	-1.82696	3.54788	down	0.385317	-0.706613	-1.44164	399665	Hs.535972	gb:AL043266 /DB_XREF=gi:5935844 /DB_XREF=DKFZp434L1423_s1 /CLONE=DKFZp434L1423 /FEA=mRNA /CNT=154 /TID=Hs.111334.4 /TIER=Stack /STK=67 /UG=Hs.111334 /LL=2512 /UG_GENE=FTL /UG_TITLE=ferritin, light polypeptide
SPIB	205861_at	7.786e-08	5.34019e-10	-6.16458	-2.624	6.16458	down	-4.63163	-2.21152	4.63163	down	0.98972	-1.63428	-1.2218	6689	Hs.437905	gb:NM_003121.1 /DB_XREF=gi:4507176 /GEN=SPIB /FEA=FLmRNA /CNT=34 /TID=Hs.192861.0 /TIER=FL /STK=4 /UG=Hs.192861 /LL=6689 /DEF=Homo sapiens Spi-B transcription factor (Spi-1PU.1 related) (SPIB), mRNA. /PROD=Spi-B transcription factor (Spi-1PU.1 related) /FL=gb:NM_003121.1
TTC31	218838_s_at	7.97985e-08	5.48774e-10	-1.4508	-0.536853	1.4508	down	-1.56775	-0.648693	1.56775	down	0.275016	-0.261837	-0.373677	64427	Hs.557709	gb:NM_022492.1 /DB_XREF=gi:11968048 /GEN=FLJ12788 /FEA=FLmRNA /CNT=80 /TID=Hs.20242.0 /TIER=FL+Stack /STK=43 /UG=Hs.20242 /LL=64427 /DEF=Homo sapiens hypothetical protein FLJ12788 (FLJ12788), mRNA. /PROD=hypothetical protein FLJ12788 /FL=gb:NM_022492.1
CCPG1///DYX1C1-CCPG1	221511_x_at	8.03657e-08	5.54145e-10	2.21254	1.1457	2.21254	up	3.9654	1.98747	3.9654	up	-0.362771	0.782934	1.6247	9236///100533483	Hs.285051	gb:AB033080.1 /DB_XREF=gi:6330892 /GEN=KIAA1254 /FEA=FLmRNA /CNT=143 /TID=Hs.82506.0 /TIER=Stack /STK=11 /UG=Hs.82506 /LL=57499 /DEF=Homo sapiens mRNA for KIAA1254 protein, partial cds. /PROD=KIAA1254 protein /FL=gb:AF212228.1
	233264_at	8.08593e-08	5.59027e-10	2.01487	1.01068	2.01487	up	2.3162	1.21176	2.3162	up	-0.349591	0.661094	0.862167			gb:AU146901 /DB_XREF=gi:11008422 /DB_XREF=AU146901 /CLONE=HEMBB1001816 /FEA=mRNA /CNT=4 /TID=Hs.289059.0 /TIER=ConsEnd /STK=2 /UG=Hs.289059 /UG_TITLE=Homo sapiens cDNA FLJ12026 fis, clone HEMBB1001816
MRPS18B	217408_at	8.10754e-08	5.62004e-10	-2.21785	-1.14916	2.21785	down	-2.14246	-1.09927	2.14246	down	0.427414	-0.721751	-0.671854	28973	Hs.655329	gb:AL050361.1 /DB_XREF=gi:4914594 /FEA=mRNA /CNT=1 /TID=Hs.274417.2 /TIER=ConsEnd /STK=0 /UG=Hs.274417 /LL=28973 /UG_GENE=PTD017 /UG_TITLE=PTD017 protein /DEF=Homo sapiens mRNA; cDNA DKFZp564H0223 (from clone DKFZp564H0223).
RPL22	221775_x_at	8.13172e-08	5.65167e-10	-2.98942	-1.57986	2.98942	down	-1.8313	-0.872866	1.8313	down	0.43029	-1.14957	-0.442576	6146	Hs.515329///Hs.554762	gb:BG152979 /DB_XREF=gi:12665009 /DB_XREF=nah24c06.y1 /CLONE=IMAGE:4232050 /FEA=EST /CNT=79 /TID=Hs.99914.2 /TIER=Stack /STK=24 /UG=Hs.99914 /LL=6146 /UG_GENE=RPL22 /UG_TITLE=ribosomal protein L22
RNF141	219104_at	8.13849e-08	5.67127e-10	1.54033	0.623241	1.54033	up	2.05694	1.0405	2.05694	up	-0.346606	0.276635	0.693895	50862	Hs.44685	gb:NM_016422.1 /DB_XREF=gi:7706776 /GEN=ZFP26 /FEA=FLmRNA /CNT=43 /TID=Hs.44685.0 /TIER=FL+Stack /STK=11 /UG=Hs.44685 /LL=50862 /DEF=Homo sapiens C3HC4-like zinc finger protein (ZFP26), mRNA. /PROD=C3HC4-like zinc finger protein /FL=gb:NM_016422.1 gb:AF214680.1
MAP1LC3B	208785_s_at	8.20931e-08	5.73563e-10	2.66563	1.41448	2.66563	up	2.78119	1.4757	2.78119	up	-0.371644	1.04283	1.10406	81631	Hs.356061///Hs.506947	gb:BE893893 /DB_XREF=gi:10355716 /DB_XREF=601436260F1 /CLONE=IMAGE:3921446 /FEA=FLmRNA /CNT=401 /TID=Hs.121849.0 /TIER=Stack /STK=66 /UG=Hs.121849 /LL=81631 /UG_GENE=MAP1A1BLC3 /UG_TITLE=microtubule-associated proteins 1A1B light chain 3 /FL=gb:AF303888.1 gb:NM_022818.2 gb:AF183417.1
ZRANB1	225131_at	8.23409e-08	5.768e-10	1.90846	0.932412	1.90846	up	1.77571	0.828398	1.77571	up	-0.373379	0.559032	0.455018	54764	Hs.595158	gb:H60265 /DB_XREF=gi:1013097 /DB_XREF=yr41c06.r1 /CLONE=IMAGE:207850 /FEA=mRNA /CNT=129 /TID=Hs.26320.0 /TIER=Stack /STK=9 /UG=Hs.26320 /LL=54764 /UG_GENE=TRABID /UG_TITLE=TRABID protein
WIPI1	213836_s_at	8.29375e-08	5.82497e-10	2.584	1.36961	2.584	up	4.01334	2.0048	4.01334	up	-0.548675	0.820934	1.45613	55062	Hs.463964	gb:AW052084 /DB_XREF=gi:5914443 /DB_XREF=wy86f07.x1 /CLONE=IMAGE:2555461 /FEA=EST /CNT=28 /TID=Hs.279937.1 /TIER=Stack /STK=28 /UG=Hs.279937 /LL=22901 /UG_GENE=KIAA1001 /UG_TITLE=KIAA1001 protein
ACER3	222689_at	8.30145e-08	5.84556e-10	2.37833	1.24995	2.37833	up	5.98756	2.58197	5.98756	up	-0.484963	0.764988	2.09701	55331	Hs.23862	gb:N51263 /DB_XREF=gi:1192429 /DB_XREF=yz14b06.s1 /CLONE=IMAGE:282995 /FEA=FLmRNA /CNT=80 /TID=Hs.23862.0 /TIER=Stack /STK=8 /UG=Hs.23862 /LL=55331 /UG_GENE=FLJ11238 /UG_TITLE=hypothetical protein FLJ11238 /FL=gb:NM_018367.1
C1orf162	228532_at	8.30481e-08	5.86311e-10	1.87276	0.905169	1.87276	up	2.78979	1.48015	2.78979	up	-0.408781	0.496388	1.07137	128346	Hs.288010	gb:AW662189 /DB_XREF=gi:7454726 /DB_XREF=hi21a10.x1 /CLONE=IMAGE:2972922 /FEA=EST /CNT=22 /TID=Hs.288010.0 /TIER=Stack /STK=12 /UG=Hs.288010 /UG_TITLE=ESTs
LEPROT	202378_s_at	8.37476e-08	5.92781e-10	1.91325	0.936022	1.91325	up	1.9963	0.997328	1.9963	up	-0.445698	0.490324	0.55163	54741	Hs.23581	gb:NM_017526.1 /DB_XREF=gi:8923784 /GEN=HSOBRGRP /FEA=FLmRNA /CNT=262 /TID=Hs.23581.0 /TIER=FL+Stack /STK=74 /UG=Hs.23581 /LL=54741 /DEF=Homo sapiens leptin receptor gene-related protein (HSOBRGRP), mRNA. /PROD=leptin receptor gene-related protein /FL=gb:NM_017526.1
GMFB	202543_s_at	8.37485e-08	5.94719e-10	3.63841	1.86331	3.63841	up	3.98836	1.9958	3.98836	up	-0.870261	0.993047	1.12554	2764	Hs.151413	gb:BC005359.1 /DB_XREF=gi:13529184 /FEA=FLmRNA /CNT=154 /TID=Hs.151413.0 /TIER=FL+Stack /STK=10 /UG=Hs.151413 /LL=2764 /UG_GENE=GMFB /DEF=Homo sapiens, glia maturation factor, beta, clone MGC:12462, mRNA, complete cds. /PROD=glia maturation factor, beta /FL=gb:AB001106.1 gb:NM_004124.1 gb:M86492.1 gb:BC005359.1
B4GALT5	221485_at	8.37485e-08	5.95983e-10	2.63614	1.39842	2.63614	up	3.65467	1.86974	3.65467	up	-0.592704	0.805721	1.27704	9334	Hs.370487	gb:AL035683 /DB_XREF=gi:7288039 /FEA=FLmRNA /CNT=236 /TID=Hs.107526.0 /TIER=Stack /STK=67 /UG=Hs.107526 /LL=9334 /UG_GENE=B4GALT5 /UG_TITLE=UDP-Gal:betaGlcNAc beta 1,4- galactosyltransferase, polypeptide 5 /DEF=Human DNA sequence from clone RP5-1063B2 on chromosome 20q13.1-13.2. Contains the 3 part of the gene for Beta-1,4-galactosyltransferase, ESTs, STSs and GSSs /FL=gb:AB004550.1 gb:NM_004776.…
THEM4	229253_at	8.37485e-08	5.97383e-10	-2.20125	-1.13832	2.20125	down	-2.37759	-1.2495	2.37759	down	0.443559	-0.694765	-0.80594	117145	Hs.164070	gb:AI184512 /DB_XREF=gi:3735150 /DB_XREF=qf29e10.x1 /CLONE=IMAGE:1751466 /FEA=EST /CNT=14 /TID=Hs.266155.0 /TIER=Stack /STK=8 /UG=Hs.266155 /UG_TITLE=ESTs
TP73-AS1	213340_s_at	8.62665e-08	6.16922e-10	-1.28929	-0.366579	1.28929	down	-1.60726	-0.684604	1.60726	down	0.186374	-0.180205	-0.49823	57212	Hs.49658	gb:AI073551 /DB_XREF=gi:3400195 /DB_XREF=ov45e10.x1 /CLONE=IMAGE:1640298 /FEA=mRNA /CNT=69 /TID=Hs.49658.0 /TIER=Stack /STK=17 /UG=Hs.49658 /LL=57212 /UG_GENE=KIAA0495 /UG_TITLE=KIAA0495
AGFG1	218091_at	8.67084e-08	6.21668e-10	2.68998	1.42759	2.68998	up	4.03275	2.01176	4.03275	up	-0.368495	1.0591	1.64327	3267	Hs.352962	gb:AI989512 /DB_XREF=gi:5836393 /DB_XREF=ws25f10.x1 /CLONE=IMAGE:2498251 /FEA=FLmRNA /CNT=153 /TID=Hs.171545.0 /TIER=Stack /STK=21 /UG=Hs.171545 /LL=3267 /UG_GENE=HRB /UG_TITLE=HIV-1 Rev binding protein /FL=gb:NM_004504.2
RTN4	210968_s_at	8.691e-08	6.24703e-10	1.7844	0.835438	1.7844	up	2.0752	1.05325	2.0752	up	-0.260828	0.574611	0.792421	57142	Hs.637850	gb:AF333336.1 /DB_XREF=gi:13377627 /FEA=FLmRNA /CNT=2 /TID=Hs.65450.2 /TIER=FL /STK=0 /UG=Hs.65450 /LL=57142 /UG_GENE=RTN4 /DEF=Homo sapiens testis specific reticulon 5 protein mRNA, complete cds. /PROD=testis specific reticulon 5 protein /FL=gb:AF333336.1
MTRF1L	225206_s_at	9.01831e-08	6.49879e-10	-1.07913	-0.109867	1.07913	down	2.09796	1.06899	2.09796	up	-0.119956	-0.229822	0.94903	54516	Hs.225836	gb:AI479199 /DB_XREF=gi:4372367 /DB_XREF=tm55f03.x1 /CLONE=IMAGE:2162045 /FEA=FLmRNA /CNT=98 /TID=Hs.70488.0 /TIER=Stack /STK=15 /UG=Hs.70488 /LL=54516 /UG_GENE=LOC54516 /UG_TITLE=similar to prokaryotic-type class I peptide chain release factors /FL=gb:NM_019041.1
TCF7	205254_x_at	9.04181e-08	6.5488e-10	-3.35728	-1.74729	3.35728	down	-4.32227	-2.11179	4.32227	down	0.391079	-1.35621	-1.72071	6932	Hs.573153	gb:AW027359 /DB_XREF=gi:5886115 /DB_XREF=wt73f08.x1 /CLONE=IMAGE:2513127 /FEA=FLmRNA /CNT=37 /TID=Hs.169294.0 /TIER=Stack /STK=8 /UG=Hs.169294 /LL=6932 /UG_GENE=TCF7 /UG_TITLE=transcription factor 7 (T-cell specific, HMG-box) /FL=gb:NM_003202.1
TRBC1///TRBC2///TRBV19///TRBV3-1///TRBV5-4///TRBV6-5///TRBV7-2	211796_s_at	9.04181e-08	6.54452e-10	-3.49694	-1.80609	3.49694	down	-6.07704	-2.60337	6.07704	down	0.456225	-1.34987	-2.14714	28568///28596///28602///28611///28619///28638///28639	Hs.382212///Hs.449262///Hs.449320///Hs.511720///Hs.745555	gb:AF043179.1 /DB_XREF=gi:3002924 /GEN=TCRBV13S1-TCRBJ2S1 /FEA=FLmRNA /CNT=3 /TID=Hs.303157.6 /TIER=FL /STK=0 /UG=Hs.303157 /LL=6957 /DEF=Homo sapiens T cell receptor beta chain (TCRBV13S1-TCRBJ2S1) mRNA, complete cds. /PROD=T cell receptor beta chain /FL=gb:AF043179.1
LDHB	213564_x_at	9.13476e-08	6.64954e-10	-2.40628	-1.2668	2.40628	down	-3.12244	-1.64267	3.12244	down	0.534998	-0.731805	-1.10767	3945	Hs.446149	gb:BE042354 /DB_XREF=gi:8359407 /DB_XREF=ho19b09.x1 /CLONE=IMAGE:3037817 /FEA=EST /CNT=27 /TID=Hs.234489.1 /TIER=Stack /STK=9 /UG=Hs.234489 /LL=3945 /UG_GENE=LDHB /UG_TITLE=lactate dehydrogenase B
RNF220	219988_s_at	9.13476e-08	6.64183e-10	-1.78118	-0.83283	1.78118	down	-1.38614	-0.471073	1.38614	down	0.290083	-0.542747	-0.180989	55182	Hs.456557	gb:NM_018150.1 /DB_XREF=gi:8922541 /GEN=FLJ10597 /FEA=FLmRNA /CNT=15 /TID=Hs.90375.0 /TIER=FL /STK=0 /UG=Hs.90375 /LL=55182 /DEF=Homo sapiens hypothetical protein FLJ10597 (FLJ10597), mRNA. /PROD=hypothetical protein FLJ10597 /FL=gb:NM_018150.1
MARCKSL1	200644_at	9.17907e-08	6.69858e-10	-3.63082	-1.8603	3.63082	down	-3.79489	-1.92406	3.79489	down	0.755201	-1.10509	-1.16886	65108	Hs.75061	gb:NM_023009.1 /DB_XREF=gi:13491173 /GEN=MACMARCKS /FEA=FLmRNA /CNT=486 /TID=Hs.75061.0 /TIER=FL+Stack /STK=208 /UG=Hs.75061 /LL=65108 /DEF=Homo sapiens macrophage myristoylated alanine-rich C kinase substrate (MACMARCKS), mRNA. /PROD=macrophage myristoylated alanine-rich C kinasesubstrate /FL=gb:NM_023009.1
LIN7A	227929_at	9.25602e-08	6.77166e-10	2.93535	1.55353	2.93535	up	4.07453	2.02663	4.07453	up	-0.610001	0.943532	1.41663	8825	Hs.586760	gb:AU151342 /DB_XREF=gi:11012863 /DB_XREF=AU151342 /CLONE=NT2RP2004982 /FEA=mRNA /CNT=28 /TID=Hs.22545.0 /TIER=Stack /STK=15 /UG=Hs.22545 /UG_TITLE=Homo sapiens cDNA FLJ12935 fis, clone NT2RP2004982
HNRNPC	1568941_a_at	9.26172e-08	6.79278e-10	-4.34197	-2.11835	4.34197	down	-1.15873	-0.212539	1.15873	down	0.358543	-1.75981	0.146004	3183		gb:BC022884.1 /DB_XREF=gi:22137370 /TID=Hs2.250158.1 /CNT=131 /FEA=mRNA /TIER=ConsEnd /STK=0 /UG=Hs.250158 /UG_TITLE=Homo sapiens, clone IMAGE:4294892, mRNA /DEF=Homo sapiens, clone IMAGE:4294892, mRNA.
EEF2	200094_s_at	9.26588e-08	6.82211e-10	-1.8841	-0.913872	1.8841	down	-2.44955	-1.29252	2.44955	down	0.478919	-0.434953	-0.813598	1938	Hs.515070	gb:AI004246 /DB_XREF=gi:3213756 /DB_XREF=ou03g06.x1 /CLONE=IMAGE:1625242 /FEA=EST /CNT=15 /TID=Hs.75309.1 /TIER=Stack /STK=9 /UG=Hs.75309 /LL=1938 /UG_GENE=EEF2 /UG_TITLE=eukaryotic translation elongation factor 2
COL4A3BP	226277_at	9.26588e-08	6.82972e-10	1.73536	0.795238	1.73536	up	2.42017	1.27511	2.42017	up	-0.317959	0.47728	0.957151	10087	Hs.270437	gb:AA889952 /DB_XREF=gi:3016831 /DB_XREF=aj95e08.s1 /CLONE=IMAGE:1404230 /FEA=EST /CNT=62 /TID=Hs.21276.2 /TIER=Stack /STK=31 /UG=Hs.21276 /LL=10087 /UG_GENE=COL4A3BP /UG_TITLE=collagen, type IV, alpha 3 (Goodpasture antigen) binding protein
CD44	212063_at	9.32942e-08	6.89362e-10	1.29658	0.374715	1.29658	up	2.47594	1.30797	2.47594	up	-0.213197	0.161518	1.09478	960	Hs.502328	gb:BE903880 /DB_XREF=gi:10395551 /DB_XREF=601494678F1 /CLONE=IMAGE:3896970 /FEA=EST /CNT=245 /TID=Hs.323950.2 /TIER=Stack /STK=104 /UG=Hs.323950 /LL=7552 /UG_GENE=ZNF6 /UG_TITLE=zinc finger protein 6 (CMPX1)
	242743_at	9.63891e-08	7.13994e-10	-1.17202	-0.229	1.17202	down	2.18686	1.12886	2.18686	up	-0.0425397	-0.27154	1.08632			gb:AA767714 /DB_XREF=gi:2818729 /DB_XREF=ob49b12.s1 /CLONE=IMAGE:1334687 /FEA=EST /CNT=5 /TID=Hs.291627.0 /TIER=ConsEnd /STK=3 /UG=Hs.291627 /UG_TITLE=ESTs
ESYT2	224698_at	9.87525e-08	7.33306e-10	-1.91137	-0.934608	1.91137	down	-2.05195	-1.03699	2.05195	down	0.583491	-0.351117	-0.453503	57488	Hs.490795	gb:AB033054.1 /DB_XREF=gi:6330689 /GEN=KIAA1228 /FEA=mRNA /CNT=171 /TID=Hs.267690.1 /TIER=Stack /STK=24 /UG=Hs.267690 /LL=57488 /DEF=Homo sapiens mRNA for KIAA1228 protein, partial cds. /PROD=KIAA1228 protein
CD27	206150_at	9.96316e-08	7.43479e-10	-3.34598	-1.74243	3.34598	down	-4.3131	-2.10873	4.3131	down	0.39392	-1.34851	-1.7148	939	Hs.355307	gb:NM_001242.1 /DB_XREF=gi:4507586 /GEN=TNFRSF7 /FEA=FLmRNA /CNT=31 /TID=Hs.180841.0 /TIER=FL+Stack /STK=21 /UG=Hs.180841 /LL=939 /DEF=Homo sapiens tumor necrosis factor receptor superfamily, member 7 (TNFRSF7), mRNA. /PROD=CD27 antigen /FL=gb:NM_001242.1 gb:M63928.1
P2RY8	229686_at	9.96316e-08	7.43233e-10	-2.15329	-1.10654	2.15329	down	-2.12898	-1.09016	2.12898	down	0.481029	-0.625515	-0.609136	286530	Hs.111377	gb:AI436587 /DB_XREF=gi:4282890 /DB_XREF=ti03d11.x1 /CLONE=IMAGE:2129397 /FEA=EST /CNT=18 /TID=Hs.111377.0 /TIER=Stack /STK=8 /UG=Hs.111377 /UG_TITLE=ESTs
TTC3	208073_x_at	1.00461e-07	7.51503e-10	-2.01239	-1.00891	2.01239	down	-2.57481	-1.36447	2.57481	down	0.406177	-0.602733	-0.958289	7267	Hs.368214	gb:NM_003316.1 /DB_XREF=gi:10835036 /GEN=TTC3 /FEA=FLmRNA /CNT=2 /TID=Hs.118174.0 /TIER=FL /STK=0 /UG=Hs.118174 /LL=7267 /DEF=Homo sapiens tetratricopeptide repeat domain 3 (TTC3), mRNA. /PROD=tetratricopeptide repeat domain 3 /FL=gb:D84295.1 gb:NM_003316.1
RANGRF	218526_s_at	1.02257e-07	7.66813e-10	-1.72253	-0.784533	1.72253	down	-2.00771	-1.00555	2.00771	down	0.420994	-0.363539	-0.584556	29098	Hs.408233	gb:NM_014185.1 /DB_XREF=gi:7661825 /GEN=HSPC165 /FEA=FLmRNA /CNT=103 /TID=Hs.13605.0 /TIER=FL+Stack /STK=51 /UG=Hs.13605 /LL=29098 /DEF=Homo sapiens HSPC165 protein (HSPC165), mRNA. /PROD=HSPC165 protein /FL=gb:NM_016492.1 gb:NM_014185.1 gb:AF161514.1 gb:AF151070.1 gb:AF265206.1 gb:AF168714.1
REPIN1	219041_s_at	1.02369e-07	7.69524e-10	-1.906	-0.93055	1.906	down	-1.9489	-0.96266	1.9489	down	0.404755	-0.525796	-0.557906	29803	Hs.647086	gb:NM_014374.1 /DB_XREF=gi:7656889 /GEN=AP4 /FEA=FLmRNA /CNT=64 /TID=Hs.90693.0 /TIER=FL+Stack /STK=18 /UG=Hs.90693 /LL=26997 /DEF=Homo sapiens zinc finger protein (AP4), mRNA. /PROD=zinc finger protein /FL=gb:BC000363.1 gb:NM_014374.1
ACER3	222688_at	1.02946e-07	7.75742e-10	1.78063	0.832389	1.78063	up	5.40442	2.43414	5.40442	up	-0.348451	0.483938	2.08569	55331	Hs.23862	gb:R12678 /DB_XREF=gi:765754 /DB_XREF=yf40c04.s1 /CLONE=IMAGE:129318 /FEA=FLmRNA /CNT=80 /TID=Hs.23862.0 /TIER=Stack /STK=12 /UG=Hs.23862 /LL=55331 /UG_GENE=FLJ11238 /UG_TITLE=hypothetical protein FLJ11238 /FL=gb:NM_018367.1
MAP2K6	205698_s_at	1.04368e-07	7.94094e-10	3.14791	1.6544	3.14791	up	6.46649	2.69298	6.46649	up	-0.471092	1.1833	2.22189	5608	Hs.463978	gb:NM_002758.1 /DB_XREF=gi:10835026 /GEN=MAP2K6 /FEA=FLmRNA /CNT=39 /TID=Hs.118825.0 /TIER=FL+Stack /STK=13 /UG=Hs.118825 /LL=5608 /DEF=Homo sapiens mitogen-activated protein kinase kinase 6 (MAP2K6), mRNA. /PROD=mitogen-activated protein kinase kinase 6 /FL=gb:U39065.1 gb:U49732.1 gb:D87905.1 gb:NM_002758.1 gb:U39656.1 gb:U39657.1
VNN1	205844_at	1.04368e-07	7.90662e-10	6.15731	2.6223	6.15731	up	21.0778	4.39765	21.0778	up	-0.830645	1.79165	3.56701	8876	Hs.12114	gb:NM_004666.1 /DB_XREF=gi:4759311 /GEN=VNN1 /FEA=FLmRNA /CNT=36 /TID=Hs.12114.0 /TIER=FL+Stack /STK=13 /UG=Hs.12114 /LL=8876 /DEF=Homo sapiens vanin 1 (VNN1), mRNA. /PROD=vanin 1 /FL=gb:U39664.1 gb:NM_004666.1
GNS	212334_at	1.04368e-07	7.90431e-10	1.72181	0.783923	1.72181	up	2.8032	1.48707	2.8032	up	-0.364363	0.419559	1.12271	2799	Hs.334534	gb:BE880245 /DB_XREF=gi:10329021 /DB_XREF=601490612F1 /CLONE=IMAGE:3893018 /FEA=EST /CNT=171 /TID=Hs.164036.0 /TIER=Stack /STK=62 /UG=Hs.164036 /UG_TITLE=Homo sapiens AKAP350C mRNA sequence, alternatively spliced
MCL1	214056_at	1.04368e-07	7.93379e-10	3.42037	1.77415	3.42037	up	2.35579	1.23621	2.35579	up	-0.350315	1.42384	0.885895	4170	Hs.632486	gb:BF981280 /DB_XREF=gi:12384092 /DB_XREF=602308517F1 /CLONE=IMAGE:4399756 /FEA=EST /CNT=58 /TID=Hs.86386.1 /TIER=ConsEnd /STK=0 /UG=Hs.86386 /LL=4170 /UG_GENE=MCL1 /UG_TITLE=myeloid cell leukemia sequence 1 (BCL2-related)
TPST2	204079_at	1.04607e-07	8.01649e-10	1.10017	0.137725	1.10017	up	2.53816	1.34378	2.53816	up	-0.131967	0.00575811	1.21182	8459	Hs.632768	gb:NM_003595.1 /DB_XREF=gi:4507666 /GEN=TPST2 /FEA=FLmRNA /CNT=72 /TID=Hs.26350.0 /TIER=FL+Stack /STK=26 /UG=Hs.26350 /LL=8459 /DEF=Homo sapiens tyrosylprotein sulfotransferase 2 (TPST2), mRNA. /PROD=tyrosylprotein sulfotransferase 2 /FL=gb:NM_003595.1 gb:BC001057.1 gb:AF061254.1 gb:AF049891.1 gb:AL136623.1
LCK	204891_s_at	1.04607e-07	8.00203e-10	-3.70231	-1.88842	3.70231	down	-6.25835	-2.64578	6.25835	down	0.522777	-1.36565	-2.12301	3932	Hs.470627	gb:NM_005356.1 /DB_XREF=gi:4885448 /GEN=LCK /FEA=FLmRNA /CNT=70 /TID=Hs.1765.0 /TIER=FL+Stack /STK=16 /UG=Hs.1765 /LL=3932 /DEF=Homo sapiens lymphocyte-specific protein tyrosine kinase (LCK), mRNA. /PROD=lymphocyte-specific protein tyrosine kinase /FL=gb:U07236.1 gb:NM_005356.1 gb:M36881.1
PSTPIP2	219938_s_at	1.04607e-07	8.00571e-10	2.97732	1.57401	2.97732	up	4.16384	2.05792	4.16384	up	-0.629792	0.94422	1.42812	9050	Hs.567384	gb:NM_024430.1 /DB_XREF=gi:13270468 /GEN=PSTPIP2 /FEA=FLmRNA /CNT=16 /TID=Hs.69149.0 /TIER=FL /STK=1 /UG=Hs.69149 /LL=9050 /DEF=Homo sapiens proline-serine-threonine phosphatase interacting protein 2 (PSTPIP2), mRNA. /PROD=proline-serine-threonine phosphatase interactingprotein 2 /FL=gb:NM_024430.1
	241216_at	1.04878e-07	8.0565e-10	1.927	0.946356	1.927	up	4.31298	2.10869	4.31298	up	-0.619088	0.327268	1.4896			gb:AI821782 /DB_XREF=gi:5440861 /DB_XREF=an47f07.x5 /CLONE=IMAGE:1701829 /FEA=EST /CNT=4 /TID=Hs.220587.0 /TIER=ConsEnd /STK=4 /UG=Hs.220587 /UG_TITLE=ESTs, Moderately similar to ALU5_HUMAN ALU SUBFAMILY SC SEQUENCE CONTAMINATION WARNING ENTRY (H.sapiens)
HDAC4	204225_at	1.05407e-07	8.13567e-10	2.07033	1.04986	2.07033	up	3.19061	1.67383	3.19061	up	-0.423431	0.626428	1.2504	9759	Hs.20516	gb:NM_006037.2 /DB_XREF=gi:13259519 /GEN=HDAC4 /FEA=FLmRNA /CNT=71 /TID=Hs.91400.0 /TIER=FL+Stack /STK=25 /UG=Hs.91400 /LL=9759 /DEF=Homo sapiens histone deacetylase 4 (HDAC4), mRNA. /PROD=histone deacetylase 4 /FL=gb:AF132607.1 gb:NM_006037.2
IL18RAP	207072_at	1.05407e-07	8.12954e-10	4.97708	2.3153	4.97708	up	5.75814	2.5256	5.75814	up	-0.461822	1.85348	2.06378	8807	Hs.158315	gb:NM_003853.1 /DB_XREF=gi:4504656 /GEN=IL18RAP /FEA=FLmRNA /CNT=6 /TID=Hs.158315.0 /TIER=FL /STK=0 /UG=Hs.158315 /LL=8807 /DEF=Homo sapiens interleukin 18 receptor accessory protein (IL18RAP), mRNA. /PROD=interleukin 18 receptor accessory protein /FL=gb:NM_003853.1 gb:AF077346.1
CWC27	1555495_a_at	1.0566e-07	8.17454e-10	-1.90039	-0.926296	1.90039	down	1.02303	0.0328447	1.02303	up	0.211428	-0.714868	0.244272	10283	Hs.371372	gb:BC012117.1 /DB_XREF=gi:15082404 /TID=Hs2.23557.2 /CNT=1 /FEA=FLmRNA /TIER=FL /STK=1 /LL=10283 /UG_GENE=SDCCAG10 /UG=Hs.23557 /DEF=Homo sapiens, Similar to serologically defined colon cancer antigen 10, clone MGC:20141 IMAGE:4552442, mRNA, complete cds. /PROD=Similar to serologically defined colon cancerantigen 10 /FL=gb:BC012117.1
AZI2	218043_s_at	1.0672e-07	8.27608e-10	2.38272	1.25261	2.38272	up	3.67379	1.87727	3.67379	up	-0.511986	0.740625	1.36528	64343	Hs.706676	gb:NM_022461.1 /DB_XREF=gi:11968002 /GEN=FLJ21939 /FEA=FLmRNA /CNT=150 /TID=Hs.164478.0 /TIER=FL+Stack /STK=21 /UG=Hs.164478 /LL=64343 /DEF=Homo sapiens hypothetical protein FLJ21939 similar to 5-azacytidine induced gene 2 (FLJ21939), mRNA. /PROD=hypothetical protein FLJ21939 similar to5-azacytidine induced gene 2 /FL=gb:NM_022461.1
SKAP2	204362_at	1.07913e-07	8.40679e-10	2.75632	1.46274	2.75632	up	3.03341	1.60094	3.03341	up	-0.354356	1.10839	1.24658	8935	Hs.200770	gb:NM_003930.1 /DB_XREF=gi:4506962 /GEN=SKAP-HOM /FEA=FLmRNA /CNT=67 /TID=Hs.52644.0 /TIER=FL+Stack /STK=12 /UG=Hs.52644 /LL=8935 /DEF=Homo sapiens SKAP55 homologue (SKAP-HOM), mRNA. /PROD=SKAP55 homologue /FL=gb:AF051323.1 gb:BC002893.1 gb:AB014486.1 gb:AF072166.1 gb:NM_003930.1
TNFAIP6	206025_s_at	1.07913e-07	8.40801e-10	3.70071	1.8878	3.70071	up	4.72918	2.24159	4.72918	up	-0.737179	1.15062	1.50441	7130	Hs.437322	gb:AW188198 /DB_XREF=gi:6462634 /DB_XREF=xj93f03.x1 /CLONE=IMAGE:2664797 /FEA=FLmRNA /CNT=25 /TID=Hs.29352.0 /TIER=Stack /STK=9 /UG=Hs.29352 /LL=7130 /UG_GENE=TNFAIP6 /UG_TITLE=tumor necrosis factor, alpha-induced protein 6 /FL=gb:NM_007115.1
PCMT1	210156_s_at	1.0918e-07	8.52676e-10	2.55511	1.35338	2.55511	up	3.8381	1.94039	3.8381	up	-0.535525	0.817858	1.40487	5110	Hs.279257	gb:D25547.1 /DB_XREF=gi:1332402 /FEA=FLmRNA /CNT=16 /TID=Hs.79137.1 /TIER=FL+Stack /STK=11 /UG=Hs.79137 /LL=5110 /UG_GENE=PCMT1 /DEF=Homo sapiens mRNA for PIMT isozyme I, complete cds. /PROD=PIMT isozyme I /FL=gb:D25547.1
PIK3IP1	221756_at	1.09747e-07	8.59105e-10	-2.10449	-1.07347	2.10449	down	-3.52161	-1.81624	3.52161	down	0.494051	-0.579422	-1.32218	113791	Hs.26670	gb:AL540260 /DB_XREF=gi:12870241 /DB_XREF=AL540260 /CLONE=CS0DF032YF03 (3 prime) /FEA=DNA_3 /CNT=138 /TID=Hs.26670.0 /TIER=Stack /STK=22 /UG=Hs.26670 /UG_TITLE=Human PAC clone RP3-515N1 from 22q11.2-q22
UGCG	221765_at	1.09902e-07	8.62334e-10	-1.07576	-0.105362	1.07576	down	7.52999	2.91265	7.52999	up	-0.169341	-0.274703	2.74331	7357	Hs.304249	gb:AI378044 /DB_XREF=gi:4187897 /DB_XREF=te67h09.x1 /CLONE=IMAGE:2091809 /FEA=EST /CNT=145 /TID=Hs.23703.0 /TIER=Stack /STK=21 /UG=Hs.23703 /UG_TITLE=ESTs
LOC105372392	227603_at	1.10432e-07	8.68506e-10	-1.27885	-0.354844	1.27885	down	-1.93384	-0.951467	1.93384	down	0.181239	-0.173605	-0.770228	105372392	Hs.640243	gb:N95430 /DB_XREF=gi:1267701 /DB_XREF=zb80d11.s1 /CLONE=IMAGE:309909 /FEA=EST /CNT=31 /TID=Hs.17674.0 /TIER=Stack /STK=24 /UG=Hs.17674 /UG_TITLE=ESTs
DDX24	200694_s_at	1.10751e-07	8.74171e-10	-1.74217	-0.800883	1.74217	down	-2.31805	-1.21291	2.31805	down	0.351353	-0.44953	-0.861558	57062	Hs.510328	gb:NM_020414.2 /DB_XREF=gi:13787212 /GEN=DDX24 /FEA=FLmRNA /CNT=398 /TID=Hs.155986.0 /TIER=FL+Stack /STK=124 /UG=Hs.155986 /LL=57062 /DEF=Homo sapiens DEADH (Asp-Glu-Ala-AspHis) box polypeptide 24 (DDX24), mRNA. /PROD=DEADH (Asp-Glu-Ala-AspHis) box polypeptide 24 /FL=gb:NM_020414.2 gb:AL136886.1 gb:AF214731.1
MYL12A///MYL12B	201318_s_at	1.10751e-07	8.76846e-10	1.72617	0.787576	1.72617	up	2.37553	1.24825	2.37553	up	-0.246369	0.541206	1.00188	10627///103910	Hs.190086///Hs.464472	gb:NM_006471.1 /DB_XREF=gi:5453739 /GEN=MLCB /FEA=FLmRNA /CNT=408 /TID=Hs.233936.0 /TIER=FL+Stack /STK=92 /UG=Hs.233936 /LL=10627 /DEF=Homo sapiens myosin, light polypeptide, regulatory, non-sarcomeric (20kD) (MLCB), mRNA. /PROD=myosin, light polypeptide, regulatory,non-sarcomeric (20kD) /FL=gb:NM_006471.1
FBXL16	227641_at	1.10751e-07	8.77096e-10	-2.23782	-1.16209	2.23782	down	-2.65457	-1.40848	2.65457	down	0.535971	-0.626122	-0.872507	146330	Hs.513244	gb:AI613010 /DB_XREF=gi:4622177 /DB_XREF=tx57h11.x1 /CLONE=IMAGE:2273733 /FEA=EST /CNT=41 /TID=Hs.290943.0 /TIER=Stack /STK=32 /UG=Hs.290943 /UG_TITLE=ESTs
WDFY3	212606_at	1.12129e-07	8.90057e-10	3.78335	1.91966	3.78335	up	2.86348	1.51777	2.86348	up	-0.648494	1.27117	0.869274	23001	Hs.480116	gb:AL536319 /DB_XREF=gi:12799812 /DB_XREF=AL536319 /CLONE=CS0DF015YG13 (3 prime) /FEA=mRNA /CNT=134 /TID=Hs.198135.0 /TIER=Stack /STK=18 /UG=Hs.198135 /LL=23001 /UG_GENE=KIAA0993 /UG_TITLE=KIAA0993 protein
G0S2	213524_s_at	1.12696e-07	8.96622e-10	3.22702	1.6902	3.22702	up	4.73152	2.2423	4.73152	up	-0.740369	0.949834	1.50193	50486	Hs.432132	gb:NM_015714.1 /DB_XREF=gi:7657103 /GEN=G0S2 /FEA=FLmRNA /CNT=62 /TID=Hs.95910.0 /TIER=FL+Stack /STK=9 /UG=Hs.95910 /LL=50486 /DEF=Homo sapiens putative lymphocyte G0G1 switch gene (G0S2), mRNA. /PROD=putative lymphocyte G0G1 switch gene /FL=gb:NM_015714.1
PEBP1	205353_s_at	1.13214e-07	9.05687e-10	-2.47426	-1.307	2.47426	down	-2.08339	-1.05893	2.08339	down	0.395882	-0.911114	-0.663052	5037	Hs.433863	gb:NM_002567.1 /DB_XREF=gi:4505620 /GEN=PBP /FEA=FLmRNA /CNT=29 /TID=Hs.80423.0 /TIER=FL /STK=0 /UG=Hs.80423 /LL=5037 /DEF=Homo sapiens prostatic binding protein (PBP), mRNA. /PROD=prostatic binding protein /FL=gb:D16111.1 gb:NM_002567.1
ZBED6	243648_at	1.13214e-07	9.05208e-10	-2.31801	-1.21289	2.31801	down	1.81405	0.859211	1.81405	up	0.11056	-1.10233	0.969771	100381270		gb:AA280627 /DB_XREF=gi:1924737 /DB_XREF=zt11c11.s1 /CLONE=IMAGE:712820 /FEA=EST /CNT=6 /TID=Hs.57846.0 /TIER=ConsEnd /STK=1 /UG=Hs.57846 /UG_TITLE=ESTs
	1564154_at	1.13214e-07	9.06951e-10	-1.86712	-0.900817	1.86712	down	-1.97369	-0.980894	1.97369	down	0.297398	-0.603419	-0.683496			gb:BC041466.1 /DB_XREF=gi:27370761 /TID=Hs2.434445.1 /CNT=1 /FEA=mRNA /TIER=ConsEnd /STK=0 /UG=Hs.434445 /UG_TITLE=Homo sapiens, clone IMAGE:5213841, mRNA /DEF=Homo sapiens, clone IMAGE:5213841, mRNA.
NIPAL3	225876_at	1.15208e-07	9.25032e-10	-2.71434	-1.4406	2.71434	down	-2.62453	-1.39206	2.62453	down	0.620972	-0.819629	-0.771085	57185	Hs.523442	gb:T84558 /DB_XREF=gi:712910 /DB_XREF=yd53d09.r1 /CLONE=IMAGE:111953 /FEA=mRNA /CNT=68 /TID=Hs.13804.1 /TIER=Stack /STK=11 /UG=Hs.13804 /LL=57185 /UG_GENE=DJ462O23.2 /UG_TITLE=hypothetical protein dJ462O23.2
USP32	244871_s_at	1.16407e-07	9.36789e-10	2.39606	1.26066	2.39606	up	1.52213	0.60609	1.52213	up	-0.37406	0.886604	0.23203	84669	Hs.132868	gb:AW268357 /DB_XREF=gi:6655387 /DB_XREF=xv50b11.x1 /CLONE=IMAGE:2816541 /FEA=EST /CNT=4 /TID=Hs.155787.0 /TIER=ConsEnd /STK=3 /UG=Hs.155787 /UG_TITLE=ESTs, Highly similar to AF155116 1 NY-REN-60 antigen (H.sapiens)
GATA3	209604_s_at	1.17237e-07	9.45613e-10	-2.46476	-1.30145	2.46476	down	-3.92171	-1.97148	3.92171	down	0.556078	-0.74537	-1.41541	2625	Hs.524134	gb:BC003070.1 /DB_XREF=gi:13111765 /FEA=FLmRNA /CNT=105 /TID=Hs.169946.0 /TIER=FL /STK=0 /UG=Hs.169946 /LL=2625 /UG_GENE=GATA3 /DEF=Homo sapiens, GATA-binding protein 3, clone MGC:2346, mRNA, complete cds. /PROD=GATA-binding protein 3 /FL=gb:NM_002051.1 gb:M69106.1 gb:BC003070.1
RGL4	235816_s_at	1.18383e-07	9.57022e-10	3.21814	1.68623	3.21814	up	7.6762	2.94039	7.6762	up	-0.455336	1.23089	2.48506	266747	Hs.658997	gb:AI867408 /DB_XREF=gi:5540424 /DB_XREF=wb71a07.x1 /CLONE=IMAGE:2311092 /FEA=EST /CNT=10 /TID=Hs.148656.0 /TIER=ConsEnd /STK=6 /UG=Hs.148656 /UG_TITLE=ESTs, Weakly similar to T12453 hypothetical protein DKFZp564D2123.1 (H.sapiens)
FBXL5	209004_s_at	1.18698e-07	9.61745e-10	2.0981	1.06908	2.0981	up	2.01476	1.01061	2.01476	up	-0.260038	0.809042	0.750572	26234	Hs.643433///Hs.714386	gb:AF142481.1 /DB_XREF=gi:7672733 /GEN=FLR1 /FEA=FLmRNA /CNT=205 /TID=Hs.5548.0 /TIER=FL+Stack /STK=65 /UG=Hs.5548 /LL=26234 /DEF=Homo sapiens F-box protein FLR1 (FLR1) mRNA, complete cds. /PROD=F-box protein FLR1 /FL=gb:AF142481.1 gb:AF199420.1 gb:AF157323.1
CXXC5	233955_x_at	1.18775e-07	9.64536e-10	-2.43341	-1.28298	2.43341	down	-2.88479	-1.52847	2.88479	down	0.532496	-0.750483	-0.995969	51523	Hs.744933	gb:AK001782.1 /DB_XREF=gi:7023268 /FEA=mRNA /CNT=2 /TID=Hs.15093.1 /TIER=ConsEnd /STK=0 /UG=Hs.15093 /LL=51523 /UG_GENE=HSPC195 /UG_TITLE=hypothetical protein /DEF=Homo sapiens cDNA FLJ10920 fis, clone OVARC1000384.
ATIC	208758_at	1.2178e-07	9.9117e-10	-1.82681	-0.869325	1.82681	down	-2.24474	-1.16655	2.24474	down	0.352491	-0.516834	-0.814059	471	Hs.90280	gb:D89976.1 /DB_XREF=gi:2317691 /FEA=FLmRNA /CNT=341 /TID=Hs.90280.0 /TIER=FL+Stack /STK=120 /UG=Hs.90280 /LL=471 /UG_GENE=ATIC /DEF=Homo sapiens mRNA for 5-aminoimidazole-4-carboxamide ribonucleotide transformylase, complete cds. /PROD=5-aminoimidazole-4-carboxamide ribonucleotidetransformylase /FL=gb:D82348.1 gb:U37436.1 gb:D89976.1 gb:NM_004044.1
SGK223	235085_at	1.22831e-07	1.00197e-09	-2.45075	-1.29322	2.45075	down	-3.99463	-1.99806	3.99463	down	0.619857	-0.673365	-1.3782	157285	Hs.657673	gb:BF739767 /DB_XREF=gi:12066443 /DB_XREF=hu59b11.x1 /CLONE=IMAGE:3174117 /FEA=EST /CNT=20 /TID=Hs.29068.0 /TIER=ConsEnd /STK=6 /UG=Hs.29068 /UG_TITLE=ESTs
NFATC2IP	217526_at	1.23235e-07	1.01069e-09	-1.28393	-0.36057	1.28393	down	-1.94194	-0.957502	1.94194	down	0.138675	-0.221895	-0.818827	84901	Hs.513470	gb:AI478300 /DB_XREF=gi:4371526 /DB_XREF=tm39e01.x1 /CLONE=IMAGE:2160504 /FEA=EST /CNT=20 /TID=Hs.192789.0 /TIER=ConsEnd /STK=4 /UG=Hs.192789 /UG_TITLE=ESTs, Weakly similar to ALU6_HUMAN ALU SUBFAMILY SP SEQUENCE CONTAMINATION WARNING ENTRY (H.sapiens)
ZNHIT6	218932_at	1.23235e-07	1.01202e-09	-1.84272	-0.881836	1.84272	down	-2.70164	-1.43383	2.70164	down	0.508326	-0.373511	-0.925508	54680	Hs.5111	gb:NM_017953.1 /DB_XREF=gi:8923654 /GEN=FLJ20729 /FEA=FLmRNA /CNT=59 /TID=Hs.5111.0 /TIER=FL+Stack /STK=17 /UG=Hs.5111 /LL=54680 /DEF=Homo sapiens hypothetical protein FLJ20729 (FLJ20729), mRNA. /PROD=hypothetical protein FLJ20729 /FL=gb:AL442074.1 gb:NM_017953.1
MCTP2	243109_at	1.23235e-07	1.00829e-09	3.00458	1.58716	3.00458	up	3.22971	1.69141	3.22971	up	-0.430753	1.15641	1.26065	55784	Hs.33368	gb:AA748418 /DB_XREF=gi:2788376 /DB_XREF=ny01a01.s1 /CLONE=IMAGE:1270440 /FEA=EST /CNT=5 /TID=Hs.164577.0 /TIER=ConsEnd /STK=3 /UG=Hs.164577 /UG_TITLE=ESTs
SSBP2	203787_at	1.24352e-07	1.02574e-09	-1.66217	-0.73307	1.66217	down	-2.53188	-1.34021	2.53188	down	0.375912	-0.357158	-0.964296	23635	Hs.102735	gb:NM_012446.1 /DB_XREF=gi:7106422 /GEN=SSBP2 /FEA=FLmRNA /CNT=112 /TID=Hs.169833.0 /TIER=FL+Stack /STK=43 /UG=Hs.169833 /LL=23635 /DEF=Homo sapiens single-stranded-DNA-binding protein (SSBP2), mRNA. /PROD=single-stranded-DNA-binding protein /FL=gb:AL080076.1 gb:AF161465.1 gb:NM_012446.1
FLOT1	208749_x_at	1.24352e-07	1.02569e-09	1.64617	0.71911	1.64617	up	2.93565	1.55368	2.93565	up	-0.493872	0.225237	1.05981	10211	Hs.179986	gb:AF085357.1 /DB_XREF=gi:5114048 /FEA=FLmRNA /CNT=291 /TID=Hs.179986.0 /TIER=FL+Stack /STK=84 /UG=Hs.179986 /LL=10211 /UG_GENE=FLOT1 /DEF=Homo sapiens flotillin mRNA, complete cds. /PROD=flotillin /FL=gb:BC001146.1 gb:AF089750.2 gb:NM_005803.2 gb:AF085357.1
SPTLC2	203127_s_at	1.25343e-07	1.03621e-09	3.7357	1.90138	3.7357	up	2.89917	1.53564	2.89917	up	-0.292854	1.60853	1.24279	9517	Hs.435661	gb:BC005123.1 /DB_XREF=gi:13477298 /FEA=FLmRNA /CNT=108 /TID=Hs.59403.0 /TIER=FL /STK=0 /UG=Hs.59403 /LL=9517 /UG_GENE=SPTLC2 /DEF=Homo sapiens, serine palmitoyltransferase, long chain base subunit 2, clone MGC:10362, mRNA, complete cds. /PROD=serine palmitoyltransferase, long chain basesubunit 2 /FL=gb:BC005123.1 gb:NM_004863.1 gb:AB011098.1
CTSD	200766_at	1.25566e-07	1.04035e-09	-1.13776	-0.1862	1.13776	down	2.96206	1.5666	2.96206	up	-0.0289778	-0.215178	1.53762	1509	Hs.654447	gb:NM_001909.1 /DB_XREF=gi:4503142 /GEN=CTSD /FEA=FLmRNA /CNT=460 /TID=Hs.79572.0 /TIER=FL+Stack /STK=151 /UG=Hs.79572 /LL=1509 /DEF=Homo sapiens cathepsin D (lysosomal aspartyl protease) (CTSD), mRNA. /PROD=cathepsin D (lysosomal aspartyl protease) /FL=gb:NM_001909.1 gb:M11233.1
ID3	207826_s_at	1.25587e-07	1.04282e-09	-6.05578	-2.59831	6.05578	down	-9.55415	-3.25613	9.55415	down	0.639762	-1.95855	-2.61637	3399	Hs.76884	gb:NM_002167.1 /DB_XREF=gi:10835060 /GEN=ID3 /FEA=FLmRNA /CNT=3 /TID=Hs.76884.0 /TIER=FL /STK=0 /UG=Hs.76884 /LL=3399 /DEF=Homo sapiens inhibitor of DNA binding 3, dominant negative helix-loop-helix protein (ID3), mRNA. /PROD=inhibitor of DNA binding 3, dominant negativehelix-loop-helix protein /FL=gb:NM_002167.1
LEF1	221558_s_at	1.26749e-07	1.05479e-09	-3.76907	-1.91421	3.76907	down	-5.139	-2.36149	5.139	down	0.774059	-1.14015	-1.58743	51176	Hs.743478	gb:AF288571.1 /DB_XREF=gi:9858157 /GEN=LEF1 /FEA=FLmRNA /CNT=138 /TID=Hs.44865.1 /TIER=FL /STK=0 /UG=Hs.44865 /LL=51176 /DEF=Homo sapiens lymphoid enhancer factor-1 (LEF1) mRNA, complete cds. /PROD=lymphoid enhancer factor-1 /FL=gb:AF288571.1 gb:NM_016269.1 gb:AF198532.1
CA4	206209_s_at	1.26792e-07	1.05767e-09	3.51483	1.81346	3.51483	up	8.18298	3.03263	8.18298	up	-0.904441	0.909016	2.12819	762	Hs.89485	gb:NM_000717.2 /DB_XREF=gi:9951925 /GEN=CA4 /FEA=FLmRNA /CNT=16 /TID=Hs.89485.0 /TIER=FL+Stack /STK=9 /UG=Hs.89485 /LL=762 /DEF=Homo sapiens carbonic anhydrase IV (CA4), mRNA. /PROD=carbonic anhydrase IV precursor /FL=gb:NM_000717.2 gb:M83670.1
	230999_at	1.26792e-07	1.05979e-09	2.09116	1.06431	2.09116	up	4.2387	2.08362	4.2387	up	-0.487009	0.577296	1.59661			gb:AI743903 /DB_XREF=gi:5112191 /DB_XREF=wg54c12.x1 /CLONE=IMAGE:2368918 /FEA=EST /CNT=10 /TID=Hs.22590.0 /TIER=Stack /STK=10 /UG=Hs.22590 /UG_TITLE=ESTs
RIOK3	202130_at	1.27989e-07	1.07214e-09	2.73278	1.45037	2.73278	up	4.07268	2.02598	4.07268	up	-0.675188	0.775182	1.35079	8780	Hs.728452	gb:AA725102 /DB_XREF=gi:2742809 /DB_XREF=ai08h05.s1 /CLONE=1342233 /FEA=FLmRNA /CNT=160 /TID=Hs.209061.0 /TIER=Stack /STK=39 /UG=Hs.209061 /LL=8780 /UG_GENE=SUDD /UG_TITLE=sudD (suppressor of bimD6, Aspergillus nidulans) homolog /FL=gb:NM_003831.1 gb:AF013591.1
ACER3	222687_s_at	1.28748e-07	1.08085e-09	1.6123	0.689121	1.6123	up	4.43125	2.14771	4.43125	up	-0.411202	0.277919	1.73651	55331	Hs.23862	gb:R12678 /DB_XREF=gi:765754 /DB_XREF=yf40c04.s1 /CLONE=IMAGE:129318 /FEA=FLmRNA /CNT=80 /TID=Hs.23862.0 /TIER=Stack /STK=12 /UG=Hs.23862 /LL=55331 /UG_GENE=FLJ11238 /UG_TITLE=hypothetical protein FLJ11238 /FL=gb:NM_018367.1
CCT3	200910_at	1.30573e-07	1.10095e-09	-1.83637	-0.876854	1.83637	down	-1.72856	-0.789567	1.72856	down	0.413553	-0.463301	-0.376014	7203	Hs.491494	gb:NM_005998.1 /DB_XREF=gi:5174726 /GEN=CCT3 /FEA=FLmRNA /CNT=496 /TID=Hs.1708.0 /TIER=FL /STK=0 /UG=Hs.1708 /LL=7203 /DEF=Homo sapiens chaperonin containing TCP1, subunit 3 (gamma) (CCT3), mRNA. /PROD=chaperonin containing TCP1, subunit 3 (gamma) /FL=gb:NM_005998.1
LIN7A	206440_at	1.30573e-07	1.09934e-09	2.3241	1.21667	2.3241	up	5.3753	2.42634	5.3753	up	-0.375128	0.841546	2.05122	8825	Hs.144333	gb:NM_004664.1 /DB_XREF=gi:4759305 /GEN=VELI1 /FEA=FLmRNA /CNT=19 /TID=Hs.178215.0 /TIER=FL /STK=3 /UG=Hs.178215 /LL=8825 /DEF=Homo sapiens Vertebrate LIN7 homolog 1, Tax interaction protein 33 (VELI1), mRNA. /PROD=Vertebrate LIN7 homolog 1, Tax interactionprotein 33 /FL=gb:AF087693.1 gb:NM_004664.1 gb:AF173081.1
RIOK3	202129_s_at	1.30768e-07	1.10737e-09	5.36331	2.42312	5.36331	up	3.18939	1.67328	3.18939	up	-0.806087	1.61704	0.867193	8780	Hs.728452	gb:AW006290 /DB_XREF=gi:5855068 /DB_XREF=wq69f11.x1 /CLONE=IMAGE:2476557 /FEA=FLmRNA /CNT=160 /TID=Hs.209061.0 /TIER=Stack /STK=15 /UG=Hs.209061 /LL=8780 /UG_GENE=SUDD /UG_TITLE=sudD (suppressor of bimD6, Aspergillus nidulans) homolog /FL=gb:NM_003831.1 gb:AF013591.1
STRBP	229513_at	1.30768e-07	1.10563e-09	-2.14181	-1.09883	2.14181	down	-3.3529	-1.74541	3.3529	down	0.465743	-0.633085	-1.27967	55342	Hs.694157	gb:AK025613.1 /DB_XREF=gi:10438184 /FEA=mRNA /CNT=14 /TID=Hs.287687.0 /TIER=Stack /STK=10 /UG=Hs.287687 /UG_TITLE=Homo sapiens cDNA: FLJ21960 fis, clone HEP05517 /DEF=Homo sapiens cDNA: FLJ21960 fis, clone HEP05517.
DACH1	228915_at	1.30821e-07	1.11021e-09	2.79406	1.48236	2.79406	up	11.0285	3.46316	11.0285	up	-0.569739	0.912624	2.89342	1602	Hs.129452	gb:AI650353 /DB_XREF=gi:4734332 /DB_XREF=wa18h01.x1 /CLONE=IMAGE:2298481 /FEA=EST /CNT=16 /TID=Hs.30098.0 /TIER=Stack /STK=11 /UG=Hs.30098 /UG_TITLE=ESTs
SRPK1	202199_s_at	1.31486e-07	1.12066e-09	2.12108	1.0848	2.12108	up	2.02981	1.02135	2.02981	up	-0.616145	0.468655	0.405201	6732	Hs.443861	gb:AW082913 /DB_XREF=gi:6038065 /DB_XREF=xc04c12.x1 /CLONE=IMAGE:2583286 /FEA=FLmRNA /CNT=179 /TID=Hs.75761.0 /TIER=Stack /STK=8 /UG=Hs.75761 /LL=6732 /UG_GENE=SRPK1 /UG_TITLE=SFRS protein kinase 1 /FL=gb:NM_003137.1 gb:U09564.1
SDCCAG3	218427_at	1.31486e-07	1.11872e-09	-2.17721	-1.12248	2.17721	down	-1.62904	-0.704024	1.62904	down	0.356436	-0.766047	-0.347588	10807	Hs.94300	gb:NM_006643.1 /DB_XREF=gi:10281331 /GEN=SDCCAG3 /FEA=FLmRNA /CNT=112 /TID=Hs.94300.0 /TIER=FL+Stack /STK=78 /UG=Hs.94300 /LL=10807 /DEF=Homo sapiens serologically defined colon cancer antigen 3 (SDCCAG3), mRNA. /PROD=serologically defined colon cancer antigen 3 /FL=gb:NM_006643.1
ASAP1	224790_at	1.33202e-07	1.13773e-09	3.604	1.8496	3.604	up	1.58644	0.665796	1.58644	up	-0.567166	1.28243	0.0986301	50807	Hs.655552	gb:AI023398 /DB_XREF=gi:3239804 /DB_XREF=ow71e05.x1 /CLONE=IMAGE:1652288 /FEA=mRNA /CNT=168 /TID=Hs.10669.1 /TIER=Stack /STK=10 /UG=Hs.10669 /LL=50807 /UG_GENE=KIAA1249 /UG_TITLE=KIAA1249 protein
MS4A6A	223922_x_at	1.35797e-07	1.16238e-09	2.0698	1.04949	2.0698	up	2.90998	1.54101	2.90998	up	-0.402395	0.647099	1.13862	64231	Hs.523702	gb:AB013104.1 /DB_XREF=gi:11559215 /GEN=MS4A6 /FEA=FLmRNA /CNT=6 /TID=Hs.17914.2 /TIER=FL /STK=0 /UG=Hs.17914 /LL=64231 /DEF=Homo sapiens mRNA for MS4A6, complete cds. /PROD=MS4A6 /FL=gb:AB013104.1
FOXO3	204131_s_at	1.37528e-07	1.17971e-09	2.6711	1.41743	2.6711	up	1.88482	0.914425	1.88482	up	-0.481142	0.936292	0.433283	2309	Hs.220950	gb:N25732 /DB_XREF=gi:1140080 /DB_XREF=yx83c03.s1 /CLONE=IMAGE:268324 /FEA=FLmRNA /CNT=84 /TID=Hs.14845.0 /TIER=Stack /STK=30 /UG=Hs.14845 /LL=2309 /UG_GENE=FOXO3A /UG_TITLE=forkhead box O3A /FL=gb:AF032886.1 gb:NM_001455.1
AGFG1	213926_s_at	1.37652e-07	1.18581e-09	1.13155	0.178298	1.13155	up	5.26464	2.39634	5.26464	up	-0.197926	-0.0196283	2.19841	3267	Hs.352962	gb:AI742626 /DB_XREF=gi:5110914 /DB_XREF=wg44c03.x1 /CLONE=IMAGE:2367940 /FEA=EST /CNT=44 /TID=Hs.171545.1 /TIER=ConsEnd /STK=0 /UG=Hs.171545 /LL=3267 /UG_GENE=HRB /UG_TITLE=HIV-1 Rev binding protein
	222303_at	1.37652e-07	1.18339e-09	2.98452	1.5775	2.98452	up	3.00459	1.58717	3.00459	up	-0.423294	1.1542	1.16387			gb:AV700891 /DB_XREF=gi:10302862 /DB_XREF=AV700891 /CLONE=GKCBQD03 /FEA=EST /CNT=7 /TID=Hs.292477.0 /TIER=ConsEnd /STK=0 /UG=Hs.292477 /UG_TITLE=ESTs
LINC01420	225029_at	1.37977e-07	1.19114e-09	-1.70253	-0.76768	1.70253	down	-2.17439	-1.12061	2.17439	down	0.39105	-0.37663	-0.729561	550643	Hs.355559	gb:BE621082 /DB_XREF=gi:9892020 /DB_XREF=601493691F1 /CLONE=IMAGE:3895703 /FEA=EST /CNT=160 /TID=Hs.74111.2 /TIER=Stack /STK=53 /UG=Hs.74111 /LL=22913 /UG_GENE=RALY /UG_TITLE=RNA-binding protein (autoantigenic)
TXN	208864_s_at	1.38365e-07	1.19954e-09	1.78044	0.832231	1.78044	up	4.88475	2.28828	4.88475	up	-0.412457	0.419774	1.87583	7295	Hs.435136	gb:AF313911.1 /DB_XREF=gi:11345419 /FEA=FLmRNA /CNT=320 /TID=Hs.76136.0 /TIER=FL /STK=0 /UG=Hs.76136 /LL=7295 /UG_GENE=TXN /DEF=Homo sapiens thioredoxin mRNA, complete cds. /PROD=thioredoxin /FL=gb:NM_003329.1 gb:J04026.1 gb:AF313911.1 gb:AF276919.1 gb:AY004872.1 gb:BC003377.1
PCNX	213173_at	1.38365e-07	1.19859e-09	3.03573	1.60204	3.03573	up	2.71065	1.43864	2.71065	up	-0.340291	1.26175	1.09835	22990	Hs.446559	gb:AI815033 /DB_XREF=gi:5426248 /DB_XREF=wk70c01.x1 /CLONE=IMAGE:2420736 /FEA=mRNA /CNT=52 /TID=Hs.55947.0 /TIER=ConsEnd /STK=2 /UG=Hs.55947 /LL=23226 /UG_GENE=KIAA0805 /UG_TITLE=KIAA0805 protein
SCAMP1	212417_at	1.38582e-07	1.20396e-09	-2.4215	-1.2759	2.4215	down	1.24759	0.319145	1.24759	up	0.0817282	-1.19417	0.400873	9522	Hs.482587	gb:BF058944 /DB_XREF=gi:10812840 /DB_XREF=7k36c05.x1 /CLONE=IMAGE:3477489 /FEA=mRNA /CNT=146 /TID=Hs.31218.1 /TIER=Stack /STK=9 /UG=Hs.31218 /LL=9522 /UG_GENE=SCAMP1 /UG_TITLE=secretory carrier membrane protein 1
EXOC6	226259_at	1.40615e-07	1.2242e-09	1.95412	0.966517	1.95412	up	4.31817	2.11042	4.31817	up	-0.366212	0.600305	1.74421	54536	Hs.655657	gb:AL137438.1 /DB_XREF=gi:6807997 /GEN=DKFZp761I2124 /FEA=mRNA /CNT=55 /TID=Hs.110454.0 /TIER=Stack /STK=24 /UG=Hs.110454 /LL=54536 /DEF=Homo sapiens mRNA; cDNA DKFZp761I2124 (from clone DKFZp761I2124); partial cds. /PROD=hypothetical protein
TNFAIP6	206026_s_at	1.40845e-07	1.22877e-09	4.18802	2.06627	4.18802	up	5.57264	2.47836	5.57264	up	-1.08957	0.976696	1.38879	7130	Hs.437322	gb:NM_007115.1 /DB_XREF=gi:6005905 /GEN=TNFAIP6 /FEA=FLmRNA /CNT=25 /TID=Hs.29352.0 /TIER=FL /STK=0 /UG=Hs.29352 /LL=7130 /DEF=Homo sapiens tumor necrosis factor, alpha-induced protein 6 (TNFAIP6), mRNA. /PROD=tumor necrosis factor, alpha-induced protein 6 /FL=gb:NM_007115.1
NMT2	205006_s_at	1.4289e-07	1.24922e-09	-3.05204	-1.60977	3.05204	down	-3.5066	-1.81007	3.5066	down	0.396117	-1.21366	-1.41396	9397	Hs.60339	gb:NM_004808.1 /DB_XREF=gi:4758815 /GEN=NMT2 /FEA=FLmRNA /CNT=40 /TID=Hs.122647.0 /TIER=FL /STK=1 /UG=Hs.122647 /LL=9397 /DEF=Homo sapiens N-myristoyltransferase 2 (NMT2), mRNA. /PROD=glycylpeptide N-tetradecanoyltransferase 2 /FL=gb:NM_004808.1 gb:AF043325.1
ATP6V0E2	213587_s_at	1.42926e-07	1.25477e-09	-2.03783	-1.02704	2.03783	down	-2.5631	-1.35789	2.5631	down	0.500451	-0.526585	-0.857437	155066	Hs.556998	gb:AI884867 /DB_XREF=gi:5590031 /DB_XREF=wl85g03.x1 /CLONE=IMAGE:2431732 /FEA=EST /CNT=26 /TID=Hs.91379.1 /TIER=Stack /STK=26 /UG=Hs.91379 /LL=6154 /UG_GENE=RPL26 /UG_TITLE=ribosomal protein L26
ITGA7	216331_at	1.42926e-07	1.25404e-09	1.74098	0.799898	1.74098	up	27.3444	4.77317	27.3444	up	-0.550356	0.249542	4.22282	3679	Hs.524484	gb:AK022548.1 /DB_XREF=gi:10434001 /FEA=mRNA /CNT=1 /TID=Hs.74369.1 /TIER=ConsEnd /STK=0 /UG=Hs.74369 /LL=3679 /UG_GENE=ITGA7 /UG_TITLE=integrin, alpha 7 /DEF=Homo sapiens cDNA FLJ12486 fis, clone NT2RM2000566, highly similar to Homo sapiens integrin alpha-7 mRNA.
	242117_at	1.43063e-07	1.25859e-09	3.30227	1.72346	3.30227	up	1.35943	0.443003	1.35943	up	-0.433706	1.28975	0.00929682		Hs.624078	gb:AI692401 /DB_XREF=gi:4969752 /DB_XREF=wd69b05.x1 /CLONE=IMAGE:2336817 /FEA=EST /CNT=8 /TID=Hs.187402.0 /TIER=ConsEnd /STK=0 /UG=Hs.187402 /UG_TITLE=ESTs
RBMS1	215127_s_at	1.43848e-07	1.26985e-09	1.89302	0.920691	1.89302	up	2.42853	1.28009	2.42853	up	-0.452086	0.468605	0.828	5937	Hs.470412	gb:AL517946 /DB_XREF=gi:12781439 /DB_XREF=AL517946 /CLONE=CS0DA004YB11 (3 prime) /FEA=mRNA /CNT=6 /TID=Hs.241567.3 /TIER=ConsEnd /STK=1 /UG=Hs.241567 /LL=5937 /UG_GENE=RBMS1 /UG_TITLE=RNA binding motif, single stranded interacting protein 1
DCAF6	217908_s_at	1.43848e-07	1.27076e-09	1.55109	0.63328	1.55109	up	1.8654	0.899482	1.8654	up	-0.39953	0.233751	0.499953	55827	Hs.435741	gb:NM_018442.1 /DB_XREF=gi:8923955 /GEN=PC326 /FEA=FLmRNA /CNT=190 /TID=Hs.279882.0 /TIER=FL+Stack /STK=64 /UG=Hs.279882 /LL=55827 /DEF=Homo sapiens PC326 protein (PC326), mRNA. /PROD=PC326 protein /FL=gb:NM_018442.1 gb:AL136738.1 gb:AF150734.1
SIDT1	219734_at	1.44069e-07	1.27534e-09	-2.24107	-1.16419	2.24107	down	-3.2764	-1.71211	3.2764	down	0.475922	-0.688269	-1.23619	54847	Hs.591291	gb:NM_017699.1 /DB_XREF=gi:8923170 /GEN=FLJ20174 /FEA=FLmRNA /CNT=20 /TID=Hs.114556.0 /TIER=FL /STK=0 /UG=Hs.114556 /LL=54847 /DEF=Homo sapiens hypothetical protein FLJ20174 (FLJ20174), mRNA. /PROD=hypothetical protein FLJ20174 /FL=gb:NM_017699.1
TRAC	209671_x_at	1.45088e-07	1.28835e-09	-2.17788	-1.12293	2.17788	down	-5.92979	-2.56798	5.92979	down	0.400011	-0.722916	-2.16797	28755	Hs.74647	gb:M12423.1 /DB_XREF=gi:338738 /GEN=TCRA /FEA=FLmRNA /CNT=83 /TID=Hs.74647.1 /TIER=FL /STK=0 /UG=Hs.74647 /LL=6955 /UG_TITLE=Human T-cell receptor active alpha-chain mRNA from JM cell line, complete cds /DEF=Human T-cell receptor active alpha-chain mRNA, complete cds, from Jurkat T-cell line. /FL=gb:M12959.1 gb:M12423.1
SLC40A1	223044_at	1.45088e-07	1.28967e-09	2.42	1.27501	2.42	up	3.84839	1.94426	3.84839	up	-0.480254	0.794752	1.464	30061	Hs.643005	gb:AL136944.1 /DB_XREF=gi:12053382 /GEN=DKFZp586J0624 /FEA=FLmRNA /CNT=341 /TID=Hs.5944.0 /TIER=FL+Stack /STK=188 /UG=Hs.5944 /LL=30061 /DEF=Homo sapiens mRNA; cDNA DKFZp586J0624 (from clone DKFZp586J0624); complete cds. /PROD=hypothetical protein /FL=gb:AF215636.1 gb:NM_014585.1 gb:AF231121.1 gb:AF226614.1 gb:AL136944.1
VCL	200931_s_at	1.45471e-07	1.29574e-09	1.92748	0.946716	1.92748	up	2.02309	1.01656	2.02309	up	-0.31318	0.633536	0.703378	7414	Hs.643896	gb:NM_014000.1 /DB_XREF=gi:7669549 /GEN=VCL /FEA=FLmRNA /CNT=341 /TID=Hs.75350.0 /TIER=FL+Stack /STK=53 /UG=Hs.75350 /LL=7414 /DEF=Homo sapiens vinculin (VCL), transcript variant meta-VCL, mRNA. /PROD=VCL isoform meta-VCL /FL=gb:NM_014000.1
HLA-DRB1///HLA-DRB3///HLA-DRB4///LOC105369230	215193_x_at	1.45992e-07	1.30304e-09	-1.38542	-0.470326	1.38542	down	-4.26834	-2.09368	4.26834	down	0.223019	-0.247307	-1.87066	3123///3125///3126///105369230	Hs.534322///Hs.696211	gb:AJ297586.1 /DB_XREF=gi:10185079 /GEN=HLA-DRB1 /FEA=mRNA /CNT=7 /TID=Hs.279930.1 /TIER=ConsEnd /STK=0 /UG=Hs.279930 /LL=3125 /DEF=Homo sapiens mRNA for MHC class II antigen (HLA-DRB1 gene), DRB1*0402 allele. /PROD=MHC class II antigen
EIF3C///EIF3CL	210949_s_at	1.46254e-07	1.30806e-09	-1.73381	-0.793944	1.73381	down	-2.4368	-1.28499	2.4368	down	0.32271	-0.471234	-0.962276	8663///728689	Hs.535464///Hs.567374	gb:BC000533.1 /DB_XREF=gi:12653522 /FEA=FLmRNA /CNT=4 /TID=Hs.4835.1 /TIER=FL /STK=0 /UG=Hs.4835 /LL=8663 /UG_GENE=EIF3S8 /DEF=Homo sapiens, Similar to eukaryotic translation initiation factor 3, subunit 8 (110kD), clone MGC:8693, mRNA, complete cds. /PROD=Similar to eukaryotic translation initiationfactor 3, subunit 8 (110kD) /FL=gb:BC000533.1
ZNF106	217781_s_at	1.49055e-07	1.33584e-09	1.69762	0.763516	1.69762	up	2.50181	1.32297	2.50181	up	-0.386098	0.377417	0.936873	64397	Hs.511143	gb:NM_022473.1 /DB_XREF=gi:11968022 /GEN=ZFP106 /FEA=FLmRNA /CNT=318 /TID=Hs.15220.0 /TIER=FL+Stack /STK=72 /UG=Hs.15220 /LL=64397 /DEF=Homo sapiens zinc finger protein 106 (ZFP106), mRNA. /PROD=zinc finger protein 106 /FL=gb:AF205632.1 gb:NM_022473.1
USP11	208723_at	1.49971e-07	1.34679e-09	-1.94011	-0.956138	1.94011	down	-2.20382	-1.14	2.20382	down	0.317886	-0.638252	-0.822119	8237	Hs.171501	gb:BC000350.1 /DB_XREF=gi:12653164 /FEA=FLmRNA /CNT=474 /TID=Hs.171501.0 /TIER=FL+Stack /STK=123 /UG=Hs.171501 /LL=8237 /UG_GENE=USP11 /DEF=Homo sapiens, ubiquitin specific protease 11, clone MGC:8620, mRNA, complete cds. /PROD=ubiquitin specific protease 11 /FL=gb:BC000350.1 gb:NM_004651.1 gb:U44839.1
ALOX5AP	204174_at	1.50445e-07	1.35645e-09	2.74063	1.45451	2.74063	up	2.73453	1.45129	2.73453	up	-0.364785	1.08972	1.08651	241	Hs.507658	gb:NM_001629.1 /DB_XREF=gi:4502058 /GEN=ALOX5AP /FEA=FLmRNA /CNT=88 /TID=Hs.100194.0 /TIER=FL /STK=0 /UG=Hs.100194 /LL=241 /DEF=Homo sapiens arachidonate 5-lipoxygenase-activating protein (ALOX5AP), mRNA. /PROD=arachidonate 5-lipoxygenase-activating protein /FL=gb:NM_001629.1
FBXO9	210638_s_at	1.50445e-07	1.35655e-09	1.93739	0.954111	1.93739	up	2.31908	1.21355	2.31908	up	-0.615119	0.338992	0.598431	26268	Hs.216653	gb:AF176704.1 /DB_XREF=gi:6103646 /FEA=FLmRNA /CNT=3 /TID=Hs.11050.1 /TIER=FL /STK=0 /UG=Hs.11050 /LL=26268 /UG_GENE=FBXO9 /DEF=Homo sapiens F-box protein FBX9 mRNA, complete cds. /PROD=F-box protein FBX9 /FL=gb:AF176704.1
IMPDH2	201892_s_at	1.5169e-07	1.37229e-09	-2.35863	-1.23795	2.35863	down	-2.58233	-1.36867	2.58233	down	0.463111	-0.774839	-0.90556	3615	Hs.654400	gb:NM_000884.1 /DB_XREF=gi:4504688 /GEN=IMPDH2 /FEA=FLmRNA /CNT=215 /TID=Hs.75432.0 /TIER=FL+Stack /STK=107 /UG=Hs.75432 /LL=3615 /DEF=Homo sapiens IMP (inosine monophosphate) dehydrogenase 2 (IMPDH2), mRNA. /PROD=IMP (inosine monophosphate) dehydrogenase 2 /FL=gb:NM_000884.1 gb:J04208.1
RAB31	217764_s_at	1.5169e-07	1.37333e-09	2.22321	1.15265	2.22321	up	3.68228	1.8806	3.68228	up	-0.348198	0.804448	1.5324	11031	Hs.744887	gb:AF183421.1 /DB_XREF=gi:9963780 /FEA=FLmRNA /CNT=424 /TID=Hs.223025.0 /TIER=FL+Stack /STK=87 /UG=Hs.223025 /LL=11031 /UG_GENE=RAB31 /DEF=Homo sapiens small GTP-binding protein rab22b mRNA, complete cds. /PROD=small GTP-binding protein rab22b /FL=gb:NM_006868.1 gb:U59877.1 gb:U57091.1 gb:BC001148.1 gb:AF183421.1 gb:AF234995.1
	230082_at	1.52993e-07	1.38792e-09	2.24169	1.16458	2.24169	up	1.78202	0.833512	1.78202	up	-0.408809	0.755775	0.424703		Hs.659695	gb:AW137053 /DB_XREF=gi:6141186 /DB_XREF=UI-H-BI1-acu-h-04-0-UI.s1 /CLONE=IMAGE:2715870 /FEA=EST /CNT=15 /TID=Hs.49576.0 /TIER=Stack /STK=13 /UG=Hs.49576 /UG_TITLE=ESTs
RAB27A	209515_s_at	1.54424e-07	1.40373e-09	2.27227	1.18413	2.27227	up	3.23017	1.69161	3.23017	up	-0.371376	0.812756	1.32023	5873	Hs.654978	gb:U38654.3 /DB_XREF=gi:4887230 /FEA=FLmRNA /CNT=83 /TID=Hs.50477.1 /TIER=FL+Stack /STK=8 /UG=Hs.50477 /LL=5873 /UG_GENE=RAB27A /DEF=Homo sapiens Rab27a mRNA, complete cds. /PROD=Rab27a /FL=gb:U38654.3
PLSCR1	202446_s_at	1.56234e-07	1.42746e-09	4.30555	2.1062	4.30555	up	4.77343	2.25503	4.77343	up	-0.794412	1.31179	1.46062	5359	Hs.130759	gb:AI825926 /DB_XREF=gi:5446597 /DB_XREF=to92d05.x1 /CLONE=IMAGE:2185737 /FEA=FLmRNA /CNT=275 /TID=Hs.198282.0 /TIER=Stack /STK=14 /UG=Hs.198282 /LL=5359 /UG_GENE=PLSCR1 /UG_TITLE=phospholipid scramblase 1 /FL=gb:AB006746.1 gb:NM_021105.1 gb:AF098642.1
SLC25A37	222529_at	1.56234e-07	1.42517e-09	1.75828	0.814166	1.75828	up	2.25847	1.17535	2.25847	up	-0.502213	0.311953	0.673133	51312	Hs.726050	gb:BG251467 /DB_XREF=gi:12761283 /DB_XREF=602363924F1 /CLONE=IMAGE:4472308 /FEA=FLmRNA /CNT=141 /TID=Hs.300496.0 /TIER=Stack /STK=15 /UG=Hs.300496 /LL=51312 /UG_GENE=LOC51312 /UG_TITLE=mitochondrial solute carrier /FL=gb:AF116630.1 gb:NM_018579.1 gb:AF155660.1
ATP11B	1564063_a_at	1.56234e-07	1.42875e-09	1.83951	0.879322	1.83951	up	5.00778	2.32417	5.00778	up	-0.505425	0.373897	1.81875	23200	Hs.478429	gb:AK093727.1 /DB_XREF=gi:21752654 /TID=Hs2.75478.5 /CNT=1 /FEA=mRNA /TIER=ConsEnd /STK=0 /LL=23200 /UG_GENE=ATP11B /UG=Hs.75478 /UG_TITLE=ATPase, Class VI, type 11B /DEF=Homo sapiens cDNA FLJ36408 fis, clone THYMU2010094, highly similar to POTENTIAL PHOSPHOLIPID-TRANSPORTING ATPASE IR (EC 3.6.1.-).
AQP3	39248_at	1.59299e-07	1.4597e-09	-4.36135	-2.12477	4.36135	down	-4.88644	-2.28878	4.88644	down	0.778263	-1.34651	-1.51052	360	Hs.234642	Cluster Incl. N74607:za55a01.s1 Homo sapiens cDNA, 3 end /clone=IMAGE-296424 /clone_end=3' /gb=N74607 /gi=1231892 /ug=Hs.234642 /len=487
NOSIP	217950_at	1.59757e-07	1.47203e-09	-2.79916	-1.48499	2.79916	down	-2.111	-1.07793	2.111	down	0.752646	-0.732347	-0.325282	51070	Hs.7236	gb:NM_015953.1 /DB_XREF=gi:7705715 /GEN=LOC51070 /FEA=FLmRNA /CNT=155 /TID=Hs.7236.0 /TIER=FL+Stack /STK=71 /UG=Hs.7236 /LL=51070 /DEF=Homo sapiens CGI-25 protein (LOC51070), mRNA. /PROD=CGI-25 protein /FL=gb:NM_015953.1 gb:AF132959.1
SAMSN1	220330_s_at	1.59757e-07	1.47504e-09	5.98037	2.58024	5.98037	up	9.23524	3.20715	9.23524	up	-0.861147	1.71909	2.346	64092	Hs.473341	gb:NM_022136.1 /DB_XREF=gi:11545870 /GEN=SAMSN1 /FEA=FLmRNA /CNT=9 /TID=Hs.24633.0 /TIER=FL /STK=0 /UG=Hs.24633 /LL=64092 /DEF=Homo sapiens SAM domain, SH3 domain and nuclear localisation signals, 1 (SAMSN1), mRNA. /PROD=SAM domain, SH3 domain and nuclear localisationsignals, 1 /FL=gb:AF222927.1 gb:NM_022136.1
NFKBIZ	223217_s_at	1.59757e-07	1.4694e-09	2.45597	1.29629	2.45597	up	2.18731	1.12916	2.18731	up	-0.580609	0.715683	0.548548	64332	Hs.319171	gb:BE646573 /DB_XREF=gi:9970884 /DB_XREF=7e89c10.x1 /CLONE=IMAGE:3292338 /FEA=FLmRNA /CNT=87 /TID=Hs.301183.0 /TIER=Stack /STK=13 /UG=Hs.301183 /UG_TITLE=Homo sapiens MAIL mRNA, complete cds /FL=gb:AB037925.1
MXD1	228846_at	1.59757e-07	1.47558e-09	2.37974	1.25081	2.37974	up	1.99208	0.994278	1.99208	up	-0.382321	0.868486	0.611958	4084	Hs.468908	gb:AW071793 /DB_XREF=gi:6026718 /DB_XREF=ws53f08.x1 /CLONE=IMAGE:2500935 /FEA=EST /CNT=26 /TID=Hs.109012.1 /TIER=Stack /STK=8 /UG=Hs.109012 /LL=4084 /UG_GENE=MAD /UG_TITLE=MAX dimerization protein
SORT1	212807_s_at	1.60693e-07	1.48716e-09	3.08359	1.62461	3.08359	up	6.4069	2.67963	6.4069	up	-0.609231	1.01538	2.0704	6272	Hs.485195	gb:BF447105 /DB_XREF=gi:11512243 /DB_XREF=7p49d07.x1 /CLONE=IMAGE:3649189 /FEA=EST /CNT=86 /TID=Hs.281706.1 /TIER=Stack /STK=9 /UG=Hs.281706 /LL=6272 /UG_GENE=SORT1 /UG_TITLE=sortilin 1
HKR1	231836_at	1.60882e-07	1.49186e-09	-1.85235	-0.889357	1.85235	down	-2.3561	-1.2364	2.3561	down	0.421439	-0.467918	-0.814963	284459	Hs.657027///Hs.729090	gb:BC004513.1 /DB_XREF=gi:13325426 /FEA=mRNA /CNT=33 /TID=Hs.25722.0 /TIER=ConsEnd /STK=0 /UG=Hs.25722 /DEF=Homo sapiens, clone IMAGE:3928207, mRNA, partial cds. /PROD=Unknown (protein for IMAGE:3928207)
LUZP1	1558173_a_at	1.62539e-07	1.5102e-09	-2.49568	-1.31943	2.49568	down	-1.05963	-0.083561	1.05963	down	0.157467	-1.16197	0.0739055	7798	Hs.257900	gb:AK093016.1 /DB_XREF=gi:21751743 /TID=Hs2.396497.2 /CNT=15 /FEA=mRNA /TIER=ConsEnd /STK=0 /LL=7798 /UG_GENE=LUZP1 /UG=Hs.396497 /UG_TITLE=leucine zipper protein 1 /DEF=Homo sapiens cDNA FLJ35697 fis, clone SPLEN2019793, highly similar to Rattus norvegicus putative transcription factor LUZP (Luzp) mRNA.
TSPYL2	218012_at	1.63913e-07	1.52595e-09	-1.77939	-0.831387	1.77939	down	-2.53518	-1.34209	2.53518	down	0.428054	-0.403332	-0.914034	64061	Hs.136164	gb:NM_022117.1 /DB_XREF=gi:11545834 /GEN=SE20-4 /FEA=FLmRNA /CNT=154 /TID=Hs.136164.0 /TIER=FL+Stack /STK=36 /UG=Hs.136164 /LL=64061 /DEF=Homo sapiens cutaneous T-cell lymphoma-associated tumor antigen se20-4 (SE20-4), mRNA. /PROD=cutaneous T-cell lymphoma-associated tumorantigen se20-4 /FL=gb:NM_022117.1 gb:AF273046.1 gb:AF254794.1
HDAC1	201209_at	1.64438e-07	1.53385e-09	-1.63446	-0.708811	1.63446	down	-1.16513	-0.220492	1.16513	down	0.196372	-0.512439	-0.02412	3065	Hs.88556	gb:NM_004964.2 /DB_XREF=gi:13128859 /GEN=HDAC1 /FEA=FLmRNA /CNT=481 /TID=Hs.88556.0 /TIER=FL+Stack /STK=99 /UG=Hs.88556 /LL=3065 /DEF=Homo sapiens histone deacetylase 1 (HDAC1), mRNA. /PROD=histone deacetylase 1 /FL=gb:BC000301.1 gb:NM_004964.2 gb:U50079.1 gb:D50405.1
SLAMF1	239427_at	1.64717e-07	1.53947e-09	-2.30312	-1.20359	2.30312	down	-2.52452	-1.33601	2.52452	down	0.346789	-0.856801	-0.989218	6504		gb:AA131524 /DB_XREF=gi:1693030 /DB_XREF=zl31h02.s1 /CLONE=IMAGE:503571 /FEA=EST /CNT=6 /TID=Hs.71433.0 /TIER=ConsEnd /STK=4 /UG=Hs.71433 /UG_TITLE=ESTs
PLAC8	219014_at	1.65364e-07	1.54854e-09	1.08524	0.118019	1.08524	up	4.64092	2.21441	4.64092	up	-0.0788205	0.0391985	2.13559	51316	Hs.546392	gb:NM_016619.1 /DB_XREF=gi:7706157 /GEN=LOC51316 /FEA=FLmRNA /CNT=86 /TID=Hs.107139.0 /TIER=FL /STK=0 /UG=Hs.107139 /LL=51316 /DEF=Homo sapiens hypothetical protein (LOC51316), mRNA. /PROD=hypothetical protein /FL=gb:NM_016619.1 gb:AF208846.1
	229934_at	1.67321e-07	1.56992e-09	4.20621	2.07252	4.20621	up	4.86418	2.2822	4.86418	up	-0.502704	1.56982	1.77949		Hs.38218	gb:N39230 /DB_XREF=gi:1162437 /DB_XREF=yy50c03.s1 /CLONE=IMAGE:276964 /FEA=EST /CNT=11 /TID=Hs.38218.0 /TIER=Stack /STK=8 /UG=Hs.38218 /UG_TITLE=ESTs
PCNT	203660_s_at	1.6782e-07	1.57767e-09	-1.67632	-0.745297	1.67632	down	-1.83134	-0.872896	1.83134	down	0.336623	-0.408674	-0.536273	5116	Hs.474069	gb:NM_006031.1 /DB_XREF=gi:5174478 /GEN=PCNT /FEA=FLmRNA /CNT=77 /TID=Hs.15896.0 /TIER=FL+Stack /STK=34 /UG=Hs.15896 /LL=5116 /DEF=Homo sapiens pericentrin (PCNT), mRNA. /PROD=pericentrin /FL=gb:U52962.1 gb:NM_006031.1
RPL22	208768_x_at	1.69158e-07	1.59335e-09	-2.72488	-1.44619	2.72488	down	-1.79839	-0.846708	1.79839	down	0.367878	-1.07831	-0.478831	6146	Hs.515329///Hs.554762	gb:D17652.1 /DB_XREF=gi:409069 /FEA=FLmRNA /CNT=271 /TID=Hs.99914.1 /TIER=FL+Stack /STK=64 /UG=Hs.99914 /LL=6146 /UG_GENE=RPL22 /DEF=Human mRNA for HBp15L22, complete cds. /PROD=HBp15L22 /FL=gb:D17652.1
VNN2	205922_at	1.69452e-07	1.60075e-09	2.44602	1.29043	2.44602	up	3.13846	1.65006	3.13846	up	-0.47874	0.811694	1.17132	8875	Hs.293130	gb:NM_004665.1 /DB_XREF=gi:4759313 /GEN=VNN2 /FEA=FLmRNA /CNT=24 /TID=Hs.121102.0 /TIER=FL+Stack /STK=13 /UG=Hs.121102 /LL=8875 /DEF=Homo sapiens vanin 2 (VNN2), mRNA. /PROD=vanin 2 /FL=gb:D89974.1 gb:NM_004665.1
SULT1B1	207601_at	1.69452e-07	1.60316e-09	2.82047	1.49593	2.82047	up	4.78522	2.25859	4.78522	up	-0.525001	0.970932	1.73358	27284	Hs.129742	gb:NM_014465.1 /DB_XREF=gi:7657620 /GEN=ST1B2 /FEA=FLmRNA /CNT=4 /TID=Hs.129742.0 /TIER=FL /STK=0 /UG=Hs.129742 /LL=27284 /DEF=Homo sapiens thyroid hormone slfotransferase (ST1B2), mRNA. /PROD=thyroid hormone slfotransferase /FL=gb:D89479.1 gb:NM_014465.1 gb:U95726.1
RPL22	220960_x_at	1.69452e-07	1.60542e-09	-3.23815	-1.69517	3.23815	down	-2.05428	-1.03863	2.05428	down	0.472073	-1.22309	-0.566562	6146	Hs.515329	gb:NM_000983.1 /DB_XREF=gi:4506612 /GEN=RPL22 /FEA=FLmRNA /CNT=3 /TID=Hs.99914.0 /TIER=FL /STK=0 /UG=Hs.99914 /LL=6146 /DEF=Homo sapiens ribosomal protein L22 (RPL22), mRNA. /PROD=ribosomal protein L22 /FL=gb:NM_000983.1
NAMPT	243296_at	1.70425e-07	1.61775e-09	3.32888	1.73504	3.32888	up	2.02289	1.01642	2.02289	up	-0.73869	0.996346	0.27773	10135	Hs.489615	gb:AA873350 /DB_XREF=gi:2969472 /DB_XREF=oh64h02.s1 /CLONE=IMAGE:1471827 /FEA=EST /CNT=6 /TID=Hs.302232.0 /TIER=ConsEnd /STK=2 /UG=Hs.302232 /UG_TITLE=ESTs
CNIH4	228437_at	1.70669e-07	1.62517e-09	1.94468	0.959531	1.94468	up	4.18753	2.0661	4.18753	up	-0.326678	0.632853	1.73942	29097	Hs.445890	gb:AA834560 /DB_XREF=gi:2908159 /DB_XREF=od63d12.s1 /CLONE=IMAGE:1372631 /FEA=EST /CNT=22 /TID=Hs.108854.2 /TIER=Stack /STK=8 /UG=Hs.108854 /LL=29097 /UG_GENE=HSPC163 /UG_TITLE=HSPC163 protein
	239723_at	1.70669e-07	1.62631e-09	3.12726	1.6449	3.12726	up	2.72316	1.44528	2.72316	up	-0.47054	1.17436	0.974741		Hs.658657	gb:AA588092 /DB_XREF=gi:2402267 /DB_XREF=nm98g07.s1 /CLONE=IMAGE:1076316 /FEA=EST /CNT=6 /TID=Hs.133525.0 /TIER=ConsEnd /STK=4 /UG=Hs.133525 /UG_TITLE=ESTs
VPREB3	220068_at	1.70706e-07	1.62978e-09	-4.62343	-2.20896	4.62343	down	-3.30538	-1.72482	3.30538	down	0.868218	-1.34075	-0.856598	29802	Hs.136713	gb:NM_013378.1 /DB_XREF=gi:7019566 /GEN=VPREB3 /FEA=FLmRNA /CNT=15 /TID=Hs.136713.0 /TIER=FL /STK=6 /UG=Hs.136713 /LL=29802 /DEF=Homo sapiens pre-B lymphocyte gene 3 (VPREB3), mRNA. /PROD=pre-B lymphocyte gene 3 /FL=gb:NM_013378.1 gb:AF163825.1
PLXNC1	213241_at	1.71263e-07	1.63917e-09	2.12991	1.09079	2.12991	up	2.85277	1.51236	2.85277	up	-0.320962	0.769832	1.1914	10154	Hs.584845	gb:AF035307.1 /DB_XREF=gi:2661068 /FEA=mRNA /CNT=82 /TID=Hs.184697.0 /TIER=Stack /STK=38 /UG=Hs.184697 /UG_TITLE=Homo sapiens clone 23785 mRNA sequence /DEF=Homo sapiens clone 23785 mRNA sequence.
MCMBP	217905_at	1.71263e-07	1.64137e-09	1.63584	0.710035	1.63584	up	1.88248	0.912637	1.88248	up	-0.33608	0.373955	0.576557	79892	Hs.124246	gb:NM_024834.1 /DB_XREF=gi:13376242 /GEN=FLJ13081 /FEA=FLmRNA /CNT=186 /TID=Hs.180638.0 /TIER=FL+Stack /STK=8 /UG=Hs.180638 /LL=79892 /DEF=Homo sapiens hypothetical protein FLJ13081 (FLJ13081), mRNA. /PROD=hypothetical protein FLJ13081 /FL=gb:NM_024834.1 gb:BC004183.1
MEN1	202645_s_at	1.72455e-07	1.65595e-09	-2.01829	-1.01314	2.01829	down	-2.13994	-1.09757	2.13994	down	0.327801	-0.685335	-0.769772	4221	Hs.423348	gb:NM_000244.1 /DB_XREF=gi:4557744 /GEN=MEN1 /FEA=FLmRNA /CNT=142 /TID=Hs.24297.0 /TIER=FL+Stack /STK=64 /UG=Hs.24297 /LL=4221 /DEF=Homo sapiens multiple endocrine neoplasia I (MEN1), mRNA. /PROD=multiple endocrine neoplasia I /FL=gb:U93236.1 gb:NM_000244.1
DACH1	205472_s_at	1.73816e-07	1.67219e-09	1.67267	0.74215	1.67267	up	6.9779	2.80279	6.9779	up	-0.593741	0.148409	2.20905	1602	Hs.129452	gb:NM_004392.1 /DB_XREF=gi:4758113 /GEN=DACH /FEA=FLmRNA /CNT=52 /TID=Hs.63931.0 /TIER=FL+Stack /STK=9 /UG=Hs.63931 /LL=1602 /DEF=Homo sapiens dachshund (Drosophila) homolog (DACH), mRNA. /PROD=dachshund (Drosophila) homolog /FL=gb:AF102546.1 gb:NM_004392.1
DIAPH2	205726_at	1.73884e-07	1.67603e-09	1.59373	0.672405	1.59373	up	2.51817	1.33238	2.51817	up	-0.313785	0.35862	1.01859	1730	Hs.226483	gb:NM_006729.1 /DB_XREF=gi:5803002 /GEN=DIAPH2 /FEA=FLmRNA /CNT=39 /TID=Hs.226483.0 /TIER=FL+Stack /STK=28 /UG=Hs.226483 /LL=1730 /DEF=Homo sapiens diaphanous (Drosophila, homolog) 2 (DIAPH2), transcript variant 156, mRNA. /PROD=diaphanous 2 isoform 156 /FL=gb:NM_006729.1
PGS1	219394_at	1.7432e-07	1.68342e-09	2.5262	1.33697	2.5262	up	4.9934	2.32002	4.9934	up	-0.462196	0.87477	1.85783	9489	Hs.375975///Hs.654671	gb:NM_024419.1 /DB_XREF=gi:13259369 /GEN=PGS1 /FEA=FLmRNA /CNT=28 /TID=Hs.278682.0 /TIER=FL+Stack /STK=15 /UG=Hs.278682 /LL=9489 /DEF=Homo sapiens Phosphatidylglycerophosphate Synthase (PGS1), mRNA. /PROD=Phosphatidylglycerophosphate Synthase /FL=gb:NM_024419.1
SAMSN1	1569599_at	1.74595e-07	1.68927e-09	4.22907	2.08034	4.22907	up	7.03381	2.81431	7.03381	up	-0.610901	1.46944	2.20341	64092	Hs.473341	gb:BC020638.1 /DB_XREF=gi:18088330 /TID=Hs2.382844.1 /CNT=3 /FEA=mRNA /TIER=ConsEnd /STK=0 /UG=Hs.382844 /UG_TITLE=Homo sapiens, Similar to SAM domain, SH3 domain and nuclear localisation signals, 1, clone IMAGE:4696730, mRNA /DEF=Homo sapiens, Similar to SAM domain, SH3 domain and nuclear localisation signals, 1, clone IMAGE:4696730, mRNA.
TRBC1///TRBV19	210915_x_at	1.75587e-07	1.70208e-09	-3.15802	-1.65902	3.15802	down	-5.25528	-2.39377	5.25528	down	0.325515	-1.33351	-2.06825	28568///28639	Hs.382212///Hs.449262///Hs.449320///Hs.511720	gb:M15564.1 /DB_XREF=gi:339011 /GEN=TCRB /FEA=FLmRNA /CNT=3 /TID=Hs.303157.1 /TIER=FL /STK=0 /UG=Hs.303157 /LL=6957 /UG_TITLE=T cell receptor beta locus /DEF=Human T-cell receptor rearranged beta-chain V-region (V-D-J) mRNA, complete cds. /FL=gb:M15564.1
ALOX5	204446_s_at	1.75706e-07	1.70644e-09	2.26623	1.1803	2.26623	up	2.68606	1.42549	2.68606	up	-0.492242	0.688053	0.933248	240	Hs.89499	gb:NM_000698.1 /DB_XREF=gi:4502056 /GEN=ALOX5 /FEA=FLmRNA /CNT=78 /TID=Hs.89499.0 /TIER=FL+Stack /STK=8 /UG=Hs.89499 /LL=240 /DEF=Homo sapiens arachidonate 5-lipoxygenase (ALOX5), mRNA. /PROD=arachidonate 5-lipoxygenase /FL=gb:NM_000698.1 gb:J03600.1 gb:J03571.1
PRKCQ	210038_at	1.75762e-07	1.7102e-09	-1.8977	-0.924252	1.8977	down	-2.86897	-1.52053	2.86897	down	0.503751	-0.420501	-1.01678	5588	Hs.498570	gb:AL137145 /DB_XREF=gi:9581557 /FEA=FLmRNA /CNT=30 /TID=Hs.211593.0 /TIER=Stack /STK=10 /UG=Hs.211593 /LL=5588 /UG_GENE=PRKCQ /UG_TITLE=protein kinase C, theta /DEF=Human DNA sequence from clone RP11-563J2 on chromosome 10 Contains ESTs, STSs, GSSs and a CpG island. Contains a novel pseudogene and the 3 part of the PRKCQ gene for protein kinase C theta /FL=gb:NM_006257.1 gb:L01087.1 gb:L07032.1
SH3GLB1	209091_s_at	1.78261e-07	1.73778e-09	2.76524	1.4674	2.76524	up	3.21259	1.68374	3.21259	up	-0.488089	0.979316	1.19565	51100	Hs.136309	gb:AF263293.1 /DB_XREF=gi:8118529 /FEA=FLmRNA /CNT=201 /TID=Hs.136309.0 /TIER=FL /STK=0 /UG=Hs.136309 /LL=51100 /UG_GENE=SH3GLB1 /DEF=Homo sapiens endophilin B1 mRNA, complete cds. /PROD=endophilin B1 /FL=gb:AF263293.1
RHOU	223168_at	1.78717e-07	1.74549e-09	2.15463	1.10744	2.15463	up	3.73561	1.90134	3.73561	up	-0.438861	0.668582	1.46248	58480	Hs.647774	gb:AL096776 /DB_XREF=gi:6137005 /FEA=FLmRNA /CNT=155 /TID=Hs.20252.0 /TIER=Stack /STK=72 /UG=Hs.20252 /LL=58480 /UG_GENE=DJ646B12.2 /UG_TITLE=novel Ras family protein /DEF=Human DNA sequence from clone RP4-646B12 on chromosome 1q42.11-42.3. Contains an FTH1 (ferritin, heavy polypeptide 1) (FTHL6) pseudogene, the gene for a novel Ras family protein, ESTs, STSs, GSSs and a putative CpG island /FL=g…
PTPN18	1569552_at	1.78748e-07	1.74906e-09	2.04808	1.03427	2.04808	up	-1.24286	-0.313665	1.24286	down	-0.118209	0.916064	-0.431874	26469		gb:BC031076.1 /DB_XREF=gi:21410312 /TID=Hs2.382637.1 /CNT=3 /FEA=mRNA /TIER=ConsEnd /STK=0 /UG=Hs.382637 /UG_TITLE=Homo sapiens, clone IMAGE:5277075, mRNA /DEF=Homo sapiens, clone IMAGE:5277075, mRNA.
OLAH	219975_x_at	1.81793e-07	1.78218e-09	14.5616	3.86409	14.5616	up	29.7426	4.89446	29.7426	up	-1.01591	2.84818	3.87855	55301	Hs.24309	gb:NM_018324.1 /DB_XREF=gi:8922870 /GEN=FLJ11106 /FEA=FLmRNA /CNT=30 /TID=Hs.24309.0 /TIER=FL /STK=2 /UG=Hs.24309 /LL=55301 /DEF=Homo sapiens hypothetical protein FLJ11106 (FLJ11106), mRNA. /PROD=hypothetical protein FLJ11106 /FL=gb:NM_018324.1
LDLRAP1	221790_s_at	1.82518e-07	1.79263e-09	-2.41902	-1.27442	2.41902	down	-3.47049	-1.79514	3.47049	down	0.528492	-0.745931	-1.26665	26119	Hs.590911	gb:AL545035 /DB_XREF=gi:12877516 /DB_XREF=AL545035 /CLONE=CS0DI013YH20 (3 prime) /FEA=mRNA /CNT=113 /TID=Hs.184482.0 /TIER=Stack /STK=11 /UG=Hs.184482 /LL=26119 /UG_GENE=DKFZP586D0624 /UG_TITLE=DKFZP586D0624 protein
EIF3D	200005_at	1.84656e-07	1.81701e-09	-1.46049	-0.546449	1.46049	down	-1.63169	-0.706371	1.63169	down	0.323836	-0.222613	-0.382535	8664	Hs.55682	gb:NM_003753.1 /DB_XREF=gi:4503522 /GEN=EIF3S7 /FEA=FLmRNA /CNT=482 /TID=Hs.55682.0 /TIER=FL+Stack /STK=194 /UG=Hs.55682 /LL=8664 /DEF=Homo sapiens eukaryotic translation initiation factor 3, subunit 7 (zeta, 6667kD) (EIF3S7), mRNA. /PROD=eukaryotic translation initiation factor 3,subunit 7 (zeta, 6667kD) /FL=gb:BC000469.1 gb:BC000328.1 gb:NM_003753.1 gb:U54558.1
	237062_at	1.8526e-07	1.82634e-09	2.81987	1.49563	2.81987	up	2.00537	1.00387	2.00537	up	-0.699495	0.796135	0.304372		Hs.666472	gb:BE222109 /DB_XREF=gi:8909427 /DB_XREF=hu05h12.x1 /CLONE=IMAGE:3165767 /FEA=EST /CNT=6 /TID=Hs.159970.0 /TIER=ConsEnd /STK=5 /UG=Hs.159970 /UG_TITLE=ESTs
EIF1B	201738_at	1.87495e-07	1.85272e-09	2.12764	1.08926	2.12764	up	2.27541	1.18613	2.27541	up	-0.243018	0.846239	0.94311	10289	Hs.315230	gb:NM_005875.1 /DB_XREF=gi:5031710 /GEN=GC20 /FEA=FLmRNA /CNT=220 /TID=Hs.21756.0 /TIER=FL+Stack /STK=71 /UG=Hs.21756 /LL=10289 /DEF=Homo sapiens translation factor sui1 homolog (GC20), mRNA. /PROD=translation factor sui1 homolog /FL=gb:AF064607.1 gb:AF077052.1 gb:AF263452.1 gb:NM_005875.1
WBP11	217822_at	1.87495e-07	1.85523e-09	-1.34922	-0.432127	1.34922	down	-1.98378	-0.988252	1.98378	down	0.28628	-0.145848	-0.701972	51729	Hs.655138	gb:NM_016312.1 /DB_XREF=gi:7706500 /GEN=LOC51729 /FEA=FLmRNA /CNT=200 /TID=Hs.16420.0 /TIER=FL+Stack /STK=41 /UG=Hs.16420 /LL=51729 /DEF=Homo sapiens Npw38-binding protein NpwBP (LOC51729), mRNA. /PROD=Npw38-binding protein NpwBP /FL=gb:NM_016312.1 gb:AF118023.1 gb:BC001621.1 gb:AB029309.1
CDK5RAP2	220935_s_at	1.88509e-07	1.86871e-09	3.09486	1.62988	3.09486	up	10.2619	3.35922	10.2619	up	-1.14508	0.484799	2.21415	55755	Hs.269560	gb:NM_018249.1 /DB_XREF=gi:8922723 /GEN=FLJ10867 /FEA=FLmRNA /CNT=3 /TID=Hs.32360.0 /TIER=FL /STK=0 /UG=Hs.32360 /LL=55755 /DEF=Homo sapiens hypothetical protein FLJ10867 (FLJ10867), mRNA. /PROD=hypothetical protein FLJ10867 /FL=gb:NM_018249.1
NMT2	205005_s_at	1.90351e-07	1.89045e-09	-2.54209	-1.34602	2.54209	down	-6.39696	-2.67739	6.39696	down	0.470453	-0.875562	-2.20693	9397	Hs.60339	gb:AW293531 /DB_XREF=gi:6700167 /DB_XREF=UI-H-BI2-ahq-d-03-0-UI.s1 /CLONE=IMAGE:2727604 /FEA=FLmRNA /CNT=40 /TID=Hs.122647.0 /TIER=Stack /STK=11 /UG=Hs.122647 /LL=9397 /UG_GENE=NMT2 /UG_TITLE=N-myristoyltransferase 2 /FL=gb:NM_004808.1 gb:AF043325.1
MARK3	202568_s_at	1.91876e-07	1.91001e-09	1.7998	0.847837	1.7998	up	1.78513	0.836031	1.78513	up	-0.391248	0.456589	0.444784	4140	Hs.35828	gb:AI745639 /DB_XREF=gi:5113927 /DB_XREF=tr24b01.x1 /CLONE=IMAGE:2219209 /FEA=FLmRNA /CNT=174 /TID=Hs.172766.0 /TIER=Stack /STK=27 /UG=Hs.172766 /LL=4140 /UG_GENE=MARK3 /UG_TITLE=MAPmicrotubule affinity-regulating kinase 3 /FL=gb:NM_002376.1 gb:M80359.1
FCGR1A///FCGR1C	216950_s_at	1.91876e-07	1.91261e-09	2.30759	1.20638	2.30759	up	6.55968	2.71363	6.55968	up	-0.603938	0.602446	2.10969	2209///100132417	Hs.635062///Hs.77424	gb:X14355.1 /DB_XREF=gi:31333 /FEA=mRNA /CNT=1 /TID=Hs.77424.2 /TIER=ConsEnd /STK=0 /UG=Hs.77424 /LL=2209 /UG_GENE=FCGR1A /UG_TITLE=Fc fragment of IgG, high affinity Ia, receptor for (CD64) /DEF=Human mRNA for high affinity Fc receptor (FcRI) b form.
CD58	205173_x_at	1.9448e-07	1.94213e-09	2.83727	1.50451	2.83727	up	3.59047	1.84417	3.59047	up	-0.711013	0.793493	1.13316	965	Hs.34341	gb:NM_001779.1 /DB_XREF=gi:4502676 /GEN=CD58 /FEA=FLmRNA /CNT=40 /TID=Hs.75626.0 /TIER=FL+Stack /STK=13 /UG=Hs.75626 /LL=965 /DEF=Homo sapiens CD58 antigen, (lymphocyte function-associated antigen 3) (CD58), mRNA. /PROD=CD58 antigen, (lymphocyte function-associatedantigen 3) /FL=gb:NM_001779.1
SPCS3	222753_s_at	1.95241e-07	1.9533e-09	-1.1482	-0.19937	1.1482	down	2.98793	1.57914	2.98793	up	-0.0768654	-0.276235	1.50228	60559	Hs.42194	gb:AL136660.1 /DB_XREF=gi:12052843 /GEN=DKFZp564J1864 /FEA=FLmRNA /CNT=68 /TID=Hs.42194.0 /TIER=FL+Stack /STK=23 /UG=Hs.42194 /LL=60559 /DEF=Homo sapiens mRNA; cDNA DKFZp564J1864 (from clone DKFZp564J1864); complete cds. /PROD=hypothetical protein /FL=gb:NM_021928.1 gb:AL136660.1
ZEB2	235593_at	1.95455e-07	1.95902e-09	1.54395	0.626626	1.54395	up	3.32143	1.7318	3.32143	up	-0.253547	0.373079	1.47826	9839	Hs.34871	gb:AL546529 /DB_XREF=gi:12879734 /DB_XREF=AL546529 /CLONE=CS0DI030YC02 (5 prime) /FEA=EST /CNT=10 /TID=Hs.114103.0 /TIER=ConsEnd /STK=4 /UG=Hs.114103 /UG_TITLE=ESTs
TLR8	229560_at	1.95934e-07	1.9674e-09	2.40675	1.26709	2.40675	up	3.02813	1.59843	3.02813	up	-0.315097	0.951991	1.28333	51311	Hs.660543	gb:AW872374 /DB_XREF=gi:8006427 /DB_XREF=hl91a07.x1 /CLONE=IMAGE:3009300 /FEA=EST /CNT=13 /TID=Hs.62699.0 /TIER=Stack /STK=10 /UG=Hs.62699 /UG_TITLE=ESTs
ATXN1	203232_s_at	1.9851e-07	2.00106e-09	2.07853	1.05556	2.07853	up	2.5707	1.36216	2.5707	up	-0.258807	0.796756	1.10335	6310	Hs.434961	gb:NM_000332.1 /DB_XREF=gi:4506792 /GEN=SCA1 /FEA=FLmRNA /CNT=133 /TID=Hs.74520.0 /TIER=FL /STK=0 /UG=Hs.74520 /LL=6310 /DEF=Homo sapiens spinocerebellar ataxia 1 (olivopontocerebellar ataxia 1, autosomal dominant, ataxin 1) (SCA1), mRNA. /PROD=ataxin 1 /FL=gb:NM_000332.1
SELL	204563_at	1.9851e-07	2.00417e-09	1.67105	0.740756	1.67105	up	1.54262	0.625379	1.54262	up	-0.328053	0.412704	0.297326	6402	Hs.728756	gb:NM_000655.2 /DB_XREF=gi:5713320 /GEN=SELL /FEA=FLmRNA /CNT=83 /TID=Hs.82848.0 /TIER=FL+Stack /STK=30 /UG=Hs.82848 /LL=6402 /DEF=Homo sapiens selectin L (lymphocyte adhesion molecule 1) (SELL), mRNA. /PROD=selectin L /FL=gb:M25280.1 gb:NM_000655.2
SMC3	209258_s_at	1.9851e-07	1.99888e-09	-3.26559	-1.70734	3.26559	down	-1.01113	-0.015964	1.01113	down	0.25362	-1.45372	0.237656	9126	Hs.24485	gb:AI373676 /DB_XREF=gi:4153542 /DB_XREF=qz53h11.x1 /CLONE=IMAGE:2030661 /FEA=FLmRNA /CNT=124 /TID=Hs.24485.0 /TIER=Stack /STK=8 /UG=Hs.24485 /LL=9126 /UG_GENE=CSPG6 /UG_TITLE=chondroitin sulfate proteoglycan 6 (bamacan) /FL=gb:AF067163.1 gb:NM_005445.1 gb:AF020043.1
THAP11	212910_at	1.9884e-07	2.01219e-09	-1.99487	-0.996292	1.99487	down	-1.37503	-0.459458	1.37503	down	0.347068	-0.649224	-0.11239	57215	Hs.632200	gb:W19873 /DB_XREF=gi:1295962 /DB_XREF=zb40g01.r1 /CLONE=IMAGE:306096 /FEA=mRNA /CNT=93 /TID=Hs.82508.1 /TIER=Stack /STK=37 /UG=Hs.82508 /LL=57215 /UG_GENE=HRIHFB2206 /UG_TITLE=HRIHFB2206 protein
RAB8B	219210_s_at	1.9884e-07	2.01476e-09	1.84463	0.88333	1.84463	up	2.88054	1.52634	2.88054	up	-0.338607	0.544723	1.18773	51762	Hs.389733	gb:NM_016530.1 /DB_XREF=gi:7706562 /GEN=LOC51762 /FEA=FLmRNA /CNT=44 /TID=Hs.321245.0 /TIER=FL /STK=4 /UG=Hs.321245 /LL=51762 /DEF=Homo sapiens RAB-8b protein (LOC51762), mRNA. /PROD=RAB-8b protein /FL=gb:NM_016530.1 gb:AB038995.1
NONO	200057_s_at	2.00987e-07	2.04332e-09	-1.48496	-0.570421	1.48496	down	-1.55358	-0.635595	1.55358	down	0.31037	-0.260052	-0.325226	4841	Hs.533282///Hs.650731	gb:NM_007363.2 /DB_XREF=gi:7657382 /GEN=NONO /FEA=FLmRNA /CNT=2 /TID=Hs.172207.0 /TIER=FL /STK=0 /UG=Hs.172207 /LL=4841 /DEF=Homo sapiens non-POU-domain-containing, octamer-binding (NONO), mRNA. /PROD=non-Pou domain-containing octamer (ATGCAAAT)binding protein /FL=gb:NM_007363.2
P2RY10	214615_at	2.00987e-07	2.04388e-09	-2.16921	-1.11717	2.16921	down	-3.95622	-1.98412	3.95622	down	0.416353	-0.700818	-1.56777	27334	Hs.296433	gb:NM_014499.1 /DB_XREF=gi:10092632 /GEN=P2Y10 /FEA=FLmRNA /CNT=12 /TID=Hs.296433.0 /TIER=ConsEnd /STK=0 /UG=Hs.296433 /LL=27334 /DEF=Homo sapiens putative purinergic receptor (P2Y10), mRNA. /PROD=putative purinergic receptor /FL=gb:NM_014499.1
WSB1	201294_s_at	2.02809e-07	2.06982e-09	3.31302	1.72815	3.31302	up	3.62514	1.85804	3.62514	up	-0.667681	1.06047	1.19036	26118	Hs.446017	gb:N24643 /DB_XREF=gi:1138793 /DB_XREF=yx89f11.s1 /CLONE=IMAGE:268941 /FEA=FLmRNA /CNT=305 /TID=Hs.187991.0 /TIER=Stack /STK=8 /UG=Hs.187991 /LL=26118 /UG_GENE=DKFZP564A122 /UG_TITLE=DKFZP564A122 protein /FL=gb:NM_015626.1 gb:AF106684.1
TTC3	208662_s_at	2.02809e-07	2.06823e-09	-1.73815	-0.797549	1.73815	down	-2.63147	-1.39587	2.63147	down	0.356585	-0.440964	-1.03929	7267	Hs.368214	gb:AI885338 /DB_XREF=gi:5590502 /DB_XREF=wl92e09.x1 /CLONE=IMAGE:2432392 /FEA=FLmRNA /CNT=462 /TID=Hs.118174.2 /TIER=Stack /STK=15 /UG=Hs.118174 /LL=7267 /UG_GENE=TTC3 /UG_TITLE=tetratricopeptide repeat domain 3 /FL=gb:D84294.1
BZW2	217809_at	2.05451e-07	2.10055e-09	-2.12328	-1.08629	2.12328	down	-1.89244	-0.92025	1.89244	down	0.52319	-0.563104	-0.39706	28969	Hs.487635	gb:NM_014038.1 /DB_XREF=gi:7661743 /GEN=HSPC028 /FEA=FLmRNA /CNT=293 /TID=Hs.5216.0 /TIER=FL+Stack /STK=52 /UG=Hs.5216 /LL=28969 /DEF=Homo sapiens HSPC028 protein (HSPC028), mRNA. /PROD=HSPC028 protein /FL=gb:AF083246.1 gb:BC003056.1 gb:NM_014038.1 gb:AF110323.1
TRPS1	218502_s_at	2.05496e-07	2.10476e-09	1.34329	0.425769	1.34329	up	2.80168	1.48629	2.80168	up	-0.230818	0.194951	1.25548	7227	Hs.657018	gb:NM_014112.1 /DB_XREF=gi:7657658 /GEN=TRPS1 /FEA=FLmRNA /CNT=109 /TID=Hs.26102.0 /TIER=FL+Stack /STK=13 /UG=Hs.26102 /LL=7227 /DEF=Homo sapiens trichorhinophalangeal syndrome I gene (TRPS1), mRNA. /PROD=trichorhinophalangeal syndrome I gene /FL=gb:AF183810.1 gb:NM_014112.1
GRB10	209409_at	2.05702e-07	2.1144e-09	3.94464	1.97989	3.94464	up	8.69672	3.12047	8.69672	up	-0.402396	1.5775	2.71808	2887	Hs.164060	gb:D86962.1 /DB_XREF=gi:1503997 /GEN=KIAA0207 /FEA=FLmRNA /CNT=93 /TID=Hs.81875.3 /TIER=FL+Stack /STK=31 /UG=Hs.81875 /LL=2887 /UG_TITLE=growth factor receptor-bound protein 10 /DEF=Human mRNA for KIAA0207 gene, complete cds. /FL=gb:D86962.1 gb:AF000017.1
TMEM260	219757_s_at	2.05702e-07	2.11123e-09	2.93201	1.55189	2.93201	up	2.47669	1.30842	2.47669	up	-0.405829	1.14606	0.902587	54916	Hs.497253	gb:NM_017799.1 /DB_XREF=gi:8923365 /GEN=FLJ20392 /FEA=FLmRNA /CNT=21 /TID=Hs.27047.0 /TIER=FL /STK=1 /UG=Hs.27047 /LL=54916 /DEF=Homo sapiens hypothetical protein FLJ20392 (FLJ20392), mRNA. /PROD=hypothetical protein FLJ20392 /FL=gb:NM_017799.1
NDUFA1	202298_at	2.06502e-07	2.12639e-09	-1.62137	-0.697216	1.62137	down	2.54265	1.34633	2.54265	up	-0.113672	-0.810888	1.23266	4694	Hs.534168	gb:NM_004541.2 /DB_XREF=gi:13699820 /GEN=NDUFA1 /FEA=FLmRNA /CNT=237 /TID=Hs.74823.0 /TIER=FL+Stack /STK=102 /UG=Hs.74823 /LL=4694 /DEF=Homo sapiens NADH dehydrogenase (ubiquinone) 1 alpha subcomplex, 1 (7.5kD, MWFE) (NDUFA1), nuclear gene encoding mitochondrial protein, mRNA. /PROD=NADH dehydrogenase (ubiquinone) 1 alphasubcomplex, 1 /FL=gb:BC000266.1 gb:NM_004541.2 gb:U54993.1
CHMP7	212313_at	2.08096e-07	2.14661e-09	-1.51444	-0.598783	1.51444	down	-1.44777	-0.533833	1.44777	down	0.267708	-0.331075	-0.266125	91782	Hs.5019	gb:BC004344.1 /DB_XREF=gi:13279286 /FEA=mRNA /CNT=204 /TID=Hs.5019.0 /TIER=Stack /STK=109 /UG=Hs.5019 /DEF=Homo sapiens, clone IMAGE:3633354, mRNA, partial cds. /PROD=Unknown (protein for IMAGE:3633354)
TLR1	210176_at	2.08341e-07	2.15296e-09	3.10452	1.63437	3.10452	up	1.62317	0.698816	1.62317	up	-0.293138	1.34123	0.405679	7096	Hs.654532	gb:AL050262.1 /DB_XREF=gi:4886482 /GEN=DKFZp564I0682 /FEA=FLmRNA /CNT=19 /TID=Hs.2474.0 /TIER=FL+Stack /STK=9 /UG=Hs.2474 /LL=7096 /DEF=Homo sapiens mRNA; cDNA DKFZp564I0682 (from clone DKFZp564I0682); complete cds. /PROD=hypothetical protein /FL=gb:D13637.1 gb:NM_003263.1 gb:U88540.1 gb:AL050262.1
CA1	205950_s_at	2.08654e-07	2.16382e-09	5.58091	2.4805	5.58091	up	13.9578	3.803	13.9578	up	-1.15034	1.33016	2.65266	759	Hs.23118	gb:NM_001738.1 /DB_XREF=gi:4502516 /GEN=CA1 /FEA=FLmRNA /CNT=36 /TID=Hs.23118.0 /TIER=FL+Stack /STK=17 /UG=Hs.23118 /LL=759 /DEF=Homo sapiens carbonic anhydrase I (CA1), mRNA. /PROD=carbonic anhydrase I /FL=gb:M33987.1 gb:NM_001738.1
NSUN3	219458_s_at	2.08654e-07	2.16354e-09	2.18516	1.12774	2.18516	up	3.05568	1.61149	3.05568	up	-0.391222	0.736518	1.22027	63899	Hs.448003	gb:NM_022072.1 /DB_XREF=gi:11545784 /GEN=FLJ22609 /FEA=FLmRNA /CNT=36 /TID=Hs.18740.0 /TIER=FL+Stack /STK=9 /UG=Hs.18740 /LL=63899 /DEF=Homo sapiens hypothetical protein FLJ22609 (FLJ22609), mRNA. /PROD=hypothetical protein FLJ22609 /FL=gb:NM_022072.1
	234640_x_at	2.09974e-07	2.18135e-09	3.93329	1.97574	3.93329	up	-1.36807	-0.452137	1.36807	down	-0.274091	1.70164	-0.726228		Hs.632607	gb:AK026267.1 /DB_XREF=gi:10439069 /FEA=mRNA /CNT=1 /TID=Hs.306833.0 /TIER=ConsEnd /STK=0 /UG=Hs.306833 /UG_TITLE=Homo sapiens cDNA: FLJ22614 fis, clone HSI05089 /DEF=Homo sapiens cDNA: FLJ22614 fis, clone HSI05089.
NRDC	208709_s_at	2.12608e-07	2.2126e-09	1.70586	0.770502	1.70586	up	1.94455	0.959436	1.94455	up	-0.387586	0.382916	0.57185	4898	Hs.584782	gb:U64898.1 /DB_XREF=gi:2897866 /FEA=FLmRNA /CNT=309 /TID=Hs.4099.1 /TIER=FL+Stack /STK=110 /UG=Hs.4099 /LL=4898 /UG_GENE=NRD1 /DEF=Homo sapiens NRD convertase mRNA, complete cds. /PROD=NRD convertase /FL=gb:U64898.1
	237554_at	2.15119e-07	2.24266e-09	-3.71375	-1.89288	3.71375	down	-1.53854	-0.621566	1.53854	down	0.518793	-1.37408	-0.102773		Hs.674515	gb:BE348304 /DB_XREF=gi:9260157 /DB_XREF=hw16b10.x1 /CLONE=IMAGE:3183067 /FEA=EST /CNT=7 /TID=Hs.202259.0 /TIER=ConsEnd /STK=7 /UG=Hs.202259 /UG_TITLE=ESTs
ABLIM1	210461_s_at	2.1655e-07	2.26154e-09	-2.84556	-1.50871	2.84556	down	-2.62133	-1.3903	2.62133	down	0.494556	-1.01416	-0.895745	3983	Hs.438236	gb:BC002448.1 /DB_XREF=gi:12803266 /FEA=FLmRNA /CNT=5 /TID=Hs.158203.2 /TIER=FL /STK=0 /UG=Hs.158203 /LL=3983 /UG_GENE=ABLIM /DEF=Homo sapiens, Similar to actin binding LIM protein 1, clone MGC:1224, mRNA, complete cds. /PROD=Similar to actin binding LIM protein 1 /FL=gb:BC002448.1
BCL11B	219528_s_at	2.1694e-07	2.26959e-09	-2.51235	-1.32904	2.51235	down	-4.64943	-2.21706	4.64943	down	0.491399	-0.83764	-1.72566	64919	Hs.709690	gb:NM_022898.1 /DB_XREF=gi:12597634 /GEN=BCL11B /FEA=FLmRNA /CNT=37 /TID=Hs.57987.0 /TIER=FL /STK=4 /UG=Hs.57987 /LL=64919 /DEF=Homo sapiens B-cell lymphomaleukaemia 11B (BCL11B), mRNA. /PROD=B-cell lymphomaleukaemia 11B /FL=gb:NM_022898.1
SCAMP3	201771_at	2.17469e-07	2.28157e-09	-2.03972	-1.02837	2.03972	down	-2.04251	-1.03034	2.04251	down	0.469176	-0.559192	-0.561168	10067	Hs.200600	gb:NM_005698.1 /DB_XREF=gi:5032076 /GEN=SCAMP3 /FEA=FLmRNA /CNT=213 /TID=Hs.200600.0 /TIER=FL+Stack /STK=79 /UG=Hs.200600 /LL=10067 /DEF=Homo sapiens secretory carrier membrane protein 3 (SCAMP3), mRNA. /PROD=secretory carrier membrane protein 3 /FL=gb:BC005135.1 gb:AF005039.1 gb:NM_005698.1 gb:BC000161.2
APMAP	206656_s_at	2.17469e-07	2.28308e-09	2.32571	1.21767	2.32571	up	3.47434	1.79674	3.47434	up	-0.459018	0.758656	1.33772	57136	Hs.472330	gb:BC000353.1 /DB_XREF=gi:12653170 /FEA=FLmRNA /CNT=66 /TID=Hs.284203.0 /TIER=FL /STK=0 /UG=Hs.284203 /LL=4654 /UG_GENE=MYOD1 /DEF=Homo sapiens, myogenic factor 3, clone MGC:8630, mRNA, complete cds. /PROD=myogenic factor 3 /FL=gb:BC000353.1 gb:NM_002478.2
	239022_at	2.17605e-07	2.28849e-09	-2.90487	-1.53847	2.90487	down	-1.28766	-0.364751	1.28766	down	0.424534	-1.11394	0.0597832			gb:AW090199 /DB_XREF=gi:6047543 /DB_XREF=xc92d06.x1 /CLONE=IMAGE:2591723 /FEA=EST /CNT=7 /TID=Hs.145945.0 /TIER=ConsEnd /STK=4 /UG=Hs.145945 /UG_TITLE=ESTs
CKLF	221058_s_at	2.19162e-07	2.30887e-09	1.85425	0.890837	1.85425	up	3.39768	1.76455	3.39768	up	-0.420317	0.47052	1.34423	51192	Hs.15159	gb:NM_016326.2 /DB_XREF=gi:10092611 /GEN=LOC51192 /FEA=FLmRNA /CNT=2 /TID=Hs.15159.1 /TIER=FL /STK=0 /UG=Hs.15159 /LL=51192 /DEF=Homo sapiens chemokine-like factor 3, alternatively spliced (LOC51192), mRNA. /PROD=chemokine-like factor 3, alternatively spliced /FL=gb:NM_016326.2 gb:AF135381.2
MIR21///VMP1	224917_at	2.19451e-07	2.31593e-09	2.45494	1.29569	2.45494	up	3.37992	1.75699	3.37992	up	-0.676915	0.618771	1.08007	81671///406991	Hs.444569	gb:BF674052 /DB_XREF=gi:11947947 /DB_XREF=602137449F1 /CLONE=IMAGE:4273813 /FEA=EST /CNT=139 /TID=Hs.79572.4 /TIER=Stack /STK=13 /UG=Hs.79572 /LL=1509 /UG_GENE=CTSD /UG_TITLE=cathepsin D (lysosomal aspartyl protease)
NFIL3	203574_at	2.1955e-07	2.32867e-09	2.73702	1.4526	2.73702	up	2.23949	1.16317	2.23949	up	-0.534407	0.918198	0.628761	4783	Hs.79334	gb:NM_005384.1 /DB_XREF=gi:4885516 /GEN=NFIL3 /FEA=FLmRNA /CNT=96 /TID=Hs.79334.0 /TIER=FL+Stack /STK=37 /UG=Hs.79334 /LL=4783 /DEF=Homo sapiens nuclear factor, interleukin 3 regulated (NFIL3), mRNA. /PROD=nuclear factor, interleukin 3 regulated /FL=gb:NM_005384.1 gb:U26173.1
EPB41L4A-AS1	225698_at	2.1955e-07	2.32276e-09	-1.7915	-0.841167	1.7915	down	-2.22927	-1.15657	2.22927	down	0.441889	-0.399278	-0.714685	114915	Hs.12082	gb:BF314746 /DB_XREF=gi:11262899 /DB_XREF=601901693F1 /CLONE=IMAGE:4130807 /FEA=EST /CNT=75 /TID=Hs.12082.0 /TIER=Stack /STK=49 /UG=Hs.12082 /UG_TITLE=Homo sapiens mRNA; cDNA DKFZp566L203 (from clone DKFZp566L203)
PPP1R3E	227412_at	2.1955e-07	2.32902e-09	-1.72831	-0.78936	1.72831	down	-1.70403	-0.768948	1.70403	down	0.277557	-0.511803	-0.491391	90673	Hs.601513	gb:AK024489.1 /DB_XREF=gi:10440491 /GEN=FLJ00089 /FEA=mRNA /CNT=35 /TID=Hs.39911.0 /TIER=Stack /STK=12 /UG=Hs.39911 /DEF=Homo sapiens mRNA for FLJ00089 protein, partial cds. /PROD=FLJ00089 protein
TMEM203	225052_at	2.21819e-07	2.35714e-09	-1.52923	-0.612809	1.52923	down	-1.69943	-0.765048	1.69943	down	0.335824	-0.276985	-0.429224	94107	Hs.231029	gb:AL520657 /DB_XREF=gi:12784150 /DB_XREF=AL520657 /CLONE=CS0DB002YJ21 (3 prime) /FEA=EST /CNT=131 /TID=Hs.231029.0 /TIER=Stack /STK=70 /UG=Hs.231029 /UG_TITLE=ESTs
HLA-DRB1///HLA-DRB4///HLA-DRB5///LOC105369230	209312_x_at	2.22655e-07	2.37417e-09	-1.46526	-0.551153	1.46526	down	-3.41795	-1.77313	3.41795	down	0.28451	-0.266642	-1.48862	3123///3126///3127///105369230	Hs.534322///Hs.696211	gb:U65585.1 /DB_XREF=gi:5478215 /GEN=HLA-DRB1 /FEA=FLmRNA /CNT=126 /TID=Hs.180255.0 /TIER=FL /STK=0 /UG=Hs.180255 /LL=3123 /DEF=Homo sapiens MHC class II antigen (HLA-DRB1) mRNA, HLA-DRB1*PBL allele, complete cds. /PROD=MHC class II antigen /FL=gb:NM_002124.1 gb:M33600.1 gb:U65585.1 gb:M28583.1
FBXO21	212229_s_at	2.22655e-07	2.37301e-09	-1.28267	-0.35915	1.28267	down	-2.29384	-1.19777	2.29384	down	0.331188	-0.0279618	-0.866578	23014	Hs.740376	gb:AK001699.1 /DB_XREF=gi:7023121 /FEA=FLmRNA /CNT=200 /TID=Hs.184227.1 /TIER=Stack /STK=23 /UG=Hs.184227 /LL=23014 /UG_GENE=FBXO21 /UG_TITLE=F-box only protein 21 /DEF=Homo sapiens cDNA FLJ10837 fis, clone NT2RP4001260, highly similar to Homo sapiens mRNA for KIAA0875 protein. /FL=gb:AF174601.1
BIN1	202931_x_at	2.23135e-07	2.38337e-09	-2.27697	-1.18712	2.27697	down	-2.57524	-1.3647	2.57524	down	0.436702	-0.750414	-0.928002	274	Hs.193163	gb:NM_004305.1 /DB_XREF=gi:4757747 /GEN=BIN1 /FEA=FLmRNA /CNT=139 /TID=Hs.193163.0 /TIER=FL+Stack /STK=92 /UG=Hs.193163 /LL=274 /DEF=Homo sapiens bridging integrator 1 (BIN1), mRNA. /PROD=bridging integrator 1 /FL=gb:U68485.1 gb:NM_004305.1
CBX7	212914_at	2.23445e-07	2.39099e-09	-1.32738	-0.408579	1.32738	down	-2.03471	-1.02482	2.03471	down	0.26995	-0.138629	-0.75487	23492	Hs.356416	gb:AV648364 /DB_XREF=gi:9869378 /DB_XREF=AV648364 /CLONE=GLCBIF04 /FEA=EST /CNT=78 /TID=Hs.152151.1 /TIER=Stack /STK=34 /UG=Hs.152151 /LL=8502 /UG_GENE=PKP4 /UG_TITLE=plakophilin 4
IMP3	221688_s_at	2.23445e-07	2.39485e-09	-1.73442	-0.794451	1.73442	down	-2.07279	-1.05157	2.07279	down	0.384167	-0.410284	-0.667405	55272	Hs.513043	gb:AL136913.1 /DB_XREF=gi:12053320 /GEN=DKFZp586L0118 /FEA=FLmRNA /CNT=1 /TID=Hs.6118.1 /TIER=FL /STK=0 /UG=Hs.6118 /LL=55272 /DEF=Homo sapiens mRNA; cDNA DKFZp586L0118 (from clone DKFZp586L0118); complete cds. /PROD=hypothetical protein /FL=gb:AL136913.1
APEX1	210027_s_at	2.23504e-07	2.40775e-09	-1.82075	-0.864535	1.82075	down	-2.41197	-1.27021	2.41197	down	0.384876	-0.479659	-0.885336	328	Hs.73722	gb:M80261.1 /DB_XREF=gi:178742 /GEN=APE /FEA=FLmRNA /CNT=25 /TID=Hs.73722.1 /TIER=FL /STK=0 /UG=Hs.73722 /LL=328 /DEF=Human apurinic endonuclease (APE) mRNA, complete cds. /PROD=apurinic endonuclease /FL=gb:M80261.1 gb:BC004979.1
NABP1	222872_x_at	2.23504e-07	2.40085e-09	2.4914	1.31696	2.4914	up	3.89217	1.96057	3.89217	up	-0.440408	0.876549	1.52016	64859	Hs.591610	gb:AU157541 /DB_XREF=gi:11019062 /DB_XREF=AU157541 /CLONE=PLACE1008176 /FEA=FLmRNA /CNT=36 /TID=Hs.118183.0 /TIER=Stack /STK=13 /UG=Hs.118183 /LL=64859 /UG_GENE=FLJ22833 /UG_TITLE=hypothetical protein FLJ22833 /FL=gb:NM_022837.1
CDK5RAP2	233540_s_at	2.23504e-07	2.4046e-09	1.45599	0.541999	1.45599	up	4.4823	2.16424	4.4823	up	-0.27046	0.27154	1.89378	55755	Hs.269560	gb:AK025867.1 /DB_XREF=gi:10438511 /FEA=mRNA /CNT=2 /TID=Hs.32360.2 /TIER=ConsEnd /STK=0 /UG=Hs.32360 /LL=55755 /UG_GENE=FLJ10867 /UG_TITLE=hypothetical protein FLJ10867 /DEF=Homo sapiens cDNA: FLJ22214 fis, clone HRC01534.
IL1R1	202948_at	2.24043e-07	2.41766e-09	4.22648	2.07946	4.22648	up	4.75386	2.2491	4.75386	up	-0.380359	1.6991	1.86874	3554	Hs.701982	gb:NM_000877.1 /DB_XREF=gi:4504658 /GEN=IL1R1 /FEA=FLmRNA /CNT=156 /TID=Hs.82112.0 /TIER=FL+Stack /STK=49 /UG=Hs.82112 /LL=3554 /DEF=Homo sapiens interleukin 1 receptor, type I (IL1R1), mRNA. /PROD=interleukin 1 receptor, type I /FL=gb:NM_000877.1 gb:M27492.1
PHC1	218338_at	2.2504e-07	2.43253e-09	-2.2044	-1.14038	2.2044	down	-5.27893	-2.40024	5.27893	down	0.398546	-0.741838	-2.0017	1911	Hs.744902	gb:NM_004426.1 /DB_XREF=gi:11038623 /GEN=EDR1 /FEA=FLmRNA /CNT=117 /TID=Hs.305985.0 /TIER=FL+Stack /STK=41 /UG=Hs.305985 /LL=1911 /DEF=Homo sapiens early development regulator 1 (homolog of polyhomeotic 1) (EDR1), mRNA. /PROD=early development regulator 1 /FL=gb:NM_004426.1
	241936_x_at	2.26673e-07	2.45433e-09	1.1685	0.224652	1.1685	up	-2.37257	-1.24645	2.37257	down	0.0796732	0.304326	-1.16678		Hs.117688	gb:AI654130 /DB_XREF=gi:4738109 /DB_XREF=ty62b03.x1 /CLONE=IMAGE:2283629 /FEA=EST /CNT=3 /TID=Hs.117688.1 /TIER=ConsEnd /STK=3 /UG=Hs.117688 /UG_TITLE=ESTs, Weakly similar to ALU5_HUMAN ALU SUBFAMILY SC SEQUENCE CONTAMINATION WARNING ENTRY (H.sapiens)
SNX13	213292_s_at	2.27351e-07	2.46645e-09	2.35279	1.23437	2.35279	up	1.96722	0.976157	1.96722	up	-0.464505	0.769867	0.511652	23161	Hs.487648	gb:AA908770 /DB_XREF=gi:3048175 /DB_XREF=ol06a11.s1 /CLONE=IMAGE:1522652 /FEA=mRNA /CNT=45 /TID=Hs.283881.0 /TIER=Stack /STK=12 /UG=Hs.283881 /LL=23161 /UG_GENE=KIAA0713 /UG_TITLE=KIAA0713 protein
MCTP2	229021_at	2.27351e-07	2.46999e-09	2.36481	1.24172	2.36481	up	3.16435	1.66191	3.16435	up	-0.560959	0.680766	1.10095	55784	Hs.33368	gb:AK026984.1 /DB_XREF=gi:10439980 /FEA=mRNA /CNT=22 /TID=Hs.50742.0 /TIER=ConsEnd /STK=0 /UG=Hs.50742 /UG_TITLE=Homo sapiens cDNA: FLJ23331 fis, clone HEP12664 /DEF=Homo sapiens cDNA: FLJ23331 fis, clone HEP12664.
NR3C1	201866_s_at	2.2843e-07	2.48589e-09	1.86017	0.895438	1.86017	up	1.98199	0.986946	1.98199	up	-0.344068	0.551369	0.642878	2908	Hs.122926	gb:NM_000176.1 /DB_XREF=gi:4504132 /GEN=NR3C1 /FEA=FLmRNA /CNT=227 /TID=Hs.75772.0 /TIER=FL+Stack /STK=12 /UG=Hs.75772 /LL=2908 /DEF=Homo sapiens nuclear receptor subfamily 3, group C, member 1 (NR3C1), mRNA. /PROD=nuclear receptor subfamily 3, group C, member 1 /FL=gb:NM_000176.1 gb:M10901.1
RPL36AL	207585_s_at	2.30236e-07	2.52239e-09	-1.88242	-0.912586	1.88242	down	1.02399	0.0341978	1.02399	up	0.0328554	-0.87973	0.0670532	6166	Hs.444749///Hs.745129	gb:NM_001001.1 /DB_XREF=gi:4506650 /GEN=RPL36A /FEA=FLmRNA /CNT=3 /TID=Hs.118857.0 /TIER=FL /STK=0 /UG=Hs.118857 /LL=6166 /DEF=Homo sapiens ribosomal protein L36a (RPL36A), mRNA. /PROD=ribosomal protein L36a /FL=gb:M15661.1 gb:NM_001001.1
NFATC1	211105_s_at	2.30236e-07	2.51948e-09	-1.67121	-0.74089	1.67121	down	-1.72519	-0.786755	1.72519	down	0.388371	-0.352519	-0.398385	4772	Hs.534074	gb:U80918.1 /DB_XREF=gi:4098860 /GEN=NF-ATcC /FEA=FLmRNA /CNT=1 /TID=Hs.96149.4 /TIER=FL /STK=0 /UG=Hs.96149 /LL=4772 /DEF=Homo sapiens transcription factor (NF-ATcC) mRNA, complete cds. /PROD=transcription factor /FL=gb:U80918.1
RAB31	217763_s_at	2.30236e-07	2.51191e-09	2.65284	1.40754	2.65284	up	3.08334	1.6245	3.08334	up	-0.535388	0.872149	1.08911	11031	Hs.744887	gb:NM_006868.1 /DB_XREF=gi:5803130 /GEN=RAB31 /FEA=FLmRNA /CNT=424 /TID=Hs.223025.0 /TIER=FL+Stack /STK=36 /UG=Hs.223025 /LL=11031 /DEF=Homo sapiens RAB31, member RAS oncogene family (RAB31), mRNA. /PROD=RAB31, member RAS oncogene family /FL=gb:NM_006868.1 gb:U59877.1 gb:U57091.1 gb:BC001148.1 gb:AF183421.1 gb:AF234995.1
HDAC4	228813_at	2.30236e-07	2.51885e-09	1.39784	0.483203	1.39784	up	2.63871	1.39983	2.63871	up	-0.238302	0.244902	1.16153	9759	Hs.20516	gb:AW206037 /DB_XREF=gi:6505511 /DB_XREF=UI-H-BI1-afx-a-02-0-UI.s1 /CLONE=IMAGE:2723211 /FEA=EST /CNT=16 /TID=Hs.91400.1 /TIER=Stack /STK=13 /UG=Hs.91400 /LL=9759 /UG_GENE=HDAC4 /UG_TITLE=histone deacetylase 4
TMEM165	218095_s_at	2.3104e-07	2.53542e-09	2.44027	1.28704	2.44027	up	3.83383	1.93879	3.83383	up	-0.512647	0.774391	1.42614	55858	Hs.479766	gb:NM_018475.1 /DB_XREF=gi:8923860 /GEN=LOC55858 /FEA=FLmRNA /CNT=129 /TID=Hs.236510.0 /TIER=FL+Stack /STK=45 /UG=Hs.236510 /LL=55858 /DEF=Homo sapiens uncharacterized hypothalamus protein HTMP (LOC55858), mRNA. /PROD=uncharacterized hypothalamus protein HTMP /FL=gb:AF220188.1 gb:NM_018475.1 gb:AF183409.1 gb:BC003545.1
NSMAF	232148_at	2.31807e-07	2.54808e-09	2.30052	1.20196	2.30052	up	-1.07781	-0.108105	1.07781	down	-0.138916	1.06304	-0.247021	8439	Hs.372000	gb:BF056507 /DB_XREF=gi:10810403 /DB_XREF=7k06a10.x1 /CLONE=IMAGE:3443251 /FEA=mRNA /CNT=12 /TID=Hs.306621.0 /TIER=ConsEnd /STK=5 /UG=Hs.306621 /UG_TITLE=Homo sapiens cDNA FLJ11963 fis, clone HEMBB1001051
OSBPL8	212582_at	2.36882e-07	2.60819e-09	1.96744	0.976318	1.96744	up	1.80534	0.852272	1.80534	up	-0.360265	0.616054	0.492007	114882	Hs.430849	gb:AL049923.1 /DB_XREF=gi:4884169 /FEA=mRNA /CNT=140 /TID=Hs.109694.0 /TIER=Stack /STK=25 /UG=Hs.109694 /LL=57601 /UG_GENE=KIAA1451 /UG_TITLE=KIAA1451 protein /DEF=Homo sapiens mRNA; cDNA DKFZp564E2282 (from clone DKFZp564E2282).
SDCBP	200958_s_at	2.42337e-07	2.67636e-09	1.81615	0.860883	1.81615	up	1.71266	0.776242	1.71266	up	-0.294892	0.565991	0.48135	6386	Hs.200804	gb:NM_005625.1 /DB_XREF=gi:5032082 /GEN=SDCBP /FEA=FLmRNA /CNT=401 /TID=Hs.8180.0 /TIER=FL+Stack /STK=187 /UG=Hs.8180 /LL=6386 /DEF=Homo sapiens syndecan binding protein (syntenin) (SDCBP), mRNA. /PROD=syndecan binding protein (syntenin) /FL=gb:NM_005625.1 gb:AF000652.1
PASK	213534_s_at	2.42337e-07	2.67712e-09	-2.15434	-1.10725	2.15434	down	-3.80103	-1.92639	3.80103	down	0.525802	-0.581446	-1.40059	23178	Hs.397891	gb:D50925.1 /DB_XREF=gi:1469192 /GEN=KIAA0135 /FEA=mRNA /CNT=44 /TID=Hs.79337.1 /TIER=Stack /STK=18 /UG=Hs.79337 /LL=23178 /UG_TITLE=KIAA0135 protein /DEF=Human mRNA for KIAA0135 gene, partial cds.
BANK1	222915_s_at	2.44094e-07	2.70099e-09	-2.50066	-1.32231	2.50066	down	-2.38485	-1.2539	2.38485	down	0.67747	-0.64484	-0.576429	55024	Hs.480400	gb:AA811540 /DB_XREF=gi:2881151 /DB_XREF=ob73e02.s1 /CLONE=IMAGE:1337018 /FEA=FLmRNA /CNT=42 /TID=Hs.193736.0 /TIER=Stack /STK=12 /UG=Hs.193736 /LL=55024 /UG_GENE=FLJ20706 /UG_TITLE=hypothetical protein FLJ20706 /FL=gb:NM_017935.1
PIK3CB	212688_at	2.4451e-07	2.71007e-09	1.76329	0.818266	1.76329	up	3.41702	1.77274	3.41702	up	-0.396732	0.421535	1.37601	5291	Hs.239818	gb:BC003393.1 /DB_XREF=gi:13097275 /FEA=FLmRNA /CNT=105 /TID=Hs.239818.0 /TIER=Stack /STK=32 /UG=Hs.239818 /LL=5291 /UG_GENE=PIK3CB /DEF=Homo sapiens, clone IMAGE:3447173, mRNA, partial cds. /PROD=Unknown (protein for IMAGE:3447173) /FL=gb:NM_006219.1
SBF2	233914_s_at	2.47211e-07	2.74453e-09	2.28645	1.19311	2.28645	up	1.86714	0.900829	1.86714	up	-0.628975	0.564132	0.271854	81846	Hs.577252	gb:AK022478.1 /DB_XREF=gi:10433889 /FEA=mRNA /CNT=2 /TID=Hs.210322.1 /TIER=ConsEnd /STK=0 /UG=Hs.210322 /LL=81846 /UG_GENE=KIAA1766 /UG_TITLE=KIAA1766 protein /DEF=Homo sapiens cDNA FLJ12416 fis, clone MAMMA1003019.
ZAP70	214032_at	2.48415e-07	2.76244e-09	-2.88723	-1.52969	2.88723	down	-4.99015	-2.31908	4.99015	down	0.650508	-0.879181	-1.66857	7535	Hs.234569	gb:AI817942 /DB_XREF=gi:5437110 /DB_XREF=wk41f07.x1 /CLONE=IMAGE:2417989 /FEA=mRNA /CNT=19 /TID=Hs.234569.0 /TIER=Stack /STK=10 /UG=Hs.234569 /LL=7535 /UG_GENE=ZAP70 /UG_TITLE=zeta-chain (TCR) associated protein kinase (70 kD)
TMC8	227353_at	2.50217e-07	2.78705e-09	-2.16673	-1.11552	2.16673	down	-1.92416	-0.944226	1.92416	down	0.366771	-0.748747	-0.577455	147138	Hs.592102	gb:BE671663 /DB_XREF=gi:10032204 /DB_XREF=7a55g10.x1 /CLONE=IMAGE:3222690 /FEA=EST /CNT=37 /TID=Hs.15284.0 /TIER=Stack /STK=27 /UG=Hs.15284 /UG_TITLE=ESTs
ZSWIM6	226208_at	2.51463e-07	2.80553e-09	2.15773	1.10952	2.15773	up	2.02944	1.02108	2.02944	up	-0.340615	0.7689	0.680465	57688	Hs.744939	gb:AI692595 /DB_XREF=gi:4969935 /DB_XREF=wd69f11.x1 /CLONE=IMAGE:2336877 /FEA=mRNA /CNT=60 /TID=Hs.13913.0 /TIER=Stack /STK=8 /UG=Hs.13913 /LL=57688 /UG_GENE=KIAA1577 /UG_TITLE=KIAA1577 protein
KLRC4-KLRK1///KLRK1	205821_at	2.54607e-07	2.84526e-09	-2.15829	-1.10989	2.15829	down	-3.23308	-1.69291	3.23308	down	0.643105	-0.466782	-1.0498	22914///100528032	Hs.387787	gb:NM_007360.1 /DB_XREF=gi:6679051 /GEN=D12S2489E /FEA=FLmRNA /CNT=24 /TID=Hs.74085.0 /TIER=FL /STK=0 /UG=Hs.74085 /LL=22914 /DEF=Homo sapiens DNA segment on chromosome 12 (unique) 2489 expressed sequence (D12S2489E), mRNA. /PROD=NKG2-D type II integral membrane protein /FL=gb:AF260135.1 gb:AF260136.1 gb:NM_007360.1
HLA-DRB1	208306_x_at	2.56298e-07	2.86885e-09	-1.682	-0.75018	1.682	down	-3.74829	-1.90623	3.74829	down	0.411184	-0.338996	-1.49505	3123	Hs.696211	gb:NM_021983.2 /DB_XREF=gi:11875206 /GEN=HLA-DRB4 /FEA=FLmRNA /CNT=2 /TID=Hs.293934.0 /TIER=FL /STK=0 /UG=Hs.293934 /LL=3126 /DEF=Homo sapiens major histocompatibility complex, class II, DR beta 4 (HLA-DRB4), mRNA. /PROD=major histocompatibility complex, class II, DRbeta 4 /FL=gb:NM_021983.2
YIPF6	212340_at	2.56831e-07	2.88421e-09	2.40147	1.26392	2.40147	up	2.49215	1.31739	2.49215	up	-0.61049	0.653425	0.706903	286451	Hs.82719	gb:BE673723 /DB_XREF=gi:10034264 /DB_XREF=7d79h10.x1 /CLONE=IMAGE:3279235 /FEA=mRNA /CNT=195 /TID=Hs.82719.0 /TIER=Stack /STK=10 /UG=Hs.82719 /UG_TITLE=Homo sapiens mRNA; cDNA DKFZp586F1822 (from clone DKFZp586F1822)
CD58	216942_s_at	2.56831e-07	2.88093e-09	2.26115	1.17706	2.26115	up	3.19846	1.67738	3.19846	up	-0.522131	0.654924	1.15525	965	Hs.34341	gb:D28586.1 /DB_XREF=gi:466540 /FEA=mRNA /CNT=1 /TID=Hs.75626.2 /TIER=ConsEnd /STK=0 /UG=Hs.75626 /LL=965 /UG_GENE=CD58 /DEF=Human mRNA for LFA-3(delta D2), partial cds. /PROD=LFA-3(delta D2)
NUDT4///NUDT4P1///NUDT4P2	206302_s_at	2.57314e-07	2.89812e-09	3.37253	1.75383	3.37253	up	5.46897	2.45127	5.46897	up	-0.900297	0.853534	1.55097	11163///170688///440672	Hs.506325///Hs.601274	gb:NM_019094.1 /DB_XREF=gi:10800135 /GEN=NUDT4 /FEA=FLmRNA /CNT=18 /TID=Hs.92381.0 /TIER=FL /STK=0 /UG=Hs.92381 /LL=11163 /DEF=Homo sapiens nudix (nucleoside diphosphate linked moiety X)-type motif 4 (NUDT4), mRNA. /PROD=nudix (nucleoside diphosphate linked moietyX)-type motif 4 /FL=gb:NM_019094.1 gb:AF191653.1 gb:AF191649.1 gb:AF191650.1
LCN2	212531_at	2.57314e-07	2.89905e-09	2.27887	1.18832	2.27887	up	26.2942	4.71668	26.2942	up	-0.494786	0.693533	4.22189	3934	Hs.204238	gb:NM_005564.1 /DB_XREF=gi:5031852 /GEN=LCN2 /FEA=FLmRNA /CNT=166 /TID=Hs.204238.0 /TIER=FL+Stack /STK=71 /UG=Hs.204238 /LL=3934 /DEF=Homo sapiens lipocalin 2 (oncogene 24p3) (LCN2), mRNA. /PROD=lipocalin 2 (oncogene 24p3) /FL=gb:NM_005564.1
HIP1R	38340_at	2.5744e-07	2.90518e-09	-1.82328	-0.866534	1.82328	down	-2.51805	-1.33231	2.51805	down	0.275448	-0.591086	-1.05686	9026	Hs.524815	Cluster Incl. AB014555:Homo sapiens mRNA for KIAA0655 protein, partial cds /cds=(0,3253) /gb=AB014555 /gi=3327123 /ug=Hs.96731 /len=4457
ICAM2	204683_at	2.58017e-07	2.9164e-09	-1.89091	-0.919081	1.89091	down	-2.55403	-1.35278	2.55403	down	0.54097	-0.378111	-0.811806	3384	Hs.431460	gb:NM_000873.2 /DB_XREF=gi:12545398 /GEN=ICAM2 /FEA=FLmRNA /CNT=74 /TID=Hs.83733.0 /TIER=FL+Stack /STK=39 /UG=Hs.83733 /LL=3384 /DEF=Homo sapiens intercellular adhesion molecule 2 (ICAM2), mRNA. /PROD=intercellular adhesion molecule 2 precursor /FL=gb:NM_000873.2 gb:BC003097.1
VAMP2	201557_at	2.58734e-07	2.93103e-09	-2.29471	-1.19831	2.29471	down	-1.59332	-0.672032	1.59332	down	0.268777	-0.929537	-0.403255	6844	Hs.25348	gb:NM_014232.1 /DB_XREF=gi:7657674 /GEN=VAMP2 /FEA=FLmRNA /CNT=254 /TID=Hs.194534.0 /TIER=FL+Stack /STK=85 /UG=Hs.194534 /LL=6844 /DEF=Homo sapiens vesicle-associated membrane protein 2 (synaptobrevin 2) (VAMP2), mRNA. /PROD=vesicle-associated membrane protein 2(synaptobrevin 2) /FL=gb:BC002737.1 gb:NM_014232.1
CFLAR	214486_x_at	2.58734e-07	2.94103e-09	2.54734	1.34899	2.54734	up	1.53539	0.618603	1.53539	up	-0.408628	0.940362	0.209975	8837	Hs.390736	gb:AF041459.1 /DB_XREF=gi:2827291 /FEA=FLmRNA /CNT=6 /TID=Hs.195175.8 /TIER=FL /STK=0 /UG=Hs.195175 /LL=8837 /UG_GENE=CFLAR /DEF=Homo sapiens I-FLICE isoform 2 mRNA, complete cds. /PROD=I-FLICE isoform 2 /FL=gb:AF041459.1
TXN	216609_at	2.58734e-07	2.9365e-09	2.37679	1.24902	2.37679	up	3.81197	1.93054	3.81197	up	-0.721841	0.527174	1.2087	7295	Hs.435136	gb:AF065241.1 /DB_XREF=gi:3153858 /GEN=TXN delta 3 /FEA=mRNA /CNT=1 /TID=Hs.306243.0 /TIER=ConsEnd /STK=0 /UG=Hs.306243 /DEF=Homo sapiens thioredoxin delta 3 (TXN delta 3) mRNA, partial cds. /PROD=thioredoxin delta 3
RBMS1	225265_at	2.58734e-07	2.94344e-09	2.1933	1.13311	2.1933	up	3.12439	1.64357	3.12439	up	-0.433168	0.699938	1.21041	5937	Hs.470412	gb:AI580100 /DB_XREF=gi:4564476 /DB_XREF=tk16d04.x1 /CLONE=IMAGE:2151175 /FEA=mRNA /CNT=106 /TID=Hs.239870.1 /TIER=Stack /STK=13 /UG=Hs.239870 /UG_TITLE=Homo sapiens mRNA; cDNA DKFZp564H0764 (from clone DKFZp564H0764)
OCIAD2	225314_at	2.5898e-07	2.95098e-09	-2.20805	-1.14278	2.20805	down	-2.57178	-1.36276	2.57178	down	0.512961	-0.629814	-0.849804	132299	Hs.95835	gb:BG291649 /DB_XREF=gi:13049586 /DB_XREF=602385778F1 /CLONE=IMAGE:4514827 /FEA=EST /CNT=104 /TID=Hs.95835.0 /TIER=Stack /STK=77 /UG=Hs.95835 /UG_TITLE=ESTs, Weakly similar to unnamed protein product (H.sapiens)
TSPAN3	200972_at	2.59115e-07	2.95725e-09	-1.78804	-0.838381	1.78804	down	-2.11941	-1.08366	2.11941	down	0.387819	-0.450562	-0.695845	10099	Hs.744863	gb:BC000704.1 /DB_XREF=gi:12653830 /FEA=FLmRNA /CNT=371 /TID=Hs.100090.0 /TIER=FL+Stack /STK=75 /UG=Hs.100090 /LL=10099 /UG_GENE=TSPAN-3 /DEF=Homo sapiens, tetraspan 3, clone MGC:965, mRNA, complete cds. /PROD=tetraspan 3 /FL=gb:AF133423.1 gb:BC000704.1 gb:AF054840.1 gb:NM_005724.1 gb:BC004280.1
NELL2	203413_at	2.63521e-07	3.01235e-09	-2.51254	-1.32914	2.51254	down	-3.88133	-1.95655	3.88133	down	0.840922	-0.488221	-1.11563	4753	Hs.505326	gb:NM_006159.1 /DB_XREF=gi:5453765 /GEN=NELL2 /FEA=FLmRNA /CNT=141 /TID=Hs.79389.0 /TIER=FL+Stack /STK=32 /UG=Hs.79389 /LL=4753 /DEF=Homo sapiens nel (chicken)-like 2 (NELL2), mRNA. /PROD=nel (chicken)-like 2 /FL=gb:D83018.1 gb:NM_006159.1
2009-09-01	208657_s_at	2.63563e-07	3.01766e-09	-4.15539	-2.05499	4.15539	down	-2.248	-1.16864	2.248	down	0.615288	-1.4397	-0.553353	10801	Hs.440932	gb:AF142408.1 /DB_XREF=gi:11055010 /FEA=FLmRNA /CNT=466 /TID=Hs.181002.2 /TIER=FL+Stack /STK=215 /UG=Hs.181002 /LL=10801 /UG_GENE=MSF /DEF=Homo sapiens cell division control protein septin D1 mRNA, complete cds. /PROD=cell division control protein septin D1 /FL=gb:AF142569.1 gb:AF142408.1
CYP1B1	202437_s_at	2.64177e-07	3.03399e-09	4.66586	2.22214	4.66586	up	12.6765	3.66408	12.6765	up	-0.631631	1.59051	3.03245	1545	Hs.154654	gb:NM_000104.2 /DB_XREF=gi:13325059 /GEN=CYP1B1 /FEA=FLmRNA /CNT=212 /TID=Hs.154654.0 /TIER=FL+Stack /STK=32 /UG=Hs.154654 /LL=1545 /DEF=Homo sapiens cytochrome P450, subfamily I (dioxin-inducible), polypeptide 1 (glaucoma 3, primary infantile) (CYP1B1), mRNA. /PROD=cytochrome P450, subfamily I (dioxin-inducible),polypeptide 1 /FL=gb:U03688.1 gb:NM_000104.2
RPGRIP1	206608_s_at	2.64177e-07	3.03919e-09	-1.11697	-0.159588	1.11697	down	-2.36454	-1.24156	2.36454	down	0.190403	0.0308152	-1.05116	57096	Hs.126035	gb:NM_020366.1 /DB_XREF=gi:9966834 /GEN=RPGRIP1 /FEA=FLmRNA /CNT=18 /TID=Hs.131917.0 /TIER=FL+Stack /STK=10 /UG=Hs.131917 /LL=57096 /DEF=Homo sapiens retinitis pigmentosa GTPase regulator interacting protein 1 (RPGRIP1), mRNA. /PROD=retinitis pigmentosa GTPase regulatorinteracting protein 1 /FL=gb:AF260257.1 gb:NM_020366.1 gb:AF227257.1
WDR81	226738_at	2.64177e-07	3.03802e-09	-1.16739	-0.223289	1.16739	down	-1.89144	-0.919487	1.89144	down	0.157361	-0.0659284	-0.762126	124997	Hs.234572	gb:BE675297 /DB_XREF=gi:10035838 /DB_XREF=7f06d02.x1 /CLONE=IMAGE:3293859 /FEA=EST /CNT=51 /TID=Hs.22176.0 /TIER=Stack /STK=22 /UG=Hs.22176 /UG_TITLE=ESTs
HMGB2	208808_s_at	2.64521e-07	3.04797e-09	3.77205	1.91535	3.77205	up	6.12998	2.61588	6.12998	up	-0.650961	1.26439	1.96492	3148	Hs.434953	gb:BC000903.1 /DB_XREF=gi:12654170 /FEA=FLmRNA /CNT=274 /TID=Hs.80684.0 /TIER=FL+Stack /STK=67 /UG=Hs.80684 /LL=3148 /UG_GENE=HMG2 /DEF=Homo sapiens, high-mobility group (nonhistone chromosomal) protein 2, clone MGC:5234, mRNA, complete cds. /PROD=high-mobility group (nonhistone chromosomal)protein 2 /FL=gb:BC001063.1 gb:BC000903.1
CPD	201941_at	2.6507e-07	3.05915e-09	3.2917	1.71883	3.2917	up	2.95008	1.56075	2.95008	up	-0.423821	1.29501	1.13693	1362	Hs.446079	gb:BE349147 /DB_XREF=gi:9261086 /DB_XREF=ht51f05.x1 /CLONE=IMAGE:3150273 /FEA=FLmRNA /CNT=187 /TID=Hs.5057.0 /TIER=Stack /STK=26 /UG=Hs.5057 /LL=1362 /UG_GENE=CPD /UG_TITLE=carboxypeptidase D /FL=gb:U65090.1 gb:D85390.1 gb:NM_001304.2
MEGF9	212830_at	2.65303e-07	3.0667e-09	2.98667	1.57854	2.98667	up	2.26728	1.18096	2.26728	up	-0.485116	1.09342	0.695845	1955	Hs.744903	gb:W68084 /DB_XREF=gi:1376954 /DB_XREF=zd42f12.s1 /CLONE=IMAGE:343343 /FEA=mRNA /CNT=96 /TID=Hs.5599.0 /TIER=Stack /STK=22 /UG=Hs.5599 /LL=1955 /UG_GENE=EGFL5 /UG_TITLE=EGF-like-domain, multiple 5
SQRDL	217995_at	2.67669e-07	3.09894e-09	2.25829	1.17523	2.25829	up	3.00353	1.58666	3.00353	up	-0.43763	0.7376	1.14903	58472	Hs.511251	gb:NM_021199.1 /DB_XREF=gi:10864010 /GEN=CGI-44 /FEA=FLmRNA /CNT=179 /TID=Hs.8185.0 /TIER=FL+Stack /STK=61 /UG=Hs.8185 /LL=58472 /DEF=Homo sapiens CGI-44 protein; sulfide dehydrogenase like (yeast) (CGI-44), mRNA. /PROD=CGI-44 protein; sulfide dehydrogenase like(yeast) /FL=gb:AF118085.1 gb:AF151802.1 gb:NM_021199.1
SLC2A3	202497_x_at	2.68604e-07	3.11467e-09	3.1167	1.64002	3.1167	up	5.27948	2.40039	5.27948	up	-0.498131	1.14189	1.90226	6515	Hs.419240	gb:AI631159 /DB_XREF=gi:4682489 /DB_XREF=ts93d05.x1 /CLONE=IMAGE:2238825 /FEA=FLmRNA /CNT=182 /TID=Hs.7594.0 /TIER=Stack /STK=19 /UG=Hs.7594 /LL=6515 /UG_GENE=SLC2A3 /UG_TITLE=solute carrier family 2 (facilitated glucose transporter), member 3 /FL=gb:NM_006931.1 gb:M20681.1
SHMT2	214096_s_at	2.71747e-07	3.15609e-09	-2.07263	-1.05146	2.07263	down	-1.56725	-0.648235	1.56725	down	0.431559	-0.619903	-0.216676	6472	Hs.741179	gb:AW190316 /DB_XREF=gi:6464796 /DB_XREF=xl13g08.x1 /CLONE=IMAGE:2676158 /FEA=EST /CNT=14 /TID=Hs.2186.4 /TIER=Stack /STK=9 /UG=Hs.2186 /LL=1937 /UG_GENE=EEF1G /UG_TITLE=eukaryotic translation elongation factor 1 gamma
OSGEPL1	230032_at	2.72994e-07	3.17824e-09	-1.74228	-0.800974	1.74228	down	-3.04838	-1.60804	3.04838	down	0.284905	-0.516069	-1.32314	64172	Hs.60772	gb:AW130077 /DB_XREF=gi:6131682 /DB_XREF=xf27h02.x1 /CLONE=IMAGE:2619315 /FEA=EST /CNT=12 /TID=Hs.24944.0 /TIER=Stack /STK=10 /UG=Hs.24944 /UG_TITLE=ESTs, Weakly similar to ALU1_HUMAN ALU SUBFAMILY J SEQUENCE CONTAMINATION WARNING ENTRY (H.sapiens)
GOLGA7	1554167_a_at	2.72994e-07	3.18056e-09	2.15403	1.10704	2.15403	up	1.21021	0.27526	1.21021	up	-0.252426	0.854614	0.0228346	51125	Hs.654773	gb:BC012032.1 /DB_XREF=gi:15080581 /TID=Hs2.7953.2 /CNT=11 /FEA=FLmRNA /TIER=FL /STK=3 /LL=51125 /UG_GENE=LOC51125 /UG=Hs.7953 /DEF=Homo sapiens, Similar to hypothetical protein, MNCb-1213, clone MGC:21096 IMAGE:4707385, mRNA, complete cds. /PROD=Similar to hypothetical protein, MNCb-1213 /FL=gb:BC012032.1
SERPINB8	206034_at	2.74761e-07	3.20675e-09	1.4536	0.539628	1.4536	up	2.14807	1.10304	2.14807	up	-0.243061	0.296568	0.859983	5271	Hs.368077	gb:NM_002640.1 /DB_XREF=gi:4505790 /GEN=SERPINB8 /FEA=FLmRNA /CNT=18 /TID=Hs.41726.0 /TIER=FL /STK=3 /UG=Hs.41726 /LL=5271 /DEF=Homo sapiens serine (or cysteine) proteinase inhibitor, clade B (ovalbumin), member 8 (SERPINB8), mRNA. /PROD=serine (or cysteine) proteinase inhibitor, cladeB (ovalbumin), member 8 /FL=gb:L40377.1 gb:NM_002640.1
MTA1	211783_s_at	2.74761e-07	3.2112e-09	-2.53792	-1.34364	2.53792	down	-1.8387	-0.878685	1.8387	down	0.449387	-0.894257	-0.429298	9112	Hs.525629	gb:BC006177.1 /DB_XREF=gi:13544097 /FEA=FLmRNA /CNT=1 /TID=HsAffx.900894.1013 /TIER=FL /STK=0 /DEF=Homo sapiens, Similar to metastasis associated 1, clone MGC:13258, mRNA, complete cds. /PROD=Similar to metastasis associated 1 /FL=gb:BC006177.1
UGCG	204881_s_at	2.75237e-07	3.22186e-09	3.61361	1.85344	3.61361	up	6.95012	2.79704	6.95012	up	-0.392898	1.46054	2.40414	7357	Hs.304249	gb:NM_003358.1 /DB_XREF=gi:4507810 /GEN=UGCG /FEA=FLmRNA /CNT=69 /TID=Hs.152601.0 /TIER=FL+Stack /STK=8 /UG=Hs.152601 /LL=7357 /DEF=Homo sapiens UDP-glucose ceramide glucosyltransferase (UGCG), mRNA. /PROD=ceramide glucosyltransferase /FL=gb:NM_003358.1 gb:D50840.1
SH3GLB1	210101_x_at	2.75237e-07	3.22683e-09	2.89691	1.53452	2.89691	up	3.44221	1.78333	3.44221	up	-0.476037	1.05848	1.3073	51100	Hs.136309	gb:AF257318.1 /DB_XREF=gi:8896091 /FEA=FLmRNA /CNT=23 /TID=Hs.136309.1 /TIER=FL /STK=0 /UG=Hs.136309 /LL=51100 /UG_GENE=SH3GLB1 /DEF=Homo sapiens SH3-containing protein SH3GLB1 mRNA, complete cds. /PROD=SH3-containing protein SH3GLB1 /FL=gb:NM_016009.1 gb:AF350371.1 gb:AF151819.1 gb:AF257318.1
GCLM	203925_at	2.77828e-07	3.2653e-09	1.7103	0.774246	1.7103	up	3.67799	1.87892	3.67799	up	-0.35795	0.416296	1.52097	2730	Hs.315562	gb:NM_002061.1 /DB_XREF=gi:4504010 /GEN=GCLM /FEA=FLmRNA /CNT=76 /TID=Hs.89709.0 /TIER=FL+Stack /STK=15 /UG=Hs.89709 /LL=2730 /DEF=Homo sapiens glutamate-cysteine ligase, modifier subunit (GCLM), mRNA. /PROD=glutamate-cysteine ligase regulatory protein /FL=gb:NM_002061.1 gb:L35546.1
EEA1	204840_s_at	2.77828e-07	3.26737e-09	-3.98983	-1.99633	3.98983	down	1.60687	0.684252	1.60687	up	0.0370384	-1.95929	0.721291	8411	Hs.567367	gb:AI916242 /DB_XREF=gi:5636097 /DB_XREF=wg99b05.x1 /CLONE=IMAGE:2379345 /FEA=FLmRNA /CNT=48 /TID=Hs.2864.0 /TIER=Stack /STK=9 /UG=Hs.2864 /LL=8411 /UG_GENE=EEA1 /UG_TITLE=early endosome antigen 1, 162kD /FL=gb:L40157.1 gb:NM_003566.1
FLT3LG	210607_at	2.83175e-07	3.33543e-09	-7.24143	-2.85627	7.24143	down	-6.22047	-2.63702	6.22047	down	0.689173	-2.1671	-1.94785	2323	Hs.428	gb:U03858.1 /DB_XREF=gi:494978 /FEA=FLmRNA /CNT=5 /TID=Hs.428.1 /TIER=FL /STK=3 /UG=Hs.428 /LL=2323 /UG_GENE=FLT3LG /DEF=Human flt3 ligand mRNA, complete cds. /PROD=flt3 ligand /FL=gb:U03858.1
TREX1	205875_s_at	2.83984e-07	3.35535e-09	-1.63007	-0.704933	1.63007	down	-10.0489	-3.32897	10.0489	down	0.287794	-0.417139	-3.04118	11277	Hs.707026///Hs.713742	gb:NM_016381.1 /DB_XREF=gi:7705352 /GEN=DKFZp434J0310 /FEA=FLmRNA /CNT=31 /TID=Hs.278408.0 /TIER=FL+Stack /STK=22 /UG=Hs.278408 /LL=51482 /DEF=Homo sapiens hypothetical protein (DKFZp434J0310), mRNA. /PROD=hypothetical protein /FL=gb:NM_016381.1 gb:AL137745.1 gb:AF319568.1
LUZP6///MTPN	224656_s_at	2.83984e-07	3.3509e-09	1.60217	0.680023	1.60217	up	1.78361	0.834804	1.78361	up	-0.195374	0.484649	0.63943	136319///767558	Hs.602015	gb:AL533334 /DB_XREF=gi:12796827 /DB_XREF=AL533334 /CLONE=CS0DN003YF24 (5 prime) /FEA=mRNA /CNT=170 /TID=Hs.21321.1 /TIER=Stack /STK=87 /UG=Hs.21321 /UG_TITLE=Homo sapiens clone FLB9213 PRO2474 mRNA, complete cds
TSHZ1	223283_s_at	2.85889e-07	3.38308e-09	-1.83779	-0.877974	1.83779	down	-2.66289	-1.41299	2.66289	down	0.512795	-0.36518	-0.900198	10194	Hs.284217	gb:AF039698.1 /DB_XREF=gi:3170195 /GEN=NY-CO-33 /FEA=FLmRNA /CNT=83 /TID=Hs.284217.0 /TIER=FL+Stack /STK=16 /UG=Hs.284217 /LL=10194 /DEF=Homo sapiens antigen NY-CO-33 (NY-CO-33) mRNA, complete cds. /PROD=antigen NY-CO-33 /FL=gb:AF039698.1
CD6	213958_at	2.86817e-07	3.39932e-09	-3.10042	-1.63246	3.10042	down	-4.18429	-2.06498	4.18429	down	0.385767	-1.2467	-1.67922	923	Hs.744366	gb:AW134823 /DB_XREF=gi:6138369 /DB_XREF=UI-H-BI1-abs-c-11-0-UI.s1 /CLONE=IMAGE:2712956 /FEA=mRNA /CNT=27 /TID=Hs.81226.0 /TIER=Stack /STK=19 /UG=Hs.81226 /LL=923 /UG_GENE=CD6 /UG_TITLE=CD6 antigen
CCND2	200953_s_at	2.91962e-07	3.46563e-09	-2.65428	-1.40832	2.65428	down	-2.43563	-1.2843	2.43563	down	0.581887	-0.826435	-0.702409	894	Hs.376071	gb:NM_001759.1 /DB_XREF=gi:4502616 /GEN=CCND2 /FEA=FLmRNA /CNT=309 /TID=Hs.75586.0 /TIER=FL+Stack /STK=68 /UG=Hs.75586 /LL=894 /DEF=Homo sapiens cyclin D2 (CCND2), mRNA. /PROD=cyclin D2 /FL=gb:M90813.1 gb:NM_001759.1 gb:D13639.1
LRRFIP2	220610_s_at	2.9259e-07	3.48379e-09	2.05764	1.04099	2.05764	up	2.37476	1.24778	2.37476	up	-0.470324	0.570669	0.777457	9209	Hs.740522	gb:NM_006309.1 /DB_XREF=gi:5453725 /GEN=LRRFIP2 /FEA=FLmRNA /CNT=6 /TID=Hs.57672.1 /TIER=FL /STK=0 /UG=Hs.57672 /LL=9209 /DEF=Homo sapiens leucine rich repeat (in FLII) interacting protein 2 (LRRFIP2), mRNA. /PROD=leucine rich repeat (in FLII) interactingprotein 2 /FL=gb:NM_006309.1 gb:AF115509.1
FXYD5	224252_s_at	2.9259e-07	3.4808e-09	-2.10337	-1.0727	2.10337	down	-1.7676	-0.821789	1.7676	down	0.382138	-0.690566	-0.439651	53827	Hs.333418	gb:AF177940.1 /DB_XREF=gi:9957274 /GEN=IWU1 /FEA=FLmRNA /CNT=1 /TID=Hs.294135.2 /TIER=FL /STK=0 /UG=Hs.294135 /LL=53827 /DEF=Homo sapiens ion channel homolog (IWU1) mRNA, complete cds. /PROD=ion channel homolog /FL=gb:AF177940.1
NLRP1	211824_x_at	2.93096e-07	3.49517e-09	1.1872	0.247562	1.1872	up	-6.00253	-2.58557	6.00253	down	-0.0204758	0.227086	-2.60605	22861	Hs.652273	gb:AF229062.1 /DB_XREF=gi:12656110 /GEN=NAC /FEA=FLmRNA /CNT=1 /TID=Hs.104305.1 /TIER=FL /STK=0 /UG=Hs.104305 /LL=22861 /DEF=Homo sapiens NAC-delta splice variant (NAC) mRNA, complete cds, alternatively spliced. /PROD=NAC-delta splice variant /FL=gb:AF229062.1
CD247	210031_at	2.94064e-07	3.5121e-09	-2.70527	-1.43577	2.70527	down	-7.0338	-2.8143	7.0338	down	0.469787	-0.965985	-2.34452	919	Hs.156445	gb:J04132.1 /DB_XREF=gi:623041 /FEA=FLmRNA /CNT=28 /TID=Hs.97087.0 /TIER=FL /STK=0 /UG=Hs.97087 /LL=919 /UG_GENE=CD3Z /DEF=Human T cell receptor zeta-chain mRNA, complete cds. /PROD=T-cell receptor zeta chain /FL=gb:J04132.1 gb:NM_000734.1
SMARCB1	212167_s_at	2.94929e-07	3.52782e-09	-1.83018	-0.871989	1.83018	down	-1.34875	-0.431626	1.34875	down	0.179527	-0.692462	-0.252099	6598	Hs.534350	gb:AK021419.1 /DB_XREF=gi:10432598 /FEA=mRNA /CNT=203 /TID=Hs.159971.2 /TIER=Stack /STK=67 /UG=Hs.159971 /LL=6598 /UG_GENE=SMARCB1 /UG_TITLE=SWISNF related, matrix associated, actin dependent regulator of chromatin, subfamily b, member 1 /DEF=Homo sapiens cDNA FLJ11357 fis, clone HEMBA1000201, highly similar to Homo sapiens mRNA for integrase interactor 1b protein (INI1B).
PHTF1	205702_at	2.95171e-07	3.54151e-09	2.87444	1.52328	2.87444	up	3.41839	1.77332	3.41839	up	-0.451295	1.07198	1.32202	10745	Hs.655824	gb:NM_006608.1 /DB_XREF=gi:5729975 /GEN=PHTF1 /FEA=FLmRNA /CNT=26 /TID=Hs.123637.0 /TIER=FL+Stack /STK=10 /UG=Hs.123637 /LL=10745 /DEF=Homo sapiens putative homeodomain transcription factor (PHTF1), mRNA. /PROD=putative homeodomain transcription factor /FL=gb:NM_006608.1
YOD1	215150_at	2.95171e-07	3.53656e-09	5.32839	2.4137	5.32839	up	4.99813	2.32139	4.99813	up	-1.01666	1.39704	1.30473	55432	Hs.567533///Hs.745490	gb:AF090896.1 /DB_XREF=gi:6690168 /FEA=mRNA /CNT=5 /TID=Hs.163001.1 /TIER=ConsEnd /STK=0 /UG=Hs.163001 /LL=55432 /UG_GENE=PRO0907 /DEF=Homo sapiens clone HQ0131 PRO0131 mRNA, partial cds. /PROD=PRO0131
FAR1	224866_at	2.95871e-07	3.56074e-09	2.80773	1.4894	2.80773	up	4.15035	2.05323	4.15035	up	-0.617925	0.871479	1.43531	84188	Hs.501991	gb:AK024967.1 /DB_XREF=gi:10437394 /FEA=mRNA /CNT=159 /TID=Hs.288368.0 /TIER=Stack /STK=28 /UG=Hs.288368 /UG_TITLE=Homo sapiens cDNA: FLJ21314 fis, clone COL02248 /DEF=Homo sapiens cDNA: FLJ21314 fis, clone COL02248.
NCOA5	225145_at	2.95871e-07	3.55862e-09	-2.23683	-1.16145	2.23683	down	-1.62796	-0.703062	1.62796	down	0.531538	-0.629915	-0.171524	57727	Hs.654991	gb:AB046857.1 /DB_XREF=gi:10047350 /GEN=KIAA1637 /FEA=mRNA /CNT=110 /TID=Hs.288140.0 /TIER=Stack /STK=58 /UG=Hs.288140 /LL=57727 /DEF=Homo sapiens mRNA for KIAA1637 protein, partial cds. /PROD=KIAA1637 protein
RMDN1	218549_s_at	2.9632e-07	3.57155e-09	1.55064	0.632862	1.55064	up	2.28954	1.19506	2.28954	up	-0.327437	0.305425	0.867619	51115	Hs.145386	gb:NM_016033.1 /DB_XREF=gi:7705802 /GEN=LOC51115 /FEA=FLmRNA /CNT=68 /TID=Hs.44222.0 /TIER=FL+Stack /STK=9 /UG=Hs.44222 /LL=51115 /DEF=Homo sapiens CGI-90 protein (LOC51115), mRNA. /PROD=CGI-90 protein /FL=gb:NM_016033.1 gb:AF151848.1
	233302_at	2.96328e-07	3.57707e-09	-2.9632	-1.56716	2.9632	down	-7.51446	-2.90967	7.51446	down	0.664995	-0.902161	-2.24468		Hs.662182	gb:AU146285 /DB_XREF=gi:11007806 /DB_XREF=AU146285 /CLONE=HEMBB1000025 /FEA=mRNA /CNT=4 /TID=Hs.301714.0 /TIER=ConsEnd /STK=1 /UG=Hs.301714 /UG_TITLE=Homo sapiens cDNA FLJ10224 fis, clone HEMBB1000025
ZDHHC3	218078_s_at	2.96367e-07	3.58297e-09	2.00682	1.00491	2.00682	up	3.10282	1.63358	3.10282	up	-0.468894	0.536015	1.16468	51304	Hs.61430	gb:NM_016598.1 /DB_XREF=gi:7706132 /GEN=LOC51304 /FEA=FLmRNA /CNT=173 /TID=Hs.14896.0 /TIER=FL+Stack /STK=54 /UG=Hs.14896 /LL=51304 /DEF=Homo sapiens DHHC1 protein (LOC51304), mRNA. /PROD=DHHC1 protein /FL=gb:NM_016598.1 gb:AF247703.1
GIMAP1-GIMAP5///GIMAP5	218805_at	2.9769e-07	3.60441e-09	-2.0315	-1.02255	2.0315	down	-2.83264	-1.50215	2.83264	down	0.226975	-0.795573	-1.27517	55340///100527949	Hs.647079	gb:NM_018384.1 /DB_XREF=gi:8922984 /GEN=FLJ11296 /FEA=FLmRNA /CNT=77 /TID=Hs.26194.0 /TIER=FL+Stack /STK=21 /UG=Hs.26194 /LL=55340 /DEF=Homo sapiens hypothetical protein FLJ11296 (FLJ11296), mRNA. /PROD=hypothetical protein FLJ11296 /FL=gb:NM_018384.1
LIMK2	202193_at	2.98302e-07	3.61727e-09	2.38635	1.2548	2.38635	up	2.85377	1.51287	2.85377	up	-0.540316	0.714488	0.972552	3985	Hs.474596	gb:NM_005569.2 /DB_XREF=gi:8051619 /GEN=LIMK2 /FEA=FLmRNA /CNT=164 /TID=Hs.278027.0 /TIER=FL+Stack /STK=61 /UG=Hs.278027 /LL=3985 /DEF=Homo sapiens LIM domain kinase 2 (LIMK2), transcript variant 2a, mRNA. /PROD=LIM domain kinase 2 isoform 2a /FL=gb:D45906.1 gb:NM_005569.2
	230733_at	2.99007e-07	3.63129e-09	2.11915	1.08349	2.11915	up	2.0587	1.04174	2.0587	up	-0.34524	0.738246	0.696497		Hs.659034	gb:H98113 /DB_XREF=gi:1118998 /DB_XREF=yx09e09.s1 /CLONE=IMAGE:261256 /FEA=EST /CNT=10 /TID=Hs.190086.0 /TIER=Stack /STK=8 /UG=Hs.190086 /UG_TITLE=ESTs
CKLF	223451_s_at	3.00975e-07	3.66069e-09	1.64804	0.720752	1.64804	up	3.25148	1.7011	3.25148	up	-0.38131	0.339442	1.31979	51192	Hs.15159///Hs.698621	gb:AF096895.2 /DB_XREF=gi:9989691 /GEN=CKLF1 /FEA=FLmRNA /CNT=39 /TID=Hs.15159.2 /TIER=FL+Stack /STK=21 /UG=Hs.15159 /LL=51192 /DEF=Homo sapiens chemokine-like factor 1 (CKLF1) mRNA, complete cds. /PROD=chemokine-like factor 1 /FL=gb:AF096895.2
PLXNC1	206470_at	3.01097e-07	3.66768e-09	5.8695	2.55324	5.8695	up	1.90055	0.926418	1.90055	up	-0.682788	1.87045	0.243629	10154	Hs.584845	gb:NM_005761.1 /DB_XREF=gi:5032222 /GEN=PLXNC1 /FEA=FLmRNA /CNT=13 /TID=Hs.286229.0 /TIER=FL /STK=0 /UG=Hs.286229 /LL=10154 /DEF=Homo sapiens plexin C1 (PLXNC1), mRNA. /PROD=plexin C1 /FL=gb:AF030339.1 gb:NM_005761.1
GIMAP5	215352_at	3.0171e-07	3.68067e-09	-3.17957	-1.66883	3.17957	down	-2.16834	-1.11659	2.16834	down	0.423987	-1.24485	-0.692606	55340		gb:AL080068.1 /DB_XREF=gi:5262475 /FEA=mRNA /CNT=4 /TID=Hs.272534.0 /TIER=ConsEnd /STK=0 /UG=Hs.272534 /UG_TITLE=Homo sapiens mRNA; cDNA DKFZp564J062 (from clone DKFZp564J062) /DEF=Homo sapiens mRNA; cDNA DKFZp564J062 (from clone DKFZp564J062).
CD4	203547_at	3.06066e-07	3.73941e-09	-2.51414	-1.33006	2.51414	down	-2.76174	-1.46558	2.76174	down	0.502265	-0.827798	-0.96331	920	Hs.631659	gb:U47924 /DB_XREF=gi:1633547 /FEA=FLmRNA /CNT=108 /TID=Hs.17483.0 /TIER=Stack /STK=47 /UG=Hs.17483 /LL=920 /UG_GENE=CD4 /UG_TITLE=CD4 antigen (p55) /DEF=Human chromosome 12p13 sequence /FL=gb:M12807.1 gb:NM_000616.1
BNIP3L	221478_at	3.10255e-07	3.79626e-09	3.71758	1.89436	3.71758	up	3.65128	1.8684	3.65128	up	-0.646675	1.24769	1.22173	665	Hs.131226	gb:AL132665.1 /DB_XREF=gi:6137021 /FEA=FLmRNA /CNT=367 /TID=Hs.132955.0 /TIER=FL /STK=0 /UG=Hs.132955 /LL=665 /UG_GENE=BNIP3L /UG_TITLE=BCL2adenovirus E1B 19kD-interacting protein 3-like /DEF=Homo sapiens mRNA; cDNA DKFZp566E034 (from clone DKFZp566E034); complete cds. /FL=gb:AB004788.1 gb:AL132665.1 gb:NM_004331.1 gb:AF060922.1 gb:AF067396.1
KCMF1	217938_s_at	3.10869e-07	3.80946e-09	1.4833	0.568806	1.4833	up	1.51396	0.598324	1.51396	up	-0.204719	0.364087	0.393605	56888	Hs.654968	gb:NM_020122.1 /DB_XREF=gi:10047127 /GEN=DKFZP434L1021 /FEA=FLmRNA /CNT=159 /TID=Hs.5392.0 /TIER=FL+Stack /STK=35 /UG=Hs.5392 /LL=56888 /DEF=Homo sapiens potassium channel modulatory factor (DKFZP434L1021), mRNA. /PROD=potassium channel modulatory factor /FL=gb:NM_020122.1 gb:BC000178.2
CNIH4	228306_at	3.13945e-07	3.8529e-09	1.49968	0.584657	1.49968	up	2.44633	1.29062	2.44633	up	-0.196501	0.388156	1.09412	29097	Hs.445890	gb:T87074 /DB_XREF=gi:715426 /DB_XREF=yd88a09.s1 /CLONE=IMAGE:115288 /FEA=mRNA /CNT=23 /TID=Hs.288613.0 /TIER=Stack /STK=15 /UG=Hs.288613 /UG_TITLE=Homo sapiens cDNA FLJ14175 fis, clone NT2RP2002979
	227857_at	3.1414e-07	3.86678e-09	4.96186	2.31088	4.96186	up	5.11425	2.35452	5.11425	up	-1.4011	0.909783	0.953426			gb:T03538 /DB_XREF=gi:314778 /DB_XREF=IB43 /CLONE=IB43 /FEA=EST /CNT=26 /TID=Hs.22391.1 /TIER=Stack /STK=20 /UG=Hs.22391 /LL=57136 /UG_GENE=C20ORF3 /UG_TITLE=chromosome 20open reading frame 3
	241299_at	3.1414e-07	3.86534e-09	-2.27378	-1.18509	2.27378	down	-4.43449	-2.14877	4.43449	down	0.488298	-0.696795	-1.66047			gb:AI651969 /DB_XREF=gi:4735948 /DB_XREF=wb64g06.x1 /CLONE=IMAGE:2310490 /FEA=EST /CNT=4 /TID=Hs.271044.0 /TIER=ConsEnd /STK=4 /UG=Hs.271044 /UG_TITLE=ESTs
BMX	206464_at	3.14294e-07	3.87443e-09	10.9894	3.45803	10.9894	up	9.88292	3.30494	9.88292	up	-1.20513	2.2529	2.0998	660	Hs.495731	gb:NM_001721.1 /DB_XREF=gi:4502434 /GEN=BMX /FEA=FLmRNA /CNT=17 /TID=Hs.27372.0 /TIER=FL+Stack /STK=8 /UG=Hs.27372 /LL=660 /DEF=Homo sapiens BMX non-receptor tyrosine kinase (BMX), mRNA. /PROD=BMX non-receptor tyrosine kinase /FL=gb:NM_001721.1 gb:AF045459.1
WDR74	221712_s_at	3.16325e-07	3.90525e-09	-1.77023	-0.823937	1.77023	down	-2.22512	-1.15389	2.22512	down	0.401815	-0.422122	-0.75207	54663	Hs.654620	gb:BC006351.1 /DB_XREF=gi:13623492 /FEA=FLmRNA /CNT=1 /TID=HsAffx.901021.1055 /TIER=FL /STK=0 /DEF=Homo sapiens, clone MGC:12596, mRNA, complete cds. /PROD=Unknown (protein for MGC:12596) /FL=gb:BC006351.1
	216342_x_at	3.17017e-07	3.91959e-09	-2.23166	-1.15812	2.23166	down	-1.8447	-0.883385	1.8447	down	0.438707	-0.719411	-0.444678			gb:AL121916 /DB_XREF=gi:7406639 /FEA=DNA_2 /CNT=1 /TID=Hs.283838.0 /TIER=ConsEnd /STK=0 /UG=Hs.283838 /UG_TITLE=Human DNA sequence from clone RP1-189G13 on chromosome 20. Contains an RPL7A (60S ribosomal protein L7A) (SURF3) pseudogene, part of an RPS4 (40S ribosomal protein S4) pseudogene, ESTs, STSs and GSSs /DEF=Human DNA sequence from clone RP1-189G13 on chromosome 20. Contains an RPL7A (60S …
NAIP	204860_s_at	3.17114e-07	3.92658e-09	2.49102	1.31674	2.49102	up	7.94291	2.98967	7.94291	up	-0.796209	0.520527	2.19346	4671	Hs.654500	gb:AI817801 /DB_XREF=gi:5436880 /DB_XREF=wk40d12.x1 /CLONE=IMAGE:2417879 /FEA=FLmRNA /CNT=49 /TID=Hs.79019.0 /TIER=Stack /STK=10 /UG=Hs.79019 /LL=4671 /UG_GENE=BIRC1 /UG_TITLE=baculoviral IAP repeat-containing 1 /FL=gb:NM_004536.1 gb:U19251.1
MEF2A	212535_at	3.2229e-07	3.99657e-09	2.81616	1.49373	2.81616	up	3.26287	1.70614	3.26287	up	-0.299595	1.19414	1.40655	4205	Hs.268675	gb:AA142929 /DB_XREF=gi:1712307 /DB_XREF=zl40g07.s1 /CLONE=IMAGE:504444 /FEA=EST /CNT=126 /TID=Hs.288993.0 /TIER=Stack /STK=10 /UG=Hs.288993 /UG_TITLE=ESTs
FCMR	221602_s_at	3.23338e-07	4.01548e-09	-2.84855	-1.51023	2.84855	down	-8.27589	-3.04891	8.27589	down	0.717194	-0.793032	-2.33172	9214	Hs.744273	gb:AF057557.1 /DB_XREF=gi:3169292 /GEN=TOSO /FEA=FLmRNA /CNT=75 /TID=Hs.58831.0 /TIER=FL /STK=0 /UG=Hs.58831 /LL=9214 /DEF=Homo sapiens anti-Fas-induced apoptosis (TOSO) mRNA, complete cds. /PROD=anti-Fas-induced apoptosis /FL=gb:NM_005449.1 gb:AF057557.1
DENND2D	238524_at	3.25692e-07	4.05068e-09	1.28826	0.365424	1.28826	up	-2.03903	-1.02788	2.03903	down	0.0330594	0.398484	-0.994825	79961	Hs.557850	gb:BE897147 /DB_XREF=gi:10362317 /DB_XREF=601439711F1 /CLONE=IMAGE:3924482 /FEA=EST /CNT=15 /TID=Hs.312582.0 /TIER=ConsEnd /STK=4 /UG=Hs.312582 /UG_TITLE=ESTs
GLRX2	219933_at	3.28446e-07	4.09093e-09	1.02544	0.0362405	1.02544	up	1.83706	0.8774	1.83706	up	-0.196567	-0.160327	0.680832	51022	Hs.458283	gb:NM_016066.1 /DB_XREF=gi:7705627 /GEN=LOC51022 /FEA=FLmRNA /CNT=26 /TID=Hs.5054.0 /TIER=FL+Stack /STK=8 /UG=Hs.5054 /LL=51022 /DEF=Homo sapiens CGI-133 protein (LOC51022), mRNA. /PROD=CGI-133 protein /FL=gb:NM_016066.1 gb:AF151891.1 gb:AF132495.2
CEACAM1	211883_x_at	3.29165e-07	4.12196e-09	3.08718	1.62629	3.08718	up	4.31182	2.1083	4.31182	up	-0.616734	1.00956	1.49156	634	Hs.512682	gb:M76742.1 /DB_XREF=gi:179480 /GEN=BGPa /FEA=FLmRNA /CNT=1 /TID=Hs.50964.4 /TIER=FL /STK=0 /UG=Hs.50964 /LL=634 /DEF=Homo sapiens alternatively spliced biliary glycoprotein (BGPa) mRNA, complete cds. /PROD=biliary glycoprotein /FL=gb:M76742.1
WASF2	221725_at	3.29165e-07	4.11686e-09	1.40963	0.495313	1.40963	up	1.8174	0.861879	1.8174	up	-0.242389	0.252923	0.61949	10163	Hs.469244	gb:AI962978 /DB_XREF=gi:5755691 /DB_XREF=wt25f05.x1 /CLONE=IMAGE:2508513 /FEA=FLmRNA /CNT=460 /TID=Hs.288908.0 /TIER=Stack /STK=10 /UG=Hs.288908 /LL=10163 /UG_GENE=WASF2 /UG_TITLE=WAS protein family, member 2 /FL=gb:NM_006990.1 gb:AB026542.1
TRIQK	225603_s_at	3.29165e-07	4.11414e-09	2.75298	1.461	2.75298	up	2.84426	1.50805	2.84426	up	-0.367187	1.09381	1.14086	286144	Hs.440643	gb:BE962119 /DB_XREF=gi:11764696 /DB_XREF=601655003R1 /CLONE=IMAGE:3845736 /FEA=EST /CNT=87 /TID=Hs.6390.1 /TIER=Stack /STK=18 /UG=Hs.6390 /UG_TITLE=Homo sapiens clone FLB3344 PRO0845 mRNA, complete cds
	243931_at	3.29165e-07	4.12397e-09	2.04339	1.03097	2.04339	up	1.96989	0.978115	1.96989	up	-0.357793	0.673173	0.620322		Hs.662620	gb:R64696 /DB_XREF=gi:836575 /DB_XREF=yi22f12.r1 /CLONE=IMAGE:140015 /FEA=EST /CNT=6 /TID=Hs.188785.0 /TIER=ConsEnd /STK=0 /UG=Hs.188785 /UG_TITLE=ESTs
ADM	202912_at	3.3178e-07	4.1628e-09	2.76421	1.46687	2.76421	up	3.62813	1.85923	3.62813	up	-0.676276	0.790591	1.18295	133	Hs.441047	gb:NM_001124.1 /DB_XREF=gi:4501944 /GEN=ADM /FEA=FLmRNA /CNT=170 /TID=Hs.394.0 /TIER=FL+Stack /STK=73 /UG=Hs.394 /LL=133 /DEF=Homo sapiens adrenomedullin (ADM), mRNA. /PROD=adrenomedullin /FL=gb:NM_001124.1 gb:D14874.1
CDC42EP3	225685_at	3.33902e-07	4.19553e-09	2.11263	1.07904	2.11263	up	3.00347	1.58663	3.00347	up	-0.264294	0.814744	1.32234	10602	Hs.369574	gb:AI801777 /DB_XREF=gi:5367249 /DB_XREF=to95d04.x1 /CLONE=IMAGE:2186023 /FEA=EST /CNT=92 /TID=Hs.6774.0 /TIER=Stack /STK=38 /UG=Hs.6774 /UG_TITLE=ESTs
JRK	214692_s_at	3.35071e-07	4.21634e-09	-1.54326	-0.625983	1.54326	down	-2.56401	-1.3584	2.56401	down	0.294467	-0.331516	-1.06393	8629	Hs.535903	gb:AL041139 /DB_XREF=gi:5935356 /DB_XREF=DKFZp434E2316_r1 /CLONE=DKFZp434E2316 /FEA=mRNA /CNT=41 /TID=Hs.142296.0 /TIER=ConsEnd /STK=0 /UG=Hs.142296 /LL=8629 /UG_GENE=JRK /UG_TITLE=jerky (mouse) homolog
ECHS1	201135_at	3.38473e-07	4.27154e-09	-1.7004	-0.765878	1.7004	down	-2.16321	-1.11317	2.16321	down	0.438938	-0.32694	-0.674234	1892	Hs.76394	gb:NM_004092.2 /DB_XREF=gi:12707569 /GEN=ECHS1 /FEA=FLmRNA /CNT=403 /TID=Hs.76394.0 /TIER=FL+Stack /STK=176 /UG=Hs.76394 /LL=1892 /DEF=Homo sapiens enoyl Coenzyme A hydratase, short chain, 1, mitochondrial (ECHS1), nuclear gene encoding mitochondrial protein, mRNA. /PROD=mitochondrial short-chain enoyl-coenzyme Ahydratase 1 precursor /FL=gb:NM_004092.2 gb:D13900.1
GEMIN4	205527_s_at	3.38473e-07	4.27067e-09	-3.85986	-1.94855	3.85986	down	-6.10016	-2.60885	6.10016	down	0.635515	-1.31303	-1.97333	50628	Hs.499620	gb:NM_015487.1 /DB_XREF=gi:11094402 /GEN=DKFZP434D174 /FEA=FLmRNA /CNT=28 /TID=Hs.302421.0 /TIER=FL /STK=0 /UG=Hs.302421 /LL=25952 /DEF=Homo sapiens DKFZP434D174 protein (DKFZP434D174), mRNA. /PROD=DKFZP434D174 protein /FL=gb:NM_015487.1
F5	204713_s_at	3.39007e-07	4.28447e-09	2.79797	1.48438	2.79797	up	3.56669	1.83459	3.56669	up	-0.605212	0.879166	1.22937	2153	Hs.30054	gb:AA910306 /DB_XREF=gi:3049596 /DB_XREF=ok83a04.s1 /CLONE=IMAGE:1520526 /FEA=FLmRNA /CNT=87 /TID=Hs.30054.0 /TIER=Stack /STK=10 /UG=Hs.30054 /LL=2153 /UG_GENE=F5 /UG_TITLE=coagulation factor V (proaccelerin, labile factor) /FL=gb:NM_000130.2 gb:M14335.1 gb:M16967.1
TMEM165	226825_s_at	3.39146e-07	4.29244e-09	3.92132	1.97134	3.92132	up	2.53449	1.3417	2.53449	up	-0.533227	1.43811	0.808471	55858	Hs.479766	gb:AW665624 /DB_XREF=gi:7458093 /DB_XREF=hi91e01.x1 /CLONE=IMAGE:2979672 /FEA=EST /CNT=69 /TID=Hs.236510.1 /TIER=ConsEnd /STK=0 /UG=Hs.236510 /LL=55858 /UG_GENE=LOC55858 /UG_TITLE=uncharacterized hypothalamus protein HTMP
SERPINB2	204614_at	3.39542e-07	4.31608e-09	2.51019	1.3278	2.51019	up	5.77076	2.52876	5.77076	up	-0.700448	0.627349	1.82831	5055	Hs.594481	gb:NM_002575.1 /DB_XREF=gi:4505594 /GEN=SERPINB2 /FEA=FLmRNA /CNT=150 /TID=Hs.75716.0 /TIER=FL+Stack /STK=41 /UG=Hs.75716 /LL=5055 /DEF=Homo sapiens serine (or cysteine) proteinase inhibitor, clade B (ovalbumin), member 2 (SERPINB2), mRNA. /PROD=serine (or cysteine) proteinase inhibitor, cladeB (ovalbumin), member 2 /FL=gb:NM_002575.1 gb:M18082.1 gb:J03603.1 gb:J02685.1
GPRASP1	204793_at	3.39542e-07	4.30845e-09	-2.35665	-1.23674	2.35665	down	-3.77611	-1.9169	3.77611	down	0.474757	-0.76198	-1.44214	9737	Hs.729265	gb:NM_014710.1 /DB_XREF=gi:7662129 /GEN=KIAA0443 /FEA=FLmRNA /CNT=43 /TID=Hs.113082.0 /TIER=FL+Stack /STK=11 /UG=Hs.113082 /LL=9737 /DEF=Homo sapiens KIAA0443 gene product (KIAA0443), mRNA. /PROD=KIAA0443 gene product /FL=gb:AB007903.1 gb:NM_014710.1
SORT1	224818_at	3.39542e-07	4.31564e-09	4.24908	2.08715	4.24908	up	4.86458	2.28231	4.86458	up	-0.516818	1.57033	1.7655	6272	Hs.485195	gb:BE622952 /DB_XREF=gi:9893892 /DB_XREF=601440817T1 /CLONE=IMAGE:3915557 /FEA=mRNA /CNT=163 /TID=Hs.180372.0 /TIER=Stack /STK=20 /UG=Hs.180372 /UG_TITLE=Homo sapiens cDNA FLJ20750 fis, clone HEP05174
RAB31	217762_s_at	3.40988e-07	4.3407e-09	2.08598	1.06073	2.08598	up	3.78853	1.92164	3.78853	up	-0.516521	0.544205	1.40512	11031	Hs.744887	gb:BE789881 /DB_XREF=gi:10211079 /DB_XREF=601476750F1 /CLONE=IMAGE:3879493 /FEA=FLmRNA /CNT=424 /TID=Hs.223025.0 /TIER=Stack /STK=80 /UG=Hs.223025 /LL=11031 /UG_GENE=RAB31 /UG_TITLE=RAB31, member RAS oncogene family /FL=gb:NM_006868.1 gb:U59877.1 gb:U57091.1 gb:BC001148.1 gb:AF183421.1 gb:AF234995.1
SPPL2A	228478_at	3.42994e-07	4.37251e-09	1.76591	0.820416	1.76591	up	1.64855	0.721194	1.64855	up	-0.425231	0.395185	0.295962	84888	Hs.167619	gb:AA889954 /DB_XREF=gi:3016833 /DB_XREF=aj95e11.s1 /CLONE=IMAGE:1404236 /FEA=EST /CNT=22 /TID=Hs.167619.0 /TIER=Stack /STK=16 /UG=Hs.167619 /UG_TITLE=ESTs, Moderately similar to ALUC_HUMAN !!!! ALU CLASS C WARNING ENTRY !!! (H.sapiens)
FBXO30	226541_at	3.43718e-07	4.38803e-09	1.87052	0.903443	1.87052	up	3.20566	1.68062	3.20566	up	-0.512163	0.391279	1.16846	84085	Hs.421095	gb:AI808182 /DB_XREF=gi:5394748 /DB_XREF=wf93c05.x1 /CLONE=IMAGE:2363144 /FEA=EST /CNT=55 /TID=Hs.95667.0 /TIER=Stack /STK=20 /UG=Hs.95667 /UG_TITLE=ESTs
GLYR1///SEPT6	212414_s_at	3.44894e-07	4.40935e-09	-2.70922	-1.43788	2.70922	down	-2.58662	-1.37107	2.58662	down	0.656824	-0.781055	-0.714245	23157///84656	Hs.387255///Hs.496666	gb:D50918.1 /DB_XREF=gi:1469178 /GEN=KIAA0128 /FEA=mRNA /CNT=148 /TID=Hs.90998.0 /TIER=Stack /STK=14 /UG=Hs.90998 /LL=23157 /UG_TITLE=KIAA0128 protein; septin 2 /DEF=Human mRNA for KIAA0128 gene, partial cds.
JADE2	212660_at	3.47659e-07	4.45105e-09	-1.0683	-0.0953115	1.0683	down	-2.40894	-1.2684	2.40894	down	0.142376	0.0470649	-1.12602	23338	Hs.732155	gb:AI735639 /DB_XREF=gi:5057163 /DB_XREF=at18h12.x1 /CLONE=IMAGE:2355527 /FEA=mRNA /CNT=115 /TID=Hs.9729.1 /TIER=Stack /STK=31 /UG=Hs.9729 /LL=23338 /UG_GENE=KIAA0239 /UG_TITLE=KIAA0239 protein
PCNXL2	229202_at	3.51804e-07	4.51056e-09	-1.84596	-0.884367	1.84596	down	-3.42509	-1.77614	3.42509	down	0.585589	-0.298779	-1.19055	80003		gb:AI768826 /DB_XREF=gi:5235335 /DB_XREF=wj03g03.x1 /CLONE=IMAGE:2401780 /FEA=EST /CNT=18 /TID=Hs.137396.1 /TIER=Stack /STK=17 /UG=Hs.137396 /UG_TITLE=ESTs
WSB1	201296_s_at	3.52527e-07	4.52627e-09	2.2761	1.18656	2.2761	up	3.4406	1.78266	3.4406	up	-0.539512	0.647051	1.24315	26118	Hs.446017///Hs.655024	gb:NM_015626.1 /DB_XREF=gi:7661595 /GEN=DKFZP564A122 /FEA=FLmRNA /CNT=305 /TID=Hs.187991.0 /TIER=FL /STK=0 /UG=Hs.187991 /LL=26118 /DEF=Homo sapiens DKFZP564A122 protein (DKFZP564A122), mRNA. /PROD=DKFZP564A122 protein /FL=gb:NM_015626.1 gb:AF106684.1
ANXA1	201012_at	3.53985e-07	4.55147e-09	1.63472	0.70904	1.63472	up	5.33573	2.41569	5.33573	up	-0.465998	0.243041	1.94969	301	Hs.494173	gb:NM_000700.1 /DB_XREF=gi:4502100 /GEN=ANXA1 /FEA=FLmRNA /CNT=457 /TID=Hs.78225.0 /TIER=FL+Stack /STK=162 /UG=Hs.78225 /LL=301 /DEF=Homo sapiens annexin A1 (ANXA1), mRNA. /PROD=annexin I /FL=gb:BC001275.1 gb:NM_000700.1
ZDHHC19	231122_x_at	3.54484e-07	4.56436e-09	2.13902	1.09695	2.13902	up	51.9106	5.69796	51.9106	up	-0.413445	0.683502	5.28451	131540	Hs.111591	gb:AW014300 /DB_XREF=gi:5863057 /DB_XREF=UI-H-BI0p-aax-a-08-0-UI.s1 /CLONE=IMAGE:2710575 /FEA=EST /CNT=11 /TID=Hs.111591.0 /TIER=Stack /STK=11 /UG=Hs.111591 /UG_TITLE=ESTs
LAMTOR5	202299_s_at	3.57852e-07	4.62737e-09	2.00939	1.00676	2.00939	up	2.97681	1.57376	2.97681	up	-0.323403	0.683354	1.25036	10542	Hs.439815	gb:NM_006402.1 /DB_XREF=gi:5454169 /GEN=XIP /FEA=FLmRNA /CNT=201 /TID=Hs.80464.0 /TIER=FL+Stack /STK=105 /UG=Hs.80464 /LL=10542 /DEF=Homo sapiens hepatitis B virus x-interacting protein (9.6kD) (XIP), mRNA. /PROD=hepatitis B virus x-interacting protein /FL=gb:NM_006402.1 gb:AF029890.1
BAZ1B	208445_s_at	3.57852e-07	4.62395e-09	-1.9156	-0.937797	1.9156	down	-1.15423	-0.206933	1.15423	down	0.219308	-0.718489	0.0123743	9031	Hs.743372	gb:NM_023005.1 /DB_XREF=gi:12711667 /GEN=BAZ1B /FEA=FLmRNA /CNT=2 /TID=Hs.194688.0 /TIER=FL /STK=0 /UG=Hs.194688 /LL=9031 /DEF=Homo sapiens bromodomain adjacent to zinc finger domain, 1B (BAZ1B), mRNA. /PROD=bromodomain adjacent to zinc finger domain, 1B /FL=gb:NM_023005.1 gb:AF072810.1
PUF60	209899_s_at	3.57852e-07	4.62419e-09	-1.6422	-0.715632	1.6422	down	-1.76591	-0.820416	1.76591	down	0.326906	-0.388726	-0.49351	22827	Hs.521924	gb:AF217197.1 /DB_XREF=gi:6740005 /GEN=FIR /FEA=FLmRNA /CNT=42 /TID=Hs.74562.0 /TIER=FL /STK=0 /UG=Hs.74562 /LL=22827 /DEF=Homo sapiens FBP interacting repressor (FIR) mRNA, complete cds. /PROD=FBP interacting repressor /FL=gb:AF217197.1
FLOT1	210142_x_at	3.5871e-07	4.64502e-09	1.36709	0.451107	1.36709	up	2.59458	1.3755	2.59458	up	-0.34926	0.101848	1.02624	10211	Hs.179986	gb:AF117234.1 /DB_XREF=gi:6563241 /FEA=FLmRNA /CNT=17 /TID=Hs.179986.1 /TIER=FL /STK=0 /UG=Hs.179986 /LL=10211 /UG_GENE=FLOT1 /DEF=Homo sapiens flotillin mRNA, complete cds. /PROD=flotillin /FL=gb:AF117234.1
SLC22A15	228497_at	3.59492e-07	4.66173e-09	2.76318	1.46633	2.76318	up	2.82774	1.49965	2.82774	up	-0.47932	0.98701	1.02033	55356	Hs.125482	gb:AI279062 /DB_XREF=gi:3917296 /DB_XREF=qm23a06.x1 /CLONE=IMAGE:1882642 /FEA=mRNA /CNT=28 /TID=Hs.21710.0 /TIER=Stack /STK=13 /UG=Hs.21710 /LL=55356 /UG_GENE=DKFZp761G0313 /UG_TITLE=hypothetical protein DKFZp761G0313
DGKZ	207556_s_at	3.63331e-07	4.71815e-09	-1.83843	-0.878471	1.83843	down	-1.6054	-0.682936	1.6054	down	0.234629	-0.643842	-0.448307	8525	Hs.502461	gb:NM_003646.1 /DB_XREF=gi:4503316 /GEN=DGKZ /FEA=FLmRNA /CNT=4 /TID=Hs.89981.0 /TIER=FL /STK=0 /UG=Hs.89981 /LL=8525 /DEF=Homo sapiens diacylglycerol kinase, zeta (104kD) (DGKZ), mRNA. /PROD=diacylglycerol kinase, zeta (104kD) /FL=gb:U51477.1 gb:NM_003646.1
ARHGAP29	203910_at	3.64167e-07	4.74233e-09	5.50041	2.45954	5.50041	up	4.51059	2.17332	4.51059	up	-1.05832	1.40122	1.115	9411	Hs.483238	gb:NM_004815.1 /DB_XREF=gi:4758881 /GEN=PARG1 /FEA=FLmRNA /CNT=91 /TID=Hs.70983.0 /TIER=FL+Stack /STK=17 /UG=Hs.70983 /LL=9411 /DEF=Homo sapiens PTPL1-associated RhoGAP 1 (PARG1), mRNA. /PROD=PTPL1-associated RhoGAP 1 /FL=gb:U90920.1 gb:NM_004815.1
CYBB	203922_s_at	3.64167e-07	4.73705e-09	1.65743	0.72895	1.65743	up	3.03633	1.60233	3.03633	up	-0.424131	0.304819	1.1782	1536	Hs.292356	gb:AI308863 /DB_XREF=gi:4003734 /DB_XREF=qo78d02.x1 /CLONE=IMAGE:1914627 /FEA=FLmRNA /CNT=96 /TID=Hs.88974.0 /TIER=Stack /STK=8 /UG=Hs.88974 /LL=1536 /UG_GENE=CYBB /UG_TITLE=cytochrome b-245, beta polypeptide (chronic granulomatous disease) /FL=gb:NM_000397.2
ATF7IP2	219870_at	3.64954e-07	4.75925e-09	-2.1021	-1.07183	2.1021	down	-2.10132	-1.0713	2.10132	down	0.394596	-0.677235	-0.676701	80063	Hs.513343	gb:NM_024997.1 /DB_XREF=gi:13376506 /GEN=FLJ12668 /FEA=FLmRNA /CNT=22 /TID=Hs.287540.0 /TIER=FL+Stack /STK=15 /UG=Hs.287540 /LL=80063 /DEF=Homo sapiens hypothetical protein FLJ12668 (FLJ12668), mRNA. /PROD=hypothetical protein FLJ12668 /FL=gb:NM_024997.1
IGHD	230877_at	3.66488e-07	4.78596e-09	-10.533	-3.39685	10.533	down	-13.2802	-3.7312	13.2802	down	1.20978	-2.18707	-2.52142	3495	Hs.510635	gb:AI492643 /DB_XREF=gi:4393646 /DB_XREF=qz18a10.x1 /CLONE=IMAGE:2021850 /FEA=EST /CNT=12 /TID=Hs.284277.1 /TIER=Stack /STK=8 /UG=Hs.284277 /UG_TITLE=Homo sapiens immunoglobulin mu chain antibody MO30 (IgM) mRNA, complete cds
TRAF1	235116_at	3.67373e-07	4.80424e-09	-2.81499	-1.49313	2.81499	down	-1.68025	-0.748676	1.68025	down	0.448157	-1.04497	-0.300519	7185	Hs.531251	gb:AA922208 /DB_XREF=gi:3069517 /DB_XREF=om46c10.s1 /CLONE=IMAGE:1544082 /FEA=EST /CNT=17 /TID=Hs.129024.0 /TIER=ConsEnd /STK=7 /UG=Hs.129024 /UG_TITLE=ESTs
PLXNC1	206471_s_at	3.74158e-07	4.89981e-09	3.42603	1.77654	3.42603	up	2.01485	1.01067	2.01485	up	-0.4847	1.29184	0.525974	10154	Hs.584845	gb:NM_005761.1 /DB_XREF=gi:5032222 /GEN=PLXNC1 /FEA=FLmRNA /CNT=13 /TID=Hs.286229.0 /TIER=FL /STK=0 /UG=Hs.286229 /LL=10154 /DEF=Homo sapiens plexin C1 (PLXNC1), mRNA. /PROD=plexin C1 /FL=gb:AF030339.1 gb:NM_005761.1
RCAN3	219864_s_at	3.74174e-07	4.90686e-09	-4.35075	-2.12127	4.35075	down	-5.62414	-2.49163	5.62414	down	0.714365	-1.4069	-1.77727	11123	Hs.656799	gb:NM_013441.1 /DB_XREF=gi:7305008 /GEN=DSCR1L2 /FEA=FLmRNA /CNT=18 /TID=Hs.274131.0 /TIER=FL /STK=0 /UG=Hs.274131 /LL=11123 /DEF=Homo sapiens Down syndrome critical region gene 1-like 2 (DSCR1L2), mRNA. /PROD=Down syndrome critical region gene 1-like 2protein /FL=gb:NM_013441.1 gb:AF176116.1
	215392_at	3.78643e-07	4.97239e-09	3.31612	1.72949	3.31612	up	1.40485	0.490416	1.40485	up	-0.456353	1.27314	0.0340632		Hs.662884	gb:AU148154 /DB_XREF=gi:11009675 /DB_XREF=AU148154 /CLONE=MAMMA1002744 /FEA=mRNA /CNT=5 /TID=Hs.298014.0 /TIER=ConsEnd /STK=1 /UG=Hs.298014 /UG_TITLE=Homo sapiens cDNA FLJ14136 fis, clone MAMMA1002744
GNS	212335_at	3.79529e-07	4.99098e-09	2.35318	1.23461	2.35318	up	3.39312	1.76261	3.39312	up	-0.469171	0.765439	1.29344	2799	Hs.334534	gb:AW167793 /DB_XREF=gi:6399401 /DB_XREF=xg56d07.x1 /CLONE=IMAGE:2632333 /FEA=EST /CNT=171 /TID=Hs.164036.0 /TIER=Stack /STK=21 /UG=Hs.164036 /UG_TITLE=Homo sapiens AKAP350C mRNA sequence, alternatively spliced
ATP5J2	202961_s_at	3.82486e-07	5.03685e-09	1.04815	0.0678511	1.04815	up	2.17287	1.1196	2.17287	up	-0.261259	-0.193408	0.858344	9551	Hs.521056///Hs.656515	gb:NM_004889.1 /DB_XREF=gi:4757811 /GEN=ATP5J2 /FEA=FLmRNA /CNT=144 /TID=Hs.155751.0 /TIER=FL+Stack /STK=103 /UG=Hs.155751 /LL=9551 /DEF=Homo sapiens ATP synthase, H+ transporting, mitochondrial F0 complex, subunit f, isoform 2 (ATP5J2), mRNA. /PROD=ATP synthase, H+ transporting, mitochondrial F0complex, subunit f, isoform 2 /FL=gb:BC003678.1 gb:NM_004889.1 gb:AF047436.1
UXS1	225583_at	3.85598e-07	5.08488e-09	-2.37549	-1.24822	2.37549	down	-1.54999	-0.632257	1.54999	down	0.346604	-0.901621	-0.285653	80146	Hs.743389	gb:AL573637 /DB_XREF=gi:12933066 /DB_XREF=AL573637 /CLONE=CS0DI052YD01 (3 prime) /FEA=EST /CNT=94 /TID=Hs.288158.1 /TIER=Stack /STK=8 /UG=Hs.288158 /LL=80146 /UG_GENE=FLJ23591 /UG_TITLE=hypothetical protein FLJ23591
2009-09-01	41220_at	3.85632e-07	5.09238e-09	-2.13389	-1.09349	2.13389	down	-2.1024	-1.07204	2.1024	down	0.373665	-0.719822	-0.698372	10801	Hs.440932	Cluster Incl. AB023208:Homo sapiens mRNA for KIAA0991 protein, complete cds /cds=(732,2000) /gb=AB023208 /gi=4589625 /ug=Hs.181002 /len=3938
IL27RA	222062_at	3.86965e-07	5.11707e-09	-2.97929	-1.57497	2.97929	down	-2.28468	-1.19199	2.28468	down	0.456996	-1.11797	-0.734994	9466		gb:AI983115 /DB_XREF=gi:5810334 /DB_XREF=wu18b02.x1 /CLONE=IMAGE:2517291 /FEA=EST /CNT=10 /TID=Hs.132781.1 /TIER=Stack /STK=8 /UG=Hs.132781 /LL=9466 /UG_GENE=WSX-1 /UG_TITLE=class I cytokine receptor
TANK	207616_s_at	3.8738e-07	5.12963e-09	2.20333	1.13969	2.20333	up	1.56224	0.643617	1.56224	up	-0.373928	0.765759	0.269689	10010	Hs.132257	gb:NM_004180.1 /DB_XREF=gi:4759249 /GEN=TANK /FEA=FLmRNA /CNT=3 /TID=Hs.146847.0 /TIER=FL /STK=0 /UG=Hs.146847 /LL=10010 /DEF=Homo sapiens TRAF family member-associated NFKB activator (TANK), mRNA. /PROD=TRAF family member-associated NFKB activator /FL=gb:U63830.1 gb:NM_004180.1
INPP4B	205376_at	3.89486e-07	5.16466e-09	-2.61777	-1.38834	2.61777	down	-4.92299	-2.29953	4.92299	down	0.580943	-0.807394	-1.71859	8821	Hs.531403	gb:NM_003866.1 /DB_XREF=gi:4504706 /GEN=INPP4B /FEA=FLmRNA /CNT=42 /TID=Hs.153687.0 /TIER=FL+Stack /STK=11 /UG=Hs.153687 /LL=8821 /DEF=Homo sapiens inositol polyphosphate-4-phosphatase, type II, 105kD (INPP4B), mRNA. /PROD=inositol polyphosphate-4-phosphatase, type II,105kD /FL=gb:NM_003866.1 gb:U96922.1
ZAP70	1555613_a_at	3.89488e-07	5.1718e-09	-2.67001	-1.41684	2.67001	down	-5.32829	-2.41367	5.32829	down	0.691179	-0.725664	-1.72249	7535	Hs.234569	gb:AB083211.1 /DB_XREF=gi:26453339 /TID=Hs2.234569.2 /CNT=1 /FEA=FLmRNA /TIER=FL /STK=1 /LL=7535 /UG_GENE=ZAP70 /UG=Hs.234569 /DEF=Homo sapiens mRNA for truncated ZAP kinase, complete cds. /PROD=truncated ZAP kinase /FL=gb:AB083211.1
FNDC3B	218618_s_at	3.91575e-07	5.2093e-09	2.54527	1.34782	2.54527	up	2.58004	1.36739	2.58004	up	-0.575801	0.772018	0.791593	64778	Hs.744888	gb:NM_022763.1 /DB_XREF=gi:12232434 /GEN=FLJ23399 /FEA=FLmRNA /CNT=82 /TID=Hs.299883.0 /TIER=FL /STK=2 /UG=Hs.299883 /LL=64778 /DEF=Homo sapiens hypothetical protein FLJ23399 (FLJ23399), mRNA. /PROD=hypothetical protein FLJ23399 /FL=gb:NM_022763.1
NUMB	230462_at	3.91575e-07	5.221e-09	2.3735	1.24701	2.3735	up	1.5391	0.622089	1.5391	up	-0.41778	0.829234	0.204309	8650	Hs.654609	gb:AU158026 /DB_XREF=gi:11019547 /DB_XREF=AU158026 /CLONE=PLACE1010628 /FEA=mRNA /CNT=15 /TID=Hs.163495.0 /TIER=Stack /STK=12 /UG=Hs.163495 /UG_TITLE=Homo sapiens cDNA FLJ13608 fis, clone PLACE1010628
LPCAT2	239598_s_at	3.91575e-07	5.21863e-09	1.99583	0.99699	1.99583	up	2.1655	1.1147	2.1655	up	-0.499127	0.497863	0.615572	54947	Hs.460857	gb:AA789296 /DB_XREF=gi:2849416 /DB_XREF=aj28d09.s1 /CLONE=1391633 /FEA=EST /CNT=4 /TID=Hs.122398.0 /TIER=ConsEnd /STK=4 /UG=Hs.122398 /UG_TITLE=ESTs, Highly similar to unnamed protein product (H.sapiens)
PAQR8	227626_at	3.94222e-07	5.2635e-09	-1.75302	-0.809841	1.75302	down	-2.43029	-1.28113	2.43029	down	0.333624	-0.476217	-0.947503	85315	Hs.239388	gb:AI655524 /DB_XREF=gi:4739503 /DB_XREF=tt13g09.x1 /CLONE=IMAGE:2240704 /FEA=EST /CNT=26 /TID=Hs.239388.0 /TIER=Stack /STK=16 /UG=Hs.239388 /UG_TITLE=Human DNA sequence from clone RP1-304B14 on chromosome 6. Contains a gene for a novel protein and a part of a gene for a novel protein with two isoforms. Contains ESTs, STSs, GSSs and a CpG island
MFSD14B	223073_at	3.94304e-07	5.27902e-09	2.45958	1.29841	2.45958	up	2.99679	1.58342	2.99679	up	-0.48227	0.816145	1.10115	84641	Hs.555996	gb:AF255650.1 /DB_XREF=gi:12005824 /FEA=FLmRNA /CNT=172 /TID=Hs.13453.1 /TIER=FL+Stack /STK=65 /UG=Hs.13453 /LL=23451 /UG_GENE=SF3B1 /DEF=Homo sapiens DC27 mRNA, complete cds. /PROD=DC27 /FL=gb:AF255650.1
GPR160	223423_at	3.94304e-07	5.27502e-09	3.69162	1.88425	3.69162	up	4.90733	2.29494	4.90733	up	-0.541733	1.34252	1.75321	26996	Hs.231320	gb:BC000181.2 /DB_XREF=gi:13111815 /FEA=FLmRNA /CNT=67 /TID=Hs.97101.0 /TIER=FL+Stack /STK=14 /UG=Hs.97101 /LL=26996 /UG_GENE=GPCR150 /DEF=Homo sapiens, putative G protein-coupled receptor, clone MGC:5003, mRNA, complete cds. /PROD=putative G protein-coupled receptor /FL=gb:NM_014373.1 gb:BC000181.2
RPL13A	200715_x_at	3.94835e-07	5.29335e-09	-2.28423	-1.19171	2.28423	down	-2.33568	-1.22384	2.33568	down	0.492354	-0.699354	-0.73149	23521	Hs.523185	gb:BC000514.1 /DB_XREF=gi:12653484 /FEA=FLmRNA /CNT=1019 /TID=Hs.119122.0 /TIER=FL+Stack /STK=261 /UG=Hs.119122 /LL=23521 /UG_GENE=RPL13A /DEF=Homo sapiens, ribosomal protein L13a, clone MGC:8547, mRNA, complete cds. /PROD=ribosomal protein L13a /FL=gb:NM_012423.1 gb:BC000514.1
CPD	201943_s_at	3.96704e-07	5.32567e-09	3.66479	1.87373	3.66479	up	2.54615	1.34832	2.54615	up	-0.581335	1.29239	0.766985	1362	Hs.446079	gb:NM_001304.2 /DB_XREF=gi:8051580 /GEN=CPD /FEA=FLmRNA /CNT=187 /TID=Hs.5057.0 /TIER=FL+Stack /STK=16 /UG=Hs.5057 /LL=1362 /DEF=Homo sapiens carboxypeptidase D (CPD), mRNA. /PROD=carboxypeptidase D precursor /FL=gb:U65090.1 gb:D85390.1 gb:NM_001304.2
LRRN3	209841_s_at	4.00001e-07	5.38235e-09	-7.05544	-2.81874	7.05544	down	-5.79731	-2.53538	5.79731	down	1.22637	-1.59236	-1.30901	54674	Hs.3781	gb:AL442092.1 /DB_XREF=gi:10241766 /GEN=DKFZp761K2424 /FEA=FLmRNA /CNT=66 /TID=Hs.3781.0 /TIER=FL+Stack /STK=11 /UG=Hs.3781 /LL=54674 /DEF=Homo sapiens mRNA; cDNA DKFZp761K2424 (from clone DKFZp761K2424); complete cds. /PROD=hypothetical protein /FL=gb:AL442092.1
SAT1	213988_s_at	4.00001e-07	5.38456e-09	2.31756	1.21261	2.31756	up	2.24627	1.16753	2.24627	up	-0.464193	0.748416	0.703337	6303	Hs.28491	gb:BE971383 /DB_XREF=gi:10584719 /DB_XREF=601651561F1 /CLONE=IMAGE:3934935 /FEA=EST /CNT=19 /TID=Hs.28491.3 /TIER=Stack /STK=17 /UG=Hs.28491 /LL=6303 /UG_GENE=SAT /UG_TITLE=spermidinespermine N1-acetyltransferase
PARP8	219033_at	4.00081e-07	5.40758e-09	2.19544	1.13451	2.19544	up	-1.02778	-0.0395296	1.02778	down	-0.232267	0.902242	-0.271796	79668	Hs.369581	gb:NM_024615.1 /DB_XREF=gi:13375831 /GEN=FLJ21308 /FEA=FLmRNA /CNT=44 /TID=Hs.29977.0 /TIER=FL+Stack /STK=20 /UG=Hs.29977 /LL=79668 /DEF=Homo sapiens hypothetical protein FLJ21308 (FLJ21308), mRNA. /PROD=hypothetical protein FLJ21308 /FL=gb:NM_024615.1
ZNF853	232884_s_at	4.00081e-07	5.4053e-09	-8.32602	-3.05763	8.32602	down	-7.46639	-2.90041	7.46639	down	0.962584	-2.09504	-1.93783	54753	Hs.592170	gb:AL133055.1 /DB_XREF=gi:6453475 /GEN=DKFZp434J1015 /FEA=mRNA /CNT=4 /TID=Hs.283779.0 /TIER=ConsEnd /STK=0 /UG=Hs.283779 /LL=54753 /DEF=Homo sapiens mRNA; cDNA DKFZp434J1015 (from clone DKFZp434J1015). /PROD=hypothetical protein
ZC3H12D	1559263_s_at	4.00081e-07	5.40132e-09	-3.41172	-1.7705	3.41172	down	-3.73881	-1.90258	3.73881	down	0.712165	-1.05833	-1.19041	340152	Hs.632618	gb:BG397809 /DB_XREF=gi:13291257 /DB_XREF=602438895F1 /CLONE=IMAGE:4565207 /TID=Hs2.293216.1 /CNT=5 /FEA=mRNA /TIER=ConsEnd /STK=0 /UG=Hs.293216 /UG_TITLE=Homo sapiens mRNA for FLJ00361 protein.
INPP5E	204706_at	4.06364e-07	5.49994e-09	-2.24181	-1.16466	2.24181	down	-1.75996	-0.81554	1.75996	down	0.319181	-0.845481	-0.496359	56623	Hs.120998	gb:NM_019892.1 /DB_XREF=gi:9845290 /GEN=PPI5PIV /FEA=FLmRNA /CNT=52 /TID=Hs.25156.0 /TIER=FL+Stack /STK=29 /UG=Hs.25156 /LL=56623 /DEF=Homo sapiens phosphatidylinositol (4,5) bisphosphate 5-phosphatase homolog; phosphatidylinositol polyphosphate 5-phosphatase type IV (PPI5PIV), mRNA. /PROD=phosphatidylinositol polyphosphate 5-phosphatasetype IV /FL=gb:NM_019892.1 gb:AF187891.1
NPIPA1	204538_x_at	4.0693e-07	5.51505e-09	-5.19927	-2.37831	5.19927	down	-4.27975	-2.09753	4.27975	down	0.741113	-1.6372	-1.35641	9284	Hs.676266	gb:NM_006985.1 /DB_XREF=gi:5902013 /GEN=NPIP /FEA=FLmRNA /CNT=61 /TID=Hs.251928.0 /TIER=FL+Stack /STK=24 /UG=Hs.251928 /LL=9284 /DEF=Homo sapiens nuclear pore complex interacting protein (NPIP), mRNA. /PROD=nuclear pore complex interacting protein /FL=gb:NM_006985.1 gb:AF132984.1
GPR18	210279_at	4.10356e-07	5.56898e-09	-2.57403	-1.36403	2.57403	down	-4.65563	-2.21898	4.65563	down	0.547972	-0.816056	-1.671	2841	Hs.741589	gb:AF261135.1 /DB_XREF=gi:12005919 /FEA=FLmRNA /CNT=19 /TID=Hs.88269.0 /TIER=FL /STK=2 /UG=Hs.88269 /DEF=Homo sapiens GPR18-iso mRNA, complete cds. /PROD=GPR18-iso /FL=gb:AF261135.1
S100A8	202917_s_at	4.11806e-07	5.5962e-09	1.86687	0.900624	1.86687	up	2.5435	1.34681	2.5435	up	-0.630652	0.269973	0.716163	6279	Hs.416073	gb:NM_002964.2 /DB_XREF=gi:9845519 /GEN=S100A8 /FEA=FLmRNA /CNT=257 /TID=Hs.100000.0 /TIER=FL+Stack /STK=93 /UG=Hs.100000 /LL=6279 /DEF=Homo sapiens S100 calcium-binding protein A8 (calgranulin A) (S100A8), mRNA. /PROD=S100 calcium-binding protein A8 /FL=gb:NM_002964.2
RHOT1	222148_s_at	4.11898e-07	5.60497e-09	1.78202	0.83351	1.78202	up	2.64952	1.40573	2.64952	up	-0.428879	0.40463	0.976851	55288	Hs.655325	gb:BF688108 /DB_XREF=gi:11973516 /DB_XREF=602067332F1 /CLONE=IMAGE:4066422 /FEA=mRNA /CNT=7 /TID=Hs.14202.2 /TIER=ConsEnd /STK=0 /UG=Hs.14202 /LL=55288 /UG_GENE=FLJ11040 /UG_TITLE=hypothetical protein FLJ11040
CKLF///CKLF-CMTM1	219161_s_at	4.12285e-07	5.61779e-09	1.95097	0.96419	1.95097	up	2.71193	1.43932	2.71193	up	-0.406607	0.557583	1.03271	51192///100529251	Hs.15159///Hs.698621	gb:NM_016951.2 /DB_XREF=gi:10092593 /GEN=HSPC224 /FEA=FLmRNA /CNT=42 /TID=Hs.15159.0 /TIER=FL+Stack /STK=25 /UG=Hs.15159 /LL=51192 /DEF=Homo sapiens transmembrane proteolipid (HSPC224), mRNA. /PROD=transmembrane proteolipid /FL=gb:NM_016951.2 gb:BC004380.1 gb:AF151058.1 gb:AF057306.1 gb:AF135380.2
NCR3	211010_s_at	4.21233e-07	5.74773e-09	-8.44778	-3.07857	8.44778	down	-5.83475	-2.54467	5.83475	down	1.83186	-1.24672	-0.712814	259197	Hs.509513	gb:AF031138.1 /DB_XREF=gi:2623876 /FEA=FLmRNA /CNT=5 /TID=Hs.88411.5 /TIER=FL /STK=2 /UG=Hs.88411 /LL=7940 /UG_GENE=LY117 /DEF=Homo sapiens 1C7 precursor, mRNA, alternatively spliced, complete cds. /PROD=1C7 precursor /FL=gb:AF031138.1
LOC100996720///LOC100996740///LOC642441///LOC730257	229872_s_at	4.21233e-07	5.75512e-09	-2.011	-1.00792	2.011	down	-2.25116	-1.17067	2.25116	down	0.42358	-0.584336	-0.747089	642441///730257///100996720///100996740	Hs.730030	gb:AA532655 /DB_XREF=gi:2276909 /DB_XREF=nj17d09.s1 /CLONE=IMAGE:986609 /FEA=EST /CNT=21 /TID=Hs.295901.2 /TIER=Stack /STK=10 /UG=Hs.295901 /LL=57234 /UG_GENE=KIAA0493 /UG_TITLE=KIAA0493 protein
ACSL3	201660_at	4.22355e-07	5.77817e-09	1.89523	0.922374	1.89523	up	3.06338	1.61512	3.06338	up	-0.33384	0.588534	1.28128	2181		gb:AL525798 /DB_XREF=gi:12789291 /DB_XREF=AL525798 /CLONE=CS0DC013YB08 (5 prime) /FEA=FLmRNA /CNT=252 /TID=Hs.268012.0 /TIER=Stack /STK=39 /UG=Hs.268012 /LL=2181 /UG_GENE=FACL3 /UG_TITLE=fatty-acid-Coenzyme A ligase, long-chain 3 /FL=gb:NM_004457.2 gb:AF116690.1 gb:D89053.1
RBMS1	209868_s_at	4.22838e-07	5.79251e-09	2.06298	1.04473	2.06298	up	2.25697	1.17439	2.25697	up	-0.436756	0.607976	0.737633	5937	Hs.470412	gb:D28482.1 /DB_XREF=gi:520588 /GEN=scr2 /FEA=FLmRNA /CNT=91 /TID=Hs.241567.2 /TIER=FL /STK=0 /UG=Hs.241567 /LL=5937 /DEF=Human scr2 mRNA for RNA binding protein SCR2, complete cds. /PROD=SCR2 /FL=gb:NM_016838.1 gb:NM_002897.2 gb:NM_016836.1 gb:D28482.1
ASAP1	224791_at	4.23831e-07	5.81672e-09	1.57596	0.656233	1.57596	up	2.60749	1.38266	2.60749	up	-0.346859	0.309374	1.0358	50807	Hs.655552	gb:AW513835 /DB_XREF=gi:7151913 /DB_XREF=xo49g05.x1 /CLONE=IMAGE:2707352 /FEA=mRNA /CNT=168 /TID=Hs.10669.1 /TIER=Stack /STK=23 /UG=Hs.10669 /LL=50807 /UG_GENE=KIAA1249 /UG_TITLE=KIAA1249 protein
DPY19L3	225633_at	4.23831e-07	5.82162e-09	2.43302	1.28275	2.43302	up	5.03707	2.33258	5.03707	up	-0.394134	0.888617	1.93845	147991	Hs.194392	gb:BF057717 /DB_XREF=gi:10811613 /DB_XREF=7k52e03.x1 /CLONE=IMAGE:3479117 /FEA=mRNA /CNT=71 /TID=Hs.29808.0 /TIER=Stack /STK=21 /UG=Hs.29808 /UG_TITLE=Homo sapiens cDNA: FLJ21122 fis, clone CAS05917
IFNGR1	202727_s_at	4.28553e-07	5.89432e-09	2.50591	1.32533	2.50591	up	3.14391	1.65256	3.14391	up	-0.421199	0.904135	1.23136	3459	Hs.520414	gb:NM_000416.1 /DB_XREF=gi:4557879 /GEN=IFNGR1 /FEA=FLmRNA /CNT=125 /TID=Hs.180866.0 /TIER=FL+Stack /STK=42 /UG=Hs.180866 /LL=3459 /DEF=Homo sapiens interferon gamma receptor 1 (IFNGR1), mRNA. /PROD=interferon gamma receptor 1 /FL=gb:J03143.1 gb:NM_000416.1 gb:BC005333.1
STX3	209238_at	4.34107e-07	5.97865e-09	2.80816	1.48962	2.80816	up	2.32729	1.21865	2.32729	up	-0.321178	1.16844	0.897476	6809	Hs.180711	gb:BE966922 /DB_XREF=gi:11772839 /DB_XREF=601660942R1 /CLONE=IMAGE:3915610 /FEA=FLmRNA /CNT=154 /TID=Hs.82240.0 /TIER=Stack /STK=55 /UG=Hs.82240 /LL=6809 /UG_GENE=STX3A /UG_TITLE=syntaxin 3A /FL=gb:AJ002076.1 gb:U32315.1 gb:NM_004177.1
FLAD1	212541_at	4.34776e-07	5.99581e-09	-1.91843	-0.939926	1.91843	down	-1.38043	-0.465114	1.38043	down	0.241498	-0.698427	-0.223616	80308	Hs.118666	gb:AL562282 /DB_XREF=gi:12910548 /DB_XREF=AL562282 /CLONE=CS0DC003YN02 (3 prime) /FEA=mRNA /CNT=108 /TID=Hs.118666.1 /TIER=Stack /STK=56 /UG=Hs.118666 /LL=80308 /UG_GENE=PP591 /UG_TITLE=hypothetical protein PP591
TLR2	204924_at	4.34921e-07	6.00576e-09	3.53246	1.82067	3.53246	up	2.07122	1.05048	2.07122	up	-0.47318	1.34749	0.577303	7097	Hs.519033	gb:NM_003264.1 /DB_XREF=gi:4507528 /GEN=TLR2 /FEA=FLmRNA /CNT=45 /TID=Hs.63668.0 /TIER=FL+Stack /STK=11 /UG=Hs.63668 /LL=7097 /DEF=Homo sapiens toll-like receptor 2 (TLR2), mRNA. /PROD=toll-like receptor2 /FL=gb:NM_003264.1 gb:U88878.1 gb:AF051152.1
HEBP2	203430_at	4.39261e-07	6.07373e-09	2.05149	1.03668	2.05149	up	2.09604	1.06766	2.09604	up	-0.334941	0.701734	0.732723	23593	Hs.486589	gb:NM_014320.1 /DB_XREF=gi:7657602 /GEN=SOUL /FEA=FLmRNA /CNT=143 /TID=Hs.111029.0 /TIER=FL /STK=0 /UG=Hs.111029 /LL=23593 /DEF=Homo sapiens putative heme-binding protein (SOUL), mRNA. /PROD=putative heme-binding protein /FL=gb:AF117616.1 gb:NM_014320.1
SEC24A	212900_at	4.39933e-07	6.09107e-09	1.25548	0.328238	1.25548	up	3.79072	1.92247	3.79072	up	-0.364679	-0.0364408	1.55779	10802	Hs.595540	gb:AJ131244.1 /DB_XREF=gi:3947687 /FEA=mRNA /CNT=73 /TID=Hs.211612.0 /TIER=ConsEnd /STK=0 /UG=Hs.211612 /LL=10802 /UG_GENE=SEC24A /DEF=Homo sapiens mRNA for Sec24 protein (Sec24A isoform), partial. /PROD=Sec24A protein
HSBP1	200942_s_at	4.42041e-07	6.12834e-09	1.74417	0.802541	1.74417	up	2.65286	1.40755	2.65286	up	-0.419828	0.382713	0.987721	3281	Hs.250899	gb:NM_001537.1 /DB_XREF=gi:4557646 /GEN=HSBP1 /FEA=FLmRNA /CNT=478 /TID=Hs.250899.0 /TIER=FL+Stack /STK=92 /UG=Hs.250899 /LL=3281 /DEF=Homo sapiens heat shock factor binding protein 1 (HSBP1), mRNA. /PROD=heat shock factor binding protein 1 /FL=gb:AF068754.1 gb:NM_001537.1
XK	206698_at	4.43096e-07	6.16728e-09	4.39137	2.13467	4.39137	up	7.10347	2.82852	7.10347	up	-0.994815	1.13986	1.83371	7504	Hs.78919	gb:NM_021083.1 /DB_XREF=gi:10835266 /GEN=XK /FEA=FLmRNA /CNT=21 /TID=Hs.78919.0 /TIER=FL+Stack /STK=11 /UG=Hs.78919 /LL=7504 /DEF=Homo sapiens Kell blood group precursor (McLeod phenotype) (XK), mRNA. /PROD=Kell blood group precursor (McLeod phenotype) /FL=gb:NM_021083.1
SPTAN1	208611_s_at	4.43096e-07	6.16346e-09	-2.48238	-1.31172	2.48238	down	-1.76735	-0.821585	1.76735	down	0.249449	-1.06228	-0.572136	6709	Hs.372331	gb:U83867.1 /DB_XREF=gi:1805279 /FEA=FLmRNA /CNT=412 /TID=Hs.77196.0 /TIER=FL /STK=0 /UG=Hs.77196 /LL=6709 /UG_GENE=SPTAN1 /DEF=Human alpha II spectrin mRNA, complete cds. /PROD=alpha II spectrin /FL=gb:NM_003127.1 gb:J05243.1 gb:U83867.1
LY9	231124_x_at	4.43096e-07	6.1611e-09	-3.09543	-1.63014	3.09543	down	-4.32238	-2.11182	4.32238	down	0.397902	-1.23224	-1.71392	4063	Hs.403857	gb:AI524095 /DB_XREF=gi:4438230 /DB_XREF=th09a05.x1 /CLONE=IMAGE:2117744 /FEA=EST /CNT=13 /TID=Hs.111339.0 /TIER=Stack /STK=10 /UG=Hs.111339 /UG_TITLE=ESTs
PDCL3///PDCL3P4	219043_s_at	4.43126e-07	6.1758e-09	-2.32302	-1.216	2.32302	down	-1.89806	-0.924523	1.89806	down	0.494713	-0.721287	-0.42981	79031///285359	Hs.469459///Hs.720825	gb:NM_024065.1 /DB_XREF=gi:13129043 /GEN=MGC3062 /FEA=FLmRNA /CNT=50 /TID=Hs.94576.0 /TIER=FL+Stack /STK=15 /UG=Hs.94576 /LL=79031 /DEF=Homo sapiens hypothetical protein MGC3062 (MGC3062), mRNA. /PROD=hypothetical protein MGC3062 /FL=gb:BC001021.1 gb:NM_024065.1 gb:AF267853.1
RUNX3	204197_s_at	4.43741e-07	6.20061e-09	-1.87376	-0.905933	1.87376	down	-3.78101	-1.91877	3.78101	down	0.417616	-0.488317	-1.50116	864	Hs.170019	gb:NM_004350.1 /DB_XREF=gi:4757917 /GEN=RUNX3 /FEA=FLmRNA /CNT=114 /TID=Hs.170019.0 /TIER=FL+Stack /STK=22 /UG=Hs.170019 /LL=864 /DEF=Homo sapiens runt-related transcription factor 3 (RUNX3), mRNA. /PROD=runt-related transcription factor 3 /FL=gb:NM_004350.1
APH1B	221036_s_at	4.43741e-07	6.1959e-09	2.55896	1.35556	2.55896	up	1.99812	0.998646	1.99812	up	-0.283993	1.07156	0.714653	83464	Hs.511703	gb:NM_031301.1 /DB_XREF=gi:13775223 /GEN=DKFZP564D0372 /FEA=FLmRNA /CNT=1 /TID=HsAffx.900229.98 /TIER=FL /STK=0 /DEF=Homo sapiens hypothetical protein DKFZp564D0372 (DKFZP564D0372), mRNA. /PROD=hypothetical protein DKFZp564D0372 /FL=gb:NM_031301.1
NSUN7	238983_at	4.45284e-07	6.23032e-09	3.99997	1.99999	3.99997	up	4.53818	2.18211	4.53818	up	-0.671427	1.32856	1.51069	79730	Hs.570821	gb:AI538394 /DB_XREF=gi:4452529 /DB_XREF=tp53f03.x1 /CLONE=IMAGE:2191517 /FEA=EST /CNT=8 /TID=Hs.293514.0 /TIER=ConsEnd /STK=1 /UG=Hs.293514 /UG_TITLE=ESTs
GLUL	215001_s_at	4.47688e-07	6.27213e-09	1.79582	0.844646	1.79582	up	1.75165	0.808717	1.75165	up	-0.193128	0.651518	0.615589	2752	Hs.518525	gb:AL161952.1 /DB_XREF=gi:7328002 /GEN=DKFZp434M0813 /FEA=mRNA /CNT=10 /TID=Hs.170171.1 /TIER=ConsEnd /STK=0 /UG=Hs.170171 /LL=2752 /DEF=Homo sapiens mRNA; cDNA DKFZp434M0813 (from clone DKFZp434M0813); partial cds. /PROD=hypothetical protein
MAPK1	208351_s_at	4.48157e-07	6.28691e-09	2.55179	1.35151	2.55179	up	1.581	0.66084	1.581	up	-0.378395	0.973114	0.282446	5594	Hs.431850	gb:NM_002745.1 /DB_XREF=gi:4506086 /GEN=MAPK1 /FEA=FLmRNA /CNT=1 /TID=Hs.324473.0 /TIER=FL /STK=0 /UG=Hs.324473 /LL=5594 /DEF=Homo sapiens mitogen-activated protein kinase 1 (MAPK1), mRNA. /PROD=mitogen-activated protein kinase 1 /FL=gb:NM_002745.1
GM2A	212737_at	4.49996e-07	6.32916e-09	1.79419	0.843331	1.79419	up	3.07655	1.62131	3.07655	up	-0.543194	0.300138	1.07812	2760	Hs.483873	gb:AL513583 /DB_XREF=gi:12777077 /DB_XREF=AL513583 /CLONE=XCL0BA001ZA05 (3 prime) /FEA=EST /CNT=128 /TID=Hs.278242.3 /TIER=Stack /STK=62 /UG=Hs.278242 /LL=10376 /UG_GENE=K-ALPHA-1 /UG_TITLE=tubulin, alpha, ubiquitous
TRBC1///TRBV19	213193_x_at	4.49996e-07	6.32799e-09	-3.11433	-1.63892	3.11433	down	-5.09358	-2.34868	5.09358	down	0.375924	-1.263	-1.97276	28568///28639	Hs.382212///Hs.449262///Hs.449320///Hs.511720	gb:AL559122 /DB_XREF=gi:12904310 /DB_XREF=AL559122 /CLONE=CS0DJ014YE01 (5 prime) /FEA=mRNA /CNT=75 /TID=Hs.303157.2 /TIER=Stack /STK=31 /UG=Hs.303157 /LL=6957 /UG_GENE=TRB@ /UG_TITLE=T cell receptor beta locus
KCNJ15	210119_at	4.51039e-07	6.35207e-09	2.71291	1.43984	2.71291	up	1.80841	0.854724	1.80841	up	-0.552514	0.887327	0.30221	3772	Hs.411299	gb:U73191.1 /DB_XREF=gi:1765984 /GEN=Kir1.3 /FEA=FLmRNA /CNT=24 /TID=Hs.17287.0 /TIER=FL /STK=0 /UG=Hs.17287 /LL=3772 /DEF=Human inward rectifier potassium channel (Kir1.3), complete cds. /PROD=inward rectifier potassium channel /FL=gb:NM_002243.1 gb:U73191.1
UBXN2B	212934_at	4.55112e-07	6.41777e-09	2.68333	1.42403	2.68333	up	2.15221	1.10582	2.15221	up	-0.362246	1.06178	0.743573	137886	Hs.155572	gb:AI245523 /DB_XREF=gi:3840920 /DB_XREF=qk25c04.x1 /CLONE=IMAGE:1869990 /FEA=mRNA /CNT=72 /TID=Hs.155572.0 /TIER=Stack /STK=28 /UG=Hs.155572 /UG_TITLE=Human clone 23801 mRNA sequence
ASAP1	224796_at	4.5546e-07	6.431e-09	2.55984	1.35605	2.55984	up	2.21592	1.14791	2.21592	up	-0.486177	0.869878	0.66173	50807	Hs.655552	gb:W03103 /DB_XREF=gi:1275081 /DB_XREF=za04b05.r1 /CLONE=IMAGE:291537 /FEA=mRNA /CNT=168 /TID=Hs.10669.1 /TIER=Stack /STK=53 /UG=Hs.10669 /LL=50807 /UG_GENE=KIAA1249 /UG_TITLE=KIAA1249 protein
METTL22	218945_at	4.56434e-07	6.4531e-09	1.46257	0.548503	1.46257	up	2.0548	1.039	2.0548	up	-0.322885	0.225618	0.716112	79091	Hs.306380	gb:NM_024109.1 /DB_XREF=gi:13129121 /GEN=MGC2654 /FEA=FLmRNA /CNT=52 /TID=Hs.165428.0 /TIER=FL /STK=0 /UG=Hs.165428 /LL=79091 /DEF=Homo sapiens hypothetical protein MGC2654 (MGC2654), mRNA. /PROD=hypothetical protein MGC2654 /FL=gb:BC001908.1 gb:NM_024109.1
TMED4	1558487_a_at	4.58334e-07	6.48835e-09	-1.80466	-0.851731	1.80466	down	-1.26234	-0.336099	1.26234	down	0.236595	-0.615136	-0.099504	222068	Hs.598832	gb:AK074557.1 /DB_XREF=gi:22760074 /TID=Hs2.177391.1 /CNT=8 /FEA=mRNA /TIER=ConsEnd /STK=0 /UG=Hs.177391 /UG_TITLE=Homo sapiens cDNA FLJ90076 fis, clone HEMBA1004444, moderately similar to GLYCOPROTEIN 25L PRECURSOR. /DEF=Homo sapiens cDNA FLJ90076 fis, clone HEMBA1004444, moderately similar to GLYCOPROTEIN 25L PRECURSOR.
MMS19	202167_s_at	4.6176e-07	6.54529e-09	-1.62885	-0.70385	1.62885	down	-1.61878	-0.694906	1.61878	down	0.211345	-0.492505	-0.483561	64210	Hs.500721	gb:NM_022362.1 /DB_XREF=gi:13375625 /GEN=MMS19L /FEA=FLmRNA /CNT=197 /TID=Hs.288891.0 /TIER=FL /STK=3 /UG=Hs.288891 /LL=64210 /DEF=Homo sapiens MMS19 (MET18 S. cerevisiae)-like (MMS19L), mRNA. /PROD=MMS19 (MET18 S. cerevisiae)-like /FL=gb:NM_022362.1
ANKRD36B	220940_at	4.64224e-07	6.58871e-09	-2.70833	-1.4374	2.70833	down	-3.38981	-1.7612	3.38981	down	0.721509	-0.715893	-1.0397	57730	Hs.532921	gb:NM_025190.1 /DB_XREF=gi:13449272 /GEN=KIAA1641 /FEA=FLmRNA /CNT=3 /TID=Hs.44566.0 /TIER=FL /STK=0 /UG=Hs.44566 /LL=57730 /DEF=Homo sapiens KIAA1641 protein (KIAA1641), mRNA. /PROD=hypothetical protein FLJ21281 /FL=gb:NM_025190.1
PYGO2	225370_at	4.64854e-07	6.60615e-09	-1.99747	-0.998171	1.99747	down	-1.49793	-0.582969	1.49793	down	0.278937	-0.719234	-0.304032	90780	Hs.533597	gb:AW291388 /DB_XREF=gi:6698108 /DB_XREF=UI-H-BI2-aga-c-07-0-UI.s1 /CLONE=IMAGE:2723700 /FEA=EST /CNT=88 /TID=Hs.172084.0 /TIER=Stack /STK=39 /UG=Hs.172084 /UG_TITLE=ESTs, Weakly similar to T08663 hypothetical protein DKFZp547G0910.1 (H.sapiens)
CD1C	205987_at	4.65875e-07	6.64122e-09	-1.94459	-0.959465	1.94459	down	-3.16503	-1.66222	3.16503	down	0.637428	-0.322037	-1.02479	911	Hs.132448	gb:NM_001765.1 /DB_XREF=gi:4502646 /GEN=CD1C /FEA=FLmRNA /CNT=24 /TID=Hs.1311.0 /TIER=FL+Stack /STK=8 /UG=Hs.1311 /LL=911 /DEF=Homo sapiens CD1C antigen, c polypeptide (CD1C), mRNA. /PROD=CD1C antigen, c polypeptide /FL=gb:NM_001765.1 gb:M28827.1
DBP	209782_s_at	4.65875e-07	6.64623e-09	-2.24732	-1.16821	2.24732	down	-3.01016	-1.58984	3.01016	down	0.471965	-0.696241	-1.11788	1628	Hs.414480///Hs.528006	gb:U79283.1 /DB_XREF=gi:1710256 /FEA=FLmRNA /CNT=56 /TID=Hs.155402.0 /TIER=FL+Stack /STK=11 /UG=Hs.155402 /LL=1628 /UG_GENE=DBP /DEF=Human albumin D-box binding protein mRNA, complete cds. /PROD=albumin D-box binding protein /FL=gb:D28468.1 gb:NM_001352.1 gb:U06936.1 gb:U79283.1
EEF2K///LOC101930123	225546_at	4.65875e-07	6.64507e-09	-1.85989	-0.895218	1.85989	down	-2.19282	-1.13279	2.19282	down	0.335716	-0.559501	-0.797071	29904///101930123	Hs.498892	gb:W68180 /DB_XREF=gi:1377050 /DB_XREF=zd42g04.s1 /CLONE=IMAGE:343350 /FEA=FLmRNA /CNT=70 /TID=Hs.259855.0 /TIER=Stack /STK=10 /UG=Hs.259855 /LL=29904 /UG_GENE=HSU93850 /UG_TITLE=elongation factor-2 kinase /FL=gb:NM_013302.1 gb:U93850.1
ACVR1B	213198_at	4.70884e-07	6.7263e-09	2.24785	1.16855	2.24785	up	2.66269	1.41288	2.66269	up	-0.395747	0.772799	1.01714	91	Hs.438918	gb:AL117643.1 /DB_XREF=gi:5912233 /FEA=mRNA /CNT=63 /TID=Hs.5288.0 /TIER=Stack /STK=47 /UG=Hs.5288 /UG_TITLE=Homo sapiens mRNA; cDNA DKFZp434M245 (from clone DKFZp434M245) /DEF=Homo sapiens mRNA; cDNA DKFZp434M245 (from clone DKFZp434M245).
ZNF567	242429_at	4.72311e-07	6.75532e-09	-3.35287	-1.7454	3.35287	down	-1.81213	-0.85769	1.81213	down	0.552901	-1.1925	-0.304789	163081	Hs.412517	gb:BF435183 /DB_XREF=gi:11447471 /DB_XREF=nab36a02.x1 /CLONE=IMAGE:3267746 /FEA=EST /CNT=6 /TID=Hs.145473.0 /TIER=ConsEnd /STK=2 /UG=Hs.145473 /UG_TITLE=ESTs, Weakly similar to Z11B_HUMAN ZINC FINGER PROTEIN 11B (H.sapiens)
PTEN	225363_at	4.73124e-07	6.78426e-09	2.59304	1.37465	2.59304	up	2.29761	1.20013	2.29761	up	-0.406976	0.967671	0.793159	5728	Hs.500466	gb:AK024986.1 /DB_XREF=gi:10437417 /FEA=mRNA /CNT=91 /TID=Hs.27865.0 /TIER=Stack /STK=50 /UG=Hs.27865 /UG_TITLE=Homo sapiens cDNA: FLJ21333 fis, clone COL02535 /DEF=Homo sapiens cDNA: FLJ21333 fis, clone COL02535.
HPS1	239382_at	4.73124e-07	6.77796e-09	-2.16434	-1.11393	2.16434	down	1.09225	0.127297	1.09225	up	0.0655884	-1.04834	0.192886	3257	Hs.404568	gb:BF059516 /DB_XREF=gi:10813412 /DB_XREF=7k61h01.x1 /CLONE=IMAGE:3480048 /FEA=EST /CNT=6 /TID=Hs.293770.0 /TIER=ConsEnd /STK=4 /UG=Hs.293770 /UG_TITLE=ESTs
	232958_at	4.76586e-07	6.84262e-09	3.42137	1.77457	3.42137	up	4.0043	2.00155	4.0043	up	-1.14153	0.633041	0.86002		Hs.660361	gb:AU157823 /DB_XREF=gi:11019344 /DB_XREF=AU157823 /CLONE=PLACE1009595 /FEA=mRNA /CNT=6 /TID=Hs.60090.0 /TIER=ConsEnd /STK=1 /UG=Hs.60090 /UG_TITLE=Homo sapiens cDNA FLJ13595 fis, clone PLACE1009595
ACSL3	201661_s_at	4.83527e-07	6.95112e-09	2.3955	1.26033	2.3955	up	2.62595	1.39284	2.62595	up	-0.473871	0.786457	0.918968	2181	Hs.655772	gb:NM_004457.2 /DB_XREF=gi:12669907 /GEN=FACL3 /FEA=FLmRNA /CNT=252 /TID=Hs.268012.0 /TIER=FL+Stack /STK=21 /UG=Hs.268012 /LL=2181 /DEF=Homo sapiens fatty-acid-Coenzyme A ligase, long-chain 3 (FACL3), mRNA. /PROD=long-chain fatty-acid-Coenzyme A ligase 3 /FL=gb:NM_004457.2 gb:AF116690.1 gb:D89053.1
SEC22B	214257_s_at	4.87607e-07	7.01869e-09	2.19473	1.13404	2.19473	up	2.01297	1.00933	2.01297	up	-0.392222	0.741819	0.617106	9554	Hs.632438	gb:AA890010 /DB_XREF=gi:3016889 /DB_XREF=aj89h08.s1 /CLONE=IMAGE:1403679 /FEA=EST /CNT=18 /TID=Hs.50785.1 /TIER=Stack /STK=15 /UG=Hs.50785 /LL=9554 /UG_GENE=SEC22L1 /UG_TITLE=SEC22, vesicle trafficking protein (S. cerevisiae)-like 1
ICAM2	213620_s_at	4.91756e-07	7.09427e-09	-2.14778	-1.10285	2.14778	down	-2.41071	-1.26946	2.41071	down	0.41922	-0.683625	-0.85024	3384	Hs.431460	gb:AA126728 /DB_XREF=gi:1686292 /DB_XREF=zk95d07.s1 /CLONE=IMAGE:490573 /FEA=EST /CNT=31 /TID=Hs.83733.1 /TIER=Stack /STK=28 /UG=Hs.83733 /LL=3384 /UG_GENE=ICAM2 /UG_TITLE=intercellular adhesion molecule 2
SPIDR	228325_at	4.91756e-07	7.09639e-09	2.84763	1.50976	2.84763	up	3.89763	1.9626	3.89763	up	-0.510873	0.998889	1.45172	23514	Hs.381058	gb:AI363213 /DB_XREF=gi:4114834 /DB_XREF=qy56a01.x1 /CLONE=IMAGE:2015976 /FEA=EST /CNT=22 /TID=Hs.278634.1 /TIER=Stack /STK=20 /UG=Hs.278634 /LL=23514 /UG_GENE=KIAA0146 /UG_TITLE=KIAA0146 protein
MMP8	207329_at	4.93897e-07	7.13778e-09	17.0236	4.08946	17.0236	up	104.488	6.70719	104.488	up	-1.84822	2.24124	4.85897	4317	Hs.161839	gb:NM_002424.1 /DB_XREF=gi:4505220 /GEN=MMP8 /FEA=FLmRNA /CNT=6 /TID=Hs.73862.0 /TIER=FL /STK=0 /UG=Hs.73862 /LL=4317 /DEF=Homo sapiens matrix metalloproteinase 8 (neutrophil collagenase) (MMP8), mRNA. /PROD=matrix metalloproteinase 8 preproprotein /FL=gb:NM_002424.1 gb:J05556.1
TRIM25	224806_at	4.93897e-07	7.14537e-09	2.6048	1.38117	2.6048	up	2.07143	1.05063	2.07143	up	-0.338431	1.04274	0.712199	7706	Hs.528952	gb:BE563152 /DB_XREF=gi:9806872 /DB_XREF=601335782F1 /CLONE=IMAGE:3689444 /FEA=mRNA /CNT=138 /TID=Hs.10362.0 /TIER=Stack /STK=47 /UG=Hs.10362 /UG_TITLE=Homo sapiens cDNA: FLJ20944 fis, clone ADSE01780
ACSL4	1557418_at	4.95426e-07	7.17654e-09	5.21305	2.38213	5.21305	up	1.54285	0.625599	1.54285	up	-0.697521	1.68461	-0.0719218	2182	Hs.268785	gb:W95007 /DB_XREF=gi:1424176 /DB_XREF=zh46b12.s1 /CLONE=IMAGE:415103 /TID=Hs2.269559.1 /CNT=5 /FEA=mRNA /TIER=ConsEnd /STK=1 /UG=Hs.269559 /UG_TITLE=Homo sapiens cDNA FLJ30069 fis, clone ASTRO1000096.
APH1B	226358_at	4.97046e-07	7.2091e-09	2.12211	1.0855	2.12211	up	1.9998	0.999855	1.9998	up	-0.395938	0.689562	0.603917	83464	Hs.511703	gb:AW237258 /DB_XREF=gi:6569647 /DB_XREF=xm69a05.x1 /CLONE=IMAGE:2689424 /FEA=EST /CNT=57 /TID=Hs.29894.0 /TIER=Stack /STK=31 /UG=Hs.29894 /UG_TITLE=ESTs
SAC3D1	205449_at	5.01916e-07	7.28892e-09	-9.16169	-3.19561	9.16169	down	-1.8566	-0.892665	1.8566	down	0.605216	-2.5904	-0.287449	29901	Hs.23642	gb:NM_013299.1 /DB_XREF=gi:9558738 /GEN=HSU79266 /FEA=FLmRNA /CNT=33 /TID=Hs.23642.0 /TIER=FL+Stack /STK=16 /UG=Hs.23642 /LL=29901 /DEF=Homo sapiens protein predicted by clone 23627 (HSU79266), mRNA. /PROD=protein predicted by clone 23627 /FL=gb:NM_013299.1 gb:U79266.1
SH2D1B	1553177_at	5.0504e-07	7.34351e-09	-1.69735	-0.763285	1.69735	down	-4.94121	-2.30486	4.94121	down	0.48323	-0.280055	-1.82163	117157	Hs.350581	gb:BC022407.1 /DB_XREF=gi:18490408 /TID=Hs2.350581.1 /CNT=11 /FEA=FLmRNA /TIER=FL /STK=1 /LL=117157 /UG_GENE=EAT2 /UG=Hs.350581 /DEF=Homo sapiens, SH2 domain-containing molecule EAT2, clone MGC:24157 IMAGE:4717041, mRNA, complete cds. /PROD=SH2 domain-containing molecule EAT2 /FL=gb:AF484964.1 gb:NM_053282.1 gb:AF256653.1 gb:BC022407.1 gb:AF403479.1
CORO1B///PTPRCAP	204960_at	5.09772e-07	7.42164e-09	-3.33914	-1.73947	3.33914	down	-3.16076	-1.66027	3.16076	down	0.329544	-1.40993	-1.33073	5790///57175	Hs.155975	gb:NM_005608.1 /DB_XREF=gi:5032004 /GEN=PTPRCAP /FEA=FLmRNA /CNT=112 /TID=Hs.155975.0 /TIER=FL+Stack /STK=49 /UG=Hs.155975 /LL=5790 /DEF=Homo sapiens protein tyrosine phosphatase, receptor type, C-associated protein (PTPRCAP), mRNA. /PROD=protein tyrosine phosphatase, receptor type,C-associated protein /FL=gb:NM_005608.1
LDLR	202068_s_at	5.11637e-07	7.45816e-09	1.1879	0.248412	1.1879	up	3.49225	1.80416	3.49225	up	-0.272463	-0.024051	1.53169	3949	Hs.713981	gb:NM_000527.2 /DB_XREF=gi:8051613 /GEN=LDLR /FEA=FLmRNA /CNT=162 /TID=Hs.213289.0 /TIER=FL+Stack /STK=39 /UG=Hs.213289 /LL=3949 /DEF=Homo sapiens low density lipoprotein receptor (familial hypercholesterolemia) (LDLR), mRNA. /PROD=low density lipoprotein receptor precursor /FL=gb:NM_000527.2
MYO5A	204527_at	5.11975e-07	7.47244e-09	1.90613	0.930648	1.90613	up	1.61032	0.687349	1.61032	up	-0.390485	0.540163	0.296864	4644	Hs.21213	gb:NM_000259.1 /DB_XREF=gi:10835118 /GEN=MYO5A /FEA=FLmRNA /CNT=65 /TID=Hs.170157.0 /TIER=FL /STK=7 /UG=Hs.170157 /LL=4644 /DEF=Homo sapiens myosin VA (heavy polypeptide 12, myoxin) (MYO5A), mRNA. /PROD=myosin VA (heavy polypeptide 12, myoxin) /FL=gb:U90942.1 gb:NM_000259.1
PPM1A	203966_s_at	5.12527e-07	7.49256e-09	2.5838	1.36949	2.5838	up	2.51153	1.32857	2.51153	up	-0.897512	0.471982	0.431055	5494	Hs.130036	gb:NM_021003.1 /DB_XREF=gi:10337594 /GEN=PPM1A /FEA=FLmRNA /CNT=64 /TID=Hs.57764.0 /TIER=FL /STK=0 /UG=Hs.57764 /LL=5494 /DEF=Homo sapiens protein phosphatase 1A (formerly 2C), magnesium-dependent, alpha isoform (PPM1A), mRNA. /PROD=protein phosphatase 1A (formerly 2C),magnesium-dependent, alpha isoform /FL=gb:NM_021003.1
WDFY3	212598_at	5.12527e-07	7.49925e-09	5.46286	2.44966	5.46286	up	6.02	2.58976	6.02	up	-1.24204	1.20762	1.34773	23001	Hs.480116	gb:BE348236 /DB_XREF=gi:9260089 /DB_XREF=hw21a12.x1 /CLONE=IMAGE:3183550 /FEA=mRNA /CNT=134 /TID=Hs.198135.0 /TIER=Stack /STK=17 /UG=Hs.198135 /LL=23001 /UG_GENE=KIAA0993 /UG_TITLE=KIAA0993 protein
LOC101928429	242714_at	5.14639e-07	7.53957e-09	1.72776	0.788899	1.72776	up	2.97767	1.57418	2.97767	up	-0.457193	0.331706	1.11699	101928429		gb:AW500340 /DB_XREF=gi:7112861 /DB_XREF=UI-HF-BN0-akg-g-06-0-UI.r1 /CLONE=IMAGE:3077171 /FEA=EST /CNT=6 /TID=Hs.313876.0 /TIER=ConsEnd /STK=0 /UG=Hs.313876 /UG_TITLE=ESTs
	239549_at	5.28976e-07	7.76278e-09	-2.30761	-1.2064	2.30761	down	-7.38502	-2.8846	7.38502	down	0.266354	-0.940044	-2.61825		Hs.656149	gb:BF515158 /DB_XREF=gi:11600425 /DB_XREF=UI-H-BW1-ank-h-12-0-UI.s1 /CLONE=IMAGE:3082631 /FEA=EST /CNT=7 /TID=Hs.16899.0 /TIER=ConsEnd /STK=1 /UG=Hs.16899 /UG_TITLE=ESTs
CLIP1	1558924_s_at	5.28976e-07	7.76896e-09	-1.67109	-0.740786	1.67109	down	1.8266	0.869161	1.8266	up	-0.158428	-0.899214	0.710733	6249	Hs.524809	gb:BF673049 /DB_XREF=gi:11946944 /DB_XREF=602152949F1 /CLONE=IMAGE:4293805 /TID=Hs2.432908.1 /CNT=6 /FEA=mRNA /TIER=ConsEnd /STK=0 /UG=Hs.432908 /UG_TITLE=Homo sapiens cytoplasmic linker protein CLIP-170 mRNA, CLIP(11+35) isoform, partial cds
TRAC	209670_at	5.34622e-07	7.86165e-09	-3.29183	-1.71889	3.29183	down	-6.686	-2.74114	6.686	down	0.485932	-1.23296	-2.25521	28755	Hs.74647	gb:M12959.1 /DB_XREF=gi:338734 /GEN=TCRA /FEA=FLmRNA /CNT=83 /TID=Hs.74647.1 /TIER=FL+Stack /STK=50 /UG=Hs.74647 /LL=6955 /UG_TITLE=Human T-cell receptor active alpha-chain mRNA from JM cell line, complete cds /DEF=Human T-cell receptor active alpha-chain mRNA from JM cell line, complete cds. /FL=gb:M12959.1 gb:M12423.1
ANKRD9	230972_at	5.37658e-07	7.91614e-09	2.25172	1.17103	2.25172	up	4.18526	2.06532	4.18526	up	-0.566068	0.604958	1.49925	122416	Hs.432945	gb:AW194999 /DB_XREF=gi:6473987 /DB_XREF=xn45d08.x1 /CLONE=IMAGE:2696655 /FEA=EST /CNT=9 /TID=Hs.127269.0 /TIER=Stack /STK=9 /UG=Hs.127269 /UG_TITLE=ESTs
DSE	218854_at	5.4373e-07	8.01916e-09	2.1112	1.07806	2.1112	up	3.15438	1.65736	3.15438	up	-0.474861	0.6032	1.1825	29940	Hs.458358	gb:NM_013352.1 /DB_XREF=gi:7019520 /GEN=SART-2 /FEA=FLmRNA /CNT=68 /TID=Hs.58636.0 /TIER=FL /STK=0 /UG=Hs.58636 /LL=29940 /DEF=Homo sapiens squamous cell carcinoma antigen recognized by T cell (SART-2), mRNA. /PROD=squamous cell carcinoma antigen recognized by Tcell /FL=gb:NM_013352.1 gb:AF098066.1
C9orf72	225919_s_at	5.4373e-07	8.02542e-09	2.80289	1.48692	2.80289	up	2.32098	1.21473	2.32098	up	-0.533876	0.953041	0.680857	203228	Hs.493639	gb:AI832598 /DB_XREF=gi:5454578 /DB_XREF=at70e09.x1 /CLONE=IMAGE:2377384 /FEA=EST /CNT=86 /TID=Hs.23607.0 /TIER=Stack /STK=33 /UG=Hs.23607 /LL=55302 /UG_GENE=FLJ11109 /UG_TITLE=hypothetical protein FLJ11109
CD79B	205297_s_at	5.4452e-07	8.04705e-09	-2.37073	-1.24533	2.37073	down	-2.61788	-1.3884	2.61788	down	0.778541	-0.466788	-0.609856	974	Hs.89575	gb:NM_000626.1 /DB_XREF=gi:11038673 /GEN=CD79B /FEA=FLmRNA /CNT=113 /TID=Hs.89575.1 /TIER=FL+Stack /STK=43 /UG=Hs.89575 /LL=974 /DEF=Homo sapiens CD79B antigen (immunoglobulin-associated beta) (CD79B), transcript variant 1, mRNA. /PROD=CD79B antigen, isoform 1 precursor /FL=gb:M80461.1 gb:NM_000626.1 gb:M89957.1
KIAA0391///PSMA6	208805_at	5.46172e-07	8.08145e-09	1.77419	0.827161	1.77419	up	4.10768	2.03832	4.10768	up	-0.542118	0.285043	1.49621	5687///9692	Hs.446260	gb:BC002979.1 /DB_XREF=gi:12804240 /FEA=FLmRNA /CNT=407 /TID=Hs.74077.0 /TIER=FL+Stack /STK=190 /UG=Hs.74077 /LL=5687 /UG_GENE=PSMA6 /DEF=Homo sapiens, proteasome (prosome, macropain) subunit, alpha type 6, clone MGC:2333, mRNA, complete cds. /PROD=proteasome (prosome, macropain) subunit, alphatype 6 /FL=gb:BC002979.1
SNHG12	223773_s_at	5.47198e-07	8.10664e-09	-1.86366	-0.89814	1.86366	down	-1.8175	-0.861956	1.8175	down	0.258205	-0.639936	-0.603751	85028	Hs.632377	gb:AF277181.1 /DB_XREF=gi:12751091 /FEA=FLmRNA /CNT=9 /TID=Hs.40092.0 /TIER=FL /STK=0 /UG=Hs.40092 /DEF=Homo sapiens PNAS-123 mRNA, complete cds. /PROD=PNAS-123 /FL=gb:AF277181.1
CREBRF	225957_at	5.50286e-07	8.17251e-09	3.05187	1.60969	3.05187	up	1.14321	0.19309	1.14321	up	-0.387813	1.22188	-0.194722	153222	Hs.484195	gb:AI307750 /DB_XREF=gi:4002354 /DB_XREF=tb24f10.x1 /CLONE=IMAGE:2055307 /FEA=EST /CNT=92 /TID=Hs.30120.0 /TIER=Stack /STK=24 /UG=Hs.30120 /UG_TITLE=ESTs, Weakly similar to JH0148 nucleolin - rat (R.norvegicus)
METTL9	226220_at	5.50286e-07	8.16639e-09	4.46753	2.15948	4.46753	up	3.7628	1.91181	3.7628	up	-0.638665	1.52081	1.27314	51108	Hs.279583	gb:BE551054 /DB_XREF=gi:9792746 /DB_XREF=7b67h07.x1 /CLONE=IMAGE:3233341 /FEA=EST /CNT=94 /TID=Hs.279583.1 /TIER=Stack /STK=10 /UG=Hs.279583 /LL=51108 /UG_GENE=DREV1 /UG_TITLE=CGI-81 protein
	236796_at	5.52808e-07	8.22698e-09	-2.20701	-1.14209	2.20701	down	-3.80709	-1.92869	3.80709	down	0.507896	-0.634197	-1.42079			gb:AI052447 /DB_XREF=gi:3308438 /DB_XREF=oz07g04.x1 /CLONE=IMAGE:1674678 /FEA=EST /CNT=6 /TID=Hs.118659.0 /TIER=ConsEnd /STK=5 /UG=Hs.118659 /UG_TITLE=ESTs
PPM1K	244011_at	5.52808e-07	8.2302e-09	-2.43381	-1.28321	2.43381	down	-2.15119	-1.10513	2.15119	down	0.400782	-0.882432	-0.704352	152926	Hs.43744	gb:BF507342 /DB_XREF=gi:11590649 /DB_XREF=UI-H-BW1-amx-b-01-0-UI.s1 /CLONE=IMAGE:3071185 /FEA=EST /CNT=4 /TID=Hs.291000.1 /TIER=ConsEnd /STK=3 /UG=Hs.291000 /UG_TITLE=ESTs, Moderately similar to ALU7_HUMAN ALU SUBFAMILY SQ SEQUENCE CONTAMINATION WARNING ENTRY (H.sapiens)
HLA-DRB1///HLA-DRB4///LOC105369230	204670_x_at	5.52937e-07	8.24222e-09	-1.74272	-0.801338	1.74272	down	-3.70201	-1.88831	3.70201	down	0.343741	-0.457597	-1.54457	3123///3126///105369230	Hs.534322///Hs.696211	gb:NM_002125.1 /DB_XREF=gi:4504412 /GEN=HLA-DRB5 /FEA=FLmRNA /CNT=62 /TID=Hs.308026.0 /TIER=FL /STK=1 /UG=Hs.308026 /LL=3127 /DEF=Homo sapiens major histocompatibility complex, class II, DR beta 5 (HLA-DRB5), mRNA. /PROD=major histocompatibility complex, class II, DRbeta 5 /FL=gb:NM_002125.1 gb:M20430.1 gb:M11867.1
RBMS1	207266_x_at	5.58486e-07	8.34538e-09	2.04885	1.03481	2.04885	up	2.33883	1.22579	2.33883	up	-0.336951	0.697862	0.888838	5937	Hs.470412	gb:NM_016837.1 /DB_XREF=gi:8400719 /GEN=RBMS1 /FEA=FLmRNA /CNT=4 /TID=Hs.241567.1 /TIER=FL /STK=0 /UG=Hs.241567 /LL=5937 /DEF=Homo sapiens RNA binding motif, single stranded interacting protein 1 (RBMS1), transcript variant MSSP-3, mRNA. /PROD=RNA binding motif, single stranded interactingprotein 1, isoform e /FL=gb:NM_016837.1
	231697_s_at	5.58486e-07	8.34174e-09	2.03138	1.02246	2.03138	up	3.56681	1.83464	3.56681	up	-0.707486	0.314974	1.12715			gb:AV660825 /DB_XREF=gi:9881839 /DB_XREF=AV660825 /CLONE=GLCGLG03 /FEA=EST /CNT=11 /TID=Hs.79572.1 /TIER=Stack /STK=11 /UG=Hs.79572 /LL=1509 /UG_GENE=CTSD /UG_TITLE=cathepsin D (lysosomal aspartyl protease)
CD81	200675_at	5.60103e-07	8.37978e-09	-3.06614	-1.61642	3.06614	down	-2.71226	-1.4395	2.71226	down	0.395806	-1.22062	-1.04369	975	Hs.54457	gb:NM_004356.1 /DB_XREF=gi:4757943 /GEN=CD81 /FEA=FLmRNA /CNT=484 /TID=Hs.54457.0 /TIER=FL+Stack /STK=252 /UG=Hs.54457 /LL=975 /DEF=Homo sapiens CD81 antigen (target of antiproliferative antibody 1) (CD81), mRNA. /PROD=CD81 antigen (target of antiproliferativeantibody 1) /FL=gb:M33680.1 gb:BC002978.1 gb:NM_004356.1
FKBP5	204560_at	5.61787e-07	8.41525e-09	32.868	5.03861	32.868	up	9.65023	3.27056	9.65023	up	-1.25154	3.78708	2.01903	2289	Hs.407190	gb:NM_004117.1 /DB_XREF=gi:4758383 /GEN=FKBP5 /FEA=FLmRNA /CNT=54 /TID=Hs.7557.0 /TIER=FL /STK=0 /UG=Hs.7557 /LL=2289 /DEF=Homo sapiens FK506-binding protein 5 (FKBP5), mRNA. /PROD=FK506-binding protein 5 /FL=gb:NM_004117.1 gb:U71321.1
BACH2	221234_s_at	5.6258e-07	8.43741e-09	-1.94905	-0.962772	1.94905	down	-2.95126	-1.56133	2.95126	down	0.468578	-0.494193	-1.09275	60468	Hs.269764	gb:NM_021813.1 /DB_XREF=gi:13540489 /GEN=BACH2 /FEA=FLmRNA /CNT=1 /TID=HsAffx.900030.8 /TIER=FL /STK=0 /DEF=Homo sapiens BTB and CNC homology 1, basic leucine zipper transcription factor 2 (BACH2), mRNA. /PROD=BTB and CNC homology 1, basic leucine zippertranscription factor 2 /FL=gb:NM_021813.1
C14orf2	210532_s_at	5.66586e-07	8.50785e-09	1.20061	0.26377	1.20061	up	4.30495	2.106	4.30495	up	-0.492972	-0.229201	1.61302	9556	Hs.109052	gb:AF116639.1 /DB_XREF=gi:7959779 /FEA=FLmRNA /CNT=4 /TID=Hs.109052.1 /TIER=FL /STK=0 /UG=Hs.109052 /LL=9556 /UG_GENE=C14ORF2 /DEF=Homo sapiens PRO1574 mRNA, complete cds. /PROD=PRO1574 /FL=gb:AF116639.1
TBC1D8	204526_s_at	5.70626e-07	8.57896e-09	2.51996	1.3334	2.51996	up	4.22995	2.08064	4.22995	up	-0.492526	0.840877	1.58811	11138	Hs.442657	gb:NM_007063.1 /DB_XREF=gi:5902153 /GEN=VRP /FEA=FLmRNA /CNT=70 /TID=Hs.164170.0 /TIER=FL+Stack /STK=15 /UG=Hs.164170 /LL=11138 /DEF=Homo sapiens vascular Rab-GAPTBC-containing (VRP), mRNA. /PROD=vascular Rab-GAPTBC-containing /FL=gb:NM_007063.1 gb:AB024057.1
OLAH	233126_s_at	5.70777e-07	8.59168e-09	10.5823	3.40358	10.5823	up	17.5145	4.13048	17.5145	up	-1.12082	2.28275	3.00966	55301	Hs.24309	gb:AK001844.1 /DB_XREF=gi:7023363 /FEA=mRNA /CNT=4 /TID=Hs.24309.1 /TIER=ConsEnd /STK=0 /UG=Hs.24309 /LL=55301 /UG_GENE=FLJ11106 /UG_TITLE=hypothetical protein FLJ11106 /DEF=Homo sapiens cDNA FLJ10982 fis, clone PLACE1001692, moderately similar to S-ACYL FATTY ACID SYNTHASE THIOESTERASE, MEDIUM CHAIN (EC 3.1.2.14).
NCL	200610_s_at	5.72807e-07	8.64318e-09	-1.63101	-0.705767	1.63101	down	-2.26644	-1.18043	2.26644	down	0.458443	-0.247324	-0.721982	4691	Hs.79110	gb:NM_005381.1 /DB_XREF=gi:4885510 /GEN=NCL /FEA=FLmRNA /CNT=382 /TID=Hs.79110.0 /TIER=FL+Stack /STK=39 /UG=Hs.79110 /LL=4691 /DEF=Homo sapiens nucleolin (NCL), mRNA. /PROD=nucleolin /FL=gb:NM_005381.1
CAPZA1	208374_s_at	5.72807e-07	8.64032e-09	1.66764	0.737812	1.66764	up	2.62027	1.38972	2.62027	up	-0.358463	0.379349	1.03125	829	Hs.744974	gb:NM_006135.1 /DB_XREF=gi:5453596 /GEN=CAPZA1 /FEA=FLmRNA /CNT=2 /TID=Hs.184270.0 /TIER=FL /STK=0 /UG=Hs.184270 /LL=829 /DEF=Homo sapiens capping protein (actin filament) muscle Z-line, alpha 1 (CAPZA1), mRNA. /PROD=F-actin capping protein alpha-1 subunit /FL=gb:NM_006135.1 gb:U56637.1
KCNJ15	211806_s_at	5.74766e-07	8.68325e-09	3.80711	1.9287	3.80711	up	1.56962	0.650413	1.56962	up	-0.588002	1.3407	0.0624111	3772	Hs.411299	gb:D87291.1 /DB_XREF=gi:1772441 /FEA=FLmRNA /CNT=2 /TID=Hs.17287.1 /TIER=FL /STK=0 /UG=Hs.17287 /LL=3772 /UG_GENE=KCNJ15 /DEF=Human mRNA for inward rectifier potassium channel, complete cds. /PROD=inward rectifier potassium channel /FL=gb:D87291.1
PTPRC	1552480_s_at	5.78811e-07	8.75495e-09	-2.51446	-1.33025	2.51446	down	1.63544	0.709675	1.63544	up	0.000692725	-1.32955	0.710368	5788	Hs.654514	gb:NM_080923.1 /DB_XREF=gi:18641365 /GEN=PTPRC /TID=Hs2.170121.1 /CNT=22 /FEA=FLmRNA /TIER=FL /STK=3 /LL=5788 /UG=Hs.170121 /DEF=Homo sapiens protein tyrosine phosphatase, receptor type, C (PTPRC), transcript variant 4, mRNA. /PROD=protein tyrosine phosphatase, receptor type, C,isoform 4 /FL=gb:NM_080923.1
UBE2F	231948_s_at	5.79623e-07	8.77783e-09	1.72501	0.786606	1.72501	up	3.20721	1.68132	3.20721	up	-0.452238	0.334368	1.22908	140739	Hs.471785	gb:BG171548 /DB_XREF=gi:12678251 /DB_XREF=602320817F1 /CLONE=IMAGE:4423949 /FEA=mRNA /CNT=17 /TID=Hs.289051.1 /TIER=ConsEnd /STK=0 /UG=Hs.289051 /UG_TITLE=Homo sapiens cDNA FLJ13857 fis, clone THYRO1001003, weakly similar to UBIQUITIN-CONJUGATING ENZYME E2-21.2 KD (EC 6.3.2.19)
COX6A1	200925_at	5.8344e-07	8.84631e-09	-1.1004	-0.138034	1.1004	down	1.77298	0.826173	1.77298	up	-0.130563	-0.268597	0.695609	1337	Hs.369624	gb:NM_004373.1 /DB_XREF=gi:10047079 /GEN=COX6A1 /FEA=FLmRNA /CNT=383 /TID=Hs.180714.0 /TIER=FL+Stack /STK=167 /UG=Hs.180714 /LL=1337 /DEF=Homo sapiens cytochrome c oxidase subunit VIa polypeptide 1 (COX6A1), mRNA. /PROD=cytochrome c oxidase subunit VIa polypeptide 1 /FL=gb:NM_004373.1
AGAP4///AGAP5///AGAP9///CTGLF12P	221971_x_at	5.83504e-07	8.86862e-09	-1.46879	-0.554627	1.46879	down	-1.69749	-0.763401	1.69749	down	0.23361	-0.321017	-0.529791	119016///414224///642517///729092	Hs.645346///Hs.651147///Hs.656384	gb:BE672818 /DB_XREF=gi:10033359 /DB_XREF=7d24c01.x1 /CLONE=IMAGE:3248160 /FEA=EST /CNT=20 /TID=Hs.297681.3 /TIER=Stack /STK=12 /UG=Hs.297681 /LL=5265 /UG_GENE=SERPINA1 /UG_TITLE=serine (or cysteine) proteinase inhibitor, clade A (alpha-1 antiproteinase, antitrypsin), member 1
KIAA1147	223162_s_at	5.83504e-07	8.86339e-09	-1.52831	-0.611935	1.52831	down	-2.00799	-1.00575	2.00799	down	0.230732	-0.381202	-0.77502	57189	Hs.521240	gb:AF116707.1 /DB_XREF=gi:7959912 /FEA=FLmRNA /CNT=136 /TID=Hs.12461.0 /TIER=FL+Stack /STK=48 /UG=Hs.12461 /LL=57189 /UG_GENE=LCHN /DEF=Homo sapiens PRO2561 mRNA, complete cds. /PROD=PRO2561 /FL=gb:AF116707.1
	229569_at	5.84698e-07	8.89746e-09	2.80883	1.48997	2.80883	up	4.59928	2.20141	4.59928	up	-0.473173	1.01679	1.72823		Hs.49329	gb:AW572379 /DB_XREF=gi:7237112 /DB_XREF=xq17f11.x2 /CLONE=IMAGE:2750925 /FEA=EST /CNT=17 /TID=Hs.26017.0 /TIER=Stack /STK=16 /UG=Hs.26017 /UG_TITLE=ESTs
NSMCE1	224666_at	5.8845e-07	8.96532e-09	-1.68485	-0.752622	1.68485	down	-1.10128	-0.139176	1.10128	down	0.170383	-0.582239	0.0312065	197370	Hs.284295	gb:AF161451.1 /DB_XREF=gi:6841315 /FEA=mRNA /CNT=154 /TID=Hs.284295.0 /TIER=Stack /STK=58 /UG=Hs.284295 /DEF=Homo sapiens HSPC333 mRNA, partial cds. /PROD=HSPC333
PSEN1	226577_at	5.91608e-07	9.02425e-09	1.76459	0.81933	1.76459	up	1.42857	0.514569	1.42857	up	-0.28004	0.53929	0.234529	5663	Hs.3260	gb:N49844 /DB_XREF=gi:1191010 /DB_XREF=yz08d09.s1 /CLONE=IMAGE:282449 /FEA=EST /CNT=49 /TID=Hs.16648.0 /TIER=Stack /STK=29 /UG=Hs.16648 /UG_TITLE=ESTs
HSP90AB1	200064_at	5.92761e-07	9.05451e-09	-1.6802	-0.748636	1.6802	down	-1.87143	-0.904142	1.87143	down	0.356161	-0.392476	-0.547981	3326	Hs.509736	gb:AF275719.1 /DB_XREF=gi:9082288 /GEN=HSP90BETA /FEA=FLmRNA /CNT=474 /TID=Hs.74335.0 /TIER=FL /STK=0 /UG=Hs.74335 /LL=3326 /DEF=Homo sapiens isolate Liv chaperone protein HSP90 beta (HSP90BETA) mRNA, complete cds. /PROD=chaperone protein HSP90 beta /FL=gb:BC004928.1 gb:NM_007355.1 gb:M16660.1 gb:AF275719.1
ZSCAN18	218312_s_at	5.92761e-07	9.06353e-09	-1.50821	-0.592836	1.50821	down	-2.2082	-1.14287	2.2082	down	0.286113	-0.306723	-0.856759	65982	Hs.235390	gb:NM_023926.1 /DB_XREF=gi:12965194 /GEN=FLJ12895 /FEA=FLmRNA /CNT=99 /TID=Hs.235390.0 /TIER=FL+Stack /STK=46 /UG=Hs.235390 /LL=65982 /DEF=Homo sapiens hypothetical protein FLJ12895 (FLJ12895), mRNA. /PROD=hypothetical protein FLJ12895 /FL=gb:NM_023926.1
CD44	204489_s_at	5.98831e-07	9.16729e-09	1.05154	0.0725055	1.05154	up	2.38909	1.25646	2.38909	up	-0.0955659	-0.0230604	1.1609	960	Hs.502328	gb:NM_000610.1 /DB_XREF=gi:10835162 /GEN=CD44 /FEA=FLmRNA /CNT=56 /TID=Hs.169610.0 /TIER=FL /STK=1 /UG=Hs.169610 /LL=960 /DEF=Homo sapiens CD44 antigen (homing function and Indian blood group system) (CD44), mRNA. /PROD=CD44 antigen (homing function and Indian bloodgroup system) /FL=gb:U40373.1 gb:NM_000610.1 gb:M59040.1 gb:M24915.1
HACD2	227741_at	6.01012e-07	9.21166e-09	-2.45034	-1.29298	2.45034	down	-1.19496	-0.256962	1.19496	down	0.257949	-1.03503	0.000986385	201562	Hs.705480	gb:AI813654 /DB_XREF=gi:5424869 /DB_XREF=wj65c01.x1 /CLONE=IMAGE:2407680 /FEA=EST /CNT=30 /TID=Hs.127478.0 /TIER=Stack /STK=15 /UG=Hs.127478 /UG_TITLE=ESTs, Weakly similar to T32252 hypothetical protein T15B7.2 - Caenorhabditis elegans (C.elegans)
SLC44A1	224595_at	6.01955e-07	9.23714e-09	2.31827	1.21305	2.31827	up	3.07733	1.62168	3.07733	up	-0.769899	0.443148	0.851782	23446	Hs.573495	gb:AK022549.1 /DB_XREF=gi:10434002 /FEA=FLmRNA /CNT=262 /TID=Hs.179902.1 /TIER=Stack /STK=48 /UG=Hs.179902 /LL=63942 /UG_GENE=CTL1 /UG_TITLE=transporter-like protein /DEF=Homo sapiens cDNA FLJ12487 fis, clone NT2RM2000609, highly similar to Homo sapiens CTL1 gene. /FL=gb:NM_022109.1
METTL16	226744_at	6.03137e-07	9.27734e-09	-1.41791	-0.503767	1.41791	down	-1.69399	-0.760427	1.69399	down	0.325657	-0.17811	-0.43477	79066	Hs.632237	gb:BG284386 /DB_XREF=gi:13035282 /DB_XREF=602408501F1 /CLONE=IMAGE:4520352 /FEA=EST /CNT=62 /TID=Hs.25005.0 /TIER=Stack /STK=27 /UG=Hs.25005 /UG_TITLE=ESTs
LOC105372881	1556107_at	6.03137e-07	9.26665e-09	3.7489	1.90647	3.7489	up	2.31113	1.2086	2.31113	up	-0.66027	1.2462	0.54833	105372881		gb:AL832253.1 /DB_XREF=gi:21732800 /TID=Hs2.208623.1 /CNT=9 /FEA=mRNA /TIER=ConsEnd /STK=6 /UG=Hs.208623 /UG_TITLE=Homo sapiens mRNA; cDNA DKFZp667C1617 (from clone DKFZp667C1617) /DEF=Homo sapiens mRNA; cDNA DKFZp667C1617 (from clone DKFZp667C1617).
BCL2A1	205681_at	6.0655e-07	9.34093e-09	3.67447	1.87754	3.67447	up	8.3214	3.05683	8.3214	up	-0.75847	1.11907	2.29836	597	Hs.227817	gb:NM_004049.1 /DB_XREF=gi:4757839 /GEN=BCL2A1 /FEA=FLmRNA /CNT=32 /TID=Hs.227817.0 /TIER=FL+Stack /STK=11 /UG=Hs.227817 /LL=597 /DEF=Homo sapiens BCL2-related protein A1 (BCL2A1), mRNA. /PROD=BCL2-related protein A1 /FL=gb:U27467.1 gb:U29680.1 gb:NM_004049.1
TIMM8B	218357_s_at	6.1092e-07	9.41939e-09	1.10958	0.150007	1.10958	up	3.03396	1.6012	3.03396	up	-0.317462	-0.167454	1.28374	26521	Hs.279915	gb:NM_012459.1 /DB_XREF=gi:6912711 /GEN=TIMM8B /FEA=FLmRNA /CNT=101 /TID=Hs.279915.0 /TIER=FL+Stack /STK=50 /UG=Hs.279915 /LL=26521 /DEF=Homo sapiens translocase of inner mitochondrial membrane 8 (yeast) homolog B (TIMM8B), mRNA. /PROD=translocase of inner mitochondrial membrane 8(yeast) homolog B /FL=gb:NM_012459.1 gb:AF150087.1 gb:AF152350.1
KAT6A	216361_s_at	6.12371e-07	9.46269e-09	-4.51316	-2.17414	4.51316	down	1.13253	0.179548	1.13253	up	-0.0180406	-2.19218	0.161507	7994	Hs.491577	gb:AJ251844.1 /DB_XREF=gi:9368433 /GEN=MOZCBP /FEA=mRNA /CNT=1 /TID=Hs.283860.0 /TIER=ConsEnd /STK=0 /UG=Hs.283860 /DEF=Homo sapiens partial mRNA for MOZCBP chimeric transcript type II. /PROD=MOZCBP
NFKBIZ	223218_s_at	6.12371e-07	9.46417e-09	2.04721	1.03366	2.04721	up	2.82029	1.49584	2.82029	up	-0.609086	0.424571	0.886757	64332	Hs.319171	gb:AB037925.1 /DB_XREF=gi:13516830 /GEN=MAIL /FEA=FLmRNA /CNT=87 /TID=Hs.301183.0 /TIER=FL+Stack /STK=15 /UG=Hs.301183 /UG_TITLE=Homo sapiens MAIL mRNA, complete cds /DEF=Homo sapiens MAIL mRNA, complete cds. /FL=gb:AB037925.1
TTC3	210645_s_at	6.13773e-07	9.49706e-09	-2.2045	-1.14045	2.2045	down	-3.10651	-1.63529	3.10651	down	0.50147	-0.638979	-1.13382	7267	Hs.368214	gb:D83077.1 /DB_XREF=gi:1304131 /FEA=FLmRNA /CNT=3 /TID=Hs.118174.1 /TIER=FL /STK=0 /UG=Hs.118174 /LL=7267 /UG_GENE=TTC3 /DEF=Homo sapiens mRNA for TPRD, complete cds. /PROD=TPRD /FL=gb:D83077.1
RAB10	222980_at	6.14832e-07	9.52469e-09	1.58978	0.668823	1.58978	up	2.60387	1.38065	2.60387	up	-0.381404	0.287419	0.999251	10890	Hs.467960	gb:AL136650.1 /DB_XREF=gi:12052825 /GEN=DKFZp564L1962 /FEA=FLmRNA /CNT=434 /TID=Hs.236494.0 /TIER=FL+Stack /STK=57 /UG=Hs.236494 /LL=10890 /DEF=Homo sapiens mRNA; cDNA DKFZp564L1962 (from clone DKFZp564L1962); complete cds. /PROD=hypothetical protein /FL=gb:BC000896.1 gb:NM_016131.1 gb:AL136650.1 gb:AF297660.1 gb:AF106681.1
	208082_x_at	6.1713e-07	9.57158e-09	1.64198	0.715441	1.64198	up	1.63846	0.712342	1.63846	up	-0.422828	0.292613	0.289514			gb:NM_030757.1 /DB_XREF=gi:13540508 /GEN=MKRN4 /FEA=FLmRNA /CNT=1 /TID=HsAffx.900034.19 /TIER=FL /STK=0 /DEF=Homo sapiens makorin, ring finger protein, 4 (MKRN4), mRNA. /PROD=makorin, ring finger protein, 4 /FL=gb:NM_030757.1
CCR7	206337_at	6.21454e-07	9.65002e-09	-2.44479	-1.28971	2.44479	down	-4.75678	-2.24999	4.75678	down	0.716987	-0.572724	-1.533	1236	Hs.370036	gb:NM_001838.1 /DB_XREF=gi:4502640 /GEN=CCR7 /FEA=FLmRNA /CNT=18 /TID=Hs.1652.0 /TIER=FL /STK=5 /UG=Hs.1652 /LL=1236 /DEF=Homo sapiens chemokine (C-C motif) receptor 7 (CCR7), mRNA. /PROD=chemokine (C-C motif) receptor 7 /FL=gb:NM_001838.1 gb:L08176.1 gb:L31581.1
KCNJ2	206765_at	6.31252e-07	9.8308e-09	2.18398	1.12696	2.18398	up	2.19244	1.13254	2.19244	up	-0.485289	0.64167	0.647248	3759	Hs.1547	gb:AF153820.1 /DB_XREF=gi:8132296 /GEN=KCNJ2 /FEA=FLmRNA /CNT=16 /TID=Hs.1547.0 /TIER=FL /STK=2 /UG=Hs.1547 /LL=3759 /DEF=Homo sapiens inwardly-rectifying potassium channel Kir2.1 (KCNJ2) mRNA, complete cds. /PROD=inwardly-rectifying potassium channel Kir2.1 /FL=gb:U22413.1 gb:AF011904.1 gb:AF153820.1 gb:NM_000891.1 gb:U24055.1 gb:AF021139.1 gb:U16861.1 gb:U12507.1
FNDC3B	225032_at	6.31252e-07	9.8368e-09	2.208	1.14274	2.208	up	3.25136	1.70104	3.25136	up	-0.245846	0.896895	1.4552	64778	Hs.744888	gb:AI141784 /DB_XREF=gi:3649241 /DB_XREF=qa56c10.s1 /CLONE=IMAGE:1690770 /FEA=EST /CNT=122 /TID=Hs.299883.1 /TIER=Stack /STK=53 /UG=Hs.299883 /LL=64778 /UG_GENE=FLJ23399 /UG_TITLE=hypothetical protein FLJ23399
MATN1-AS1	1557558_s_at	6.31252e-07	9.81841e-09	-1.83178	-0.873245	1.83178	down	-2.32059	-1.21449	2.32059	down	0.364503	-0.508742	-0.849988	100129196	Hs.659751	gb:BE675718 /DB_XREF=gi:10036259 /DB_XREF=7f14h04.x1 /CLONE=IMAGE:3294679 /TID=Hs2.406897.1 /CNT=5 /FEA=mRNA /TIER=ConsEnd /STK=1 /UG=Hs.406897 /UG_TITLE=Homo sapiens cDNA FLJ33163 fis, clone UTERU2000541.
ZDHHC2	222730_s_at	6.38177e-07	9.95638e-09	1.87681	0.908282	1.87681	up	2.74683	1.45777	2.74683	up	-0.577718	0.330564	0.880048	51201	Hs.744097	gb:AI814257 /DB_XREF=gi:5425472 /DB_XREF=wj70g12.x1 /CLONE=IMAGE:2408230 /FEA=FLmRNA /CNT=81 /TID=Hs.5943.0 /TIER=Stack /STK=32 /UG=Hs.5943 /LL=51201 /UG_GENE=LOC51201 /UG_TITLE=rec /FL=gb:NM_016353.1 gb:AB023584.1
PRDM5	220792_at	6.39241e-07	9.98467e-09	2.29773	1.20021	2.29773	up	2.80199	1.48645	2.80199	up	-0.454755	0.745453	1.0317	11107	Hs.666782	gb:NM_018699.1 /DB_XREF=gi:8923963 /GEN=PRDM5 /FEA=FLmRNA /CNT=3 /TID=Hs.192867.0 /TIER=FL /STK=0 /UG=Hs.192867 /LL=11107 /DEF=Homo sapiens PR domain containing 5 (PRDM5), mRNA. /PROD=PR domain containing 5 /FL=gb:NM_018699.1 gb:AF272897.1
TRAF5	204352_at	6.43446e-07	1.00621e-08	-2.15688	-1.10895	2.15688	down	-5.04489	-2.33482	5.04489	down	0.634182	-0.474763	-1.70064	7188	Hs.523930	gb:NM_004619.1 /DB_XREF=gi:11321602 /GEN=TRAF5 /FEA=FLmRNA /CNT=71 /TID=Hs.29736.0 /TIER=FL /STK=0 /UG=Hs.29736 /LL=7188 /DEF=Homo sapiens TNF receptor-associated factor 5 (TRAF5), mRNA. /PROD=TNF receptor-associated factor 5 /FL=gb:AB000509.1 gb:NM_004619.1
CAPZA2	201237_at	6.44022e-07	1.00829e-08	1.47525	0.56096	1.47525	up	4.21703	2.07623	4.21703	up	-0.475921	0.0850387	1.6003	830	Hs.446123	gb:AV685920 /DB_XREF=gi:10287783 /DB_XREF=AV685920 /CLONE=GKCEGD05 /FEA=FLmRNA /CNT=401 /TID=Hs.75546.0 /TIER=Stack /STK=33 /UG=Hs.75546 /LL=830 /UG_GENE=CAPZA2 /UG_TITLE=capping protein (actin filament) muscle Z-line, alpha 2 /FL=gb:U03269.1 gb:BC005338.1 gb:NM_006136.1
PPP1R3B	222662_at	6.44814e-07	1.01071e-08	2.75031	1.45959	2.75031	up	2.97504	1.57291	2.97504	up	-0.613334	0.846258	0.959572	79660	Hs.458513	gb:W60806 /DB_XREF=gi:1367631 /DB_XREF=zd27b07.s1 /CLONE=IMAGE:341845 /FEA=FLmRNA /CNT=97 /TID=Hs.28329.0 /TIER=Stack /STK=37 /UG=Hs.28329 /LL=79660 /UG_GENE=FLJ14005 /UG_TITLE=hypothetical protein FLJ14005 /FL=gb:NM_024607.1
LGALS8	208936_x_at	6.46779e-07	1.01595e-08	2.09487	1.06686	2.09487	up	2.0549	1.03907	2.0549	up	-0.216845	0.850018	0.822221	3964	Hs.4082	gb:AF074000.1 /DB_XREF=gi:5577965 /FEA=FLmRNA /CNT=266 /TID=Hs.4082.0 /TIER=FL /STK=0 /UG=Hs.4082 /LL=3964 /UG_GENE=LGALS8 /DEF=Homo sapiens Po66 carbohydrate binding protein mRNA, complete cds. /PROD=Po66 carbohydrate binding protein /FL=gb:AF074000.1 gb:L78132.1 gb:AF342815.1 gb:NM_006499.1
	237441_at	6.46779e-07	1.01616e-08	-1.46323	-0.549159	1.46323	down	-2.38076	-1.25143	2.38076	down	0.242187	-0.306972	-1.00924			gb:AW271626 /DB_XREF=gi:6658656 /DB_XREF=xs16e09.x1 /CLONE=IMAGE:2769832 /FEA=EST /CNT=5 /TID=Hs.42294.0 /TIER=ConsEnd /STK=5 /UG=Hs.42294 /UG_TITLE=ESTs
ARL8B	222442_s_at	6.48698e-07	1.02036e-08	1.88045	0.91108	1.88045	up	2.24536	1.16695	2.24536	up	-0.310843	0.600237	0.856105	55207	Hs.250009	gb:AW055237 /DB_XREF=gi:5920940 /DB_XREF=wz02g04.x1 /CLONE=IMAGE:2556918 /FEA=FLmRNA /CNT=223 /TID=Hs.104222.0 /TIER=Stack /STK=16 /UG=Hs.104222 /LL=55207 /UG_GENE=FLJ10702 /UG_TITLE=hypothetical protein FLJ10702 /FL=gb:NM_018184.1
DDAH2	214909_s_at	6.49958e-07	1.02472e-08	1.4087	0.494367	1.4087	up	5.16971	2.37008	5.16971	up	-0.351229	0.143138	2.01885	23564	Hs.247362	gb:AK026191.1 /DB_XREF=gi:10438961 /FEA=mRNA /CNT=12 /TID=Hs.247362.2 /TIER=ConsEnd /STK=0 /UG=Hs.247362 /LL=23564 /UG_GENE=DDAH2 /UG_TITLE=dimethylarginine dimethylaminohydrolase 2 /DEF=Homo sapiens cDNA: FLJ22538 fis, clone HRC13212, highly similar to AF070667 Homo sapiens NG,NG-dimethylarginine dimethylaminohydrolase homolog mRNA.
MCTP2	220603_s_at	6.49958e-07	1.02389e-08	2.46453	1.30131	2.46453	up	4.01839	2.00662	4.01839	up	-0.408936	0.892375	1.59768	55784	Hs.33368	gb:NM_018349.1 /DB_XREF=gi:8922916 /GEN=FLJ11175 /FEA=FLmRNA /CNT=8 /TID=Hs.33368.0 /TIER=FL /STK=0 /UG=Hs.33368 /LL=55784 /DEF=Homo sapiens hypothetical protein FLJ11175 (FLJ11175), mRNA. /PROD=hypothetical protein FLJ11175 /FL=gb:NM_018349.1
PCYT1A	204210_s_at	6.50788e-07	1.02721e-08	1.68646	0.753998	1.68646	up	2.69275	1.42908	2.69275	up	-0.421703	0.332294	1.00738	5130	Hs.135997	gb:NM_005017.1 /DB_XREF=gi:4826887 /GEN=PCYT1A /FEA=FLmRNA /CNT=68 /TID=Hs.273558.0 /TIER=FL /STK=0 /UG=Hs.273558 /LL=5130 /DEF=Homo sapiens phosphate cytidylyltransferase 1, choline, alpha isoform (PCYT1A), mRNA. /PROD=phosphate cytidylyltransferase 1, choline, alphaisoform /FL=gb:L28957.1 gb:NM_005017.1
GTF3C2	212429_s_at	6.62307e-07	1.04661e-08	-1.22426	-0.291905	1.22426	down	-1.67779	-0.746562	1.67779	down	0.18855	-0.103356	-0.558013	2976	Hs.75782	gb:AW194657 /DB_XREF=gi:6473537 /DB_XREF=xb28b12.x1 /CLONE=IMAGE:2577599 /FEA=mRNA /CNT=130 /TID=Hs.75782.2 /TIER=Stack /STK=65 /UG=Hs.75782 /LL=2976 /UG_GENE=GTF3C2 /UG_TITLE=general transcription factor IIIC, polypeptide 2 (beta subunit, 110kD)
FCGR1B	214511_x_at	6.6511e-07	1.05225e-08	2.86153	1.51679	2.86153	up	6.62809	2.72859	6.62809	up	-0.766008	0.75078	1.96258	2210	Hs.534956	gb:L03419.1 /DB_XREF=gi:182460 /FEA=FLmRNA /CNT=7 /TID=Hs.77424.1 /TIER=FL /STK=2 /UG=Hs.77424 /LL=2209 /UG_GENE=FCGR1A /DEF=Human Fc-gamma receptor I B1 mRNA, complete cds. /PROD=Fc gamma receptor I /FL=gb:L03420.1 gb:L03419.1
RPS6KA5	204633_s_at	6.66132e-07	1.05509e-08	1.18942	0.250255	1.18942	up	-4.42978	-2.14724	4.42978	down	0.169006	0.41926	-1.97823	9252	Hs.510225	gb:AF074393.1 /DB_XREF=gi:3411156 /GEN=MSK1 /FEA=FLmRNA /CNT=59 /TID=Hs.109058.0 /TIER=FL+Stack /STK=13 /UG=Hs.109058 /LL=9252 /DEF=Homo sapiens nuclear mitogen- and stress-activated protein kinase-1 (MSK1) mRNA, complete cds. /PROD=nuclear mitogen- and stress-activated proteinkinase-1 /FL=gb:AF074393.1 gb:AF090421.1 gb:NM_004755.1 gb:AF080000.1
VNN1	1558549_s_at	6.68574e-07	1.06018e-08	5.9201	2.56562	5.9201	up	12.6653	3.6628	12.6653	up	-0.811508	1.75411	2.8513	8876	Hs.12114///Hs.720659	gb:BG120535 /DB_XREF=gi:12614044 /DB_XREF=602346858F1 /CLONE=IMAGE:4441695 /TID=Hs2.379831.1 /CNT=12 /FEA=mRNA /TIER=ConsEnd /STK=0 /UG=Hs.379831 /UG_TITLE=Homo sapiens cDNA FLJ38142 fis, clone D9OST2003108, highly similar to Homo sapiens mRNA for VNN1 protein.
CAPS	226424_at	6.69399e-07	1.06271e-08	-5.57183	-2.47815	5.57183	down	-1.8217	-0.865283	1.8217	down	0.448856	-2.0293	-0.416427	828	Hs.584744	gb:AI683754 /DB_XREF=gi:4893936 /DB_XREF=tw53f02.x1 /CLONE=IMAGE:2263419 /FEA=EST /CNT=66 /TID=Hs.26685.0 /TIER=Stack /STK=26 /UG=Hs.26685 /LL=828 /UG_GENE=CAPS /UG_TITLE=calcyphosine
WSB1	201295_s_at	6.69749e-07	1.06449e-08	6.5117	2.70303	6.5117	up	3.36207	1.74935	3.36207	up	-0.473273	2.22976	1.27608	26118		gb:BF111821 /DB_XREF=gi:10941511 /DB_XREF=7l36a06.x1 /CLONE=IMAGE:3523474 /FEA=FLmRNA /CNT=305 /TID=Hs.187991.0 /TIER=Stack /STK=16 /UG=Hs.187991 /LL=26118 /UG_GENE=DKFZP564A122 /UG_TITLE=DKFZP564A122 protein /FL=gb:NM_015626.1 gb:AF106684.1
KIAA0930	217118_s_at	6.73301e-07	1.07137e-08	1.27227	0.347402	1.27227	up	2.38965	1.2568	2.38965	up	-0.275859	0.0715431	0.98094	23313	Hs.592207	gb:AK025608.1 /DB_XREF=gi:10438177 /FEA=mRNA /CNT=1 /TID=Hs.13255.1 /TIER=ConsEnd /STK=0 /UG=Hs.13255 /LL=23313 /UG_GENE=KIAA0930 /UG_TITLE=KIAA0930 protein /DEF=Homo sapiens cDNA: FLJ21955 fis, clone HEP05265.
EIF4B	211938_at	6.7869e-07	1.08119e-08	-1.65375	-0.725739	1.65375	down	-2.04296	-1.03066	2.04296	down	0.537275	-0.188464	-0.493389	1975	Hs.648394	gb:BF247371 /DB_XREF=gi:11162727 /DB_XREF=601858130F1 /CLONE=IMAGE:4068630 /FEA=EST /CNT=425 /TID=Hs.283330.1 /TIER=Stack /STK=190 /UG=Hs.283330 /LL=55378 /UG_GENE=PRO1843 /UG_TITLE=hypothetical protein PRO1843
HLA-DQB1	212998_x_at	6.92322e-07	1.10797e-08	-2.08383	-1.05924	2.08383	down	-6.98043	-2.80332	6.98043	down	0.664395	-0.394844	-2.13892	3119	Hs.409934	gb:AI583173 /DB_XREF=gi:4569070 /DB_XREF=tq64e04.x1 /CLONE=IMAGE:2213598 /FEA=EST /CNT=76 /TID=Hs.73931.3 /TIER=Stack /STK=32 /UG=Hs.73931 /LL=3119 /UG_GENE=HLA-DQB1 /UG_TITLE=major histocompatibility complex, class II, DQ beta 1
LRG1	228648_at	6.92322e-07	1.1075e-08	2.55199	1.35162	2.55199	up	4.07173	2.02564	4.07173	up	-0.51827	0.833354	1.50737	116844	Hs.655559	gb:AA622495 /DB_XREF=gi:2526371 /DB_XREF=nq59b04.s1 /CLONE=IMAGE:1148143 /FEA=EST /CNT=18 /TID=Hs.10844.0 /TIER=Stack /STK=9 /UG=Hs.10844 /UG_TITLE=ESTs, Highly similar to A2GL_HUMAN LEUCINE-RICH ALPHA-2-GLYCOPROTEIN (H.sapiens)
TET2	235461_at	6.92322e-07	1.10532e-08	-4.89244	-2.29055	4.89244	down	1.30856	0.387976	1.30856	up	0.179388	-2.11117	0.567364	54790	Hs.367639///Hs.706276	gb:BG250414 /DB_XREF=gi:12760230 /DB_XREF=602362567F1 /CLONE=IMAGE:4470905 /FEA=EST /CNT=21 /TID=Hs.132826.0 /TIER=ConsEnd /STK=0 /UG=Hs.132826 /UG_TITLE=ESTs, Highly similar to unnamed protein product (H.sapiens)
	1557835_at	6.92322e-07	1.10599e-08	-1.75043	-0.807712	1.75043	down	-6.39442	-2.67681	6.39442	down	0.333736	-0.473976	-2.34308		Hs.674814	gb:AW474420 /DB_XREF=gi:7044526 /DB_XREF=xs95e11.x1 /CLONE=IMAGE:2777420 /TID=Hs2.350797.1 /CNT=4 /FEA=mRNA /TIER=ConsEnd /STK=1 /UG=Hs.350797 /UG_TITLE=Homo sapiens cDNA FLJ31592 fis, clone NT2RI2002447.
AP5B1	231858_x_at	6.93881e-07	1.113e-08	3.96162	1.98609	3.96162	up	1.46156	0.547508	1.46156	up	-0.401044	1.58505	0.146464	91056	Hs.591957	gb:BC004895.1 /DB_XREF=gi:13436157 /FEA=mRNA /CNT=28 /TID=Hs.124962.0 /TIER=ConsEnd /STK=0 /UG=Hs.124962 /DEF=Homo sapiens, clone IMAGE:3510191, mRNA, partial cds. /PROD=Unknown (protein for IMAGE:3510191)
PROK2	232629_at	6.93881e-07	1.11292e-08	2.74198	1.45522	2.74198	up	3.76545	1.91282	3.76545	up	-0.702868	0.752349	1.20996	60675	Hs.528665	gb:AF182069.1 /DB_XREF=gi:10440991 /GEN=BV8 /FEA=mRNA /CNT=5 /TID=Hs.203181.0 /TIER=ConsEnd /STK=0 /UG=Hs.203181 /LL=60675 /DEF=Homo sapiens Bv8 protein (BV8) mRNA, partial cds. /PROD=Bv8 protein
PLSCR1	202430_s_at	6.94166e-07	1.11473e-08	4.21444	2.07534	4.21444	up	7.31779	2.87141	7.31779	up	-0.79985	1.27549	2.07156	5359	Hs.130759	gb:NM_021105.1 /DB_XREF=gi:10863876 /GEN=PLSCR1 /FEA=FLmRNA /CNT=275 /TID=Hs.198282.0 /TIER=FL+Stack /STK=30 /UG=Hs.198282 /LL=5359 /DEF=Homo sapiens phospholipid scramblase 1 (PLSCR1), mRNA. /PROD=phospholipid scramblase 1 /FL=gb:AB006746.1 gb:NM_021105.1 gb:AF098642.1
PXK	225796_at	7.01869e-07	1.12838e-08	2.30595	1.20536	2.30595	up	2.24199	1.16478	2.24199	up	-0.370732	0.834626	0.794046	54899	Hs.190544	gb:AI684747 /DB_XREF=gi:4896041 /DB_XREF=wa85f11.x1 /CLONE=IMAGE:2302989 /FEA=mRNA /CNT=70 /TID=Hs.77646.0 /TIER=Stack /STK=36 /UG=Hs.77646 /UG_TITLE=Homo sapiens mRNA; cDNA DKFZp761M0223 (from clone DKFZp761M0223)
PHTF1	210191_s_at	7.0293e-07	1.13137e-08	4.21705	2.07623	4.21705	up	3.31273	1.72802	3.31273	up	-0.758927	1.31731	0.969092	10745	Hs.655824	gb:BC002447.1 /DB_XREF=gi:12803264 /FEA=FLmRNA /CNT=14 /TID=Hs.123637.1 /TIER=FL /STK=0 /UG=Hs.123637 /LL=10745 /UG_GENE=PHTF1 /DEF=Homo sapiens, Similar to putative homeodomain transcription factor, clone MGC:1307, mRNA, complete cds. /PROD=Similar to putative homeodomain transcriptionfactor /FL=gb:BC002447.1
BASP1	202391_at	7.04033e-07	1.13444e-08	1.87067	0.903558	1.87067	up	2.51139	1.32849	2.51139	up	-0.397359	0.506198	0.931127	10409	Hs.201641	gb:NM_006317.1 /DB_XREF=gi:5453749 /GEN=BASP1 /FEA=FLmRNA /CNT=228 /TID=Hs.79516.0 /TIER=FL+Stack /STK=47 /UG=Hs.79516 /LL=10409 /DEF=Homo sapiens brain acid-soluble protein 1 (BASP1), mRNA. /PROD=brain acid-soluble protein 1 /FL=gb:AF039656.1 gb:NM_006317.1 gb:BC000518.1
LPCAT2	227889_at	7.09321e-07	1.14425e-08	1.85507	0.891473	1.85507	up	3.27156	1.70998	3.27156	up	-0.517149	0.374324	1.19283	54947	Hs.460857	gb:AI765437 /DB_XREF=gi:5231946 /DB_XREF=wi80a10.x1 /CLONE=IMAGE:2399610 /FEA=EST /CNT=32 /TID=Hs.13359.0 /TIER=Stack /STK=19 /UG=Hs.13359 /UG_TITLE=ESTs
KIF5C	203129_s_at	7.10716e-07	1.1491e-08	-2.71734	-1.44219	2.71734	down	-4.99434	-2.32029	4.99434	down	0.695475	-0.746718	-1.62482	3800	Hs.660699	gb:BF059313 /DB_XREF=gi:10813297 /DB_XREF=7k60c04.x1 /CLONE=IMAGE:3479791 /FEA=FLmRNA /CNT=142 /TID=Hs.6641.0 /TIER=Stack /STK=9 /UG=Hs.6641 /LL=3800 /UG_GENE=KIF5C /UG_TITLE=kinesin family member 5C /FL=gb:NM_004522.1 gb:AB011103.1
ROGDI	218394_at	7.10716e-07	1.14789e-08	-1.00215	-0.00309932	1.00215	down	2.23776	1.16206	2.23776	up	-0.142373	-0.145473	1.01968	79641	Hs.459795	gb:NM_024589.1 /DB_XREF=gi:13375778 /GEN=FLJ22386 /FEA=FLmRNA /CNT=93 /TID=Hs.22795.0 /TIER=FL+Stack /STK=46 /UG=Hs.22795 /LL=79641 /DEF=Homo sapiens hypothetical protein FLJ22386 (FLJ22386), mRNA. /PROD=hypothetical protein FLJ22386 /FL=gb:NM_024589.1 gb:AL136675.1
GDE1	226214_at	7.13134e-07	1.15432e-08	1.55519	0.637087	1.55519	up	1.82364	0.866817	1.82364	up	-0.238808	0.39828	0.628009	51573	Hs.512607	gb:BE677894 /DB_XREF=gi:10038435 /DB_XREF=7f61g03.x1 /CLONE=IMAGE:3299188 /FEA=EST /CNT=52 /TID=Hs.183684.1 /TIER=Stack /STK=27 /UG=Hs.183684 /LL=1982 /UG_GENE=EIF4G2 /UG_TITLE=eukaryotic translation initiation factor 4 gamma, 2
RPL18	200022_at	7.13677e-07	1.15933e-08	-1.54938	-0.631694	1.54938	down	-2.45929	-1.29824	2.45929	down	0.327405	-0.304289	-0.970837	6141	Hs.515517	gb:NM_000979.1 /DB_XREF=gi:4506606 /GEN=RPL18 /FEA=FLmRNA /CNT=479 /TID=Hs.75458.0 /TIER=FL+Stack /STK=312 /UG=Hs.75458 /LL=6141 /DEF=Homo sapiens ribosomal protein L18 (RPL18), mRNA. /PROD=ribosomal protein L18 /FL=gb:BC000374.1 gb:L11566.1 gb:NM_000979.1
CD58	211744_s_at	7.13677e-07	1.15813e-08	3.17487	1.6667	3.17487	up	3.78868	1.92169	3.78868	up	-0.909695	0.757002	1.012	965	Hs.34341	gb:BC005930.1 /DB_XREF=gi:13543544 /FEA=FLmRNA /CNT=1 /TID=HsAffx.900771.975 /TIER=FL /STK=0 /DEF=Homo sapiens, Similar to CD58 antigen, (lymphocyte function-associated antigen 3), clone MGC:14538, mRNA, complete cds. /PROD=Similar to CD58 antigen, (lymphocytefunction-associated antigen 3) /FL=gb:BC005930.1
MRPL51	223086_x_at	7.13677e-07	1.16042e-08	-1.55771	-0.639426	1.55771	down	1.49239	0.577626	1.49239	up	-0.080733	-0.720159	0.496893	51258	Hs.55847	gb:AF151075.1 /DB_XREF=gi:7106871 /FEA=FLmRNA /CNT=136 /TID=Hs.55847.0 /TIER=FL+Stack /STK=67 /UG=Hs.55847 /LL=51258 /UG_GENE=LOC51258 /DEF=Homo sapiens HSPC241 mRNA, complete cds. /PROD=HSPC241 /FL=gb:AF212248.1 gb:NM_016497.1 gb:BC000191.1 gb:AF151075.1
TRAPPC5	225870_s_at	7.13677e-07	1.15763e-08	1.41305	0.498815	1.41305	up	1.8895	0.918003	1.8895	up	-0.330007	0.168808	0.587996	126003	Hs.432413	gb:BF569208 /DB_XREF=gi:11642691 /DB_XREF=602185565F1 /CLONE=IMAGE:4309912 /FEA=EST /CNT=56 /TID=Hs.108082.0 /TIER=Stack /STK=38 /UG=Hs.108082 /UG_TITLE=ESTs, Weakly similar to T31636 hypothetical protein Y57A10A.n - Caenorhabditis elegans (C.elegans)
WIPI1	203827_at	7.15932e-07	1.1654e-08	2.59544	1.37598	2.59544	up	3.04224	1.60513	3.04224	up	-0.3075	1.06848	1.29763	55062	Hs.463964	gb:NM_017983.1 /DB_XREF=gi:8922207 /GEN=FLJ10055 /FEA=FLmRNA /CNT=79 /TID=Hs.9398.0 /TIER=FL+Stack /STK=34 /UG=Hs.9398 /LL=55062 /DEF=Homo sapiens hypothetical protein FLJ10055 (FLJ10055), mRNA. /PROD=hypothetical protein FLJ10055 /FL=gb:NM_017983.1
ATP11B	1554556_a_at	7.17002e-07	1.16845e-08	2.54222	1.34609	2.54222	up	7.7918	2.96196	7.7918	up	-0.941726	0.404364	2.02023	23200	Hs.478429	gb:BC033880.1 /DB_XREF=gi:21707507 /TID=Hs2.75478.1 /CNT=10 /FEA=FLmRNA /TIER=FL /STK=1 /LL=23200 /UG_GENE=ATP11B /UG=Hs.75478 /DEF=Homo sapiens, Similar to RIKEN cDNA 1110019I14 gene, clone MGC:46260 IMAGE:5548541, mRNA, complete cds. /PROD=Similar to RIKEN cDNA 1110019I14 gene /FL=gb:BC033880.1
MCTP1	235740_at	7.2178e-07	1.17755e-08	2.36459	1.24159	2.36459	up	4.01851	2.00666	4.01851	up	-0.57507	0.666518	1.43159	79772	Hs.655087	gb:BG250585 /DB_XREF=gi:12760401 /DB_XREF=602362764F1 /CLONE=IMAGE:4471166 /FEA=EST /CNT=9 /TID=Hs.151489.0 /TIER=ConsEnd /STK=6 /UG=Hs.151489 /UG_TITLE=ESTs
FBXO31	224162_s_at	7.29407e-07	1.19133e-08	-4.29086	-2.10127	4.29086	down	-6.60558	-2.72369	6.60558	down	0.795061	-1.30621	-1.92862	79791	Hs.567582	gb:BC002985.1 /DB_XREF=gi:12804252 /FEA=FLmRNA /CNT=2 /TID=Hs.7970.0 /TIER=FL /STK=0 /UG=Hs.7970 /LL=25990 /UG_GENE=DKFZP434B027 /DEF=Homo sapiens, clone MGC:2660, mRNA, complete cds. /PROD=Unknown (protein for MGC:2660) /FL=gb:BC002985.1
HMCES	201677_at	7.35423e-07	1.20385e-08	-1.856	-0.892199	1.856	down	-3.07079	-1.61861	3.07079	down	0.293759	-0.59844	-1.32485	56941		gb:AI937543 /DB_XREF=gi:5676413 /DB_XREF=wp78f01.x1 /CLONE=IMAGE:2467897 /FEA=FLmRNA /CNT=209 /TID=Hs.110480.0 /TIER=Stack /STK=42 /UG=Hs.110480 /LL=56941 /UG_GENE=DC12 /UG_TITLE=DC12 protein /FL=gb:NM_020187.1 gb:AF201934.1
CEACAM1	209498_at	7.35423e-07	1.20302e-08	2.83143	1.50153	2.83143	up	7.38203	2.88402	7.38203	up	-0.387599	1.11393	2.49642	634	Hs.512682	gb:X16354.1 /DB_XREF=gi:37197 /FEA=FLmRNA /CNT=94 /TID=Hs.50964.3 /TIER=Stack /STK=39 /UG=Hs.50964 /LL=634 /UG_GENE=CEACAM1 /DEF=Human mRNA for transmembrane carcinoembryonic antigen BGPa (formerly TM1-CEA). /PROD=TM1-CEA preprotein /FL=gb:J03858.1
LOC441259///PMS2P1///PMS2P10///PMS2P2///PMS2P5///PMS2P6///PMS2P7	215667_x_at	7.39971e-07	1.21265e-08	-1.69184	-0.758596	1.69184	down	-1.39608	-0.481387	1.39608	down	0.258069	-0.500527	-0.223318	5379///5380///5383///441259///729453///100101440///100288713		gb:AI375694 /DB_XREF=gi:4175684 /DB_XREF=ta58f12.x1 /CLONE=IMAGE:2048303 /FEA=mRNA /CNT=3 /TID=Hs.323954.5 /TIER=ConsEnd /STK=1 /UG=Hs.323954 /LL=5386 /UG_GENE=PMS2L8 /UG_TITLE=postmeiotic segregation increased 2-like 8
ITCH	217094_s_at	7.43082e-07	1.2191e-08	2.02172	1.01558	2.02172	up	1.71982	0.782254	1.71982	up	-0.394112	0.621473	0.388142	83737	Hs.632272	gb:AL109923 /DB_XREF=gi:8894632 /FEA=DNA /CNT=1 /TID=Hs.98074.1 /TIER=ConsEnd /STK=0 /UG=Hs.98074 /LL=11058 /UG_GENE=AIP4 /UG_TITLE=atrophin-1 interacting protein 4 /DEF=Human DNA sequence from clone RP3-468O1 on chromosome 20 Contains ESTs, STSs, GSSs and CpG islands. Contains a gene for the atrophin 1 interacting protein 4 (AIP4), a ferredoxin 1 (FDX1) pseudogene and part of a gene for an ortho…
JAK2	1562031_at	7.4366e-07	1.22141e-08	3.37067	1.75304	3.37067	up	3.24944	1.70019	3.24944	up	-0.706851	1.04618	0.99334	3717		gb:BC043187.1 /DB_XREF=gi:27693252 /TID=Hs2.438487.1 /CNT=3 /FEA=mRNA /TIER=ConsEnd /STK=0 /UG=Hs.438487 /UG_TITLE=Homo sapiens, clone IMAGE:5288207, mRNA /DEF=Homo sapiens, clone IMAGE:5288207, mRNA.
ARMCX2	203404_at	7.44408e-07	1.22525e-08	-3.10053	-1.63251	3.10053	down	-7.37674	-2.88298	7.37674	down	0.754531	-0.877984	-2.12845	9823	Hs.48924	gb:NM_014782.1 /DB_XREF=gi:7662161 /GEN=KIAA0512 /FEA=FLmRNA /CNT=95 /TID=Hs.48924.0 /TIER=FL /STK=3 /UG=Hs.48924 /LL=9823 /DEF=Homo sapiens KIAA0512 gene product (KIAA0512), mRNA. /PROD=KIAA0512 gene product /FL=gb:NM_014782.1 gb:AB011084.1
	210598_at	7.44408e-07	1.22536e-08	2.55858	1.35534	2.55858	up	1.11204	0.153202	1.11204	up	-0.190615	1.16473	-0.0374129			gb:AF130051.1 /DB_XREF=gi:11493408 /FEA=FLmRNA /CNT=4 /TID=Hs.306960.0 /TIER=FL /STK=0 /UG=Hs.306960 /DEF=Homo sapiens clone FLB3535 PRO0898 mRNA, complete cds. /PROD=PRO0898 /FL=gb:AF130051.1
CEP295	1569302_at	7.49544e-07	1.23519e-08	-1.63398	-0.708387	1.63398	down	-1.10062	-0.138322	1.10062	down	0.156302	-0.552085	0.0179796	85459	Hs.458418	gb:BC017394.1 /DB_XREF=gi:16924241 /TID=Hs2.407236.1 /CNT=5 /FEA=mRNA /TIER=ConsEnd /STK=0 /UG=Hs.407236 /UG_TITLE=Homo sapiens, Similar to testis specific protein, Ddc8, clone IMAGE:4066977, mRNA /DEF=Homo sapiens, Similar to testis specific protein, Ddc8, clone IMAGE:4066977, mRNA.
LPCAT2	222833_at	7.56409e-07	1.24788e-08	2.92628	1.54907	2.92628	up	4.3364	2.1165	4.3364	up	-0.688006	0.861062	1.42849	54947	Hs.460857	gb:AU154202 /DB_XREF=gi:11015723 /DB_XREF=AU154202 /CLONE=NT2RP4000424 /FEA=FLmRNA /CNT=50 /TID=Hs.102500.0 /TIER=Stack /STK=8 /UG=Hs.102500 /LL=54947 /UG_GENE=FLJ20481 /UG_TITLE=hypothetical protein FLJ20481 /FL=gb:BC002472.1 gb:NM_017839.1
ITPKB	203723_at	7.57284e-07	1.25071e-08	-1.765	-0.81967	1.765	down	-2.49716	-1.32029	2.49716	down	0.515822	-0.303847	-0.804465	3707	Hs.528087	gb:NM_002221.1 /DB_XREF=gi:4504790 /GEN=ITPKB /FEA=FLmRNA /CNT=91 /TID=Hs.78877.0 /TIER=FL+Stack /STK=31 /UG=Hs.78877 /LL=3707 /DEF=Homo sapiens inositol 1,4,5-trisphosphate 3-kinase B (ITPKB), mRNA. /PROD=1D-myo-inositol-trisphosphate 3-kinase B /FL=gb:NM_002221.1
NAP1L1	208752_x_at	7.59809e-07	1.25627e-08	-2.08742	-1.06172	2.08742	down	-1.74682	-0.804731	1.74682	down	0.316362	-0.745358	-0.48837	4673	Hs.524599	gb:AI888672 /DB_XREF=gi:5593836 /DB_XREF=wn34c03.x1 /CLONE=IMAGE:2447332 /FEA=FLmRNA /CNT=329 /TID=Hs.179662.1 /TIER=Stack /STK=12 /UG=Hs.179662 /LL=4673 /UG_GENE=NAP1L1 /UG_TITLE=nucleosome assembly protein 1-like 1 /FL=gb:AL162068.1 gb:BC002387.1
FBXO38	221257_x_at	7.64034e-07	1.26466e-08	1.98898	0.992029	1.98898	up	2.0544	1.03872	2.0544	up	-0.354514	0.637516	0.684206	81545	Hs.483772	gb:NM_030793.1 /DB_XREF=gi:13540573 /GEN=SP329 /FEA=FLmRNA /CNT=1 /TID=HsAffx.900065.127 /TIER=FL /STK=0 /DEF=Homo sapiens hypothetical protein SP329 (SP329), mRNA. /PROD=hypothetical protein SP329 /FL=gb:NM_030793.1
GALNS	206335_at	7.64803e-07	1.26733e-08	1.86308	0.897689	1.86308	up	1.45002	0.536069	1.45002	up	-0.302142	0.595547	0.233927	2588	Hs.271383	gb:NM_000512.2 /DB_XREF=gi:9945384 /GEN=GALNS /FEA=FLmRNA /CNT=14 /TID=Hs.159479.0 /TIER=FL /STK=1 /UG=Hs.159479 /LL=2588 /DEF=Homo sapiens galactosamine (N-acetyl)-6-sulfate sulfatase (Morquio syndrome, mucopolysaccharidosis type IVA) (GALNS), mRNA. /PROD=N-acetylgalactosamine-6-sulfatase precursor /FL=gb:NM_000512.2
GSR	225609_at	7.67151e-07	1.27262e-08	1.54442	0.627069	1.54442	up	3.17015	1.66455	3.17015	up	-0.395747	0.231323	1.2688	2936	Hs.271510	gb:AI888037 /DB_XREF=gi:5593201 /DB_XREF=wm27f04.x1 /CLONE=IMAGE:2437183 /FEA=EST /CNT=76 /TID=Hs.193974.0 /TIER=Stack /STK=51 /UG=Hs.193974 /UG_TITLE=ESTs, Weakly similar to ALU1_HUMAN ALU SUBFAMILY J SEQUENCE CONTAMINATION WARNING ENTRY (H.sapiens)
NELFCD	225865_x_at	7.68365e-07	1.27604e-08	-1.90889	-0.932733	1.90889	down	-2.07156	-1.05072	2.07156	down	0.403939	-0.528795	-0.646781	51497	Hs.517148	gb:AJ238374.1 /DB_XREF=gi:6634418 /GEN=TH1 /FEA=mRNA /CNT=66 /TID=Hs.5184.3 /TIER=Stack /STK=42 /UG=Hs.5184 /LL=51497 /DEF=Homo sapiens mRNA for putative protein TH1, partial, clone IMAGE ID 785447. /PROD=putative protein TH1
SYNE1	232027_at	7.79697e-07	1.29629e-08	4.95362	2.30848	4.95362	up	4.1042	2.0371	4.1042	up	-0.989564	1.31892	1.04754	23345		gb:AL049548 /DB_XREF=gi:4902741 /FEA=mRNA /CNT=20 /TID=Hs.241420.0 /TIER=ConsEnd /STK=0 /UG=Hs.241420 /UG_TITLE=Homo sapiens mRNA for KIAA1756 protein, partial cds /DEF=Human DNA sequence from clone 398G3 on chromosome 6q25.1-25.3. Contains the 3part of the gene for the ortholog of rat CPG2, part of a novel gene, ESTs, STSs and GSSs
TPST2	235761_at	7.81288e-07	1.30036e-08	-1.75645	-0.812664	1.75645	down	2.26938	1.1823	2.26938	up	-0.00625355	-0.818918	1.17604	8459	Hs.167167	gb:BG111808 /DB_XREF=gi:12605314 /DB_XREF=602283404F1 /CLONE=IMAGE:4370736 /FEA=EST /CNT=9 /TID=Hs.167167.0 /TIER=ConsEnd /STK=0 /UG=Hs.167167 /UG_TITLE=ESTs
RAB20	219622_at	7.85243e-07	1.30888e-08	2.15429	1.10722	2.15429	up	2.69904	1.43245	2.69904	up	-0.430895	0.676321	1.00155	55647	Hs.743563	gb:NM_017817.1 /DB_XREF=gi:8923400 /GEN=FLJ20429 /FEA=FLmRNA /CNT=29 /TID=Hs.179791.0 /TIER=FL /STK=0 /UG=Hs.179791 /LL=55647 /DEF=Homo sapiens hypothetical protein FLJ20429 (FLJ20429), mRNA. /PROD=hypothetical protein FLJ20429 /FL=gb:NM_017817.1
TNFAIP8L1	227420_at	7.85243e-07	1.30982e-08	-2.6705	-1.41711	2.6705	down	-2.33336	-1.22241	2.33336	down	0.331753	-1.08536	-0.890655	126282	Hs.465643	gb:BF338045 /DB_XREF=gi:11284443 /DB_XREF=602035933F1 /CLONE=IMAGE:4183592 /FEA=EST /CNT=38 /TID=Hs.7753.1 /TIER=Stack /STK=24 /UG=Hs.7753 /LL=813 /UG_GENE=CALU /UG_TITLE=calumenin
MARK3	232537_x_at	7.8768e-07	1.31532e-08	2.7118	1.43925	2.7118	up	1.28079	0.357031	1.28079	up	-0.418539	1.02071	-0.0615081	4140	Hs.35828	gb:AU159474 /DB_XREF=gi:11020995 /DB_XREF=AU159474 /CLONE=THYRO1001772 /FEA=mRNA /CNT=7 /TID=Hs.272128.0 /TIER=ConsEnd /STK=3 /UG=Hs.272128 /UG_TITLE=Homo sapiens cDNA FLJ13901 fis, clone THYRO1001772
UGCG	224967_at	7.87895e-07	1.31712e-08	3.97753	1.99187	3.97753	up	7.72808	2.95011	7.72808	up	-0.537947	1.45392	2.41216	7357	Hs.304249///Hs.593014	gb:W72338 /DB_XREF=gi:1382943 /DB_XREF=zd62a08.s1 /CLONE=IMAGE:345206 /FEA=EST /CNT=145 /TID=Hs.23703.0 /TIER=Stack /STK=54 /UG=Hs.23703 /UG_TITLE=ESTs
	240941_at	7.8832e-07	1.31927e-08	-2.16892	-1.11698	2.16892	down	1.58029	0.660192	1.58029	up	0.115194	-1.00178	0.775386			gb:BF222862 /DB_XREF=gi:11130039 /DB_XREF=7q24c08.x1 /CLONE=IMAGE:3699087 /FEA=EST /CNT=5 /TID=Hs.211375.0 /TIER=ConsEnd /STK=4 /UG=Hs.211375 /UG_TITLE=ESTs
ZNF329	219765_at	7.92837e-07	1.32828e-08	-2.40483	-1.26593	2.40483	down	-2.93025	-1.55102	2.93025	down	0.729237	-0.536698	-0.821787	79673	Hs.458377	gb:NM_024620.1 /DB_XREF=gi:13375841 /GEN=FLJ12586 /FEA=FLmRNA /CNT=26 /TID=Hs.31844.0 /TIER=FL+Stack /STK=8 /UG=Hs.31844 /LL=79673 /DEF=Homo sapiens hypothetical protein FLJ12586 (FLJ12586), mRNA. /PROD=hypothetical protein FLJ12586 /FL=gb:NM_024620.1
ELP2	230178_s_at	7.97971e-07	1.33834e-08	-1.77433	-0.827273	1.77433	down	-2.45872	-1.29791	2.45872	down	0.530104	-0.29717	-0.767804	55250	Hs.606040	gb:BE672676 /DB_XREF=gi:10033217 /DB_XREF=7b71c11.x1 /CLONE=IMAGE:3233684 /FEA=EST /CNT=13 /TID=Hs.134981.0 /TIER=Stack /STK=12 /UG=Hs.134981 /UG_TITLE=ESTs
DPH3	225195_at	7.9882e-07	1.34292e-08	1.55814	0.639828	1.55814	up	2.67501	1.41955	2.67501	up	-0.314344	0.325483	1.1052	285381	Hs.388087	gb:AI825858 /DB_XREF=gi:5446529 /DB_XREF=td19d10.x1 /CLONE=IMAGE:2076115 /FEA=mRNA /CNT=112 /TID=Hs.264915.0 /TIER=Stack /STK=22 /UG=Hs.264915 /UG_TITLE=Homo sapiens cDNA FLJ12908 fis, clone NT2RP2004399
	239673_at	7.9882e-07	1.34362e-08	-2.84181	-1.50681	2.84181	down	-4.45607	-2.15577	4.45607	down	0.500192	-1.00662	-1.65558		Hs.664073	gb:AW080999 /DB_XREF=gi:6036151 /DB_XREF=xc39a09.x1 /CLONE=IMAGE:2586616 /FEA=EST /CNT=7 /TID=Hs.163924.0 /TIER=ConsEnd /STK=0 /UG=Hs.163924 /UG_TITLE=ESTs
ERCC6L2	1559589_a_at	7.9882e-07	1.34415e-08	-2.38251	-1.25248	2.38251	down	1.18193	0.241149	1.18193	up	0.124212	-1.12827	0.365361	375748	Hs.669289	gb:BU568278 /DB_XREF=gi:22918578 /DB_XREF=AGENCOURT_10404862 /CLONE=IMAGE:6615294 /TID=Hs2.150158.1 /CNT=5 /FEA=mRNA /TIER=ConsEnd /STK=0 /UG=Hs.150158 /UG_TITLE=Homo sapiens cDNA FLJ37400 fis, clone BRAMY2027714.
	241344_at	8.00993e-07	1.34927e-08	1.15294	0.20532	1.15294	up	1.91706	0.938899	1.91706	up	-0.115458	0.0898627	0.823441			gb:AI821780 /DB_XREF=gi:5440859 /DB_XREF=ag70h11.x5 /CLONE=IMAGE:1128357 /FEA=EST /CNT=15 /TID=Hs.179864.0 /TIER=ConsEnd /STK=0 /UG=Hs.179864 /UG_TITLE=ESTs
COL4A3BP	223465_at	8.01749e-07	1.35201e-08	1.09171	0.126584	1.09171	up	3.26061	1.70514	3.26061	up	-0.262346	-0.135762	1.4428	10087	Hs.270437	gb:BE967275 /DB_XREF=gi:11773366 /DB_XREF=601661144R1 /CLONE=IMAGE:3916067 /FEA=FLmRNA /CNT=52 /TID=Hs.21276.1 /TIER=Stack /STK=22 /UG=Hs.21276 /LL=10087 /UG_GENE=COL4A3BP /UG_TITLE=collagen, type IV, alpha 3 (Goodpasture antigen) binding protein /FL=gb:BC000102.1 gb:AF232930.1
VAPB	202549_at	8.11734e-07	1.37182e-08	-7.56317	-2.91899	7.56317	down	-1.65936	-0.730625	1.65936	down	0.141286	-2.7777	-0.589339	9217	Hs.182625	gb:AK025720.1 /DB_XREF=gi:10438329 /FEA=FLmRNA /CNT=196 /TID=Hs.182625.0 /TIER=Stack /STK=8 /UG=Hs.182625 /LL=9217 /UG_GENE=VAPB /UG_TITLE=VAMP (vesicle-associated membrane protein)-associated protein B and C /DEF=Homo sapiens cDNA: FLJ22067 fis, clone HEP11115F, highly similar to AF086629 Homo sapiens VAMP-associated protein C (VAP-C) mRNA. /FL=gb:BC001712.1 gb:AF086628.1 gb:NM_004738.1 gb:AF160…
BCL11B	222895_s_at	8.11734e-07	1.37157e-08	-2.27378	-1.18509	2.27378	down	-5.22632	-2.38579	5.22632	down	0.490047	-0.695046	-1.89575	64919	Hs.709690	gb:AA918317 /DB_XREF=gi:3058207 /DB_XREF=ol42c06.s1 /CLONE=IMAGE:1526122 /FEA=FLmRNA /CNT=37 /TID=Hs.57987.0 /TIER=Stack /STK=10 /UG=Hs.57987 /LL=64919 /UG_GENE=BCL11B /UG_TITLE=B-cell CLLlymphoma 11B (zinc finger protein) /FL=gb:NM_022898.1
C21orf33///LOC102724023	202217_at	8.13273e-07	1.37591e-08	-1.85799	-0.893739	1.85799	down	-2.10481	-1.07369	2.10481	down	0.527426	-0.366313	-0.546261	8209///102724023	Hs.413482	gb:NM_004649.1 /DB_XREF=gi:5031690 /GEN=C21ORF33 /FEA=FLmRNA /CNT=204 /TID=Hs.182423.0 /TIER=FL+Stack /STK=62 /UG=Hs.182423 /LL=8209 /DEF=Homo sapiens ES1 (zebrafish) protein, human homolog of (C21ORF33), mRNA. /PROD=ES1 (zebrafish) protein, human homolog of /FL=gb:BC002370.1 gb:U53003.1 gb:D86061.1 gb:NM_004649.1 gb:BC003587.1
IFNGR1	211676_s_at	8.13286e-07	1.37742e-08	3.63568	1.86223	3.63568	up	3.28854	1.71745	3.28854	up	-0.700412	1.16181	1.01704	3459	Hs.520414	gb:AF056979.1 /DB_XREF=gi:13562048 /FEA=FLmRNA /CNT=1 /TID=HsAffx.900467.971 /TIER=FL /STK=0 /DEF=Homo sapiens clone YAN1 interferon-gamma receptor mRNA, complete cds. /PROD=interferon-gamma receptor /FL=gb:AF056979.1
IL1R2	211372_s_at	8.18131e-07	1.38712e-08	7.99623	2.99932	7.99623	up	15.7216	3.97467	15.7216	up	-0.578549	2.42077	3.39612	7850	Hs.25333	gb:U64094.1 /DB_XREF=gi:1488065 /FEA=FLmRNA /CNT=1 /TID=Hs.25333.1 /TIER=FL /STK=0 /UG=Hs.25333 /LL=7850 /UG_GENE=IL1R2 /DEF=Human soluble type II interleukin-1 receptor mRNA, complete cds. /PROD=soluble type II interleukin-1 receptor /FL=gb:U64094.1
MGST1	231736_x_at	8.18703e-07	1.38959e-08	2.33126	1.22111	2.33126	up	3.2355	1.69399	3.2355	up	-0.508625	0.712482	1.18537	4257	Hs.389700	gb:NM_020300.1 /DB_XREF=gi:9945305 /GEN=MGST1 /FEA=FLmRNA /CNT=6 /TID=Hs.790.2 /TIER=FL /STK=0 /UG=Hs.790 /LL=4257 /DEF=Homo sapiens microsomal glutathione S-transferase 1 (MGST1), mRNA. /PROD=microsomal glutathione S-transferase 1 /FL=gb:NM_020300.1
C1orf220	1563876_at	8.19212e-07	1.39195e-08	-6.71661	-2.74773	6.71661	down	-3.36596	-1.75102	3.36596	down	0.683262	-2.06447	-1.06776	400798	Hs.668085	gb:AK092849.1 /DB_XREF=gi:21751545 /TID=Hs2.376545.1 /CNT=1 /FEA=mRNA /TIER=ConsEnd /STK=0 /UG=Hs.376545 /UG_TITLE=Homo sapiens cDNA FLJ35530 fis, clone SPLEN2002053. /DEF=Homo sapiens cDNA FLJ35530 fis, clone SPLEN2002053.
	242384_at	8.2465e-07	1.4027e-08	2.24048	1.16381	2.24048	up	2.3358	1.22392	2.3358	up	-0.460111	0.703695	0.763808		Hs.605187	gb:AI452469 /DB_XREF=gi:4285829 /DB_XREF=tj62c12.x1 /CLONE=IMAGE:2146102 /FEA=EST /CNT=3 /TID=Hs.165221.0 /TIER=ConsEnd /STK=3 /UG=Hs.165221 /UG_TITLE=ESTs
SLC41A1	225570_at	8.25036e-07	1.40486e-08	-2.29806	-1.20042	2.29806	down	-3.18214	-1.67	3.18214	down	0.310868	-0.889549	-1.35913	254428	Hs.20274	gb:AW439816 /DB_XREF=gi:6975122 /DB_XREF=hb88b11.x1 /CLONE=IMAGE:2890269 /FEA=EST /CNT=72 /TID=Hs.20274.0 /TIER=Stack /STK=26 /UG=Hs.20274 /UG_TITLE=ESTs, Weakly similar to unnamed protein product (H.sapiens)
	242366_at	8.27196e-07	1.41005e-08	1.79372	0.842958	1.79372	up	1.89888	0.925148	1.89888	up	-0.310961	0.531997	0.614186		Hs.654953	gb:AI921844 /DB_XREF=gi:5657808 /DB_XREF=wp07b02.x1 /CLONE=IMAGE:2464107 /FEA=EST /CNT=9 /TID=Hs.5096.0 /TIER=ConsEnd /STK=3 /UG=Hs.5096 /UG_TITLE=ESTs
RNF19B	36564_at	8.29873e-07	1.41613e-08	-2.90828	-1.54017	2.90828	down	-1.04659	-0.0656922	1.04659	down	0.0885883	-1.45158	0.0228961	127544	Hs.591504	Cluster Incl. W27419:31a10 Homo sapiens cDNA /gb=W27419 /gi=1307241 /ug=Hs.64239 /len=803
PXK	1552274_at	8.32465e-07	1.42208e-08	2.40449	1.26573	2.40449	up	2.11049	1.07758	2.11049	up	-0.544983	0.720746	0.532593	54899	Hs.190544	gb:BC014479.1 /DB_XREF=gi:15680248 /TID=Hs2.322934.1 /CNT=70 /FEA=FLmRNA /TIER=FL+Stack /STK=11 /LL=54899 /UG_GENE=FLJ20335 /UG=Hs.322934 /DEF=Homo sapiens, clone MGC:23156 IMAGE:4856139, mRNA, complete cds. /PROD=Unknown (protein for MGC:23156) /FL=gb:AF399753.1 gb:NM_017771.1 gb:BC014479.1
TAF13	227278_at	8.32707e-07	1.42402e-08	1.30042	0.378974	1.30042	up	3.29773	1.72147	3.29773	up	-0.288669	0.0903051	1.4328	6884		gb:AI056692 /DB_XREF=gi:3330558 /DB_XREF=oz26g11.x1 /CLONE=IMAGE:1676516 /FEA=EST /CNT=31 /TID=Hs.42911.1 /TIER=Stack /STK=24 /UG=Hs.42911 /LL=6884 /UG_GENE=TAF2K /UG_TITLE=TATA box binding protein (TBP)-associated factor, RNA polymerase II, K, 18kD
ASAP1	221039_s_at	8.33447e-07	1.42681e-08	3.56032	1.83201	3.56032	up	1.65098	0.723323	1.65098	up	-0.481429	1.35058	0.241894	50807	Hs.655552	gb:NM_018482.1 /DB_XREF=gi:8923867 /GEN=KIAA1249 /FEA=FLmRNA /CNT=2 /TID=Hs.10669.0 /TIER=FL /STK=0 /UG=Hs.10669 /LL=50807 /DEF=Homo sapiens KIAA1249 protein (KIAA1249), mRNA. /PROD=uncharacterized gastric protein ZG14P /FL=gb:AF222859.1 gb:NM_018482.1
SRM	201516_at	8.34559e-07	1.43176e-08	-2.13286	-1.09279	2.13286	down	-1.97663	-0.98304	1.97663	down	0.368155	-0.724635	-0.614885	6723	Hs.76244	gb:NM_003132.1 /DB_XREF=gi:4507208 /GEN=SRM /FEA=FLmRNA /CNT=318 /TID=Hs.76244.0 /TIER=FL+Stack /STK=83 /UG=Hs.76244 /LL=6723 /DEF=Homo sapiens spermidine synthase (SRM), mRNA. /PROD=spermidine synthase /FL=gb:M34338.1 gb:NM_003132.1 gb:BC000309.1
FAM49B	217916_s_at	8.34559e-07	1.43027e-08	1.8563	0.89243	1.8563	up	2.28445	1.19185	2.28445	up	-0.262029	0.630401	0.929821	51571	Hs.126941	gb:NM_016623.1 /DB_XREF=gi:7705303 /GEN=BM-009 /FEA=FLmRNA /CNT=163 /TID=Hs.92918.0 /TIER=FL+Stack /STK=61 /UG=Hs.92918 /LL=51571 /DEF=Homo sapiens hypothetical protein (BM-009), mRNA. /PROD=hypothetical protein /FL=gb:NM_016623.1 gb:AF208851.1 gb:BC003599.1
MLKL	238025_at	8.35715e-07	1.43527e-08	1.86836	0.901773	1.86836	up	2.26086	1.17687	2.26086	up	-0.443341	0.458432	0.733528	197259	Hs.119878	gb:AA706818 /DB_XREF=gi:2716736 /DB_XREF=zj30e03.s1 /CLONE=IMAGE:451804 /FEA=EST /CNT=12 /TID=Hs.119878.0 /TIER=ConsEnd /STK=1 /UG=Hs.119878 /UG_TITLE=ESTs
NABP1	233085_s_at	8.37704e-07	1.44022e-08	2.16161	1.11211	2.16161	up	4.37822	2.13034	4.37822	up	-0.453857	0.658249	1.67649	64859	Hs.591610	gb:AV734843 /DB_XREF=gi:10852388 /DB_XREF=AV734843 /CLONE=cdAAHD10 /FEA=mRNA /CNT=4 /TID=Hs.118183.1 /TIER=ConsEnd /STK=0 /UG=Hs.118183 /LL=64859 /UG_GENE=FLJ22833 /UG_TITLE=hypothetical protein FLJ22833
BPI	205557_at	8.38917e-07	1.44483e-08	2.57384	1.36392	2.57384	up	9.37476	3.22878	9.37476	up	-0.636526	0.727394	2.59226	671	Hs.529019	gb:NM_001725.1 /DB_XREF=gi:4502446 /GEN=BPI /FEA=FLmRNA /CNT=47 /TID=Hs.89535.0 /TIER=FL+Stack /STK=10 /UG=Hs.89535 /LL=671 /DEF=Homo sapiens bactericidalpermeability-increasing protein (BPI), mRNA. /PROD=bactericidalpermeability-increasing proteinprecursor /FL=gb:J04739.1 gb:AF322588.1 gb:NM_001725.1
CHCHD7	222701_s_at	8.38917e-07	1.44538e-08	1.38732	0.472298	1.38732	up	3.30972	1.72671	3.30972	up	-0.182764	0.289534	1.54394	79145	Hs.436913	gb:AA570393 /DB_XREF=gi:2344373 /DB_XREF=nk62e01.s1 /CLONE=IMAGE:1018104 /FEA=FLmRNA /CNT=76 /TID=Hs.323164.0 /TIER=Stack /STK=14 /UG=Hs.323164 /LL=79145 /UG_GENE=MGC2217 /UG_TITLE=hypothetical protein MGC2217 /FL=gb:BC002546.1 gb:NM_024300.1
GRINA	212090_at	8.39366e-07	1.44768e-08	-1.0783	-0.108758	1.0783	down	2.97151	1.5712	2.97151	up	-0.124635	-0.233393	1.44656	2907	Hs.594634	gb:AL571424 /DB_XREF=gi:12928706 /DB_XREF=AL571424 /CLONE=CS0DI023YH14 (3 prime) /FEA=EST /CNT=257 /TID=Hs.101067.2 /TIER=Stack /STK=90 /UG=Hs.101067 /LL=2648 /UG_GENE=GCN5L2 /UG_TITLE=GCN5 (general control of amino-acid synthesis, yeast, homolog)-like 2
SMARCC2	201320_at	8.49943e-07	1.46748e-08	-2.37781	-1.24963	2.37781	down	-1.38635	-0.471294	1.38635	down	0.233119	-1.01651	-0.238175	6601	Hs.236030	gb:BF663402 /DB_XREF=gi:11937297 /DB_XREF=602144558F1 /CLONE=IMAGE:4297695 /FEA=FLmRNA /CNT=252 /TID=Hs.236030.0 /TIER=Stack /STK=45 /UG=Hs.236030 /LL=6601 /UG_GENE=SMARCC2 /UG_TITLE=SWISNF related, matrix associated, actin dependent regulator of chromatin, subfamily c, member 2 /FL=gb:NM_003075.1 gb:U66616.1
MGAM	206522_at	8.51192e-07	1.4712e-08	4.64246	2.21489	4.64246	up	3.90463	1.96519	3.90463	up	-0.611569	1.60332	1.35362	8972	Hs.122785	gb:NM_004668.1 /DB_XREF=gi:4758711 /GEN=MGAM /FEA=FLmRNA /CNT=22 /TID=Hs.122785.0 /TIER=FL /STK=0 /UG=Hs.122785 /LL=8972 /DEF=Homo sapiens maltase-glucoamylase (alpha-glucosidase) (MGAM), mRNA. /PROD=alpha-glucosidase /FL=gb:AF016833.1 gb:NM_004668.1
PGK1	227068_at	8.52086e-07	1.4743e-08	1.80287	0.850296	1.80287	up	2.75091	1.45991	2.75091	up	-0.271012	0.579284	1.18889	5230	Hs.78771	gb:AA069778 /DB_XREF=gi:1577146 /DB_XREF=zf72d11.s1 /CLONE=IMAGE:382485 /FEA=EST /CNT=32 /TID=Hs.78771.1 /TIER=Stack /STK=13 /UG=Hs.78771 /LL=5230 /UG_GENE=PGK1 /UG_TITLE=phosphoglycerate kinase 1
CARD19	223398_at	8.53012e-07	1.47902e-08	1.23152	0.300435	1.23152	up	2.19926	1.13702	2.19926	up	-0.158438	0.141997	0.978579	84270	Hs.434213	gb:BC004500.1 /DB_XREF=gi:13325387 /FEA=FLmRNA /CNT=71 /TID=Hs.39132.0 /TIER=FL+Stack /STK=50 /UG=Hs.39132 /DEF=Homo sapiens, Similar to RIKEN cDNA 1110007C09 gene, clone MGC:11115, mRNA, complete cds. /PROD=Similar to RIKEN cDNA 1110007C09 gene /FL=gb:BC004500.1
	1562289_at	8.53012e-07	1.47865e-08	3.18273	1.67027	3.18273	up	3.56944	1.8357	3.56944	up	-0.740242	0.930024	1.09545		Hs.638554	gb:AL834519.1 /DB_XREF=gi:21740334 /TID=Hs2.376781.1 /CNT=2 /FEA=mRNA /TIER=ConsEnd /STK=0 /UG=Hs.376781 /UG_TITLE=Homo sapiens mRNA; cDNA DKFZp434N0220 (from clone DKFZp434N0220) /DEF=Homo sapiens mRNA; cDNA DKFZp434N0220 (from clone DKFZp434N0220).
LAS1L	208117_s_at	8.58167e-07	1.4926e-08	-1.66982	-0.739691	1.66982	down	-2.35783	-1.23746	2.35783	down	0.367307	-0.372385	-0.870151	81887	Hs.522675	gb:NM_031206.1 /DB_XREF=gi:13654269 /GEN=FLJ12525 /FEA=FLmRNA /CNT=1 /TID=HsAffx.900167.150 /TIER=FL /STK=0 /DEF=Homo sapiens hypothetical protein FLJ12525 (FLJ12525), mRNA. /PROD=hypothetical protein FLJ12525 /FL=gb:NM_031206.1
HPSE	219403_s_at	8.58167e-07	1.49267e-08	1.38245	0.467229	1.38245	up	3.10579	1.63496	3.10579	up	-0.0915051	0.375724	1.54346	10855	Hs.44227	gb:NM_006665.1 /DB_XREF=gi:5729872 /GEN=HPSE /FEA=FLmRNA /CNT=43 /TID=Hs.44227.0 /TIER=FL+Stack /STK=16 /UG=Hs.44227 /LL=10855 /DEF=Homo sapiens heparanase (HPSE), mRNA. /PROD=heparanase /FL=gb:AF152376.1 gb:AF165154.1 gb:AF155510.1 gb:AF084467.1 gb:NM_006665.1
CMTM4	225009_at	8.58167e-07	1.49e-08	1.36749	0.451528	1.36749	up	2.83609	1.5039	2.83609	up	-0.258266	0.193262	1.24564	146223	Hs.643961	gb:AA191708 /DB_XREF=gi:1780388 /DB_XREF=zp82d10.s1 /CLONE=IMAGE:626707 /FEA=mRNA /CNT=138 /TID=Hs.325825.0 /TIER=Stack /STK=14 /UG=Hs.325825 /UG_TITLE=Homo sapiens cDNA FLJ20848 fis, clone ADKA01732
ITGAM	205786_s_at	8.64236e-07	1.50481e-08	2.11314	1.07939	2.11314	up	4.20463	2.07198	4.20463	up	-0.290996	0.788394	1.78098	3684	Hs.172631	gb:NM_000632.2 /DB_XREF=gi:6006013 /GEN=ITGAM /FEA=FLmRNA /CNT=40 /TID=Hs.172631.0 /TIER=FL /STK=1 /UG=Hs.172631 /LL=3684 /DEF=Homo sapiens integrin, alpha M (complement component receptor 3, alpha; also known as CD11b (p170), macrophage antigen alpha polypeptide) (ITGAM), mRNA. /PROD=integrin alpha M precursor /FL=gb:NM_000632.2 gb:J03925.1
LTA4H	208771_s_at	8.64365e-07	1.50661e-08	1.51831	0.60247	1.51831	up	2.62516	1.39241	2.62516	up	-0.179059	0.423411	1.21335	4048	Hs.524648	gb:J02959.1 /DB_XREF=gi:187174 /FEA=FLmRNA /CNT=302 /TID=Hs.81118.0 /TIER=FL /STK=1 /UG=Hs.81118 /LL=4048 /UG_GENE=LTA4H /UG_TITLE=leukotriene A4 hydrolase /DEF=Human leukotriene A-4 hydrolase mRNA, complete cds. /FL=gb:NM_000895.1 gb:J02959.1 gb:J03459.1
	231513_at	8.69554e-07	1.51725e-08	5.56945	2.47753	5.56945	up	2.19473	1.13405	2.19473	up	-0.724126	1.75341	0.40992		Hs.597550	gb:BF111326 /DB_XREF=gi:10941016 /DB_XREF=7l75e07.x1 /CLONE=IMAGE:3527149 /FEA=EST /CNT=8 /TID=Hs.1547.1 /TIER=Stack /STK=8 /UG=Hs.1547 /LL=3759 /UG_GENE=KCNJ2 /UG_TITLE=potassium inwardly-rectifying channel, subfamily J, member 2
SYN2	210247_at	8.79603e-07	1.53639e-08	2.43435	1.28354	2.43435	up	3.47821	1.79834	3.47821	up	-0.805136	0.4784	0.993208	6854	Hs.445503	gb:AW139618 /DB_XREF=gi:6144336 /DB_XREF=UI-H-BI1-aea-h-11-0-UI.s1 /CLONE=IMAGE:2718956 /FEA=FLmRNA /CNT=15 /TID=Hs.6439.1 /TIER=Stack /STK=10 /UG=Hs.6439 /LL=6854 /UG_GENE=SYN2 /UG_TITLE=synapsin II /FL=gb:AF077671.1
GNAQ	202615_at	8.96162e-07	1.56695e-08	2.11722	1.08217	2.11722	up	2.42768	1.27958	2.42768	up	-0.312302	0.769872	0.967276	2776	Hs.269782	gb:BF222895 /DB_XREF=gi:11130072 /DB_XREF=7q24f10.x1 /CLONE=IMAGE:3699235 /FEA=FLmRNA /CNT=145 /TID=Hs.296261.0 /TIER=Stack /STK=21 /UG=Hs.296261 /LL=2776 /UG_GENE=GNAQ /UG_TITLE=guanine nucleotide binding protein (G protein), q polypeptide /FL=gb:U43083.1 gb:NM_002072.1 gb:AF329284.1 gb:AF011496.1
LGALS8	208934_s_at	9.04399e-07	1.58466e-08	2.61821	1.38858	2.61821	up	2.58993	1.37292	2.58993	up	-0.482195	0.906388	0.890721	3964	Hs.4082	gb:AF342815.1 /DB_XREF=gi:13249298 /FEA=FLmRNA /CNT=266 /TID=Hs.4082.0 /TIER=FL /STK=5 /UG=Hs.4082 /LL=3964 /UG_GENE=LGALS8 /DEF=Homo sapiens colorectal carcinoma-derived galectin-8 variant I mRNA, complete cds. /PROD=colorectal carcinoma-derived galectin-8 variantI /FL=gb:AF074000.1 gb:L78132.1 gb:AF342815.1 gb:NM_006499.1
FBXO9	238472_at	9.04399e-07	1.58384e-08	1.2804	0.356595	1.2804	up	1.85199	0.889073	1.85199	up	-0.261504	0.0950905	0.627569	26268	Hs.216653	gb:R73399 /DB_XREF=gi:847431 /DB_XREF=yj92c12.s1 /CLONE=IMAGE:156214 /FEA=EST /CNT=10 /TID=Hs.126027.0 /TIER=ConsEnd /STK=1 /UG=Hs.126027 /UG_TITLE=ESTs
GNAQ	224861_at	9.09976e-07	1.5961e-08	2.00347	1.0025	2.00347	up	2.82079	1.4961	2.82079	up	-0.361727	0.640773	1.13437	2776	Hs.269782	gb:AA628423 /DB_XREF=gi:2540810 /DB_XREF=af26d05.s1 /CLONE=IMAGE:1032777 /FEA=EST /CNT=162 /TID=Hs.5437.3 /TIER=Stack /STK=26 /UG=Hs.5437 /LL=8887 /UG_GENE=TAX1BP1 /UG_TITLE=Tax1 (human T-cell leukemia virus type I) binding protein 1
	243016_at	9.15451e-07	1.60738e-08	-1.62754	-0.702691	1.62754	down	-2.14035	-1.09785	2.14035	down	0.336637	-0.366054	-0.761208		Hs.661449	gb:AW271958 /DB_XREF=gi:6658988 /DB_XREF=xs12c02.x1 /CLONE=IMAGE:2769410 /FEA=EST /CNT=5 /TID=Hs.87491.0 /TIER=ConsEnd /STK=1 /UG=Hs.87491 /UG_TITLE=ESTs
PRPF31	202408_s_at	9.18993e-07	1.61641e-08	-1.8165	-0.861159	1.8165	down	-1.91169	-0.934846	1.91169	down	0.267751	-0.593409	-0.667095	26121	Hs.515598	gb:NM_015629.1 /DB_XREF=gi:7661653 /GEN=DKFZP566J153 /FEA=FLmRNA /CNT=288 /TID=Hs.183438.0 /TIER=FL+Stack /STK=17 /UG=Hs.183438 /LL=26121 /DEF=Homo sapiens DKFZP566J153 protein (DKFZP566J153), mRNA. /PROD=DKFZP566J153 protein /FL=gb:NM_015629.1 gb:AL050369.1
ESYT1	208858_s_at	9.18993e-07	1.61696e-08	-3.53366	-1.82116	3.53366	down	-2.74214	-1.4553	2.74214	down	0.517373	-1.30379	-0.937929	23344	Hs.632729	gb:BC004998.1 /DB_XREF=gi:13436457 /FEA=FLmRNA /CNT=256 /TID=Hs.8309.0 /TIER=FL+Stack /STK=89 /UG=Hs.8309 /LL=23344 /UG_GENE=KIAA0747 /DEF=Homo sapiens, Similar to membrane bound C2 domain containing protein, clone MGC:4422, mRNA, complete cds. /PROD=Similar to membrane bound C2 domain containingprotein /FL=gb:BC004998.1
CCPG1///DYX1C1-CCPG1	214151_s_at	9.21163e-07	1.62315e-08	1.96062	0.971308	1.96062	up	3.66356	1.87325	3.66356	up	-0.329453	0.641855	1.54379	9236///100533483	Hs.285051	gb:AU144243 /DB_XREF=gi:11005764 /DB_XREF=AU144243 /CLONE=HEMBA1001328 /FEA=EST /CNT=13 /TID=Hs.247118.1 /TIER=Stack /STK=8 /UG=Hs.247118 /LL=9488 /UG_GENE=PIGB /UG_TITLE=phosphatidylinositol glycan, class B
SAR1B	218254_s_at	9.21163e-07	1.62414e-08	1.34857	0.431433	1.34857	up	4.90892	2.29541	4.90892	up	-0.440095	-0.00866188	1.85531	51128	Hs.432984	gb:NM_016103.1 /DB_XREF=gi:7705826 /GEN=LOC51128 /FEA=FLmRNA /CNT=122 /TID=Hs.279582.0 /TIER=FL+Stack /STK=32 /UG=Hs.279582 /LL=51128 /DEF=Homo sapiens GTP-binding protein Sara (LOC51128), mRNA. /PROD=GTP-binding protein Sara /FL=gb:NM_016103.1 gb:AF092130.1
ELK4	238761_at	9.22353e-07	1.62793e-08	-2.26147	-1.17726	2.26147	down	-1.73345	-0.793645	1.73345	down	0.331252	-0.846012	-0.462393	2005	Hs.497520	gb:BE645241 /DB_XREF=gi:9969552 /DB_XREF=7e66h08.x1 /CLONE=IMAGE:3287487 /FEA=EST /CNT=7 /TID=Hs.109370.0 /TIER=ConsEnd /STK=4 /UG=Hs.109370 /UG_TITLE=ESTs
RIT1	209882_at	9.26334e-07	1.63665e-08	1.79859	0.846863	1.79859	up	2.61334	1.38589	2.61334	up	-0.380048	0.466814	1.00585	6016	Hs.491234	gb:AF084462.1 /DB_XREF=gi:4234917 /GEN=ROC1 /FEA=FLmRNA /CNT=47 /TID=Hs.96038.0 /TIER=FL /STK=0 /UG=Hs.96038 /LL=6016 /DEF=Homo sapiens GTP-binding protein ROC1 (ROC1) mRNA, complete cds. /PROD=GTP-binding protein ROC1 /FL=gb:NM_006912.1 gb:U78165.1 gb:U71203.1 gb:AF084462.1
GGCX	214005_at	9.33734e-07	1.65143e-08	1.05915	0.0829131	1.05915	up	1.98156	0.986635	1.98156	up	-0.108206	-0.0252931	0.878429	2677		gb:BE326952 /DB_XREF=gi:9200728 /DB_XREF=hr68a04.x1 /CLONE=IMAGE:3133614 /FEA=EST /CNT=23 /TID=Hs.77719.1 /TIER=Stack /STK=18 /UG=Hs.77719 /LL=2677 /UG_GENE=GGCX /UG_TITLE=gamma-glutamyl carboxylase
PRMT1	206445_s_at	9.40256e-07	1.66469e-08	-1.44594	-0.532004	1.44594	down	-3.19502	-1.67582	3.19502	down	0.310347	-0.221657	-1.36548	3276	Hs.20521	gb:NM_001536.1 /DB_XREF=gi:4504496 /GEN=HRMT1L2 /FEA=FLmRNA /CNT=13 /TID=Hs.20521.0 /TIER=FL /STK=0 /UG=Hs.20521 /LL=3276 /DEF=Homo sapiens HMT1 (hnRNP methyltransferase, S. cerevisiae)-like 2 (HRMT1L2), mRNA. /PROD=HMT1 (hnRNP methyltransferase, S.cerevisiae)-like 2 /FL=gb:NM_001536.1 gb:D66904.1
PNPLA6	203718_at	9.4176e-07	1.66907e-08	-1.49441	-0.579574	1.49441	down	1.81614	0.860878	1.81614	up	-0.0892764	-0.66885	0.771602	10908	Hs.631863	gb:NM_006702.1 /DB_XREF=gi:5729950 /GEN=NTE /FEA=FLmRNA /CNT=82 /TID=Hs.5038.0 /TIER=FL /STK=0 /UG=Hs.5038 /LL=10908 /DEF=Homo sapiens neuropathy target esterase (NTE), mRNA. /PROD=neuropathy target esterase /FL=gb:NM_006702.1
TP53I13	225605_at	9.44898e-07	1.67636e-08	-3.16984	-1.66441	3.16984	down	-3.30786	-1.7259	3.30786	down	0.544978	-1.11943	-1.18092	90313	Hs.514050	gb:AL540867 /DB_XREF=gi:12871395 /DB_XREF=AL540867 /CLONE=CS0DE004YP18 (5 prime) /FEA=mRNA /CNT=76 /TID=Hs.97871.0 /TIER=Stack /STK=43 /UG=Hs.97871 /UG_TITLE=Homo sapiens, clone IMAGE:3845253, mRNA, partial cds
UBALD1	225874_at	9.4603e-07	1.6801e-08	-3.8422	-1.94193	3.8422	down	1.12054	0.164196	1.12054	up	0.308633	-1.6333	0.47283	124402	Hs.513313	gb:BE382898 /DB_XREF=gi:9328263 /DB_XREF=601297616F1 /CLONE=IMAGE:3627891 /FEA=EST /CNT=59 /TID=Hs.14068.0 /TIER=Stack /STK=31 /UG=Hs.14068 /UG_TITLE=ESTs
WNK1	211993_at	9.46328e-07	1.68236e-08	-2.22901	-1.15641	2.22901	down	1.48192	0.567471	1.48192	up	0.143079	-1.01333	0.71055	65125	Hs.744906	gb:AI768512 /DB_XREF=gi:5235021 /DB_XREF=wh22g07.x1 /CLONE=IMAGE:2381532 /FEA=FLmRNA /CNT=397 /TID=Hs.184592.0 /TIER=Stack /STK=9 /UG=Hs.184592 /LL=65125 /UG_GENE=PRKWNK1 /UG_TITLE=protein kinase, lysine deficient 1 /FL=gb:NM_018979.1
NAMPT	217739_s_at	9.51007e-07	1.69242e-08	3.01704	1.59313	3.01704	up	2.57317	1.36355	2.57317	up	-0.516471	1.07666	0.847075	10135	Hs.489615	gb:NM_005746.1 /DB_XREF=gi:5031976 /GEN=PBEF /FEA=FLmRNA /CNT=378 /TID=Hs.239138.0 /TIER=FL /STK=0 /UG=Hs.239138 /LL=10135 /DEF=Homo sapiens pre-B-cell colony-enhancing factor (PBEF), mRNA. /PROD=pre-B-cell colony-enhancing factor /FL=gb:U02020.1 gb:NM_005746.1
ANAPC15	204218_at	9.57184e-07	1.70516e-08	-1.27494	-0.35043	1.27494	down	1.85893	0.894475	1.85893	up	-0.104754	-0.455184	0.789721	25906	Hs.38044	gb:NM_014042.1 /DB_XREF=gi:7661621 /GEN=DKFZP564M082 /FEA=FLmRNA /CNT=67 /TID=Hs.38044.0 /TIER=FL+Stack /STK=18 /UG=Hs.38044 /LL=25906 /DEF=Homo sapiens DKFZP564M082 protein (DKFZP564M082), mRNA. /PROD=DKFZP564M082 protein /FL=gb:AF077206.1 gb:BC005156.1 gb:AL080071.1 gb:NM_014042.1 gb:BC005393.1
USP15	210681_s_at	9.58818e-07	1.70983e-08	2.89797	1.53504	2.89797	up	2.56588	1.35945	2.56588	up	-0.531853	1.00319	0.827601	9958	Hs.434951	gb:AF153604.1 /DB_XREF=gi:5231132 /GEN=UPH /FEA=FLmRNA /CNT=3 /TID=Hs.23168.1 /TIER=FL /STK=0 /UG=Hs.23168 /LL=9958 /DEF=Homo sapiens ubiquitin-specific protease homolog (UPH) mRNA, complete cds. /PROD=ubiquitin-specific protease homolog /FL=gb:AF153604.1
SLC25A37	242335_at	9.65491e-07	1.72349e-08	2.20089	1.13809	2.20089	up	3.23651	1.69444	3.23651	up	-0.602619	0.535467	1.09182	51312		gb:AA382004 /DB_XREF=gi:2034457 /DB_XREF=EST95296 /FEA=EST /CNT=7 /TID=Hs.33757.0 /TIER=ConsEnd /STK=0 /UG=Hs.33757 /UG_TITLE=ESTs
ERLIN1	202441_at	9.65771e-07	1.72683e-08	3.19535	1.67598	3.19535	up	3.72972	1.89907	3.72972	up	-0.272318	1.40366	1.62675	10613	Hs.150087	gb:AL568449 /DB_XREF=gi:12922799 /DB_XREF=AL568449 /CLONE=CS0DE001YC12 (3 prime) /FEA=FLmRNA /CNT=158 /TID=Hs.285818.0 /TIER=Stack /STK=66 /UG=Hs.285818 /LL=10613 /UG_GENE=KEO4 /UG_TITLE=similar to Caenorhabditis elegans protein C42C1.9 /FL=gb:NM_006459.1 gb:AF064093.1
USP32	211702_s_at	9.65771e-07	1.72753e-08	2.07524	1.05328	2.07524	up	2.04035	1.02882	2.04035	up	-0.440568	0.612709	0.58825	84669	Hs.132868	gb:AF350251.1 /DB_XREF=gi:13560796 /FEA=FLmRNA /CNT=1 /TID=HsAffx.900637.340 /TIER=FL /STK=0 /DEF=Homo sapiens ubiquitin specific protease mRNA, complete cds. /PROD=ubiquitin specific protease /FL=gb:AF350251.1
IL1R2	205403_at	9.66071e-07	1.73112e-08	6.3311	2.66246	6.3311	up	11.3996	3.51091	11.3996	up	-0.418129	2.24433	3.09278	7850	Hs.25333	gb:NM_004633.1 /DB_XREF=gi:4758597 /GEN=IL1R2 /FEA=FLmRNA /CNT=35 /TID=Hs.25333.0 /TIER=FL+Stack /STK=13 /UG=Hs.25333 /LL=7850 /DEF=Homo sapiens interleukin 1 receptor, type II (IL1R2), mRNA. /PROD=interleukin 1 receptor, type II /FL=gb:U74649.1 gb:NM_004633.1
MCTP2	229005_at	9.66071e-07	1.73343e-08	3.32357	1.73273	3.32357	up	3.88429	1.95765	3.88429	up	-0.849931	0.882803	1.10772	55784	Hs.33368	gb:AI052257 /DB_XREF=gi:3308248 /DB_XREF=oz21d04.x1 /CLONE=IMAGE:1675975 /FEA=mRNA /CNT=22 /TID=Hs.50742.0 /TIER=Stack /STK=10 /UG=Hs.50742 /UG_TITLE=Homo sapiens cDNA: FLJ23331 fis, clone HEP12664
AARS2	231845_at	9.66071e-07	1.73432e-08	-1.96456	-0.97421	1.96456	down	-1.85716	-0.893099	1.85716	down	0.388095	-0.586114	-0.505004	57505	Hs.158381	gb:AI721172 /DB_XREF=gi:5038428 /DB_XREF=as66e12.x1 /CLONE=IMAGE:2333710 /FEA=mRNA /CNT=39 /TID=Hs.197668.0 /TIER=ConsEnd /STK=4 /UG=Hs.197668 /LL=57505 /UG_GENE=KIAA1270 /UG_TITLE=KIAA1270 protein
VSIG1	243764_at	9.66071e-07	1.73513e-08	-1.97746	-0.983652	1.97746	down	-2.29628	-1.1993	2.29628	down	0.302951	-0.680701	-0.896349	340547	Hs.177164	gb:AW085312 /DB_XREF=gi:6040464 /DB_XREF=xe08f05.x1 /CLONE=IMAGE:2606529 /FEA=EST /CNT=5 /TID=Hs.177164.0 /TIER=ConsEnd /STK=1 /UG=Hs.177164 /UG_TITLE=ESTs
SLC2A4RG	1555500_s_at	9.6867e-07	1.74157e-08	-9.50645	-3.24891	9.50645	down	-2.75834	-1.4638	2.75834	down	0.414752	-2.83415	-1.04905	56731	Hs.435126	gb:BC013687.1 /DB_XREF=gi:16507920 /TID=Hs2Affx.1.336 /CNT=1 /FEA=FLmRNA /TIER=FL /STK=1 /NOTE=sequence(s) not in UniGene /DEF=Homo sapiens, uncharacterized hematopoietic stemprogenitor cells protein MDS027, clone MGC:17655 IMAGE:3858231, mRNA, complete cds. /PROD=uncharacterized hematopoietic stemprogenitorcells protein MDS027 /FL=gb:BC013687.1
SNCA	204467_s_at	9.68817e-07	1.7436e-08	5.10522	2.35197	5.10522	up	3.91766	1.96999	3.91766	up	-1.16263	1.18935	0.807367	6622	Hs.21374	gb:NM_000345.2 /DB_XREF=gi:6806896 /GEN=SNCA /FEA=FLmRNA /CNT=101 /TID=Hs.76930.1 /TIER=FL /STK=0 /UG=Hs.76930 /LL=6622 /DEF=Homo sapiens synuclein, alpha (non A4 component of amyloid precursor) (SNCA), transcript variant NACP140, mRNA. /PROD=alpha-synuclein isoform NACP140 /FL=gb:NM_000345.2 gb:L08850.1
	243154_at	9.69169e-07	1.74601e-08	-2.35822	-1.2377	2.35822	down	-3.81556	-1.9319	3.81556	down	0.42167	-0.816029	-1.51022		Hs.86650	gb:AA215381 /DB_XREF=gi:1815191 /DB_XREF=zr97c09.s1 /CLONE=IMAGE:683632 /FEA=EST /CNT=4 /TID=Hs.86650.0 /TIER=ConsEnd /STK=3 /UG=Hs.86650 /UG_TITLE=ESTs
MAP4K1	214339_s_at	9.70549e-07	1.75205e-08	-2.32768	-1.21889	2.32768	down	-2.2701	-1.18276	2.2701	down	0.416407	-0.802487	-0.766348	11184	Hs.95424	gb:AA744529 /DB_XREF=gi:2783293 /DB_XREF=ny79a04.s1 /CLONE=IMAGE:1284462 /FEA=EST /CNT=10 /TID=Hs.86575.2 /TIER=Stack /STK=10 /UG=Hs.86575 /LL=11184 /UG_GENE=MAP4K1 /UG_TITLE=mitogen-activated protein kinase kinase kinase kinase 1
ST6GALNAC3	235334_at	9.70549e-07	1.75049e-08	3.55443	1.82962	3.55443	up	5.33484	2.41545	5.33484	up	-0.565313	1.26431	1.85013	256435	Hs.337040	gb:AW963951 /DB_XREF=gi:8153787 /DB_XREF=EST376024 /FEA=EST /CNT=13 /TID=Hs.85618.0 /TIER=ConsEnd /STK=0 /UG=Hs.85618 /UG_TITLE=ESTs
PGLYRP1	207384_at	9.77137e-07	1.77102e-08	3.35279	1.74536	3.35279	up	6.75843	2.75669	6.75843	up	-0.762398	0.982964	1.99429	8993	Hs.137583	gb:NM_005091.1 /DB_XREF=gi:4827035 /GEN=PGLYRP /FEA=FLmRNA /CNT=7 /TID=Hs.137583.0 /TIER=FL /STK=0 /UG=Hs.137583 /LL=8993 /DEF=Homo sapiens peptidoglycan recognition protein (PGLYRP), mRNA. /PROD=peptidoglycan recognition protein /FL=gb:NM_005091.1 gb:AF242517.1 gb:AF076483.1
IFT20	210312_s_at	9.77137e-07	1.77109e-08	1.3784	0.462999	1.3784	up	2.828	1.49978	2.828	up	-0.337051	0.125948	1.16273	90410	Hs.705431///Hs.744876	gb:BC002640.1 /DB_XREF=gi:12803610 /FEA=FLmRNA /CNT=10 /TID=Hs.4187.0 /TIER=FL /STK=0 /UG=Hs.4187 /LL=55977 /UG_GENE=LOC55977 /DEF=Homo sapiens, Similar to uterine protein, clone MGC:4279, mRNA, complete cds. /PROD=Similar to uterine protein /FL=gb:BC002640.1
TP53I3	210609_s_at	9.77137e-07	1.76583e-08	2.43686	1.28502	2.43686	up	5.56246	2.47572	5.56246	up	-0.712491	0.572533	1.76323	9540	Hs.50649	gb:BC000474.1 /DB_XREF=gi:12653408 /FEA=FLmRNA /CNT=7 /TID=Hs.50649.1 /TIER=FL /STK=0 /UG=Hs.50649 /LL=9540 /UG_GENE=PIG3 /DEF=Homo sapiens, quinone oxidoreductase homolog, clone MGC:8642, mRNA, complete cds. /PROD=quinone oxidoreductase homolog /FL=gb:BC000474.1
FNDC3B	222693_at	9.77137e-07	1.76946e-08	1.48206	0.567608	1.48206	up	4.31179	2.10829	4.31179	up	-0.407943	0.159665	1.70034	64778	Hs.744888	gb:BF444916 /DB_XREF=gi:11510054 /DB_XREF=nad19a09.x1 /CLONE=IMAGE:3365681 /FEA=FLmRNA /CNT=82 /TID=Hs.299883.0 /TIER=Stack /STK=13 /UG=Hs.299883 /LL=64778 /UG_GENE=FLJ23399 /UG_TITLE=hypothetical protein FLJ23399 /FL=gb:NM_022763.1
ALDH16A1	227592_at	9.83026e-07	1.78356e-08	-5.10807	-2.35278	5.10807	down	-3.49055	-1.80345	3.49055	down	0.840328	-1.51245	-0.963126	126133	Hs.719998	gb:AI674922 /DB_XREF=gi:4875402 /DB_XREF=wc73g08.x1 /CLONE=IMAGE:2324318 /FEA=mRNA /CNT=29 /TID=Hs.133494.0 /TIER=Stack /STK=15 /UG=Hs.133494 /UG_TITLE=Homo sapiens clone TCCCIA00164 mRNA sequence
SCAF11	1570507_at	9.95104e-07	1.80729e-08	1.89329	0.920895	1.89329	up	-1.16953	-0.225932	1.16953	down	-0.145462	0.775433	-0.371394	9169	Hs.210367	gb:BC020736.1 /DB_XREF=gi:18088437 /TID=Hs2.382858.3 /CNT=1 /FEA=mRNA /TIER=ConsEnd /STK=0 /UG=Hs.382858 /UG_TITLE=Homo sapiens cDNA FLJ37923 fis, clone CTONG1000283, weakly similar to BETA-CATENIN. /DEF=Homo sapiens, clone IMAGE:4337853, mRNA.
KLF12	206965_at	9.99487e-07	1.81708e-08	-3.52562	-1.81788	3.52562	down	-4.46833	-2.15974	4.46833	down	0.492511	-1.32537	-1.66723	11278	Hs.373857	gb:NM_016285.1 /DB_XREF=gi:7706476 /GEN=LOC51717 /FEA=FLmRNA /CNT=9 /TID=Hs.278998.0 /TIER=FL /STK=0 /UG=Hs.278998 /LL=51717 /DEF=Homo sapiens AP-2rep transcription factor (LOC51717), mRNA. /PROD=AP-2rep transcription factor /FL=gb:NM_016285.1 gb:AF113122.1 gb:AF161471.1
MAL	204777_s_at	1.00946e-06	1.83745e-08	-3.09227	-1.62866	3.09227	down	-3.62899	-1.85957	3.62899	down	0.506428	-1.12224	-1.35314	4118	Hs.80395	gb:NM_002371.2 /DB_XREF=gi:12408666 /GEN=MAL /FEA=FLmRNA /CNT=96 /TID=Hs.80395.3 /TIER=FL+Stack /STK=38 /UG=Hs.80395 /LL=4118 /DEF=Homo sapiens mal, T-cell differentiation protein (MAL), transcript variant a, mRNA. /PROD=T-cell differentiation protein MAL, isoform a /FL=gb:NM_002371.2 gb:BC000458.1 gb:BC003006.1 gb:M15800.1
PVT1	1558290_a_at	1.00946e-06	1.83891e-08	-2.24132	-1.16435	2.24132	down	-2.49691	-1.32014	2.49691	down	0.371886	-0.792462	-0.948258	5820	Hs.133107	gb:BG200951 /DB_XREF=gi:13722638 /DB_XREF=RST20273 /TID=Hs2.8854.2 /CNT=16 /FEA=mRNA /TIER=ConsEnd /STK=0 /LL=5820 /UG_GENE=PVT1 /UG=Hs.8854 /UG_TITLE=Pvt1 oncogene homolog, MYC activator (mouse)
CD96	206761_at	1.01214e-06	1.84564e-08	-2.19276	-1.13275	2.19276	down	-4.08462	-2.0302	4.08462	down	0.46118	-0.67157	-1.56902	10225	Hs.142023	gb:NM_005816.1 /DB_XREF=gi:5032140 /GEN=TACTILE /FEA=FLmRNA /CNT=9 /TID=Hs.142023.0 /TIER=FL /STK=1 /UG=Hs.142023 /LL=10225 /DEF=Homo sapiens T cell activation, increased late expression (TACTILE), mRNA. /PROD=T cell activation, increased late expression /FL=gb:M88282.1 gb:NM_005816.1
RHOT1	224044_at	1.01408e-06	1.85184e-08	2.2607	1.17677	2.2607	up	2.07974	1.0564	2.07974	up	-0.446713	0.730057	0.609687	55288		gb:AL136929.1 /DB_XREF=gi:12053352 /GEN=DKFZp586D0222 /FEA=FLmRNA /CNT=2 /TID=Hs.14202.1 /TIER=FL /STK=0 /UG=Hs.14202 /LL=55288 /DEF=Homo sapiens mRNA; cDNA DKFZp586D0222 (from clone DKFZp586D0222); complete cds. /PROD=hypothetical protein /FL=gb:AL136929.1
ZNF281	228785_at	1.01408e-06	1.8529e-08	2.19505	1.13426	2.19505	up	2.74938	1.45911	2.74938	up	-0.46935	0.664906	0.989756	23528	Hs.59757///Hs.703449	gb:AA121673 /DB_XREF=gi:1679286 /DB_XREF=zn79e06.r1 /CLONE=IMAGE:564418 /FEA=EST /CNT=15 /TID=Hs.59757.1 /TIER=Stack /STK=12 /UG=Hs.59757 /LL=23528 /UG_GENE=ZNF281 /UG_TITLE=zinc finger protein 281
ROBO3	219550_at	1.01511e-06	1.85662e-08	-5.02893	-2.33025	5.02893	down	-3.40723	-1.7686	3.40723	down	0.624924	-1.70533	-1.14367	64221	Hs.435621	gb:NM_022370.1 /DB_XREF=gi:11641296 /GEN=FLJ21044 /FEA=FLmRNA /CNT=31 /TID=Hs.25477.0 /TIER=FL+Stack /STK=26 /UG=Hs.25477 /LL=64221 /DEF=Homo sapiens hypothetical protein FLJ21044 similar to Rbig1 (FLJ21044), mRNA. /PROD=hypothetical protein FLJ21044 similar to Rbig1 /FL=gb:NM_022370.1
ATP5J	202325_s_at	1.01559e-06	1.85937e-08	-1.28047	-0.356675	1.28047	down	2.35244	1.23416	2.35244	up	-0.157509	-0.514184	1.07665	522	Hs.246310	gb:NM_001685.1 /DB_XREF=gi:4502292 /GEN=ATP5J /FEA=FLmRNA /CNT=204 /TID=Hs.73851.0 /TIER=FL+Stack /STK=116 /UG=Hs.73851 /LL=522 /DEF=Homo sapiens ATP synthase, H+ transporting, mitochondrial F0 complex, subunit F6 (ATP5J), mRNA. /PROD=ATP synthase, H+ transporting, mitochondrial /FL=gb:M37104.1 gb:NM_001685.1 gb:M73031.1 gb:AL110183.1
HDGFRP3	209525_at	1.02119e-06	1.87148e-08	2.97359	1.57221	2.97359	up	2.37197	1.24609	2.37197	up	-0.479918	1.09229	0.766171	50810	Hs.513954	gb:BG285017 /DB_XREF=gi:13036553 /DB_XREF=602409285F1 /CLONE=IMAGE:4538229 /FEA=FLmRNA /CNT=92 /TID=Hs.127842.0 /TIER=ConsEnd /STK=0 /UG=Hs.127842 /LL=50810 /UG_GENE=CGI-142 /UG_TITLE=CGI-142 /FL=gb:NM_016073.1 gb:AF151900.1 gb:AB029156.1
LSM4	202737_s_at	1.02439e-06	1.87922e-08	-1.93821	-0.954722	1.93821	down	-1.47501	-0.560721	1.47501	down	0.323113	-0.631609	-0.237608	25804	Hs.515255	gb:NM_012321.1 /DB_XREF=gi:6912485 /GEN=LSM4 /FEA=FLmRNA /CNT=189 /TID=Hs.76719.0 /TIER=FL+Stack /STK=100 /UG=Hs.76719 /LL=25804 /DEF=Homo sapiens U6 snRNA-associated Sm-like protein (LSM4), mRNA. /PROD=U6 snRNA-associated Sm-like protein /FL=gb:BC003652.1 gb:NM_012321.1 gb:AF251218.1 gb:BC000387.1 gb:AF182290.1 gb:AF117235.1
	228309_at	1.02661e-06	1.88517e-08	1.79085	0.840645	1.79085	up	2.27366	1.18502	2.27366	up	-0.629571	0.211074	0.555449			gb:AA130982 /DB_XREF=gi:1692473 /DB_XREF=zo15c06.s1 /CLONE=IMAGE:586954 /FEA=EST /CNT=23 /TID=Hs.22391.2 /TIER=Stack /STK=8 /UG=Hs.22391 /LL=57136 /UG_GENE=C20ORF3 /UG_TITLE=chromosome 20open reading frame 3
RABEP2	74694_s_at	1.02943e-06	1.89222e-08	-2.11085	-1.07783	2.11085	down	-2.18261	-1.12605	2.18261	down	0.595975	-0.481852	-0.53008	79874	Hs.555978	Cluster Incl. AA907940:ol24e02.s1 Homo sapiens cDNA, 3 end /clone=IMAGE-1524410 /clone_end=3' /gb=AA907940 /gi=3041944 /ug=Hs.234006 /len=404
ACD	204617_s_at	1.03142e-06	1.89778e-08	-1.74082	-0.799771	1.74082	down	-1.94417	-0.959151	1.94417	down	0.359681	-0.44009	-0.59947	65057	Hs.78019	gb:NM_022914.1 /DB_XREF=gi:12597658 /GEN=24432 /FEA=FLmRNA /CNT=59 /TID=Hs.78019.0 /TIER=FL+Stack /STK=21 /UG=Hs.78019 /LL=65057 /DEF=Homo sapiens hypothetical protein 24432 (24432), mRNA. /PROD=hypothetical protein 24432 /FL=gb:NM_022914.1
UBE2W	222657_s_at	1.03589e-06	1.90789e-08	1.97045	0.978527	1.97045	up	3.20282	1.67934	3.20282	up	-0.421436	0.55709	1.2579	55284	Hs.128841	gb:AK024050.1 /DB_XREF=gi:10436320 /FEA=FLmRNA /CNT=85 /TID=Hs.21275.0 /TIER=Stack /STK=24 /UG=Hs.21275 /LL=55284 /UG_GENE=FLJ11011 /UG_TITLE=hypothetical protein FLJ11011 /DEF=Homo sapiens cDNA FLJ13988 fis, clone Y79AA1002027, moderately similar to UBIQUITIN-CONJUGATING ENZYME E2-18 KD (EC 6.3.2.19). /FL=gb:NM_018299.1
RBMS1	225269_s_at	1.03627e-06	1.91048e-08	1.71465	0.777911	1.71465	up	2.54409	1.34715	2.54409	up	-0.330994	0.446917	1.01615	5937	Hs.470412	gb:BE384529 /DB_XREF=gi:9329894 /DB_XREF=601277919F1 /CLONE=IMAGE:3618797 /FEA=mRNA /CNT=106 /TID=Hs.239870.1 /TIER=Stack /STK=16 /UG=Hs.239870 /UG_TITLE=Homo sapiens mRNA; cDNA DKFZp564H0764 (from clone DKFZp564H0764)
CDK4	202246_s_at	1.03731e-06	1.9162e-08	-1.97244	-0.979983	1.97244	down	-2.04711	-1.03359	2.04711	down	0.289091	-0.690892	-0.744497	1019	Hs.95577	gb:NM_000075.1 /DB_XREF=gi:4502734 /GEN=CDK4 /FEA=FLmRNA /CNT=193 /TID=Hs.95577.0 /TIER=FL+Stack /STK=106 /UG=Hs.95577 /LL=1019 /DEF=Homo sapiens cyclin-dependent kinase 4 (CDK4), mRNA. /PROD=cyclin-dependent kinase 4 /FL=gb:BC003644.1 gb:M14505.1 gb:NM_000075.1 gb:U79269.1
PGAP3	55616_at	1.03731e-06	1.91612e-08	-1.32384	-0.404732	1.32384	down	-2.07845	-1.05551	2.07845	down	0.302993	-0.101738	-0.752515	93210	Hs.462971	Cluster Incl. AI703342:wd93b03.x1 Homo sapiens cDNA, 3 end /clone=IMAGE-2339117 /clone_end=3' /gb=AI703342 /gi=4991242 /ug=Hs.91668 /len=494
ENTPD7	235204_at	1.05437e-06	1.94964e-08	1.82641	0.869009	1.82641	up	5.32209	2.41199	5.32209	up	-0.621847	0.247161	1.79015	57089	Hs.28326	gb:BF878343 /DB_XREF=gi:12268473 /DB_XREF=MR0-ET0107-191100-002-a08 /FEA=EST /CNT=12 /TID=Hs.124833.0 /TIER=ConsEnd /STK=0 /UG=Hs.124833 /UG_TITLE=ESTs
LPGAT1	1555058_a_at	1.05972e-06	1.96147e-08	-1.29639	-0.374497	1.29639	down	2.6485	1.40518	2.6485	up	-0.0681548	-0.442652	1.33702	9926	Hs.744851	gb:BC034621.1 /DB_XREF=gi:22902214 /TID=Hs2.3610.2 /CNT=2 /FEA=FLmRNA /TIER=FL /STK=1 /LL=9926 /UG_GENE=KIAA0205 /UG=Hs.3610 /DEF=Homo sapiens, similar to KIAA0205 gene product, clone MGC:43049 IMAGE:4839400, mRNA, complete cds. /PROD=similar to KIAA0205 gene product /FL=gb:BC034621.1
MTMR3	226956_at	1.05994e-06	1.96382e-08	1.70922	0.77334	1.70922	up	2.03593	1.02569	2.03593	up	-0.202674	0.570666	0.823015	8897	Hs.474536	gb:AW025389 /DB_XREF=gi:5878919 /DB_XREF=wu96e11.x1 /CLONE=IMAGE:2527916 /FEA=EST /CNT=44 /TID=Hs.6674.0 /TIER=Stack /STK=11 /UG=Hs.6674 /UG_TITLE=ESTs
PAXIP1-AS1	235587_at	1.08175e-06	2.00621e-08	-1.8111	-0.856863	1.8111	down	-2.6516	-1.40686	2.6516	down	0.397156	-0.459706	-1.00971	202781	Hs.193172	gb:BG400596 /DB_XREF=gi:13294044 /DB_XREF=602464249F1 /CLONE=IMAGE:4592173 /FEA=EST /CNT=11 /TID=Hs.193172.0 /TIER=ConsEnd /STK=0 /UG=Hs.193172 /UG_TITLE=ESTs, Moderately similar to ALUA_HUMAN !!!! ALU CLASS A WARNING ENTRY !!! (H.sapiens)
OSM	230170_at	1.08471e-06	2.01425e-08	3.89429	1.96136	3.89429	up	3.84969	1.94474	3.84969	up	-1.06988	0.891482	0.874863	5008	Hs.248156	gb:AI079327 /DB_XREF=gi:3415578 /DB_XREF=oz36h01.x1 /CLONE=IMAGE:1677457 /FEA=EST /CNT=12 /TID=Hs.134435.0 /TIER=Stack /STK=10 /UG=Hs.134435 /UG_TITLE=ESTs
LOC105369360	1559410_at	1.08471e-06	2.01567e-08	-1.91658	-0.938536	1.91658	down	-4.2164	-2.07601	4.2164	down	0.471538	-0.466998	-1.60447	105369360	Hs.587688	gb:AA524609 /DB_XREF=gi:2265537 /DB_XREF=nh34c11.s1 /CLONE=IMAGE:954260 /TID=Hs2.166817.2 /CNT=9 /FEA=mRNA /TIER=ConsEnd /STK=0 /UG=Hs.166817 /UG_TITLE=Homo sapiens cDNA FLJ36460 fis, clone THYMU2014801.
LPGAT1	202651_at	1.0866e-06	2.02497e-08	2.22904	1.15642	2.22904	up	2.98607	1.57825	2.98607	up	-0.469935	0.686486	1.10831	9926	Hs.744851	gb:NM_014873.1 /DB_XREF=gi:7661995 /GEN=KIAA0205 /FEA=FLmRNA /CNT=127 /TID=Hs.3610.0 /TIER=FL+Stack /STK=39 /UG=Hs.3610 /LL=9926 /DEF=Homo sapiens KIAA0205 gene product (KIAA0205), mRNA. /PROD=KIAA0205 gene product /FL=gb:D86960.1 gb:NM_014873.1
IL10RA	204912_at	1.0866e-06	2.02714e-08	-1.85654	-0.892614	1.85654	down	-1.8503	-0.887757	1.8503	down	0.497645	-0.394969	-0.390113	3587	Hs.504035	gb:NM_001558.1 /DB_XREF=gi:4504632 /GEN=IL10RA /FEA=FLmRNA /CNT=52 /TID=Hs.327.0 /TIER=FL+Stack /STK=16 /UG=Hs.327 /LL=3587 /DEF=Homo sapiens interleukin 10 receptor, alpha (IL10RA), mRNA. /PROD=interleukin 10 receptor, alpha /FL=gb:NM_001558.1 gb:U00672.1
UBL5	218011_at	1.0866e-06	2.02147e-08	1.33048	0.411947	1.33048	up	2.87175	1.52193	2.87175	up	-0.446188	-0.0342405	1.07574	59286	Hs.534477	gb:NM_024292.1 /DB_XREF=gi:13236509 /GEN=UBL5 /FEA=FLmRNA /CNT=170 /TID=Hs.109701.0 /TIER=FL+Stack /STK=94 /UG=Hs.109701 /LL=59286 /DEF=Homo sapiens ubiquitin-like 5 (UBL5), mRNA. /PROD=ubiquitin-like 5 /FL=gb:NM_024292.1 gb:AF313915.1
PGM2	225366_at	1.0866e-06	2.02569e-08	2.3596	1.23854	2.3596	up	3.94427	1.97976	3.94427	up	-0.521108	0.717432	1.45865	55276	Hs.23363	gb:AI652855 /DB_XREF=gi:4736834 /DB_XREF=wb40a11.x1 /CLONE=IMAGE:2308124 /FEA=EST /CNT=89 /TID=Hs.23363.1 /TIER=Stack /STK=8 /UG=Hs.23363 /LL=55276 /UG_GENE=FLJ10983 /UG_TITLE=hypothetical protein FLJ10983
ZAK	222757_s_at	1.08837e-06	2.03242e-08	1.449	0.535061	1.449	up	2.33035	1.22055	2.33035	up	-0.303239	0.231822	0.917308	51776	Hs.444451	gb:AB030034.1 /DB_XREF=gi:9927292 /GEN=mlklak /FEA=FLmRNA /CNT=66 /TID=Hs.115175.0 /TIER=FL+Stack /STK=10 /UG=Hs.115175 /LL=51776 /DEF=Homo sapiens mlklak mRNA for plaucible mixed-lineage kinase protein, complete cds. /PROD=plaucible mixed-lineage kinase protein /FL=gb:NM_016653.1 gb:AB030034.1 gb:AF251441.1 gb:AF238255.1 gb:AB049733.1
RCAN3	226272_at	1.08963e-06	2.03678e-08	-2.50798	-1.32652	2.50798	down	-3.7111	-1.89185	3.7111	down	0.594272	-0.732252	-1.29757	11123		gb:N25986 /DB_XREF=gi:1140334 /DB_XREF=yx88c06.s1 /CLONE=IMAGE:268810 /FEA=EST /CNT=67 /TID=Hs.22380.1 /TIER=Stack /STK=20 /UG=Hs.22380 /UG_TITLE=ESTs
	240326_at	1.08997e-06	2.03939e-08	2.06817	1.04835	2.06817	up	2.22577	1.1543	2.22577	up	-0.455431	0.592921	0.69887			gb:AV700865 /DB_XREF=gi:10302836 /DB_XREF=AV700865 /CLONE=GKCDAH05 /FEA=EST /CNT=6 /TID=Hs.159501.0 /TIER=ConsEnd /STK=4 /UG=Hs.159501 /UG_TITLE=ESTs
CCDC186	229399_at	1.09242e-06	2.04599e-08	-2.76896	-1.46934	2.76896	down	1.123	0.167358	1.123	up	0.118918	-1.35043	0.286276	55088	Hs.159066	gb:BF438440 /DB_XREF=gi:11450957 /DB_XREF=7q13f07.x1 /CLONE=IMAGE:3698436 /FEA=EST /CNT=15 /TID=Hs.195704.0 /TIER=Stack /STK=9 /UG=Hs.195704 /UG_TITLE=ESTs
CD163	215049_x_at	1.09481e-06	2.05246e-08	6.63894	2.73095	6.63894	up	5.65119	2.49855	5.65119	up	-0.576334	2.15462	1.92222	9332	Hs.504641	gb:Z22969.1 /DB_XREF=gi:312143 /FEA=mRNA /CNT=7 /TID=Hs.74076.2 /TIER=ConsEnd /STK=5 /UG=Hs.74076 /LL=9332 /UG_GENE=CD163 /DEF=H.sapiens mRNA for M130 antigen cytoplasmic variant 1. /PROD=M130 antigen cytoplasmic variant 1
MPP1	202974_at	1.09575e-06	2.05623e-08	2.39399	1.25942	2.39399	up	2.72023	1.44373	2.72023	up	-0.594072	0.665344	0.849658	4354	Hs.496984	gb:NM_002436.2 /DB_XREF=gi:6006024 /GEN=MPP1 /FEA=FLmRNA /CNT=176 /TID=Hs.1861.0 /TIER=FL+Stack /STK=78 /UG=Hs.1861 /LL=4354 /DEF=Homo sapiens membrane protein, palmitoylated 1 (55kD) (MPP1), mRNA. /PROD=palmitoylated membrane protein 1 /FL=gb:BC002392.1 gb:NM_002436.2 gb:M64925.1
FOXO3	224889_at	1.09754e-06	2.0616e-08	2.29085	1.19588	2.29085	up	2.02076	1.0149	2.02076	up	-0.315365	0.88052	0.699534	2309	Hs.220950	gb:BE888885 /DB_XREF=gi:10345636 /DB_XREF=601513810F1 /CLONE=IMAGE:3915194 /FEA=mRNA /CNT=121 /TID=Hs.214783.0 /TIER=Stack /STK=12 /UG=Hs.214783 /UG_TITLE=Homo sapiens cDNA FLJ14041 fis, clone HEMBA1005780
TRIM44	217759_at	1.09831e-06	2.06757e-08	-1.3206	-0.401189	1.3206	down	-1.97124	-0.979102	1.97124	down	0.24623	-0.154959	-0.732872	54765	Hs.192103	gb:BF431488 /DB_XREF=gi:11443602 /DB_XREF=7o14f01.x1 /CLONE=IMAGE:3574033 /FEA=FLmRNA /CNT=357 /TID=Hs.14512.0 /TIER=Stack /STK=82 /UG=Hs.14512 /LL=54765 /UG_GENE=HSA249128 /UG_TITLE=DIPB protein /FL=gb:NM_017583.1
TLN1	236132_at	1.09831e-06	2.06757e-08	1.83612	0.876658	1.83612	up	1.93325	0.951028	1.93325	up	-0.509302	0.367356	0.441725	7094	Hs.471014	gb:AI870477 /DB_XREF=gi:5544445 /DB_XREF=wl74b03.x1 /CLONE=IMAGE:2430605 /FEA=EST /CNT=6 /TID=Hs.190954.0 /TIER=ConsEnd /STK=6 /UG=Hs.190954 /UG_TITLE=ESTs
[truncated: 15,614 more rows]

## Sheet: Table S7.2
Gene Symbol	Distance-Based Similarity	Probe Set ID	[Healthy Control](normalized)	[Post-Surgical](normalized)	[Sepsis](normalized)	Entrez Gene	UniGene ID	Target Description
[truncated: 6 more rows]

[truncated: 7 more sheets: Table S7.3, Table S7.4, Table S7.5, Table S7.6, Table S7.7, Table S7.8, Table S7.9]
