# Supplementary material for: Development of a Bioinformatics Framework for Identification and Validation of Genomic Biomarkers and Key Immunopathology Processes and Controllers in Infectious and Non-infectious Severe Inflammatory Response Syndrome
Source: Front Immunol. 2020 Mar 31;11:380. doi: 10.3389/fimmu.2020.00380 (PMC7147506; doi:10.3389/fimmu.2020.00380)
Supplement: Supplementary Information S8 — Table S8.1: ANOVA results for dataset E-GEO 13904, ranked on significance (p-value from lowest to highest). Table S8.2: Results of similar entities analysis for CD177 using dataset E-GEO 13904. Table S8.3: Results of similar entities analysis for FGF13 using dataset E-GEO 13904. Table S8.4: Results of similar entities analysis for GPR84 using dataset E-GEO 13904. Table S8.5: Results of similar entities analysis for KLRK1 using dataset E-GEO 13904. Table S8.6: Results of similar entities analysis for MYL9 using dataset E-GEO 13904. Table S8.7: Results of similar entities analysis for PCOLCE2 using dataset E-GEO 13904. Table S8.8: Results of similar entities analysis for SLC16A3 using dataset E-GEO 13904. Table S8.9: Results of similar entities analysis for TDRD9 using dataset E-GEO 13904. [file Table_8.xlsx]

## Sheet: Table S8.1
Gene Symbol	p (Corr)	p	FC ([SIRS Day 1] vs [Control Day 1])	Log FC ([SIRS Day 1] vs [Control Day 1])	FC (abs) ([SIRS Day 1] vs [Control Day 1])	Regulation ([SIRS Day 1] vs [Control Day 1])	FC ([SIRS Day 3] vs [Control Day 1])	Log FC ([SIRS Day 3] vs [Control Day 1])	FC (abs) ([SIRS Day 3] vs [Control Day 1])	Regulation ([SIRS Day 3] vs [Control Day 1])	FC ([SIRS Resolved Day 3] vs [Control Day 1])	Log FC ([SIRS Resolved Day 3] vs [Control Day 1])	FC (abs) ([SIRS Resolved Day 3] vs [Control Day 1])	Regulation ([SIRS Resolved Day 3] vs [Control Day 1])	FC ([Sepsis Day 1] vs [Control Day 1])	Log FC ([Sepsis Day 1] vs [Control Day 1])	FC (abs) ([Sepsis Day 1] vs [Control Day 1])	Regulation ([Sepsis Day 1] vs [Control Day 1])	FC ([Sepsis Day 3] vs [Control Day 1])	Log FC ([Sepsis Day 3] vs [Control Day 1])	FC (abs) ([Sepsis Day 3] vs [Control Day 1])	Regulation ([Sepsis Day 3] vs [Control Day 1])	FC ([Septic Shock Day 1] vs [Control Day 1])	Log FC ([Septic Shock Day 1] vs [Control Day 1])	FC (abs) ([Septic Shock Day 1] vs [Control Day 1])	Regulation ([Septic Shock Day 1] vs [Control Day 1])	FC ([Septic Shock Day 3] vs [Control Day 1])	Log FC ([Septic Shock Day 3] vs [Control Day 1])	FC (abs) ([Septic Shock Day 3] vs [Control Day 1])	Regulation ([Septic Shock Day 3] vs [Control Day 1])		Entrez Gene	UniGene ID	Target Description
MCEMP1	1.48217e-28	2.71088e-33	13.4242	3.74677	13.4242	up	10.1833	3.34813	10.1833	up	7.15914	2.83979	7.15914	up	13.4008	3.74425	13.4008	up	7.81476	2.9662	7.81476	up	18.108	4.17856	18.108	up	12.9827	3.69852	12.9827	up		199675	Hs.709539	gb:BF433657 /DB_XREF=gi:11445846 /DB_XREF=7q64d03.x1 /CLONE=IMAGE:3702965 /FEA=EST /CNT=13 /TID=Hs.178703.0 /TIER=ConsEnd /STK=6 /UG=Hs.178703 /UG_TITLE=ESTs
S100A12	1.64723e-23	6.02554e-28	5.81735	2.54036	5.81735	up	5.62462	2.49176	5.62462	up	4.53934	2.18248	4.53934	up	5.58649	2.48194	5.58649	up	4.4501	2.15384	4.4501	up	7.3105	2.86997	7.3105	up	5.98207	2.58065	5.98207	up		6283	Hs.19413	gb:NM_005621.1 /DB_XREF=gi:5032058 /GEN=S100A12 /FEA=FLmRNA /CNT=34 /TID=Hs.19413.0 /TIER=FL+Stack /STK=12 /UG=Hs.19413 /LL=6283 /DEF=Homo sapiens S100 calcium-binding protein A12 (calgranulin C) (S100A12), mRNA. /PROD=S100 calcium-binding protein A12 /FL=gb:D83664.1 gb:D49549.1 gb:NM_005621.1
CYSTM1	1.63382e-19	8.96472e-24	6.67966	2.73977	6.67966	up	3.96369	1.98684	3.96369	up	3.20745	1.68143	3.20745	up	5.13889	2.36146	5.13889	up	3.33623	1.73822	3.33623	up	7.21272	2.85054	7.21272	up	5.27765	2.3999	5.27765	up		84418	Hs.529798	gb:AL522667 /DB_XREF=gi:12786160 /DB_XREF=AL522667 /CLONE=CS0DB009YK05 (5 prime) /FEA=mRNA /CNT=167 /TID=Hs.323512.0 /TIER=Stack /STK=74 /UG=Hs.323512 /UG_TITLE=Homo sapiens mRNA for putative nuclear protein (ORF1-FL49)
ANXA3	3.47798e-19	3.46724e-23	14.7618	3.88379	14.7618	up	8.52327	3.09141	8.52327	up	8.70379	3.12164	8.70379	up	13.0679	3.70796	13.0679	up	9.24104	3.20806	9.24104	up	16.312	4.02786	16.312	up	11.6175	3.53823	11.6175	up		306	Hs.480042	gb:M63310.1 /DB_XREF=gi:178696 /GEN=ANX3 /FEA=FLmRNA /CNT=127 /TID=Hs.1378.0 /TIER=FL /STK=0 /UG=Hs.1378 /LL=306 /DEF=Human 1,2-cyclic-inositol-phosphate phosphodiesterase (ANX3) mRNA, complete cds. /PROD=1,2-cyclic-inositol-phosphate phosphodiesterase /FL=gb:BC000871.1 gb:M63310.1 gb:M20560.1 gb:NM_005139.1
MYBL1	3.47798e-19	3.23686e-23	-5.71793	-2.51549	5.71793	down	-7.92589	-2.98657	7.92589	down	-6.18541	-2.62887	6.18541	down	-10.8612	-3.44111	10.8612	down	-7.97554	-2.99558	7.97554	down	-11.3338	-3.50256	11.3338	down	-13.753	-3.78168	13.753	down		4603	Hs.445898	gb:AW592266 /DB_XREF=gi:7279443 /DB_XREF=hf48e04.x1 /CLONE=IMAGE:2935134 /FEA=mRNA /CNT=41 /TID=Hs.300592.0 /TIER=Stack /STK=15 /UG=Hs.300592 /LL=4603 /UG_GENE=MYBL1 /UG_TITLE=v-myb avian myeloblastosis viral oncogene homolog-like 1
DYSF	3.47798e-19	4.45283e-23	4.4206	2.14424	4.4206	up	4.06391	2.02287	4.06391	up	3.31003	1.72685	3.31003	up	5.29869	2.40564	5.29869	up	3.36794	1.75187	3.36794	up	5.31335	2.40962	5.31335	up	5.85756	2.5503	5.85756	up		8291	Hs.252180	gb:NM_003494.1 /DB_XREF=gi:4503430 /GEN=DYSF /FEA=FLmRNA /CNT=68 /TID=Hs.143897.0 /TIER=FL /STK=0 /UG=Hs.143897 /LL=8291 /DEF=Homo sapiens dysferlin, limb girdle muscular dystrophy 2B (autosomal recessive) (DYSF), mRNA. /PROD=dysferlin /FL=gb:AF075575.1 gb:NM_003494.1
GPR84	3.47798e-19	4.06616e-23	8.57358	3.0999	8.57358	up	3.91881	1.97042	3.91881	up	2.96777	1.56938	2.96777	up	7.69123	2.94321	7.69123	up	3.62045	1.85617	3.62045	up	12.1414	3.60186	12.1414	up	7.66091	2.93752	7.66091	up		53831	Hs.306199	gb:AF237762.1 /DB_XREF=gi:12711470 /GEN=GPR84 /FEA=FLmRNA /CNT=17 /TID=Hs.306199.0 /TIER=FL+Stack /STK=11 /UG=Hs.306199 /LL=53831 /DEF=Homo sapiens orphan G protein-coupled receptor 84 (GPR84) mRNA, complete cds. /PROD=orphan G protein-coupled receptor 84 /FL=gb:AF282693.1 gb:NM_020370.1 gb:AF237762.1
KLRF1	4.03129e-19	6.63586e-23	-4.25358	-2.08868	4.25358	down	-6.77377	-2.75996	6.77377	down	-5.68361	-2.50681	5.68361	down	-8.14106	-3.02522	8.14106	down	-6.67648	-2.73909	6.67648	down	-9.5708	-3.25864	9.5708	down	-11.5771	-3.5332	11.5771	down		51348	Hs.183125	gb:NM_016523.1 /DB_XREF=gi:7705573 /GEN=KLRF1 /FEA=FLmRNA /CNT=5 /TID=Hs.183125.0 /TIER=FL /STK=3 /UG=Hs.183125 /LL=51348 /DEF=Homo sapiens killer cell lectin-like receptor F1 (KLRF1), mRNA. /PROD=killer cell lectin-like receptor F1 /FL=gb:NM_016523.1 gb:AF175206.1
KIF1B	4.03129e-19	6.32814e-23	4.77694	2.25609	4.77694	up	4.52916	2.17924	4.52916	up	3.18177	1.66983	3.18177	up	4.6619	2.22092	4.6619	up	3.04645	1.60713	3.04645	up	5.45434	2.4474	5.45434	up	5.10566	2.3521	5.10566	up		23095	Hs.97858	gb:AK023184.1 /DB_XREF=gi:10434997 /FEA=mRNA /CNT=48 /TID=Hs.32580.0 /TIER=Stack /STK=17 /UG=Hs.32580 /LL=57598 /UG_GENE=KIAA1448 /UG_TITLE=KIAA1448 protein /DEF=Homo sapiens cDNA FLJ13122 fis, clone NT2RP3002688, weakly similar to Mouse mRNA for kinesin-like protein (Kif1b).
S100A9	6.57098e-19	1.26309e-22	2.4754	1.30766	2.4754	up	2.56039	1.35636	2.56039	up	2.30191	1.20283	2.30191	up	2.6131	1.38576	2.6131	up	2.31107	1.20856	2.31107	up	2.89057	1.53135	2.89057	up	2.72945	1.44861	2.72945	up		6280	Hs.112405	gb:NM_002965.2 /DB_XREF=gi:9845520 /GEN=S100A9 /FEA=FLmRNA /CNT=127 /TID=Hs.112405.0 /TIER=FL+Stack /STK=60 /UG=Hs.112405 /LL=6280 /DEF=Homo sapiens S100 calcium-binding protein A9 (calgranulin B) (S100A9), mRNA. /PROD=S100 calcium-binding protein A9 /FL=gb:NM_002965.2 gb:M26311.1
CD177	6.57098e-19	1.32201e-22	18.1311	4.18039	18.1311	up	13.2591	3.72891	13.2591	up	9.77068	3.28846	9.77068	up	21.325	4.41447	21.325	up	12.2169	3.61081	12.2169	up	33.0489	5.04653	33.0489	up	29.2979	4.87273	29.2979	up		57126	Hs.232165	gb:NM_020406.1 /DB_XREF=gi:9966888 /GEN=PRV1 /FEA=FLmRNA /CNT=28 /TID=Hs.232165.0 /TIER=FL /STK=0 /UG=Hs.232165 /LL=57126 /DEF=Homo sapiens polycythemia rubra vera 1; cell surface receptor (PRV1), mRNA. /PROD=polycythemia rubra vera 1; cell surfacereceptor /FL=gb:NM_020406.1 gb:AF146747.1
ANKRD22	8.37553e-18	1.83825e-21	8.72969	3.12593	8.72969	up	5.19255	2.37644	5.19255	up	2.9298	1.5508	2.9298	up	9.14446	3.1929	9.14446	up	4.50058	2.17011	4.50058	up	15.333	3.93857	15.333	up	8.31085	3.055	8.31085	up		118932	Hs.217484	gb:AI925518 /DB_XREF=gi:5661482 /DB_XREF=wo31e07.x1 /CLONE=IMAGE:2456964 /FEA=EST /CNT=13 /TID=Hs.268362.0 /TIER=ConsEnd /STK=1 /UG=Hs.268362 /UG_TITLE=ESTs, Weakly similar to hypothetical protein (H.sapiens)
S100A8	1.03281e-17	2.45569e-21	2.08205	1.058	2.08205	up	2.07499	1.0531	2.07499	up	1.99855	0.998951	1.99855	up	2.08043	1.05688	2.08043	up	1.98083	0.986109	1.98083	up	2.30289	1.20345	2.30289	up	2.10792	1.07582	2.10792	up		6279	Hs.416073	gb:NM_002964.2 /DB_XREF=gi:9845519 /GEN=S100A8 /FEA=FLmRNA /CNT=257 /TID=Hs.100000.0 /TIER=FL+Stack /STK=93 /UG=Hs.100000 /LL=6279 /DEF=Homo sapiens S100 calcium-binding protein A8 (calgranulin A) (S100A8), mRNA. /PROD=S100 calcium-binding protein A8 /FL=gb:NM_002964.2
XCL1	1.36415e-17	3.49303e-21	-3.50156	-1.808	3.50156	down	-3.90256	-1.96442	3.90256	down	-4.06636	-2.02374	4.06636	down	-4.86516	-2.28249	4.86516	down	-3.93798	-1.97746	3.93798	down	-5.07974	-2.34475	5.07974	down	-5.61473	-2.48922	5.61473	down		6375	Hs.458346///Hs.546295	gb:U23772.1 /DB_XREF=gi:902001 /FEA=FLmRNA /CNT=25 /TID=Hs.3195.0 /TIER=FL /STK=5 /UG=Hs.3195 /LL=6375 /UG_GENE=SCYC1 /DEF=Human lymphotactin precursor mRNA, complete cds. /PROD=lymphotactin precursor /FL=gb:U23772.1 gb:NM_002995.1 gb:D43768.1
SH2D1B	1.37309e-17	3.76706e-21	-2.82441	-1.49795	2.82441	down	-4.835	-2.27352	4.835	down	-3.79495	-1.92408	3.79495	down	-4.40132	-2.13794	4.40132	down	-3.8056	-1.92812	3.8056	down	-4.57229	-2.19292	4.57229	down	-5.24231	-2.3902	5.24231	down		117157	Hs.350581	gb:BC022407.1 /DB_XREF=gi:18490408 /TID=Hs2.350581.1 /CNT=11 /FEA=FLmRNA /TIER=FL /STK=1 /LL=117157 /UG_GENE=EAT2 /UG=Hs.350581 /DEF=Homo sapiens, SH2 domain-containing molecule EAT2, clone MGC:24157 IMAGE:4717041, mRNA, complete cds. /PROD=SH2 domain-containing molecule EAT2 /FL=gb:AF484964.1 gb:NM_053282.1 gb:AF256653.1 gb:BC022407.1 gb:AF403479.1
CD160	1.37471e-17	4.47173e-21	-2.42002	-1.27502	2.42002	down	-3.3546	-1.74614	3.3546	down	-2.97183	-1.57135	2.97183	down	-3.3194	-1.73092	3.3194	down	-3.02264	-1.59581	3.02264	down	-4.00158	-2.00057	4.00158	down	-4.24369	-2.08532	4.24369	down		11126	Hs.740780	gb:NM_007053.1 /DB_XREF=gi:5901909 /GEN=BY55 /FEA=FLmRNA /CNT=4 /TID=Hs.81743.0 /TIER=FL /STK=2 /UG=Hs.81743 /LL=11126 /DEF=Homo sapiens natural killer cell receptor, immunoglobulin superfamily member (BY55), mRNA. /PROD=natural killer cell receptor, immunoglobulinsuperfamily member /FL=gb:NM_007053.1 gb:AF060981.1
IRAK3	1.37471e-17	4.52579e-21	5.24714	2.39153	5.24714	up	5.00154	2.32237	5.00154	up	4.67228	2.22413	4.67228	up	5.98878	2.58226	5.98878	up	3.9378	1.97739	3.9378	up	6.76162	2.75737	6.76162	up	5.76891	2.5283	5.76891	up		11213	Hs.369265	gb:NM_007199.1 /DB_XREF=gi:6005791 /GEN=IRAK-M /FEA=FLmRNA /CNT=14 /TID=Hs.268552.0 /TIER=FL /STK=0 /UG=Hs.268552 /LL=11213 /DEF=Homo sapiens interleukin-1 receptor-associated kinase M (IRAK-M), mRNA. /PROD=interleukin-1 receptor-associated kinase M /FL=gb:AF113136.1 gb:NM_007199.1
KIF1B	1.37471e-17	4.31024e-21	4.41549	2.14257	4.41549	up	2.80169	1.4863	2.80169	up	2.50815	1.32662	2.50815	up	3.56365	1.83335	3.56365	up	2.55157	1.35139	2.55157	up	4.27464	2.0958	4.27464	up	3.26371	1.70651	3.26371	up		23095	Hs.97858	gb:AL135264 /DB_XREF=gi:6603451 /DB_XREF=DKFZp762O2013_r1 /CLONE=DKFZp762O2013 /FEA=EST /CNT=92 /TID=Hs.14434.0 /TIER=Stack /STK=48 /UG=Hs.14434 /UG_TITLE=ESTs
AGAP11///AGAP4///AGAP6///AGAP7P///CTGLF12P///LOC101060581///LOC105369258	1.55968e-17	5.63651e-21	-1.38979	-0.474864	1.38979	down	-1.38928	-0.474341	1.38928	down	-1.25016	-0.322118	1.25016	down	-1.4819	-0.567449	1.4819	down	-1.43103	-0.517057	1.43103	down	-1.69311	-0.759671	1.69311	down	-1.54672	-0.629214	1.54672	down		119016///119385///414189///414224///653268///101060581///105369258	Hs.511787///Hs.536158///Hs.536192///Hs.656384	gb:AI826075 /DB_XREF=gi:5446746 /DB_XREF=wk28c04.x1 /CLONE=IMAGE:2413638 /FEA=EST /CNT=62 /TID=Hs.297681.5 /TIER=Stack /STK=33 /UG=Hs.297681 /LL=5265 /UG_GENE=SERPINA1 /UG_TITLE=serine (or cysteine) proteinase inhibitor, clade A (alpha-1 antiproteinase, antitrypsin), member 1
SLC2A14///SLC2A3	1.55968e-17	5.70526e-21	4.60032	2.20173	4.60032	up	4.3276	2.11357	4.3276	up	3.60773	1.85109	3.60773	up	4.94219	2.30515	4.94219	up	3.32754	1.73445	3.32754	up	5.68746	2.50778	5.68746	up	5.37529	2.42634	5.37529	up		6515///144195	Hs.419240///Hs.655169	gb:AA778684 /DB_XREF=gi:2838015 /DB_XREF=af87g07.s1 /CLONE=1049052 /FEA=EST /CNT=12 /TID=Hs.7594.1 /TIER=Stack /STK=11 /UG=Hs.7594 /LL=6515 /UG_GENE=SLC2A3 /UG_TITLE=solute carrier family 2 (facilitated glucose transporter), member 3
FCER1A	2.86391e-17	1.09999e-20	-6.35876	-2.66875	6.35876	down	-9.08466	-3.18343	9.08466	down	-8.40641	-3.07149	8.40641	down	-12.0143	-3.58669	12.0143	down	-11.5656	-3.53177	11.5656	down	-16.3203	-4.02859	16.3203	down	-13.6468	-3.77049	13.6468	down		2205	Hs.897	gb:BC005912.1 /DB_XREF=gi:13543505 /FEA=FLmRNA /CNT=1 /TID=HsAffx.900757.955 /TIER=FL /STK=0 /DEF=Homo sapiens, Fc fragment of IgE, high affinity I, receptor for; alpha polypeptide, clone MGC:14507, mRNA, complete cds. /PROD=Fc fragment of IgE, high affinity I, receptorfor; alpha polypeptide /FL=gb:BC005912.1
KLRB1	4.70103e-17	1.89159e-20	-3.86156	-1.94918	3.86156	down	-3.85463	-1.94659	3.85463	down	-3.72991	-1.89914	3.72991	down	-5.546	-2.47145	5.546	down	-3.76568	-1.91291	3.76568	down	-6.02308	-2.5905	6.02308	down	-7.33881	-2.87555	7.33881	down		3820	Hs.169824	gb:NM_002258.1 /DB_XREF=gi:4504878 /GEN=KLRB1 /FEA=FLmRNA /CNT=16 /TID=Hs.169824.0 /TIER=FL /STK=0 /UG=Hs.169824 /LL=3820 /DEF=Homo sapiens killer cell lectin-like receptor subfamily B, member 1 (KLRB1), mRNA. /PROD=killer cell lectin-like receptor subfamily B,member 1 /FL=gb:NM_002258.1 gb:U11276.1
BMX	7.59241e-17	3.19388e-20	6.94276	2.79551	6.94276	up	3.5264	1.8182	3.5264	up	3.5416	1.8244	3.5416	up	6.49407	2.69912	6.49407	up	4.15171	2.05371	4.15171	up	8.07035	3.01263	8.07035	up	6.98082	2.8034	6.98082	up		660	Hs.495731	gb:NM_001721.1 /DB_XREF=gi:4502434 /GEN=BMX /FEA=FLmRNA /CNT=17 /TID=Hs.27372.0 /TIER=FL+Stack /STK=8 /UG=Hs.27372 /LL=660 /DEF=Homo sapiens BMX non-receptor tyrosine kinase (BMX), mRNA. /PROD=BMX non-receptor tyrosine kinase /FL=gb:NM_001721.1 gb:AF045459.1
XCL1///XCL2	7.60327e-17	3.33751e-20	-3.25957	-1.70468	3.25957	down	-3.15101	-1.65582	3.15101	down	-3.52094	-1.81596	3.52094	down	-4.23879	-2.08365	4.23879	down	-3.51742	-1.81452	3.51742	down	-4.36488	-2.12594	4.36488	down	-4.62724	-2.21015	4.62724	down		6375///6846	Hs.458346///Hs.546295	gb:NM_003175.1 /DB_XREF=gi:4506854 /GEN=SCYC2 /FEA=FLmRNA /CNT=2 /TID=Hs.174228.0 /TIER=FL /STK=0 /UG=Hs.174228 /LL=6846 /DEF=Homo sapiens small inducible cytokine subfamily C, member 2 (SCYC2), mRNA. /PROD=small inducible cytokine subfamily C, member 2 /FL=gb:NM_003175.1
CA4	1.1893e-16	5.43805e-20	6.977	2.80261	6.977	up	4.73349	2.2429	4.73349	up	3.32698	1.73421	3.32698	up	6.8592	2.77804	6.8592	up	4.63632	2.21298	4.63632	up	8.64281	3.1115	8.64281	up	7.97256	2.99504	7.97256	up		762	Hs.89485	gb:NM_000717.2 /DB_XREF=gi:9951925 /GEN=CA4 /FEA=FLmRNA /CNT=16 /TID=Hs.89485.0 /TIER=FL+Stack /STK=9 /UG=Hs.89485 /LL=762 /DEF=Homo sapiens carbonic anhydrase IV (CA4), mRNA. /PROD=carbonic anhydrase IV precursor /FL=gb:NM_000717.2 gb:M83670.1
PGD	1.23588e-16	5.87708e-20	3.55893	1.83144	3.55893	up	3.24229	1.69701	3.24229	up	3.06446	1.61563	3.06446	up	4.79025	2.2601	4.79025	up	3.25922	1.70453	3.25922	up	5.38833	2.42984	5.38833	up	5.39343	2.4312	5.39343	up		5226	Hs.464071	gb:NM_002631.1 /DB_XREF=gi:4505758 /GEN=PGD /FEA=FLmRNA /CNT=342 /TID=Hs.75888.0 /TIER=FL /STK=0 /UG=Hs.75888 /LL=5226 /DEF=Homo sapiens phosphogluconate dehydrogenase (PGD), mRNA. /PROD=phosphogluconate dehydrogenase /FL=gb:U30255.1 gb:NM_002631.1 gb:BC000368.1
CPEB4	1.56004e-16	7.70392e-20	2.57583	1.36504	2.57583	up	3.93053	1.97472	3.93053	up	3.04773	1.60773	3.04773	up	3.56717	1.83478	3.56717	up	2.62395	1.39174	2.62395	up	3.77268	1.91559	3.77268	up	3.95917	1.9852	3.95917	up		80315	Hs.127126	gb:AA772278 /DB_XREF=gi:2824061 /DB_XREF=ai42d03.s1 /CLONE=1359653 /FEA=mRNA /CNT=144 /TID=Hs.301444.0 /TIER=Stack /STK=10 /UG=Hs.301444 /LL=80315 /UG_GENE=KIAA1673 /UG_TITLE=KIAA1673
HP	1.70756e-16	8.7447e-20	8.07303	3.01311	8.07303	up	5.89367	2.55917	5.89367	up	4.2173	2.07632	4.2173	up	7.27801	2.86354	7.27801	up	5.07756	2.34414	5.07756	up	14.646	3.87243	14.646	up	8.55911	3.09746	8.55911	up		3240	Hs.513711///Hs.702099	gb:NM_005143.1 /DB_XREF=gi:4826761 /GEN=HP /FEA=FLmRNA /CNT=29 /TID=Hs.75990.0 /TIER=FL /STK=0 /UG=Hs.75990 /LL=3240 /DEF=Homo sapiens haptoglobin (HP), mRNA. /PROD=haptoglobin /FL=gb:K00422.1 gb:L29394.1 gb:NM_005143.1
CEACAM1	2.25011e-16	1.19347e-19	4.01792	2.00645	4.01792	up	2.60395	1.3807	2.60395	up	1.95914	0.97022	1.95914	up	4.08263	2.0295	4.08263	up	2.52274	1.33499	2.52274	up	6.42979	2.68477	6.42979	up	4.60588	2.20348	4.60588	up		634	Hs.512682	gb:NM_001712.1 /DB_XREF=gi:4502404 /GEN=CEACAM1 /FEA=FLmRNA /CNT=13 /TID=Hs.50964.0 /TIER=FL /STK=0 /UG=Hs.50964 /LL=634 /DEF=Homo sapiens carcinoembryonic antigen-related cell adhesion molecule 1 (biliary glycoprotein) (CEACAM1), mRNA. /PROD=carcinoembryonic antigen-related cell adhesionmolecule 1 (biliary glycoprotein) /FL=gb:NM_001712.1
EXOSC4	2.50547e-16	1.37474e-19	1.99761	0.998278	1.99761	up	1.97976	0.985324	1.97976	up	1.23191	0.300895	1.23191	up	2.00185	1.00133	2.00185	up	1.7397	0.79884	1.7397	up	3.07378	1.62002	3.07378	up	2.68028	1.42238	2.68028	up		54512	Hs.632041	gb:NM_019037.1 /DB_XREF=gi:9506688 /GEN=FLJ20591 /FEA=FLmRNA /CNT=66 /TID=Hs.97574.0 /TIER=FL+Stack /STK=34 /UG=Hs.97574 /LL=54512 /DEF=Homo sapiens hypothetical protein (FLJ20591), mRNA. /PROD=hypothetical protein /FL=gb:AF281133.1 gb:BC002777.1 gb:NM_019037.1
GYG1	3.7005e-16	2.09814e-19	5.68743	2.50778	5.68743	up	4.01168	2.00421	4.01168	up	3.28127	1.71425	3.28127	up	5.11363	2.35435	5.11363	up	3.73886	1.9026	3.73886	up	6.98196	2.80363	6.98196	up	5.58324	2.4811	5.58324	up		2992	Hs.477892	gb:AF087942.1 /DB_XREF=gi:5814084 /FEA=FLmRNA /CNT=1 /TID=Hs.174071.1 /TIER=FL /STK=0 /UG=Hs.174071 /LL=2992 /UG_GENE=GYG /DEF=Homo sapiens glycogenin-1L mRNA, complete cds. /PROD=glycogenin-1L /FL=gb:AF087942.1
MMP8	4.87685e-16	2.85431e-19	58.0621	5.85952	58.0621	up	33.9832	5.08675	33.9832	up	17.4446	4.12471	17.4446	up	33.388	5.06126	33.388	up	35.8762	5.16495	35.8762	up	117.466	6.8761	117.466	up	45.7586	5.51597	45.7586	up		4317	Hs.161839	gb:AW337833 /DB_XREF=gi:6834459 /DB_XREF=he11a05.x1 /CLONE=IMAGE:2918672 /FEA=EST /CNT=11 /TID=Hs.255877.0 /TIER=Stack /STK=10 /UG=Hs.255877 /UG_TITLE=ESTs
HP///HPR	6.62297e-16	3.9974e-19	8.67273	3.11649	8.67273	up	5.79415	2.5346	5.79415	up	4.10877	2.03871	4.10877	up	7.62485	2.93071	7.62485	up	5.15462	2.36587	5.15462	up	16.2415	4.02161	16.2415	up	9.06544	3.18038	9.06544	up		3240///3250	Hs.513711///Hs.655361///Hs.702099	gb:NM_020995.1 /DB_XREF=gi:10337588 /GEN=HPR /FEA=FLmRNA /CNT=12 /TID=Hs.328822.0 /TIER=FL /STK=0 /UG=Hs.328822 /LL=3250 /DEF=Homo sapiens haptoglobin-related protein (HPR), mRNA. /PROD=haptoglobin-related protein /FL=gb:NM_020995.1
GAS7	8.66898e-16	5.39086e-19	3.78431	1.92003	3.78431	up	2.80855	1.48983	2.80855	up	2.84889	1.5104	2.84889	up	4.9985	2.32149	4.9985	up	3.03231	1.60042	3.03231	up	4.81901	2.26874	4.81901	up	5.05725	2.33835	5.05725	up		8522	Hs.462214	gb:NM_003644.1 /DB_XREF=gi:4503920 /GEN=GAS7 /FEA=FLmRNA /CNT=3 /TID=Hs.226133.1 /TIER=FL /STK=0 /UG=Hs.226133 /LL=8522 /DEF=Homo sapiens growth arrest-specific 7 (GAS7), transcript variant a, mRNA. /PROD=growth arrest-specific 7 isoform a /FL=gb:NM_003644.1
CEACAM1	9.86971e-16	6.31806e-19	5.99839	2.58457	5.99839	up	3.70891	1.89099	3.70891	up	2.52536	1.33649	2.52536	up	4.94594	2.30624	4.94594	up	3.1994	1.6778	3.1994	up	8.94516	3.16111	8.94516	up	5.07334	2.34293	5.07334	up		634	Hs.512682	gb:X16354.1 /DB_XREF=gi:37197 /FEA=FLmRNA /CNT=94 /TID=Hs.50964.3 /TIER=Stack /STK=39 /UG=Hs.50964 /LL=634 /UG_GENE=CEACAM1 /DEF=Human mRNA for transmembrane carcinoembryonic antigen BGPa (formerly TM1-CEA). /PROD=TM1-CEA preprotein /FL=gb:J03858.1
WDFY3	1.28723e-15	8.47556e-19	3.97784	1.99199	3.97784	up	2.79367	1.48216	2.79367	up	2.87123	1.52167	2.87123	up	3.81674	1.93234	3.81674	up	2.67201	1.41792	2.67201	up	3.83711	1.94002	3.83711	up	3.88783	1.95897	3.88783	up		23001	Hs.480116	gb:AI806395 /DB_XREF=gi:5392961 /DB_XREF=wf27d05.x1 /CLONE=IMAGE:2356809 /FEA=mRNA /CNT=134 /TID=Hs.198135.0 /TIER=Stack /STK=14 /UG=Hs.198135 /LL=23001 /UG_GENE=KIAA0993 /UG_TITLE=KIAA0993 protein
GYG1	1.30555e-15	8.93408e-19	6.20843	2.63423	6.20843	up	3.75306	1.90807	3.75306	up	3.62462	1.85783	3.62462	up	5.71282	2.5142	5.71282	up	4.09261	2.03302	4.09261	up	7.36106	2.87991	7.36106	up	6.3025	2.65593	6.3025	up		2992	Hs.477892	gb:NM_004130.1 /DB_XREF=gi:4758491 /GEN=GYG /FEA=FLmRNA /CNT=244 /TID=Hs.174071.0 /TIER=FL /STK=0 /UG=Hs.174071 /LL=2992 /DEF=Homo sapiens glycogenin (GYG), mRNA. /PROD=glycogenin /FL=gb:U44131.1 gb:NM_004130.1 gb:BC000033.1 gb:U31525.1
CLEC5A	1.30555e-15	9.07381e-19	7.9365	2.9885	7.9365	up	3.5494	1.82757	3.5494	up	2.93905	1.55535	2.93905	up	4.96398	2.3115	4.96398	up	4.2428	2.08502	4.2428	up	10.95	3.45286	10.95	up	5.23534	2.38828	5.23534	up		23601	Hs.446235	gb:NM_013252.1 /DB_XREF=gi:10281668 /GEN=CLECSF5 /FEA=FLmRNA /CNT=17 /TID=Hs.126355.0 /TIER=FL /STK=4 /UG=Hs.126355 /LL=23601 /DEF=Homo sapiens C-type (calcium dependent, carbohydrate-recognition domain) lectin, superfamily member 5 (CLECSF5), mRNA. /PROD=C-type (calcium dependent,carbohydrate-recognition domain) lectin, superfamilymember 5 /FL=gb:AF139768.1 gb:NM_013252.1
UPP1	1.54677e-15	1.10332e-18	3.22332	1.68855	3.22332	up	2.60193	1.37958	2.60193	up	1.96319	0.973198	1.96319	up	3.30347	1.72398	3.30347	up	2.40693	1.26719	2.40693	up	4.10704	2.0381	4.10704	up	3.67652	1.87834	3.67652	up		7378	Hs.488240	gb:NM_003364.1 /DB_XREF=gi:4507838 /GEN=UP /FEA=FLmRNA /CNT=160 /TID=Hs.77573.0 /TIER=FL+Stack /STK=91 /UG=Hs.77573 /LL=7378 /DEF=Homo sapiens uridine phosphorylase (UP), mRNA. /PROD=uridine phosphorylase /FL=gb:NM_003364.1 gb:BC001405.1
MAFG	2.25091e-15	1.64676e-18	2.26425	1.17903	2.26425	up	1.42101	0.506912	1.42101	up	1.52493	0.608743	1.52493	up	2.07058	1.05004	2.07058	up	1.79846	0.846761	1.79846	up	2.37574	1.24838	2.37574	up	2.02924	1.02094	2.02924	up		4097	Hs.744113	gb:NM_002359.1 /DB_XREF=gi:4505072 /GEN=MAFG /FEA=FLmRNA /CNT=51 /TID=Hs.252229.0 /TIER=FL /STK=0 /UG=Hs.252229 /LL=4097 /DEF=Homo sapiens v-maf musculoaponeurotic fibrosarcoma (avian) oncogene family, protein G (MAFG), mRNA. /PROD=v-maf musculoaponeurotic fibrosarcoma (avian)oncogene family, protein G /FL=gb:NM_002359.1 gb:AF059195.1
HK3	3.39991e-15	2.56999e-18	4.21713	2.07626	4.21713	up	2.68304	1.42387	2.68304	up	2.64727	1.40451	2.64727	up	4.41958	2.14391	4.41958	up	2.73484	1.45146	2.73484	up	5.14614	2.36349	5.14614	up	4.60106	2.20197	4.60106	up		3101	Hs.411695	gb:NM_002115.1 /DB_XREF=gi:4504394 /GEN=HK3 /FEA=FLmRNA /CNT=20 /TID=Hs.159237.0 /TIER=FL /STK=7 /UG=Hs.159237 /LL=3101 /DEF=Homo sapiens hexokinase 3 (white cell) (HK3), mRNA. /PROD=hexokinase 3 (white cell) /FL=gb:NM_002115.1 gb:U51333.1
	3.39991e-15	2.61173e-18	1.47038	0.55619	1.47038	up	1.43487	0.520918	1.43487	up	1.4859	0.571339	1.4859	up	1.49781	0.582852	1.49781	up	1.58788	0.667103	1.58788	up	1.7368	0.796432	1.7368	up	1.75944	0.815117	1.75944	up				gb:AL035604 /DB_XREF=gi:5002622 /FEA=DNA_1 /CNT=1 /TID=Hs.247894.0 /TIER=ConsEnd /STK=0 /UG=Hs.247894 /UG_TITLE=Human DNA sequence from clone 38C16 on chromosome 6q22.33-24.1. Contains GAPD (glyceraldehyde 3-phosphate dehydrogenease, GAPDH) and HMG1 (high mobility group protein 1) pseudogenes, ESTs, STSs and GSSs /DEF=Human DNA sequence from clone 38C16 on chromosome 6q22.33-24.1. Contains GAPD (…
CEACAM1	3.62338e-15	2.84966e-18	3.13927	1.65043	3.13927	up	1.95606	0.967947	1.95606	up	1.66977	0.739653	1.66977	up	2.92655	1.5492	2.92655	up	1.97633	0.982826	1.97633	up	4.46841	2.15976	4.46841	up	3.03999	1.60407	3.03999	up		634	Hs.512682	gb:D12502.1 /DB_XREF=gi:219494 /GEN=BGP /FEA=FLmRNA /CNT=2 /TID=Hs.50964.5 /TIER=FL /STK=0 /UG=Hs.50964 /LL=634 /DEF=Human mRNA for biliary glycoprotein, complete cds. /PROD=biliary glycoprotein /FL=gb:D12502.1
PTGDR	4.01238e-15	3.22898e-18	-1.45492	-0.540942	1.45492	down	-1.69329	-0.759829	1.69329	down	-1.57035	-0.65109	1.57035	down	-1.79328	-0.8426	1.79328	down	-1.61448	-0.69107	1.61448	down	-1.79644	-0.845137	1.79644	down	-1.8294	-0.871371	1.8294	down		5729	Hs.306831	gb:AK026202.1 /DB_XREF=gi:10438975 /FEA=mRNA /CNT=3 /TID=Hs.306831.0 /TIER=ConsEnd /STK=0 /UG=Hs.306831 /UG_TITLE=Homo sapiens cDNA: FLJ22549 fis, clone HSI00650 /DEF=Homo sapiens cDNA: FLJ22549 fis, clone HSI00650.
RAB20	4.10578e-15	3.37924e-18	1.79395	0.843143	1.79395	up	2.04866	1.03468	2.04866	up	1.4722	0.557969	1.4722	up	2.39525	1.26017	2.39525	up	1.79824	0.846584	1.79824	up	3.28161	1.7144	3.28161	up	2.85859	1.51531	2.85859	up		55647	Hs.743563	gb:NM_017817.1 /DB_XREF=gi:8923400 /GEN=FLJ20429 /FEA=FLmRNA /CNT=29 /TID=Hs.179791.0 /TIER=FL /STK=0 /UG=Hs.179791 /LL=55647 /DEF=Homo sapiens hypothetical protein FLJ20429 (FLJ20429), mRNA. /PROD=hypothetical protein FLJ20429 /FL=gb:NM_017817.1
STOM	4.11198e-15	3.50687e-18	2.54354	1.34684	2.54354	up	2.43818	1.2858	2.43818	up	2.41325	1.27098	2.41325	up	2.99765	1.58383	2.99765	up	2.63093	1.39557	2.63093	up	4.00506	2.00182	4.00506	up	3.89344	1.96104	3.89344	up		2040	Hs.253903	gb:M81635.1 /DB_XREF=gi:181183 /GEN=stomatin peptide /FEA=FLmRNA /CNT=443 /TID=Hs.160483.0 /TIER=FL+Stack /STK=166 /UG=Hs.160483 /LL=2040 /DEF=Homo sapiens erythrocyte membrane protein mRNA, complete cds. /PROD=stomatin peptide /FL=gb:M81635.1 gb:NM_004099.1
ARG1	4.11198e-15	3.53476e-18	15.0888	3.9154	15.0888	up	13.8705	3.79395	13.8705	up	11.3561	3.50539	11.3561	up	15.3281	3.9381	15.3281	up	11.4816	3.52125	11.4816	up	22.1555	4.46959	22.1555	up	17.4167	4.1224	17.4167	up		383	Hs.440934	gb:NM_000045.2 /DB_XREF=gi:10947138 /GEN=ARG1 /FEA=FLmRNA /CNT=36 /TID=Hs.289057.0 /TIER=FL+Stack /STK=13 /UG=Hs.289057 /LL=383 /DEF=Homo sapiens arginase, liver (ARG1), mRNA. /PROD=arginase, type I /FL=gb:M14502.1 gb:NM_000045.2
GBA///GBAP1	4.1437e-15	3.63782e-18	1.65195	0.724172	1.65195	up	1.67853	0.7472	1.67853	up	1.50726	0.591931	1.50726	up	1.988	0.991317	1.988	up	1.71581	0.778886	1.71581	up	2.56472	1.3588	2.56472	up	2.59296	1.3746	2.59296	up		2629///2630	Hs.282997///Hs.719930	gb:K02920.1 /DB_XREF=gi:183021 /FEA=FLmRNA /CNT=170 /TID=Hs.282997.0 /TIER=FL /STK=0 /UG=Hs.282997 /LL=2629 /UG_GENE=GBA /UG_TITLE=glucosidase, beta; acid (includes glucosylceramidase) /DEF=Human lysosomal glucocerebrosidase mRNA, complete cds. /FL=gb:NM_000157.1 gb:K02920.1 gb:M19285.1 gb:M16328.1 gb:D13286.1 gb:BC003356.1
ANKRD22	4.96385e-15	4.44863e-18	4.11558	2.04109	4.11558	up	2.30339	1.20376	2.30339	up	1.84197	0.881249	1.84197	up	4.31667	2.10992	4.31667	up	2.41518	1.27213	2.41518	up	6.32759	2.66166	6.32759	up	3.66758	1.87483	3.66758	up		118932	Hs.217484	gb:AI097229 /DB_XREF=gi:3446811 /DB_XREF=qb88d09.x1 /CLONE=IMAGE:1707185 /FEA=EST /CNT=7 /TID=Hs.217484.0 /TIER=ConsEnd /STK=3 /UG=Hs.217484 /UG_TITLE=ESTs, Weakly similar to ALU1_HUMAN ALU SUBFAMILY J SEQUENCE CONTAMINATION WARNING ENTRY (H.sapiens)
SORT1	5.02947e-15	4.59943e-18	3.26484	1.70701	3.26484	up	2.45276	1.29441	2.45276	up	1.95764	0.969115	1.95764	up	3.56661	1.83455	3.56661	up	2.11043	1.07753	2.11043	up	4.41429	2.14218	4.41429	up	3.40898	1.76934	3.40898	up		6272	Hs.485195	gb:BF447105 /DB_XREF=gi:11512243 /DB_XREF=7p49d07.x1 /CLONE=IMAGE:3649189 /FEA=EST /CNT=86 /TID=Hs.281706.1 /TIER=Stack /STK=9 /UG=Hs.281706 /LL=6272 /UG_GENE=SORT1 /UG_TITLE=sortilin 1
SOCS3	5.113e-15	4.76933e-18	5.14446	2.36302	5.14446	up	4.69013	2.22963	4.69013	up	3.02953	1.59909	3.02953	up	5.22461	2.38532	5.22461	up	3.71965	1.89517	3.71965	up	7.76633	2.95723	7.76633	up	5.75467	2.52473	5.75467	up		9021	Hs.527973	gb:AI244908 /DB_XREF=gi:3840305 /DB_XREF=qj98g11.x1 /CLONE=IMAGE:1867556 /FEA=EST /CNT=26 /TID=Hs.311405.0 /TIER=Stack /STK=22 /UG=Hs.311405 /UG_TITLE=ESTs
EXOSC4	5.65213e-15	5.3756e-18	1.81784	0.862229	1.81784	up	1.87851	0.909587	1.87851	up	1.2301	0.29878	1.2301	up	1.92357	0.943785	1.92357	up	1.56155	0.642976	1.56155	up	2.83071	1.50116	2.83071	up	2.44072	1.28731	2.44072	up		54512	Hs.632041	Cluster Incl. AL039469:DKFZp434P0110_s1 Homo sapiens cDNA, 3 end /clone=DKFZp434P0110 /clone_end=3' /gb=AL039469 /gi=5408517 /ug=Hs.97574 /len=888
FLOT1	7.01167e-15	6.79686e-18	2.31809	1.21294	2.31809	up	2.06708	1.04759	2.06708	up	1.69959	0.765189	1.69959	up	2.6106	1.38438	2.6106	up	2.04832	1.03444	2.04832	up	3.04621	1.60701	3.04621	up	2.86765	1.51987	2.86765	up		10211	Hs.179986	gb:AF117234.1 /DB_XREF=gi:6563241 /FEA=FLmRNA /CNT=17 /TID=Hs.179986.1 /TIER=FL /STK=0 /UG=Hs.179986 /LL=10211 /UG_GENE=FLOT1 /DEF=Homo sapiens flotillin mRNA, complete cds. /PROD=flotillin /FL=gb:AF117234.1
STOM	7.08889e-15	7.005e-18	2.96492	1.56799	2.96492	up	2.00475	1.00342	2.00475	up	2.43332	1.28292	2.43332	up	3.29352	1.71963	3.29352	up	2.66194	1.41248	2.66194	up	4.49235	2.16747	4.49235	up	3.64361	1.86537	3.64361	up		2040	Hs.253903	gb:AI537887 /DB_XREF=gi:4452022 /DB_XREF=tp32g06.x1 /CLONE=IMAGE:2189530 /FEA=FLmRNA /CNT=443 /TID=Hs.160483.0 /TIER=Stack /STK=16 /UG=Hs.160483 /LL=2040 /UG_GENE=EPB72 /UG_TITLE=erythrocyte membrane protein band 7.2 (stomatin) /FL=gb:M81635.1 gb:NM_004099.1
YME1L1	7.08889e-15	7.26069e-18	-4.21086	-2.07411	4.21086	down	-4.94449	-2.30582	4.94449	down	-4.2312	-2.08107	4.2312	down	-6.36377	-2.66988	6.36377	down	-4.47215	-2.16097	4.47215	down	-6.70312	-2.74483	6.70312	down	-7.132	-2.83431	7.132	down		10730	Hs.74647	gb:AW007751 /DB_XREF=gi:5856529 /DB_XREF=wt68f10.x1 /CLONE=IMAGE:2512651 /FEA=mRNA /CNT=27 /TID=Hs.2014.1 /TIER=Stack /STK=11 /UG=Hs.2014 /LL=6964 /UG_GENE=TRD@ /UG_TITLE=T cell receptor delta locus
	7.08889e-15	7.16325e-18	-1.5858	-0.665212	1.5858	down	-2.31366	-1.21018	2.31366	down	-2.00248	-1.00179	2.00248	down	-2.3201	-1.21419	2.3201	down	-1.95118	-0.964345	1.95118	down	-2.32155	-1.21509	2.32155	down	-2.46872	-1.30377	2.46872	down			Hs.406847	gb:AK024584.1 /DB_XREF=gi:10436896 /FEA=mRNA /CNT=3 /TID=Hs.203076.0 /TIER=ConsEnd /STK=0 /UG=Hs.203076 /UG_TITLE=Homo sapiens cDNA: FLJ20931 fis, clone ADSE01282 /DEF=Homo sapiens cDNA: FLJ20931 fis, clone ADSE01282.
MMP9	7.15067e-15	7.45475e-18	12.8004	3.67812	12.8004	up	6.97331	2.80184	6.97331	up	6.85001	2.77611	6.85001	up	13.846	3.7914	13.846	up	10.3835	3.37622	10.3835	up	13.8622	3.79308	13.8622	up	17.7402	4.14895	17.7402	up		4318	Hs.297413	gb:NM_004994.1 /DB_XREF=gi:4826835 /GEN=MMP9 /FEA=FLmRNA /CNT=130 /TID=Hs.151738.0 /TIER=FL+Stack /STK=42 /UG=Hs.151738 /LL=4318 /DEF=Homo sapiens matrix metalloproteinase 9 (gelatinase B, 92kD gelatinase, 92kD type IV collagenase) (MMP9), mRNA. /PROD=matrix metalloproteinase 9 preproprotein /FL=gb:J05070.1 gb:NM_004994.1
USP45	7.48614e-15	7.9414e-18	-1.70866	-0.772862	1.70866	down	-2.07924	-1.05605	2.07924	down	-1.61282	-0.689582	1.61282	down	-2.04573	-1.03262	2.04573	down	-1.592	-0.670837	1.592	down	-2.0646	-1.04586	2.0646	down	-2.09687	-1.06824	2.09687	down		85015	Hs.143410	gb:AW195800 /DB_XREF=gi:6475020 /DB_XREF=xn41b09.x1 /CLONE=IMAGE:2696249 /FEA=EST /CNT=10 /TID=Hs.149401.0 /TIER=ConsEnd /STK=2 /UG=Hs.149401 /UG_TITLE=ESTs
TRDC	8.38698e-15	9.05042e-18	-5.36879	-2.4246	5.36879	down	-5.74208	-2.52157	5.74208	down	-5.07263	-2.34273	5.07263	down	-8.43951	-3.07716	8.43951	down	-5.55702	-2.47431	5.55702	down	-9.92131	-3.31053	9.92131	down	-10.3694	-3.37426	10.3694	down		28526	Hs.74647	gb:X06557.1 /DB_XREF=gi:37003 /FEA=mRNA /CNT=2 /TID=Hs.2014.2 /TIER=ConsEnd /STK=0 /UG=Hs.2014 /LL=6964 /UG_GENE=TRD@ /UG_TITLE=T cell receptor delta locus /DEF=Human mRNA for TCR-delta chain.
PADI4	9.79768e-15	1.07519e-17	3.94637	1.98053	3.94637	up	2.92437	1.54813	2.92437	up	2.86654	1.51931	2.86654	up	4.63658	2.21306	4.63658	up	3.6095	1.8518	3.6095	up	5.36773	2.42431	5.36773	up	5.06546	2.34069	5.06546	up		23569	Hs.522969	gb:NM_012387.1 /DB_XREF=gi:6912575 /GEN=PAD /FEA=FLmRNA /CNT=18 /TID=Hs.117232.0 /TIER=FL /STK=5 /UG=Hs.117232 /LL=23569 /DEF=Homo sapiens peptidyl arginine deiminase, type V (PAD), mRNA. /PROD=peptidyl arginine deiminase, type V /FL=gb:NM_012387.1 gb:AB017919.1
USB1	1.11415e-14	1.24303e-17	1.98762	0.991042	1.98762	up	1.74486	0.803108	1.74486	up	1.79524	0.84418	1.79524	up	2.13653	1.09527	2.13653	up	1.7696	0.823425	1.7696	up	2.35613	1.23642	2.35613	up	2.47208	1.30572	2.47208	up		79650	Hs.408702	gb:BC006291.1 /DB_XREF=gi:13623388 /TID=Hs2.25303.2 /CNT=10 /FEA=FLmRNA /TIER=FL /STK=7 /LL=79650 /UG_GENE=FLJ13154 /UG=Hs.25303 /UG_TITLE=hypothetical protein FLJ13154 /DEF=Homo sapiens, hypothetical protein FLJ13154, clone MGC:10683 IMAGE:4025993, mRNA, complete cds. /FL=gb:BC006291.1
RGL4	1.2355e-14	1.40102e-17	5.19421	2.37691	5.19421	up	2.81777	1.49455	2.81777	up	2.40828	1.26801	2.40828	up	4.31194	2.10834	4.31194	up	2.73425	1.45115	2.73425	up	6.48472	2.69704	6.48472	up	4.82758	2.2713	4.82758	up		266747	Hs.658997	gb:AI867408 /DB_XREF=gi:5540424 /DB_XREF=wb71a07.x1 /CLONE=IMAGE:2311092 /FEA=EST /CNT=10 /TID=Hs.148656.0 /TIER=ConsEnd /STK=6 /UG=Hs.148656 /UG_TITLE=ESTs, Weakly similar to T12453 hypothetical protein DKFZp564D2123.1 (H.sapiens)
MBLAC2	1.4824e-14	1.70812e-17	-2.11924	-1.08355	2.11924	down	-2.79436	-1.48252	2.79436	down	-1.95624	-0.968081	1.95624	down	-2.5115	-1.32855	2.5115	down	-2.00022	-1.00016	2.00022	down	-2.78373	-1.47702	2.78373	down	-2.83412	-1.5029	2.83412	down		153364	Hs.64004	gb:AI692906 /DB_XREF=gi:4970246 /DB_XREF=wd42g01.x1 /CLONE=IMAGE:2330832 /FEA=EST /CNT=14 /TID=Hs.64004.0 /TIER=Stack /STK=11 /UG=Hs.64004 /UG_TITLE=ESTs
SLC2A3	1.63425e-14	1.91297e-17	3.65356	1.8693	3.65356	up	3.39809	1.76472	3.39809	up	2.91809	1.54502	2.91809	up	3.97779	1.99197	3.97779	up	2.97258	1.57172	2.97258	up	4.52995	2.17949	4.52995	up	4.23182	2.08128	4.23182	up		6515	Hs.419240	gb:NM_006931.1 /DB_XREF=gi:5902089 /GEN=SLC2A3 /FEA=FLmRNA /CNT=182 /TID=Hs.7594.0 /TIER=FL+Stack /STK=47 /UG=Hs.7594 /LL=6515 /DEF=Homo sapiens solute carrier family 2 (facilitated glucose transporter), member 3 (SLC2A3), mRNA. /PROD=solute carrier family 2 (facilitated glucosetransporter), member 3 /FL=gb:NM_006931.1 gb:M20681.1
	1.66254e-14	1.9765e-17	2.90599	1.53903	2.90599	up	2.7647	1.46712	2.7647	up	2.12741	1.0891	2.12741	up	3.26664	1.70781	3.26664	up	2.62151	1.3904	2.62151	up	3.99154	1.99695	3.99154	up	3.26543	1.70727	3.26543	up				gb:AI286239 /DB_XREF=gi:3924472 /DB_XREF=qi02g05.x1 /CLONE=IMAGE:1855352 /FEA=EST /CNT=5 /TID=Hs.181156.0 /TIER=ConsEnd /STK=5 /UG=Hs.181156 /UG_TITLE=ESTs
AGAP4///AGAP5///AGAP9///CTGLF12P	1.6749e-14	2.02183e-17	-1.34908	-0.431974	1.34908	down	-1.26139	-0.335009	1.26139	down	-1.25062	-0.322638	1.25062	down	-1.45938	-0.54536	1.45938	down	-1.38115	-0.465871	1.38115	down	-1.56495	-0.646118	1.56495	down	-1.47112	-0.556916	1.47112	down		119016///414224///642517///729092	Hs.645346///Hs.651147///Hs.656384	gb:BE672818 /DB_XREF=gi:10033359 /DB_XREF=7d24c01.x1 /CLONE=IMAGE:3248160 /FEA=EST /CNT=20 /TID=Hs.297681.3 /TIER=Stack /STK=12 /UG=Hs.297681 /LL=5265 /UG_GENE=SERPINA1 /UG_TITLE=serine (or cysteine) proteinase inhibitor, clade A (alpha-1 antiproteinase, antitrypsin), member 1
CEACAM1	1.71559e-14	2.10232e-17	3.04977	1.6087	3.04977	up	2.29771	1.2002	2.29771	up	1.92161	0.942313	1.92161	up	3.2447	1.69809	3.2447	up	2.29032	1.19555	2.29032	up	4.49222	2.16743	4.49222	up	3.5064	1.80999	3.5064	up		634	Hs.512682	gb:M76742.1 /DB_XREF=gi:179480 /GEN=BGPa /FEA=FLmRNA /CNT=1 /TID=Hs.50964.4 /TIER=FL /STK=0 /UG=Hs.50964 /LL=634 /DEF=Homo sapiens alternatively spliced biliary glycoprotein (BGPa) mRNA, complete cds. /PROD=biliary glycoprotein /FL=gb:M76742.1
LRG1	1.72281e-14	2.14268e-17	3.94222	1.97901	3.94222	up	4.28034	2.09773	4.28034	up	3.13997	1.65075	3.13997	up	4.39823	2.13692	4.39823	up	3.43991	1.78237	3.43991	up	5.4027	2.43368	5.4027	up	5.43487	2.44225	5.43487	up		116844	Hs.655559	gb:AA622495 /DB_XREF=gi:2526371 /DB_XREF=nq59b04.s1 /CLONE=IMAGE:1148143 /FEA=EST /CNT=18 /TID=Hs.10844.0 /TIER=Stack /STK=9 /UG=Hs.10844 /UG_TITLE=ESTs, Highly similar to A2GL_HUMAN LEUCINE-RICH ALPHA-2-GLYCOPROTEIN (H.sapiens)
PFKFB3	1.75021e-14	2.22639e-17	6.17205	2.62575	6.17205	up	3.57166	1.83659	3.57166	up	2.87256	1.52234	2.87256	up	5.00871	2.32444	5.00871	up	3.04068	1.6044	3.04068	up	6.65486	2.73441	6.65486	up	4.52378	2.17753	4.52378	up		5209	Hs.195471	gb:NM_004566.1 /DB_XREF=gi:4758899 /GEN=PFKFB3 /FEA=FLmRNA /CNT=137 /TID=Hs.195471.0 /TIER=FL /STK=0 /UG=Hs.195471 /LL=5209 /DEF=Homo sapiens 6-phosphofructo-2-kinasefructose-2,6-biphosphatase 3 (PFKFB3), mRNA. /PROD=6-phosphofructo-2-kinasefructose-2,6-biphosphatase 3 /FL=gb:AF109735.1 gb:NM_004566.1 gb:D49817.1
RETN	1.75021e-14	2.24077e-17	9.01483	3.1723	9.01483	up	4.36489	2.12595	4.36489	up	3.67339	1.87711	3.67339	up	5.78681	2.53277	5.78681	up	4.70782	2.23506	4.70782	up	15.4962	3.95384	15.4962	up	8.83424	3.14311	8.83424	up		56729	Hs.283091	gb:NM_020415.2 /DB_XREF=gi:13435379 /GEN=FIZZ3 /FEA=FLmRNA /CNT=7 /TID=Hs.283091.0 /TIER=FL /STK=2 /UG=Hs.283091 /LL=56729 /DEF=Homo sapiens found in inflammatory zone 3 (FIZZ3), mRNA. /PROD=resistin /FL=gb:AF323081.1 gb:AF205952.1 gb:NM_020415.2
KIF1B	1.779e-14	2.31018e-17	3.66412	1.87347	3.66412	up	2.30687	1.20594	2.30687	up	2.29519	1.19862	2.29519	up	3.46816	1.79417	3.46816	up	2.47638	1.30823	2.47638	up	3.48876	1.80272	3.48876	up	3.40695	1.76848	3.40695	up		23095	Hs.97858	gb:BF939474 /DB_XREF=gi:12356794 /DB_XREF=nac76d12.x1 /CLONE=IMAGE:3440303 /FEA=FLmRNA /CNT=117 /TID=Hs.129908.0 /TIER=Stack /STK=28 /UG=Hs.129908 /LL=23095 /UG_GENE=KIAA0591 /UG_TITLE=KIAA0591 protein /FL=gb:BC001415.1
ACER3	2.20434e-14	2.90283e-17	3.68591	1.88202	3.68591	up	3.44724	1.78544	3.44724	up	2.63928	1.40014	2.63928	up	4.08533	2.03045	4.08533	up	2.51328	1.32957	2.51328	up	4.90716	2.29489	4.90716	up	4.52732	2.17866	4.52732	up		55331	Hs.23862	gb:R12678 /DB_XREF=gi:765754 /DB_XREF=yf40c04.s1 /CLONE=IMAGE:129318 /FEA=FLmRNA /CNT=80 /TID=Hs.23862.0 /TIER=Stack /STK=12 /UG=Hs.23862 /LL=55331 /UG_GENE=FLJ11238 /UG_TITLE=hypothetical protein FLJ11238 /FL=gb:NM_018367.1
IL10RB-AS1	2.27523e-14	3.0378e-17	3.50176	1.80808	3.50176	up	2.35094	1.23324	2.35094	up	2.19588	1.1348	2.19588	up	3.51335	1.81285	3.51335	up	2.58696	1.37126	2.58696	up	4.58516	2.19697	4.58516	up	4.07897	2.0282	4.07897	up		100288432	Hs.709795	gb:AI202642 /DB_XREF=gi:3755248 /DB_XREF=qs72d12.x1 /CLONE=IMAGE:1943639 /FEA=EST /CNT=15 /TID=Hs.237955.4 /TIER=Stack /STK=14 /UG=Hs.237955 /LL=55402 /UG_GENE=PRO2706 /UG_TITLE=hypothetical protein PRO2706
TLR5	2.53613e-14	3.43252e-17	4.2343	2.08212	4.2343	up	5.95711	2.57461	5.95711	up	3.784	1.91991	3.784	up	5.42413	2.43939	5.42413	up	3.56229	1.83281	3.56229	up	4.92861	2.30118	4.92861	up	4.95615	2.30922	4.95615	up		7100	Hs.604542	gb:AF051151.1 /DB_XREF=gi:3132525 /GEN=TIL3 /FEA=FLmRNA /CNT=15 /TID=Hs.114408.0 /TIER=FL /STK=6 /UG=Hs.114408 /LL=7100 /DEF=Homo sapiens Tollinterleukin-1 receptor-like protein 3 (TIL3) mRNA, complete cds. /PROD=Tollinterleukin-1 receptor-like protein 3 /FL=gb:AF051151.1
FCAR	2.66318e-14	3.6532e-17	8.1999	3.03561	8.1999	up	4.16483	2.05826	4.16483	up	4.57305	2.19316	4.57305	up	6.87286	2.78091	6.87286	up	3.63546	1.86214	3.63546	up	6.92455	2.79172	6.92455	up	5.17203	2.37073	5.17203	up		2204	Hs.659872	gb:NM_002000.1 /DB_XREF=gi:4503672 /GEN=FCAR /FEA=FLmRNA /CNT=6 /TID=Hs.193122.0 /TIER=FL /STK=0 /UG=Hs.193122 /LL=2204 /DEF=Homo sapiens Fc fragment of IgA, receptor for (FCAR), mRNA. /PROD=Fc fragment of IgA, receptor for /FL=gb:D87861.1 gb:D87855.1 gb:NM_002000.1
MAP3K7CL	3.14295e-14	4.3688e-17	-2.23439	-1.15988	2.23439	down	-3.47455	-1.79683	3.47455	down	-3.89221	-1.96059	3.89221	down	-2.48173	-1.31135	2.48173	down	-3.29506	-1.72031	3.29506	down	-4.01119	-2.00403	4.01119	down	-5.90727	-2.56249	5.90727	down		56911	Hs.222802	gb:NM_020152.1 /DB_XREF=gi:9910145 /GEN=C21orf7 /FEA=FLmRNA /CNT=2 /TID=Hs.41267.0 /TIER=FL /STK=0 /UG=Hs.41267 /LL=56911 /DEF=Homo sapiens c21orf7 form A-D (C21orf7), mRNA. /PROD=c21orf7 form A-D /FL=gb:NM_020152.1 gb:AF269161.1
GAS7	3.80308e-14	5.35597e-17	2.70033	1.43314	2.70033	up	2.08713	1.06152	2.08713	up	2.29607	1.19916	2.29607	up	3.40071	1.76584	3.40071	up	2.3548	1.23561	2.3548	up	3.14479	1.65296	3.14479	up	3.4856	1.80141	3.4856	up		8522	Hs.462214	gb:BC001152.1 /DB_XREF=gi:12654630 /FEA=FLmRNA /CNT=4 /TID=Hs.226133.2 /TIER=FL /STK=0 /UG=Hs.226133 /LL=8522 /UG_GENE=GAS7 /DEF=Homo sapiens, growth arrest-specific 7, clone MGC:1347, mRNA, complete cds. /PROD=growth arrest-specific 7 /FL=gb:BC001152.1
ADGRG3	3.99129e-14	5.69402e-17	4.33299	2.11536	4.33299	up	3.16584	1.66259	3.16584	up	2.95337	1.56236	2.95337	up	4.80375	2.26416	4.80375	up	2.8412	1.5065	2.8412	up	5.48657	2.45591	5.48657	up	5.45871	2.44856	5.45871	up		222487	Hs.383403	gb:NM_170776.1 /DB_XREF=gi:25092692 /GEN=GPR-97 /TID=Hs2.400682.1 /CNT=16 /FEA=FLmRNA /TIER=FL /STK=0 /LL=222487 /UG=Hs.400682 /DEF=Homo sapiens similar to G protein-coupled receptor 56; EGF-TM7-like (GPR-97), mRNA. /PROD=similar to G protein-coupled receptor 56;EGF-TM7-like /FL=gb:AY140959.1 gb:NM_170776.1
FGD4	5.47129e-14	7.90548e-17	3.29773	1.72147	3.29773	up	3.15927	1.65959	3.15927	up	2.73429	1.45117	2.73429	up	3.32493	1.73332	3.32493	up	2.17468	1.1208	2.17468	up	3.71374	1.89287	3.71374	up	3.07672	1.62139	3.07672	up		121512	Hs.117835	gb:AI949549 /DB_XREF=gi:5741859 /DB_XREF=wq11h04.x1 /CLONE=IMAGE:2470999 /FEA=EST /CNT=23 /TID=Hs.293097.0 /TIER=Stack /STK=14 /UG=Hs.293097 /UG_TITLE=ESTs, Weakly similar to A55380 faciogenital dysplasia-associated protein FGD1 (H.sapiens)
SLC2A3	6.8863e-14	1.0076e-16	5.11702	2.3553	5.11702	up	3.73497	1.9011	3.73497	up	3.66867	1.87526	3.66867	up	4.94659	2.30643	4.94659	up	3.23915	1.69562	3.23915	up	5.34266	2.41756	5.34266	up	4.90568	2.29445	4.90568	up		6515	Hs.419240	gb:BE550486 /DB_XREF=gi:9792178 /DB_XREF=7a27c01.x1 /CLONE=IMAGE:3219936 /FEA=FLmRNA /CNT=182 /TID=Hs.7594.0 /TIER=Stack /STK=8 /UG=Hs.7594 /LL=6515 /UG_GENE=SLC2A3 /UG_TITLE=solute carrier family 2 (facilitated glucose transporter), member 3 /FL=gb:NM_006931.1 gb:M20681.1
ENPP5	7.06776e-14	1.04708e-16	-1.24901	-0.320781	1.24901	down	-1.47268	-0.558445	1.47268	down	-1.35506	-0.438353	1.35506	down	-1.39794	-0.483298	1.39794	down	-1.37108	-0.455316	1.37108	down	-1.47037	-0.556176	1.47037	down	-1.49534	-0.580469	1.49534	down		59084	Hs.35198	gb:AA609053 /DB_XREF=gi:2457481 /DB_XREF=af10f08.s1 /CLONE=IMAGE:1031271 /FEA=FLmRNA /CNT=39 /TID=Hs.35198.0 /TIER=Stack /STK=18 /UG=Hs.35198 /LL=59084 /UG_GENE=ENPP5 /UG_TITLE=ectonucleotide pyrophosphatasephosphodiesterase 5 (putative function) /FL=gb:NM_021572.1
VNN1	7.79245e-14	1.17119e-16	7.28961	2.86584	7.28961	up	5.13207	2.35954	5.13207	up	6.02655	2.59133	6.02655	up	8.49244	3.08618	8.49244	up	8.45428	3.07968	8.45428	up	12.0754	3.59399	12.0754	up	9.71443	3.28013	9.71443	up		8876	Hs.12114	gb:NM_004666.1 /DB_XREF=gi:4759311 /GEN=VNN1 /FEA=FLmRNA /CNT=36 /TID=Hs.12114.0 /TIER=FL+Stack /STK=13 /UG=Hs.12114 /LL=8876 /DEF=Homo sapiens vanin 1 (VNN1), mRNA. /PROD=vanin 1 /FL=gb:U39664.1 gb:NM_004666.1
FLOT1	7.79245e-14	1.18294e-16	2.24382	1.16596	2.24382	up	2.03546	1.02535	2.03546	up	1.62731	0.702492	1.62731	up	2.60777	1.38281	2.60777	up	1.97948	0.985119	1.97948	up	2.92079	1.54636	2.92079	up	2.81309	1.49215	2.81309	up		10211	Hs.179986	gb:AF085357.1 /DB_XREF=gi:5114048 /FEA=FLmRNA /CNT=291 /TID=Hs.179986.0 /TIER=FL+Stack /STK=84 /UG=Hs.179986 /LL=10211 /UG_GENE=FLOT1 /DEF=Homo sapiens flotillin mRNA, complete cds. /PROD=flotillin /FL=gb:BC001146.1 gb:AF089750.2 gb:NM_005803.2 gb:AF085357.1
AGFG1	8.1351e-14	1.24984e-16	3.94699	1.98075	3.94699	up	2.47554	1.30774	2.47554	up	2.36018	1.23889	2.36018	up	3.26864	1.70869	3.26864	up	2.66801	1.41576	2.66801	up	4.07363	2.02631	4.07363	up	3.31006	1.72686	3.31006	up		3267	Hs.352962	gb:NM_004504.2 /DB_XREF=gi:7262381 /GEN=HRB /FEA=FLmRNA /CNT=153 /TID=Hs.171545.0 /TIER=FL+Stack /STK=35 /UG=Hs.171545 /LL=3267 /DEF=Homo sapiens HIV-1 Rev binding protein (HRB), mRNA. /PROD=HIV-1 Rev binding protein /FL=gb:NM_004504.2
HLA-DMB	8.65114e-14	1.34494e-16	-2.16588	-1.11496	2.16588	down	-2.18385	-1.12687	2.18385	down	-1.89992	-0.925942	1.89992	down	-1.91794	-0.939558	1.91794	down	-1.72615	-0.787554	1.72615	down	-3.06735	-1.61699	3.06735	down	-2.95284	-1.56211	2.95284	down		3109	Hs.351279	gb:NM_002118.1 /DB_XREF=gi:4504398 /GEN=HLA-DMB /FEA=FLmRNA /CNT=91 /TID=Hs.1162.0 /TIER=FL+Stack /STK=49 /UG=Hs.1162 /LL=3109 /DEF=Homo sapiens major histocompatibility complex, class II, DM beta (HLA-DMB), mRNA. /PROD=major histocompatibility complex, class II, DMbeta /FL=gb:NM_002118.1 gb:U15085.1
MATN1-AS1	8.84121e-14	1.39066e-16	-1.45981	-0.545783	1.45981	down	-1.33488	-0.416711	1.33488	down	-1.49692	-0.581997	1.49692	down	-1.54434	-0.626991	1.54434	down	-1.3323	-0.413918	1.3323	down	-1.69921	-0.764864	1.69921	down	-1.62859	-0.703621	1.62859	down		100129196	Hs.659751	gb:BE675718 /DB_XREF=gi:10036259 /DB_XREF=7f14h04.x1 /CLONE=IMAGE:3294679 /TID=Hs2.406897.1 /CNT=5 /FEA=mRNA /TIER=ConsEnd /STK=1 /UG=Hs.406897 /UG_TITLE=Homo sapiens cDNA FLJ33163 fis, clone UTERU2000541.
MKNK1	8.93339e-14	1.4215e-16	4.085	2.03034	4.085	up	3.91781	1.97005	3.91781	up	3.12043	1.64175	3.12043	up	4.12381	2.04398	4.12381	up	2.82354	1.49751	2.82354	up	4.08353	2.02982	4.08353	up	4.51454	2.17458	4.51454	up		8569		gb:AW796364 /DB_XREF=gi:7848234 /DB_XREF=PM1-UM0028-160200-001-d08 /FEA=EST /CNT=5 /TID=Hs.187665.0 /TIER=ConsEnd /STK=0 /UG=Hs.187665 /UG_TITLE=ESTs
ALPL	9.18647e-14	1.47857e-16	3.82874	1.93687	3.82874	up	4.67142	2.22386	4.67142	up	4.29926	2.10409	4.29926	up	6.01588	2.58878	6.01588	up	3.96305	1.98661	3.96305	up	5.99325	2.58334	5.99325	up	8.01232	3.00222	8.01232	up		249	Hs.75431	gb:X14174.1 /DB_XREF=gi:28737 /FEA=mRNA /CNT=2 /TID=Hs.250769.1 /TIER=ConsEnd /STK=0 /UG=Hs.250769 /LL=249 /UG_GENE=ALPL /UG_TITLE=alkaline phosphatase, liverbonekidney /DEF=Human mRNA for liver-type alkaline phosphatase (EC 3.1.3.1).
CKAP4	9.81114e-14	1.60124e-16	3.26154	1.70555	3.26154	up	3.46666	1.79354	3.46666	up	2.79765	1.48422	2.79765	up	4.1878	2.06619	4.1878	up	2.51566	1.33094	2.51566	up	4.93022	2.30165	4.93022	up	4.7892	2.25979	4.7892	up		10970	Hs.74368	gb:AW029619 /DB_XREF=gi:5888375 /DB_XREF=wx14e05.x1 /CLONE=IMAGE:2543648 /FEA=FLmRNA /CNT=354 /TID=Hs.74368.0 /TIER=Stack /STK=24 /UG=Hs.74368 /LL=10970 /UG_GENE=P63 /UG_TITLE=transmembrane protein (63kD), endoplasmic reticulumGolgi intermediate compartment /FL=gb:NM_006825.1
FCER1G	9.81114e-14	1.615e-16	2.19973	1.13733	2.19973	up	2.36513	1.24192	2.36513	up	1.8208	0.864571	1.8208	up	2.86952	1.52081	2.86952	up	1.97667	0.983071	1.97667	up	3.12787	1.64518	3.12787	up	2.77469	1.47233	2.77469	up		2207	Hs.433300	gb:NM_004106.1 /DB_XREF=gi:4758343 /GEN=FCER1G /FEA=FLmRNA /CNT=84 /TID=Hs.743.0 /TIER=FL+Stack /STK=36 /UG=Hs.743 /LL=2207 /DEF=Homo sapiens Fc fragment of IgE, high affinity I, receptor for; gamma polypeptide (FCER1G), mRNA. /PROD=Fc fragment of IgE, high affinity I, receptorfor, gamma polypeptide precursor /FL=gb:NM_004106.1 gb:M33195.1
SLC25A36	1.05028e-13	1.74806e-16	-1.78139	-0.833007	1.78139	down	-2.46686	-1.30267	2.46686	down	-1.76465	-0.819386	1.76465	down	-2.30202	-1.2029	2.30202	down	-1.84879	-0.886583	1.84879	down	-2.4098	-1.26892	2.4098	down	-2.83796	-1.50486	2.83796	down		55186	Hs.144130	gb:AL049246.1 /DB_XREF=gi:4499983 /FEA=FLmRNA /CNT=234 /TID=Hs.42484.0 /TIER=Stack /STK=60 /UG=Hs.42484 /LL=55186 /UG_GENE=FLJ10618 /UG_TITLE=hypothetical protein FLJ10618 /DEF=Homo sapiens mRNA; cDNA DKFZp564C053 (from clone DKFZp564C053). /FL=gb:NM_018155.1
CKAP4	1.06806e-13	1.80686e-16	3.48761	1.80224	3.48761	up	3.12732	1.64493	3.12732	up	2.54457	1.34742	2.54457	up	4.01194	2.0043	4.01194	up	3.05436	1.61087	3.05436	up	5.16913	2.36992	5.16913	up	4.66047	2.22048	4.66047	up		10970	Hs.74368	gb:NM_006825.1 /DB_XREF=gi:5803112 /GEN=P63 /FEA=FLmRNA /CNT=354 /TID=Hs.74368.0 /TIER=FL+Stack /STK=141 /UG=Hs.74368 /LL=10970 /DEF=Homo sapiens transmembrane protein (63kD), endoplasmic reticulumGolgi intermediate compartment (P63), mRNA. /PROD=transmembrane protein (63kD), endoplasmicreticulumGolgi intermediate compartment /FL=gb:NM_006825.1
ANO10	1.06806e-13	1.83627e-16	1.84699	0.885174	1.84699	up	1.71925	0.781782	1.71925	up	1.62573	0.701086	1.62573	up	2.08728	1.06162	2.08728	up	1.74012	0.799189	1.74012	up	2.32297	1.21597	2.32297	up	2.29029	1.19553	2.29029	up		55129	Hs.656657	gb:NM_018075.1 /DB_XREF=gi:8922383 /GEN=FLJ10375 /FEA=FLmRNA /CNT=60 /TID=Hs.319088.0 /TIER=FL+Stack /STK=31 /UG=Hs.319088 /LL=55129 /DEF=Homo sapiens hypothetical protein FLJ10375 (FLJ10375), mRNA. /PROD=hypothetical protein FLJ10375 /FL=gb:NM_018075.1
FCER1G	1.06806e-13	1.82866e-16	2.62553	1.39261	2.62553	up	2.71236	1.43955	2.71236	up	2.01009	1.00726	2.01009	up	3.47491	1.79697	3.47491	up	2.31898	1.21349	2.31898	up	3.74582	1.90528	3.74582	up	3.24745	1.69931	3.24745	up		2207	Hs.433300	gb:BC020763.1 /DB_XREF=gi:18088866 /TID=Hs2.433300.2 /CNT=3 /FEA=FLmRNA /TIER=FL /STK=1 /LL=2207 /UG_GENE=FCER1G /UG=Hs.433300 /DEF=Homo sapiens, Similar to Fc fragment of IgE, high affinity I, receptor for; gamma polypeptide, clone MGC:22620 IMAGE:4704425, mRNA, complete cds. /PROD=Similar to Fc fragment of IgE, high affinity I,receptor for; gamma polypeptide /FL=gb:BC020763.1
C3AR1	1.12475e-13	1.95429e-16	2.83562	1.50366	2.83562	up	3.76507	1.91268	3.76507	up	2.74917	1.459	2.74917	up	3.60287	1.84915	3.60287	up	3.51718	1.81442	3.51718	up	4.90872	2.29535	4.90872	up	4.73834	2.24438	4.73834	up		719	Hs.591148	gb:U62027.1 /DB_XREF=gi:1511643 /GEN=HNFAG09 /FEA=FLmRNA /CNT=43 /TID=Hs.155935.0 /TIER=FL+Stack /STK=19 /UG=Hs.155935 /LL=719 /DEF=Human anaphylatoxin C3a receptor (HNFAG09) mRNA, complete cds. /PROD=anaphylatoxin C3a receptor /FL=gb:U62027.1 gb:U28488.1 gb:NM_004054.1
DPY19L4	1.22173e-13	2.14515e-16	-1.85432	-0.890891	1.85432	down	-2.27271	-1.18441	2.27271	down	-1.73831	-0.797686	1.73831	down	-2.01724	-1.01239	2.01724	down	-1.58337	-0.662999	1.58337	down	-2.17497	-1.121	2.17497	down	-2.25134	-1.17078	2.25134	down		286148	Hs.567828	gb:AW517711 /DB_XREF=gi:7155793 /DB_XREF=xs86g04.x1 /CLONE=IMAGE:2776566 /FEA=EST /CNT=33 /TID=Hs.165539.0 /TIER=Stack /STK=15 /UG=Hs.165539 /UG_TITLE=ESTs
GAS7	1.23743e-13	2.19535e-16	3.05656	1.61191	3.05656	up	2.45539	1.29595	2.45539	up	2.38598	1.25458	2.38598	up	3.77637	1.917	3.77637	up	2.58732	1.37146	2.58732	up	3.7403	1.90316	3.7403	up	3.66847	1.87518	3.66847	up		8522	Hs.462214	gb:BC006454.1 /DB_XREF=gi:13623656 /FEA=FLmRNA /CNT=1 /TID=HsAffx.901088.521 /TIER=FL /STK=0 /DEF=Homo sapiens, growth arrest-specific 7, clone MGC:1348, mRNA, complete cds. /PROD=growth arrest-specific 7 /FL=gb:BC006454.1
CD1C	1.25414e-13	2.24792e-16	-1.56754	-0.648506	1.56754	down	-1.85806	-0.893794	1.85806	down	-1.58349	-0.66311	1.58349	down	-1.81327	-0.858594	1.81327	down	-1.73961	-0.798766	1.73961	down	-2.14356	-1.10001	2.14356	down	-2.08529	-1.06025	2.08529	down		911	Hs.132448	gb:NM_001765.1 /DB_XREF=gi:4502646 /GEN=CD1C /FEA=FLmRNA /CNT=24 /TID=Hs.1311.0 /TIER=FL+Stack /STK=8 /UG=Hs.1311 /LL=911 /DEF=Homo sapiens CD1C antigen, c polypeptide (CD1C), mRNA. /PROD=CD1C antigen, c polypeptide /FL=gb:NM_001765.1 gb:M28827.1
ACER3	1.3391e-13	2.42471e-16	3.26495	1.70706	3.26495	up	2.10219	1.07189	2.10219	up	2.14808	1.10305	2.14808	up	3.00048	1.5852	3.00048	up	1.93759	0.954261	1.93759	up	4.23397	2.08201	4.23397	up	3.09104	1.62809	3.09104	up		55331	Hs.23862	gb:N51263 /DB_XREF=gi:1192429 /DB_XREF=yz14b06.s1 /CLONE=IMAGE:282995 /FEA=FLmRNA /CNT=80 /TID=Hs.23862.0 /TIER=Stack /STK=8 /UG=Hs.23862 /LL=55331 /UG_GENE=FLJ11238 /UG_TITLE=hypothetical protein FLJ11238 /FL=gb:NM_018367.1
MS4A4A	1.41427e-13	2.58668e-16	11.0225	3.46238	11.0225	up	6.83821	2.77362	6.83821	up	5.63065	2.4933	5.63065	up	7.73487	2.95138	7.73487	up	7.0309	2.81371	7.0309	up	15.171	3.92324	15.171	up	11.4091	3.51212	11.4091	up		51338	Hs.325960	gb:NM_024021.1 /DB_XREF=gi:13430865 /GEN=MS4A4 /FEA=FLmRNA /CNT=42 /TID=Hs.325960.0 /TIER=FL /STK=0 /UG=Hs.325960 /LL=51338 /DEF=Homo sapiens membrane-spanning 4-domains, subfamily A, member 4 (MS4A4), mRNA. /PROD=membrane-spanning 4-domains, subfamily A, member4 /FL=gb:NM_016650.1 gb:NM_024021.1 gb:AF068288.1 gb:AB013102.1
SERPINB1	1.47881e-13	2.75883e-16	3.99145	1.99691	3.99145	up	3.04877	1.60823	3.04877	up	2.55107	1.3511	2.55107	up	3.76023	1.91082	3.76023	up	2.84119	1.50649	2.84119	up	4.95282	2.30825	4.95282	up	4.09491	2.03383	4.09491	up		1992	Hs.381167	gb:NM_030666.1 /DB_XREF=gi:13489086 /GEN=SERPINB1 /FEA=FLmRNA /CNT=170 /TID=Hs.183583.0 /TIER=FL+Stack /STK=55 /UG=Hs.183583 /LL=1992 /DEF=Homo sapiens serine (or cysteine) proteinase inhibitor, clade B (ovalbumin), member 1 (SERPINB1), mRNA. /PROD=serine (or cysteine) proteinase inhibitor, cladeB (ovalbumin), member 1 /FL=gb:NM_030666.1
PTPN4	1.47881e-13	2.7434e-16	-2.68602	-1.42547	2.68602	down	-2.77475	-1.47236	2.77475	down	-2.12776	-1.08933	2.12776	down	-3.32946	-1.73529	3.32946	down	-2.20617	-1.14154	2.20617	down	-3.32238	-1.73222	3.32238	down	-3.15731	-1.65869	3.15731	down		5775	Hs.469809	gb:AK025546.1 /DB_XREF=gi:10438095 /FEA=mRNA /CNT=13 /TID=Hs.71592.0 /TIER=ConsEnd /STK=0 /UG=Hs.71592 /UG_TITLE=Homo sapiens cDNA: FLJ21893 fis, clone HEP03412 /DEF=Homo sapiens cDNA: FLJ21893 fis, clone HEP03412.
MDFIC	1.55132e-13	2.92247e-16	-2.69556	-1.43058	2.69556	down	-3.0192	-1.59417	3.0192	down	-2.40116	-1.26373	2.40116	down	-3.15958	-1.65973	3.15958	down	-2.35479	-1.2356	2.35479	down	-3.7967	-1.92474	3.7967	down	-3.97129	-1.98961	3.97129	down		29969	Hs.741413	gb:AF054589.1 /DB_XREF=gi:3426297 /FEA=FLmRNA /CNT=1 /TID=HsAffx.900466.714 /TIER=FL /STK=0 /DEF=Homo sapiens HIC protein isoform p40 and HIC protein isoform p32 mRNAs, complete cds. /PROD=HIC protein isoform p40 /FL=gb:AF054589.1
IL1R2	1.77968e-13	3.40623e-16	7.2257	2.85314	7.2257	up	6.55973	2.71364	6.55973	up	6.42472	2.68363	6.42472	up	12.7478	3.67218	12.7478	up	7.64416	2.93436	7.64416	up	18.7041	4.22528	18.7041	up	14.2248	3.83034	14.2248	up		7850	Hs.25333	gb:U64094.1 /DB_XREF=gi:1488065 /FEA=FLmRNA /CNT=1 /TID=Hs.25333.1 /TIER=FL /STK=0 /UG=Hs.25333 /LL=7850 /UG_GENE=IL1R2 /DEF=Human soluble type II interleukin-1 receptor mRNA, complete cds. /PROD=soluble type II interleukin-1 receptor /FL=gb:U64094.1
IL10RB-AS1	1.77968e-13	3.41777e-16	2.07123	1.05049	2.07123	up	1.4648	0.550705	1.4648	up	1.48552	0.570966	1.48552	up	2.18911	1.13034	2.18911	up	1.74754	0.805329	1.74754	up	2.6935	1.42948	2.6935	up	2.43213	1.28222	2.43213	up		100288432	Hs.709795	gb:AI202642 /DB_XREF=gi:3755248 /DB_XREF=qs72d12.x1 /CLONE=IMAGE:1943639 /FEA=EST /CNT=15 /TID=Hs.237955.4 /TIER=Stack /STK=14 /UG=Hs.237955 /LL=55402 /UG_GENE=PRO2706 /UG_TITLE=hypothetical protein PRO2706
WDFY3	1.78567e-13	3.46193e-16	3.54545	1.82597	3.54545	up	2.7739	1.47192	2.7739	up	2.7179	1.44249	2.7179	up	3.24875	1.69988	3.24875	up	2.46246	1.3001	2.46246	up	3.57987	1.83991	3.57987	up	3.25887	1.70437	3.25887	up		23001	Hs.480116	gb:BE348236 /DB_XREF=gi:9260089 /DB_XREF=hw21a12.x1 /CLONE=IMAGE:3183550 /FEA=mRNA /CNT=134 /TID=Hs.198135.0 /TIER=Stack /STK=17 /UG=Hs.198135 /LL=23001 /UG_GENE=KIAA0993 /UG_TITLE=KIAA0993 protein
SLC2A3	2.01151e-13	3.93656e-16	3.49027	1.80334	3.49027	up	2.57303	1.36347	2.57303	up	2.68642	1.42568	2.68642	up	3.62131	1.85651	3.62131	up	2.50146	1.32277	2.50146	up	4.03662	2.01315	4.03662	up	3.79198	1.92295	3.79198	up		6515	Hs.419240	gb:AI631159 /DB_XREF=gi:4682489 /DB_XREF=ts93d05.x1 /CLONE=IMAGE:2238825 /FEA=FLmRNA /CNT=182 /TID=Hs.7594.0 /TIER=Stack /STK=19 /UG=Hs.7594 /LL=6515 /UG_GENE=SLC2A3 /UG_TITLE=solute carrier family 2 (facilitated glucose transporter), member 3 /FL=gb:NM_006931.1 gb:M20681.1
KLF8	2.47759e-13	4.89401e-16	-1.46203	-0.547969	1.46203	down	-1.56796	-0.64889	1.56796	down	-1.42479	-0.510746	1.42479	down	-1.58272	-0.662408	1.58272	down	-1.43631	-0.522368	1.43631	down	-1.68022	-0.748653	1.68022	down	-1.60105	-0.679017	1.60105	down		11279	Hs.646614	gb:AI821447 /DB_XREF=gi:5440526 /DB_XREF=yp24d10.x5 /CLONE=IMAGE:188371 /FEA=EST /CNT=11 /TID=Hs.141120.0 /TIER=Stack /STK=8 /UG=Hs.141120 /UG_TITLE=ESTs
MGC40069	3.28133e-13	6.54166e-16	-2.57799	-1.36624	2.57799	down	-2.33148	-1.22125	2.33148	down	-2.3705	-1.24519	2.3705	down	-2.86677	-1.51943	2.86677	down	-2.22187	-1.15177	2.22187	down	-3.00906	-1.58931	3.00906	down	-2.93527	-1.5535	2.93527	down		348035	Hs.369380	gb:AI684979 /DB_XREF=gi:4896273 /DB_XREF=wc27c12.x1 /CLONE=IMAGE:2316406 /FEA=EST /CNT=5 /TID=Hs.157303.0 /TIER=ConsEnd /STK=1 /UG=Hs.157303 /UG_TITLE=ESTs
RAB13	3.49105e-13	7.02361e-16	2.05109	1.03639	2.05109	up	2.53548	1.34226	2.53548	up	2.74534	1.45699	2.74534	up	2.82108	1.49625	2.82108	up	3.00698	1.58831	3.00698	up	3.39704	1.76428	3.39704	up	2.92878	1.5503	2.92878	up		5872	Hs.151536	gb:NM_002870.1 /DB_XREF=gi:4506362 /GEN=RAB13 /FEA=FLmRNA /CNT=129 /TID=Hs.151536.0 /TIER=FL /STK=0 /UG=Hs.151536 /LL=5872 /DEF=Homo sapiens RAB13, member RAS oncogene family (RAB13), mRNA. /PROD=RAB13, member RAS oncogene family /FL=gb:BC000799.1 gb:NM_002870.1
DDAH2	3.55143e-13	7.21004e-16	1.90351	0.928662	1.90351	up	1.58358	0.663193	1.58358	up	1.32592	0.406994	1.32592	up	1.90712	0.931398	1.90712	up	1.5254	0.609187	1.5254	up	2.44198	1.28805	2.44198	up	2.51019	1.3278	2.51019	up		23564	Hs.247362	gb:AJ012008 /DB_XREF=gi:5304874 /FEA=DNA_4 /CNT=3 /TID=Hs.247362.1 /TIER=ConsEnd /STK=0 /UG=Hs.247362 /LL=23564 /UG_GENE=DDAH2 /UG_TITLE=dimethylarginine dimethylaminohydrolase 2 /DEF=Homo sapiens genes encoding RNCC protein, DDAH protein, Ly6-C protein, Ly6-D protein and immunoglobulin receptor
ZNF420	3.64626e-13	7.46924e-16	-1.77551	-0.828233	1.77551	down	-1.9175	-0.939227	1.9175	down	-1.78049	-0.832271	1.78049	down	-2.21592	-1.14791	2.21592	down	-1.74843	-0.806062	1.74843	down	-2.20436	-1.14036	2.20436	down	-2.44603	-1.29044	2.44603	down		147923		gb:AI061288 /DB_XREF=gi:3336656 /DB_XREF=an25h09.x1 /CLONE=IMAGE:1699745 /FEA=EST /CNT=5 /TID=Hs.133437.0 /TIER=ConsEnd /STK=2 /UG=Hs.133437 /UG_TITLE=ESTs
LTB4R	3.67652e-13	7.59847e-16	2.03324	1.02378	2.03324	up	1.92925	0.948037	1.92925	up	1.77026	0.823958	1.77026	up	2.52055	1.33374	2.52055	up	1.9382	0.954719	1.9382	up	2.66644	1.41491	2.66644	up	2.97895	1.57481	2.97895	up		1241	Hs.567248	gb:U33448 /DB_XREF=gi:1613770 /FEA=DNA /CNT=1 /TID=Hs.28408.2 /TIER=ConsEnd /STK=0 /UG=Hs.28408 /LL=1241 /UG_GENE=LTB4R /UG_TITLE=leukotriene b4 receptor (chemokine receptor-like 1) /DEF=Human putative G-protein-coupled receptor (GPR16) gene, complete cds
BCL6	3.79274e-13	7.90805e-16	4.17811	2.06285	4.17811	up	3.63464	1.86181	3.63464	up	3.81836	1.93295	3.81836	up	4.56932	2.19198	4.56932	up	3.5008	1.80768	3.5008	up	4.61549	2.20648	4.61549	up	4.96088	2.3106	4.96088	up		604		gb:AW264036 /DB_XREF=gi:6640852 /DB_XREF=xq82g12.x1 /CLONE=IMAGE:2757190 /FEA=EST /CNT=17 /TID=Hs.63920.0 /TIER=Stack /STK=14 /UG=Hs.63920 /UG_TITLE=ESTs
PLEKHA1	4.10574e-13	8.63577e-16	-2.6124	-1.38537	2.6124	down	-2.50109	-1.32256	2.50109	down	-2.53493	-1.34195	2.53493	down	-3.31115	-1.72733	3.31115	down	-2.51849	-1.33256	2.51849	down	-3.88763	-1.95889	3.88763	down	-4.04924	-2.01765	4.04924	down		59338	Hs.643512	gb:AI346026 /DB_XREF=gi:4083232 /DB_XREF=qp48b01.x1 /CLONE=IMAGE:1926217 /FEA=mRNA /CNT=61 /TID=Hs.287830.0 /TIER=Stack /STK=23 /UG=Hs.287830 /UG_TITLE=Homo sapiens mRNA; cDNA DKFZp434E1515 (from clone DKFZp434E1515)
ADGRG3	4.35725e-13	9.24446e-16	2.97922	1.57494	2.97922	up	2.28762	1.19385	2.28762	up	2.04479	1.03195	2.04479	up	3.05513	1.61123	3.05513	up	2.17673	1.12216	2.17673	up	3.54399	1.82537	3.54399	up	3.48387	1.80069	3.48387	up		222487	Hs.383403	gb:NM_014076.1 /DB_XREF=gi:7662571 /GEN=PRO0611 /FEA=FLmRNA /CNT=8 /TID=Hs.163833.0 /TIER=FL /STK=0 /UG=Hs.163833 /LL=28997 /DEF=Homo sapiens PRO0611 protein (PRO0611), mRNA. /PROD=PRO0611 protein /FL=gb:AF111851.1 gb:NM_014076.1
SORT1	4.87964e-13	1.0442e-15	2.99788	1.58394	2.99788	up	2.11333	1.07952	2.11333	up	1.97531	0.982076	1.97531	up	3.33209	1.73643	3.33209	up	2.30956	1.20762	2.30956	up	3.40202	1.76639	3.40202	up	3.20042	1.67826	3.20042	up		6272	Hs.485195	gb:BE622952 /DB_XREF=gi:9893892 /DB_XREF=601440817T1 /CLONE=IMAGE:3915557 /FEA=mRNA /CNT=163 /TID=Hs.180372.0 /TIER=Stack /STK=20 /UG=Hs.180372 /UG_TITLE=Homo sapiens cDNA FLJ20750 fis, clone HEP05174
TC2N	4.97174e-13	1.073e-15	-3.02483	-1.59685	3.02483	down	-2.80932	-1.49022	2.80932	down	-2.79641	-1.48357	2.79641	down	-4.01162	-2.00418	4.01162	down	-2.8168	-1.49406	2.8168	down	-4.01982	-2.00713	4.01982	down	-4.12487	-2.04435	4.12487	down		123036	Hs.510262	gb:AI741469 /DB_XREF=gi:5109757 /DB_XREF=wg11b01.x1 /CLONE=IMAGE:2364745 /FEA=EST /CNT=83 /TID=Hs.57787.0 /TIER=ConsEnd /STK=0 /UG=Hs.57787 /UG_TITLE=ESTs
KLF12	4.98824e-13	1.08569e-15	-3.35045	-1.74435	3.35045	down	-3.9086	-1.96665	3.9086	down	-3.04361	-1.60578	3.04361	down	-4.35435	-2.12246	4.35435	down	-3.21178	-1.68337	3.21178	down	-5.20845	-2.38085	5.20845	down	-5.68141	-2.50625	5.68141	down		11278	Hs.373857	gb:AA020010 /DB_XREF=gi:1483683 /DB_XREF=ze62f10.s1 /CLONE=IMAGE:363595 /FEA=EST /CNT=35 /TID=Hs.294018.0 /TIER=Stack /STK=13 /UG=Hs.294018 /UG_TITLE=ESTs
MAN1A2	5.20756e-13	1.14295e-15	-1.87203	-0.904603	1.87203	down	-1.95976	-0.970673	1.95976	down	-1.80093	-0.848745	1.80093	down	-2.26626	-1.18031	2.26626	down	-1.70032	-0.765809	1.70032	down	-2.41276	-1.27068	2.41276	down	-2.41307	-1.27087	2.41307	down		10905	Hs.602811	gb:AL157902 /DB_XREF=gi:9581579 /FEA=FLmRNA /CNT=224 /TID=Hs.239114.0 /TIER=Stack /STK=55 /UG=Hs.239114 /LL=10905 /UG_GENE=MAN1A2 /UG_TITLE=mannosidase, alpha, class 1A, member 2 /DEF=Human DNA sequence from clone RP4-675C20 on chromosome 1p13.2. Contains the 3 end of the MAN1A2 gene for mannosidase alpha 1A2, a pseudogene similar to predicted fly, worm and yeast genes, ESTs, STSs and GSSs /FL=gb…
ZDHHC21	6.0261e-13	1.33362e-15	-1.49765	-0.582698	1.49765	down	-1.91965	-0.940843	1.91965	down	-1.56536	-0.646495	1.56536	down	-1.70609	-0.770697	1.70609	down	-1.44841	-0.534472	1.44841	down	-1.84018	-0.879849	1.84018	down	-1.98125	-0.986411	1.98125	down		340481	Hs.714266	gb:AI658548 /DB_XREF=gi:4762118 /DB_XREF=tu17h09.x1 /CLONE=IMAGE:2251361 /FEA=EST /CNT=17 /TID=Hs.21388.0 /TIER=Stack /STK=17 /UG=Hs.21388 /UG_TITLE=ESTs
ATP11B	6.31429e-13	1.40895e-15	2.30708	1.20607	2.30708	up	1.59896	0.677132	1.59896	up	1.45841	0.544395	1.45841	up	1.82995	0.871801	1.82995	up	1.56943	0.650243	1.56943	up	2.42686	1.27909	2.42686	up	1.96228	0.972528	1.96228	up		23200	Hs.478429	gb:BC033880.1 /DB_XREF=gi:21707507 /TID=Hs2.75478.1 /CNT=10 /FEA=FLmRNA /TIER=FL /STK=1 /LL=23200 /UG_GENE=ATP11B /UG=Hs.75478 /DEF=Homo sapiens, Similar to RIKEN cDNA 1110019I14 gene, clone MGC:46260 IMAGE:5548541, mRNA, complete cds. /PROD=Similar to RIKEN cDNA 1110019I14 gene /FL=gb:BC033880.1
ZBTB25	6.51273e-13	1.46514e-15	-1.51305	-0.597463	1.51305	down	-1.59562	-0.674117	1.59562	down	-1.47232	-0.558092	1.47232	down	-1.6889	-0.756083	1.6889	down	-1.39973	-0.485147	1.39973	down	-1.78482	-0.835777	1.78482	down	-1.68273	-0.7508	1.68273	down		7597	Hs.654571	gb:NM_006977.1 /DB_XREF=gi:5902163 /GEN=ZNF46 /FEA=FLmRNA /CNT=7 /TID=Hs.164347.0 /TIER=FL /STK=2 /UG=Hs.164347 /LL=7597 /DEF=Homo sapiens zinc finger protein 46 (KUP) (ZNF46), mRNA. /PROD=zinc finger protein 46 (KUP) /FL=gb:NM_006977.1
IKZF2	6.80429e-13	1.54318e-15	-4.85801	-2.28036	4.85801	down	-4.31041	-2.10783	4.31041	down	-3.90713	-1.96611	3.90713	down	-5.82999	-2.54349	5.82999	down	-3.7873	-1.92117	3.7873	down	-5.75226	-2.52413	5.75226	down	-6.15011	-2.62061	6.15011	down		22807	Hs.604950	gb:AI458439 /DB_XREF=gi:4311018 /DB_XREF=tj82c11.x1 /CLONE=IMAGE:2148020 /FEA=mRNA /CNT=17 /TID=Hs.159115.0 /TIER=ConsEnd /STK=0 /UG=Hs.159115 /UG_TITLE=Homo sapiens mRNA; cDNA DKFZp586O0724 (from clone DKFZp586O0724)
SYNJ2BP	7.1518e-13	1.63507e-15	-1.7857	-0.836494	1.7857	down	-1.93741	-0.954128	1.93741	down	-1.60065	-0.678656	1.60065	down	-2.24296	-1.1654	2.24296	down	-1.7066	-0.771129	1.7066	down	-2.62791	-1.39391	2.62791	down	-2.8152	-1.49324	2.8152	down		55333	Hs.443661	gb:AI709389 /DB_XREF=gi:4999165 /DB_XREF=as37b09.x1 /CLONE=IMAGE:2319353 /FEA=EST /CNT=42 /TID=Hs.323949.1 /TIER=Stack /STK=29 /UG=Hs.323949 /LL=3732 /UG_GENE=KAI1 /UG_TITLE=kangai 1 (suppression of tumorigenicity 6, prostate; CD82 antigen (R2 leukocyte antigen, antigen detected by monoclonal and antibody IA4))
GPR183	7.24504e-13	1.66964e-15	-3.02963	-1.59914	3.02963	down	-2.75035	-1.45962	2.75035	down	-2.89407	-1.5331	2.89407	down	-3.91047	-1.96734	3.91047	down	-2.58592	-1.37068	2.58592	down	-4.04523	-2.01622	4.04523	down	-4.4216	-2.14457	4.4216	down		1880	Hs.784	gb:NM_004951.1 /DB_XREF=gi:4826705 /GEN=EBI2 /FEA=FLmRNA /CNT=43 /TID=Hs.784.0 /TIER=FL+Stack /STK=10 /UG=Hs.784 /LL=1880 /DEF=Homo sapiens Epstein-Barr virus induced gene 2 (lymphocyte-specific G protein-coupled receptor) (EBI2), mRNA. /PROD=Epstein-Barr virus induced gene 2(lymphocyte-specific G protein-coupled receptor) /FL=gb:L08177.1 gb:NM_004951.1
ZNF550	7.39288e-13	1.73075e-15	-1.47281	-0.558567	1.47281	down	-1.87962	-0.910443	1.87962	down	-1.66913	-0.739099	1.66913	down	-1.85847	-0.894117	1.85847	down	-1.70699	-0.771454	1.70699	down	-2.22313	-1.15259	2.22313	down	-2.34959	-1.23241	2.34959	down		162972	Hs.180257	gb:AI805301 /DB_XREF=gi:5391867 /DB_XREF=te32f06.x1 /CLONE=IMAGE:2087651 /FEA=EST /CNT=23 /TID=Hs.180257.0 /TIER=Stack /STK=10 /UG=Hs.180257 /UG_TITLE=ESTs
METTL9	7.39288e-13	1.72636e-15	3.08558	1.62554	3.08558	up	2.88802	1.53008	2.88802	up	2.45625	1.29645	2.45625	up	3.47819	1.79834	3.47819	up	2.51152	1.32856	2.51152	up	3.63387	1.86151	3.63387	up	3.54147	1.82435	3.54147	up		51108	Hs.709488	gb:AI536637 /DB_XREF=gi:4450772 /DB_XREF=ti80h03.x1 /CLONE=IMAGE:2138357 /FEA=EST /CNT=17 /TID=Hs.14411.0 /TIER=Stack /STK=8 /UG=Hs.14411 /UG_TITLE=ESTs
	8.64562e-13	2.03984e-15	-2.60438	-1.38094	2.60438	down	-2.79587	-1.4833	2.79587	down	-2.42148	-1.27589	2.42148	down	-3.1369	-1.64934	3.1369	down	-2.58662	-1.37107	2.58662	down	-3.95997	-1.98549	3.95997	down	-4.31759	-2.11022	4.31759	down				gb:BF114870 /DB_XREF=gi:10984346 /DB_XREF=7i87g09.x1 /CLONE=IMAGE:3341728 /FEA=EST /CNT=23 /TID=Hs.58606.1 /TIER=Stack /STK=11 /UG=Hs.58606 /LL=8926 /UG_GENE=SNURF /UG_TITLE=SNRPN upstream reading frame
KLHL3	9.40196e-13	2.23549e-15	-1.89549	-0.922571	1.89549	down	-1.76291	-0.817962	1.76291	down	-1.67266	-0.742147	1.67266	down	-2.01155	-1.00831	2.01155	down	-1.73678	-0.796412	1.73678	down	-2.31655	-1.21198	2.31655	down	-2.05274	-1.03755	2.05274	down		26249	Hs.655084	gb:NM_017415.1 /DB_XREF=gi:8393671 /GEN=KLHL3 /FEA=FLmRNA /CNT=3 /TID=Hs.7388.0 /TIER=FL /STK=0 /UG=Hs.7388 /LL=26249 /DEF=Homo sapiens kelch (Drosophila)-like 3 (KLHL3), mRNA. /PROD=kelch (Drosophila)-like 3 /FL=gb:NM_017415.1 gb:AF208068.1
TMUB2	1.03052e-12	2.46909e-15	1.55636	0.638174	1.55636	up	1.35344	0.436626	1.35344	up	1.44651	0.532577	1.44651	up	1.58827	0.667454	1.58827	up	1.54771	0.63014	1.54771	up	1.747	0.804876	1.747	up	2.0038	1.00274	2.0038	up		79089	Hs.181391	gb:NM_024107.1 /DB_XREF=gi:13129117 /GEN=MGC3123 /FEA=FLmRNA /CNT=76 /TID=Hs.288600.0 /TIER=FL /STK=0 /UG=Hs.288600 /LL=79089 /DEF=Homo sapiens hypothetical protein MGC3123 (MGC3123), mRNA. /PROD=hypothetical protein MGC3123 /FL=gb:BC001792.1 gb:NM_024107.1
G0S2	1.0662e-12	2.57409e-15	2.2494	1.16954	2.2494	up	1.49492	0.580065	1.49492	up	1.12117	0.165004	1.12117	up	1.97975	0.985322	1.97975	up	1.51261	0.597042	1.51261	up	3.42457	1.77592	3.42457	up	2.01984	1.01424	2.01984	up		50486	Hs.432132	gb:NM_015714.1 /DB_XREF=gi:7657103 /GEN=G0S2 /FEA=FLmRNA /CNT=62 /TID=Hs.95910.0 /TIER=FL+Stack /STK=9 /UG=Hs.95910 /LL=50486 /DEF=Homo sapiens putative lymphocyte G0G1 switch gene (G0S2), mRNA. /PROD=putative lymphocyte G0G1 switch gene /FL=gb:NM_015714.1
MAPK14	1.09696e-12	2.66843e-15	3.74026	1.90314	3.74026	up	2.83671	1.50422	2.83671	up	2.83149	1.50156	2.83149	up	4.36734	2.12676	4.36734	up	2.86514	1.5186	2.86514	up	4.15421	2.05458	4.15421	up	4.08118	2.02899	4.08118	up		1432	Hs.485233	gb:L35253.1 /DB_XREF=gi:529039 /FEA=FLmRNA /CNT=1 /TID=Hs.79107.2 /TIER=FL /STK=0 /UG=Hs.79107 /LL=1432 /UG_GENE=MAPK14 /DEF=Human p38 mitogen activated protein (MAP) kinase mRNA, complete cds. /PROD=MAP kinase /FL=gb:L35253.1
MTF1	1.13675e-12	2.78601e-15	1.93865	0.955055	1.93865	up	2.09151	1.06454	2.09151	up	1.80536	0.852284	1.80536	up	2.47286	1.30618	2.47286	up	2.01818	1.01306	2.01818	up	2.49146	1.31699	2.49146	up	2.75959	1.46446	2.75959	up		4520	Hs.471991	gb:AW182367 /DB_XREF=gi:6450827 /DB_XREF=xj41g06.x1 /CLONE=IMAGE:2659834 /FEA=FLmRNA /CNT=43 /TID=Hs.211581.0 /TIER=Stack /STK=9 /UG=Hs.211581 /LL=4520 /UG_GENE=MTF1 /UG_TITLE=metal-regulatory transcription factor 1 /FL=gb:NM_005955.1
CLEC4D	1.25264e-12	3.09293e-15	7.61826	2.92946	7.61826	up	4.47941	2.16331	4.47941	up	3.73289	1.90029	3.73289	up	5.57376	2.47865	5.57376	up	3.26591	1.70748	3.26591	up	7.82127	2.9674	7.82127	up	5.30107	2.40628	5.30107	up		338339	Hs.351811	gb:BC032313.1 /DB_XREF=gi:21595254 /TID=Hs2.351811.1 /CNT=7 /FEA=FLmRNA /TIER=FL /STK=1 /LL=121481 /UG_GENE=CLEC-6 /UG=Hs.351811 /DEF=Homo sapiens, C-type lectin-like receptor, clone MGC:40078 IMAGE:5218660, mRNA, complete cds. /PROD=C-type lectin-like receptor /FL=gb:BC032313.1 gb:AF411850.1 gb:NM_080387.2
TRDV3	1.29549e-12	3.24613e-15	-5.61767	-2.48997	5.61767	down	-6.19883	-2.632	6.19883	down	-5.17438	-2.37139	5.17438	down	-8.26086	-3.04629	8.26086	down	-5.05766	-2.33847	5.05766	down	-10.1306	-3.34064	10.1306	down	-10.5249	-3.39573	10.5249	down		28516	Hs.74647	gb:X72501.1 /DB_XREF=gi:298104 /FEA=mRNA /CNT=3 /TID=Hs.307187.0 /TIER=ConsEnd /STK=0 /UG=Hs.307187 /DEF=H.sapiens mRNA for soluble delta TCR. /PROD=gamma-delta T-cell receptor
CARD6	1.29549e-12	3.23559e-15	2.92191	1.54691	2.92191	up	2.84325	1.50754	2.84325	up	2.09883	1.06959	2.09883	up	3.11644	1.6399	3.11644	up	2.30879	1.20714	2.30879	up	3.26156	1.70556	3.26156	up	3.12963	1.64599	3.12963	up		84674	Hs.200242	gb:AF356193.1 /DB_XREF=gi:13605448 /FEA=FLmRNA /CNT=1 /TID=HsAffx.900648.404 /TIER=FL /STK=0 /DEF=Homo sapiens caspase recruitment domain protein 6 mRNA, complete cds. /PROD=caspase recruitment domain protein 6 /FL=gb:AF356193.1
IL1R2	1.32268e-12	3.33845e-15	5.08917	2.34743	5.08917	up	4.32566	2.11292	4.32566	up	4.81576	2.26776	4.81576	up	8.1105	3.01979	8.1105	up	5.26515	2.39648	5.26515	up	11.5517	3.53004	11.5517	up	8.81541	3.14003	8.81541	up		7850	Hs.25333	gb:NM_004633.1 /DB_XREF=gi:4758597 /GEN=IL1R2 /FEA=FLmRNA /CNT=35 /TID=Hs.25333.0 /TIER=FL+Stack /STK=13 /UG=Hs.25333 /LL=7850 /DEF=Homo sapiens interleukin 1 receptor, type II (IL1R2), mRNA. /PROD=interleukin 1 receptor, type II /FL=gb:U74649.1 gb:NM_004633.1
HGF	1.54963e-12	3.93961e-15	5.24194	2.3901	5.24194	up	2.05328	1.03793	2.05328	up	1.45343	0.539464	1.45343	up	3.46859	1.79435	3.46859	up	1.93389	0.951503	1.93389	up	5.46722	2.45081	5.46722	up	3.01892	1.59403	3.01892	up		3082	Hs.396530	gb:M77227.1 /DB_XREF=gi:184029 /FEA=FLmRNA /CNT=4 /TID=Hs.809.1 /TIER=FL /STK=1 /UG=Hs.809 /LL=3082 /UG_GENE=HGF /DEF=H.sapiens competitive HGF antagonist mRNA, complete cds. /PROD=competitive HGF antagonist /FL=gb:L02931.1 gb:M77227.1
FAM135A	1.585e-12	4.05853e-15	-1.53792	-0.620981	1.53792	down	-1.69391	-0.760354	1.69391	down	-1.58577	-0.665184	1.58577	down	-1.83429	-0.875218	1.83429	down	-1.54267	-0.625434	1.54267	down	-1.98762	-0.991043	1.98762	down	-2.12847	-1.08981	2.12847	down		57579	Hs.211700	gb:AL136820.1 /DB_XREF=gi:12053150 /GEN=DKFZp434G0326 /FEA=FLmRNA /CNT=41 /TID=Hs.107287.0 /TIER=FL+Stack /STK=11 /UG=Hs.107287 /LL=57579 /DEF=Homo sapiens mRNA; cDNA DKFZp434G0326 (from clone DKFZp434G0326); complete cds. /PROD=hypothetical protein /FL=gb:AL136820.1
SLC26A8	1.61956e-12	4.17664e-15	3.33787	1.73893	3.33787	up	3.27342	1.7108	3.27342	up	2.39734	1.26144	2.39734	up	3.27016	1.70936	3.27016	up	2.62867	1.39434	2.62867	up	3.71544	1.89353	3.71544	up	3.71219	1.89227	3.71219	up		116369	Hs.435836	gb:BE551631 /DB_XREF=gi:9793243 /DB_XREF=hx96a08.x1 /CLONE=IMAGE:3195638 /FEA=EST /CNT=8 /TID=Hs.20969.0 /TIER=ConsEnd /STK=7 /UG=Hs.20969 /UG_TITLE=ESTs
LIN7A	1.62719e-12	4.25584e-15	2.99872	1.58435	2.99872	up	2.23072	1.15751	2.23072	up	2.01672	1.01201	2.01672	up	2.88726	1.5297	2.88726	up	2.07536	1.05336	2.07536	up	3.43061	1.77847	3.43061	up	3.11081	1.63729	3.11081	up		8825	Hs.144333	gb:NM_004664.1 /DB_XREF=gi:4759305 /GEN=VELI1 /FEA=FLmRNA /CNT=19 /TID=Hs.178215.0 /TIER=FL /STK=3 /UG=Hs.178215 /LL=8825 /DEF=Homo sapiens Vertebrate LIN7 homolog 1, Tax interaction protein 33 (VELI1), mRNA. /PROD=Vertebrate LIN7 homolog 1, Tax interactionprotein 33 /FL=gb:AF087693.1 gb:NM_004664.1 gb:AF173081.1
KLRC3	1.62719e-12	4.23904e-15	-2.90949	-1.54077	2.90949	down	-3.7153	-1.89348	3.7153	down	-3.28555	-1.71613	3.28555	down	-4.59469	-2.19997	4.59469	down	-3.14768	-1.65429	3.14768	down	-4.16262	-2.05749	4.16262	down	-4.23063	-2.08087	4.23063	down		3823	Hs.654362	gb:NM_002261.1 /DB_XREF=gi:4504884 /GEN=KLRC3 /FEA=FLmRNA /CNT=6 /TID=Hs.258850.1 /TIER=FL /STK=2 /UG=Hs.258850 /LL=3823 /DEF=Homo sapiens killer cell lectin-like receptor subfamily C, member 3 (KLRC3), transcript variant NKG2-E, mRNA. /PROD=killer cell lectin-like receptor subfamily C,member 3 isoform NKG2-E /FL=gb:NM_002261.1 gb:L14542.1
ACSS2	1.67322e-12	4.40684e-15	1.41039	0.496099	1.41039	up	1.47692	0.562587	1.47692	up	1.39314	0.478344	1.39314	up	1.53268	0.616053	1.53268	up	1.42156	0.507476	1.42156	up	1.73779	0.797253	1.73779	up	1.83463	0.875487	1.83463	up		55902	Hs.517034	gb:AK000162.1 /DB_XREF=gi:7020069 /FEA=mRNA /CNT=1 /TID=Hs.14779.1 /TIER=ConsEnd /STK=0 /UG=Hs.14779 /LL=55902 /UG_GENE=LOC55902 /UG_TITLE=acetyl-CoA synthetase /DEF=Homo sapiens cDNA FLJ20155 fis, clone COL08754, highly similar to ACSA_ECOLI ACETYL-COENZYME A SYNTHETASE.
PRSS23	1.77218e-12	4.69989e-15	-1.53009	-0.613619	1.53009	down	-1.67117	-0.740859	1.67117	down	-1.70817	-0.772451	1.70817	down	-1.76702	-0.821322	1.76702	down	-1.70157	-0.766863	1.70157	down	-1.82432	-0.867361	1.82432	down	-1.89736	-0.923991	1.89736	down		11098	Hs.25338	gb:NM_007173.1 /DB_XREF=gi:6005881 /GEN=SPUVE /FEA=FLmRNA /CNT=198 /TID=Hs.325820.0 /TIER=FL+Stack /STK=79 /UG=Hs.325820 /LL=11098 /DEF=Homo sapiens protease, serine, 23 (SPUVE), mRNA. /PROD=protease, serine, 23 /FL=gb:BC001278.1 gb:AF193611.1 gb:AF015287.1 gb:AL136914.1 gb:NM_007173.1
HIST2H2AA3///HIST2H2AA4	2.14689e-12	5.7329e-15	2.57595	1.36511	2.57595	up	3.38273	1.75819	3.38273	up	2.46849	1.30363	2.46849	up	3.06386	1.61535	3.06386	up	2.66133	1.41215	2.66133	up	3.08486	1.6252	3.08486	up	3.3019	1.7233	3.3019	up		8337///723790	Hs.530461///Hs.745563	gb:AI313324 /DB_XREF=gi:4018929 /DB_XREF=ta77f02.x2 /CLONE=IMAGE:2050107 /FEA=EST /CNT=15 /TID=Hs.795.1 /TIER=Stack /STK=14 /UG=Hs.795 /LL=8337 /UG_GENE=H2AFO /UG_TITLE=H2A histone family, member O
ABI2	2.19073e-12	5.89003e-15	-1.7247	-0.786342	1.7247	down	-1.54385	-0.626535	1.54385	down	-1.56067	-0.642167	1.56067	down	-1.83166	-0.873152	1.83166	down	-1.49037	-0.575671	1.49037	down	-1.90881	-0.932676	1.90881	down	-1.99348	-0.995291	1.99348	down		10152	Hs.471156	gb:AA058571 /DB_XREF=gi:1551378 /DB_XREF=zf55e03.s1 /CLONE=IMAGE:380860 /FEA=EST /CNT=117 /TID=Hs.285728.0 /TIER=Stack /STK=48 /UG=Hs.285728 /UG_TITLE=ESTs
RALGPS2	2.22696e-12	6.02817e-15	-1.79208	-0.841637	1.79208	down	-2.19717	-1.13565	2.19717	down	-1.97516	-0.981966	1.97516	down	-2.11001	-1.07725	2.11001	down	-1.94145	-0.957133	1.94145	down	-2.98174	-1.57615	2.98174	down	-3.02027	-1.59468	3.02027	down		55103	Hs.632485	gb:AA732944 /DB_XREF=gi:2754303 /DB_XREF=zg78d04.s1 /CLONE=IMAGE:399463 /FEA=EST /CNT=41 /TID=Hs.5415.0 /TIER=Stack /STK=36 /UG=Hs.5415 /UG_TITLE=ESTs
SLC4A7	2.22739e-12	6.07007e-15	-2.4785	-1.30947	2.4785	down	-3.10704	-1.63554	3.10704	down	-2.48763	-1.31477	2.48763	down	-3.30973	-1.72671	3.30973	down	-2.427	-1.27918	2.427	down	-3.65571	-1.87015	3.65571	down	-4.08096	-2.02891	4.08096	down		9497	Hs.250072	gb:AF047033.1 /DB_XREF=gi:5051627 /GEN=SLC4A7 /FEA=FLmRNA /CNT=37 /TID=Hs.132904.1 /TIER=FL /STK=0 /UG=Hs.132904 /LL=9497 /DEF=Homo sapiens sodium bicarbonate cotransporter 3 (SLC4A7) mRNA, complete cds. /PROD=sodium bicarbonate cotransporter 3 /FL=gb:AF047033.1
GGT1///GGT2///GGTLC1///GGTLC2///LOC102724197	2.23198e-12	6.12341e-15	1.335	0.416836	1.335	up	1.19684	0.259231	1.19684	up	1.16909	0.225391	1.16909	up	1.44022	0.526287	1.44022	up	1.29135	0.36888	1.29135	up	1.59081	0.669762	1.59081	up	1.65853	0.729905	1.65853	up		2678///91227///92086///728441///102724197	Hs.632765///Hs.645535	gb:L20493.1 /DB_XREF=gi:306754 /FEA=FLmRNA /CNT=2 /TID=Hs.284380.3 /TIER=FL /STK=0 /UG=Hs.284380 /LL=2678 /UG_GENE=GGT1 /DEF=Human gamma-glutamyl transpeptidase mRNA, complete cds. /PROD=gamma-glutamyl transpeptidase /FL=gb:L20493.1
	2.24807e-12	6.20865e-15	-1.45906	-0.545042	1.45906	down	-1.36763	-0.451681	1.36763	down	-1.24087	-0.311352	1.24087	down	-1.51679	-0.601021	1.51679	down	-1.33514	-0.416996	1.33514	down	-1.52245	-0.606395	1.52245	down	-1.51749	-0.601687	1.51749	down			Hs.126658	gb:AW450549 /DB_XREF=gi:6991325 /DB_XREF=UI-H-BI3-akp-d-07-0-UI.s1 /CLONE=IMAGE:2734909 /FEA=EST /CNT=6 /TID=Hs.126658.0 /TIER=ConsEnd /STK=4 /UG=Hs.126658 /UG_TITLE=ESTs
DDHD2	2.37629e-12	6.60625e-15	-2.17072	-1.11817	2.17072	down	-2.45088	-1.2933	2.45088	down	-2.12894	-1.09013	2.12894	down	-2.99354	-1.58185	2.99354	down	-2.00796	-1.00573	2.00796	down	-3.46861	-1.79436	3.46861	down	-3.34957	-1.74398	3.34957	down		23259	Hs.434966	gb:AB018268.1 /DB_XREF=gi:3882170 /GEN=KIAA0725 /FEA=mRNA /CNT=101 /TID=Hs.26450.0 /TIER=Stack /STK=33 /UG=Hs.26450 /LL=23259 /DEF=Homo sapiens mRNA for KIAA0725 protein, partial cds. /PROD=KIAA0725 protein
CCDC50	2.51756e-12	7.04502e-15	-1.89162	-0.919619	1.89162	down	-2.06442	-1.04574	2.06442	down	-1.82954	-0.871483	1.82954	down	-2.06276	-1.04458	2.06276	down	-1.6773	-0.746143	1.6773	down	-2.35534	-1.23593	2.35534	down	-2.19298	-1.13289	2.19298	down		152137	Hs.478682	gb:AI247881 /DB_XREF=gi:3843278 /DB_XREF=qh58d08.x1 /CLONE=IMAGE:1848879 /FEA=EST /CNT=57 /TID=Hs.10198.0 /TIER=Stack /STK=29 /UG=Hs.10198 /UG_TITLE=ESTs
GRB10	2.58424e-12	7.27887e-15	4.01835	2.0066	4.01835	up	3.53161	1.82033	3.53161	up	3.75267	1.90792	3.75267	up	4.67278	2.22428	4.67278	up	4.42954	2.14716	4.42954	up	5.92519	2.56686	5.92519	up	5.81924	2.54083	5.81924	up		2887	Hs.164060	gb:D86962.1 /DB_XREF=gi:1503997 /GEN=KIAA0207 /FEA=FLmRNA /CNT=93 /TID=Hs.81875.3 /TIER=FL+Stack /STK=31 /UG=Hs.81875 /LL=2887 /UG_TITLE=growth factor receptor-bound protein 10 /DEF=Human mRNA for KIAA0207 gene, complete cds. /FL=gb:D86962.1 gb:AF000017.1
GBAP1	2.58908e-12	7.33987e-15	1.40562	0.491204	1.40562	up	1.46643	0.552304	1.46643	up	1.20224	0.265722	1.20224	up	1.70357	0.76856	1.70357	up	1.49563	0.580756	1.49563	up	2.22544	1.15409	2.22544	up	2.14172	1.09877	2.14172	up		2630	Hs.282997///Hs.719930	gb:D13287.1 /DB_XREF=gi:496370 /FEA=FLmRNA /CNT=9 /TID=Hs.282997.1 /TIER=FL /STK=0 /UG=Hs.282997 /LL=2629 /UG_GENE=GBA /DEF=Human mRNA for alternative splicing product of glucocerebrosidase pseudogene, complete cds. /PROD=glucocerebrosidase /FL=gb:D13287.1
CEACAM1	2.66252e-12	7.59677e-15	2.24328	1.16561	2.24328	up	2.16002	1.11105	2.16002	up	1.60754	0.684857	1.60754	up	2.18219	1.12578	2.18219	up	1.49055	0.575844	1.49055	up	2.95312	1.56224	2.95312	up	2.3285	1.2194	2.3285	up		634	Hs.512682	gb:M69176.1 /DB_XREF=gi:179434 /GEN=BGP /FEA=FLmRNA /CNT=5 /TID=Hs.50964.2 /TIER=FL /STK=2 /UG=Hs.50964 /LL=634 /DEF=Human biliary glycoprotein mRNA, complete cds. /PROD=biliary glycoprotein a /FL=gb:M69176.1
CLEC4D	2.69484e-12	7.73826e-15	6.24181	2.64196	6.24181	up	4.61867	2.20748	4.61867	up	3.62623	1.85847	3.62623	up	4.78881	2.25967	4.78881	up	3.10834	1.63615	3.10834	up	6.52808	2.70666	6.52808	up	4.67333	2.22445	4.67333	up		338339	Hs.351811	gb:NM_080387.2 /DB_XREF=gi:24475770 /GEN=CLEC-6 /TID=Hs2.351811.1 /CNT=7 /FEA=FLmRNA /TIER=FL /STK=2 /LL=121481 /UG=Hs.351811 /DEF=Homo sapiens C-type lectin-like receptor (CLEC-6), mRNA. /PROD=C-type lectin-like receptor /FL=gb:BC032313.1 gb:AF411850.1 gb:NM_080387.2
LTB4R	2.74638e-12	7.93649e-15	3.42257	1.77508	3.42257	up	2.52724	1.33756	2.52724	up	2.92446	1.54817	2.92446	up	4.0174	2.00626	4.0174	up	2.9767	1.57371	2.9767	up	3.78567	1.92055	3.78567	up	3.99865	1.99951	3.99865	up		1241	Hs.567248	gb:AW206817 /DB_XREF=gi:6506313 /DB_XREF=UI-H-BI1-afa-b-09-0-UI.s1 /CLONE=IMAGE:2720992 /FEA=EST /CNT=8 /TID=Hs.158186.0 /TIER=ConsEnd /STK=6 /UG=Hs.158186 /UG_TITLE=ESTs
MAP2K6	2.75469e-12	8.01089e-15	2.8866	1.52937	2.8866	up	2.11633	1.08157	2.11633	up	1.88077	0.911322	1.88077	up	3.15939	1.65965	3.15939	up	2.23593	1.16088	2.23593	up	3.74322	1.90428	3.74322	up	3.50634	1.80997	3.50634	up		5608	Hs.463978	gb:NM_002758.1 /DB_XREF=gi:10835026 /GEN=MAP2K6 /FEA=FLmRNA /CNT=39 /TID=Hs.118825.0 /TIER=FL+Stack /STK=13 /UG=Hs.118825 /LL=5608 /DEF=Homo sapiens mitogen-activated protein kinase kinase 6 (MAP2K6), mRNA. /PROD=mitogen-activated protein kinase kinase 6 /FL=gb:U39065.1 gb:U49732.1 gb:D87905.1 gb:NM_002758.1 gb:U39656.1 gb:U39657.1
	2.80611e-12	8.21175e-15	1.34893	0.431816	1.34893	up	1.53049	0.613998	1.53049	up	1.54968	0.631966	1.54968	up	1.69537	0.761602	1.69537	up	1.70948	0.773558	1.70948	up	1.8549	0.891344	1.8549	up	2.29381	1.19775	2.29381	up			Hs.656252	gb:AI693193 /DB_XREF=gi:4970533 /DB_XREF=wd68f02.x1 /CLONE=IMAGE:2336763 /FEA=EST /CNT=40 /TID=Hs.247551.2 /TIER=Stack /STK=12 /UG=Hs.247551 /LL=4580 /UG_GENE=MTX1 /UG_TITLE=metaxin 1
SIGLEC9	2.8091e-12	8.27189e-15	2.34535	1.2298	2.34535	up	2.15258	1.10607	2.15258	up	1.87772	0.908982	1.87772	up	2.76561	1.4676	2.76561	up	1.83591	0.876499	1.83591	up	2.7607	1.46504	2.7607	up	2.70773	1.43708	2.70773	up		27180	Hs.245828	gb:AF247180.1 /DB_XREF=gi:9392623 /FEA=FLmRNA /CNT=8 /TID=Hs.245828.0 /TIER=FL /STK=0 /UG=Hs.245828 /LL=27180 /UG_GENE=SIGLEC9 /DEF=Homo sapiens sialic acid-binding immunoglobulin-like lectin-9 mRNA, complete cds. /PROD=sialic acid-binding immunoglobulin-likelectin-9 /FL=gb:AF247180.1 gb:AF227924.1
PCSK5	2.81951e-12	8.3541e-15	-1.27318	-0.34844	1.27318	down	-1.36722	-0.451246	1.36722	down	-1.28973	-0.367063	1.28973	down	-1.51038	-0.594908	1.51038	down	-1.19808	-0.26072	1.19808	down	-1.72852	-0.789538	1.72852	down	-1.55134	-0.633514	1.55134	down		5125	Hs.368542	gb:AU152579 /DB_XREF=gi:11014100 /DB_XREF=AU152579 /CLONE=NT2RP3001232 /FEA=mRNA /CNT=34 /TID=Hs.288931.0 /TIER=Stack /STK=11 /UG=Hs.288931 /UG_TITLE=Homo sapiens cDNA FLJ13034 fis, clone NT2RP3001232
METTL9	2.85287e-12	8.50512e-15	2.65689	1.40974	2.65689	up	2.12615	1.08825	2.12615	up	2.26373	1.1787	2.26373	up	2.6194	1.38924	2.6194	up	2.3813	1.25175	2.3813	up	2.97683	1.57378	2.97683	up	2.65381	1.40806	2.65381	up		51108	Hs.279583	gb:BC000195.1 /DB_XREF=gi:12652878 /FEA=FLmRNA /CNT=226 /TID=Hs.279583.0 /TIER=FL+Stack /STK=30 /UG=Hs.279583 /LL=51108 /UG_GENE=DREV1 /DEF=Homo sapiens, Similar to CGI-81 protein, clone MGC:705, mRNA, complete cds. /PROD=Similar to CGI-81 protein /FL=gb:NM_016025.1 gb:AF151839.1 gb:BC000195.1
STXBP2	3.2884e-12	9.86369e-15	1.71655	0.779512	1.71655	up	1.84395	0.8828	1.84395	up	1.54905	0.631379	1.54905	up	2.56644	1.35977	2.56644	up	1.82032	0.864192	1.82032	up	2.59015	1.37304	2.59015	up	3.21624	1.68538	3.21624	up		6813	Hs.515104	gb:AB002559.1 /DB_XREF=gi:1944129 /FEA=FLmRNA /CNT=105 /TID=Hs.90535.0 /TIER=FL+Stack /STK=26 /UG=Hs.90535 /LL=6813 /UG_GENE=STXBP2 /DEF=Homo sapiens mRNA for hunc18b2, complete cds. /PROD=hunc18b2 /FL=gb:NM_006949.1 gb:BC002869.1 gb:AB002559.1 gb:U63533.1
CD96	3.47028e-12	1.04727e-14	-3.05561	-1.61146	3.05561	down	-2.68035	-1.42242	2.68035	down	-2.35838	-1.23779	2.35838	down	-3.44862	-1.78602	3.44862	down	-2.0284	-1.02035	2.0284	down	-3.33412	-1.73731	3.33412	down	-3.10489	-1.63454	3.10489	down		10225	Hs.142023	gb:NM_005816.1 /DB_XREF=gi:5032140 /GEN=TACTILE /FEA=FLmRNA /CNT=9 /TID=Hs.142023.0 /TIER=FL /STK=1 /UG=Hs.142023 /LL=10225 /DEF=Homo sapiens T cell activation, increased late expression (TACTILE), mRNA. /PROD=T cell activation, increased late expression /FL=gb:M88282.1 gb:NM_005816.1
NLRP1	3.5935e-12	1.09103e-14	-1.55907	-0.640688	1.55907	down	-1.54445	-0.627096	1.54445	down	-1.33094	-0.412443	1.33094	down	-1.51777	-0.601956	1.51777	down	-1.39474	-0.479992	1.39474	down	-2.1022	-1.0719	2.1022	down	-1.64801	-0.720723	1.64801	down		22861	Hs.652273	gb:AF310105.1 /DB_XREF=gi:11096302 /FEA=FLmRNA /CNT=25 /TID=Hs.104305.0 /TIER=FL /STK=1 /UG=Hs.104305 /LL=22861 /UG_GENE=DEFCAP /DEF=Homo sapiens NALP1 mRNA, complete cds. /PROD=NALP1 /FL=gb:AF229059.1 gb:AB023143.1 gb:NM_014922.1 gb:AF310105.1
MTF1	4.3966e-12	1.3429e-14	1.84563	0.884115	1.84563	up	1.75787	0.813831	1.75787	up	1.64164	0.715135	1.64164	up	2.17258	1.11941	2.17258	up	1.78349	0.8347	1.78349	up	2.19331	1.13311	2.19331	up	2.51089	1.3282	2.51089	up		4520	Hs.471991	gb:NM_005955.1 /DB_XREF=gi:5174588 /GEN=MTF1 /FEA=FLmRNA /CNT=43 /TID=Hs.211581.0 /TIER=FL /STK=0 /UG=Hs.211581 /LL=4520 /DEF=Homo sapiens metal-regulatory transcription factor 1 (MTF1), mRNA. /PROD=metal-regulatory transcription factor 1 /FL=gb:NM_005955.1
SFT2D3	4.5246e-12	1.39027e-14	-1.31756	-0.397866	1.31756	down	-1.5597	-0.641266	1.5597	down	-1.40827	-0.49392	1.40827	down	-1.50697	-0.591651	1.50697	down	-1.31701	-0.397265	1.31701	down	-1.74732	-0.805145	1.74732	down	-1.63729	-0.711311	1.63729	down		84826	Hs.345849	gb:AI304320 /DB_XREF=gi:3988009 /DB_XREF=qo57g10.x1 /CLONE=IMAGE:1912674 /FEA=EST /CNT=54 /TID=Hs.101660.0 /TIER=Stack /STK=32 /UG=Hs.101660 /UG_TITLE=ESTs, Weakly similar to ALU1_HUMAN ALU SUBFAMILY J SEQUENCE CONTAMINATION WARNING ENTRY (H.sapiens)
DDAH2	5.03443e-12	1.56535e-14	1.7937	0.842939	1.7937	up	1.59026	0.669262	1.59026	up	1.31243	0.392242	1.31243	up	1.78084	0.832559	1.78084	up	1.51702	0.601239	1.51702	up	2.29112	1.19605	2.29112	up	2.36223	1.24015	2.36223	up		23564	Hs.247362	gb:NM_013974.1 /DB_XREF=gi:7524353 /GEN=DDAH2 /FEA=FLmRNA /CNT=182 /TID=Hs.247362.0 /TIER=FL+Stack /STK=94 /UG=Hs.247362 /LL=23564 /DEF=Homo sapiens dimethylarginine dimethylaminohydrolase 2 (DDAH2), mRNA. /PROD=dimethylarginine dimethylaminohydrolase 2 /FL=gb:BC001435.1 gb:NM_013974.1 gb:AF070667.1
KCNE1///LOC102723475	5.03443e-12	1.56204e-14	2.60378	1.38061	2.60378	up	2.23989	1.16343	2.23989	up	1.93362	0.951304	1.93362	up	3.51816	1.81482	3.51816	up	2.46325	1.30056	2.46325	up	5.04521	2.33492	5.04521	up	4.399	2.13718	4.399	up		3753///102723475	Hs.121495	gb:R73518 /DB_XREF=gi:847550 /DB_XREF=yj93h12.s1 /CLONE=IMAGE:156359 /FEA=EST /CNT=7 /TID=Hs.151079.0 /TIER=ConsEnd /STK=7 /UG=Hs.151079 /UG_TITLE=ESTs
CD200	5.07051e-12	1.59288e-14	-1.62105	-0.696925	1.62105	down	-2.30346	-1.2038	2.30346	down	-1.85586	-0.892087	1.85586	down	-1.99949	-0.999632	1.99949	down	-1.74985	-0.807233	1.74985	down	-3.03641	-1.60237	3.03641	down	-3.202	-1.67897	3.202	down		4345	Hs.79015	gb:AF063591.1 /DB_XREF=gi:12002013 /FEA=FLmRNA /CNT=108 /TID=Hs.79015.0 /TIER=FL+Stack /STK=37 /UG=Hs.79015 /LL=4345 /UG_GENE=MOX2 /DEF=Homo sapiens brain my033 protein mRNA, complete cds. /PROD=brain my033 protein /FL=gb:AF063591.1
	5.07051e-12	1.59511e-14	-1.45889	-0.544868	1.45889	down	-1.69874	-0.764468	1.69874	down	-1.43823	-0.524298	1.43823	down	-1.75088	-0.808084	1.75088	down	-1.36002	-0.443628	1.36002	down	-1.72573	-0.787211	1.72573	down	-1.77296	-0.826156	1.77296	down				gb:AI651510 /DB_XREF=gi:4735489 /DB_XREF=wb06f02.x1 /CLONE=IMAGE:2304891 /FEA=EST /CNT=20 /TID=Hs.268474.0 /TIER=Stack /STK=9 /UG=Hs.268474 /UG_TITLE=ESTs, Weakly similar to S23650 retrovirus-related hypothetical protein II (H.sapiens)
CD63	5.08438e-12	1.60877e-14	2.44156	1.2878	2.44156	up	2.42325	1.27694	2.42325	up	2.27014	1.18278	2.27014	up	2.67671	1.42046	2.67671	up	2.42822	1.2799	2.42822	up	3.27752	1.71261	3.27752	up	3.36001	1.74847	3.36001	up		967	Hs.445570	gb:NM_001780.1 /DB_XREF=gi:4502678 /GEN=CD63 /FEA=FLmRNA /CNT=457 /TID=Hs.76294.0 /TIER=FL+Stack /STK=177 /UG=Hs.76294 /LL=967 /DEF=Homo sapiens CD63 antigen (melanoma 1 antigen) (CD63), mRNA. /PROD=CD63 antigen (melanoma 1 antigen) /FL=gb:BC002349.1 gb:NM_001780.1 gb:M59907.1
HLA-DPB1	5.74683e-12	1.8289e-14	-2.63984	-1.40045	2.63984	down	-2.95736	-1.56431	2.95736	down	-2.45241	-1.2942	2.45241	down	-2.48353	-1.31239	2.48353	down	-2.13824	-1.09642	2.13824	down	-3.89351	-1.96107	3.89351	down	-4.12327	-2.04379	4.12327	down		3115	Hs.485130	gb:NM_002121.1 /DB_XREF=gi:4504404 /GEN=HLA-DPB1 /FEA=FLmRNA /CNT=360 /TID=Hs.814.0 /TIER=FL+Stack /STK=123 /UG=Hs.814 /LL=3115 /DEF=Homo sapiens major histocompatibility complex, class II, DP beta 1 (HLA-DPB1), mRNA. /PROD=major histocompatibility complex, class II, DPbeta 1 /FL=gb:NM_002121.1 gb:J03041.1 gb:M57466.1 gb:M83664.1 gb:M28202.1 gb:M28200.1
MMP8	5.83422e-12	1.87114e-14	23.6284	4.56245	23.6284	up	9.26163	3.21127	9.26163	up	7.19814	2.84762	7.19814	up	11.4477	3.51698	11.4477	up	12.6121	3.65673	12.6121	up	41.9008	5.38891	41.9008	up	18.8241	4.23451	18.8241	up		4317	Hs.161839	gb:NM_002424.1 /DB_XREF=gi:4505220 /GEN=MMP8 /FEA=FLmRNA /CNT=6 /TID=Hs.73862.0 /TIER=FL /STK=0 /UG=Hs.73862 /LL=4317 /DEF=Homo sapiens matrix metalloproteinase 8 (neutrophil collagenase) (MMP8), mRNA. /PROD=matrix metalloproteinase 8 preproprotein /FL=gb:NM_002424.1 gb:J05556.1
ENTPD7	5.83422e-12	1.87805e-14	2.205	1.14078	2.205	up	1.34402	0.426554	1.34402	up	1.36038	0.444006	1.36038	up	1.68449	0.752309	1.68449	up	1.30228	0.381039	1.30228	up	2.05763	1.04098	2.05763	up	1.77763	0.829952	1.77763	up		57089	Hs.744948	gb:NM_020354.1 /DB_XREF=gi:9966820 /GEN=LALP1 /FEA=FLmRNA /CNT=10 /TID=Hs.22604.0 /TIER=FL /STK=0 /UG=Hs.22604 /LL=57089 /DEF=Homo sapiens lysosomal apyrase-like protein 1 (LALP1), mRNA. /PROD=lysosomal apyrase-like protein 1 /FL=gb:AF269255.1 gb:NM_020354.1
HVCN1	6.54883e-12	2.12006e-14	-1.56373	-0.644995	1.56373	down	-1.71346	-0.77691	1.71346	down	-1.49104	-0.576317	1.49104	down	-1.54534	-0.627928	1.54534	down	-1.50159	-0.586495	1.50159	down	-2.23052	-1.15738	2.23052	down	-1.98877	-0.991879	1.98877	down		84329	Hs.334637	gb:AW406569 /DB_XREF=gi:6925626 /DB_XREF=UI-HF-BL0-acu-g-06-0-UI.r1 /CLONE=IMAGE:3060299 /FEA=EST /CNT=51 /TID=Hs.11500.1 /TIER=Stack /STK=16 /UG=Hs.11500 /LL=79600 /UG_GENE=FLJ21127 /UG_TITLE=hypothetical protein FLJ21127
PRSS23	7.16226e-12	2.33175e-14	-1.53525	-0.618471	1.53525	down	-1.66383	-0.734505	1.66383	down	-1.55998	-0.641531	1.55998	down	-1.8437	-0.882607	1.8437	down	-1.83784	-0.878012	1.83784	down	-1.85232	-0.889332	1.85232	down	-1.95159	-0.964649	1.95159	down		11098	Hs.25338	gb:AW471145 /DB_XREF=gi:7041251 /DB_XREF=xu08c06.x1 /CLONE=IMAGE:2799562 /FEA=EST /CNT=57 /TID=Hs.25338.0 /TIER=Stack /STK=33 /UG=Hs.25338 /UG_TITLE=ESTs
SLC2A14///SLC2A3	7.20868e-12	2.36004e-14	3.59733	1.84693	3.59733	up	2.44608	1.29047	2.44608	up	2.88727	1.52971	2.88727	up	4.1146	2.04075	4.1146	up	2.66482	1.41404	2.66482	up	4.47456	2.16175	4.47456	up	4.20524	2.07219	4.20524	up		6515///144195	Hs.419240///Hs.655169	gb:AL110298.1 /DB_XREF=gi:5817258 /GEN=DKFZp564K1672 /FEA=mRNA /CNT=3 /TID=Hs.7594.2 /TIER=ConsEnd /STK=2 /UG=Hs.7594 /LL=6515 /DEF=Homo sapiens mRNA; cDNA DKFZp564K1672 (from clone DKFZp564K1672); partial cds. /PROD=hypothetical protein
PTCH1	7.84151e-12	2.58157e-14	-1.75505	-0.81151	1.75505	down	-1.61785	-0.694076	1.61785	down	-1.83189	-0.87333	1.83189	down	-1.92371	-0.94389	1.92371	down	-1.56825	-0.649152	1.56825	down	-2.25036	-1.17016	2.25036	down	-2.0885	-1.06247	2.0885	down		5727	Hs.494538	gb:BG054916 /DB_XREF=gi:12512119 /DB_XREF=nac92b02.x1 /CLONE=IMAGE:3441723 /FEA=FLmRNA /CNT=48 /TID=Hs.159526.0 /TIER=Stack /STK=10 /UG=Hs.159526 /LL=5727 /UG_GENE=PTCH /UG_TITLE=patched (Drosophila) homolog /FL=gb:U43148.1
SEMA4A	8.07477e-12	2.67313e-14	2.15922	1.11051	2.15922	up	1.95121	0.964368	1.95121	up	1.94356	0.958698	1.94356	up	2.85943	1.51573	2.85943	up	2.11875	1.08322	2.11875	up	2.60798	1.38293	2.60798	up	3.16517	1.66228	3.16517	up		64218	Hs.408846	gb:NM_022367.1 /DB_XREF=gi:11641290 /GEN=FLJ12287 /FEA=FLmRNA /CNT=45 /TID=Hs.7634.0 /TIER=FL+Stack /STK=22 /UG=Hs.7634 /LL=64218 /DEF=Homo sapiens hypothetical protein FLJ12287 similar to semaphorins (FLJ12287), mRNA. /PROD=hypothetical protein FLJ12287 similar tosemaphorins /FL=gb:AB029394.1 gb:NM_022367.1
SIRPA	8.26844e-12	2.77289e-14	2.28797	1.19407	2.28797	up	2.07191	1.05096	2.07191	up	2.06861	1.04866	2.06861	up	2.85749	1.51475	2.85749	up	2.22309	1.15256	2.22309	up	2.97156	1.57122	2.97156	up	3.46147	1.79138	3.46147	up		140885	Hs.581021	gb:NM_004648.1 /DB_XREF=gi:4758977 /GEN=PTPNS1 /FEA=FLmRNA /CNT=141 /TID=Hs.156114.0 /TIER=FL+Stack /STK=8 /UG=Hs.156114 /LL=8194 /DEF=Homo sapiens protein tyrosine phosphatase, non-receptor type substrate 1 (PTPNS1), mRNA. /PROD=protein tyrosine phosphatase, non-receptor typesubstrate 1 /FL=gb:AB023430.1 gb:NM_004648.1 gb:D86043.1
SYN2	8.26844e-12	2.75725e-14	2.39209	1.25827	2.39209	up	1.49923	0.584221	1.49923	up	1.39582	0.481109	1.39582	up	1.97899	0.984767	1.97899	up	1.48355	0.569049	1.48355	up	1.9781	0.984112	1.9781	up	1.7122	0.775853	1.7122	up		6854	Hs.445503	gb:AW139618 /DB_XREF=gi:6144336 /DB_XREF=UI-H-BI1-aea-h-11-0-UI.s1 /CLONE=IMAGE:2718956 /FEA=FLmRNA /CNT=15 /TID=Hs.6439.1 /TIER=Stack /STK=10 /UG=Hs.6439 /LL=6854 /UG_GENE=SYN2 /UG_TITLE=synapsin II /FL=gb:AF077671.1
	8.26844e-12	2.78261e-14	4.88418	2.28812	4.88418	up	4.99061	2.31922	4.99061	up	3.28884	1.71758	3.28884	up	4.79576	2.26176	4.79576	up	3.14928	1.65502	3.14928	up	5.25521	2.39375	5.25521	up	4.8104	2.26616	4.8104	up				gb:AW016812 /DB_XREF=gi:5865569 /DB_XREF=UI-H-BI0-aam-c-06-0-UI.s1 /CLONE=IMAGE:2709874 /FEA=EST /CNT=8 /TID=Hs.200266.0 /TIER=Stack /STK=8 /UG=Hs.200266 /UG_TITLE=ESTs
TKT	8.28863e-12	2.80457e-14	1.52813	0.611771	1.52813	up	1.30484	0.383871	1.30484	up	1.56586	0.646956	1.56586	up	1.90615	0.930663	1.90615	up	1.41752	0.503373	1.41752	up	1.89598	0.922942	1.89598	up	1.95746	0.96898	1.95746	up		7086	Hs.89643	gb:AU152969 /DB_XREF=gi:11014490 /DB_XREF=AU152969 /CLONE=NT2RP3002113 /FEA=EST /CNT=27 /TID=Hs.89643.1 /TIER=Stack /STK=19 /UG=Hs.89643 /LL=7086 /UG_GENE=TKT /UG_TITLE=transketolase (Wernicke-Korsakoff syndrome)
ZNF502	8.33978e-12	2.83713e-14	-1.29146	-0.369003	1.29146	down	-1.45801	-0.543997	1.45801	down	-1.28698	-0.363987	1.28698	down	-1.55866	-0.640304	1.55866	down	-1.41526	-0.501064	1.41526	down	-1.53269	-0.616062	1.53269	down	-1.571	-0.651679	1.571	down		91392	Hs.224843	gb:AI056364 /DB_XREF=gi:3330230 /DB_XREF=oy48c02.x1 /CLONE=IMAGE:1669058 /FEA=EST /CNT=18 /TID=Hs.62592.0 /TIER=Stack /STK=15 /UG=Hs.62592 /UG_TITLE=ESTs
ZNF84	1.0034e-11	3.43183e-14	-1.72925	-0.790147	1.72925	down	-1.69052	-0.757468	1.69052	down	-1.65338	-0.72542	1.65338	down	-2.16572	-1.11484	2.16572	down	-1.62483	-0.700286	1.62483	down	-2.30284	-1.20341	2.30284	down	-2.2487	-1.16909	2.2487	down		7637	Hs.445019	gb:W92744 /DB_XREF=gi:1421916 /DB_XREF=zd92g07.s1 /CLONE=IMAGE:356988 /FEA=EST /CNT=26 /TID=Hs.22664.0 /TIER=Stack /STK=24 /UG=Hs.22664 /UG_TITLE=ESTs
RORA	1.0389e-11	3.5869e-14	-4.59678	-2.20062	4.59678	down	-3.469	-1.79452	3.469	down	-3.34583	-1.74236	3.34583	down	-5.84024	-2.54603	5.84024	down	-3.79232	-1.92308	3.79232	down	-6.57289	-2.71653	6.57289	down	-6.64918	-2.73318	6.64918	down		6095	Hs.560343	gb:AW006185 /DB_XREF=gi:5854963 /DB_XREF=wz93c08.x1 /CLONE=IMAGE:2566382 /FEA=EST /CNT=46 /TID=Hs.293968.0 /TIER=Stack /STK=20 /UG=Hs.293968 /UG_TITLE=ESTs
ZNF438	1.0389e-11	3.59125e-14	2.41141	1.26988	2.41141	up	2.09996	1.07036	2.09996	up	1.91403	0.936612	1.91403	up	2.46835	1.30354	2.46835	up	1.94767	0.961752	1.94767	up	2.62567	1.39269	2.62567	up	2.65283	1.40753	2.65283	up		220929	Hs.660642	gb:AI886666 /DB_XREF=gi:5591830 /DB_XREF=wn18a09.x1 /CLONE=IMAGE:2445784 /FEA=EST /CNT=17 /TID=Hs.104403.0 /TIER=Stack /STK=13 /UG=Hs.104403 /UG_TITLE=ESTs
SIGLEC5	1.059e-11	3.68013e-14	2.72151	1.44441	2.72151	up	2.91895	1.54545	2.91895	up	2.35199	1.23388	2.35199	up	3.01566	1.59247	3.01566	up	2.47101	1.3051	2.47101	up	3.45887	1.7903	3.45887	up	3.56847	1.83531	3.56847	up		8778	Hs.310333	gb:NM_003830.1 /DB_XREF=gi:4502658 /GEN=SIGLEC5 /FEA=FLmRNA /CNT=16 /TID=Hs.117005.0 /TIER=FL /STK=5 /UG=Hs.117005 /LL=8778 /DEF=Homo sapiens sialic acid binding Ig-like lectin 5 (SIGLEC5), mRNA. /PROD=sialic acid binding Ig-like lectin 5 /FL=gb:AF170484.1 gb:U71383.1 gb:NM_003830.1
TMC4	1.06146e-11	3.70806e-14	1.21213	0.277547	1.21213	up	1.17634	0.234302	1.17634	up	1.16078	0.215091	1.16078	up	1.30804	0.387405	1.30804	up	1.17252	0.229612	1.17252	up	1.62156	0.697381	1.62156	up	1.45736	0.543356	1.45736	up		147798	Hs.355126	gb:BE645551 /DB_XREF=gi:9969862 /DB_XREF=7e72b08.x1 /CLONE=IMAGE:3287991 /FEA=EST /CNT=44 /TID=Hs.112184.1 /TIER=Stack /STK=27 /UG=Hs.112184 /LL=26173 /UG_GENE=DKFZP586J0619 /UG_TITLE=DKFZP586J0619 protein
SCML1	1.12968e-11	3.96706e-14	-3.01073	-1.59011	3.01073	down	-3.31609	-1.72948	3.31609	down	-2.98232	-1.57644	2.98232	down	-3.71499	-1.89336	3.71499	down	-2.93381	-1.55278	2.93381	down	-3.73321	-1.90042	3.73321	down	-4.37205	-2.12831	4.37205	down		6322	Hs.109655	gb:NM_006746.1 /DB_XREF=gi:5803158 /GEN=SCML1 /FEA=FLmRNA /CNT=77 /TID=Hs.109655.0 /TIER=FL+Stack /STK=11 /UG=Hs.109655 /LL=6322 /DEF=Homo sapiens sex comb on midleg (Drosophila)-like 1 (SCML1), mRNA. /PROD=sex comb on midleg (Drosophila)-like 1 /FL=gb:NM_006746.1 gb:AF160728.1
ZNF85	1.2235e-11	4.3189e-14	-1.43392	-0.519963	1.43392	down	-1.59887	-0.677054	1.59887	down	-1.46326	-0.549189	1.46326	down	-1.64604	-0.718995	1.64604	down	-1.51088	-0.595384	1.51088	down	-1.6079	-0.685182	1.6079	down	-1.68778	-0.755126	1.68778	down		7639	Hs.37138	gb:NM_003429.1 /DB_XREF=gi:4508038 /GEN=ZNF85 /FEA=FLmRNA /CNT=15 /TID=Hs.37138.0 /TIER=FL /STK=0 /UG=Hs.37138 /LL=7639 /DEF=Homo sapiens zinc finger protein 85 (HPF4, HTF1) (ZNF85), mRNA. /PROD=zinc finger protein 85 (HPF4, HTF1) /FL=gb:U35376.1 gb:NM_003429.1
ACER3	1.2691e-11	4.50305e-14	3.11438	1.63895	3.11438	up	2.68841	1.42675	2.68841	up	2.17782	1.12289	2.17782	up	2.94707	1.55928	2.94707	up	1.84738	0.88548	1.84738	up	3.81314	1.93098	3.81314	up	3.2231	1.68845	3.2231	up		55331	Hs.23862	gb:R12678 /DB_XREF=gi:765754 /DB_XREF=yf40c04.s1 /CLONE=IMAGE:129318 /FEA=FLmRNA /CNT=80 /TID=Hs.23862.0 /TIER=Stack /STK=12 /UG=Hs.23862 /LL=55331 /UG_GENE=FLJ11238 /UG_TITLE=hypothetical protein FLJ11238 /FL=gb:NM_018367.1
LILRA6///LILRB2///LILRB3///LOC102725015///LOC102725029///LOC102725031///LOC102725034///LOC102725035	1.27073e-11	4.5321e-14	1.6389	0.712728	1.6389	up	1.84392	0.882779	1.84392	up	1.62484	0.7003	1.62484	up	2.12381	1.08666	2.12381	up	1.64569	0.718692	1.64569	up	2.19118	1.13171	2.19118	up	2.58472	1.37001	2.58472	up		10288///11025///79168///102725015///102725029///102725031///102725034///102725035	Hs.631592///Hs.688335	gb:AF009644.1 /DB_XREF=gi:2662447 /FEA=FLmRNA /CNT=1 /TID=Hs.105928.4 /TIER=FL /STK=0 /UG=Hs.105928 /LL=11025 /UG_GENE=LILRB3 /DEF=Homo sapiens clone 41 immunoglobulin-like transcript 5 protein mRNA, complete cds. /PROD=immunoglobulin-like transcript 5 protein /FL=gb:AF009644.1
B4GALT5	1.27162e-11	4.55853e-14	2.70935	1.43795	2.70935	up	3.71083	1.89174	3.71083	up	2.53205	1.34031	2.53205	up	2.87486	1.52349	2.87486	up	2.35155	1.23361	2.35155	up	3.72724	1.89811	3.72724	up	4.31602	2.1097	4.31602	up		9334	Hs.370487	gb:BF691447 /DB_XREF=gi:11976855 /DB_XREF=602247615F1 /CLONE=IMAGE:4332866 /FEA=FLmRNA /CNT=236 /TID=Hs.107526.0 /TIER=Stack /STK=25 /UG=Hs.107526 /LL=9334 /UG_GENE=B4GALT5 /UG_TITLE=UDP-Gal:betaGlcNAc beta 1,4- galactosyltransferase, polypeptide 5 /FL=gb:AB004550.1 gb:NM_004776.1 gb:AF038663.1
CAMK2D	1.29118e-11	4.65227e-14	-2.44712	-1.29108	2.44712	down	-2.5362	-1.34267	2.5362	down	-2.16344	-1.11333	2.16344	down	-2.66338	-1.41326	2.66338	down	-2.01482	-1.01065	2.01482	down	-3.30022	-1.72256	3.30022	down	-3.24763	-1.69939	3.24763	down		817	Hs.144114	gb:AA029441 /DB_XREF=gi:1496854 /DB_XREF=ze96c08.s1 /CLONE=IMAGE:366830 /FEA=EST /CNT=40 /TID=Hs.32553.0 /TIER=Stack /STK=17 /UG=Hs.32553 /UG_TITLE=ESTs
FLOT1	1.31993e-11	4.77998e-14	2.88228	1.52721	2.88228	up	2.66885	1.41622	2.66885	up	2.26076	1.17681	2.26076	up	3.57021	1.83601	3.57021	up	2.36034	1.239	2.36034	up	3.9741	1.99063	3.9741	up	4.21628	2.07597	4.21628	up		10211	Hs.179986	gb:AA507012 /DB_XREF=gi:2243451 /DB_XREF=ni04f03.s1 /CLONE=IMAGE:967037 /FEA=FLmRNA /CNT=291 /TID=Hs.179986.0 /TIER=Stack /STK=13 /UG=Hs.179986 /LL=10211 /UG_GENE=FLOT1 /UG_TITLE=flotillin 1 /FL=gb:BC001146.1 gb:AF089750.2 gb:NM_005803.2 gb:AF085357.1
TSPO	1.42381e-11	5.26034e-14	2.22637	1.15469	2.22637	up	2.147	1.10232	2.147	up	1.94337	0.958561	1.94337	up	2.69215	1.42876	2.69215	up	2.14402	1.10032	2.14402	up	3.04272	1.60536	3.04272	up	3.02789	1.59831	3.02789	up		706	Hs.202	gb:NM_000714.2 /DB_XREF=gi:6382068 /GEN=BZRP /FEA=FLmRNA /CNT=226 /TID=Hs.202.1 /TIER=FL+Stack /STK=133 /UG=Hs.202 /LL=706 /DEF=Homo sapiens benzodiazapine receptor (peripheral) (BZRP), nuclear gene encoding mitochondrial protein, transcript variant PBR, mRNA. /PROD=peripheral benzodiazapine receptor /FL=gb:BC001110.1 gb:M36035.1 gb:NM_000714.2
MEF2C	1.42381e-11	5.24493e-14	-1.8586	-0.894214	1.8586	down	-1.61486	-0.691408	1.61486	down	-1.54287	-0.62562	1.54287	down	-1.99888	-0.999191	1.99888	down	-1.76881	-0.822779	1.76881	down	-3.04068	-1.60439	3.04068	down	-2.68134	-1.42295	2.68134	down		4208	Hs.649965	gb:N22468 /DB_XREF=gi:1128602 /DB_XREF=yw34e10.s1 /CLONE=IMAGE:254154 /FEA=FLmRNA /CNT=240 /TID=Hs.78995.1 /TIER=Stack /STK=23 /UG=Hs.78995 /LL=4208 /UG_GENE=MEF2C /UG_TITLE=MADS box transcription enhancer factor 2, polypeptide C (myocyte enhancer factor 2C) /FL=gb:L08895.1
METTL9	1.42381e-11	5.1846e-14	1.98405	0.988448	1.98405	up	1.74227	0.800971	1.74227	up	1.94421	0.959185	1.94421	up	2.01449	1.01042	2.01449	up	1.84052	0.880115	1.84052	up	2.26758	1.18115	2.26758	up	2.03387	1.02423	2.03387	up		51108	Hs.279583	gb:NM_016025.1 /DB_XREF=gi:7705788 /GEN=DREV1 /FEA=FLmRNA /CNT=226 /TID=Hs.279583.0 /TIER=FL+Stack /STK=11 /UG=Hs.279583 /LL=51108 /DEF=Homo sapiens CGI-81 protein (DREV1), mRNA. /PROD=CGI-81 protein /FL=gb:NM_016025.1 gb:AF151839.1 gb:BC000195.1
PLBD1	1.42381e-11	5.22989e-14	3.25258	1.70159	3.25258	up	2.86324	1.51765	2.86324	up	2.87357	1.52285	2.87357	up	4.23711	2.08308	4.23711	up	3.06451	1.61565	3.06451	up	3.64192	1.8647	3.64192	up	3.73628	1.9016	3.73628	up		79887	Hs.131933	gb:NM_024829.1 /DB_XREF=gi:13376231 /GEN=FLJ22662 /FEA=FLmRNA /CNT=105 /TID=Hs.178470.0 /TIER=FL+Stack /STK=42 /UG=Hs.178470 /LL=79887 /DEF=Homo sapiens hypothetical protein FLJ22662 (FLJ22662), mRNA. /PROD=hypothetical protein FLJ22662 /FL=gb:NM_024829.1
MRPS25	1.43179e-11	5.31604e-14	-1.86549	-0.899557	1.86549	down	-2.08821	-1.06227	2.08821	down	-1.82398	-0.867092	1.82398	down	-2.2979	-1.20032	2.2979	down	-1.65862	-0.729981	1.65862	down	-2.50423	-1.32437	2.50423	down	-2.36551	-1.24215	2.36551	down		64432	Hs.657764	gb:AI571166 /DB_XREF=gi:4534540 /DB_XREF=tn85h11.x1 /CLONE=IMAGE:2176389 /FEA=EST /CNT=35 /TID=Hs.29904.0 /TIER=Stack /STK=12 /UG=Hs.29904 /UG_TITLE=ESTs
PSTPIP2	1.4343e-11	5.35157e-14	3.72172	1.89597	3.72172	up	2.09214	1.06498	2.09214	up	1.96495	0.974495	1.96495	up	3.74379	1.9045	3.74379	up	2.4227	1.27662	2.4227	up	4.34501	2.11936	4.34501	up	3.11801	1.64063	3.11801	up		9050	Hs.567384	gb:NM_024430.1 /DB_XREF=gi:13270468 /GEN=PSTPIP2 /FEA=FLmRNA /CNT=16 /TID=Hs.69149.0 /TIER=FL /STK=1 /UG=Hs.69149 /LL=9050 /DEF=Homo sapiens proline-serine-threonine phosphatase interacting protein 2 (PSTPIP2), mRNA. /PROD=proline-serine-threonine phosphatase interactingprotein 2 /FL=gb:NM_024430.1
CTSD	1.46297e-11	5.48532e-14	1.58362	0.663223	1.58362	up	1.83269	0.87396	1.83269	up	1.68407	0.751949	1.68407	up	2.26965	1.18247	2.26965	up	1.92607	0.94566	1.92607	up	2.5689	1.36115	2.5689	up	2.99612	1.5831	2.99612	up		1509	Hs.654447	gb:NM_001909.1 /DB_XREF=gi:4503142 /GEN=CTSD /FEA=FLmRNA /CNT=460 /TID=Hs.79572.0 /TIER=FL+Stack /STK=151 /UG=Hs.79572 /LL=1509 /DEF=Homo sapiens cathepsin D (lysosomal aspartyl protease) (CTSD), mRNA. /PROD=cathepsin D (lysosomal aspartyl protease) /FL=gb:NM_001909.1 gb:M11233.1
LIPT1	1.49557e-11	5.63487e-14	-1.73117	-0.791751	1.73117	down	-1.80451	-0.851603	1.80451	down	-1.68454	-0.752356	1.68454	down	-2.15956	-1.11074	2.15956	down	-1.7057	-0.770365	1.7057	down	-2.25099	-1.17056	2.25099	down	-2.56978	-1.36165	2.56978	down		51601	Hs.719172	gb:NM_015929.1 /DB_XREF=gi:7706251 /GEN=LOC51601 /FEA=FLmRNA /CNT=35 /TID=Hs.112356.0 /TIER=FL+Stack /STK=11 /UG=Hs.112356 /LL=51601 /DEF=Homo sapiens lipoyltransferase (LOC51601), mRNA. /PROD=lipoyltransferase /FL=gb:NM_015929.1 gb:AB017566.1
PP7080///SLC9A3	1.52803e-11	5.78512e-14	-1.47775	-0.563398	1.47775	down	-1.61615	-0.692557	1.61615	down	-1.5542	-0.636176	1.5542	down	-1.68515	-0.752875	1.68515	down	-1.56028	-0.641809	1.56028	down	-1.75997	-0.815549	1.75997	down	-1.9515	-0.964584	1.9515	down		6550///25845	Hs.719132	gb:BF528646 /DB_XREF=gi:11616009 /DB_XREF=602041279F1 /CLONE=IMAGE:4179258 /FEA=mRNA /CNT=92 /TID=Hs.107614.0 /TIER=Stack /STK=8 /UG=Hs.107614 /LL=25845 /UG_GENE=DKFZP564I1171 /UG_TITLE=DKFZP564I1171 protein
NELL2	1.57248e-11	5.98216e-14	-3.23572	-1.69409	3.23572	down	-2.09858	-1.06941	2.09858	down	-2.21781	-1.14914	2.21781	down	-3.23454	-1.69356	3.23454	down	-2.11222	-1.07876	2.11222	down	-3.98604	-1.99496	3.98604	down	-3.65967	-1.87171	3.65967	down		4753	Hs.505326	gb:NM_006159.1 /DB_XREF=gi:5453765 /GEN=NELL2 /FEA=FLmRNA /CNT=141 /TID=Hs.79389.0 /TIER=FL+Stack /STK=32 /UG=Hs.79389 /LL=4753 /DEF=Homo sapiens nel (chicken)-like 2 (NELL2), mRNA. /PROD=nel (chicken)-like 2 /FL=gb:D83018.1 gb:NM_006159.1
FCAR	1.58079e-11	6.04272e-14	3.0954	1.63013	3.0954	up	2.55228	1.35179	2.55228	up	2.10505	1.07386	2.10505	up	2.94446	1.558	2.94446	up	2.06005	1.04268	2.06005	up	3.11504	1.63925	3.11504	up	3.28763	1.71705	3.28763	up		2204	Hs.659872	gb:U56237.1 /DB_XREF=gi:1326230 /FEA=FLmRNA /CNT=1 /TID=Hs.193122.2 /TIER=FL /STK=0 /UG=Hs.193122 /LL=2204 /UG_GENE=FCAR /DEF=Human Fc alpha receptor b deltaS2 mRNA, complete cds. /PROD=FcalphaRbdeltaS2 /FL=gb:U56237.1
CEP290	1.58395e-11	6.08375e-14	-1.57511	-0.655451	1.57511	down	-1.77799	-0.830249	1.77799	down	-1.42266	-0.50859	1.42266	down	-1.91928	-0.940564	1.91928	down	-1.43031	-0.516329	1.43031	down	-1.88272	-0.912821	1.88272	down	-1.96837	-0.977003	1.96837	down		80184	Hs.150444	gb:NM_014684.1 /DB_XREF=gi:7662079 /GEN=KIAA0373 /FEA=FLmRNA /CNT=32 /TID=Hs.150444.0 /TIER=FL+Stack /STK=10 /UG=Hs.150444 /LL=9707 /DEF=Homo sapiens KIAA0373 gene product (KIAA0373), mRNA. /PROD=KIAA0373 gene product /FL=gb:AB002371.1 gb:NM_014684.1
PDCD4	1.60991e-11	6.24238e-14	-2.09406	-1.0663	2.09406	down	-1.96361	-0.973508	1.96361	down	-1.88335	-0.913304	1.88335	down	-2.29565	-1.1989	2.29565	down	-1.78493	-0.835865	1.78493	down	-2.52691	-1.33737	2.52691	down	-2.72407	-1.44576	2.72407	down		27250	Hs.711490	gb:N92498 /DB_XREF=gi:1264807 /DB_XREF=zb28a04.s1 /CLONE=IMAGE:304878 /FEA=mRNA /CNT=121 /TID=Hs.326248.1 /TIER=Stack /STK=40 /UG=Hs.326248 /UG_TITLE=Homo sapiens cDNA: FLJ22071 fis, clone HEP11691
S1PR5	1.60991e-11	6.24003e-14	-2.1143	-1.08018	2.1143	down	-2.42499	-1.27798	2.42499	down	-2.23365	-1.1594	2.23365	down	-2.48034	-1.31054	2.48034	down	-2.4557	-1.29613	2.4557	down	-2.55473	-1.35317	2.55473	down	-2.90645	-1.53926	2.90645	down		53637	Hs.501561	gb:AI814092 /DB_XREF=gi:5425307 /DB_XREF=wk62f10.x1 /CLONE=IMAGE:2420011 /FEA=EST /CNT=16 /TID=Hs.46668.0 /TIER=Stack /STK=13 /UG=Hs.46668 /UG_TITLE=ESTs
RTN1	1.6234e-11	6.35404e-14	-1.85464	-0.891137	1.85464	down	-2.07743	-1.0548	2.07743	down	-1.89082	-0.919014	1.89082	down	-1.89511	-0.92228	1.89511	down	-2.3023	-1.20307	2.3023	down	-3.31324	-1.72824	3.31324	down	-3.2153	-1.68495	3.2153	down		6252	Hs.368626	gb:NM_021136.1 /DB_XREF=gi:10863934 /GEN=RTN1 /FEA=FLmRNA /CNT=183 /TID=Hs.99947.0 /TIER=FL+Stack /STK=47 /UG=Hs.99947 /LL=6252 /DEF=Homo sapiens reticulon 1 (RTN1), mRNA. /PROD=reticulon 1 /FL=gb:L10333.1 gb:L10334.1 gb:NM_021136.1
	1.6234e-11	6.35021e-14	-2.33148	-1.22124	2.33148	down	-3.21159	-1.68329	3.21159	down	-2.385	-1.25399	2.385	down	-3.43601	-1.78073	3.43601	down	-2.09932	-1.06992	2.09932	down	-4.75905	-2.25068	4.75905	down	-4.63471	-2.21248	4.63471	down			Hs.714856	gb:AI700476 /DB_XREF=gi:4988376 /DB_XREF=wd14d08.x1 /CLONE=IMAGE:2328111 /FEA=EST /CNT=45 /TID=Hs.32793.0 /TIER=Stack /STK=27 /UG=Hs.32793 /UG_TITLE=ESTs
CCR6	1.63788e-11	6.44067e-14	-1.89044	-0.918722	1.89044	down	-1.78484	-0.835797	1.78484	down	-1.83196	-0.873391	1.83196	down	-1.90288	-0.928182	1.90288	down	-1.61285	-0.68961	1.61285	down	-2.75822	-1.46374	2.75822	down	-2.67866	-1.42151	2.67866	down		1235	Hs.46468	gb:NM_004367.1 /DB_XREF=gi:4757939 /GEN=CCR6 /FEA=FLmRNA /CNT=14 /TID=Hs.46468.0 /TIER=FL /STK=1 /UG=Hs.46468 /LL=1235 /DEF=Homo sapiens chemokine (C-C motif) receptor 6 (CCR6), mRNA. /PROD=chemokine (C-C motif) receptor 6 /FL=gb:U68030.1 gb:U60000.1 gb:NM_004367.1
	1.7506e-11	6.91593e-14	3.45856	1.79017	3.45856	up	4.3066	2.10655	4.3066	up	3.29093	1.7185	3.29093	up	4.45341	2.15491	4.45341	up	2.97792	1.57431	2.97792	up	3.51165	1.81215	3.51165	up	4.13584	2.04818	4.13584	up			Hs.662175	gb:AK025534.1 /DB_XREF=gi:10438079 /FEA=mRNA /CNT=4 /TID=Hs.258010.0 /TIER=ConsEnd /STK=2 /UG=Hs.258010 /UG_TITLE=Homo sapiens cDNA: FLJ21881 fis, clone HEP02746 /DEF=Homo sapiens cDNA: FLJ21881 fis, clone HEP02746.
HIST2H2AA3///HIST2H2AA4	1.88092e-11	7.46519e-14	2.63875	1.39986	2.63875	up	3.60759	1.85104	3.60759	up	2.46314	1.3005	2.46314	up	3.15723	1.65866	3.15723	up	2.7826	1.47643	2.7826	up	3.26537	1.70725	3.26537	up	3.41972	1.77388	3.41972	up		8337///723790	Hs.530461///Hs.745563	gb:NM_003516.1 /DB_XREF=gi:4504250 /GEN=H2AFO /FEA=FLmRNA /CNT=109 /TID=Hs.795.0 /TIER=FL+Stack /STK=70 /UG=Hs.795 /LL=8337 /DEF=Homo sapiens H2A histone family, member O (H2AFO), mRNA. /PROD=H2A histone family, member O /FL=gb:L19779.1 gb:NM_003516.1 gb:BC001629.1
BCLAF1	1.97287e-11	7.86623e-14	-1.56995	-0.650719	1.56995	down	-1.99677	-0.997669	1.99677	down	-1.35567	-0.439007	1.35567	down	-1.89213	-0.920014	1.89213	down	-1.44408	-0.530154	1.44408	down	-2.27492	-1.18582	2.27492	down	-2.22914	-1.15649	2.22914	down		9774	Hs.486542	gb:AV717336 /DB_XREF=gi:10814488 /DB_XREF=AV717336 /CLONE=DCBBXC06 /FEA=EST /CNT=14 /TID=Hs.92448.0 /TIER=Stack /STK=9 /UG=Hs.92448 /UG_TITLE=ESTs
FNDC3B	1.97449e-11	7.90879e-14	3.13233	1.64724	3.13233	up	3.62468	1.85785	3.62468	up	2.63187	1.39609	2.63187	up	3.19102	1.67402	3.19102	up	2.38026	1.25112	2.38026	up	3.60532	1.85013	3.60532	up	3.35604	1.74676	3.35604	up		64778	Hs.744888	gb:BF444916 /DB_XREF=gi:11510054 /DB_XREF=nad19a09.x1 /CLONE=IMAGE:3365681 /FEA=FLmRNA /CNT=82 /TID=Hs.299883.0 /TIER=Stack /STK=13 /UG=Hs.299883 /LL=64778 /UG_GENE=FLJ23399 /UG_TITLE=hypothetical protein FLJ23399 /FL=gb:NM_022763.1
CA4	2.25971e-11	9.09257e-14	2.57101	1.36233	2.57101	up	2.18701	1.12896	2.18701	up	1.65411	0.726053	1.65411	up	2.81053	1.49084	2.81053	up	2.22903	1.15641	2.22903	up	3.70439	1.88924	3.70439	up	3.68727	1.88255	3.68727	up		762	Hs.89485	gb:NM_000717.2 /DB_XREF=gi:9951925 /GEN=CA4 /FEA=FLmRNA /CNT=16 /TID=Hs.89485.0 /TIER=FL+Stack /STK=9 /UG=Hs.89485 /LL=762 /DEF=Homo sapiens carbonic anhydrase IV (CA4), mRNA. /PROD=carbonic anhydrase IV precursor /FL=gb:NM_000717.2 gb:M83670.1
LILRA6///LILRB2///LILRB3///LOC102725015///LOC102725029///LOC102725031///LOC102725034///LOC102725035	2.30161e-11	9.30326e-14	1.53606	0.619231	1.53606	up	1.7251	0.786679	1.7251	up	1.5015	0.586407	1.5015	up	1.87544	0.90723	1.87544	up	1.486	0.571432	1.486	up	2.06056	1.04303	2.06056	up	2.36873	1.24411	2.36873	up		10288///11025///79168///102725015///102725029///102725031///102725034///102725035	Hs.631592///Hs.688335	gb:AF009643.1 /DB_XREF=gi:2662445 /FEA=FLmRNA /CNT=1 /TID=Hs.105928.1 /TIER=FL /STK=0 /UG=Hs.105928 /LL=11025 /UG_GENE=LILRB3 /DEF=Homo sapiens clone 6 immunoglobulin-like transcript 5 protein mRNA, complete cds. /PROD=immunoglobulin-like transcript 5 protein /FL=gb:AF009643.1
SYNCRIP	2.33395e-11	9.47666e-14	-2.14386	-1.10021	2.14386	down	-2.35637	-1.23657	2.35637	down	-1.92319	-0.9435	1.92319	down	-2.75507	-1.46209	2.75507	down	-2.07962	-1.05632	2.07962	down	-2.94247	-1.55703	2.94247	down	-3.10542	-1.63479	3.10542	down		10492	Hs.571177	gb:AL520908 /DB_XREF=gi:12784401 /DB_XREF=AL520908 /CLONE=CS0DB002YF01 (3 prime) /FEA=FLmRNA /CNT=236 /TID=Hs.155489.0 /TIER=Stack /STK=28 /UG=Hs.155489 /LL=10492 /UG_GENE=NSAP1 /UG_TITLE=NS1-associated protein 1 /FL=gb:NM_006372.1 gb:AF155568.1
SH3YL1	2.34214e-11	9.57999e-14	-3.08146	-1.62362	3.08146	down	-3.82322	-1.93479	3.82322	down	-2.38345	-1.25305	2.38345	down	-3.89454	-1.96145	3.89454	down	-2.49632	-1.3198	2.49632	down	-4.39138	-2.13467	4.39138	down	-4.73515	-2.24341	4.73515	down		26751	Hs.515951	gb:NM_015677.1 /DB_XREF=gi:7661669 /GEN=DKFZP586F1318 /FEA=FLmRNA /CNT=71 /TID=Hs.25213.0 /TIER=FL+Stack /STK=50 /UG=Hs.25213 /LL=26751 /DEF=Homo sapiens hypothetical protein (DKFZP586F1318), mRNA. /PROD=hypothetical protein /FL=gb:NM_015677.1
PDGFD	2.34214e-11	9.59558e-14	-1.75937	-0.815058	1.75937	down	-2.16483	-1.11425	2.16483	down	-2.2441	-1.16614	2.2441	down	-2.54593	-1.34819	2.54593	down	-2.33631	-1.22423	2.33631	down	-2.2856	-1.19257	2.2856	down	-2.68736	-1.42619	2.68736	down		80310	Hs.352298	gb:NM_025208.1 /DB_XREF=gi:13376807 /GEN=SCDGF-B /FEA=FLmRNA /CNT=65 /TID=Hs.112885.0 /TIER=FL+Stack /STK=29 /UG=Hs.112885 /LL=80310 /DEF=Homo sapiens spinal cord-derived growth factor-B (SCDGF-B), mRNA. /PROD=spinal cord-derived growth factor-B /FL=gb:AY027517.1 gb:NM_025208.1 gb:AB033832.1 gb:AF113216.1
PTPN4	2.35901e-11	9.70787e-14	-2.34931	-1.23224	2.34931	down	-2.25506	-1.17317	2.25506	down	-2.0089	-1.00641	2.0089	down	-2.85795	-1.51498	2.85795	down	-2.03027	-1.02167	2.03027	down	-2.83703	-1.50438	2.83703	down	-2.80029	-1.48558	2.80029	down		5775	Hs.469809	gb:AI379691 /DB_XREF=gi:4189544 /DB_XREF=tc60c06.x1 /CLONE=IMAGE:2069002 /FEA=EST /CNT=14 /TID=Hs.145934.0 /TIER=Stack /STK=8 /UG=Hs.145934 /UG_TITLE=ESTs
CYP1B1	2.46611e-11	1.01937e-13	5.49571	2.45831	5.49571	up	7.5801	2.92222	7.5801	up	4.6939	2.23079	4.6939	up	5.77284	2.52928	5.77284	up	3.51789	1.81471	3.51789	up	6.2514	2.64418	6.2514	up	6.74096	2.75295	6.74096	up		1545	Hs.154654	gb:AU154504 /DB_XREF=gi:11016025 /DB_XREF=AU154504 /CLONE=NT2RP4001328 /FEA=FLmRNA /CNT=212 /TID=Hs.154654.0 /TIER=Stack /STK=20 /UG=Hs.154654 /LL=1545 /UG_GENE=CYP1B1 /UG_TITLE=cytochrome P450, subfamily I (dioxin-inducible), polypeptide 1 (glaucoma 3, primary infantile) /FL=gb:U03688.1 gb:NM_000104.2
LOC101928429	2.51032e-11	1.04224e-13	3.38292	1.75827	3.38292	up	3.18296	1.67037	3.18296	up	3.00696	1.58831	3.00696	up	3.7591	1.91039	3.7591	up	2.25399	1.17248	2.25399	up	3.83774	1.94026	3.83774	up	3.28794	1.71719	3.28794	up		101928429		gb:AW500340 /DB_XREF=gi:7112861 /DB_XREF=UI-HF-BN0-akg-g-06-0-UI.r1 /CLONE=IMAGE:3077171 /FEA=EST /CNT=6 /TID=Hs.313876.0 /TIER=ConsEnd /STK=0 /UG=Hs.313876 /UG_TITLE=ESTs
ACSL1	2.74651e-11	1.14532e-13	4.78313	2.25796	4.78313	up	3.03668	1.60249	3.03668	up	3.27829	1.71294	3.27829	up	4.78918	2.25978	4.78918	up	3.16131	1.66052	3.16131	up	4.58638	2.19736	4.58638	up	3.88956	1.95961	3.88956	up		2180	Hs.406678	gb:NM_001995.1 /DB_XREF=gi:4503650 /GEN=FACL1 /FEA=FLmRNA /CNT=5 /TID=Hs.278333.0 /TIER=FL /STK=0 /UG=Hs.278333 /LL=2179 /DEF=Homo sapiens fatty-acid-Coenzyme A ligase, long-chain 1 (FACL1), nuclear gene encoding mitochondrial protein, mRNA. /PROD=long-chain fatty-acid-coenzyme A ligase 1 /FL=gb:NM_001995.1 gb:L09229.1
PAQR8	2.79177e-11	1.1693e-13	-1.64274	-0.716105	1.64274	down	-1.34257	-0.424998	1.34257	down	-1.45096	-0.537004	1.45096	down	-1.78974	-0.839754	1.78974	down	-1.48455	-0.570023	1.48455	down	-1.75941	-0.815089	1.75941	down	-1.77369	-0.826754	1.77369	down		85315	Hs.239388	gb:AW006774 /DB_XREF=gi:5855552 /DB_XREF=wt07c04.x1 /CLONE=IMAGE:2506758 /FEA=DNA_1 /CNT=68 /TID=Hs.239388.1 /TIER=Stack /STK=19 /UG=Hs.239388 /UG_TITLE=Human DNA sequence from clone RP1-304B14 on chromosome 6. Contains a gene for a novel protein and a part of a gene for a novel protein with two isoforms. Contains ESTs, STSs, GSSs and a CpG island
NCR3	2.81721e-11	1.18511e-13	-1.73901	-0.798266	1.73901	down	-1.60677	-0.684162	1.60677	down	-1.68726	-0.75468	1.68726	down	-1.89009	-0.918454	1.89009	down	-1.67017	-0.739994	1.67017	down	-1.86407	-0.89846	1.86407	down	-1.80274	-0.850194	1.80274	down		259197	Hs.509513	gb:AF031136.1 /DB_XREF=gi:2623872 /FEA=FLmRNA /CNT=2 /TID=Hs.88411.4 /TIER=FL /STK=0 /UG=Hs.88411 /LL=7940 /UG_GENE=LY117 /DEF=Homo sapiens 1C7 precursor, mRNA, alternatively spliced, complete cds. /PROD=1C7 precursor /FL=gb:AF031136.1
CPEB4	2.8932e-11	1.22237e-13	3.76336	1.91202	3.76336	up	5.61834	2.49014	5.61834	up	5.19017	2.37578	5.19017	up	4.14595	2.0517	4.14595	up	2.53623	1.34268	2.53623	up	4.94721	2.30661	4.94721	up	5.47734	2.45347	5.47734	up		80315	Hs.127126	gb:AV704132 /DB_XREF=gi:10721452 /DB_XREF=AV704132 /CLONE=ADBCXE06 /FEA=mRNA /CNT=144 /TID=Hs.301444.0 /TIER=Stack /STK=13 /UG=Hs.301444 /LL=80315 /UG_GENE=KIAA1673 /UG_TITLE=KIAA1673
IL10	2.89832e-11	1.23204e-13	1.70512	0.769871	1.70512	up	1.58003	0.659947	1.58003	up	1.31727	0.397548	1.31727	up	1.56609	0.647168	1.56609	up	1.34283	0.425274	1.34283	up	1.83502	0.875793	1.83502	up	1.59381	0.67248	1.59381	up		3586	Hs.193717	gb:NM_000572.1 /DB_XREF=gi:10835140 /GEN=IL10 /FEA=FLmRNA /CNT=6 /TID=Hs.193717.0 /TIER=FL /STK=1 /UG=Hs.193717 /LL=3586 /DEF=Homo sapiens interleukin 10 (IL10), mRNA. /PROD=interleukin 10 /FL=gb:M57627.1 gb:NM_000572.1
TXN	2.89832e-11	1.23513e-13	2.60672	1.38223	2.60672	up	2.31398	1.21038	2.31398	up	2.3116	1.20889	2.3116	up	2.85872	1.51537	2.85872	up	3.21312	1.68397	3.21312	up	3.67401	1.87736	3.67401	up	3.06838	1.61748	3.06838	up		7295	Hs.435136	gb:AF313911.1 /DB_XREF=gi:11345419 /FEA=FLmRNA /CNT=320 /TID=Hs.76136.0 /TIER=FL /STK=0 /UG=Hs.76136 /LL=7295 /UG_GENE=TXN /DEF=Homo sapiens thioredoxin mRNA, complete cds. /PROD=thioredoxin /FL=gb:NM_003329.1 gb:J04026.1 gb:AF313911.1 gb:AF276919.1 gb:AY004872.1 gb:BC003377.1
ABHD15	3.31137e-11	1.41721e-13	-1.52549	-0.609271	1.52549	down	-1.80503	-0.852024	1.80503	down	-1.6303	-0.705142	1.6303	down	-1.72287	-0.784811	1.72287	down	-1.4471	-0.533162	1.4471	down	-1.77088	-0.824465	1.77088	down	-1.88033	-0.910989	1.88033	down		116236	Hs.106510	gb:AI817418 /DB_XREF=gi:5436497 /DB_XREF=wk38b02.x1 /CLONE=IMAGE:2417643 /FEA=EST /CNT=36 /TID=Hs.106510.0 /TIER=Stack /STK=9 /UG=Hs.106510 /UG_TITLE=ESTs, Moderately similar to ALU2_HUMAN ALU SUBFAMILY SB SEQUENCE CONTAMINATION WARNING ENTRY (H.sapiens)
HIP1	3.50593e-11	1.50689e-13	2.95874	1.56498	2.95874	up	1.36145	0.44514	1.36145	up	1.62574	0.701097	1.62574	up	2.37281	1.2466	2.37281	up	1.86588	0.899854	1.86588	up	3.67859	1.87915	3.67859	up	2.92092	1.54642	2.92092	up		3092	Hs.329266	gb:AU145049 /DB_XREF=gi:11006570 /DB_XREF=AU145049 /CLONE=HEMBA1003741 /FEA=EST /CNT=51 /TID=Hs.38489.0 /TIER=Stack /STK=28 /UG=Hs.38489 /UG_TITLE=ESTs
MCTP2	3.60834e-11	1.55751e-13	3.77789	1.91758	3.77789	up	1.86457	0.898841	1.86457	up	2.03526	1.02521	2.03526	up	3.03613	1.60223	3.03613	up	2.12163	1.08517	2.12163	up	3.25562	1.70293	3.25562	up	2.77826	1.47418	2.77826	up		55784	Hs.33368	gb:AI052257 /DB_XREF=gi:3308248 /DB_XREF=oz21d04.x1 /CLONE=IMAGE:1675975 /FEA=mRNA /CNT=22 /TID=Hs.50742.0 /TIER=Stack /STK=10 /UG=Hs.50742 /UG_TITLE=Homo sapiens cDNA: FLJ23331 fis, clone HEP12664
PCDH9	3.67351e-11	1.59236e-13	-1.65267	-0.724801	1.65267	down	-3.00007	-1.585	3.00007	down	-2.16938	-1.11729	2.16938	down	-2.54702	-1.34881	2.54702	down	-2.16191	-1.1123	2.16191	down	-3.24608	-1.6987	3.24608	down	-3.39875	-1.765	3.39875	down		5101		gb:R49295 /DB_XREF=gi:819534 /DB_XREF=yg59e04.s1 /CLONE=IMAGE:36842 /FEA=EST /CNT=7 /TID=Hs.24886.0 /TIER=ConsEnd /STK=3 /UG=Hs.24886 /UG_TITLE=ESTs
MEF2C	3.83232e-11	1.66821e-13	-1.91026	-0.933768	1.91026	down	-1.87088	-0.903715	1.87088	down	-1.7016	-0.766889	1.7016	down	-2.10708	-1.07524	2.10708	down	-1.69654	-0.762599	1.69654	down	-3.12931	-1.64584	3.12931	down	-2.80615	-1.48859	2.80615	down		4208	Hs.649965	gb:AL536517 /DB_XREF=gi:12800010 /DB_XREF=AL536517 /CLONE=CS0DF038YH13 (5 prime) /FEA=FLmRNA /CNT=240 /TID=Hs.78995.1 /TIER=Stack /STK=53 /UG=Hs.78995 /LL=4208 /UG_GENE=MEF2C /UG_TITLE=MADS box transcription enhancer factor 2, polypeptide C (myocyte enhancer factor 2C) /FL=gb:L08895.1
ITGA4	3.88857e-11	1.69981e-13	-2.25756	-1.17476	2.25756	down	-1.96396	-0.973765	1.96396	down	-1.86832	-0.901744	1.86832	down	-2.66134	-1.41215	2.66134	down	-1.96007	-0.970903	1.96007	down	-3.13959	-1.65057	3.13959	down	-3.3715	-1.75339	3.3715	down		3676	Hs.440955	gb:AI936034 /DB_XREF=gi:5674904 /DB_XREF=wo47c10.x1 /CLONE=IMAGE:2458482 /FEA=EST /CNT=3 /TID=Hs.43936.0 /TIER=ConsEnd /STK=3 /UG=Hs.43936 /UG_TITLE=ESTs
GAS7	3.93679e-11	1.72808e-13	2.63325	1.39684	2.63325	up	2.60362	1.38052	2.60362	up	2.55583	1.35379	2.55583	up	3.51172	1.81218	3.51172	up	2.55096	1.35104	2.55096	up	3.07615	1.62112	3.07615	up	3.65773	1.87095	3.65773	up		8522	Hs.462214	gb:BE439987 /DB_XREF=gi:9439470 /DB_XREF=HTM1-745F /FEA=FLmRNA /CNT=244 /TID=Hs.226133.0 /TIER=Stack /STK=21 /UG=Hs.226133 /LL=8522 /UG_GENE=GAS7 /UG_TITLE=growth arrest-specific 7 /FL=gb:AB007854.1 gb:NM_005890.1
ST3GAL4-AS1	4.01586e-11	1.77013e-13	4.43869	2.15014	4.43869	up	3.96057	1.98571	3.96057	up	3.30194	1.72331	3.30194	up	4.8265	2.27098	4.8265	up	3.37916	1.75666	3.37916	up	5.2342	2.38797	5.2342	up	5.86236	2.55148	5.86236	up		399972	Hs.585206	gb:BF343672 /DB_XREF=gi:11290855 /DB_XREF=602015325F1 /CLONE=IMAGE:4150927 /FEA=EST /CNT=23 /TID=Hs.22590.1 /TIER=Stack /STK=9 /UG=Hs.22590 /UG_TITLE=ESTs
ADM	4.28247e-11	1.89549e-13	3.75492	1.90878	3.75492	up	3.37644	1.7555	3.37644	up	3.05116	1.60936	3.05116	up	4.4249	2.14564	4.4249	up	3.21298	1.68391	3.21298	up	4.4021	2.13819	4.4021	up	4.64521	2.21574	4.64521	up		133	Hs.441047	gb:NM_001124.1 /DB_XREF=gi:4501944 /GEN=ADM /FEA=FLmRNA /CNT=170 /TID=Hs.394.0 /TIER=FL+Stack /STK=73 /UG=Hs.394 /LL=133 /DEF=Homo sapiens adrenomedullin (ADM), mRNA. /PROD=adrenomedullin /FL=gb:NM_001124.1 gb:D14874.1
ZAK	4.40077e-11	1.96395e-13	3.4279	1.77732	3.4279	up	3.80861	1.92927	3.80861	up	2.94205	1.55682	2.94205	up	3.66217	1.8727	3.66217	up	2.8603	1.51617	2.8603	up	3.65178	1.8686	3.65178	up	3.47548	1.79721	3.47548	up		51776	Hs.444451	gb:AW069181 /DB_XREF=gi:6024267 /DB_XREF=cr43e01.x1 /CLONE=HBMSC_cr43e01 /FEA=FLmRNA /CNT=38 /TID=Hs.115175.1 /TIER=Stack /STK=11 /UG=Hs.115175 /LL=51776 /UG_GENE=ZAK /UG_TITLE=sterile-alpha motif and leucine zipper containing kinase AZK /FL=gb:BC001401.1 gb:AB049734.1
SLC51A	4.40077e-11	1.96029e-13	2.73709	1.45264	2.73709	up	1.54276	0.625513	1.54276	up	1.22887	0.297333	1.22887	up	1.7882	0.838505	1.7882	up	1.23533	0.304893	1.23533	up	2.97423	1.57251	2.97423	up	2.09289	1.0655	2.09289	up		200931	Hs.630585	gb:AA702685 /DB_XREF=gi:2705798 /DB_XREF=zi90f05.s1 /CLONE=IMAGE:448065 /FEA=EST /CNT=24 /TID=Hs.18963.0 /TIER=Stack /STK=14 /UG=Hs.18963 /UG_TITLE=ESTs
GGT1///GGT2///GGTLC1///GGTLC2///LOC102724197	4.4694e-11	2.00275e-13	1.32457	0.405521	1.32457	up	1.0973	0.133958	1.0973	up	1.25431	0.32689	1.25431	up	1.39818	0.483547	1.39818	up	1.2625	0.336279	1.2625	up	1.59412	0.672764	1.59412	up	1.67398	0.743283	1.67398	up		2678///91227///92086///728441///102724197	Hs.632765///Hs.645535	gb:L20490.1 /DB_XREF=gi:306748 /FEA=FLmRNA /CNT=42 /TID=Hs.284380.4 /TIER=FL /STK=3 /UG=Hs.284380 /LL=2678 /UG_GENE=GGT1 /DEF=Human gamma-glutamyl transpeptidase mRNA, complete cds. /PROD=gamma-glutamyl transpeptidase /FL=gb:L20490.1 gb:J05235.1
SERPINB1	4.49226e-11	2.02121e-13	2.86722	1.51965	2.86722	up	3.45568	1.78897	3.45568	up	2.22248	1.15217	2.22248	up	2.80194	1.48643	2.80194	up	1.5927	0.671478	1.5927	up	3.06751	1.61707	3.06751	up	2.50165	1.32288	2.50165	up		1992	Hs.381167	gb:W52010 /DB_XREF=gi:1349734 /DB_XREF=zc92g12.r1 /CLONE=IMAGE:338662 /FEA=EST /CNT=9 /TID=Hs.191379.0 /TIER=ConsEnd /STK=0 /UG=Hs.191379 /UG_TITLE=ESTs
TGFBR3	4.59433e-11	2.07554e-13	-2.92146	-1.54669	2.92146	down	-2.8808	-1.52647	2.8808	down	-2.79246	-1.48154	2.79246	down	-3.74676	-1.90564	3.74676	down	-2.68877	-1.42695	2.68877	down	-3.71156	-1.89203	3.71156	down	-4.17375	-2.06134	4.17375	down		7049	Hs.482390	gb:AW193698 /DB_XREF=gi:6472397 /DB_XREF=xm29e06.x1 /CLONE=IMAGE:2685634 /FEA=EST /CNT=51 /TID=Hs.79059.1 /TIER=Stack /STK=29 /UG=Hs.79059 /LL=7049 /UG_GENE=TGFBR3 /UG_TITLE=transforming growth factor, beta receptor III (betaglycan, 300kD)
MAPK14	4.64714e-11	2.11251e-13	3.85611	1.94715	3.85611	up	3.06772	1.61717	3.06772	up	2.95688	1.56408	2.95688	up	4.73607	2.24369	4.73607	up	3.04731	1.60754	3.04731	up	4.25244	2.08829	4.25244	up	4.29978	2.10426	4.29978	up		1432	Hs.485233	gb:AF100544.1 /DB_XREF=gi:7109716 /GEN=CSBP /FEA=FLmRNA /CNT=9 /TID=Hs.79107.1 /TIER=FL /STK=0 /UG=Hs.79107 /LL=1432 /DEF=Homo sapiens stress-activated protein kinase 2a (CSBP) mRNA, complete cds. /PROD=stress-activated protein kinase 2a /FL=gb:L35264.1 gb:BC000092.1 gb:AF100544.1
	4.64714e-11	2.11639e-13	-1.77742	-0.829785	1.77742	down	-1.66521	-0.735702	1.66521	down	-1.55422	-0.63619	1.55422	down	-2.00495	-1.00357	2.00495	down	-1.69684	-0.762847	1.69684	down	-1.94096	-0.956774	1.94096	down	-2.21154	-1.14505	2.21154	down			Hs.477134	gb:BF197274 /DB_XREF=gi:11086183 /DB_XREF=hr78a02.x1 /CLONE=IMAGE:3134570 /FEA=EST /CNT=26 /TID=Hs.78277.0 /TIER=Stack /STK=12 /UG=Hs.78277 /LL=25871 /UG_GENE=DKFZP434F2021 /UG_TITLE=DKFZP434F2021 protein
FAM20A	4.66462e-11	2.13289e-13	2.48103	1.31094	2.48103	up	3.08518	1.62535	3.08518	up	1.99894	0.999232	1.99894	up	2.51109	1.32832	2.51109	up	1.87062	0.903517	1.87062	up	4.10601	2.03774	4.10601	up	5.42918	2.44073	5.42918	up		54757	Hs.268874	gb:AI860568 /DB_XREF=gi:5514184 /DB_XREF=wl14f03.x1 /CLONE=IMAGE:2424893 /FEA=EST /CNT=5 /TID=Hs.310913.0 /TIER=ConsEnd /STK=1 /UG=Hs.310913 /UG_TITLE=ESTs
NLRP1	4.77742e-11	2.1932e-13	-1.424	-0.50995	1.424	down	-1.42921	-0.515223	1.42921	down	-1.24077	-0.311233	1.24077	down	-1.38161	-0.466353	1.38161	down	-1.37778	-0.462346	1.37778	down	-1.86609	-0.900022	1.86609	down	-1.51254	-0.596977	1.51254	down		22861	Hs.652273	gb:AF229061.1 /DB_XREF=gi:12656108 /GEN=NAC /FEA=FLmRNA /CNT=1 /TID=Hs.104305.2 /TIER=FL /STK=0 /UG=Hs.104305 /LL=22861 /DEF=Homo sapiens NAC-gamma splice variant (NAC) mRNA, complete cds, alternatively spliced. /PROD=NAC-gamma splice variant /FL=gb:AF229061.1
SERPINB1	5.18172e-11	2.38828e-13	3.41616	1.77238	3.41616	up	2.44964	1.29257	2.44964	up	2.16051	1.11137	2.16051	up	2.90821	1.54013	2.90821	up	2.14618	1.10177	2.14618	up	3.8472	1.94381	3.8472	up	3.03744	1.60285	3.03744	up		1992	Hs.381167	gb:AW512196 /DB_XREF=gi:7150274 /DB_XREF=xx71e04.x1 /CLONE=IMAGE:2849118 /FEA=EST /CNT=15 /TID=Hs.234392.2 /TIER=Stack /STK=10 /UG=Hs.234392 /LL=5051 /UG_GENE=PAFAH2 /UG_TITLE=platelet-activating factor acetylhydrolase 2 (40kD)
LILRA6///LILRB2///LILRB3///LOC102725015///LOC102725029///LOC102725031///LOC102725034///LOC102725035	5.20911e-11	2.41043e-13	1.59481	0.67338	1.59481	up	1.71758	0.780377	1.71758	up	1.55291	0.634972	1.55291	up	2.05694	1.0405	2.05694	up	1.57619	0.656438	1.57619	up	2.12562	1.08788	2.12562	up	2.46405	1.30103	2.46405	up		10288///11025///79168///102725015///102725029///102725031///102725034///102725035	Hs.631592///Hs.688335	gb:AF009634.1 /DB_XREF=gi:2662427 /FEA=FLmRNA /CNT=4 /TID=Hs.105928.2 /TIER=FL /STK=0 /UG=Hs.105928 /LL=11025 /UG_GENE=LILRB3 /DEF=Homo sapiens clone 17.6 immunoglobulin-like transcript 5 protein mRNA, complete cds. /PROD=immunoglobulin-like transcript 5 protein /FL=gb:AF009634.1 gb:AF009640.1 gb:AF009636.1
ZNF677	5.44567e-11	2.52986e-13	-1.52939	-0.612958	1.52939	down	-2.15172	-1.10549	2.15172	down	-1.60657	-0.683979	1.60657	down	-1.94875	-0.962551	1.94875	down	-1.61772	-0.693965	1.61772	down	-1.95225	-0.965136	1.95225	down	-1.97854	-0.984436	1.97854	down		342926	Hs.660933	gb:AI816281 /DB_XREF=gi:5431827 /DB_XREF=au46e06.x1 /CLONE=IMAGE:2517826 /FEA=EST /CNT=21 /TID=Hs.293690.0 /TIER=Stack /STK=12 /UG=Hs.293690 /UG_TITLE=ESTs
PRKACB	5.47469e-11	2.55335e-13	-2.99007	-1.58018	2.99007	down	-2.53783	-1.3436	2.53783	down	-2.41423	-1.27156	2.41423	down	-3.24183	-1.69681	3.24183	down	-2.45327	-1.29471	2.45327	down	-3.66058	-1.87207	3.66058	down	-3.86715	-1.95127	3.86715	down		5567	Hs.487325	gb:AA130247 /DB_XREF=gi:1691251 /DB_XREF=zl38g12.s1 /CLONE=IMAGE:504262 /FEA=FLmRNA /CNT=147 /TID=Hs.87773.0 /TIER=Stack /STK=69 /UG=Hs.87773 /LL=5567 /UG_GENE=PRKACB /UG_TITLE=protein kinase, cAMP-dependent, catalytic, beta /FL=gb:M34181.1 gb:NM_002731.1
LINC00954	5.60675e-11	2.6252e-13	-1.66546	-0.735918	1.66546	down	-1.43545	-0.521505	1.43545	down	-1.67139	-0.741049	1.67139	down	-1.74884	-0.806401	1.74884	down	-1.45336	-0.539392	1.45336	down	-2.14489	-1.1009	2.14489	down	-1.99905	-0.999317	1.99905	down		400946	Hs.289062	gb:AK022396.1 /DB_XREF=gi:10433782 /FEA=mRNA /CNT=7 /TID=Hs.289062.0 /TIER=ConsEnd /STK=0 /UG=Hs.289062 /UG_TITLE=Homo sapiens cDNA FLJ12334 fis, clone MAMMA1002209 /DEF=Homo sapiens cDNA FLJ12334 fis, clone MAMMA1002209.
AKAP11	5.61184e-11	2.64811e-13	-2.15136	-1.10525	2.15136	down	-2.54002	-1.34484	2.54002	down	-1.88865	-0.917357	1.88865	down	-2.56069	-1.35653	2.56069	down	-2.01941	-1.01393	2.01941	down	-3.06442	-1.61562	3.06442	down	-3.37519	-1.75497	3.37519	down		11215	Hs.105105	gb:NM_016248.1 /DB_XREF=gi:7706456 /GEN=LOC51707 /FEA=FLmRNA /CNT=106 /TID=Hs.232076.0 /TIER=FL+Stack /STK=34 /UG=Hs.232076 /LL=11215 /DEF=Homo sapiens A-kinase anchoring protein 220 (LOC51707), mRNA. /PROD=A-kinase anchoring protein 220 /FL=gb:NM_016248.1 gb:AF176555.1
KPNA5	5.61184e-11	2.64311e-13	-2.38648	-1.25489	2.38648	down	-3.16289	-1.66124	3.16289	down	-2.35303	-1.23452	2.35303	down	-3.07979	-1.62283	3.07979	down	-2.30743	-1.20629	2.30743	down	-3.49326	-1.80458	3.49326	down	-3.89277	-1.9608	3.89277	down		3841		gb:BG231980 /DB_XREF=gi:12727126 /DB_XREF=naf34h08.x1 /CLONE=IMAGE:4143206 /FEA=EST /CNT=14 /TID=Hs.32615.0 /TIER=Stack /STK=10 /UG=Hs.32615 /UG_TITLE=ESTs
QSOX1	6.01308e-11	2.84845e-13	1.66559	0.736032	1.66559	up	1.43238	0.518416	1.43238	up	1.38071	0.465414	1.38071	up	1.72292	0.784859	1.72292	up	1.43623	0.522285	1.43623	up	2.03569	1.02552	2.03569	up	2.0003	1.00022	2.0003	up		5768	Hs.744925	gb:NM_002826.2 /DB_XREF=gi:13325074 /GEN=QSCN6 /FEA=FLmRNA /CNT=242 /TID=Hs.77266.0 /TIER=FL+Stack /STK=97 /UG=Hs.77266 /LL=5768 /DEF=Homo sapiens quiescin Q6 (QSCN6), mRNA. /PROD=quiescin Q6 /FL=gb:U97276.2 gb:NM_002826.2 gb:L42379.1
FCGR1B	6.18096e-11	2.93927e-13	5.15898	2.36709	5.15898	up	5.36649	2.42398	5.36649	up	3.5361	1.82216	3.5361	up	6.05442	2.59799	6.05442	up	3.80097	1.92637	3.80097	up	6.31013	2.65767	6.31013	up	5.47753	2.45353	5.47753	up		2210	Hs.534956	gb:L03419.1 /DB_XREF=gi:182460 /FEA=FLmRNA /CNT=7 /TID=Hs.77424.1 /TIER=FL /STK=2 /UG=Hs.77424 /LL=2209 /UG_GENE=FCGR1A /DEF=Human Fc-gamma receptor I B1 mRNA, complete cds. /PROD=Fc gamma receptor I /FL=gb:L03420.1 gb:L03419.1
RAB40B	6.18606e-11	2.96433e-13	-1.48647	-0.571887	1.48647	down	-1.73306	-0.793318	1.73306	down	-1.33871	-0.420844	1.33871	down	-1.53222	-0.615622	1.53222	down	-1.33428	-0.416057	1.33428	down	-1.55344	-0.635464	1.55344	down	-1.56328	-0.644578	1.56328	down		10966	Hs.484068	gb:NM_006822.1 /DB_XREF=gi:5803162 /GEN=SEC4L /FEA=FLmRNA /CNT=77 /TID=Hs.302498.0 /TIER=FL+Stack /STK=18 /UG=Hs.302498 /LL=10966 /DEF=Homo sapiens GTP-binding protein homologous to Saccharomyces cerevisiae SEC4 (SEC4L), mRNA. /PROD=GTP-binding protein homologous to Saccharomycescerevisiae SEC4 /FL=gb:NM_006822.1 gb:U05227.1
IL2RB	6.18606e-11	2.9558e-13	-3.0008	-1.58535	3.0008	down	-2.75287	-1.46094	2.75287	down	-2.76177	-1.46559	2.76177	down	-3.18549	-1.67152	3.18549	down	-2.3636	-1.24099	2.3636	down	-3.26645	-1.70772	3.26645	down	-3.36944	-1.75251	3.36944	down		3560	Hs.474787	gb:NM_000878.1 /DB_XREF=gi:4504664 /GEN=IL2RB /FEA=FLmRNA /CNT=45 /TID=Hs.75596.0 /TIER=FL+Stack /STK=26 /UG=Hs.75596 /LL=3560 /DEF=Homo sapiens interleukin 2 receptor, beta (IL2RB), mRNA. /PROD=interleukin 2 receptor, beta /FL=gb:NM_000878.1 gb:M26062.1
	6.39287e-11	3.07512e-13	4.09436	2.03364	4.09436	up	5.35537	2.42099	5.35537	up	4.42348	2.14518	4.42348	up	4.36742	2.12678	4.36742	up	3.40993	1.76974	3.40993	up	4.63732	2.21329	4.63732	up	5.60048	2.48555	5.60048	up			Hs.638554	gb:AL834519.1 /DB_XREF=gi:21740334 /TID=Hs2.376781.1 /CNT=2 /FEA=mRNA /TIER=ConsEnd /STK=0 /UG=Hs.376781 /UG_TITLE=Homo sapiens mRNA; cDNA DKFZp434N0220 (from clone DKFZp434N0220) /DEF=Homo sapiens mRNA; cDNA DKFZp434N0220 (from clone DKFZp434N0220).
SGK223	6.76897e-11	3.26918e-13	-2.53867	-1.34407	2.53867	down	-2.25963	-1.17609	2.25963	down	-2.08566	-1.0605	2.08566	down	-2.30761	-1.2064	2.30761	down	-1.86533	-0.899428	1.86533	down	-3.05027	-1.60894	3.05027	down	-2.72447	-1.44598	2.72447	down		157285	Hs.657673	gb:BF739767 /DB_XREF=gi:12066443 /DB_XREF=hu59b11.x1 /CLONE=IMAGE:3174117 /FEA=EST /CNT=20 /TID=Hs.29068.0 /TIER=ConsEnd /STK=6 /UG=Hs.29068 /UG_TITLE=ESTs
DNAJC30	6.76897e-11	3.2808e-13	-1.58764	-0.666888	1.58764	down	-1.54969	-0.631977	1.54969	down	-1.49934	-0.584324	1.49934	down	-1.74345	-0.801948	1.74345	down	-1.56313	-0.644438	1.56313	down	-1.78361	-0.834799	1.78361	down	-1.85902	-0.894546	1.85902	down		84277	Hs.647046	gb:AL045816 /DB_XREF=gi:5433928 /DB_XREF=DKFZp434H196_s1 /CLONE=DKFZp434H196 /FEA=EST /CNT=9 /TID=Hs.153645.0 /TIER=ConsEnd /STK=1 /UG=Hs.153645 /UG_TITLE=ESTs
LRRN3	6.83425e-11	3.32494e-13	-5.17076	-2.37038	5.17076	down	-3.28255	-1.71482	3.28255	down	-3.64982	-1.86782	3.64982	down	-5.69699	-2.5102	5.69699	down	-3.68766	-1.88271	3.68766	down	-6.55168	-2.71187	6.55168	down	-5.31638	-2.41044	5.31638	down		54674	Hs.3781	gb:AL442092.1 /DB_XREF=gi:10241766 /GEN=DKFZp761K2424 /FEA=FLmRNA /CNT=66 /TID=Hs.3781.0 /TIER=FL+Stack /STK=11 /UG=Hs.3781 /LL=54674 /DEF=Homo sapiens mRNA; cDNA DKFZp761K2424 (from clone DKFZp761K2424); complete cds. /PROD=hypothetical protein /FL=gb:AL442092.1
ZNF91	6.92697e-11	3.38272e-13	-2.81759	-1.49446	2.81759	down	-2.31264	-1.20954	2.31264	down	-2.25417	-1.17259	2.25417	down	-3.00784	-1.58873	3.00784	down	-2.49895	-1.32132	2.49895	down	-3.35463	-1.74615	3.35463	down	-3.4629	-1.79198	3.4629	down		7644	Hs.654471	gb:NM_003430.1 /DB_XREF=gi:4508040 /GEN=ZNF91 /FEA=FLmRNA /CNT=24 /TID=Hs.8597.0 /TIER=FL /STK=3 /UG=Hs.8597 /LL=7644 /DEF=Homo sapiens zinc finger protein 91 (HPF7, HTF10) (ZNF91), mRNA. /PROD=zinc finger protein 91 (HPF7, HTF10) /FL=gb:L11672.1 gb:NM_003430.1
LOC101927121	6.93176e-11	3.39774e-13	-1.22747	-0.295689	1.22747	down	-1.21991	-0.286774	1.21991	down	-1.21979	-0.286632	1.21979	down	-1.26592	-0.340186	1.26592	down	-1.13438	-0.181899	1.13438	down	-1.27173	-0.346795	1.27173	down	-1.27257	-0.347741	1.27257	down		101927121	Hs.407014	gb:AI523241 /DB_XREF=gi:4437376 /DB_XREF=ar70f06.x1 /CLONE=IMAGE:2127971 /TID=Hs2.407014.1 /CNT=4 /FEA=mRNA /TIER=ConsEnd /STK=2 /UG=Hs.407014 /UG_TITLE=Homo sapiens cDNA FLJ37963 fis, clone CTONG2009689.
ZDHHC3	7.0359e-11	3.46165e-13	1.92002	0.941123	1.92002	up	1.55268	0.634757	1.55268	up	1.3854	0.470303	1.3854	up	1.77031	0.823999	1.77031	up	1.55571	0.637575	1.55571	up	2.19167	1.13203	2.19167	up	2.04827	1.03441	2.04827	up		51304	Hs.61430	gb:NM_016598.1 /DB_XREF=gi:7706132 /GEN=LOC51304 /FEA=FLmRNA /CNT=173 /TID=Hs.14896.0 /TIER=FL+Stack /STK=54 /UG=Hs.14896 /LL=51304 /DEF=Homo sapiens DHHC1 protein (LOC51304), mRNA. /PROD=DHHC1 protein /FL=gb:NM_016598.1 gb:AF247703.1
DHCR7	7.16361e-11	3.53759e-13	1.39019	0.47528	1.39019	up	1.13342	0.180683	1.13342	up	1.23974	0.310033	1.23974	up	1.42051	0.50641	1.42051	up	1.28947	0.366776	1.28947	up	1.82604	0.868722	1.82604	up	1.71282	0.77637	1.71282	up		1717	Hs.503134	gb:AW150953 /DB_XREF=gi:6198851 /DB_XREF=xg42f09.x1 /CLONE=IMAGE:2630249 /FEA=FLmRNA /CNT=239 /TID=Hs.11806.0 /TIER=Stack /STK=12 /UG=Hs.11806 /LL=1717 /UG_GENE=DHCR7 /UG_TITLE=7-dehydrocholesterol reductase /FL=gb:NM_001360.1 gb:AF034544.1 gb:BC000054.1 gb:AF096305.1 gb:AF067127.1
ZDHHC19	7.58012e-11	3.75713e-13	3.29457	1.72009	3.29457	up	2.11196	1.07858	2.11196	up	1.73923	0.798446	1.73923	up	3.12658	1.64459	3.12658	up	2.27257	1.18432	2.27257	up	5.63599	2.49467	5.63599	up	6.12198	2.614	6.12198	up		131540	Hs.111591	gb:AW014300 /DB_XREF=gi:5863057 /DB_XREF=UI-H-BI0p-aax-a-08-0-UI.s1 /CLONE=IMAGE:2710575 /FEA=EST /CNT=11 /TID=Hs.111591.0 /TIER=Stack /STK=11 /UG=Hs.111591 /UG_TITLE=ESTs
GADD45A	7.62303e-11	3.79235e-13	4.26948	2.09406	4.26948	up	1.49731	0.58237	1.49731	up	2.50874	1.32696	2.50874	up	3.73049	1.89937	3.73049	up	2.44774	1.29145	2.44774	up	4.47076	2.16052	4.47076	up	3.36595	1.75101	3.36595	up		1647	Hs.80409	gb:NM_001924.2 /DB_XREF=gi:9790904 /GEN=GADD45A /FEA=FLmRNA /CNT=108 /TID=Hs.80409.0 /TIER=FL+Stack /STK=63 /UG=Hs.80409 /LL=1647 /DEF=Homo sapiens growth arrest and DNA-damage-inducible, alpha (GADD45A), mRNA. /PROD=growth arrest and DNA-damage-inducible, alpha /FL=gb:M60974.1 gb:NM_001924.2
ZNF266	7.71466e-11	3.85204e-13	-1.79603	-0.844813	1.79603	down	-1.53387	-0.617176	1.53387	down	-1.7809	-0.832606	1.7809	down	-2.34028	-1.22668	2.34028	down	-1.76694	-0.821255	1.76694	down	-2.45124	-1.29351	2.45124	down	-2.59279	-1.37451	2.59279	down		10781	Hs.656185	gb:AA868898 /DB_XREF=gi:2964343 /DB_XREF=ak55b08.s1 /CLONE=IMAGE:1409847 /FEA=mRNA /CNT=49 /TID=Hs.118281.0 /TIER=ConsEnd /STK=1 /UG=Hs.118281 /LL=10781 /UG_GENE=ZNF266 /UG_TITLE=zinc finger protein 266
DACH1	8.14533e-11	4.08198e-13	2.98031	1.57546	2.98031	up	2.33707	1.2247	2.33707	up	2.36518	1.24195	2.36518	up	3.2439	1.69773	3.2439	up	2.27238	1.1842	2.27238	up	4.25748	2.09	4.25748	up	4.1845	2.06506	4.1845	up		1602	Hs.129452	gb:AW772082 /DB_XREF=gi:7704144 /DB_XREF=hn67b07.x1 /CLONE=IMAGE:3032917 /FEA=FLmRNA /CNT=52 /TID=Hs.63931.0 /TIER=Stack /STK=10 /UG=Hs.63931 /LL=1602 /UG_GENE=DACH /UG_TITLE=dachshund (Drosophila) homolog /FL=gb:AF102546.1 gb:NM_004392.1
PNPLA1	8.20166e-11	4.12521e-13	1.69278	0.759398	1.69278	up	1.18644	0.246635	1.18644	up	1.3267	0.407843	1.3267	up	1.76241	0.817548	1.76241	up	1.48082	0.566394	1.48082	up	1.89953	0.92564	1.89953	up	1.62472	0.700188	1.62472	up		285848	Hs.407002	gb:NM_173676.1 /DB_XREF=gi:27734926 /TID=Hs2.407002.1 /CNT=3 /FEA=FLmRNA /TIER=FL /STK=1 /LL=285848 /UG_GENE=FLJ38755 /UG=Hs.407002 /UG_TITLE=hypothetical protein FLJ38755 /DEF=Homo sapiens hypothetical protein FLJ38755 (FLJ38755), mRNA. /FL=gb:NM_173676.1
KLF7	8.40612e-11	4.24342e-13	1.62252	0.698232	1.62252	up	1.3301	0.411538	1.3301	up	1.35014	0.433105	1.35014	up	1.43016	0.516175	1.43016	up	1.27733	0.353131	1.27733	up	1.82232	0.865773	1.82232	up	1.57774	0.657863	1.57774	up		8609	Hs.59908	gb:AL120562 /DB_XREF=gi:5926461 /DB_XREF=DKFZp761B249_r1 /CLONE=DKFZp761B249 /FEA=EST /CNT=10 /TID=Hs.46472.0 /TIER=ConsEnd /STK=0 /UG=Hs.46472 /UG_TITLE=ESTs
PLOD1	8.47429e-11	4.35131e-13	1.25776	0.330859	1.25776	up	1.45343	0.539463	1.45343	up	1.43863	0.524692	1.43863	up	1.7296	0.790437	1.7296	up	1.59944	0.677563	1.59944	up	1.75177	0.808812	1.75177	up	2.03579	1.02559	2.03579	up		5351	Hs.75093	gb:NM_000302.1 /DB_XREF=gi:4557836 /GEN=PLOD /FEA=FLmRNA /CNT=324 /TID=Hs.75093.0 /TIER=FL+Stack /STK=134 /UG=Hs.75093 /LL=5351 /DEF=Homo sapiens procollagen-lysine, 2-oxoglutarate 5-dioxygenase (lysine hydroxylase, Ehlers-Danlos syndrome type VI) (PLOD), mRNA. /PROD=procollagen-lysine 5-dioxygenase /FL=gb:L06419.1 gb:NM_000302.1
LIMK2	8.47429e-11	4.34577e-13	2.22163	1.15162	2.22163	up	1.75905	0.814794	1.75905	up	1.73849	0.797831	1.73849	up	2.44504	1.28986	2.44504	up	1.75963	0.81527	1.75963	up	2.48736	1.31462	2.48736	up	2.41491	1.27197	2.41491	up		3985	Hs.474596	gb:AL117466.1 /DB_XREF=gi:5911930 /GEN=DKFZp586K0922 /FEA=FLmRNA /CNT=6 /TID=Hs.278027.1 /TIER=FL /STK=0 /UG=Hs.278027 /LL=3985 /DEF=Homo sapiens mRNA; cDNA DKFZp586K0922 (from clone DKFZp586K0922); complete cds. /PROD=hypothetical protein /FL=gb:AL117466.1 gb:NM_016733.1
	8.47429e-11	4.35533e-13	-1.39758	-0.482936	1.39758	down	-1.4083	-0.493953	1.4083	down	-1.45252	-0.538556	1.45252	down	-1.42973	-0.515738	1.42973	down	-1.33961	-0.421815	1.33961	down	-1.6595	-0.730746	1.6595	down	-1.61216	-0.688996	1.61216	down			Hs.677401	gb:AK026820.1 /DB_XREF=gi:10439765 /FEA=mRNA /CNT=2 /TID=Hs.287730.0 /TIER=ConsEnd /STK=0 /UG=Hs.287730 /UG_TITLE=Homo sapiens cDNA: FLJ23167 fis, clone LNG09902 /DEF=Homo sapiens cDNA: FLJ23167 fis, clone LNG09902.
ROPN1L	8.47429e-11	4.32547e-13	2.49305	1.31791	2.49305	up	1.84402	0.882858	1.84402	up	1.78331	0.834559	1.78331	up	2.59111	1.37357	2.59111	up	1.96492	0.974468	1.96492	up	2.6148	1.3867	2.6148	up	2.77488	1.47242	2.77488	up		83853	Hs.381089	gb:AF239723.1 /DB_XREF=gi:12539614 /GEN=ASP /FEA=FLmRNA /CNT=38 /TID=Hs.41644.0 /TIER=FL+Stack /STK=28 /UG=Hs.41644 /DEF=Homo sapiens AKAP-associated sperm protein (ASP) mRNA, complete cds. /PROD=AKAP-associated sperm protein /FL=gb:AF239723.1
ZNF600	8.47429e-11	4.29909e-13	-2.12903	-1.0902	2.12903	down	-3.31556	-1.72925	3.31556	down	-2.41246	-1.2705	2.41246	down	-3.09587	-1.63035	3.09587	down	-2.25073	-1.17039	2.25073	down	-3.34763	-1.74314	3.34763	down	-3.82593	-1.93581	3.82593	down		162966	Hs.696848	gb:AI620827 /DB_XREF=gi:4629953 /DB_XREF=tu86c12.x1 /CLONE=IMAGE:2257942 /FEA=EST /CNT=3 /TID=Hs.116391.0 /TIER=ConsEnd /STK=3 /UG=Hs.116391 /UG_TITLE=ESTs, Weakly similar to A32891 finger protein 1, placental (H.sapiens)
OSCAR	8.66391e-11	4.46863e-13	2.77952	1.47483	2.77952	up	2.4614	1.29948	2.4614	up	2.41032	1.26922	2.41032	up	3.2825	1.7148	3.2825	up	2.27195	1.18393	2.27195	up	3.62442	1.85775	3.62442	up	3.76743	1.91358	3.76743	up		126014	Hs.347655	gb:BC035023.1 /DB_XREF=gi:23273931 /TID=Hs2.347655.3 /CNT=12 /FEA=FLmRNA /TIER=FL /STK=1 /LL=126014 /UG_GENE=OSCAR /UG=Hs.347655 /DEF=Homo sapiens, Similar to osteoclast-associated receptor, clone MGC:33613 IMAGE:4825982, mRNA, complete cds. /PROD=Similar to osteoclast-associated receptor /FL=gb:BC035023.1
LOC100134822	9.01682e-11	4.68192e-13	4.94658	2.30643	4.94658	up	5.09458	2.34896	5.09458	up	4.42528	2.14577	4.42528	up	5.42787	2.44039	5.42787	up	3.76035	1.91087	3.76035	up	4.82601	2.27083	4.82601	up	6.00247	2.58556	6.00247	up		100134822	Hs.744675	gb:AL137655.1 /DB_XREF=gi:6807773 /FEA=mRNA /CNT=22 /TID=Hs.271713.0 /TIER=ConsEnd /STK=0 /UG=Hs.271713 /UG_TITLE=Homo sapiens mRNA; cDNA DKFZp434B2016 (from clone DKFZp434B2016) /DEF=Homo sapiens mRNA; cDNA DKFZp434B2016 (from clone DKFZp434B2016).
	9.01682e-11	4.68364e-13	2.75926	1.46428	2.75926	up	2.47886	1.30968	2.47886	up	2.12051	1.08441	2.12051	up	2.73418	1.45111	2.73418	up	2.15229	1.10587	2.15229	up	2.96438	1.56773	2.96438	up	3.00857	1.58908	3.00857	up			Hs.673456	gb:AW197431 /DB_XREF=gi:6476661 /DB_XREF=xm39b03.x1 /CLONE=IMAGE:2686541 /FEA=EST /CNT=7 /TID=Hs.192123.0 /TIER=ConsEnd /STK=6 /UG=Hs.192123 /UG_TITLE=ESTs
ZNF26	9.85617e-11	5.13764e-13	-1.60044	-0.678472	1.60044	down	-1.88637	-0.915613	1.88637	down	-1.5399	-0.622833	1.5399	down	-1.63986	-0.713569	1.63986	down	-1.52767	-0.611332	1.52767	down	-1.82882	-0.870913	1.82882	down	-1.80182	-0.849453	1.80182	down		7574	Hs.489608	gb:BC046206.1 /DB_XREF=gi:28279327 /TID=Hs2Affx.1.198 /CNT=1 /FEA=FLmRNA /TIER=FL /STK=1 /NOTE=sequence(s) not in UniGene /DEF=Homo sapiens, Similar to zinc finger protein 268, clone MGC:57843 IMAGE:6176427, mRNA, complete cds. /PROD=Similar to zinc finger protein 268 /FL=gb:BC046206.1
UST	1.08846e-10	5.69362e-13	-1.40185	-0.487332	1.40185	down	-1.80091	-0.848723	1.80091	down	-1.33143	-0.412982	1.33143	down	-1.50841	-0.59303	1.50841	down	-1.45977	-0.545737	1.45977	down	-1.65024	-0.722676	1.65024	down	-1.63732	-0.711336	1.63732	down		10090	Hs.657370	gb:NM_005715.1 /DB_XREF=gi:5032218 /GEN=UST /FEA=FLmRNA /CNT=48 /TID=Hs.134015.0 /TIER=FL+Stack /STK=10 /UG=Hs.134015 /LL=10090 /DEF=Homo sapiens uronyl 2-sulfotransferase (UST), mRNA. /PROD=uronyl 2-sulfotransferase /FL=gb:AB020316.1 gb:NM_005715.1
LOC93622	1.15055e-10	6.03944e-13	-2.15326	-1.10652	2.15326	down	-2.21567	-1.14774	2.21567	down	-1.92065	-0.941591	1.92065	down	-2.46999	-1.30451	2.46999	down	-1.61822	-0.69441	1.61822	down	-2.5732	-1.36356	2.5732	down	-2.52938	-1.33878	2.52938	down		93622	Hs.6815	gb:AL562398 /DB_XREF=gi:12910778 /DB_XREF=AL562398 /CLONE=CS0DC008YD20 (3 prime) /FEA=mRNA /CNT=92 /TID=Hs.6815.0 /TIER=Stack /STK=36 /UG=Hs.6815 /UG_TITLE=Homo sapiens cDNA: FLJ22722 fis, clone HSI14444
PGLYRP1	1.19378e-10	6.28825e-13	3.26896	1.70883	3.26896	up	3.23985	1.69593	3.23985	up	3.1985	1.67739	3.1985	up	4.13757	2.04878	4.13757	up	3.77093	1.91492	3.77093	up	5.0018	2.32245	5.0018	up	5.42683	2.44011	5.42683	up		8993	Hs.137583	gb:NM_005091.1 /DB_XREF=gi:4827035 /GEN=PGLYRP /FEA=FLmRNA /CNT=7 /TID=Hs.137583.0 /TIER=FL /STK=0 /UG=Hs.137583 /LL=8993 /DEF=Homo sapiens peptidoglycan recognition protein (PGLYRP), mRNA. /PROD=peptidoglycan recognition protein /FL=gb:NM_005091.1 gb:AF242517.1 gb:AF076483.1
MGAM	1.20266e-10	6.35699e-13	5.38125	2.42794	5.38125	up	3.53564	1.82197	3.53564	up	3.94581	1.98032	3.94581	up	5.62825	2.49269	5.62825	up	4.31241	2.1085	4.31241	up	5.13749	2.36106	5.13749	up	4.64731	2.2164	4.64731	up		8972	Hs.122785	gb:NM_004668.1 /DB_XREF=gi:4758711 /GEN=MGAM /FEA=FLmRNA /CNT=22 /TID=Hs.122785.0 /TIER=FL /STK=0 /UG=Hs.122785 /LL=8972 /DEF=Homo sapiens maltase-glucoamylase (alpha-glucosidase) (MGAM), mRNA. /PROD=alpha-glucosidase /FL=gb:AF016833.1 gb:NM_004668.1
KLRD1	1.24221e-10	6.58878e-13	-1.76628	-0.820712	1.76628	down	-1.80713	-0.853699	1.80713	down	-1.8572	-0.893127	1.8572	down	-2.08685	-1.06133	2.08685	down	-1.78304	-0.834341	1.78304	down	-2.05576	-1.03967	2.05576	down	-2.17012	-1.11778	2.17012	down		3824	Hs.562457	gb:NM_007334.1 /DB_XREF=gi:7669498 /GEN=KLRD1 /FEA=FLmRNA /CNT=3 /TID=Hs.41682.0 /TIER=FL /STK=0 /UG=Hs.41682 /LL=3824 /DEF=Homo sapiens killer cell lectin-like receptor subfamily D, member 1 (KLRD1), transcript variant 2, mRNA. /PROD=killer cell lectin-like receptor subfamily D,member 1 isoform 2 /FL=gb:AB009597.1 gb:NM_007334.1
DUSP3	1.25384e-10	6.67341e-13	1.88928	0.917835	1.88928	up	1.64933	0.721882	1.64933	up	1.64134	0.714871	1.64134	up	2.27298	1.18459	2.27298	up	1.7576	0.813607	1.7576	up	2.3461	1.23026	2.3461	up	2.24626	1.16752	2.24626	up		1845	Hs.181046	gb:BC002682.1 /DB_XREF=gi:12803692 /FEA=FLmRNA /CNT=241 /TID=Hs.181046.0 /TIER=FL+Stack /STK=15 /UG=Hs.181046 /LL=1845 /UG_GENE=DUSP3 /DEF=Homo sapiens, dual specificity phosphatase 3 (vaccinia virus phosphatase VH1-related), clone MGC:3615, mRNA, complete cds. /PROD=dual specificity phosphatase 3 (vaccinia virusphosphatase VH1-related) /FL=gb:BC002682.1 gb:NM_004090.1 gb:L05147.1
PHLDB2	1.26534e-10	6.75773e-13	-1.64873	-0.721356	1.64873	down	-2.03916	-1.02798	2.03916	down	-1.72618	-0.787581	1.72618	down	-2.10023	-1.07055	2.10023	down	-1.64719	-0.720005	1.64719	down	-2.06752	-1.0479	2.06752	down	-2.11659	-1.08174	2.11659	down		90102	Hs.603252	gb:AK025444.1 /DB_XREF=gi:10437958 /FEA=mRNA /CNT=88 /TID=Hs.7378.0 /TIER=Stack /STK=33 /UG=Hs.7378 /UG_TITLE=Homo sapiens mRNA; cDNA DKFZp434G227 (from clone DKFZp434G227) /DEF=Homo sapiens cDNA: FLJ21791 fis, clone HEP00433.
NCR3	1.2722e-10	6.81762e-13	-1.72775	-0.788892	1.72775	down	-1.36829	-0.452378	1.36829	down	-1.57654	-0.656761	1.57654	down	-1.71159	-0.77534	1.71159	down	-1.50433	-0.589118	1.50433	down	-1.83953	-0.87934	1.83953	down	-1.79588	-0.844693	1.79588	down		259197	Hs.509513	gb:AF031138.1 /DB_XREF=gi:2623876 /FEA=FLmRNA /CNT=5 /TID=Hs.88411.5 /TIER=FL /STK=2 /UG=Hs.88411 /LL=7940 /UG_GENE=LY117 /DEF=Homo sapiens 1C7 precursor, mRNA, alternatively spliced, complete cds. /PROD=1C7 precursor /FL=gb:AF031138.1
GGT1///GGT2///GGTLC1///GGTLC2///LOC102724197	1.29786e-10	6.97889e-13	1.26484	0.338954	1.26484	up	1.17761	0.235865	1.17761	up	1.18559	0.245607	1.18559	up	1.36044	0.444077	1.36044	up	1.19752	0.260055	1.19752	up	1.55002	0.632289	1.55002	up	1.60893	0.686106	1.60893	up		2678///91227///92086///728441///102724197	Hs.632765///Hs.645535	gb:NM_013421.1 /DB_XREF=gi:9845490 /GEN=GGT1 /FEA=FLmRNA /CNT=2 /TID=Hs.284380.0 /TIER=FL /STK=0 /UG=Hs.284380 /LL=2678 /DEF=Homo sapiens gamma-glutamyltransferase 1 (GGT1), transcript variant 2, mRNA. /PROD=gamma-glutamyltransferase 1 precursor /FL=gb:NM_013421.1 gb:J04131.1
GCLM	1.31743e-10	7.10821e-13	2.2825	1.19062	2.2825	up	1.78313	0.834413	1.78313	up	1.56439	0.645598	1.56439	up	2.1585	1.11003	2.1585	up	2.10535	1.07406	2.10535	up	3.01969	1.5944	3.01969	up	2.08413	1.05945	2.08413	up		2730	Hs.315562	gb:AI753488 /DB_XREF=gi:5131752 /DB_XREF=cr11d02.x1 /CLONE=HBMSC_cr11d02 /FEA=EST /CNT=11 /TID=Hs.193452.0 /TIER=ConsEnd /STK=1 /UG=Hs.193452 /UG_TITLE=ESTs, Weakly similar to ALU1_HUMAN ALU SUBFAMILY J SEQUENCE CONTAMINATION WARNING ENTRY (H.sapiens)
S100P	1.34411e-10	7.27677e-13	3.65693	1.87063	3.65693	up	3.6398	1.86386	3.6398	up	2.51884	1.33276	2.51884	up	3.58555	1.84219	3.58555	up	3.53308	1.82093	3.53308	up	5.89036	2.55835	5.89036	up	4.85314	2.27892	4.85314	up		6286	Hs.2962	gb:NM_005980.1 /DB_XREF=gi:5174662 /GEN=S100P /FEA=FLmRNA /CNT=106 /TID=Hs.2962.0 /TIER=FL+Stack /STK=38 /UG=Hs.2962 /LL=6286 /DEF=Homo sapiens S100 calcium-binding protein P (S100P), mRNA. /PROD=S100 calcium-binding protein P /FL=gb:NM_005980.1
CEACAM4	1.36679e-10	7.42452e-13	1.54649	0.628994	1.54649	up	1.79992	0.847933	1.79992	up	1.57403	0.654465	1.57403	up	1.94375	0.958842	1.94375	up	1.61117	0.68811	1.61117	up	1.95588	0.967822	1.95588	up	2.18729	1.12914	2.18729	up		1089	Hs.12	gb:NM_001817.1 /DB_XREF=gi:4502796 /GEN=CEACAM4 /FEA=FLmRNA /CNT=6 /TID=Hs.12.0 /TIER=FL /STK=0 /UG=Hs.12 /LL=1089 /DEF=Homo sapiens carcinoembryonic antigen-related cell adhesion molecule 4 (CEACAM4), mRNA. /PROD=carcinoembryonic antigen-related cell adhesionmolecule 4 /FL=gb:NM_001817.1
NLRC4	1.39537e-10	7.60532e-13	3.99336	1.9976	3.99336	up	3.0583	1.61273	3.0583	up	3.00218	1.58601	3.00218	up	4.28812	2.10034	4.28812	up	3.09875	1.63169	3.09875	up	5.00602	2.32366	5.00602	up	4.45613	2.15579	4.45613	up		58484	Hs.574741	gb:NM_021209.2 /DB_XREF=gi:20127597 /GEN=CARD12 /TID=Hs2.23248.1 /CNT=8 /FEA=FLmRNA /TIER=FL /STK=3 /LL=58484 /UG=Hs.23248 /DEF=Homo sapiens caspase recruitment domain family, member 12 (CARD12), mRNA. /PROD=caspase recruitment domain protein 12 /FL=gb:AY027790.1 gb:NM_021209.2 gb:AY027789.1 gb:AY035391.1 gb:AY027787.1
MDS2	1.40216e-10	7.66794e-13	-1.3583	-0.441802	1.3583	down	-1.42054	-0.506438	1.42054	down	-1.31326	-0.393152	1.31326	down	-1.5388	-0.621807	1.5388	down	-1.38345	-0.468275	1.38345	down	-1.65482	-0.72667	1.65482	down	-1.553	-0.635061	1.553	down		259283	Hs.523369	gb:BC041472.1 /DB_XREF=gi:27371099 /TID=Hs2.434421.1 /CNT=2 /FEA=mRNA /TIER=ConsEnd /STK=0 /UG=Hs.434421 /UG_TITLE=Homo sapiens, clone IMAGE:5229269, mRNA /DEF=Homo sapiens, clone IMAGE:5229269, mRNA.
	1.46863e-10	8.05832e-13	-1.72805	-0.789148	1.72805	down	-1.9825	-0.987322	1.9825	down	-1.80594	-0.852753	1.80594	down	-1.90462	-0.929503	1.90462	down	-1.6426	-0.715982	1.6426	down	-2.12951	-1.09052	2.12951	down	-2.18862	-1.13002	2.18862	down				gb:AA977218 /DB_XREF=gi:3154664 /DB_XREF=oq25h05.s1 /CLONE=IMAGE:1587417 /FEA=EST /CNT=13 /TID=Hs.118142.0 /TIER=ConsEnd /STK=6 /UG=Hs.118142 /UG_TITLE=ESTs
PFKFB2	1.49118e-10	8.20934e-13	5.35285	2.42031	5.35285	up	2.03276	1.02344	2.03276	up	2.11421	1.08012	2.11421	up	3.86004	1.94861	3.86004	up	2.2107	1.1445	2.2107	up	5.62021	2.49062	5.62021	up	4.02695	2.00969	4.02695	up		5208	Hs.282702	gb:AB044805.1 /DB_XREF=gi:11933148 /FEA=FLmRNA /CNT=32 /TID=Hs.211585.1 /TIER=FL /STK=0 /UG=Hs.211585 /LL=5208 /UG_GENE=PFKFB2 /DEF=Homo sapiens mRNA for 6-phosphofructo-2-kinase heart isoform, complete cds. /PROD=6-phosphofructo-2-kinase heart isoform /FL=gb:AB044805.1
TBC1D4	1.5028e-10	8.30076e-13	-3.19439	-1.67554	3.19439	down	-2.36376	-1.24108	2.36376	down	-2.30331	-1.20371	2.30331	down	-3.72789	-1.89836	3.72789	down	-2.45344	-1.2948	2.45344	down	-4.09923	-2.03535	4.09923	down	-4.29541	-2.10279	4.29541	down		9882	Hs.210891	gb:AI650848 /DB_XREF=gi:4734827 /DB_XREF=wa95d04.x1 /CLONE=IMAGE:2303911 /FEA=FLmRNA /CNT=110 /TID=Hs.173802.0 /TIER=Stack /STK=37 /UG=Hs.173802 /LL=9882 /UG_GENE=KIAA0603 /UG_TITLE=KIAA0603 gene product /FL=gb:NM_014832.1 gb:AB011175.1
GOLGA8A///GOLGA8B	1.53264e-10	8.53051e-13	-2.0107	-1.0077	2.0107	down	-2.79384	-1.48225	2.79384	down	-1.84276	-0.881866	1.84276	down	-2.82168	-1.49656	2.82168	down	-1.94054	-0.956458	1.94054	down	-3.10599	-1.63505	3.10599	down	-2.90019	-1.53615	2.90019	down		23015///440270	Hs.720151	gb:AF164622.1 /DB_XREF=gi:7211437 /GEN=GOLGA5 /FEA=FLmRNA /CNT=7 /TID=Hs.182982.1 /TIER=FL /STK=0 /UG=Hs.182982 /LL=23015 /DEF=Homo sapiens golgin-67 (GOLGA5) mRNA, complete cds. /PROD=golgin-67 /FL=gb:AF163441.1 gb:AF164622.1
ACVR1B	1.53264e-10	8.54969e-13	1.8725	0.904968	1.8725	up	1.51464	0.598973	1.51464	up	1.56458	0.645774	1.56458	up	2.02677	1.01918	2.02677	up	1.73917	0.7984	1.73917	up	2.20466	1.14055	2.20466	up	2.30215	1.20298	2.30215	up		91	Hs.438918	gb:AL117643.1 /DB_XREF=gi:5912233 /FEA=mRNA /CNT=63 /TID=Hs.5288.0 /TIER=Stack /STK=47 /UG=Hs.5288 /UG_TITLE=Homo sapiens mRNA; cDNA DKFZp434M245 (from clone DKFZp434M245) /DEF=Homo sapiens mRNA; cDNA DKFZp434M245 (from clone DKFZp434M245).
ATP11B	1.53264e-10	8.51237e-13	3.08553	1.62552	3.08553	up	3.28394	1.71543	3.28394	up	2.37273	1.24655	2.37273	up	2.91983	1.54588	2.91983	up	2.05663	1.04028	2.05663	up	3.28228	1.7147	3.28228	up	3.14702	1.65399	3.14702	up		23200	Hs.478429	gb:AK093727.1 /DB_XREF=gi:21752654 /TID=Hs2.75478.5 /CNT=1 /FEA=mRNA /TIER=ConsEnd /STK=0 /LL=23200 /UG_GENE=ATP11B /UG=Hs.75478 /UG_TITLE=ATPase, Class VI, type 11B /DEF=Homo sapiens cDNA FLJ36408 fis, clone THYMU2010094, highly similar to POTENTIAL PHOSPHOLIPID-TRANSPORTING ATPASE IR (EC 3.6.1.-).
KREMEN1	1.53382e-10	8.58433e-13	3.43532	1.78044	3.43532	up	2.85915	1.51559	2.85915	up	3.85936	1.94836	3.85936	up	4.89017	2.28989	4.89017	up	3.80839	1.92918	3.80839	up	4.35953	2.12417	4.35953	up	5.40489	2.43426	5.40489	up		83999	Hs.229335	gb:BF221745 /DB_XREF=gi:11128922 /DB_XREF=7o61g05.x1 /CLONE=IMAGE:3578696 /FEA=EST /CNT=38 /TID=Hs.26942.0 /TIER=Stack /STK=19 /UG=Hs.26942 /UG_TITLE=ESTs
PLD1	1.54753e-10	8.68938e-13	2.05252	1.0374	2.05252	up	1.723	0.784926	1.723	up	1.68885	0.756042	1.68885	up	1.75993	0.815516	1.75993	up	1.6974	0.763329	1.6974	up	2.27605	1.18653	2.27605	up	2.02089	1.01499	2.02089	up		5337	Hs.382865	gb:AI378587 /DB_XREF=gi:4188440 /DB_XREF=tc72c12.x1 /CLONE=IMAGE:2070166 /FEA=EST /CNT=37 /TID=Hs.93837.2 /TIER=Stack /STK=12 /UG=Hs.93837 /LL=9600 /UG_GENE=PITPNM /UG_TITLE=phosphatidylinositol transfer protein, membrane-associated
LDLR	1.59413e-10	8.9802e-13	1.02616	0.0372501	1.02616	up	1.13319	0.180396	1.13319	up	1.15554	0.208561	1.15554	up	1.31816	0.398523	1.31816	up	1.32788	0.409122	1.32788	up	1.52886	0.612452	1.52886	up	1.53603	0.619205	1.53603	up		3949	Hs.713981	gb:AI861942 /DB_XREF=gi:5526049 /DB_XREF=td18b10.x1 /CLONE=IMAGE:2075995 /FEA=FLmRNA /CNT=162 /TID=Hs.213289.0 /TIER=Stack /STK=8 /UG=Hs.213289 /LL=3949 /UG_GENE=LDLR /UG_TITLE=low density lipoprotein receptor (familial hypercholesterolemia) /FL=gb:NM_000527.2
ATG7	1.61488e-10	9.12661e-13	1.75601	0.8123	1.75601	up	1.9461	0.960586	1.9461	up	1.87322	0.905517	1.87322	up	2.13687	1.0955	2.13687	up	1.91015	0.933688	1.91015	up	2.10511	1.0739	2.10511	up	2.38428	1.25355	2.38428	up		10533	Hs.38032	gb:NM_006395.1 /DB_XREF=gi:5453667 /GEN=GSA7 /FEA=FLmRNA /CNT=76 /TID=Hs.278607.0 /TIER=FL+Stack /STK=32 /UG=Hs.278607 /LL=10533 /DEF=Homo sapiens ubiquitin activating enzyme E1-like protein (GSA7), mRNA. /PROD=ubiquitin activating enzyme E1-like protein /FL=gb:AF094516.1 gb:NM_006395.1
SEMA4A	1.63413e-10	9.26532e-13	2.60552	1.38157	2.60552	up	2.11624	1.0815	2.11624	up	2.21363	1.14641	2.21363	up	2.98149	1.57603	2.98149	up	2.25876	1.17553	2.25876	up	2.71738	1.44221	2.71738	up	3.16171	1.6607	3.16171	up		64218		gb:AU147993 /DB_XREF=gi:11009514 /DB_XREF=AU147993 /CLONE=MAMMA1002329 /FEA=mRNA /CNT=3 /TID=Hs.296717.0 /TIER=ConsEnd /STK=1 /UG=Hs.296717 /UG_TITLE=Homo sapiens cDNA FLJ12354 fis, clone MAMMA1002329, weakly similar to M.musculus mRNA for semaphorin B
FCAR	1.64009e-10	9.3291e-13	3.4098	1.76969	3.4098	up	2.56115	1.35679	2.56115	up	2.41644	1.27288	2.41644	up	3.28055	1.71394	3.28055	up	1.94202	0.957559	1.94202	up	3.15883	1.65939	3.15883	up	2.93141	1.55159	2.93141	up		2204	Hs.659872	gb:D87858.1 /DB_XREF=gi:1561545 /FEA=FLmRNA /CNT=2 /TID=Hs.193122.5 /TIER=FL /STK=0 /UG=Hs.193122 /LL=2204 /UG_GENE=FCAR /DEF=Homo sapiens mRNA for CD89_U04, complete cds. /PROD=CD89_U04 /FL=gb:D87860.1 gb:D87858.1
IRAK3	1.64936e-10	9.41201e-13	3.33159	1.73621	3.33159	up	8.10033	3.01798	8.10033	up	4.40693	2.13977	4.40693	up	4.58738	2.19767	4.58738	up	2.82164	1.49654	2.82164	up	4.83707	2.27413	4.83707	up	5.5251	2.466	5.5251	up		11213	Hs.369265	gb:BC029493.1 /DB_XREF=gi:20810473 /TID=Hs2.398198.1 /CNT=5 /FEA=mRNA /TIER=ConsEnd /STK=1 /UG=Hs.398198 /UG_TITLE=Homo sapiens, Similar to interleukin-1 receptor-associated kinase M, clone IMAGE:5271512, mRNA /DEF=Homo sapiens, Similar to interleukin-1 receptor-associated kinase M, clone IMAGE:5271512, mRNA.
ACSL1	1.66939e-10	9.55679e-13	2.98012	1.57537	2.98012	up	2.452	1.29396	2.452	up	2.38478	1.25386	2.38478	up	2.92021	1.54607	2.92021	up	2.3104	1.20815	2.3104	up	3.00764	1.58863	3.00764	up	2.52037	1.33364	2.52037	up		2180	Hs.406678	gb:NM_021122.2 /DB_XREF=gi:12669906 /GEN=FACL2 /FEA=FLmRNA /CNT=226 /TID=Hs.154890.0 /TIER=FL+Stack /STK=86 /UG=Hs.154890 /LL=2180 /DEF=Homo sapiens fatty-acid-Coenzyme A ligase, long-chain 2 (FACL2), mRNA. /PROD=long-chain fatty-acid-Coenzyme A ligase 2 /FL=gb:D10040.1 gb:NM_021122.2
BPI	1.68388e-10	9.67056e-13	4.37974	2.13084	4.37974	up	4.53963	2.18257	4.53963	up	5.27728	2.39979	5.27728	up	5.15368	2.3656	5.15368	up	5.97956	2.58004	5.97956	up	8.767	3.13208	8.767	up	7.85692	2.97396	7.85692	up		671	Hs.529019	gb:NM_001725.1 /DB_XREF=gi:4502446 /GEN=BPI /FEA=FLmRNA /CNT=47 /TID=Hs.89535.0 /TIER=FL+Stack /STK=10 /UG=Hs.89535 /LL=671 /DEF=Homo sapiens bactericidalpermeability-increasing protein (BPI), mRNA. /PROD=bactericidalpermeability-increasing proteinprecursor /FL=gb:J04739.1 gb:AF322588.1 gb:NM_001725.1
ADAM28	1.69293e-10	9.75351e-13	-1.84341	-0.882378	1.84341	down	-2.36239	-1.24025	2.36239	down	-1.80681	-0.853446	1.80681	down	-2.05365	-1.03819	2.05365	down	-1.62578	-0.70113	1.62578	down	-2.78199	-1.47612	2.78199	down	-2.7646	-1.46707	2.7646	down		10863	Hs.174030	gb:NM_021778.1 /DB_XREF=gi:11496995 /GEN=ADAM28 /FEA=FLmRNA /CNT=28 /TID=Hs.174030.0 /TIER=FL /STK=7 /UG=Hs.174030 /LL=10863 /DEF=Homo sapiens a disintegrin and metalloproteinase domain 28 (ADAM28), transcript variant 2, mRNA. /PROD=a disintegrin and metalloproteinase domain 28,isoform 2 preproprotein /FL=gb:AF137334.1 gb:NM_021778.1 gb:NM_014265.1
MAPK14	1.70075e-10	9.82967e-13	2.93948	1.55556	2.93948	up	2.33687	1.22458	2.33687	up	2.16635	1.11527	2.16635	up	2.87144	1.52177	2.87144	up	2.06886	1.04884	2.06886	up	2.8739	1.52301	2.8739	up	2.675	1.41954	2.675	up		1432	Hs.485233	gb:NM_001315.1 /DB_XREF=gi:4503068 /GEN=MAPK14 /FEA=FLmRNA /CNT=154 /TID=Hs.79107.0 /TIER=FL+Stack /STK=55 /UG=Hs.79107 /LL=1432 /DEF=Homo sapiens mitogen-activated protein kinase 14 (MAPK14), mRNA. /PROD=mitogen-activated protein kinase 14 /FL=gb:L35263.1 gb:NM_001315.1
VNN1	1.74255e-10	1.01031e-12	4.78243	2.25774	4.78243	up	2.94064	1.55613	2.94064	up	4.0196	2.00705	4.0196	up	5.41379	2.43664	5.41379	up	4.99867	2.32155	4.99867	up	7.22416	2.85283	7.22416	up	6.07696	2.60335	6.07696	up		8876	Hs.12114///Hs.720659	gb:BG120535 /DB_XREF=gi:12614044 /DB_XREF=602346858F1 /CLONE=IMAGE:4441695 /TID=Hs2.379831.1 /CNT=12 /FEA=mRNA /TIER=ConsEnd /STK=0 /UG=Hs.379831 /UG_TITLE=Homo sapiens cDNA FLJ38142 fis, clone D9OST2003108, highly similar to Homo sapiens mRNA for VNN1 protein.
MRVI1	1.80787e-10	1.05149e-12	3.15279	1.65663	3.15279	up	1.86818	0.901634	1.86818	up	1.47065	0.55645	1.47065	up	2.48519	1.31336	2.48519	up	1.31841	0.398801	1.31841	up	2.28167	1.19009	2.28167	up	1.93463	0.952058	1.93463	up		10335	Hs.501898	gb:N66571 /DB_XREF=gi:1218696 /DB_XREF=yy69d08.s1 /CLONE=IMAGE:278799 /FEA=mRNA /CNT=60 /TID=Hs.26243.0 /TIER=Stack /STK=26 /UG=Hs.26243 /UG_TITLE=Homo sapiens cDNA FLJ11177 fis, clone PLACE1007402
SMARCAD1	1.80849e-10	1.05516e-12	-1.76848	-0.822511	1.76848	down	-2.06804	-1.04826	2.06804	down	-1.64097	-0.71455	1.64097	down	-2.13102	-1.09154	2.13102	down	-1.66947	-0.739394	1.66947	down	-2.13901	-1.09695	2.13901	down	-2.25398	-1.17248	2.25398	down		56916	Hs.410406	gb:AI807204 /DB_XREF=gi:5393770 /DB_XREF=wf38a09.x1 /CLONE=IMAGE:2357848 /FEA=FLmRNA /CNT=107 /TID=Hs.21356.0 /TIER=Stack /STK=24 /UG=Hs.21356 /LL=56916 /UG_GENE=DKFZp762K2015 /UG_TITLE=hypothetical protein DKFZp762K2015 /FL=gb:AY008271.1
RALGPS2	1.82192e-10	1.06633e-12	-1.42264	-0.508574	1.42264	down	-1.99012	-0.992858	1.99012	down	-1.91129	-0.934543	1.91129	down	-1.88277	-0.912859	1.88277	down	-1.79614	-0.844902	1.79614	down	-2.53467	-1.3418	2.53467	down	-2.9111	-1.54156	2.9111	down		55103	Hs.632485	gb:AW003297 /DB_XREF=gi:5850213 /DB_XREF=wq65b01.x1 /CLONE=IMAGE:2476105 /FEA=EST /CNT=39 /TID=Hs.174104.0 /TIER=Stack /STK=25 /UG=Hs.174104 /UG_TITLE=ESTs
PYHIN1	1.91123e-10	1.12209e-12	-3.37179	-1.75351	3.37179	down	-3.93474	-1.97627	3.93474	down	-3.35252	-1.74525	3.35252	down	-4.49571	-2.16855	4.49571	down	-2.61143	-1.38484	2.61143	down	-4.07037	-2.02516	4.07037	down	-4.44056	-2.15074	4.44056	down		149628	Hs.745322	gb:AI827431 /DB_XREF=gi:5448102 /DB_XREF=wl17b02.x1 /CLONE=IMAGE:2425131 /FEA=EST /CNT=4 /TID=Hs.224645.0 /TIER=ConsEnd /STK=4 /UG=Hs.224645 /UG_TITLE=ESTs, Weakly similar to IF16_HUMAN GAMMA-INTERFERON-INDUCIBLE PROTEIN IFI-16 (H.sapiens)
BASP1	1.91346e-10	1.1269e-12	2.4778	1.30906	2.4778	up	2.44766	1.2914	2.44766	up	2.2053	1.14098	2.2053	up	2.87535	1.52374	2.87535	up	2.19715	1.13563	2.19715	up	2.78579	1.47809	2.78579	up	2.9312	1.55149	2.9312	up		10409	Hs.201641	gb:NM_006317.1 /DB_XREF=gi:5453749 /GEN=BASP1 /FEA=FLmRNA /CNT=228 /TID=Hs.79516.0 /TIER=FL+Stack /STK=47 /UG=Hs.79516 /LL=10409 /DEF=Homo sapiens brain acid-soluble protein 1 (BASP1), mRNA. /PROD=brain acid-soluble protein 1 /FL=gb:AF039656.1 gb:NM_006317.1 gb:BC000518.1
NOG	1.96292e-10	1.15962e-12	-3.04926	-1.60846	3.04926	down	-2.57997	-1.36735	2.57997	down	-2.64588	-1.40375	2.64588	down	-4.31945	-2.11085	4.31945	down	-2.59441	-1.3754	2.59441	down	-4.94758	-2.30672	4.94758	down	-4.3746	-2.12915	4.3746	down		9241	Hs.248201	gb:AL575177 /DB_XREF=gi:12936088 /DB_XREF=AL575177 /CLONE=CS0DI063YJ07 (3 prime) /FEA=FLmRNA /CNT=7 /TID=Hs.248201.0 /TIER=ConsEnd /STK=1 /UG=Hs.248201 /LL=9241 /UG_GENE=NOG /UG_TITLE=noggin /FL=gb:NM_005450.1
BCL2A1	2.03154e-10	1.20387e-12	4.46002	2.15705	4.46002	up	2.77999	1.47508	2.77999	up	2.40197	1.26422	2.40197	up	3.70342	1.88886	3.70342	up	2.66668	1.41504	2.66668	up	5.64926	2.49806	5.64926	up	3.22243	1.68815	3.22243	up		597	Hs.227817	gb:NM_004049.1 /DB_XREF=gi:4757839 /GEN=BCL2A1 /FEA=FLmRNA /CNT=32 /TID=Hs.227817.0 /TIER=FL+Stack /STK=11 /UG=Hs.227817 /LL=597 /DEF=Homo sapiens BCL2-related protein A1 (BCL2A1), mRNA. /PROD=BCL2-related protein A1 /FL=gb:U27467.1 gb:U29680.1 gb:NM_004049.1
FGFBP2	2.05042e-10	1.21881e-12	-4.16151	-2.05711	4.16151	down	-5.52506	-2.46599	5.52506	down	-4.333	-2.11537	4.333	down	-6.05231	-2.59749	6.05231	down	-3.6721	-1.87661	3.6721	down	-5.61584	-2.4895	5.61584	down	-6.94192	-2.79534	6.94192	down		83888	Hs.98785	gb:AB021123.1 /DB_XREF=gi:13442781 /FEA=FLmRNA /CNT=10 /TID=Hs.98785.0 /TIER=FL /STK=7 /UG=Hs.98785 /DEF=Homo sapiens mRNA for Ksp37, complete cds. /PROD=Ksp37 /FL=gb:AB021123.1
PEX3	2.08454e-10	1.24291e-12	-2.24071	-1.16395	2.24071	down	-3.67973	-1.8796	3.67973	down	-2.1903	-1.13113	2.1903	down	-2.94659	-1.55905	2.94659	down	-2.10927	-1.07675	2.10927	down	-3.08081	-1.62331	3.08081	down	-3.47562	-1.79727	3.47562	down		8504	Hs.7277	gb:NM_003630.1 /DB_XREF=gi:4505726 /GEN=PEX3 /FEA=FLmRNA /CNT=82 /TID=Hs.7277.0 /TIER=FL+Stack /STK=18 /UG=Hs.7277 /LL=8504 /DEF=Homo sapiens peroxisomal biogenesis factor 3 (PEX3), mRNA. /PROD=peroxisomal biogenesis factor 3 /FL=gb:AB035307.1 gb:NM_003630.1
ATXN7L3	2.18978e-10	1.31367e-12	1.15671	0.210028	1.15671	up	1.02978	0.0423349	1.02978	up	1.09611	0.132397	1.09611	up	1.2767	0.352424	1.2767	up	1.17559	0.233389	1.17559	up	1.29625	0.374344	1.29625	up	1.40106	0.48652	1.40106	up		56970	Hs.512651	gb:AL390158.1 /DB_XREF=gi:9368848 /GEN=DKFZp761G2113 /FEA=mRNA /CNT=131 /TID=Hs.181391.0 /TIER=Stack /STK=51 /UG=Hs.181391 /LL=56970 /DEF=Homo sapiens mRNA; cDNA DKFZp761G2113 (from clone DKFZp761G2113). /PROD=hypothetical protein
IGIP	2.18978e-10	1.3125e-12	-1.6363	-0.710437	1.6363	down	-1.8249	-0.86782	1.8249	down	-1.46383	-0.549747	1.46383	down	-1.97397	-0.981099	1.97397	down	-1.6621	-0.733003	1.6621	down	-2.03346	-1.02394	2.03346	down	-2.20223	-1.13897	2.20223	down		492311	Hs.696360	gb:N26029 /DB_XREF=gi:1140377 /DB_XREF=yx89a08.s1 /CLONE=IMAGE:268886 /FEA=EST /CNT=56 /TID=Hs.293782.0 /TIER=Stack /STK=45 /UG=Hs.293782 /UG_TITLE=ESTs
CEP78	2.33855e-10	1.4072e-12	-1.83662	-0.877053	1.83662	down	-1.70781	-0.77215	1.70781	down	-1.81135	-0.857066	1.81135	down	-2.09298	-1.06556	2.09298	down	-1.52906	-0.612642	1.52906	down	-1.84851	-0.886365	1.84851	down	-2.04207	-1.03003	2.04207	down		84131	Hs.374421	gb:AW268594 /DB_XREF=gi:6655624 /DB_XREF=xv34h06.x1 /CLONE=IMAGE:2815067 /FEA=EST /CNT=21 /TID=Hs.50421.1 /TIER=Stack /STK=18 /UG=Hs.50421 /LL=9821 /UG_GENE=KIAA0203 /UG_TITLE=KIAA0203 gene product
NLRC3	2.38618e-10	1.44022e-12	-3.08076	-1.62329	3.08076	down	-3.02216	-1.59558	3.02216	down	-2.56127	-1.35686	2.56127	down	-3.5058	-1.80974	3.5058	down	-2.32461	-1.21699	2.32461	down	-4.05347	-2.01916	4.05347	down	-3.81784	-1.93276	3.81784	down		197358	Hs.592091	gb:AA694067 /DB_XREF=gi:2695005 /DB_XREF=zi51h03.s1 /CLONE=IMAGE:434357 /FEA=EST /CNT=7 /TID=Hs.145668.1 /TIER=ConsEnd /STK=7 /UG=Hs.145668 /UG_TITLE=ESTs
FCAR	2.39568e-10	1.45322e-12	4.24728	2.08654	4.24728	up	2.32404	1.21664	2.32404	up	2.75382	1.46143	2.75382	up	4.22259	2.07813	4.22259	up	2.33994	1.22647	2.33994	up	4.46388	2.1583	4.46388	up	3.62996	1.85995	3.62996	up		2204	Hs.659872	gb:U43677.1 /DB_XREF=gi:1439557 /GEN=CD89 /FEA=FLmRNA /CNT=4 /TID=Hs.193122.3 /TIER=FL /STK=0 /UG=Hs.193122 /LL=2204 /DEF=Human Fc alpha receptor, splice variant FcalphaR a.3 (CD89) mRNA, complete cds. /PROD=Fc alpha receptor /FL=gb:D87856.1 gb:D87854.1 gb:U43677.1
FAM110B	2.39568e-10	1.45472e-12	1.62207	0.69784	1.62207	up	1.58317	0.662814	1.58317	up	1.2832	0.359744	1.2832	up	1.64805	0.720762	1.64805	up	1.37739	0.461935	1.37739	up	2.03922	1.02802	2.03922	up	1.95014	0.96358	1.95014	up		90362	Hs.154652	gb:AW264082 /DB_XREF=gi:6640898 /DB_XREF=xq83e05.x1 /CLONE=IMAGE:2757248 /FEA=mRNA /CNT=23 /TID=Hs.74280.0 /TIER=Stack /STK=8 /UG=Hs.74280 /UG_TITLE=Homo sapiens cDNA FLJ13596 fis, clone PLACE1009637
SQRDL	2.53797e-10	1.54576e-12	2.09984	1.07028	2.09984	up	1.78966	0.839688	1.78966	up	1.6414	0.714926	1.6414	up	2.32351	1.2163	2.32351	up	1.98949	0.992395	1.98949	up	2.62387	1.3917	2.62387	up	2.45421	1.29526	2.45421	up		58472	Hs.511251	gb:NM_021199.1 /DB_XREF=gi:10864010 /GEN=CGI-44 /FEA=FLmRNA /CNT=179 /TID=Hs.8185.0 /TIER=FL+Stack /STK=61 /UG=Hs.8185 /LL=58472 /DEF=Homo sapiens CGI-44 protein; sulfide dehydrogenase like (yeast) (CGI-44), mRNA. /PROD=CGI-44 protein; sulfide dehydrogenase like(yeast) /FL=gb:AF118085.1 gb:AF151802.1 gb:NM_021199.1
DUSP3	2.58412e-10	1.57859e-12	1.34741	0.430192	1.34741	up	1.34641	0.429119	1.34641	up	1.3377	0.41975	1.3377	up	1.60587	0.683351	1.60587	up	1.3579	0.44138	1.3579	up	1.72533	0.786871	1.72533	up	1.75316	0.809957	1.75316	up		1845	Hs.181046	gb:NM_004090.1 /DB_XREF=gi:4758207 /GEN=DUSP3 /FEA=FLmRNA /CNT=241 /TID=Hs.181046.0 /TIER=FL /STK=0 /UG=Hs.181046 /LL=1845 /DEF=Homo sapiens dual specificity phosphatase 3 (vaccinia virus phosphatase VH1-related) (DUSP3), mRNA. /PROD=dual specificity phosphatase 3 /FL=gb:BC002682.1 gb:NM_004090.1 gb:L05147.1
LOC728613///PDCD6	2.58607e-10	1.58451e-12	-1.32135	-0.402013	1.32135	down	-1.27885	-0.354849	1.27885	down	-1.28057	-0.356788	1.28057	down	-1.464	-0.549915	1.464	down	-1.37895	-0.46357	1.37895	down	-1.62668	-0.701929	1.62668	down	-1.66101	-0.732064	1.66101	down		10016///728613	Hs.50823///Hs.660513///Hs.720393	gb:BC020552.1 /DB_XREF=gi:21594227 /TID=Hs2.356020.2 /CNT=10 /FEA=mRNA /TIER=ConsEnd /STK=0 /UG=Hs.356020 /UG_TITLE=Homo sapiens, Similar to programmed cell death 6, clone IMAGE:4992672, mRNA /DEF=Homo sapiens, clone IMAGE:2901119, mRNA.
CD247	2.63848e-10	1.62145e-12	-3.72086	-1.89563	3.72086	down	-2.98397	-1.57724	2.98397	down	-2.80816	-1.48962	2.80816	down	-3.81603	-1.93207	3.81603	down	-2.51154	-1.32857	2.51154	down	-4.09265	-2.03303	4.09265	down	-3.9519	-1.98255	3.9519	down		919	Hs.156445	gb:J04132.1 /DB_XREF=gi:623041 /FEA=FLmRNA /CNT=28 /TID=Hs.97087.0 /TIER=FL /STK=0 /UG=Hs.97087 /LL=919 /UG_GENE=CD3Z /DEF=Human T cell receptor zeta-chain mRNA, complete cds. /PROD=T-cell receptor zeta chain /FL=gb:J04132.1 gb:NM_000734.1
KLRC4-KLRK1///KLRK1	2.72277e-10	1.67823e-12	-3.01081	-1.59015	3.01081	down	-2.83086	-1.50124	2.83086	down	-2.57076	-1.3622	2.57076	down	-3.74659	-1.90558	3.74659	down	-2.45772	-1.29732	2.45772	down	-3.84519	-1.94306	3.84519	down	-4.08535	-2.03046	4.08535	down		22914///100528032	Hs.387787	gb:NM_007360.1 /DB_XREF=gi:6679051 /GEN=D12S2489E /FEA=FLmRNA /CNT=24 /TID=Hs.74085.0 /TIER=FL /STK=0 /UG=Hs.74085 /LL=22914 /DEF=Homo sapiens DNA segment on chromosome 12 (unique) 2489 expressed sequence (D12S2489E), mRNA. /PROD=NKG2-D type II integral membrane protein /FL=gb:AF260135.1 gb:AF260136.1 gb:NM_007360.1
HDAC9	2.7498e-10	1.69992e-12	-1.70505	-0.769816	1.70505	down	-1.93701	-0.953832	1.93701	down	-1.59251	-0.671298	1.59251	down	-1.90754	-0.931715	1.90754	down	-1.4731	-0.558852	1.4731	down	-2.60119	-1.37917	2.60119	down	-2.28576	-1.19268	2.28576	down		9734	Hs.196054	gb:NM_014707.1 /DB_XREF=gi:7662279 /GEN=HDAC7B-PENDING /FEA=FLmRNA /CNT=32 /TID=Hs.116753.0 /TIER=FL /STK=6 /UG=Hs.116753 /LL=9734 /DEF=Homo sapiens histone deacetylase 7B (HDAC7B-PENDING), mRNA. /PROD=histone deacetylase 7B /FL=gb:AB018287.1 gb:NM_014707.1
RCAN3	2.81858e-10	1.74759e-12	-3.23946	-1.69575	3.23946	down	-2.60486	-1.38121	2.60486	down	-2.35919	-1.23829	2.35919	down	-3.61195	-1.85278	3.61195	down	-2.66905	-1.41633	2.66905	down	-4.59858	-2.20119	4.59858	down	-4.25874	-2.09043	4.25874	down		11123		gb:N25986 /DB_XREF=gi:1140334 /DB_XREF=yx88c06.s1 /CLONE=IMAGE:268810 /FEA=EST /CNT=67 /TID=Hs.22380.1 /TIER=Stack /STK=20 /UG=Hs.22380 /UG_TITLE=ESTs
TOX	2.90846e-10	1.80864e-12	-2.68536	-1.42512	2.68536	down	-2.6499	-1.40594	2.6499	down	-2.60486	-1.3812	2.60486	down	-3.09734	-1.63103	3.09734	down	-2.38275	-1.25263	2.38275	down	-2.97153	-1.57121	2.97153	down	-3.229	-1.69109	3.229	down		9760	Hs.491805	gb:AI961231 /DB_XREF=gi:5753944 /DB_XREF=wt15c09.x1 /CLONE=IMAGE:2507536 /FEA=FLmRNA /CNT=75 /TID=Hs.184297.0 /TIER=Stack /STK=9 /UG=Hs.184297 /LL=9760 /UG_GENE=KIAA0808 /UG_TITLE=KIAA0808 gene product /FL=gb:AB018351.1 gb:NM_014729.1
GNPDA2	2.94525e-10	1.83691e-12	-1.62576	-0.701116	1.62576	down	-2.01325	-1.00953	2.01325	down	-1.63332	-0.707808	1.63332	down	-1.97481	-0.981717	1.97481	down	-1.61356	-0.690245	1.61356	down	-2.17247	-1.11934	2.17247	down	-2.19589	-1.13481	2.19589	down		132789	Hs.21398	gb:AI817388 /DB_XREF=gi:5436467 /DB_XREF=wk23f08.x1 /CLONE=IMAGE:2413191 /FEA=EST /CNT=34 /TID=Hs.21398.0 /TIER=Stack /STK=18 /UG=Hs.21398 /UG_TITLE=ESTs, Moderately similar to A Chain A, Human Glucosamine-6-Phosphate Deaminase Isomerase At 1.75 A (H.sapiens)
MACROD2	3.07911e-10	1.92603e-12	-1.97181	-0.97952	1.97181	down	-2.51956	-1.33317	2.51956	down	-2.12593	-1.08809	2.12593	down	-2.63488	-1.39774	2.63488	down	-2.37039	-1.24512	2.37039	down	-3.46781	-1.79402	3.46781	down	-3.31651	-1.72967	3.31651	down		140733	Hs.661576	gb:BF032500 /DB_XREF=gi:10740212 /DB_XREF=601453326F1 /CLONE=IMAGE:3856854 /FEA=EST /CNT=12 /TID=Hs.136585.0 /TIER=ConsEnd /STK=0 /UG=Hs.136585 /UG_TITLE=ESTs
DYRK2	3.16331e-10	1.98448e-12	-2.19253	-1.13259	2.19253	down	-2.21504	-1.14733	2.21504	down	-1.99424	-0.995842	1.99424	down	-2.53274	-1.3407	2.53274	down	-1.8903	-0.918615	1.8903	down	-2.56539	-1.35918	2.56539	down	-2.65911	-1.41095	2.65911	down		8445		gb:AI192838 /DB_XREF=gi:3744047 /DB_XREF=qe63c04.x1 /CLONE=IMAGE:1743654 /FEA=FLmRNA /CNT=129 /TID=Hs.173135.1 /TIER=ConsEnd /STK=2 /UG=Hs.173135 /LL=8445 /UG_GENE=DYRK2 /UG_TITLE=dual-specificity tyrosine-(Y)-phosphorylation regulated kinase 2 /FL=gb:NM_006482.1
GNA15	3.20799e-10	2.01838e-12	1.59298	0.671724	1.59298	up	1.36934	0.453485	1.36934	up	1.43284	0.518873	1.43284	up	1.66964	0.739534	1.66964	up	1.4969	0.581979	1.4969	up	2.1116	1.07833	2.1116	up	2.00618	1.00445	2.00618	up		2769	Hs.73797	gb:NM_002068.1 /DB_XREF=gi:4504038 /GEN=GNA15 /FEA=FLmRNA /CNT=38 /TID=Hs.73797.0 /TIER=FL+Stack /STK=16 /UG=Hs.73797 /LL=2769 /DEF=Homo sapiens guanine nucleotide binding protein (G protein), alpha 15 (Gq class) (GNA15), mRNA. /PROD=guanine nucleotide binding protein (G protein),alpha 15 (Gq class) /FL=gb:NM_002068.1 gb:M63904.1
ERCC1	3.26137e-10	2.05793e-12	-1.65035	-0.722774	1.65035	down	-1.80675	-0.853397	1.80675	down	-1.43933	-0.525393	1.43933	down	-1.81887	-0.863039	1.81887	down	-1.50006	-0.585021	1.50006	down	-2.20637	-1.14168	2.20637	down	-1.9114	-0.934627	1.9114	down		2067	Hs.435981	gb:BG111047 /DB_XREF=gi:12604553 /DB_XREF=602284729F1 /CLONE=IMAGE:4372302 /FEA=EST /CNT=18 /TID=Hs.25523.0 /TIER=Stack /STK=8 /UG=Hs.25523 /UG_TITLE=ESTs, Weakly similar to ALU6_HUMAN ALU SUBFAMILY SP SEQUENCE CONTAMINATION WARNING ENTRY (H.sapiens)
BATF	3.33665e-10	2.11154e-12	1.27566	0.351241	1.27566	up	1.29286	0.370569	1.29286	up	1.19745	0.25996	1.19745	up	1.39633	0.481644	1.39633	up	1.33313	0.414818	1.33313	up	1.62207	0.697839	1.62207	up	1.61907	0.695169	1.61907	up		10538	Hs.509964	gb:NM_006399.1 /DB_XREF=gi:5453562 /GEN=BATF /FEA=FLmRNA /CNT=24 /TID=Hs.41691.0 /TIER=FL+Stack /STK=13 /UG=Hs.41691 /LL=10538 /DEF=Homo sapiens basic leucine zipper transcription factor, ATF-like (BATF), mRNA. /PROD=basic leucine zipper transcription factor,ATF-like /FL=gb:U15460.1 gb:D42106.1 gb:NM_006399.1
GRAMD1C	3.3383e-10	2.11868e-12	-1.55832	-0.639992	1.55832	down	-1.67317	-0.742587	1.67317	down	-1.38655	-0.471496	1.38655	down	-1.85624	-0.89238	1.85624	down	-1.48153	-0.567087	1.48153	down	-1.93606	-0.953123	1.93606	down	-1.90593	-0.930494	1.90593	down		54762	Hs.24583	gb:NM_017577.1 /DB_XREF=gi:8922125 /GEN=DKFZp434C0328 /FEA=FLmRNA /CNT=57 /TID=Hs.24583.0 /TIER=FL /STK=0 /UG=Hs.24583 /LL=54762 /DEF=Homo sapiens hypothetical protein DKFZp434C0328 (DKFZp434C0328), mRNA. /PROD=hypothetical protein DKFZp434C0328 /FL=gb:NM_017577.1
LRRN1	3.37158e-10	2.14597e-12	3.676	1.87814	3.676	up	1.56972	0.650506	1.56972	up	1.41491	0.500707	1.41491	up	2.56485	1.35887	2.56485	up	1.58804	0.667247	1.58804	up	2.8525	1.51223	2.8525	up	2.16497	1.11435	2.16497	up		57633	Hs.163244	gb:N71874 /DB_XREF=gi:1228586 /DB_XREF=yz34f06.s1 /CLONE=IMAGE:284963 /FEA=mRNA /CNT=49 /TID=Hs.126085.0 /TIER=Stack /STK=14 /UG=Hs.126085 /LL=57633 /UG_GENE=KIAA1497 /UG_TITLE=KIAA1497 protein
CR1	3.38091e-10	2.15809e-12	3.78507	1.92032	3.78507	up	3.71279	1.89251	3.71279	up	3.18859	1.67292	3.18859	up	3.72723	1.8981	3.72723	up	2.81719	1.49426	2.81719	up	3.97952	1.99259	3.97952	up	4.09602	2.03422	4.09602	up		1378	Hs.334019	gb:AI432713 /DB_XREF=gi:4283899 /DB_XREF=th43e02.x1 /CLONE=IMAGE:2121050 /FEA=EST /CNT=5 /TID=Hs.241053.0 /TIER=ConsEnd /STK=4 /UG=Hs.241053 /UG_TITLE=ESTs
PLCXD2	3.39892e-10	2.17581e-12	-2.81552	-1.4934	2.81552	down	-3.36989	-1.7527	3.36989	down	-2.68081	-1.42267	2.68081	down	-3.377	-1.75574	3.377	down	-2.4138	-1.27131	2.4138	down	-3.55713	-1.83071	3.55713	down	-3.98694	-1.99528	3.98694	down		257068	Hs.477114	gb:AW170015 /DB_XREF=gi:6401540 /DB_XREF=xj35g12.x1 /CLONE=IMAGE:2659270 /FEA=EST /CNT=26 /TID=Hs.6594.0 /TIER=ConsEnd /STK=6 /UG=Hs.6594 /UG_TITLE=ESTs
NAIP	3.43929e-10	2.20794e-12	6.45921	2.69136	6.45921	up	4.89652	2.29176	4.89652	up	5.36696	2.42411	5.36696	up	6.32078	2.6601	6.32078	up	4.25761	2.09005	4.25761	up	6.41	2.68032	6.41	up	6.83866	2.77371	6.83866	up		4671	Hs.654500	gb:AI817801 /DB_XREF=gi:5436880 /DB_XREF=wk40d12.x1 /CLONE=IMAGE:2417879 /FEA=FLmRNA /CNT=49 /TID=Hs.79019.0 /TIER=Stack /STK=10 /UG=Hs.79019 /LL=4671 /UG_GENE=BIRC1 /UG_TITLE=baculoviral IAP repeat-containing 1 /FL=gb:NM_004536.1 gb:U19251.1
FAM20A	3.46971e-10	2.23381e-12	1.97514	0.981954	1.97514	up	1.81218	0.857727	1.81218	up	1.74281	0.801412	1.74281	up	2.00366	1.00264	2.00366	up	1.69224	0.75893	1.69224	up	3.00405	1.58691	3.00405	up	3.72411	1.89689	3.72411	up		54757	Hs.268874	gb:AI632223 /DB_XREF=gi:4683553 /DB_XREF=tt20d07.x1 /CLONE=IMAGE:2241325 /FEA=mRNA /CNT=57 /TID=Hs.144633.0 /TIER=Stack /STK=24 /UG=Hs.144633 /LL=54757 /UG_GENE=DKFZp434F2322 /UG_TITLE=hypothetical protein DKFZp434F2322
PHF10	3.48091e-10	2.24739e-12	-1.90258	-0.927958	1.90258	down	-2.82753	-1.49954	2.82753	down	-2.00904	-1.00651	2.00904	down	-2.47387	-1.30677	2.47387	down	-1.96516	-0.974647	1.96516	down	-2.76053	-1.46495	2.76053	down	-3.08722	-1.62631	3.08722	down		55274	Hs.435933	gb:AI818048 /DB_XREF=gi:5437127 /DB_XREF=wk41h05.x1 /CLONE=IMAGE:2418009 /FEA=mRNA /CNT=125 /TID=Hs.7759.0 /TIER=Stack /STK=64 /UG=Hs.7759 /UG_TITLE=Homo sapiens mRNA; cDNA DKFZp434J0828 (from clone DKFZp434J0828)
PADI4	3.48352e-10	2.25545e-12	2.06258	1.04445	2.06258	up	1.89032	0.918629	1.89032	up	1.91197	0.935056	1.91197	up	2.8925	1.53232	2.8925	up	2.13978	1.09746	2.13978	up	3.41361	1.7713	3.41361	up	3.7248	1.89716	3.7248	up		23569	Hs.522969	gb:AF229067.1 /DB_XREF=gi:8980666 /FEA=FLmRNA /CNT=1 /TID=Hs.283960.0 /TIER=FL /STK=0 /UG=Hs.283960 /DEF=Homo sapiens PADI-H protein mRNA, complete cds. /PROD=PADI-H protein /FL=gb:AF229067.1
MPEG1	3.53916e-10	2.29795e-12	-1.47717	-0.562839	1.47717	down	-1.32195	-0.402669	1.32195	down	-1.46284	-0.54877	1.46284	down	-1.61405	-0.690685	1.61405	down	-1.58744	-0.666706	1.58744	down	-2.47373	-1.30669	2.47373	down	-2.39297	-1.2588	2.39297	down		219972	Hs.744920	gb:BF590697 /DB_XREF=gi:11682943 /DB_XREF=7h39d02.x1 /CLONE=IMAGE:3318339 /FEA=mRNA /CNT=72 /TID=Hs.288581.0 /TIER=Stack /STK=37 /UG=Hs.288581 /UG_TITLE=Homo sapiens cDNA FLJ14296 fis, clone PLACE1008455
PSMB2	3.56637e-10	2.32214e-12	-1.41903	-0.504908	1.41903	down	-1.47663	-0.562304	1.47663	down	-1.36047	-0.444109	1.36047	down	-1.70915	-0.773278	1.70915	down	-1.4059	-0.491492	1.4059	down	-1.794	-0.843178	1.794	down	-1.73297	-0.793246	1.73297	down		5690		gb:AW043830 /DB_XREF=gi:5904359 /DB_XREF=wy81d04.x1 /CLONE=IMAGE:2554951 /FEA=EST /CNT=8 /TID=Hs.23531.0 /TIER=Stack /STK=8 /UG=Hs.23531 /UG_TITLE=ESTs
DNAJC24	3.58807e-10	2.3537e-12	-1.71196	-0.775651	1.71196	down	-2.33327	-1.22235	2.33327	down	-1.83527	-0.875989	1.83527	down	-2.09186	-1.06479	2.09186	down	-1.69647	-0.762537	1.69647	down	-2.25214	-1.1713	2.25214	down	-2.42448	-1.27768	2.42448	down		120526	Hs.187269	gb:AL050199.1 /DB_XREF=gi:4884438 /FEA=mRNA /CNT=20 /TID=Hs.62669.1 /TIER=Stack /STK=8 /UG=Hs.62669 /UG_TITLE=Homo sapiens mRNA; cDNA DKFZp586D0923 (from clone DKFZp586D0923) /DEF=Homo sapiens mRNA; cDNA DKFZp586D0923 (from clone DKFZp586D0923).
KIAA0930	3.58807e-10	2.35595e-12	1.75892	0.814686	1.75892	up	1.52127	0.605272	1.52127	up	1.62167	0.697481	1.62167	up	2.14623	1.10181	2.14623	up	1.75966	0.815296	1.75966	up	2.23888	1.16277	2.23888	up	2.43753	1.28542	2.43753	up		23313	Hs.592207	gb:AK025608.1 /DB_XREF=gi:10438177 /FEA=mRNA /CNT=1 /TID=Hs.13255.1 /TIER=ConsEnd /STK=0 /UG=Hs.13255 /LL=23313 /UG_GENE=KIAA0930 /UG_TITLE=KIAA0930 protein /DEF=Homo sapiens cDNA: FLJ21955 fis, clone HEP05265.
FFAR3///GPR42	3.58807e-10	2.3487e-12	1.2946	0.372503	1.2946	up	1.43979	0.525863	1.43979	up	1.3249	0.405889	1.3249	up	1.71305	0.776567	1.71305	up	1.43111	0.517134	1.43111	up	2.22316	1.15261	2.22316	up	2.31184	1.20904	2.31184	up		2865///2866	Hs.248055	gb:NM_005305.1 /DB_XREF=gi:4885330 /GEN=GPR42 /FEA=FLmRNA /CNT=3 /TID=Hs.272485.0 /TIER=FL /STK=0 /UG=Hs.272485 /LL=2866 /DEF=Homo sapiens G protein-coupled receptor 42 (GPR42), mRNA. /PROD=G protein-coupled receptor 42 /FL=gb:NM_005305.1
BTF3L4	3.67248e-10	2.41809e-12	-1.5594	-0.640994	1.5594	down	-1.67904	-0.747638	1.67904	down	-1.45696	-0.54296	1.45696	down	-1.74074	-0.799701	1.74074	down	-1.4847	-0.570168	1.4847	down	-1.82363	-0.866811	1.82363	down	-1.94737	-0.96153	1.94737	down		91408	Hs.429839	gb:AL568049 /DB_XREF=gi:12922018 /DB_XREF=AL568049 /CLONE=CS0DF031YM17 (3 prime) /FEA=EST /CNT=61 /TID=Hs.93748.0 /TIER=Stack /STK=27 /UG=Hs.93748 /UG_TITLE=ESTs, Moderately similar to 1607338A transcription factor BTF3a (H.sapiens)
FCRL3	3.73836e-10	2.46831e-12	-3.29658	-1.72097	3.29658	down	-3.42853	-1.77759	3.42853	down	-3.55451	-1.82965	3.55451	down	-4.56252	-2.18983	4.56252	down	-3.67311	-1.877	3.67311	down	-5.50184	-2.45991	5.50184	down	-5.78218	-2.53161	5.78218	down		115352		gb:BF514552 /DB_XREF=gi:11599731 /DB_XREF=UI-H-BW1-ang-b-12-0-UI.s1 /CLONE=IMAGE:3081959 /FEA=EST /CNT=8 /TID=Hs.123296.0 /TIER=Stack /STK=8 /UG=Hs.123296 /UG_TITLE=ESTs
ADK	3.76585e-10	2.49335e-12	-1.80256	-0.850049	1.80256	down	-1.59352	-0.672218	1.59352	down	-1.62927	-0.704229	1.62927	down	-1.71314	-0.776643	1.71314	down	-1.52006	-0.604125	1.52006	down	-1.99845	-0.998879	1.99845	down	-2.1176	-1.08243	2.1176	down		132	Hs.656586	gb:U90339.1 /DB_XREF=gi:1906010 /FEA=FLmRNA /CNT=87 /TID=Hs.94382.1 /TIER=FL /STK=1 /UG=Hs.94382 /LL=132 /UG_GENE=ADK /DEF=Human adenosine kinase short form mRNA, complete cds. /PROD=adenosine kinase short form /FL=gb:U90339.1 gb:U50196.1 gb:NM_001123.1 gb:BC003568.1
GGT1///GGT2///GGTLC1///GGTLC2///LOC102724197	3.8976e-10	2.5877e-12	1.25666	0.329591	1.25666	up	1.22459	0.292296	1.22459	up	1.2311	0.299949	1.2311	up	1.27861	0.354572	1.27861	up	1.23967	0.309955	1.23967	up	1.59393	0.672586	1.59393	up	1.64376	0.716998	1.64376	up		2678///91227///92086///728441///102724197	Hs.645535	gb:NM_013430.1 /DB_XREF=gi:9845492 /GEN=GGT1 /FEA=FLmRNA /CNT=9 /TID=Hs.284380.1 /TIER=FL /STK=0 /UG=Hs.284380 /LL=2678 /DEF=Homo sapiens gamma-glutamyltransferase 1 (GGT1), transcript variant 3, mRNA. /PROD=gamma-glutamyltransferase 1 /FL=gb:NM_013430.1 gb:NM_005265.1 gb:M24903.1
EMILIN2	3.92325e-10	2.61191e-12	2.7292	1.44848	2.7292	up	2.5027	1.32348	2.5027	up	2.0888	1.06267	2.0888	up	3.15253	1.65651	3.15253	up	2.25837	1.17528	2.25837	up	3.25158	1.70114	3.25158	up	3.42818	1.77744	3.42818	up		84034	Hs.532815	gb:AF270513.1 /DB_XREF=gi:13661555 /FEA=FLmRNA /CNT=1 /TID=HsAffx.900546.858 /TIER=FL /STK=0 /DEF=Homo sapiens extracellular glycoprotein EMILIN-2 precursor, mRNA, complete cds. /PROD=extracellular glycoprotein EMILIN-2 precursor /FL=gb:AF270513.1
PLSCR1	3.96233e-10	2.64517e-12	3.50395	1.80898	3.50395	up	2.07617	1.05393	2.07617	up	1.81505	0.860011	1.81505	up	2.93702	1.55435	2.93702	up	1.97391	0.981056	1.97391	up	3.57535	1.83809	3.57535	up	2.40256	1.26457	2.40256	up		5359	Hs.130759	gb:AI825926 /DB_XREF=gi:5446597 /DB_XREF=to92d05.x1 /CLONE=IMAGE:2185737 /FEA=FLmRNA /CNT=275 /TID=Hs.198282.0 /TIER=Stack /STK=14 /UG=Hs.198282 /LL=5359 /UG_GENE=PLSCR1 /UG_TITLE=phospholipid scramblase 1 /FL=gb:AB006746.1 gb:NM_021105.1 gb:AF098642.1
HLA-DRA	3.96693e-10	2.6555e-12	-1.92313	-0.943459	1.92313	down	-1.77965	-0.831593	1.77965	down	-1.69501	-0.761293	1.69501	down	-1.65528	-0.727079	1.65528	down	-1.51826	-0.602417	1.51826	down	-2.73241	-1.45017	2.73241	down	-2.72279	-1.44508	2.72279	down		3122	Hs.520048	gb:M60333.1 /DB_XREF=gi:188268 /GEN=HLA-DRA /FEA=FLmRNA /CNT=2 /TID=Hs.76807.1 /TIER=FL /STK=0 /UG=Hs.76807 /LL=3122 /DEF=Human MHC class II HLA-DRA mRNA, complete cds. /PROD=MHC cell surface glycoprotein /FL=gb:M60333.1
ACKR3	4.00385e-10	2.68754e-12	-1.76033	-0.815847	1.76033	down	-1.80064	-0.84851	1.80064	down	-1.80091	-0.848725	1.80091	down	-2.1259	-1.08807	2.1259	down	-1.74432	-0.802666	1.74432	down	-2.17837	-1.12325	2.17837	down	-2.27014	-1.18278	2.27014	down		57007	Hs.471751	gb:AI817041 /DB_XREF=gi:5436120 /DB_XREF=wj76c06.x1 /CLONE=IMAGE:2408746 /FEA=mRNA /CNT=73 /TID=Hs.23016.0 /TIER=Stack /STK=33 /UG=Hs.23016 /LL=57007 /UG_GENE=RDC1 /UG_TITLE=G protein-coupled receptor
VPS13A	4.00943e-10	2.69862e-12	-1.51864	-0.602776	1.51864	down	-1.48725	-0.572649	1.48725	down	-1.45032	-0.536373	1.45032	down	-1.81951	-0.863548	1.81951	down	-1.52662	-0.610342	1.52662	down	-1.7976	-0.846076	1.7976	down	-1.80774	-0.85419	1.80774	down		23230	Hs.655754	gb:AI186145 /DB_XREF=gi:3736783 /DB_XREF=qe46a06.x1 /CLONE=IMAGE:1742002 /FEA=mRNA /CNT=31 /TID=Hs.154336.0 /TIER=Stack /STK=12 /UG=Hs.154336 /UG_TITLE=Homo sapiens clone 24583 mRNA sequence
KLRG1	4.03592e-10	2.72383e-12	-1.80771	-0.854165	1.80771	down	-1.64497	-0.718062	1.64497	down	-1.68536	-0.753058	1.68536	down	-2.06995	-1.04959	2.06995	down	-1.61107	-0.688016	1.61107	down	-2.2744	-1.18548	2.2744	down	-2.2095	-1.14372	2.2095	down		10219	Hs.558446	gb:AF081675.1 /DB_XREF=gi:3421400 /FEA=FLmRNA /CNT=13 /TID=Hs.146322.0 /TIER=FL /STK=0 /UG=Hs.146322 /LL=10219 /UG_GENE=KLRG1 /DEF=Homo sapiens ITIM-containing receptor MAFA-L mRNA, complete cds. /PROD=ITIM-containing receptor MAFA-L /FL=gb:AF097358.1 gb:NM_005810.1 gb:AF034952.1 gb:AF081675.1
LILRA6///LILRB2///LILRB3///LOC102725015///LOC102725029///LOC102725031///LOC102725034///LOC102725035	4.04413e-10	2.73677e-12	1.42569	0.511661	1.42569	up	1.61949	0.695543	1.61949	up	1.42898	0.514987	1.42898	up	1.87191	0.904513	1.87191	up	1.45559	0.541601	1.45559	up	1.95508	0.967229	1.95508	up	2.30998	1.20788	2.30998	up		10288///11025///79168///102725015///102725029///102725031///102725034///102725035	Hs.631592///Hs.688335	gb:AF009635.1 /DB_XREF=gi:2662429 /FEA=FLmRNA /CNT=27 /TID=Hs.105928.0 /TIER=FL /STK=1 /UG=Hs.105928 /LL=11025 /UG_GENE=LILRB3 /DEF=Homo sapiens clone 17.7 immunoglobulin-like transcript 5 protein mRNA, complete cds. /PROD=immunoglobulin-like transcript 5 protein /FL=gb:AF009633.1 gb:AF009639.1 gb:AF009642.1 gb:AF009632.1 gb:AF009635.1 gb:AF009641.1 gb:AF009638.1 gb:NM_006864.1 gb:AF025533.1 gb:A…
RAB31	4.05243e-10	2.75129e-12	2.47737	1.30881	2.47737	up	2.42268	1.2766	2.42268	up	2.46236	1.30004	2.46236	up	2.87181	1.52196	2.87181	up	2.30297	1.2035	2.30297	up	3.05721	1.61222	3.05721	up	3.50427	1.80911	3.50427	up		11031	Hs.744887	gb:NM_006868.1 /DB_XREF=gi:5803130 /GEN=RAB31 /FEA=FLmRNA /CNT=424 /TID=Hs.223025.0 /TIER=FL+Stack /STK=36 /UG=Hs.223025 /LL=11031 /DEF=Homo sapiens RAB31, member RAS oncogene family (RAB31), mRNA. /PROD=RAB31, member RAS oncogene family /FL=gb:NM_006868.1 gb:U59877.1 gb:U57091.1 gb:BC001148.1 gb:AF183421.1 gb:AF234995.1
FOSL2	4.05243e-10	2.75721e-12	2.46586	1.30209	2.46586	up	2.39143	1.25788	2.39143	up	1.97873	0.984577	1.97873	up	2.93933	1.55549	2.93933	up	2.28301	1.19094	2.28301	up	2.92372	1.5478	2.92372	up	3.62439	1.85774	3.62439	up		2355	Hs.220971	gb:N36408 /DB_XREF=gi:1157550 /DB_XREF=yy33f03.s1 /CLONE=IMAGE:273053 /FEA=FLmRNA /CNT=53 /TID=Hs.325364.0 /TIER=Stack /STK=12 /UG=Hs.325364 /LL=79579 /UG_GENE=FLJ23306 /UG_TITLE=hypothetical protein FLJ23306 /FL=gb:NM_024530.1
FLOT2	4.13295e-10	2.81955e-12	1.99393	0.995613	1.99393	up	1.8163	0.861001	1.8163	up	1.63748	0.711477	1.63748	up	2.45554	1.29604	2.45554	up	1.71522	0.778397	1.71522	up	2.29134	1.19619	2.29134	up	2.52398	1.3357	2.52398	up		2319	Hs.514038	gb:NM_004475.1 /DB_XREF=gi:4758393 /GEN=FLOT2 /FEA=FLmRNA /CNT=258 /TID=Hs.184488.0 /TIER=FL+Stack /STK=76 /UG=Hs.184488 /LL=2319 /DEF=Homo sapiens flotillin 2 (FLOT2), mRNA. /PROD=flotillin 2 /FL=gb:NM_004475.1 gb:M60922.1
HNRNPR	4.16462e-10	2.84878e-12	-1.59262	-0.671403	1.59262	down	-1.74621	-0.804226	1.74621	down	-1.36156	-0.445265	1.36156	down	-1.61932	-0.695385	1.61932	down	-1.44117	-0.527239	1.44117	down	-1.73952	-0.798693	1.73952	down	-1.77453	-0.827433	1.77453	down		10236	Hs.373763	gb:AK001846.1 /DB_XREF=gi:7023367 /FEA=mRNA /CNT=15 /TID=Hs.8412.0 /TIER=ConsEnd /STK=0 /UG=Hs.8412 /UG_TITLE=Homo sapiens cDNA FLJ10984 fis, clone PLACE1001810 /DEF=Homo sapiens cDNA FLJ10984 fis, clone PLACE1001810.
CDA	4.25393e-10	2.91765e-12	2.49498	1.31903	2.49498	up	2.7058	1.43606	2.7058	up	2.47832	1.30936	2.47832	up	3.19642	1.67646	3.19642	up	2.79818	1.48449	2.79818	up	3.33146	1.73615	3.33146	up	4.05973	2.02138	4.05973	up		978	Hs.466910	gb:NM_001785.1 /DB_XREF=gi:11386156 /GEN=CDA /FEA=FLmRNA /CNT=32 /TID=Hs.72924.0 /TIER=FL+Stack /STK=10 /UG=Hs.72924 /LL=978 /DEF=Homo sapiens cytidine deaminase (CDA), mRNA. /PROD=cytidine deaminase /FL=gb:L27943.1 gb:NM_001785.1
SLC30A4	4.63859e-10	3.18996e-12	-1.64891	-0.721511	1.64891	down	-1.97731	-0.983538	1.97731	down	-1.79341	-0.842706	1.79341	down	-2.01984	-1.01424	2.01984	down	-1.68919	-0.756329	1.68919	down	-2.11286	-1.0792	2.11286	down	-2.22103	-1.15123	2.22103	down		7782	Hs.375762	gb:AI955713 /DB_XREF=gi:5748023 /DB_XREF=wt37f01.x1 /CLONE=IMAGE:2509657 /FEA=EST /CNT=40 /TID=Hs.23023.0 /TIER=Stack /STK=15 /UG=Hs.23023 /UG_TITLE=ESTs
LOC285628	4.7059e-10	3.24486e-12	-1.44798	-0.534042	1.44798	down	-1.55287	-0.634938	1.55287	down	-1.51821	-0.602373	1.51821	down	-1.62303	-0.698688	1.62303	down	-1.37573	-0.460202	1.37573	down	-1.68078	-0.749129	1.68078	down	-1.705	-0.76977	1.705	down		285628	Hs.735831	gb:AL389942.1 /DB_XREF=gi:9367848 /FEA=mRNA /CNT=6 /TID=Hs.157752.0 /TIER=ConsEnd /STK=3 /UG=Hs.157752 /UG_TITLE=Homo sapiens mRNA full length insert cDNA clone EUROIMAGE 2005635 /DEF=Homo sapiens mRNA full length insert cDNA clone EUROIMAGE 2005635.
FAM110B	5.0621e-10	3.49973e-12	1.34805	0.43087	1.34805	up	1.17105	0.2278	1.17105	up	1.14474	0.195025	1.14474	up	1.37087	0.455091	1.37087	up	1.13545	0.183262	1.13545	up	1.56877	0.649633	1.56877	up	1.62969	0.704595	1.62969	up		90362	Hs.154652	gb:BE672313 /DB_XREF=gi:10032854 /DB_XREF=7a59b10.x1 /CLONE=IMAGE:3223003 /FEA=mRNA /CNT=52 /TID=Hs.34054.0 /TIER=Stack /STK=13 /UG=Hs.34054 /UG_TITLE=Homo sapiens cDNA: FLJ22488 fis, clone HRC10948, highly similar to HSU79298 Human clone 23803 mRNA
HSPA1A///HSPA1B	5.08265e-10	3.52323e-12	2.39688	1.26116	2.39688	up	1.99688	0.997748	1.99688	up	2.06623	1.047	2.06623	up	2.82604	1.49878	2.82604	up	2.28922	1.19486	2.28922	up	4.091	2.03245	4.091	up	2.94446	1.558	2.94446	up		3303///3304	Hs.274402///Hs.719966	gb:NM_005346.2 /DB_XREF=gi:5579470 /GEN=HSPA1B /FEA=FLmRNA /CNT=124 /TID=Hs.274402.0 /TIER=FL+Stack /STK=11 /UG=Hs.274402 /LL=3304 /DEF=Homo sapiens heat shock 70kD protein 1B (HSPA1B), mRNA. /PROD=heat shock 70kD protein 1B /FL=gb:NM_005346.2
EVL	5.23368e-10	3.63749e-12	-3.10776	-1.63587	3.10776	down	-2.31426	-1.21055	2.31426	down	-2.45504	-1.29575	2.45504	down	-2.81498	-1.49313	2.81498	down	-2.21536	-1.14754	2.21536	down	-3.05099	-1.60928	3.05099	down	-2.76434	-1.46693	2.76434	down		51466	Hs.125867	gb:NM_016337.1 /DB_XREF=gi:7706686 /GEN=RNB6 /FEA=FLmRNA /CNT=260 /TID=Hs.241471.0 /TIER=FL+Stack /STK=133 /UG=Hs.241471 /LL=51466 /DEF=Homo sapiens RNB6 (RNB6), mRNA. /PROD=RNB6 /FL=gb:AF052504.1 gb:NM_016337.1
GCOM1///POLR2M	5.26125e-10	3.66627e-12	-1.60822	-0.685467	1.60822	down	-1.90005	-0.926039	1.90005	down	-1.65127	-0.723575	1.65127	down	-1.82924	-0.871244	1.82924	down	-1.53614	-0.619309	1.53614	down	-1.99036	-0.993032	1.99036	down	-2.14035	-1.09785	2.14035	down		81488///145781	Hs.437256	gb:BE645501 /DB_XREF=gi:9969812 /DB_XREF=7e71d06.x1 /CLONE=IMAGE:3287915 /FEA=mRNA /CNT=188 /TID=Hs.6283.0 /TIER=Stack /STK=12 /UG=Hs.6283 /LL=26006 /UG_GENE=DKFZP586F1918 /UG_TITLE=DKFZP586F1918 protein
	5.60869e-10	3.91865e-12	2.7657	1.46764	2.7657	up	2.91954	1.54574	2.91954	up	1.98967	0.992527	1.98967	up	2.80106	1.48597	2.80106	up	2.09479	1.06681	2.09479	up	2.94984	1.56064	2.94984	up	2.85606	1.51402	2.85606	up			Hs.662783	gb:AA468422 /DB_XREF=gi:2194956 /DB_XREF=nc78f02.r1 /CLONE=IMAGE:783483 /FEA=EST /CNT=8 /TID=Hs.267200.0 /TIER=ConsEnd /STK=0 /UG=Hs.267200 /UG_TITLE=ESTs, Moderately similar to T20D3.3 (C.elegans)
DCUN1D3	5.64348e-10	3.95328e-12	1.39398	0.479206	1.39398	up	1.2961	0.374175	1.2961	up	1.26396	0.337956	1.26396	up	1.38466	0.469535	1.38466	up	1.28596	0.36285	1.28596	up	1.50579	0.590521	1.50579	up	1.49987	0.58484	1.49987	up		123879	Hs.592571	gb:AK027199.1 /DB_XREF=gi:10440269 /FEA=mRNA /CNT=39 /TID=Hs.101007.0 /TIER=Stack /STK=20 /UG=Hs.101007 /UG_TITLE=Homo sapiens cDNA: FLJ23546 fis, clone LNG08361 /DEF=Homo sapiens cDNA: FLJ23546 fis, clone LNG08361.
RRAGD	5.65e-10	3.96818e-12	2.12423	1.08694	2.12423	up	2.46238	1.30006	2.46238	up	2.37594	1.2485	2.37594	up	2.51534	1.33075	2.51534	up	2.02007	1.0144	2.02007	up	2.70694	1.43666	2.70694	up	2.93551	1.55361	2.93551	up		58528	Hs.31712	gb:AF272036.1 /DB_XREF=gi:11181619 /FEA=FLmRNA /CNT=138 /TID=Hs.238679.0 /TIER=FL+Stack /STK=42 /UG=Hs.238679 /LL=58528 /UG_GENE=RAGD /DEF=Homo sapiens Rag D mRNA, complete cds. /PROD=Rag D /FL=gb:NM_021244.1 gb:AF272036.1 gb:BC003088.1
ZNF146	5.67114e-10	4.00377e-12	-2.10516	-1.07393	2.10516	down	-2.77398	-1.47196	2.77398	down	-2.14258	-1.09935	2.14258	down	-2.60392	-1.38068	2.60392	down	-1.79907	-0.847252	1.79907	down	-2.64393	-1.40269	2.64393	down	-3.12206	-1.6425	3.12206	down		7705	Hs.643436	gb:NM_007145.1 /DB_XREF=gi:6005965 /GEN=ZNF146 /FEA=FLmRNA /CNT=138 /TID=Hs.301819.0 /TIER=FL+Stack /STK=43 /UG=Hs.301819 /LL=7705 /DEF=Homo sapiens zinc finger protein 146 (ZNF146), mRNA. /PROD=zinc finger protein 146 /FL=gb:BC005154.1 gb:NM_007145.1
SNX25	5.67114e-10	4.00347e-12	-1.73197	-0.792413	1.73197	down	-1.74925	-0.806739	1.74925	down	-1.71966	-0.782128	1.71966	down	-1.93636	-0.953348	1.93636	down	-1.47491	-0.560624	1.47491	down	-1.9336	-0.951292	1.9336	down	-2.01784	-1.01281	2.01784	down		83891	Hs.369091	gb:AW008976 /DB_XREF=gi:5857754 /DB_XREF=ws75f08.x1 /CLONE=IMAGE:2503815 /FEA=mRNA /CNT=30 /TID=Hs.42768.2 /TIER=Stack /STK=9 /UG=Hs.42768 /LL=55805 /UG_GENE=DKFZp761O0113 /UG_TITLE=hypothetical protein DKFZp761O0113
ZNF286A///ZNF286B	5.73398e-10	4.05862e-12	-1.80404	-0.851231	1.80404	down	-1.70475	-0.769564	1.70475	down	-1.67633	-0.745303	1.67633	down	-2.05277	-1.03757	2.05277	down	-1.5883	-0.667487	1.5883	down	-2.35328	-1.23467	2.35328	down	-2.39326	-1.25898	2.39326	down		57335///729288	Hs.534279///Hs.585799	gb:BF432238 /DB_XREF=gi:11444352 /DB_XREF=nab87c07.x1 /CLONE=IMAGE:3274741 /FEA=EST /CNT=30 /TID=Hs.22216.0 /TIER=Stack /STK=18 /UG=Hs.22216 /LL=5466 /UG_GENE=PPARAL /UG_TITLE=peroxisome proliferative activated receptor, alpha-like
PNPLA6	5.79134e-10	4.11972e-12	1.30348	0.382368	1.30348	up	1.23579	0.305433	1.23579	up	1.1393	0.188154	1.1393	up	1.56594	0.647031	1.56594	up	1.30526	0.384338	1.30526	up	1.82509	0.86797	1.82509	up	1.72105	0.783291	1.72105	up		10908	Hs.631863	gb:NM_006702.1 /DB_XREF=gi:5729950 /GEN=NTE /FEA=FLmRNA /CNT=82 /TID=Hs.5038.0 /TIER=FL /STK=0 /UG=Hs.5038 /LL=10908 /DEF=Homo sapiens neuropathy target esterase (NTE), mRNA. /PROD=neuropathy target esterase /FL=gb:NM_006702.1
PADI2	5.79134e-10	4.1204e-12	2.26158	1.17733	2.26158	up	2.30318	1.20363	2.30318	up	2.14274	1.09945	2.14274	up	2.73952	1.45392	2.73952	up	2.02275	1.01632	2.02275	up	2.7773	1.47369	2.7773	up	2.96758	1.56929	2.96758	up		11240	Hs.33455	gb:AL049569 /DB_XREF=gi:5263031 /FEA=FLmRNA /CNT=48 /TID=Hs.33455.0 /TIER=Stack /STK=8 /UG=Hs.33455 /LL=11240 /UG_GENE=PDI2 /UG_TITLE=peptidyl arginine deiminase, type II /DEF=Human DNA sequence from clone RP1-37C10 on chromosome 1p35.2-35.21. Contains the gene for the ortholog of mouse and rat PDI (protein-arginine deiminase (KIAA0994, EC 3.5.3.15, peptidylarginine deiminase)), the SDHB gene for…
RASGRP4	5.87809e-10	4.19287e-12	1.8607	0.895849	1.8607	up	1.56929	0.650112	1.56929	up	1.61873	0.694861	1.61873	up	2.21247	1.14566	2.21247	up	1.56001	0.641553	1.56001	up	1.863	0.897631	1.863	up	2.20824	1.1429	2.20824	up		115727	Hs.130434	gb:AA923524 /DB_XREF=gi:3070833 /DB_XREF=ol83a11.s1 /CLONE=IMAGE:1536188 /FEA=EST /CNT=4 /TID=Hs.130434.0 /TIER=ConsEnd /STK=4 /UG=Hs.130434 /UG_TITLE=ESTs
CNNM3	6.05345e-10	4.32903e-12	-1.48136	-0.566919	1.48136	down	-1.45684	-0.542844	1.45684	down	-1.36712	-0.451137	1.36712	down	-1.52211	-0.606075	1.52211	down	-1.281	-0.357273	1.281	down	-1.60156	-0.679477	1.60156	down	-1.5928	-0.671566	1.5928	down		26505		gb:AI379751 /DB_XREF=gi:4189604 /DB_XREF=tc41e07.x1 /CLONE=IMAGE:2067204 /FEA=EST /CNT=4 /TID=Hs.158935.0 /TIER=ConsEnd /STK=4 /UG=Hs.158935 /UG_TITLE=ESTs, Weakly similar to ORF2 (M.musculus)
ATP11B	6.07269e-10	4.3539e-12	1.62592	0.701254	1.62592	up	1.51939	0.603489	1.51939	up	1.45081	0.53686	1.45081	up	1.65535	0.727132	1.65535	up	1.3871	0.472067	1.3871	up	2.0329	1.02354	2.0329	up	1.78541	0.836258	1.78541	up		23200	Hs.478429	gb:AK093727.1 /DB_XREF=gi:21752654 /TID=Hs2.75478.5 /CNT=1 /FEA=mRNA /TIER=ConsEnd /STK=0 /LL=23200 /UG_GENE=ATP11B /UG=Hs.75478 /UG_TITLE=ATPase, Class VI, type 11B /DEF=Homo sapiens cDNA FLJ36408 fis, clone THYMU2010094, highly similar to POTENTIAL PHOSPHOLIPID-TRANSPORTING ATPASE IR (EC 3.6.1.-).
TP53I11	6.24779e-10	4.49721e-12	1.5253	0.609095	1.5253	up	1.34754	0.430327	1.34754	up	1.4038	0.489335	1.4038	up	1.83789	0.878052	1.83789	up	1.43523	0.521286	1.43523	up	1.8294	0.871369	1.8294	up	2.15055	1.10471	2.15055	up		9537	Hs.554791	gb:AK026607.1 /DB_XREF=gi:10439496 /FEA=mRNA /CNT=65 /TID=Hs.96908.3 /TIER=ConsEnd /STK=0 /UG=Hs.96908 /LL=9537 /UG_GENE=PIG11 /UG_TITLE=p53-induced protein /DEF=Homo sapiens cDNA: FLJ22954 fis, clone KAT09813, highly similar to AF010315 Homo sapiens Pig11 (PIG11) mRNA.
	6.24779e-10	4.50229e-12	-1.92532	-0.945098	1.92532	down	-1.60842	-0.685645	1.60842	down	-1.82045	-0.864294	1.82045	down	-2.44893	-1.29215	2.44893	down	-1.86214	-0.89696	1.86214	down	-2.52538	-1.3365	2.52538	down	-2.41541	-1.27227	2.41541	down			Hs.252040	gb:CA425190 /DB_XREF=gi:24787916 /DB_XREF=UI-H-DF0-bel-k-01-0-UI.s1 /CLONE=UI-H-DF0-bel-k-01-0-UI /TID=Hs2.203743.1 /CNT=5 /FEA=mRNA /TIER=ConsEnd /STK=3 /UG=Hs.203743 /UG_TITLE=Homo sapiens cDNA FLJ36234 fis, clone THYMU2001314.
FCGR1A///FCGR1C	6.3334e-10	4.57557e-12	5.15549	2.36611	5.15549	up	5.27706	2.39973	5.27706	up	3.51987	1.81552	3.51987	up	6.4634	2.69229	6.4634	up	4.08509	2.03037	4.08509	up	6.65034	2.73343	6.65034	up	6.09706	2.60811	6.09706	up		2209///100132417	Hs.635062///Hs.77424	gb:X14355.1 /DB_XREF=gi:31333 /FEA=mRNA /CNT=1 /TID=Hs.77424.2 /TIER=ConsEnd /STK=0 /UG=Hs.77424 /LL=2209 /UG_GENE=FCGR1A /UG_TITLE=Fc fragment of IgG, high affinity Ia, receptor for (CD64) /DEF=Human mRNA for high affinity Fc receptor (FcRI) b form.
ZCCHC18	6.54535e-10	4.74066e-12	-1.26405	-0.338053	1.26405	down	-1.49901	-0.584007	1.49901	down	-1.38462	-0.469491	1.38462	down	-1.46074	-0.546696	1.46074	down	-1.28563	-0.362481	1.28563	down	-1.59492	-0.673484	1.59492	down	-1.58266	-0.662355	1.58266	down		644353	Hs.648338	gb:BF446577 /DB_XREF=gi:11511715 /DB_XREF=7q89c06.x1 /CLONE=IMAGE:3705586 /FEA=EST /CNT=21 /TID=Hs.110168.0 /TIER=Stack /STK=20 /UG=Hs.110168 /UG_TITLE=ESTs
EHD1	6.67518e-10	4.8469e-12	1.37276	0.457078	1.37276	up	1.34719	0.42995	1.34719	up	1.50085	0.585781	1.50085	up	1.94934	0.962985	1.94934	up	1.80329	0.850628	1.80329	up	1.98038	0.985781	1.98038	up	2.55587	1.35382	2.55587	up		10938	Hs.523774	gb:AL579035 /DB_XREF=gi:12943682 /DB_XREF=AL579035 /CLONE=CS0DK012YB08 (3 prime) /FEA=FLmRNA /CNT=263 /TID=Hs.155119.1 /TIER=Stack /STK=8 /UG=Hs.155119 /LL=10938 /UG_GENE=EHD1 /UG_TITLE=EH domain containing 1 /FL=gb:AF001434.1
	7.07154e-10	5.14764e-12	-2.20795	-1.14271	2.20795	down	-2.29174	-1.19645	2.29174	down	-1.92625	-0.945796	1.92625	down	-2.42219	-1.27631	2.42219	down	-1.57436	-0.654762	1.57436	down	-2.47159	-1.30544	2.47159	down	-2.28578	-1.19269	2.28578	down			Hs.161254	gb:AI419968 /DB_XREF=gi:4265899 /DB_XREF=tg53c05.x1 /CLONE=IMAGE:2112488 /TID=Hs2.161254.1 /CNT=2 /FEA=mRNA /TIER=ConsEnd /STK=1 /UG=Hs.161254 /UG_TITLE=Homo sapiens cDNA FLJ36285 fis, clone THYMU2003470.
KPNA5	7.09961e-10	5.18106e-12	-2.44998	-1.29277	2.44998	down	-2.41839	-1.27405	2.41839	down	-2.24762	-1.1684	2.24762	down	-3.14131	-1.65137	3.14131	down	-2.26716	-1.18089	2.26716	down	-3.6295	-1.85977	3.6295	down	-4.14397	-2.05101	4.14397	down		3841		gb:AI769559 /DB_XREF=gi:5236068 /DB_XREF=wj24e04.x1 /CLONE=IMAGE:2403774 /FEA=EST /CNT=24 /TID=Hs.24252.0 /TIER=Stack /STK=13 /UG=Hs.24252 /UG_TITLE=ESTs
SSBP2	7.17339e-10	5.24802e-12	-2.10234	-1.07199	2.10234	down	-2.02641	-1.01893	2.02641	down	-1.70532	-0.770042	1.70532	down	-1.96041	-0.971157	1.96041	down	-1.60571	-0.683208	1.60571	down	-2.57029	-1.36193	2.57029	down	-2.12378	-1.08663	2.12378	down		23635	Hs.102735	gb:NM_012446.1 /DB_XREF=gi:7106422 /GEN=SSBP2 /FEA=FLmRNA /CNT=112 /TID=Hs.169833.0 /TIER=FL+Stack /STK=43 /UG=Hs.169833 /LL=23635 /DEF=Homo sapiens single-stranded-DNA-binding protein (SSBP2), mRNA. /PROD=single-stranded-DNA-binding protein /FL=gb:AL080076.1 gb:AF161465.1 gb:NM_012446.1
GGT1///GGT2///GGT3P///GGTLC1///GGTLC2///GGTLC3///LOC102724197///LOC102724823	7.21648e-10	5.29274e-12	1.1735	0.230813	1.1735	up	1.1462	0.196861	1.1462	up	1.05708	0.0800908	1.05708	up	1.30871	0.388148	1.30871	up	1.24676	0.318181	1.24676	up	1.46256	0.548491	1.46256	up	1.54488	0.627496	1.54488	up		2678///2679///91227///92086///728226///728441///102724197///102724823	Hs.568255///Hs.595809///Hs.645535	gb:AI344075 /DB_XREF=gi:4081281 /DB_XREF=tb87f08.x1 /CLONE=IMAGE:2061351 /FEA=mRNA /CNT=6 /TID=Hs.289098.0 /TIER=ConsEnd /STK=0 /UG=Hs.289098 /LL=2679 /UG_GENE=GGT2 /UG_TITLE=gamma-glutamyltransferase 2
IL17RA	7.2794e-10	5.3522e-12	1.90371	0.928815	1.90371	up	2.24817	1.16875	2.24817	up	1.92797	0.947081	1.92797	up	2.38199	1.25217	2.38199	up	1.97577	0.982415	1.97577	up	2.19017	1.13105	2.19017	up	2.78635	1.47838	2.78635	up		23765	Hs.48353	gb:NM_014339.1 /DB_XREF=gi:7657229 /GEN=IL17R /FEA=FLmRNA /CNT=23 /TID=Hs.129751.0 /TIER=FL /STK=0 /UG=Hs.129751 /LL=23765 /DEF=Homo sapiens interleukin 17 receptor (IL17R), mRNA. /PROD=interleukin 17 receptor /FL=gb:U58917.1 gb:NM_014339.1
KMT5A	7.50208e-10	5.52966e-12	1.20252	0.266057	1.20252	up	1.20941	0.274306	1.20941	up	1.19677	0.259149	1.19677	up	1.31029	0.389886	1.31029	up	1.24037	0.310766	1.24037	up	1.45302	0.539057	1.45302	up	1.46115	0.547108	1.46115	up		387893	Hs.443735	gb:AL578116 /DB_XREF=gi:12941881 /DB_XREF=AL578116 /CLONE=CS0DK003YG13 (3 prime) /FEA=EST /CNT=177 /TID=Hs.111988.2 /TIER=Stack /STK=37 /UG=Hs.111988 /LL=57108 /UG_GENE=SET07 /UG_TITLE=PRSET domain containing protein 07
CRTAM	7.60338e-10	5.61822e-12	-2.39172	-1.25805	2.39172	down	-2.29438	-1.1981	2.29438	down	-2.0921	-1.06495	2.0921	down	-2.66912	-1.41637	2.66912	down	-1.85108	-0.888367	1.85108	down	-3.12948	-1.64592	3.12948	down	-3.154	-1.65718	3.154	down		56253	Hs.159523	gb:NM_019604.1 /DB_XREF=gi:9624976 /GEN=CRTAM /FEA=FLmRNA /CNT=9 /TID=Hs.159523.0 /TIER=FL /STK=0 /UG=Hs.159523 /LL=56253 /DEF=Homo sapiens class-I MHC-restricted T cell associated molecule (CRTAM), mRNA. /PROD=class-I MHC-restricted T cell associatedmolecule /FL=gb:AF001622.1 gb:NM_019604.1
CYP1B1	7.61544e-10	5.65921e-12	5.84472	2.54713	5.84472	up	9.56507	3.25778	9.56507	up	4.95365	2.30849	4.95365	up	5.47516	2.4529	5.47516	up	3.7776	1.91747	3.7776	up	6.63704	2.73054	6.63704	up	7.10076	2.82797	7.10076	up		1545	Hs.154654	gb:AU144855 /DB_XREF=gi:11006376 /DB_XREF=AU144855 /CLONE=HEMBA1003161 /FEA=FLmRNA /CNT=212 /TID=Hs.154654.0 /TIER=Stack /STK=22 /UG=Hs.154654 /LL=1545 /UG_GENE=CYP1B1 /UG_TITLE=cytochrome P450, subfamily I (dioxin-inducible), polypeptide 1 (glaucoma 3, primary infantile) /FL=gb:U03688.1 gb:NM_000104.2
USB1	7.61544e-10	5.64239e-12	1.32456	0.40551	1.32456	up	1.31379	0.393735	1.31379	up	1.25263	0.324961	1.25263	up	1.47989	0.565492	1.47989	up	1.25818	0.331334	1.25818	up	1.57443	0.654832	1.57443	up	1.66704	0.737291	1.66704	up		79650	Hs.408702	gb:NM_024598.1 /DB_XREF=gi:13375796 /GEN=FLJ13154 /FEA=FLmRNA /CNT=143 /TID=Hs.25303.0 /TIER=FL+Stack /STK=65 /UG=Hs.25303 /LL=79650 /DEF=Homo sapiens hypothetical protein FLJ13154 (FLJ13154), mRNA. /PROD=hypothetical protein FLJ13154 /FL=gb:NM_024598.1 gb:BC004415.1
RARA-AS1	7.61544e-10	5.66892e-12	1.99804	0.998584	1.99804	up	1.85122	0.888476	1.85122	up	1.69013	0.757134	1.69013	up	2.12325	1.08627	2.12325	up	1.81925	0.863344	1.81925	up	2.24475	1.16655	2.24475	up	2.40558	1.26638	2.40558	up		101929693	Hs.655717	gb:AA404273 /DB_XREF=gi:2058997 /DB_XREF=zv63d08.s1 /CLONE=IMAGE:758319 /FEA=EST /CNT=36 /TID=Hs.12974.0 /TIER=Stack /STK=32 /UG=Hs.12974 /UG_TITLE=ESTs
BCL3	7.69243e-10	5.7403e-12	1.94603	0.960532	1.94603	up	1.64688	0.719736	1.64688	up	1.5268	0.61051	1.5268	up	2.17099	1.11835	2.17099	up	1.80323	0.850585	1.80323	up	2.36933	1.24448	2.36933	up	2.5741	1.36407	2.5741	up		602	Hs.31210	gb:NM_005178.1 /DB_XREF=gi:4885086 /GEN=BCL3 /FEA=FLmRNA /CNT=53 /TID=Hs.31210.0 /TIER=FL+Stack /STK=8 /UG=Hs.31210 /LL=602 /DEF=Homo sapiens B-cell CLLlymphoma 3 (BCL3), mRNA. /PROD=B-cell CLLlymphoma 3 /FL=gb:NM_005178.1 gb:M31732.1
TC2N	7.7086e-10	5.76647e-12	-2.85016	-1.51104	2.85016	down	-3.33369	-1.73712	3.33369	down	-2.38632	-1.25479	2.38632	down	-3.35886	-1.74797	3.35886	down	-1.95872	-0.969911	1.95872	down	-3.35513	-1.74637	3.35513	down	-3.49861	-1.80678	3.49861	down		123036	Hs.510262	gb:NM_152332.1 /DB_XREF=gi:22748724 /TID=Hs2.57787.1 /CNT=23 /FEA=FLmRNA /TIER=FL /STK=1 /LL=123036 /UG_GENE=C14orf47 /UG=Hs.57787 /UG_TITLE=chromosome 14 open reading frame 47 /DEF=Homo sapiens chromosome 14 open reading frame 47 (C14orf47), mRNA. /FL=gb:NM_152332.1
CNIH4	7.8387e-10	5.87813e-12	2.29494	1.19845	2.29494	up	1.83436	0.875279	1.83436	up	1.64627	0.719198	1.64627	up	2.15771	1.1095	2.15771	up	1.84261	0.881754	1.84261	up	2.52012	1.33349	2.52012	up	2.04104	1.0293	2.04104	up		29097	Hs.445890	gb:AA834560 /DB_XREF=gi:2908159 /DB_XREF=od63d12.s1 /CLONE=IMAGE:1372631 /FEA=EST /CNT=22 /TID=Hs.108854.2 /TIER=Stack /STK=8 /UG=Hs.108854 /LL=29097 /UG_GENE=HSPC163 /UG_TITLE=HSPC163 protein
CYP2U1	7.87025e-10	5.91618e-12	-1.60454	-0.682164	1.60454	down	-2.01605	-1.01153	2.01605	down	-1.69736	-0.763293	1.69736	down	-2.061	-1.04334	2.061	down	-1.55499	-0.636903	1.55499	down	-2.23263	-1.15874	2.23263	down	-2.34736	-1.23104	2.34736	down		113612	Hs.109087	gb:AK026498.1 /DB_XREF=gi:10439372 /FEA=mRNA /CNT=81 /TID=Hs.109087.0 /TIER=Stack /STK=19 /UG=Hs.109087 /UG_TITLE=Homo sapiens cDNA: FLJ22845 fis, clone KAIA5195 /DEF=Homo sapiens cDNA: FLJ22845 fis, clone KAIA5195.
	7.93351e-10	5.97825e-12	2.57398	1.364	2.57398	up	3.54754	1.82682	3.54754	up	2.48506	1.31328	2.48506	up	3.11974	1.64142	3.11974	up	2.68338	1.42405	2.68338	up	3.39185	1.76207	3.39185	up	3.53633	1.82225	3.53633	up			Hs.605187	gb:AI452469 /DB_XREF=gi:4285829 /DB_XREF=tj62c12.x1 /CLONE=IMAGE:2146102 /FEA=EST /CNT=3 /TID=Hs.165221.0 /TIER=ConsEnd /STK=3 /UG=Hs.165221 /UG_TITLE=ESTs
TTC39B	7.94832e-10	6.00837e-12	-2.08457	-1.05975	2.08457	down	-2.04107	-1.02932	2.04107	down	-1.75738	-0.813423	1.75738	down	-2.48436	-1.31288	2.48436	down	-1.97407	-0.981171	1.97407	down	-2.51129	-1.32843	2.51129	down	-2.63385	-1.39718	2.63385	down		158219	Hs.732838	gb:AW001030 /DB_XREF=gi:5847946 /DB_XREF=wr91g06.x1 /CLONE=IMAGE:2495098 /FEA=mRNA /CNT=19 /TID=Hs.48919.0 /TIER=ConsEnd /STK=6 /UG=Hs.48919 /UG_TITLE=Homo sapiens cDNA FLJ11508 fis, clone HEMBA1002162
MGAT4A	7.94832e-10	6.01848e-12	-1.41774	-0.503595	1.41774	down	-1.4957	-0.580819	1.4957	down	-1.38246	-0.467243	1.38246	down	-1.50074	-0.585679	1.50074	down	-1.26347	-0.337387	1.26347	down	-1.50479	-0.589566	1.50479	down	-1.55295	-0.635013	1.55295	down		11320	Hs.177576	gb:BC031487.1 /DB_XREF=gi:21619288 /TID=Hs2.382603.1 /CNT=8 /FEA=mRNA /TIER=ConsEnd /STK=0 /UG=Hs.382603 /UG_TITLE=Homo sapiens, Similar to mannosyl (alpha-1,3-)-glycoprotein beta-1,4-N-acetylglucosaminyltransferase, isoenzyme A, clone IMAGE:4514877, mRNA /DEF=Homo sapiens, Similar to mannosyl (alpha-1,3-)-glycoprotein beta-1,4-N-acetylglucosaminyltransferase, isoenzyme A, clone IMAGE:4514877, mR…
CR1///CR1L	8.02701e-10	6.09274e-12	2.28243	1.19057	2.28243	up	2.54395	1.34707	2.54395	up	2.12795	1.08946	2.12795	up	2.32265	1.21577	2.32265	up	1.76934	0.823212	1.76934	up	2.65743	1.41003	2.65743	up	2.57355	1.36376	2.57355	up		1378///1379	Hs.334019///Hs.655194	gb:BE552138 /DB_XREF=gi:9793830 /DB_XREF=hw29d02.x1 /CLONE=IMAGE:3184323 /FEA=EST /CNT=9 /TID=Hs.89688.0 /TIER=ConsEnd /STK=4 /UG=Hs.89688 /UG_TITLE=ESTs, Highly similar to A34924 complement C3bC4b receptor-like protein precursor (H.sapiens)
MATK	8.02969e-10	6.10946e-12	-2.0778	-1.05505	2.0778	down	-1.81356	-0.858824	1.81356	down	-1.76992	-0.823687	1.76992	down	-2.05668	-1.04032	2.05668	down	-1.76185	-0.817088	1.76185	down	-2.02527	-1.01811	2.02527	down	-1.95738	-0.968924	1.95738	down		4145	Hs.631845	gb:NM_002378.1 /DB_XREF=gi:4505108 /GEN=MATK /FEA=FLmRNA /CNT=37 /TID=Hs.274.0 /TIER=FL /STK=7 /UG=Hs.274 /LL=4145 /DEF=Homo sapiens megakaryocyte-associated tyrosine kinase (MATK), mRNA. /PROD=megakaryocyte-associated tyrosine kinase /FL=gb:NM_002378.1 gb:BC000114.1 gb:L18974.1 gb:BC003109.1
TRMT61B	8.16739e-10	6.22918e-12	-1.86361	-0.898097	1.86361	down	-2.19401	-1.13357	2.19401	down	-1.75332	-0.810089	1.75332	down	-2.25286	-1.17176	2.25286	down	-1.59297	-0.671717	1.59297	down	-2.33927	-1.22606	2.33927	down	-2.50162	-1.32286	2.50162	down		55006	Hs.468026	gb:NM_017910.2 /DB_XREF=gi:13435382 /GEN=FLJ20628 /FEA=FLmRNA /CNT=1 /TID=HsAffx.900016.10 /TIER=FL /STK=0 /DEF=Homo sapiens hypothetical protein FLJ20628 (FLJ20628), mRNA. /PROD=hypothetical protein FLJ20628 /FL=gb:NM_017910.2
ZNF337	8.20606e-10	6.27368e-12	-1.33462	-0.416432	1.33462	down	-1.54202	-0.62482	1.54202	down	-1.29622	-0.374308	1.29622	down	-1.57023	-0.650976	1.57023	down	-1.28201	-0.358404	1.28201	down	-1.65983	-0.731033	1.65983	down	-1.7377	-0.797183	1.7377	down		26152	Hs.661684	gb:AL049942.1 /DB_XREF=gi:4884185 /GEN=DKFZp564F1422 /FEA=mRNA /CNT=18 /TID=Hs.139240.0 /TIER=ConsEnd /STK=0 /UG=Hs.139240 /LL=26152 /DEF=Homo sapiens mRNA; cDNA DKFZp564F1422 (from clone DKFZp564F1422). /PROD=hypothetical protein
RPL22	8.24311e-10	6.31708e-12	-2.36891	-1.24422	2.36891	down	-1.88156	-0.911926	1.88156	down	-1.73956	-0.79872	1.73956	down	-2.20072	-1.13798	2.20072	down	-1.7467	-0.804629	1.7467	down	-2.86596	-1.51902	2.86596	down	-2.53931	-1.34444	2.53931	down		6146	Hs.515329	gb:BE250348 /DB_XREF=gi:9120458 /DB_XREF=600943342T1 /CLONE=IMAGE:2959811 /FEA=mRNA /CNT=353 /TID=Hs.326249.1 /TIER=Stack /STK=17 /UG=Hs.326249 /UG_TITLE=Homo sapiens mRNA; cDNA DKFZp586E0524 (from clone DKFZp586E0524)
EIF2A	8.43298e-10	6.47801e-12	-1.80035	-0.84828	1.80035	down	-1.85046	-0.887886	1.85046	down	-1.62889	-0.703892	1.62889	down	-1.96097	-0.971566	1.96097	down	-1.55974	-0.641307	1.55974	down	-2.17628	-1.12186	2.17628	down	-2.48298	-1.31208	2.48298	down		83939	Hs.655782	gb:AF212241.1 /DB_XREF=gi:13182760 /FEA=FLmRNA /CNT=222 /TID=Hs.332404.0 /TIER=FL+Stack /STK=60 /UG=Hs.332404 /DEF=Homo sapiens CDA02 mRNA, complete cds. /PROD=CDA02 /FL=gb:AF212241.1
HIST1H2BD	8.47239e-10	6.52378e-12	1.74536	0.803526	1.74536	up	1.72144	0.783616	1.72144	up	1.68027	0.748695	1.68027	up	2.07501	1.05312	2.07501	up	1.98099	0.986222	1.98099	up	2.43001	1.28096	2.43001	up	2.32142	1.21501	2.32142	up		3017	Hs.591797	gb:AL353759 /DB_XREF=gi:8745068 /FEA=DNA_10 /CNT=12 /TID=Hs.180779.1 /TIER=Stack /STK=10 /UG=Hs.180779 /LL=3017 /UG_GENE=H2BFB /UG_TITLE=H2B histone family, member B /DEF=Human DNA sequence from clone RP1-221C16 on chromosome 6. Contains two genes for novel histone 4 family members, two genes for novel histone 1 family members, three genes for novel histone 2B family members, a gene for a novel h…
RTN1	8.50456e-10	6.56411e-12	-1.64391	-0.717131	1.64391	down	-1.61755	-0.693808	1.61755	down	-1.58847	-0.667636	1.58847	down	-1.55236	-0.634466	1.55236	down	-1.98089	-0.986148	1.98089	down	-2.20104	-1.13819	2.20104	down	-2.19699	-1.13553	2.19699	down		6252	Hs.368626	gb:BC000314.1 /DB_XREF=gi:12653096 /FEA=FLmRNA /CNT=50 /TID=Hs.99947.1 /TIER=FL /STK=0 /UG=Hs.99947 /LL=6252 /UG_GENE=RTN1 /DEF=Homo sapiens, Similar to reticulon 1, clone MGC:8436, mRNA, complete cds. /PROD=Similar to reticulon 1 /FL=gb:L10335.1 gb:BC000314.1 gb:BC003003.1
CAAP1	8.53076e-10	6.59993e-12	-1.67509	-0.744238	1.67509	down	-1.8527	-0.889633	1.8527	down	-1.53708	-0.620196	1.53708	down	-1.89666	-0.923463	1.89666	down	-1.46004	-0.546012	1.46004	down	-1.86225	-0.897047	1.86225	down	-1.97417	-0.981244	1.97417	down		79886	Hs.178357	gb:AF131768.1 /DB_XREF=gi:4406592 /FEA=mRNA /CNT=17 /TID=Hs.178357.2 /TIER=ConsEnd /STK=0 /UG=Hs.178357 /LL=79886 /UG_GENE=FLJ13657 /UG_TITLE=hypothetical protein FLJ13657 /DEF=Homo sapiens clone 25114 mRNA sequence.
SERPINB1	8.604e-10	6.67233e-12	3.50606	1.80985	3.50606	up	2.3659	1.24239	2.3659	up	2.30521	1.2049	2.30521	up	2.95388	1.56261	2.95388	up	2.28325	1.19109	2.28325	up	3.67175	1.87647	3.67175	up	2.88479	1.52846	2.88479	up		1992	Hs.381167	gb:AI554300 /DB_XREF=gi:4486663 /DB_XREF=tq05e07.x1 /CLONE=IMAGE:2207940 /FEA=EST /CNT=26 /TID=Hs.183583.1 /TIER=Stack /STK=23 /UG=Hs.183583 /LL=1992 /UG_GENE=SERPINB1 /UG_TITLE=serine (or cysteine) proteinase inhibitor, clade B (ovalbumin), member 1
SLC22A4	8.62239e-10	6.70236e-12	3.7047	1.88936	3.7047	up	3.19616	1.67634	3.19616	up	3.4354	1.78048	3.4354	up	3.97322	1.99031	3.97322	up	3.18815	1.67272	3.18815	up	3.15452	1.65742	3.15452	up	3.56243	1.83286	3.56243	up		6583	Hs.310591	gb:NM_003059.1 /DB_XREF=gi:4507002 /GEN=SLC22A4 /FEA=FLmRNA /CNT=30 /TID=Hs.77239.0 /TIER=FL+Stack /STK=17 /UG=Hs.77239 /LL=6583 /DEF=Homo sapiens solute carrier family 22 (organic cation transporter), member 4 (SLC22A4), mRNA. /PROD=solute carrier family 22 (organic cationtransporter), member 4 /FL=gb:NM_003059.1 gb:AB007448.1
CYLD	8.81209e-10	6.86594e-12	-1.86038	-0.895597	1.86038	down	-1.7402	-0.799256	1.7402	down	-1.6227	-0.698396	1.6227	down	-1.95417	-0.966553	1.95417	down	-1.66317	-0.733934	1.66317	down	-2.06968	-1.04941	2.06968	down	-2.05918	-1.04207	2.05918	down		1540	Hs.578973	Cluster Incl. AL050166:Homo sapiens mRNA; cDNA DKFZp586D1122 (from clone DKFZp586D1122) /cds=UNKNOWN /gb=AL050166 /gi=4884381 /ug=Hs.26295 /len=2654
FAM214A	8.93322e-10	6.97665e-12	-1.73697	-0.796574	1.73697	down	-2.44213	-1.28814	2.44213	down	-1.6112	-0.688137	1.6112	down	-2.22196	-1.15183	2.22196	down	-1.6125	-0.689295	1.6125	down	-2.50355	-1.32398	2.50355	down	-2.44615	-1.29051	2.44615	down		56204	Hs.152385	gb:AB037791.1 /DB_XREF=gi:7243120 /GEN=KIAA1370 /FEA=mRNA /CNT=93 /TID=Hs.29716.0 /TIER=Stack /STK=15 /UG=Hs.29716 /LL=56204 /DEF=Homo sapiens mRNA for KIAA1370 protein, partial cds. /PROD=KIAA1370 protein
CR1	9.01288e-10	7.05535e-12	2.93301	1.55238	2.93301	up	2.80042	1.48564	2.80042	up	2.88796	1.53005	2.88796	up	3.1615	1.66061	3.1615	up	2.11943	1.08367	2.11943	up	3.06905	1.61779	3.06905	up	3.3652	1.75069	3.3652	up		1378	Hs.334019	gb:NM_000651.1 /DB_XREF=gi:10834995 /GEN=CR1 /FEA=FLmRNA /CNT=2 /TID=Hs.193716.1 /TIER=FL /STK=0 /UG=Hs.193716 /LL=1378 /DEF=Homo sapiens complement component (3b4b) receptor 1, including Knops blood group system (CR1), mRNA. /PROD=complement component (3b4b) receptor 1,including Knops blood group system /FL=gb:NM_000651.1
CFAP97	9.13583e-10	7.16831e-12	-1.49694	-0.582015	1.49694	down	-1.37495	-0.45938	1.37495	down	-1.35028	-0.43326	1.35028	down	-1.43849	-0.524554	1.43849	down	-1.27852	-0.354478	1.27852	down	-1.41549	-0.501301	1.41549	down	-1.37834	-0.462929	1.37834	down		57587	Hs.535734	gb:AA868380 /DB_XREF=gi:2963825 /DB_XREF=ak41e02.s1 /CLONE=IMAGE:1408538 /FEA=mRNA /CNT=11 /TID=Hs.126914.0 /TIER=Stack /STK=8 /UG=Hs.126914 /LL=57587 /UG_GENE=KIAA1430 /UG_TITLE=KIAA1430 protein
UBAP1	9.21508e-10	7.24734e-12	1.80704	0.85363	1.80704	up	1.38667	0.471622	1.38667	up	1.61811	0.694308	1.61811	up	1.8026	0.85008	1.8026	up	1.63329	0.707783	1.63329	up	1.89116	0.919269	1.89116	up	2.00217	1.00157	2.00217	up		51271	Hs.268963	Cluster Incl. AL039447:DKFZp434N1010_s1 Homo sapiens cDNA, 3 end /clone=DKFZp434N1010 /clone_end=3' /gb=AL039447 /gi=5408497 /ug=Hs.75425 /len=841
GCC2	9.4477e-10	7.44757e-12	-1.72904	-0.789973	1.72904	down	-2.0071	-1.00512	2.0071	down	-1.78944	-0.83951	1.78944	down	-2.11214	-1.07871	2.11214	down	-1.92984	-0.948483	1.92984	down	-2.36375	-1.24107	2.36375	down	-2.65247	-1.40733	2.65247	down		9648	Hs.436505	gb:NM_014635.1 /DB_XREF=gi:7662061 /GEN=KIAA0336 /FEA=FLmRNA /CNT=133 /TID=Hs.278671.0 /TIER=FL+Stack /STK=44 /UG=Hs.278671 /LL=9648 /DEF=Homo sapiens KIAA0336 gene product (KIAA0336), mRNA. /PROD=KIAA0336 gene product /FL=gb:AB002334.1 gb:AF273042.1 gb:NM_014635.1
GOLGA8A	9.47704e-10	7.48803e-12	-2.45942	-1.29832	2.45942	down	-3.07534	-1.62074	3.07534	down	-2.30922	-1.20741	2.30922	down	-4.05567	-2.01994	4.05567	down	-2.51444	-1.33024	2.51444	down	-4.24578	-2.08603	4.24578	down	-4.59119	-2.19887	4.59119	down		23015	Hs.182982///Hs.720151	gb:AF204231.1 /DB_XREF=gi:6808610 /GEN=GM88 /FEA=FLmRNA /CNT=326 /TID=Hs.182982.0 /TIER=FL+Stack /STK=93 /UG=Hs.182982 /LL=23015 /DEF=Homo sapiens 88-kDa Golgi protein (GM88) mRNA, complete cds. /PROD=88-kDa Golgi protein /FL=gb:NM_015003.1 gb:AF204231.1
HLA-DPB1	9.71162e-10	7.69114e-12	-1.73281	-0.793114	1.73281	down	-1.91115	-0.934441	1.91115	down	-2.08274	-1.05848	2.08274	down	-1.87211	-0.904667	1.87211	down	-1.55279	-0.634863	1.55279	down	-2.10509	-1.07388	2.10509	down	-2.17103	-1.11838	2.17103	down		3115	Hs.485130	gb:AW402154 /DB_XREF=gi:6920840 /DB_XREF=UI-HF-BK0-aba-g-01-0-UI.r1 /CLONE=IMAGE:3055680 /FEA=EST /CNT=5 /TID=Hs.125812.0 /TIER=ConsEnd /STK=0 /UG=Hs.125812 /UG_TITLE=ESTs
ZNF606	9.74886e-10	7.73846e-12	-1.32498	-0.405969	1.32498	down	-1.39708	-0.482417	1.39708	down	-1.38734	-0.472321	1.38734	down	-1.51524	-0.599546	1.51524	down	-1.3443	-0.42685	1.3443	down	-1.59169	-0.670561	1.59169	down	-1.59732	-0.675655	1.59732	down		80095	Hs.654967	gb:AI817719 /DB_XREF=gi:5436798 /DB_XREF=wk25d10.x1 /CLONE=IMAGE:2413363 /FEA=EST /CNT=17 /TID=Hs.15574.0 /TIER=Stack /STK=11 /UG=Hs.15574 /UG_TITLE=ESTs
GLT1D1	9.77991e-10	7.781e-12	2.80904	1.49008	2.80904	up	2.38248	1.25246	2.38248	up	2.3478	1.23131	2.3478	up	3.13876	1.6502	3.13876	up	2.2349	1.16021	2.2349	up	2.84062	1.5062	2.84062	up	3.22351	1.68863	3.22351	up		144423	Hs.655668	gb:AI041543 /DB_XREF=gi:3280737 /DB_XREF=ov82c05.x1 /CLONE=IMAGE:1643816 /FEA=EST /CNT=24 /TID=Hs.12381.0 /TIER=Stack /STK=23 /UG=Hs.12381 /UG_TITLE=ESTs
TOMM20	9.85999e-10	7.86274e-12	-1.862	-0.896853	1.862	down	-2.19826	-1.13636	2.19826	down	-1.54799	-0.6304	1.54799	down	-2.01203	-1.00865	2.01203	down	-1.54752	-0.629957	1.54752	down	-2.38065	-1.25136	2.38065	down	-2.36057	-1.23914	2.36057	down		9804	Hs.533192	gb:NM_014765.1 /DB_XREF=gi:7657256 /GEN=KIAA0016 /FEA=FLmRNA /CNT=496 /TID=Hs.75187.0 /TIER=FL+Stack /STK=155 /UG=Hs.75187 /LL=9804 /DEF=Homo sapiens translocase of outer mitochondrial membrane 20 (yeast) homolog (KIAA0016), mRNA. /PROD=translocase of outer mitochondrial membrane 20(yeast) homolog /FL=gb:BC000882.1 gb:NM_014765.1 gb:D13641.1
SOCS3	9.96416e-10	8.00186e-12	1.65181	0.724051	1.65181	up	1.67334	0.742728	1.67334	up	1.29504	0.372994	1.29504	up	1.96361	0.973506	1.96361	up	1.40935	0.495026	1.40935	up	2.20892	1.14334	2.20892	up	2.06753	1.04791	2.06753	up		9021	Hs.527973	gb:BG035761 /DB_XREF=gi:12430218 /DB_XREF=602325844F1 /CLONE=IMAGE:4413754 /FEA=FLmRNA /CNT=15 /TID=Hs.296176.0 /TIER=ConsEnd /STK=0 /UG=Hs.296176 /LL=9021 /UG_GENE=SSI-3 /UG_TITLE=STAT induced STAT inhibitor 3 /FL=gb:NM_003955.1 gb:AF159854.1 gb:AB006967.1 gb:AB004904.1
FAM102A	9.96416e-10	8.01871e-12	-2.29806	-1.20041	2.29806	down	-1.85371	-0.890415	1.85371	down	-1.98564	-0.989604	1.98564	down	-2.33159	-1.22131	2.33159	down	-1.80811	-0.85448	1.80811	down	-2.53422	-1.34154	2.53422	down	-2.21139	-1.14495	2.21139	down		399665	Hs.535972	gb:AL043266 /DB_XREF=gi:5935844 /DB_XREF=DKFZp434L1423_s1 /CLONE=DKFZp434L1423 /FEA=mRNA /CNT=154 /TID=Hs.111334.4 /TIER=Stack /STK=67 /UG=Hs.111334 /LL=2512 /UG_GENE=FTL /UG_TITLE=ferritin, light polypeptide
PDLIM7	9.96416e-10	7.97542e-12	1.27064	0.345559	1.27064	up	1.44854	0.5346	1.44854	up	1.4713	0.557089	1.4713	up	1.82121	0.864901	1.82121	up	1.4917	0.576955	1.4917	up	1.70956	0.773625	1.70956	up	2.10593	1.07446	2.10593	up		9260	Hs.533040	gb:AW206786 /DB_XREF=gi:6506282 /DB_XREF=UI-H-BI1-afq-g-11-0-UI.s1 /CLONE=IMAGE:2722772 /FEA=EST /CNT=19 /TID=Hs.102948.2 /TIER=Stack /STK=18 /UG=Hs.102948 /LL=9260 /UG_GENE=ENIGMA /UG_TITLE=enigma (LIM domain protein)
DHRS9	9.96416e-10	7.9824e-12	3.3984	1.76485	3.3984	up	1.43128	0.517309	1.43128	up	1.74683	0.804738	1.74683	up	2.95872	1.56497	2.95872	up	2.08291	1.0586	2.08291	up	4.63849	2.21366	4.63849	up	3.25962	1.7047	3.25962	up		10170	Hs.179608	gb:AF240698.1 /DB_XREF=gi:9082138 /GEN=RDH /FEA=FLmRNA /CNT=4 /TID=Hs.306586.0 /TIER=FL /STK=0 /UG=Hs.306586 /DEF=Homo sapiens retinol dehydrogenase homolog isoform-1 (RDH) mRNA, complete cds. /PROD=retinol dehydrogenase homolog isoform-1 /FL=gb:AF240698.1
SSBP2	1.02997e-09	8.30754e-12	-1.5846	-0.66412	1.5846	down	-1.67116	-0.740847	1.67116	down	-1.44281	-0.528883	1.44281	down	-1.48447	-0.569952	1.48447	down	-1.3714	-0.455645	1.3714	down	-1.8481	-0.886045	1.8481	down	-1.64926	-0.721816	1.64926	down		23635	Hs.102735	gb:AF077048.1 /DB_XREF=gi:4689143 /FEA=FLmRNA /CNT=3 /TID=Hs.169833.1 /TIER=FL /STK=0 /UG=Hs.169833 /LL=23635 /UG_GENE=SSBP2 /DEF=Homo sapiens single strand DNA-binding protein mRNA, complete cds. /PROD=single strand DNA-binding protein /FL=gb:AF077048.1
ST6GAL1	1.04848e-09	8.47607e-12	-2.24789	-1.16857	2.24789	down	-2.09009	-1.06356	2.09009	down	-1.96003	-0.970874	1.96003	down	-2.23404	-1.15965	2.23404	down	-1.81864	-0.86286	1.81864	down	-2.58959	-1.37272	2.58959	down	-2.52725	-1.33757	2.52725	down		6480	Hs.207459	gb:AI743792 /DB_XREF=gi:5112080 /DB_XREF=wg53h11.x1 /CLONE=IMAGE:2368869 /FEA=FLmRNA /CNT=240 /TID=Hs.2554.0 /TIER=Stack /STK=107 /UG=Hs.2554 /LL=6480 /UG_GENE=SIAT1 /UG_TITLE=sialyltransferase 1 (beta-galactoside alpha-2,6-sialytransferase) /FL=gb:NM_003032.1
MAN1C1	1.06918e-09	8.66296e-12	-2.61063	-1.3844	2.61063	down	-2.14101	-1.09829	2.14101	down	-2.19711	-1.13561	2.19711	down	-2.89742	-1.53477	2.89742	down	-2.23681	-1.16144	2.23681	down	-3.15744	-1.65875	3.15744	down	-3.00501	-1.58737	3.00501	down		57134	Hs.197043	gb:NM_020379.1 /DB_XREF=gi:9966902 /GEN=HMIC /FEA=FLmRNA /CNT=96 /TID=Hs.8910.0 /TIER=FL /STK=0 /UG=Hs.8910 /LL=57134 /DEF=Homo sapiens 1,2-alpha-mannosidase IC (HMIC), mRNA. /PROD=1,2-alpha-mannosidase IC /FL=gb:AF261655.1 gb:NM_020379.1
ATM	1.09355e-09	8.88044e-12	-2.11468	-1.08044	2.11468	down	-2.48941	-1.31581	2.48941	down	-1.97414	-0.981221	1.97414	down	-2.68751	-1.42627	2.68751	down	-1.78293	-0.834246	1.78293	down	-2.84907	-1.51049	2.84907	down	-2.88497	-1.52856	2.88497	down		472	Hs.367437	gb:U82828 /DB_XREF=gi:2304970 /FEA=mRNA /CNT=113 /TID=Hs.194382.2 /TIER=Stack /STK=42 /UG=Hs.194382 /LL=472 /UG_GENE=ATM /UG_TITLE=ataxia telangiectasia mutated (includes complementation groups A, C and D) /DEF=Homo sapiens ataxia telangiectasia (ATM) gene, complete cds
SPI1	1.10528e-09	8.99587e-12	1.76936	0.823228	1.76936	up	1.83991	0.879639	1.83991	up	1.54431	0.626965	1.54431	up	2.50717	1.32606	2.50717	up	1.88936	0.917898	1.88936	up	2.35401	1.23512	2.35401	up	2.93923	1.55544	2.93923	up		6688	Hs.502511	gb:NM_003120.1 /DB_XREF=gi:4507174 /GEN=SPI1 /FEA=FLmRNA /CNT=48 /TID=Hs.157441.0 /TIER=FL+Stack /STK=20 /UG=Hs.157441 /LL=6688 /DEF=Homo sapiens spleen focus forming virus (SFFV) proviral integration oncogene spi1 (SPI1), mRNA. /PROD=spleen focus forming virus (SFFV) proviralintegration oncogene spi1 /FL=gb:NM_003120.1
HLA-DRA	1.11707e-09	9.11225e-12	-1.87196	-0.904551	1.87196	down	-1.71516	-0.778344	1.71516	down	-1.61482	-0.691378	1.61482	down	-1.66771	-0.737868	1.66771	down	-1.52417	-0.608026	1.52417	down	-2.81529	-1.49328	2.81529	down	-2.82976	-1.50068	2.82976	down		3122	Hs.520048	gb:M60334.1 /DB_XREF=gi:188255 /GEN=HLA-DRA /FEA=FLmRNA /CNT=470 /TID=Hs.76807.0 /TIER=FL /STK=0 /UG=Hs.76807 /LL=3122 /DEF=Human MHC class II HLA-DR-alpha mRNA, complete cds. /PROD=cell surface glycoprotein /FL=gb:M60334.1 gb:NM_019111.1
LTB4R	1.11849e-09	9.14429e-12	1.89254	0.920326	1.89254	up	1.77567	0.828365	1.77567	up	1.69083	0.757729	1.69083	up	2.62868	1.39434	2.62868	up	1.93087	0.949251	1.93087	up	2.78015	1.47516	2.78015	up	3.00533	1.58752	3.00533	up		1241	Hs.567248	gb:U41070.1 /DB_XREF=gi:1469913 /FEA=FLmRNA /CNT=19 /TID=Hs.28408.1 /TIER=FL+Stack /STK=11 /UG=Hs.28408 /LL=1241 /UG_GENE=LTB4R /DEF=Human P2 purinergic receptor mRNA, complete cds. /PROD=P2 purinergic receptor /FL=gb:D89079.1 gb:U41070.1
SH3GLB1	1.11938e-09	9.17206e-12	2.48297	1.31207	2.48297	up	1.95375	0.966248	1.95375	up	1.98697	0.990571	1.98697	up	2.72209	1.44471	2.72209	up	2.29068	1.19578	2.29068	up	2.74451	1.45655	2.74451	up	2.83022	1.50091	2.83022	up		51100	Hs.136309	gb:AF257318.1 /DB_XREF=gi:8896091 /FEA=FLmRNA /CNT=23 /TID=Hs.136309.1 /TIER=FL /STK=0 /UG=Hs.136309 /LL=51100 /UG_GENE=SH3GLB1 /DEF=Homo sapiens SH3-containing protein SH3GLB1 mRNA, complete cds. /PROD=SH3-containing protein SH3GLB1 /FL=gb:NM_016009.1 gb:AF350371.1 gb:AF151819.1 gb:AF257318.1
ST6GALNAC3	1.12382e-09	9.22898e-12	3.64076	1.86424	3.64076	up	2.96945	1.5702	2.96945	up	2.55877	1.35545	2.55877	up	3.02831	1.59851	3.02831	up	2.58679	1.37116	2.58679	up	3.76636	1.91317	3.76636	up	3.5412	1.82424	3.5412	up		256435	Hs.337040	gb:AW963951 /DB_XREF=gi:8153787 /DB_XREF=EST376024 /FEA=EST /CNT=13 /TID=Hs.85618.0 /TIER=ConsEnd /STK=0 /UG=Hs.85618 /UG_TITLE=ESTs
C6orf47	1.14456e-09	9.42208e-12	1.05581	0.0783454	1.05581	up	1.02758	0.0392483	1.02758	up	1.02433	0.0346751	1.02433	up	1.14872	0.200031	1.14872	up	1.11596	0.158289	1.11596	up	1.21665	0.282917	1.21665	up	1.25657	0.329497	1.25657	up		57827	Hs.247323	gb:NM_021184.1 /DB_XREF=gi:10863984 /GEN=G4 /FEA=FLmRNA /CNT=48 /TID=Hs.247323.0 /TIER=FL /STK=0 /UG=Hs.247323 /LL=57827 /DEF=Homo sapiens G4 protein (G4), mRNA. /PROD=G4 protein /FL=gb:NM_021184.1
PTPN4	1.14456e-09	9.44119e-12	-1.81808	-0.862417	1.81808	down	-2.23805	-1.16224	2.23805	down	-1.68135	-0.74962	1.68135	down	-2.40274	-1.26468	2.40274	down	-1.80779	-0.85423	1.80779	down	-2.32788	-1.21902	2.32788	down	-2.42723	-1.27931	2.42723	down		5775	Hs.469809	gb:AA088791 /DB_XREF=gi:1634364 /DB_XREF=zl90c04.s1 /CLONE=IMAGE:511878 /FEA=EST /CNT=6 /TID=Hs.26743.0 /TIER=ConsEnd /STK=6 /UG=Hs.26743 /UG_TITLE=ESTs
ALKBH8	1.17362e-09	9.70238e-12	-1.56614	-0.64721	1.56614	down	-1.92686	-0.946251	1.92686	down	-1.59403	-0.672683	1.59403	down	-1.77572	-0.828408	1.77572	down	-1.47245	-0.558214	1.47245	down	-1.78605	-0.836773	1.78605	down	-1.81759	-0.86203	1.81759	down		91801	Hs.503763	gb:AI590659 /DB_XREF=gi:4599707 /DB_XREF=tw87a10.x1 /CLONE=IMAGE:2266650 /FEA=EST /CNT=9 /TID=Hs.91559.0 /TIER=ConsEnd /STK=7 /UG=Hs.91559 /UG_TITLE=ESTs
HRH2	1.20523e-09	9.98572e-12	2.94552	1.55852	2.94552	up	3.57827	1.83926	3.57827	up	3.0365	1.60241	3.0365	up	3.81384	1.93124	3.81384	up	2.98519	1.57782	2.98519	up	3.52815	1.81891	3.52815	up	4.51929	2.1761	4.51929	up		3274		gb:AW139719 /DB_XREF=gi:6144437 /DB_XREF=UI-H-BI1-aeb-b-04-0-UI.s1 /CLONE=IMAGE:2718655 /FEA=EST /CNT=20 /TID=Hs.22223.0 /TIER=Stack /STK=14 /UG=Hs.22223 /UG_TITLE=ESTs
IL1RN	1.26527e-09	1.05295e-11	2.23209	1.1584	2.23209	up	3.20223	1.67908	3.20223	up	2.36444	1.2415	2.36444	up	3.17649	1.66743	3.17649	up	1.96566	0.97501	1.96566	up	3.28931	1.71779	3.28931	up	3.57023	1.83602	3.57023	up		3557	Hs.81134	gb:BE563442 /DB_XREF=gi:9807162 /DB_XREF=601335496F1 /CLONE=IMAGE:3689710 /FEA=mRNA /CNT=2 /TID=Hs.81134.2 /TIER=ConsEnd /STK=0 /UG=Hs.81134 /LL=3557 /UG_GENE=IL1RN /UG_TITLE=interleukin 1 receptor antagonist
2009-09-01	1.26527e-09	1.05459e-11	-1.79682	-0.845444	1.79682	down	-1.62809	-0.703183	1.62809	down	-1.58591	-0.665307	1.58591	down	-1.73623	-0.795954	1.73623	down	-1.47498	-0.560698	1.47498	down	-2.00842	-1.00606	2.00842	down	-1.74671	-0.804643	1.74671	down		10801	Hs.440932	Cluster Incl. AB023208:Homo sapiens mRNA for KIAA0991 protein, complete cds /cds=(732,2000) /gb=AB023208 /gi=4589625 /ug=Hs.181002 /len=3938
ZBTB7B	1.26527e-09	1.05526e-11	1.43734	0.523402	1.43734	up	1.35553	0.438853	1.35553	up	1.25469	0.327333	1.25469	up	1.66493	0.735464	1.66493	up	1.39289	0.47808	1.39289	up	1.70526	0.769993	1.70526	up	1.71972	0.782171	1.71972	up		51043	Hs.729279	gb:BE778059 /DB_XREF=gi:10199257 /DB_XREF=601463167F1 /CLONE=IMAGE:3866489 /FEA=EST /CNT=16 /TID=Hs.184814.0 /TIER=ConsEnd /STK=0 /UG=Hs.184814 /UG_TITLE=ESTs
PKM	1.27072e-09	1.06213e-11	1.34488	0.427473	1.34488	up	1.8265	0.869081	1.8265	up	1.41547	0.501283	1.41547	up	2.05747	1.04087	2.05747	up	1.909	0.932819	1.909	up	2.28067	1.18946	2.28067	up	2.86807	1.52008	2.86807	up		5315	Hs.534770///Hs.637588	gb:NM_002654.1 /DB_XREF=gi:4505838 /GEN=PKM2 /FEA=FLmRNA /CNT=473 /TID=Hs.198281.0 /TIER=FL /STK=0 /UG=Hs.198281 /LL=5315 /DEF=Homo sapiens pyruvate kinase, muscle (PKM2), mRNA. /PROD=pyruvate kinase, muscle /FL=gb:NM_002654.1 gb:BC000481.1 gb:M26252.1 gb:M23725.1
LOC100506076///LOC100506123	1.30184e-09	1.09053e-11	-1.47667	-0.562347	1.47667	down	-1.63575	-0.709952	1.63575	down	-1.49473	-0.579881	1.49473	down	-1.69186	-0.758614	1.69186	down	-1.43565	-0.521703	1.43565	down	-1.82912	-0.871148	1.82912	down	-1.89446	-0.921784	1.89446	down		100506076///100506123	Hs.720604	gb:AI983904 /DB_XREF=gi:5811123 /DB_XREF=wz55d05.x1 /CLONE=IMAGE:2561961 /FEA=EST /CNT=27 /TID=Hs.79732.5 /TIER=Stack /STK=25 /UG=Hs.79732 /LL=2192 /UG_GENE=FBLN1 /UG_TITLE=fibulin 1
IL1RN	1.31918e-09	1.10987e-11	2.47042	1.30476	2.47042	up	2.98743	1.57891	2.98743	up	2.12462	1.0872	2.12462	up	3.05087	1.60922	3.05087	up	2.02851	1.02042	2.02851	up	3.54676	1.8265	3.54676	up	3.44943	1.78636	3.44943	up		3557	Hs.81134	gb:U65590 /DB_XREF=gi:2707374 /FEA=mRNA /CNT=107 /TID=Hs.81134.0 /TIER=Stack /STK=35 /UG=Hs.81134 /LL=3557 /UG_GENE=IL1RN /UG_TITLE=interleukin 1 receptor antagonist /DEF=Homo sapiens IL-1 receptor antagonist IL-1Ra (IL-1RN) gene, alternatively spliced forms, complete cds
MS4A4A	1.31918e-09	1.10764e-11	4.32808	2.11373	4.32808	up	3.24718	1.69919	3.24718	up	2.50583	1.32529	2.50583	up	3.27107	1.70976	3.27107	up	2.89952	1.53581	2.89952	up	5.89281	2.55896	5.89281	up	5.18168	2.37342	5.18168	up		51338	Hs.325960	gb:AF354928.1 /DB_XREF=gi:15808758 /TID=Hs2.325960.4 /CNT=1 /FEA=FLmRNA /TIER=FL /STK=1 /LL=51338 /UG_GENE=MS4A4A /UG=Hs.325960 /DEF=Homo sapiens MS4A4A protein mRNA, complete cds, alternatively spliced. /PROD=MS4A4A protein /FL=gb:AF354928.1
ARMCX5	1.32203e-09	1.11469e-11	-1.60385	-0.681538	1.60385	down	-2.24057	-1.16387	2.24057	down	-1.65801	-0.729449	1.65801	down	-2.04105	-1.02931	2.04105	down	-1.66511	-0.73562	1.66511	down	-2.17005	-1.11773	2.17005	down	-2.34475	-1.22943	2.34475	down		64860	Hs.522729	gb:NM_022838.1 /DB_XREF=gi:12383085 /GEN=FLJ12969 /FEA=FLmRNA /CNT=45 /TID=Hs.119699.0 /TIER=FL+Stack /STK=26 /UG=Hs.119699 /LL=64860 /DEF=Homo sapiens hypothetical protein FLJ12969 (FLJ12969), mRNA. /PROD=hypothetical protein FLJ12969 /FL=gb:NM_022838.1
CD55	1.34315e-09	1.13495e-11	2.83131	1.50147	2.83131	up	2.42213	1.27628	2.42213	up	1.98949	0.992397	1.98949	up	2.70533	1.43581	2.70533	up	2.08422	1.05951	2.08422	up	3.03909	1.60364	3.03909	up	2.73232	1.45013	2.73232	up		1604	Hs.126517	gb:BC001288.1 /DB_XREF=gi:12654888 /FEA=FLmRNA /CNT=314 /TID=Hs.1369.0 /TIER=FL /STK=0 /UG=Hs.1369 /LL=1604 /UG_GENE=DAF /DEF=Homo sapiens, Similar to decay accelerating factor for complement (CD55, Cromer blood group system), clone MGC:5192, mRNA, complete cds. /PROD=Similar to decay accelerating factor forcomplement (CD55, Cromer blood group system) /FL=gb:BC001288.1 gb:M31516.1 gb:NM_000574.1
FNDC3B	1.34621e-09	1.14077e-11	3.64412	1.86557	3.64412	up	3.25967	1.70473	3.25967	up	2.71249	1.43962	2.71249	up	3.30245	1.72354	3.30245	up	2.75659	1.46288	2.75659	up	4.16232	2.05739	4.16232	up	3.54734	1.82674	3.54734	up		64778	Hs.744888	gb:BF444916 /DB_XREF=gi:11510054 /DB_XREF=nad19a09.x1 /CLONE=IMAGE:3365681 /FEA=FLmRNA /CNT=82 /TID=Hs.299883.0 /TIER=Stack /STK=13 /UG=Hs.299883 /LL=64778 /UG_GENE=FLJ23399 /UG_TITLE=hypothetical protein FLJ23399 /FL=gb:NM_022763.1
IL17RA	1.34621e-09	1.14246e-11	1.92162	0.942319	1.92162	up	2.62448	1.39203	2.62448	up	2.12308	1.08616	2.12308	up	2.5104	1.32792	2.5104	up	2.0042	1.00303	2.0042	up	2.4553	1.2959	2.4553	up	2.90626	1.53917	2.90626	up		23765	Hs.48353	gb:BF939473 /DB_XREF=gi:12356793 /DB_XREF=nac76d11.x1 /CLONE=IMAGE:3440301 /FEA=EST /CNT=12 /TID=Hs.48353.0 /TIER=Stack /STK=8 /UG=Hs.48353 /UG_TITLE=ESTs
ZMAT3	1.35208e-09	1.14992e-11	-1.94634	-0.960764	1.94634	down	-2.09112	-1.06428	2.09112	down	-1.68208	-0.750246	1.68208	down	-2.14759	-1.10272	2.14759	down	-1.7263	-0.787685	1.7263	down	-2.30414	-1.20423	2.30414	down	-2.31321	-1.2099	2.31321	down		64393	Hs.371609	gb:AL533234 /DB_XREF=gi:12796727 /DB_XREF=AL533234 /CLONE=CS0DN003YO15 (3 prime) /FEA=EST /CNT=74 /TID=Hs.26418.0 /TIER=Stack /STK=32 /UG=Hs.26418 /UG_TITLE=ESTs
HGF	1.3716e-09	1.16949e-11	4.76405	2.25219	4.76405	up	1.7639	0.818766	1.7639	up	1.73842	0.797779	1.73842	up	3.15677	1.65845	3.15677	up	2.06107	1.04339	2.06107	up	4.7229	2.23967	4.7229	up	2.63948	1.40025	2.63948	up		3082		gb:X16323.1 /DB_XREF=gi:32081 /FEA=FLmRNA /CNT=42 /TID=Hs.809.0 /TIER=Stack /STK=8 /UG=Hs.809 /LL=3082 /UG_GENE=HGF /UG_TITLE=hepatocyte growth factor (hepapoietin A; scatter factor) /DEF=Human mRNA for hepatocyte growth factor (HGF). /FL=gb:M73240.1 gb:M73239.1 gb:M60718.1 gb:M29145.1
TMEM161B-AS1	1.3716e-09	1.17154e-11	-1.20701	-0.271443	1.20701	down	-1.2115	-0.276793	1.2115	down	-1.22575	-0.293669	1.22575	down	-1.34496	-0.42756	1.34496	down	-1.21703	-0.283368	1.21703	down	-1.36898	-0.453099	1.36898	down	-1.44603	-0.532098	1.44603	down		100505894	Hs.559426	gb:BF512190 /DB_XREF=gi:11597369 /DB_XREF=UI-H-BI3-alq-c-12-0-UI.s1 /CLONE=IMAGE:3068182 /FEA=EST /CNT=12 /TID=Hs.139135.0 /TIER=ConsEnd /STK=1 /UG=Hs.139135 /UG_TITLE=ESTs
PFKFB2	1.37182e-09	1.17423e-11	5.03305	2.33143	5.03305	up	1.50004	0.585	1.50004	up	1.86536	0.899458	1.86536	up	3.07584	1.62098	3.07584	up	2.27981	1.18891	2.27981	up	4.95139	2.30783	4.95139	up	3.66916	1.87545	3.66916	up		5208	Hs.282702	gb:AA587884 /DB_XREF=gi:2402059 /DB_XREF=nm71a06.s1 /CLONE=IMAGE:1073650 /FEA=EST /CNT=34 /TID=Hs.184389.0 /TIER=Stack /STK=16 /UG=Hs.184389 /UG_TITLE=ESTs
	1.38895e-09	1.19144e-11	-1.35895	-0.442491	1.35895	down	-1.70069	-0.766116	1.70069	down	-1.4303	-0.516318	1.4303	down	-1.74128	-0.800146	1.74128	down	-1.40947	-0.495155	1.40947	down	-1.73566	-0.795486	1.73566	down	-1.76986	-0.823637	1.76986	down				gb:AA992936 /DB_XREF=gi:3179481 /DB_XREF=ou01b08.s1 /CLONE=IMAGE:1624983 /FEA=EST /CNT=10 /TID=Hs.121655.0 /TIER=ConsEnd /STK=4 /UG=Hs.121655 /UG_TITLE=ESTs
SRSF11	1.41714e-09	1.21821e-11	-1.93828	-0.954775	1.93828	down	-2.6234	-1.39144	2.6234	down	-1.78148	-0.83308	1.78148	down	-2.58455	-1.36991	2.58455	down	-1.92774	-0.946912	1.92774	down	-2.7305	-1.44917	2.7305	down	-3.21017	-1.68265	3.21017	down		9295	Hs.479693	gb:AU146237 /DB_XREF=gi:11007758 /DB_XREF=AU146237 /CLONE=HEMBA1007233 /FEA=FLmRNA /CNT=411 /TID=Hs.11482.0 /TIER=Stack /STK=15 /UG=Hs.11482 /LL=9295 /UG_GENE=SFRS11 /UG_TITLE=splicing factor, arginineserine-rich 11 /FL=gb:M74002.1 gb:NM_004768.1
LCN2	1.41876e-09	1.2222e-11	7.31056	2.86998	7.31056	up	5.55101	2.47275	5.55101	up	4.47523	2.16196	4.47523	up	5.79082	2.53377	5.79082	up	7.79149	2.9619	7.79149	up	14.7408	3.88174	14.7408	up	10.8804	3.44367	10.8804	up		3934	Hs.204238	gb:NM_005564.1 /DB_XREF=gi:5031852 /GEN=LCN2 /FEA=FLmRNA /CNT=166 /TID=Hs.204238.0 /TIER=FL+Stack /STK=71 /UG=Hs.204238 /LL=3934 /DEF=Homo sapiens lipocalin 2 (oncogene 24p3) (LCN2), mRNA. /PROD=lipocalin 2 (oncogene 24p3) /FL=gb:NM_005564.1
ABHD10	1.42178e-09	1.22802e-11	-1.46843	-0.554275	1.46843	down	-1.43259	-0.51863	1.43259	down	-1.40856	-0.494221	1.40856	down	-1.6826	-0.750691	1.6826	down	-1.39869	-0.484073	1.39869	down	-1.83341	-0.87453	1.83341	down	-1.93759	-0.95426	1.93759	down		55347	Hs.477115	gb:NM_018394.1 /DB_XREF=gi:8923000 /GEN=FLJ11342 /FEA=FLmRNA /CNT=69 /TID=Hs.266514.0 /TIER=FL /STK=0 /UG=Hs.266514 /LL=55347 /DEF=Homo sapiens hypothetical protein FLJ11342 (FLJ11342), mRNA. /PROD=hypothetical protein FLJ11342 /FL=gb:NM_018394.1
TMEM63A	1.42178e-09	1.23e-11	-1.69286	-0.759459	1.69286	down	-1.83025	-0.872042	1.83025	down	-1.51588	-0.600152	1.51588	down	-1.63225	-0.706859	1.63225	down	-1.40585	-0.491442	1.40585	down	-1.73713	-0.796702	1.73713	down	-1.6459	-0.718876	1.6459	down		9725		gb:AI491983 /DB_XREF=gi:4392986 /DB_XREF=to07e03.x1 /CLONE=IMAGE:2178364 /FEA=EST /CNT=28 /TID=Hs.322704.0 /TIER=Stack /STK=14 /UG=Hs.322704 /UG_TITLE=ESTs
TRAK1	1.43058e-09	1.24023e-11	-1.21404	-0.279818	1.21404	down	-1.44667	-0.532737	1.44667	down	-1.27159	-0.346631	1.27159	down	-1.3563	-0.439681	1.3563	down	-1.34557	-0.428214	1.34557	down	-1.46184	-0.547787	1.46184	down	-1.42789	-0.513885	1.42789	down		22906	Hs.535711	gb:NM_014965.1 /DB_XREF=gi:7662457 /GEN=KIAA1042 /FEA=FLmRNA /CNT=178 /TID=Hs.6705.0 /TIER=FL+Stack /STK=52 /UG=Hs.6705 /LL=22906 /DEF=Homo sapiens KIAA1042 protein (KIAA1042), mRNA. /PROD=KIAA1042 protein /FL=gb:AB028965.1 gb:NM_014965.1
ZFP36L2	1.45349e-09	1.26275e-11	-2.1254	-1.08774	2.1254	down	-2.11974	-1.08389	2.11974	down	-1.46685	-0.552723	1.46685	down	-1.9979	-0.998481	1.9979	down	-1.58349	-0.663107	1.58349	down	-2.53924	-1.3444	2.53924	down	-2.26554	-1.17986	2.26554	down		678	Hs.503093	gb:U07802 /DB_XREF=gi:984508 /FEA=FLmRNA /CNT=342 /TID=Hs.78909.0 /TIER=Stack /STK=115 /UG=Hs.78909 /LL=678 /UG_GENE=BRF2 /UG_TITLE=butyrate response factor 2 (EGF-response factor 2) /DEF=Human Tis11d gene, complete cds /FL=gb:BC005010.1 gb:NM_006887.1
FAM89A	1.46508e-09	1.2755e-11	1.74213	0.800852	1.74213	up	1.94244	0.957871	1.94244	up	1.5169	0.601129	1.5169	up	2.05183	1.03691	2.05183	up	1.8372	0.877506	1.8372	up	2.79532	1.48302	2.79532	up	2.89547	1.5338	2.89547	up		375061	Hs.38516	gb:AI130705 /DB_XREF=gi:3600721 /DB_XREF=qc12d05.x1 /CLONE=IMAGE:1709385 /FEA=EST /CNT=49 /TID=Hs.38516.1 /TIER=Stack /STK=8 /UG=Hs.38516 /UG_TITLE=ESTs, Weakly similar to A46302 PTB-associated splicing factor, long form (H.sapiens)
SRSF6	1.46768e-09	1.28045e-11	-1.75414	-0.810766	1.75414	down	-1.75907	-0.814814	1.75907	down	-1.59415	-0.672787	1.59415	down	-2.06349	-1.04509	2.06349	down	-1.55338	-0.635407	1.55338	down	-2.23701	-1.16157	2.23701	down	-2.2954	-1.19875	2.2954	down		6431	Hs.684950///Hs.725336	gb:AL031681 /DB_XREF=gi:10198606 /FEA=FLmRNA /CNT=291 /TID=Hs.6891.1 /TIER=Stack /STK=78 /UG=Hs.6891 /LL=6431 /UG_GENE=SFRS6 /UG_TITLE=splicing factor, arginineserine-rich 6 /DEF=Human DNA sequence from clone 862K6 on chromosome 20q12-13.13. Contains the gene for a protein similar to Drosophila lethal (3) malignant brain tumor (l(3)mbt) protein, the SFRS6 gene for arginineserine-rich splicing fac…
ZMAT1	1.55247e-09	1.35726e-11	-1.4984	-0.583423	1.4984	down	-2.40957	-1.26878	2.40957	down	-1.74027	-0.799308	1.74027	down	-2.1964	-1.13514	2.1964	down	-1.88657	-0.915763	1.88657	down	-2.55599	-1.35388	2.55599	down	-2.66299	-1.41305	2.66299	down		84460	Hs.496512	gb:AI741051 /DB_XREF=gi:5109339 /DB_XREF=wg25h03.x1 /CLONE=IMAGE:2366165 /FEA=EST /CNT=60 /TID=Hs.296317.0 /TIER=Stack /STK=12 /UG=Hs.296317 /UG_TITLE=ESTs, Weakly similar to AF208845 1 BM-003 (H.sapiens)
B4GALT5	1.57426e-09	1.37919e-11	2.87573	1.52393	2.87573	up	2.87028	1.52119	2.87028	up	2.73763	1.45293	2.73763	up	3.78481	1.92022	3.78481	up	3.07381	1.62003	3.07381	up	3.99223	1.9972	3.99223	up	4.02179	2.00784	4.02179	up		9334	Hs.370487	gb:AL035683 /DB_XREF=gi:7288039 /FEA=FLmRNA /CNT=236 /TID=Hs.107526.0 /TIER=Stack /STK=67 /UG=Hs.107526 /LL=9334 /UG_GENE=B4GALT5 /UG_TITLE=UDP-Gal:betaGlcNAc beta 1,4- galactosyltransferase, polypeptide 5 /DEF=Human DNA sequence from clone RP5-1063B2 on chromosome 20q13.1-13.2. Contains the 3 part of the gene for Beta-1,4-galactosyltransferase, ESTs, STSs and GSSs /FL=gb:AB004550.1 gb:NM_004776.…
LPIN1	1.58429e-09	1.39087e-11	-1.80784	-0.854271	1.80784	down	-1.89908	-0.925304	1.89908	down	-1.77727	-0.829664	1.77727	down	-2.12816	-1.0896	2.12816	down	-1.60948	-0.686599	1.60948	down	-2.27297	-1.18458	2.27297	down	-2.49283	-1.31779	2.49283	down		23175	Hs.467740	gb:D80010.1 /DB_XREF=gi:1136435 /GEN=KIAA0188 /FEA=mRNA /CNT=171 /TID=Hs.81412.0 /TIER=Stack /STK=32 /UG=Hs.81412 /LL=23175 /UG_TITLE=lipin 1 /DEF=Human mRNA for KIAA0188 gene, partial cds.
LDLR	1.60641e-09	1.41323e-11	1.34221	0.424606	1.34221	up	1.42161	0.507528	1.42161	up	1.48961	0.574936	1.48961	up	1.57727	0.657434	1.57727	up	1.79155	0.841212	1.79155	up	2.58022	1.36749	2.58022	up	2.24849	1.16896	2.24849	up		3949	Hs.713981	gb:NM_000527.2 /DB_XREF=gi:8051613 /GEN=LDLR /FEA=FLmRNA /CNT=162 /TID=Hs.213289.0 /TIER=FL+Stack /STK=39 /UG=Hs.213289 /LL=3949 /DEF=Homo sapiens low density lipoprotein receptor (familial hypercholesterolemia) (LDLR), mRNA. /PROD=low density lipoprotein receptor precursor /FL=gb:NM_000527.2
NAIP	1.66344e-09	1.46644e-11	2.64275	1.40204	2.64275	up	2.61815	1.38855	2.61815	up	2.15651	1.1087	2.15651	up	2.72083	1.44405	2.72083	up	1.78192	0.833436	1.78192	up	2.46732	1.30295	2.46732	up	2.62956	1.39482	2.62956	up		4671	Hs.654588	gb:AI970117 /DB_XREF=gi:5766943 /DB_XREF=wq89d05.x1 /CLONE=IMAGE:2479209 /FEA=EST /CNT=12 /TID=Hs.167726.0 /TIER=ConsEnd /STK=1 /UG=Hs.167726 /UG_TITLE=ESTs, Highly similar to A55478 neuronal apoptosis inhibitory protein (H.sapiens)
ARL4C	1.67899e-09	1.48322e-11	-3.4211	-1.77446	3.4211	down	-2.50947	-1.32738	2.50947	down	-2.40361	-1.2652	2.40361	down	-3.49004	-1.80324	3.49004	down	-2.28066	-1.18945	2.28066	down	-3.70842	-1.8908	3.70842	down	-3.69087	-1.88396	3.69087	down		10123	Hs.730678	gb:BG435404 /DB_XREF=gi:13341910 /DB_XREF=602507678F1 /CLONE=IMAGE:4605066 /FEA=FLmRNA /CNT=182 /TID=Hs.111554.0 /TIER=Stack /STK=51 /UG=Hs.111554 /LL=10123 /UG_GENE=ARL7 /UG_TITLE=ADP-ribosylation factor-like 7 /FL=gb:BC001051.1 gb:NM_005737.2 gb:AB016811.1
IQCB1	1.74284e-09	1.54282e-11	-1.40608	-0.491681	1.40608	down	-1.52777	-0.611423	1.52777	down	-1.44799	-0.534054	1.44799	down	-1.71008	-0.774061	1.71008	down	-1.36974	-0.4539	1.36974	down	-1.65322	-0.725282	1.65322	down	-1.71421	-0.777544	1.71421	down		9657	Hs.604110	gb:NM_014642.1 /DB_XREF=gi:7661875 /GEN=KIAA0036 /FEA=FLmRNA /CNT=17 /TID=Hs.169387.0 /TIER=FL /STK=3 /UG=Hs.169387 /LL=9657 /DEF=Homo sapiens KIAA0036 gene product (KIAA0036), mRNA. /PROD=KIAA0036 gene product /FL=gb:D25278.1 gb:NM_014642.1
SP4	1.7748e-09	1.57435e-11	-2.01983	-1.01423	2.01983	down	-2.25543	-1.1734	2.25543	down	-1.99456	-0.996067	1.99456	down	-2.48671	-1.31424	2.48671	down	-1.89397	-0.921412	1.89397	down	-2.37437	-1.24755	2.37437	down	-2.71097	-1.43881	2.71097	down		6671		gb:BF438799 /DB_XREF=gi:11451316 /DB_XREF=nab54b05.x1 /CLONE=IMAGE:3269696 /FEA=EST /CNT=10 /TID=Hs.88013.0 /TIER=ConsEnd /STK=1 /UG=Hs.88013 /UG_TITLE=ESTs
ALG13	1.79507e-09	1.59562e-11	-1.68066	-0.749026	1.68066	down	-2.21389	-1.14658	2.21389	down	-1.74871	-0.80629	1.74871	down	-2.15364	-1.10677	2.15364	down	-1.81525	-0.860171	1.81525	down	-2.32908	-1.21976	2.32908	down	-2.54246	-1.34623	2.54246	down		79868	Hs.443061	gb:NM_024810.1 /DB_XREF=gi:13376194 /GEN=FLJ23018 /FEA=FLmRNA /CNT=26 /TID=Hs.169078.0 /TIER=FL+Stack /STK=13 /UG=Hs.169078 /LL=79868 /DEF=Homo sapiens hypothetical protein FLJ23018 (FLJ23018), mRNA. /PROD=hypothetical protein FLJ23018 /FL=gb:NM_024810.1
UGCG	1.80428e-09	1.6137e-11	2.85289	1.51242	2.85289	up	2.73436	1.4512	2.73436	up	1.93805	0.954602	1.93805	up	2.29627	1.19929	2.29627	up	1.87324	0.905535	1.87324	up	3.41098	1.77019	3.41098	up	2.62135	1.39031	2.62135	up		7357	Hs.304249	gb:NM_003358.1 /DB_XREF=gi:4507810 /GEN=UGCG /FEA=FLmRNA /CNT=69 /TID=Hs.152601.0 /TIER=FL+Stack /STK=8 /UG=Hs.152601 /LL=7357 /DEF=Homo sapiens UDP-glucose ceramide glucosyltransferase (UGCG), mRNA. /PROD=ceramide glucosyltransferase /FL=gb:NM_003358.1 gb:D50840.1
MOB3B	1.80428e-09	1.60773e-11	-1.52424	-0.608087	1.52424	down	-1.95902	-0.970129	1.95902	down	-1.64599	-0.718956	1.64599	down	-1.7921	-0.841651	1.7921	down	-1.51999	-0.604065	1.51999	down	-2.2034	-1.13973	2.2034	down	-2.01218	-1.00876	2.01218	down		79817	Hs.369022	gb:AI692878 /DB_XREF=gi:4970218 /DB_XREF=wd42c12.x1 /CLONE=IMAGE:2330806 /FEA=EST /CNT=13 /TID=Hs.76605.0 /TIER=Stack /STK=9 /UG=Hs.76605 /UG_TITLE=ESTs
DNAJC10	1.80428e-09	1.6136e-11	-1.79611	-0.844877	1.79611	down	-1.89033	-0.918641	1.89033	down	-1.58416	-0.663722	1.58416	down	-2.07705	-1.05454	2.07705	down	-1.47835	-0.563991	1.47835	down	-2.50838	-1.32676	2.50838	down	-2.51607	-1.33117	2.51607	down		54431	Hs.516632	gb:AA651899 /DB_XREF=gi:2583551 /DB_XREF=ns39b09.s1 /CLONE=IMAGE:1185977 /FEA=EST /CNT=17 /TID=Hs.69165.0 /TIER=Stack /STK=11 /UG=Hs.69165 /UG_TITLE=ESTs
FPR1	1.86217e-09	1.66889e-11	2.08071	1.05708	2.08071	up	2.17739	1.1226	2.17739	up	1.95708	0.968706	1.95708	up	2.39906	1.26247	2.39906	up	1.83718	0.87749	1.83718	up	2.26273	1.17806	2.26273	up	2.42882	1.28025	2.42882	up		2357	Hs.753	gb:NM_002029.1 /DB_XREF=gi:4503778 /GEN=FPR1 /FEA=FLmRNA /CNT=53 /TID=Hs.753.0 /TIER=FL+Stack /STK=13 /UG=Hs.753 /LL=2357 /DEF=Homo sapiens formyl peptide receptor 1 (FPR1), mRNA. /PROD=formyl peptide receptor 1 /FL=gb:NM_002029.1 gb:M60627.1 gb:M60626.1 gb:BC005315.1
CBL	1.92375e-09	1.72759e-11	1.50718	0.591847	1.50718	up	1.50706	0.591741	1.50706	up	1.40754	0.493181	1.40754	up	1.50005	0.585012	1.50005	up	1.34626	0.428956	1.34626	up	1.54648	0.628986	1.54648	up	1.73116	0.791736	1.73116	up		867	Hs.504096	gb:AW502463 /DB_XREF=gi:7116969 /DB_XREF=UI-HF-BR0p-ajv-b-10-0-UI.r1 /CLONE=IMAGE:3075787 /FEA=EST /CNT=5 /TID=Hs.196521.0 /TIER=ConsEnd /STK=0 /UG=Hs.196521 /UG_TITLE=ESTs
BLCAP	1.94737e-09	1.75237e-11	-1.49662	-0.581706	1.49662	down	-1.55545	-0.637332	1.55545	down	-1.42878	-0.514786	1.42878	down	-1.52752	-0.611193	1.52752	down	-1.38183	-0.466575	1.38183	down	-1.7166	-0.779557	1.7166	down	-1.65825	-0.729658	1.65825	down		10904	Hs.472651	gb:NM_006698.1 /DB_XREF=gi:5729737 /GEN=BLCAP /FEA=FLmRNA /CNT=319 /TID=Hs.5300.0 /TIER=FL+Stack /STK=85 /UG=Hs.5300 /LL=10904 /DEF=Homo sapiens bladder cancer associated protein (BLCAP), mRNA. /PROD=bladder cancer associated protein /FL=gb:AF053470.1 gb:NM_006698.1
P2RY10	1.9542e-09	1.76209e-11	-3.33539	-1.73786	3.33539	down	-3.99152	-1.99694	3.99152	down	-3.18919	-1.67319	3.18919	down	-4.01694	-2.0061	4.01694	down	-2.84885	-1.51038	2.84885	down	-4.76508	-2.2525	4.76508	down	-5.4392	-2.4434	5.4392	down		27334		gb:AI225238 /DB_XREF=gi:3807951 /DB_XREF=qx12c04.x1 /CLONE=IMAGE:2001126 /FEA=EST /CNT=11 /TID=Hs.176920.0 /TIER=ConsEnd /STK=0 /UG=Hs.176920 /UG_TITLE=ESTs
TBC1D9	1.98404e-09	1.79262e-11	-1.7937	-0.842939	1.7937	down	-2.26763	-1.18118	2.26763	down	-1.8665	-0.900339	1.8665	down	-2.22602	-1.15447	2.22602	down	-1.97309	-0.980454	1.97309	down	-3.42907	-1.77782	3.42907	down	-3.51395	-1.81309	3.51395	down		23158	Hs.480819	gb:AI348094 /DB_XREF=gi:4085300 /DB_XREF=qp61g12.x1 /CLONE=IMAGE:1927558 /FEA=mRNA /CNT=71 /TID=Hs.90419.0 /TIER=Stack /STK=21 /UG=Hs.90419 /LL=23158 /UG_GENE=KIAA0882 /UG_TITLE=KIAA0882 protein
TSHZ3	1.98554e-09	1.80031e-11	1.87308	0.905413	1.87308	up	1.61489	0.691435	1.61489	up	1.66861	0.738643	1.66861	up	2.17479	1.12088	2.17479	up	1.43444	0.520483	1.43444	up	2.05341	1.03802	2.05341	up	2.23868	1.16265	2.23868	up		57616	Hs.278436	gb:BF510588 /DB_XREF=gi:11593886 /DB_XREF=UI-H-BI4-apk-b-12-0-UI.s1 /CLONE=IMAGE:3087694 /FEA=FLmRNA /CNT=73 /TID=Hs.278436.0 /TIER=Stack /STK=12 /UG=Hs.278436 /LL=57616 /UG_GENE=KIAA1474 /UG_TITLE=KIAA1474 protein /FL=gb:AL136805.1
ZDHHC19	1.98554e-09	1.80124e-11	1.60891	0.686084	1.60891	up	1.3484	0.431245	1.3484	up	1.22292	0.290325	1.22292	up	1.58529	0.664746	1.58529	up	1.35872	0.442246	1.35872	up	2.29265	1.19701	2.29265	up	2.77265	1.47127	2.77265	up		131540		gb:NM_144637.1 /DB_XREF=gi:21389462 /TID=Hs2.111591.1 /CNT=2 /FEA=FLmRNA /TIER=FL /STK=0 /LL=131540 /UG_GENE=MGC33345 /UG=Hs.111591 /UG_TITLE=hypothetical protein MGC33345 /DEF=Homo sapiens hypothetical protein MGC33345 (MGC33345), mRNA. /FL=gb:NM_144637.1 gb:BC022078.1
SULT1B1	1.9912e-09	1.81465e-11	3.14958	1.65516	3.14958	up	2.685	1.42492	2.685	up	2.56252	1.35756	2.56252	up	2.80459	1.48779	2.80459	up	2.18018	1.12444	2.18018	up	2.92164	1.54678	2.92164	up	2.61232	1.38533	2.61232	up		27284	Hs.129742	gb:NM_014465.1 /DB_XREF=gi:7657620 /GEN=ST1B2 /FEA=FLmRNA /CNT=4 /TID=Hs.129742.0 /TIER=FL /STK=0 /UG=Hs.129742 /LL=27284 /DEF=Homo sapiens thyroid hormone slfotransferase (ST1B2), mRNA. /PROD=thyroid hormone slfotransferase /FL=gb:D89479.1 gb:NM_014465.1 gb:U95726.1
P2RX1	1.9912e-09	1.81149e-11	1.78719	0.837692	1.78719	up	2.22899	1.15639	2.22899	up	1.77173	0.825163	1.77173	up	2.21323	1.14615	2.21323	up	1.88416	0.913924	1.88416	up	2.35223	1.23403	2.35223	up	2.80785	1.48947	2.80785	up		5023	Hs.41735	gb:U45448.1 /DB_XREF=gi:1314356 /FEA=FLmRNA /CNT=15 /TID=Hs.41735.0 /TIER=FL /STK=3 /UG=Hs.41735 /LL=5023 /UG_GENE=P2RX1 /DEF=Human P2x1 receptor mRNA, complete cds. /PROD=P2X1 receptor /FL=gb:NM_002558.1 gb:U45448.1 gb:AF020498.1
DDAH2	1.9912e-09	1.82095e-11	1.594	0.672647	1.594	up	1.41303	0.498797	1.41303	up	1.24151	0.312101	1.24151	up	1.61028	0.687315	1.61028	up	1.50893	0.593522	1.50893	up	2.10311	1.07252	2.10311	up	2.19605	1.13491	2.19605	up		23564	Hs.247362	gb:AK026191.1 /DB_XREF=gi:10438961 /FEA=mRNA /CNT=12 /TID=Hs.247362.2 /TIER=ConsEnd /STK=0 /UG=Hs.247362 /LL=23564 /UG_GENE=DDAH2 /UG_TITLE=dimethylarginine dimethylaminohydrolase 2 /DEF=Homo sapiens cDNA: FLJ22538 fis, clone HRC13212, highly similar to AF070667 Homo sapiens NG,NG-dimethylarginine dimethylaminohydrolase homolog mRNA.
RAB31	1.9912e-09	1.81739e-11	2.3707	1.24531	2.3707	up	2.30837	1.20687	2.30837	up	2.3346	1.22318	2.3346	up	2.59355	1.37493	2.59355	up	2.22404	1.15318	2.22404	up	2.87309	1.52261	2.87309	up	2.98678	1.57859	2.98678	up		11031	Hs.744887	gb:BE789881 /DB_XREF=gi:10211079 /DB_XREF=601476750F1 /CLONE=IMAGE:3879493 /FEA=FLmRNA /CNT=424 /TID=Hs.223025.0 /TIER=Stack /STK=80 /UG=Hs.223025 /LL=11031 /UG_GENE=RAB31 /UG_TITLE=RAB31, member RAS oncogene family /FL=gb:NM_006868.1 gb:U59877.1 gb:U57091.1 gb:BC001148.1 gb:AF183421.1 gb:AF234995.1
PRPS1	2.05527e-09	1.8833e-11	-1.6419	-0.715364	1.6419	down	-1.83258	-0.873874	1.83258	down	-1.63657	-0.710679	1.63657	down	-1.85393	-0.890589	1.85393	down	-1.52027	-0.604327	1.52027	down	-1.89858	-0.924919	1.89858	down	-2.02314	-1.01659	2.02314	down		5631	Hs.56	gb:BC001605.1 /DB_XREF=gi:12804406 /FEA=FLmRNA /CNT=85 /TID=Hs.56.1 /TIER=FL+Stack /STK=43 /UG=Hs.56 /LL=5631 /UG_GENE=PRPS1 /DEF=Homo sapiens, phosphoribosyl pyrophosphate synthetase 1, clone MGC:2256, mRNA, complete cds. /PROD=phosphoribosyl pyrophosphate synthetase 1 /FL=gb:BC001605.1 gb:D00860.1
TDRD9	2.06648e-09	1.89734e-11	4.98973	2.31896	4.98973	up	3.43367	1.77975	3.43367	up	2.75017	1.45952	2.75017	up	4.2676	2.09343	4.2676	up	3.40415	1.76729	3.40415	up	6.46675	2.69304	6.46675	up	6.05576	2.59831	6.05576	up		122402	Hs.21454	gb:AI989706 /DB_XREF=gi:5836587 /DB_XREF=ws35e10.x1 /CLONE=IMAGE:2499210 /FEA=EST /CNT=28 /TID=Hs.21454.0 /TIER=Stack /STK=18 /UG=Hs.21454 /UG_TITLE=ESTs
RNF24	2.06993e-09	1.9043e-11	1.7624	0.817538	1.7624	up	1.65762	0.729117	1.65762	up	1.57131	0.651965	1.57131	up	2.09843	1.06931	2.09843	up	1.65922	0.730505	1.65922	up	1.82746	0.869839	1.82746	up	2.10215	1.07187	2.10215	up		11237	Hs.589884	gb:BC000213.1 /DB_XREF=gi:12802985 /FEA=FLmRNA /CNT=3 /TID=Hs.30524.1 /TIER=FL /STK=0 /UG=Hs.30524 /LL=11237 /UG_GENE=RNF24 /DEF=Homo sapiens, ring finger protein 24, clone MGC:1815, mRNA, complete cds. /PROD=ring finger protein 24 /FL=gb:BC000213.1
PHTF1	2.0768e-09	1.91821e-11	3.34683	1.7428	3.34683	up	2.04026	1.02875	2.04026	up	1.89321	0.920833	1.89321	up	2.75681	1.463	2.75681	up	2.06499	1.04614	2.06499	up	2.59352	1.37491	2.59352	up	2.38556	1.25433	2.38556	up		10745	Hs.655824	gb:BC002447.1 /DB_XREF=gi:12803264 /FEA=FLmRNA /CNT=14 /TID=Hs.123637.1 /TIER=FL /STK=0 /UG=Hs.123637 /LL=10745 /UG_GENE=PHTF1 /DEF=Homo sapiens, Similar to putative homeodomain transcription factor, clone MGC:1307, mRNA, complete cds. /PROD=Similar to putative homeodomain transcriptionfactor /FL=gb:BC002447.1
U2SURP	2.0768e-09	1.91585e-11	-1.74763	-0.805398	1.74763	down	-2.57041	-1.362	2.57041	down	-1.78393	-0.835061	1.78393	down	-2.1977	-1.13599	2.1977	down	-1.83958	-0.879378	1.83958	down	-2.52351	-1.33543	2.52351	down	-2.84538	-1.50862	2.84538	down		23350	Hs.596572	gb:AB002330.1 /DB_XREF=gi:2224604 /GEN=KIAA0332 /FEA=mRNA /CNT=234 /TID=Hs.7976.0 /TIER=Stack /STK=16 /UG=Hs.7976 /LL=23350 /UG_TITLE=KIAA0332 protein /DEF=Human mRNA for KIAA0332 gene, partial cds.
OSM	2.17537e-09	2.01324e-11	1.79423	0.843366	1.79423	up	1.37401	0.458392	1.37401	up	1.30739	0.38669	1.30739	up	1.92157	0.942288	1.92157	up	1.2981	0.376398	1.2981	up	2.1413	1.09849	2.1413	up	1.69208	0.7588	1.69208	up		5008	Hs.248156	gb:AI079327 /DB_XREF=gi:3415578 /DB_XREF=oz36h01.x1 /CLONE=IMAGE:1677457 /FEA=EST /CNT=12 /TID=Hs.134435.0 /TIER=Stack /STK=10 /UG=Hs.134435 /UG_TITLE=ESTs
ANKRD46	2.17729e-09	2.019e-11	-1.93274	-0.950645	1.93274	down	-2.46145	-1.29951	2.46145	down	-1.96786	-0.976624	1.96786	down	-2.38399	-1.25338	2.38399	down	-1.99741	-0.998128	1.99741	down	-2.64604	-1.40383	2.64604	down	-2.81284	-1.49203	2.81284	down		157567	Hs.530199	gb:U79297.1 /DB_XREF=gi:1710280 /FEA=mRNA /CNT=117 /TID=Hs.11506.0 /TIER=Stack /STK=49 /UG=Hs.11506 /UG_TITLE=Human clone 23589 mRNA sequence /DEF=Human clone 23589 mRNA sequence.
HGF	2.1922e-09	2.03683e-11	1.96732	0.976229	1.96732	up	1.21942	0.2862	1.21942	up	1.21372	0.27944	1.21372	up	1.66527	0.735754	1.66527	up	1.25534	0.328078	1.25534	up	1.99888	0.999194	1.99888	up	1.59394	0.672601	1.59394	up		3082	Hs.396530	gb:M77227.1 /DB_XREF=gi:184029 /FEA=FLmRNA /CNT=4 /TID=Hs.809.1 /TIER=FL /STK=1 /UG=Hs.809 /LL=3082 /UG_GENE=HGF /DEF=H.sapiens competitive HGF antagonist mRNA, complete cds. /PROD=competitive HGF antagonist /FL=gb:L02931.1 gb:M77227.1
LAT	2.23088e-09	2.08846e-11	-3.18836	-1.67281	3.18836	down	-2.1333	-1.09309	2.1333	down	-2.5285	-1.33828	2.5285	down	-3.04238	-1.6052	3.04238	down	-2.1955	-1.13455	2.1955	down	-3.23989	-1.69594	3.23989	down	-3.02256	-1.59577	3.02256	down		27040	Hs.632179	gb:AF036906.1 /DB_XREF=gi:2828025 /GEN=LAT /FEA=FLmRNA /CNT=4 /TID=Hs.83496.1 /TIER=FL /STK=0 /UG=Hs.83496 /LL=27040 /DEF=Homo sapiens linker for activation of T cells (LAT) mRNA, alternatively spliced form, complete cds. /PROD=LAT /FL=gb:NM_014387.1 gb:AF036906.1
GCOM1///POLR2M	2.23088e-09	2.08858e-11	-2.04505	-1.03213	2.04505	down	-2.07938	-1.05615	2.07938	down	-2.00814	-1.00586	2.00814	down	-2.30315	-1.20361	2.30315	down	-1.83404	-0.875022	1.83404	down	-2.2763	-1.18669	2.2763	down	-2.72779	-1.44773	2.72779	down		81488///145781	Hs.437256	gb:AL050091.1 /DB_XREF=gi:4884111 /GEN=DKFZp586F1918 /FEA=mRNA /CNT=188 /TID=Hs.6283.0 /TIER=Stack /STK=43 /UG=Hs.6283 /LL=26006 /DEF=Homo sapiens mRNA; cDNA DKFZp586F1918 (from clone DKFZp586F1918); partial cds. /PROD=hypothetical protein
PUM2	2.23088e-09	2.09725e-11	-1.49549	-0.580614	1.49549	down	-1.67748	-0.746292	1.67748	down	-1.42762	-0.513609	1.42762	down	-1.63669	-0.710782	1.63669	down	-1.50867	-0.593277	1.50867	down	-1.8496	-0.887217	1.8496	down	-1.85935	-0.894795	1.85935	down		23369	Hs.467824	gb:D87078.2 /DB_XREF=gi:6634004 /GEN=KIAA0235 /FEA=mRNA /CNT=2 /TID=Hs.6151.1 /TIER=ConsEnd /STK=0 /UG=Hs.6151 /LL=23369 /DEF=Homo sapiens mRNA for KIAA0235 protein, partial cds. /PROD=KIAA0235 protein
ECRP	2.23088e-09	2.0783e-11	2.9512	1.5613	2.9512	up	2.49357	1.31821	2.49357	up	2.28685	1.19336	2.28685	up	2.55114	1.35114	2.55114	up	2.64534	1.40345	2.64534	up	3.14006	1.65079	3.14006	up	2.79944	1.48514	2.79944	up		643332	Hs.730362	gb:X55989 /DB_XREF=gi:22940 /FEA=DNA /CNT=1 /TID=Hs.166037.0 /TIER=ConsEnd /STK=0 /UG=Hs.166037 /UG_TITLE=Human ECRP gene for eosinophil cationic related protein /DEF=Human ECRP gene for eosinophil cationic related protein
DHRS9	2.23088e-09	2.09626e-11	3.3221	1.7321	3.3221	up	1.45126	0.537309	1.45126	up	1.76941	0.823265	1.76941	up	3.03542	1.6019	3.03542	up	2.15723	1.10918	2.15723	up	4.78159	2.25749	4.78159	up	3.37114	1.75323	3.37114	up		10170	Hs.179608	gb:AF240697.1 /DB_XREF=gi:9082136 /GEN=RDH /FEA=FLmRNA /CNT=3 /TID=Hs.179608.1 /TIER=FL /STK=0 /UG=Hs.179608 /LL=10170 /DEF=Homo sapiens retinol dehydrogenase homolog isoform-2 (RDH) mRNA, complete cds. /PROD=retinol dehydrogenase homolog isoform-2 /FL=gb:AF240697.1
KLHDC1	2.23088e-09	2.09696e-11	-1.33536	-0.417223	1.33536	down	-1.45726	-0.543257	1.45726	down	-1.32159	-0.402279	1.32159	down	-1.58878	-0.667915	1.58878	down	-1.33567	-0.417566	1.33567	down	-1.65005	-0.722514	1.65005	down	-1.6668	-0.737079	1.6668	down		122773	Hs.509258	gb:NM_172193.1 /DB_XREF=gi:26190615 /TID=Hs2.335887.1 /CNT=12 /FEA=FLmRNA /TIER=FL /STK=2 /LL=122773 /UG_GENE=KLHDC1 /UG=Hs.335887 /UG_TITLE=kelch domain containing 1 /DEF=Homo sapiens kelch domain containing 1 (KLHDC1), mRNA. /FL=gb:AF111806.1 gb:NM_172193.1
MME	2.24387e-09	2.11767e-11	-1.61279	-0.689555	1.61279	down	1.04231	0.0597805	1.04231	up	1.13446	0.182012	1.13446	up	-1.49258	-0.577811	1.49258	down	1.1367	0.184855	1.1367	up	-2.37846	-1.25003	2.37846	down	-1.40058	-0.486023	1.40058	down		4311	Hs.307734	gb:NM_007287.1 /DB_XREF=gi:6042199 /GEN=MME /FEA=FLmRNA /CNT=219 /TID=Hs.1298.2 /TIER=FL+Stack /STK=59 /UG=Hs.1298 /LL=4311 /DEF=Homo sapiens membrane metallo-endopeptidase (neutral endopeptidase, enkephalinase, CALLA, CD10) (MME), transcript variant 1bis, mRNA. /PROD=membrane metallo-endopeptidase /FL=gb:NM_007288.1 gb:NM_007287.1 gb:J03779.1
RUNX3	2.24387e-09	2.11627e-11	-2.38279	-1.25265	2.38279	down	-2.4955	-1.31933	2.4955	down	-2.07252	-1.05138	2.07252	down	-2.33436	-1.22302	2.33436	down	-1.93875	-0.955125	1.93875	down	-2.40588	-1.26657	2.40588	down	-2.4404	-1.28712	2.4404	down		864	Hs.170019	gb:NM_004350.1 /DB_XREF=gi:4757917 /GEN=RUNX3 /FEA=FLmRNA /CNT=114 /TID=Hs.170019.0 /TIER=FL+Stack /STK=22 /UG=Hs.170019 /LL=864 /DEF=Homo sapiens runt-related transcription factor 3 (RUNX3), mRNA. /PROD=runt-related transcription factor 3 /FL=gb:NM_004350.1
EBLN3	2.25207e-09	2.12953e-11	-1.7771	-0.829521	1.7771	down	-2.42045	-1.27528	2.42045	down	-1.80273	-0.850185	1.80273	down	-2.19822	-1.13633	2.19822	down	-1.76689	-0.821211	1.76689	down	-2.60002	-1.37853	2.60002	down	-2.94532	-1.55843	2.94532	down		100506710	Hs.446271	gb:BG170478 /DB_XREF=gi:12677181 /DB_XREF=602322848F1 /CLONE=IMAGE:4426211 /FEA=EST /CNT=49 /TID=Hs.94109.1 /TIER=Stack /STK=36 /UG=Hs.94109 /UG_TITLE=Homo sapiens cDNA FLJ13634 fis, clone PLACE1011133
ARL8A	2.29373e-09	2.17311e-11	1.68348	0.751449	1.68348	up	1.49301	0.578228	1.49301	up	1.36665	0.45064	1.36665	up	1.701	0.766381	1.701	up	1.47046	0.556272	1.47046	up	1.91196	0.93505	1.91196	up	1.82082	0.864589	1.82082	up		127829	Hs.497399	gb:AL520984 /DB_XREF=gi:12784477 /DB_XREF=AL520984 /CLONE=CS0DB002YC11 (3 prime) /FEA=EST /CNT=86 /TID=Hs.4779.0 /TIER=Stack /STK=45 /UG=Hs.4779 /LL=57459 /UG_GENE=KIAA1150 /UG_TITLE=KIAA1150 protein
RBMX	2.30872e-09	2.19154e-11	-1.94788	-0.961902	1.94788	down	-3.15602	-1.65811	3.15602	down	-2.10953	-1.07692	2.10953	down	-2.64699	-1.40436	2.64699	down	-2.07462	-1.05285	2.07462	down	-3.03293	-1.60071	3.03293	down	-3.42471	-1.77598	3.42471	down		27316	Hs.380118	gb:AI928344 /DB_XREF=gi:5664308 /DB_XREF=wo96b10.x1 /CLONE=IMAGE:2463163 /FEA=EST /CNT=90 /TID=Hs.146381.3 /TIER=Stack /STK=53 /UG=Hs.146381 /LL=27316 /UG_GENE=RBMX /UG_TITLE=RNA binding motif protein, X chromosome
FCAR	2.34016e-09	2.22567e-11	1.73599	0.795761	1.73599	up	1.48014	0.565729	1.48014	up	1.28003	0.356182	1.28003	up	1.60633	0.683765	1.60633	up	1.30026	0.378801	1.30026	up	1.71535	0.778499	1.71535	up	1.61553	0.692004	1.61553	up		2204	Hs.659872	gb:U56236.1 /DB_XREF=gi:1326228 /FEA=FLmRNA /CNT=1 /TID=Hs.193122.1 /TIER=FL /STK=0 /UG=Hs.193122 /LL=2204 /UG_GENE=FCAR /DEF=Human Fc alpha receptor b mRNA, complete cds. /PROD=FcalphaRb /FL=gb:U56236.1
LILRA6///LILRB2///LILRB3	2.35274e-09	2.24571e-11	2.09806	1.06906	2.09806	up	2.09657	1.06803	2.09657	up	1.99002	0.992783	1.99002	up	2.75434	1.4617	2.75434	up	1.80322	0.850579	1.80322	up	2.54108	1.34544	2.54108	up	2.96862	1.56979	2.96862	up		10288///11025///79168	Hs.688335	gb:NM_024318.1 /DB_XREF=gi:13324689 /GEN=ILT8 /FEA=FLmRNA /CNT=2 /TID=Hs.306230.0 /TIER=FL /STK=0 /UG=Hs.306230 /LL=79168 /DEF=Homo sapiens immunoglobulin-like transcript 8 (ILT8), mRNA. /PROD=immunoglobulin-like transcript 8 /FL=gb:AF041262.1 gb:NM_024318.1
URI1	2.35274e-09	2.24624e-11	-2.14026	-1.09779	2.14026	down	-2.5406	-1.34517	2.5406	down	-1.97232	-0.979895	1.97232	down	-2.38842	-1.25605	2.38842	down	-1.73894	-0.798207	1.73894	down	-2.49743	-1.32045	2.49743	down	-2.76632	-1.46797	2.76632	down		8725	Hs.466391	gb:AB006572.1 /DB_XREF=gi:3970832 /GEN=RMP /FEA=FLmRNA /CNT=2 /TID=Hs.7943.0 /TIER=FL /STK=0 /UG=Hs.7943 /LL=8725 /DEF=Homo sapiens RMP mRNA for RPB5 meidating protein, complete cds. /PROD=RPB5 meidating protein /FL=gb:AB006572.1 gb:NM_003796.1
RRAS2	2.35493e-09	2.25264e-11	-2.36021	-1.23892	2.36021	down	-3.01278	-1.5911	3.01278	down	-2.45224	-1.2941	2.45224	down	-2.80131	-1.4861	2.80131	down	-2.11957	-1.08377	2.11957	down	-3.23915	-1.69562	3.23915	down	-3.83246	-1.93827	3.83246	down		22800	Hs.502004	gb:AI753792 /DB_XREF=gi:5132144 /DB_XREF=cr16f06.x2 /CLONE=HBMSC_cr16f06 /FEA=EST /CNT=139 /TID=Hs.206097.0 /TIER=Stack /STK=40 /UG=Hs.206097 /LL=22800 /UG_GENE=TC21 /UG_TITLE=oncogene TC21
CREBL2	2.37626e-09	2.27738e-11	-1.56914	-0.649975	1.56914	down	-1.67221	-0.741757	1.67221	down	-1.21387	-0.279612	1.21387	down	-1.6277	-0.702831	1.6277	down	-1.31802	-0.398375	1.31802	down	-1.70896	-0.773122	1.70896	down	-1.8463	-0.884637	1.8463	down		1389	Hs.591156	gb:AL529409 /DB_XREF=gi:12792902 /DB_XREF=AL529409 /CLONE=CS0DD006YM17 (3 prime) /FEA=FLmRNA /CNT=211 /TID=Hs.13313.0 /TIER=Stack /STK=62 /UG=Hs.13313 /LL=1389 /UG_GENE=CREBL2 /UG_TITLE=cAMP responsive element binding protein-like 2 /FL=gb:NM_001310.1 gb:AF039081.1
NCF4	2.41657e-09	2.32043e-11	2.25881	1.17556	2.25881	up	2.25563	1.17353	2.25563	up	2.02383	1.01709	2.02383	up	2.79766	1.48422	2.79766	up	2.07882	1.05576	2.07882	up	2.6766	1.4204	2.6766	up	2.95703	1.56415	2.95703	up		4689	Hs.474781	gb:NM_000631.2 /DB_XREF=gi:7382494 /GEN=NCF4 /FEA=FLmRNA /CNT=43 /TID=Hs.196352.0 /TIER=FL /STK=0 /UG=Hs.196352 /LL=4689 /DEF=Homo sapiens neutrophil cytosolic factor 4 (40kD) (NCF4), transcript variant 1, mRNA. /PROD=neutrophil cytosolic factor 4 (40kD), isoform 1 /FL=gb:AB025220.1 gb:NM_000631.2
PDLIM7	2.45444e-09	2.36129e-11	1.31777	0.398095	1.31777	up	1.61424	0.690851	1.61424	up	1.48626	0.571684	1.48626	up	1.92768	0.946869	1.92768	up	1.56791	0.648842	1.56791	up	1.97736	0.983573	1.97736	up	2.37067	1.24529	2.37067	up		9260	Hs.533040	gb:AA086229 /DB_XREF=gi:1628852 /DB_XREF=zn60b06.s1 /CLONE=IMAGE:562547 /FEA=EST /CNT=17 /TID=Hs.102948.1 /TIER=Stack /STK=8 /UG=Hs.102948 /LL=9260 /UG_GENE=ENIGMA /UG_TITLE=enigma (LIM domain protein)
TMEM161B	2.48425e-09	2.39451e-11	-1.74643	-0.804407	1.74643	down	-2.56868	-1.36103	2.56868	down	-1.97486	-0.981748	1.97486	down	-2.56444	-1.35864	2.56444	down	-1.88959	-0.91807	1.88959	down	-2.41638	-1.27285	2.41638	down	-2.95928	-1.56525	2.95928	down		153396	Hs.379972	gb:AI650251 /DB_XREF=gi:4734230 /DB_XREF=wa17f04.x1 /CLONE=IMAGE:2298367 /FEA=EST /CNT=25 /TID=Hs.151725.0 /TIER=Stack /STK=19 /UG=Hs.151725 /UG_TITLE=ESTs
GRB10	2.52585e-09	2.43923e-11	2.21019	1.14417	2.21019	up	2.19315	1.133	2.19315	up	2.31997	1.21411	2.31997	up	2.91428	1.54314	2.91428	up	2.89799	1.53505	2.89799	up	3.01006	1.58979	3.01006	up	3.63918	1.86361	3.63918	up		2887	Hs.164060	gb:U66065.1 /DB_XREF=gi:1518100 /FEA=FLmRNA /CNT=4 /TID=Hs.81875.0 /TIER=FL /STK=0 /UG=Hs.81875 /LL=2887 /UG_GENE=GRB10 /DEF=Human Grb10- and Grb-IR-related splice variant 1 mRNA, complete cds. /PROD=Grb10- and Grb-IR-related splice variant 1 /FL=gb:NM_005311.1 gb:U69276.1 gb:U66065.1
SPTLC2	2.53437e-09	2.45209e-11	1.79033	0.840222	1.79033	up	2.46206	1.29987	2.46206	up	1.96109	0.971657	1.96109	up	2.51362	1.32977	2.51362	up	1.88186	0.91216	1.88186	up	2.3596	1.23854	2.3596	up	2.76315	1.46631	2.76315	up		9517	Hs.435661	gb:NM_004863.1 /DB_XREF=gi:4758667 /GEN=SPTLC2 /FEA=FLmRNA /CNT=108 /TID=Hs.59403.0 /TIER=FL /STK=3 /UG=Hs.59403 /LL=9517 /DEF=Homo sapiens serine palmitoyltransferase, long chain base subunit 2 (SPTLC2), mRNA. /PROD=serine palmitoyltransferase, long chain basesubunit 2 /FL=gb:BC005123.1 gb:NM_004863.1 gb:AB011098.1
POR	2.53895e-09	2.46117e-11	1.67611	0.745115	1.67611	up	1.37178	0.456045	1.37178	up	1.24619	0.317518	1.24619	up	1.8297	0.871605	1.8297	up	1.3383	0.4204	1.3383	up	2.18231	1.12586	2.18231	up	2.08911	1.06289	2.08911	up		5447	Hs.354056	gb:AF258341.1 /DB_XREF=gi:9964002 /FEA=FLmRNA /CNT=266 /TID=Hs.167246.0 /TIER=FL+Stack /STK=122 /UG=Hs.167246 /LL=5447 /UG_GENE=POR /DEF=Homo sapiens NADPH-cytochrome P450 reductase mRNA, complete cds. /PROD=NADPH-cytochrome P450 reductase /FL=gb:AB051763.1 gb:AF258341.1
RUFY3	2.66121e-09	2.58455e-11	-1.40425	-0.489797	1.40425	down	-1.40009	-0.485518	1.40009	down	-1.38775	-0.472749	1.38775	down	-1.39218	-0.477341	1.39218	down	-1.36482	-0.448712	1.36482	down	-1.50482	-0.589586	1.50482	down	-1.56799	-0.648915	1.56799	down		22902	Hs.740904	gb:AA861784 /DB_XREF=gi:2953924 /DB_XREF=ak35d05.s1 /CLONE=IMAGE:1407945 /FEA=EST /CNT=58 /TID=Hs.7972.2 /TIER=Stack /STK=11 /UG=Hs.7972 /LL=22902 /UG_GENE=KIAA0871 /UG_TITLE=KIAA0871 protein
PPM1N	2.73068e-09	2.65702e-11	1.51824	0.6024	1.51824	up	1.8892	0.917777	1.8892	up	1.20862	0.273358	1.20862	up	1.7418	0.800582	1.7418	up	1.52475	0.608569	1.52475	up	2.26071	1.17678	2.26071	up	2.10854	1.07625	2.10854	up		147699	Hs.532872	gb:BE732320 /DB_XREF=gi:10146312 /DB_XREF=601566924F1 /CLONE=IMAGE:3841780 /FEA=EST /CNT=21 /TID=Hs.43897.0 /TIER=Stack /STK=10 /UG=Hs.43897 /UG_TITLE=ESTs, Weakly similar to S22423 phosphoprotein phosphatase (H.sapiens)
FGR	2.74321e-09	2.67422e-11	2.12529	1.08766	2.12529	up	1.76686	0.821184	1.76686	up	1.77274	0.825978	1.77274	up	2.26709	1.18084	2.26709	up	1.74055	0.799542	1.74055	up	2.42731	1.27936	2.42731	up	2.29361	1.19762	2.29361	up		2268	Hs.1422	gb:NM_005248.1 /DB_XREF=gi:4885234 /GEN=FGR /FEA=FLmRNA /CNT=2 /TID=Hs.1422.0 /TIER=FL /STK=0 /UG=Hs.1422 /LL=2268 /DEF=Homo sapiens Gardner-Rasheed feline sarcoma viral (v-fgr) oncogene homolog (FGR), mRNA. /PROD=Gardner-Rasheed feline sarcoma viral (v-fgr)oncogene homolog /FL=gb:NM_005248.1 gb:M19722.1
EBAG9	2.74657e-09	2.68252e-11	-1.83917	-0.879054	1.83917	down	-2.02522	-1.01808	2.02522	down	-1.71568	-0.77878	1.71568	down	-2.16977	-1.11754	2.16977	down	-1.53858	-0.621601	1.53858	down	-2.23905	-1.16289	2.23905	down	-2.63653	-1.39864	2.63653	down		9166	Hs.409368	gb:AA812215 /DB_XREF=gi:2881826 /DB_XREF=ob84g01.s1 /CLONE=IMAGE:1338096 /FEA=FLmRNA /CNT=78 /TID=Hs.9222.0 /TIER=Stack /STK=13 /UG=Hs.9222 /LL=9166 /UG_GENE=EBAG9 /UG_TITLE=estrogen receptor binding site associated, antigen, 9 /FL=gb:AF006265.1 gb:NM_004215.1 gb:BC005249.1 gb:AB007619.1
TSEN15	2.7925e-09	2.7376e-11	-1.93769	-0.954337	1.93769	down	-2.8284	-1.49999	2.8284	down	-1.97557	-0.982271	1.97557	down	-2.34792	-1.23138	2.34792	down	-1.74141	-0.800252	1.74141	down	-2.4855	-1.31354	2.4855	down	-2.71159	-1.43914	2.71159	down		116461	Hs.548197	gb:AF288394.1 /DB_XREF=gi:12620197 /FEA=mRNA /CNT=86 /TID=Hs.32058.1 /TIER=Stack /STK=33 /UG=Hs.32058 /DEF=Homo sapiens C1orf19 mRNA, partial cds. /PROD=C1orf19
CD55	2.7925e-09	2.73404e-11	2.60448	1.381	2.60448	up	2.2584	1.1753	2.2584	up	1.86631	0.900189	1.86631	up	2.53416	1.34151	2.53416	up	1.98046	0.985834	1.98046	up	2.88088	1.52651	2.88088	up	2.62745	1.39367	2.62745	up		1604	Hs.126517	gb:CA448665 /DB_XREF=gi:24813085 /DB_XREF=UI-H-EI0-ayo-p-15-0-UI.s1 /CLONE=UI-H-EI0-ayo-p-15-0-UI /TID=Hs2.1369.3 /CNT=31 /FEA=mRNA /TIER=Stack /STK=9 /LL=1604 /UG_GENE=DAF /UG=Hs.1369 /UG_TITLE=decay accelerating factor for complement (CD55, Cromer blood group system)
PDCD4	2.81954e-09	2.76926e-11	-2.23627	-1.16109	2.23627	down	-1.8879	-0.91678	1.8879	down	-2.02616	-1.01875	2.02616	down	-2.2627	-1.17804	2.2627	down	-1.72083	-0.783108	1.72083	down	-2.3146	-1.21076	2.3146	down	-2.4445	-1.28954	2.4445	down		27250	Hs.711490	gb:AI185160 /DB_XREF=gi:3735798 /DB_XREF=qe30g10.s1 /CLONE=IMAGE:1740546 /FEA=mRNA /CNT=121 /TID=Hs.326248.1 /TIER=Stack /STK=16 /UG=Hs.326248 /UG_TITLE=Homo sapiens cDNA: FLJ22071 fis, clone HEP11691
EIF3F	2.85192e-09	2.80628e-11	-1.59065	-0.669621	1.59065	down	-1.97969	-0.985276	1.97969	down	-1.56469	-0.645881	1.56469	down	-1.83773	-0.877923	1.83773	down	-1.41016	-0.495858	1.41016	down	-1.8223	-0.86576	1.8223	down	-1.91561	-0.937804	1.91561	down		8665		gb:AI872374 /DB_XREF=gi:5546423 /DB_XREF=wm58a12.x1 /CLONE=IMAGE:2440126 /FEA=EST /CNT=10 /TID=Hs.107052.0 /TIER=Stack /STK=10 /UG=Hs.107052 /UG_TITLE=ESTs
DPP8	2.86878e-09	2.82812e-11	-1.51775	-0.601935	1.51775	down	-1.74999	-0.807346	1.74999	down	-1.35719	-0.440624	1.35719	down	-1.65529	-0.727087	1.65529	down	-1.40993	-0.495625	1.40993	down	-1.80476	-0.851804	1.80476	down	-1.83319	-0.874353	1.83319	down		54878		gb:W74486 /DB_XREF=gi:1384960 /DB_XREF=zd56b07.s1 /CLONE=IMAGE:344629 /FEA=EST /CNT=69 /TID=Hs.6119.0 /TIER=Stack /STK=40 /UG=Hs.6119 /UG_TITLE=ESTs
NQO2	2.88927e-09	2.8536e-11	3.5334	1.82106	3.5334	up	3.41557	1.77213	3.41557	up	3.02935	1.59901	3.02935	up	4.29746	2.10349	4.29746	up	3.33726	1.73866	3.33726	up	4.16903	2.05971	4.16903	up	4.48398	2.16478	4.48398	up		4835	Hs.533050	gb:NM_000904.1 /DB_XREF=gi:4505416 /GEN=NMOR2 /FEA=FLmRNA /CNT=87 /TID=Hs.73956.0 /TIER=FL+Stack /STK=34 /UG=Hs.73956 /LL=4835 /DEF=Homo sapiens NAD(P)H menadione oxidoreductase 2, dioxin-inducible (NMOR2), mRNA. /PROD=NAD(P)H menadione oxidoreductase 2,dioxin-inducible /FL=gb:NM_000904.1 gb:J02888.1
SRPK1	2.90201e-09	2.88211e-11	1.84216	0.881396	1.84216	up	1.34559	0.428238	1.34559	up	1.56358	0.644857	1.56358	up	1.73535	0.795226	1.73535	up	1.42798	0.513975	1.42798	up	1.66277	0.733591	1.66277	up	1.71339	0.776856	1.71339	up		6732	Hs.443861	gb:AW082913 /DB_XREF=gi:6038065 /DB_XREF=xc04c12.x1 /CLONE=IMAGE:2583286 /FEA=FLmRNA /CNT=179 /TID=Hs.75761.0 /TIER=Stack /STK=8 /UG=Hs.75761 /LL=6732 /UG_GENE=SRPK1 /UG_TITLE=SFRS protein kinase 1 /FL=gb:NM_003137.1 gb:U09564.1
RABGAP1L	2.90201e-09	2.8797e-11	-1.72238	-0.784405	1.72238	down	-1.84199	-0.881262	1.84199	down	-1.47663	-0.562312	1.47663	down	-2.0858	-1.0606	2.0858	down	-1.73724	-0.796793	1.73724	down	-2.27369	-1.18503	2.27369	down	-2.39079	-1.25749	2.39079	down		9910	Hs.585378///Hs.744937	gb:NM_014857.1 /DB_XREF=gi:7662143 /GEN=KIAA0471 /FEA=FLmRNA /CNT=124 /TID=Hs.242271.0 /TIER=FL+Stack /STK=35 /UG=Hs.242271 /LL=9910 /DEF=Homo sapiens KIAA0471 gene product (KIAA0471), mRNA. /PROD=KIAA0471 gene product /FL=gb:AB007940.1 gb:NM_014857.1
CNIH4	2.90201e-09	2.87982e-11	2.51341	1.32965	2.51341	up	2.05426	1.03862	2.05426	up	1.81301	0.858387	1.81301	up	2.25257	1.17157	2.25257	up	2.04402	1.03141	2.04402	up	2.89206	1.5321	2.89206	up	2.33632	1.22424	2.33632	up		29097	Hs.445890	gb:AL136930.1 /DB_XREF=gi:12053354 /GEN=DKFZp586E1222 /FEA=FLmRNA /CNT=4 /TID=Hs.108854.1 /TIER=FL /STK=3 /UG=Hs.108854 /LL=29097 /DEF=Homo sapiens mRNA; cDNA DKFZp586E1222 (from clone DKFZp586E1222); complete cds. /PROD=hypothetical protein /FL=gb:AL136930.1
DHRS9	2.90563e-09	2.89102e-11	2.7955	1.48311	2.7955	up	1.58507	0.664548	1.58507	up	1.56361	0.644883	1.56361	up	2.54034	1.34502	2.54034	up	2.06892	1.04888	2.06892	up	4.11811	2.04198	4.11811	up	3.0405	1.60431	3.0405	up		10170	Hs.179608	gb:NM_005771.1 /DB_XREF=gi:5032034 /GEN=RDHL) /FEA=FLmRNA /CNT=20 /TID=Hs.179608.0 /TIER=FL+Stack /STK=12 /UG=Hs.179608 /LL=10170 /DEF=Homo sapiens retinol dehydrogenase homolog (RDHL)), mRNA. /PROD=retinol dehydrogenase homolog /FL=gb:AF067174.1 gb:NM_005771.1
NMT2	2.90636e-09	2.89706e-11	-2.73019	-1.449	2.73019	down	-2.26265	-1.17801	2.26265	down	-2.14228	-1.09915	2.14228	down	-3.03049	-1.59955	3.03049	down	-1.94086	-0.956698	1.94086	down	-3.32949	-1.7353	3.32949	down	-3.00355	-1.58667	3.00355	down		9397	Hs.60339	gb:NM_004808.1 /DB_XREF=gi:4758815 /GEN=NMT2 /FEA=FLmRNA /CNT=40 /TID=Hs.122647.0 /TIER=FL /STK=1 /UG=Hs.122647 /LL=9397 /DEF=Homo sapiens N-myristoyltransferase 2 (NMT2), mRNA. /PROD=glycylpeptide N-tetradecanoyltransferase 2 /FL=gb:NM_004808.1 gb:AF043325.1
EML6	2.91036e-09	2.90637e-11	-1.55188	-0.634019	1.55188	down	-1.66004	-0.731219	1.66004	down	-1.46329	-0.549211	1.46329	down	-1.7184	-0.781066	1.7184	down	-1.41739	-0.503239	1.41739	down	-1.6816	-0.749833	1.6816	down	-1.73516	-0.795071	1.73516	down		400954	Hs.656692	gb:AA236463 /DB_XREF=gi:1858861 /DB_XREF=zr66f11.s1 /CLONE=IMAGE:668397 /FEA=mRNA /CNT=15 /TID=Hs.23017.1 /TIER=Stack /STK=11 /UG=Hs.23017 /UG_TITLE=Homo sapiens cDNA: FLJ22747 fis, clone KAIA0120
FNBP4	2.93592e-09	2.93727e-11	-1.84522	-0.883793	1.84522	down	-2.1103	-1.07745	2.1103	down	-1.77979	-0.831708	1.77979	down	-2.25735	-1.17463	2.25735	down	-1.73033	-0.791051	1.73033	down	-2.46473	-1.30143	2.46473	down	-2.48832	-1.31517	2.48832	down		23360	Hs.6834	gb:AB023231.1 /DB_XREF=gi:4589677 /GEN=KIAA1014 /FEA=mRNA /CNT=174 /TID=Hs.6834.0 /TIER=Stack /STK=49 /UG=Hs.6834 /LL=23360 /DEF=Homo sapiens mRNA for KIAA1014 protein, partial cds. /PROD=KIAA1014 protein
LMNB1	2.95439e-09	2.96114e-11	2.99161	1.58092	2.99161	up	2.67063	1.41718	2.67063	up	2.59859	1.37773	2.59859	up	3.37823	1.75627	3.37823	up	2.30709	1.20607	2.30709	up	2.98675	1.57857	2.98675	up	2.70402	1.4351	2.70402	up		4001	Hs.89497	gb:NM_005573.1 /DB_XREF=gi:5031876 /GEN=LMNB1 /FEA=FLmRNA /CNT=96 /TID=Hs.89497.0 /TIER=FL+Stack /STK=25 /UG=Hs.89497 /LL=4001 /DEF=Homo sapiens lamin B1 (LMNB1), mRNA. /PROD=lamin B1 /FL=gb:M34458.1 gb:NM_005573.1
SACS	2.97093e-09	2.98315e-11	-2.53189	-1.34022	2.53189	down	-2.84572	-1.50879	2.84572	down	-2.30364	-1.20391	2.30364	down	-3.04683	-1.60731	3.04683	down	-2.03772	-1.02696	2.03772	down	-3.05507	-1.6112	3.05507	down	-3.44613	-1.78498	3.44613	down		26278	Hs.159492	gb:AI932370 /DB_XREF=gi:5671107 /DB_XREF=wd27e11.x1 /CLONE=IMAGE:2329388 /FEA=FLmRNA /CNT=60 /TID=Hs.159492.0 /TIER=Stack /STK=18 /UG=Hs.159492 /LL=26278 /UG_GENE=SACS /UG_TITLE=spastic ataxia of Charlevoix-Saguenay (sacsin) /FL=gb:NM_014363.1
GGTLC1	3.07195e-09	3.09369e-11	1.10375	0.142414	1.10375	up	-1.0364	-0.0515757	1.0364	down	1.02835	0.0403272	1.02835	up	1.24913	0.320925	1.24913	up	1.11149	0.152491	1.11149	up	1.36372	0.447549	1.36372	up	1.39868	0.484063	1.39868	up		92086	Hs.355394	gb:L20492.1 /DB_XREF=gi:306752 /FEA=FLmRNA /CNT=1 /TID=Hs.284380.2 /TIER=FL /STK=0 /UG=Hs.284380 /LL=2678 /UG_GENE=GGT1 /DEF=Human gamma-glutamyl transpeptidase mRNA, complete cds. /PROD=gamma-glutamyl transpeptidase /FL=gb:L20492.1
PAXIP1-AS1	3.07195e-09	3.09582e-11	-1.61188	-0.688748	1.61188	down	-1.81121	-0.856954	1.81121	down	-1.63801	-0.711942	1.63801	down	-1.98312	-0.98777	1.98312	down	-1.51797	-0.602144	1.51797	down	-2.08589	-1.06066	2.08589	down	-2.11725	-1.08219	2.11725	down		202781	Hs.193172	gb:BG400596 /DB_XREF=gi:13294044 /DB_XREF=602464249F1 /CLONE=IMAGE:4592173 /FEA=EST /CNT=11 /TID=Hs.193172.0 /TIER=ConsEnd /STK=0 /UG=Hs.193172 /UG_TITLE=ESTs, Moderately similar to ALUA_HUMAN !!!! ALU CLASS A WARNING ENTRY !!! (H.sapiens)
STAT3	3.1409e-09	3.17106e-11	1.69218	0.758879	1.69218	up	1.37685	0.461375	1.37685	up	1.61144	0.688347	1.61144	up	2.08131	1.05749	2.08131	up	1.67898	0.747589	1.67898	up	2.04642	1.0331	2.04642	up	2.20776	1.14258	2.20776	up		6774	Hs.463059	gb:BC000627.1 /DB_XREF=gi:12653684 /FEA=FLmRNA /CNT=166 /TID=Hs.321677.0 /TIER=FL+Stack /STK=19 /UG=Hs.321677 /LL=6774 /UG_GENE=STAT3 /DEF=Homo sapiens, Signal transducer and activator of transcription 3, clone MGC:1607, mRNA, complete cds. /PROD=Signal transducer and activator of transcription3 /FL=gb:NM_003150.1 gb:L29277.1 gb:BC000627.1
FAM43A	3.16386e-09	3.20003e-11	-1.58974	-0.668789	1.58974	down	-1.82096	-0.8647	1.82096	down	-1.58725	-0.666531	1.58725	down	-1.82832	-0.870522	1.82832	down	-1.62225	-0.697997	1.62225	down	-2.10958	-1.07696	2.10958	down	-1.91821	-0.939763	1.91821	down		131583	Hs.435080	gb:AW264102 /DB_XREF=gi:6640918 /DB_XREF=xq83g09.x1 /CLONE=IMAGE:2757280 /FEA=EST /CNT=31 /TID=Hs.39168.0 /TIER=Stack /STK=11 /UG=Hs.39168 /UG_TITLE=ESTs
TIMP2	3.18598e-09	3.23406e-11	2.02846	1.02039	2.02846	up	2.43674	1.28495	2.43674	up	2.04279	1.03054	2.04279	up	2.94453	1.55804	2.94453	up	2.33074	1.22079	2.33074	up	2.69897	1.43241	2.69897	up	3.40019	1.76562	3.40019	up		7077	Hs.633514	gb:NM_003255.2 /DB_XREF=gi:9257247 /GEN=TIMP2 /FEA=FLmRNA /CNT=101 /TID=Hs.325495.0 /TIER=FL+Stack /STK=28 /UG=Hs.325495 /LL=7077 /DEF=Homo sapiens tissue inhibitor of metalloproteinase 2 (TIMP2), mRNA. /PROD=tissue inhibitor of metalloproteinase 2precursor /FL=gb:NM_003255.2 gb:J05593.1 gb:M32304.1
CYLD	3.18598e-09	3.2285e-11	-2.14952	-1.10401	2.14952	down	-2.03409	-1.02438	2.03409	down	-1.82768	-0.870016	1.82768	down	-2.22239	-1.15211	2.22239	down	-1.89883	-0.925108	1.89883	down	-2.41047	-1.26932	2.41047	down	-2.44015	-1.28697	2.44015	down		1540	Hs.578973	gb:AA555096 /DB_XREF=gi:2325635 /DB_XREF=nj40e01.s1 /CLONE=IMAGE:994968 /FEA=mRNA /CNT=47 /TID=Hs.26295.0 /TIER=Stack /STK=21 /UG=Hs.26295 /UG_TITLE=Homo sapiens mRNA; cDNA DKFZp586D1122 (from clone DKFZp586D1122)
EHD1	3.18715e-09	3.24107e-11	1.21229	0.27773	1.21229	up	1.02257	0.0322058	1.02257	up	1.54962	0.631911	1.54962	up	1.96259	0.972759	1.96259	up	1.75083	0.808043	1.75083	up	1.9217	0.942382	1.9217	up	2.30522	1.2049	2.30522	up		10938	Hs.523774	gb:AW182860 /DB_XREF=gi:6451320 /DB_XREF=xj64g08.x1 /CLONE=IMAGE:2662046 /FEA=FLmRNA /CNT=263 /TID=Hs.155119.1 /TIER=Stack /STK=11 /UG=Hs.155119 /LL=10938 /UG_GENE=EHD1 /UG_TITLE=EH domain containing 1 /FL=gb:AF001434.1
NAIP	3.19715e-09	3.25709e-11	4.21767	2.07644	4.21767	up	3.13985	1.65069	3.13985	up	3.10559	1.63487	3.10559	up	3.95548	1.98385	3.95548	up	2.96042	1.5658	2.96042	up	3.97348	1.9904	3.97348	up	3.91384	1.96858	3.91384	up		4671	Hs.654500	gb:NM_004536.1 /DB_XREF=gi:4758751 /GEN=BIRC1 /FEA=FLmRNA /CNT=49 /TID=Hs.79019.0 /TIER=FL /STK=0 /UG=Hs.79019 /LL=4671 /DEF=Homo sapiens baculoviral IAP repeat-containing 1 (BIRC1), mRNA. /PROD=baculoviral IAP repeat-containing 1 /FL=gb:NM_004536.1 gb:U19251.1
HLA-DMA	3.26752e-09	3.33476e-11	-2.13379	-1.09342	2.13379	down	-1.98347	-0.988027	1.98347	down	-1.81861	-0.862839	1.81861	down	-1.75106	-0.808228	1.75106	down	-1.69611	-0.762234	1.69611	down	-2.85023	-1.51108	2.85023	down	-2.62212	-1.39073	2.62212	down		3108	Hs.728759	gb:X76775 /DB_XREF=gi:512468 /FEA=DNA_1 /CNT=1 /TID=Hs.77522.1 /TIER=ConsEnd /STK=0 /UG=Hs.77522 /LL=3108 /UG_GENE=HLA-DMA /UG_TITLE=major histocompatibility complex, class II, DM alpha /DEF=H.sapiens HLA-DMA gene
ZNF507	3.29504e-09	3.36886e-11	-1.68475	-0.752538	1.68475	down	-1.8214	-0.865051	1.8214	down	-1.58211	-0.66185	1.58211	down	-2.01373	-1.00987	2.01373	down	-1.46484	-0.550741	1.46484	down	-1.90515	-0.929905	1.90515	down	-2.06766	-1.048	2.06766	down		22847	Hs.205392	gb:N64593 /DB_XREF=gi:1212422 /DB_XREF=yz86a05.s1 /CLONE=IMAGE:289904 /FEA=EST /CNT=55 /TID=Hs.173699.0 /TIER=Stack /STK=20 /UG=Hs.173699 /UG_TITLE=ESTs, Weakly similar to ALU1_HUMAN ALU SUBFAMILY J SEQUENCE CONTAMINATION WARNING ENTRY (H.sapiens)
SLCO4A1	3.3177e-09	3.40417e-11	1.17242	0.229488	1.17242	up	1.11411	0.155891	1.11411	up	1.1139	0.155622	1.1139	up	1.21238	0.277838	1.21238	up	1.2598	0.333191	1.2598	up	1.79318	0.842518	1.79318	up	1.54038	0.62329	1.54038	up		28231	Hs.235782	gb:NM_016354.1 /DB_XREF=gi:7706516 /GEN=SLC21A12 /FEA=FLmRNA /CNT=19 /TID=Hs.235782.0 /TIER=FL /STK=1 /UG=Hs.235782 /LL=28231 /DEF=Homo sapiens solute carrier family 21 (organic anion transporter), member 12 (SLC21A12), mRNA. /PROD=organic anion transporter OATP-E /FL=gb:AB031051.1 gb:NM_016354.1 gb:AF205072.1 gb:AF187817.1
CCDC191	3.3177e-09	3.40177e-11	-1.19246	-0.253945	1.19246	down	-1.482	-0.567544	1.482	down	-1.39853	-0.483915	1.39853	down	-1.56998	-0.65075	1.56998	down	-1.51185	-0.596318	1.51185	down	-1.68801	-0.755322	1.68801	down	-1.7366	-0.796263	1.7366	down		57577	Hs.477159	gb:AW193515 /DB_XREF=gi:6472214 /DB_XREF=xm17c03.x1 /CLONE=IMAGE:2684452 /FEA=mRNA /CNT=37 /TID=Hs.15370.0 /TIER=Stack /STK=19 /UG=Hs.15370 /LL=57577 /UG_GENE=KIAA1407 /UG_TITLE=KIAA1407 protein
WSB1	3.40195e-09	3.49684e-11	2.86945	1.52078	2.86945	up	3.64314	1.86518	3.64314	up	1.82843	0.870605	1.82843	up	2.66194	1.41248	2.66194	up	1.89254	0.920326	1.89254	up	3.22049	1.68728	3.22049	up	2.55012	1.35057	2.55012	up		26118	Hs.446017	gb:N24643 /DB_XREF=gi:1138793 /DB_XREF=yx89f11.s1 /CLONE=IMAGE:268941 /FEA=FLmRNA /CNT=305 /TID=Hs.187991.0 /TIER=Stack /STK=8 /UG=Hs.187991 /LL=26118 /UG_GENE=DKFZP564A122 /UG_TITLE=DKFZP564A122 protein /FL=gb:NM_015626.1 gb:AF106684.1
ZBTB5	3.42723e-09	3.52909e-11	-1.39273	-0.477917	1.39273	down	-1.32173	-0.402429	1.32173	down	-1.3372	-0.419221	1.3372	down	-1.53238	-0.61577	1.53238	down	-1.24839	-0.320071	1.24839	down	-1.61333	-0.690039	1.61333	down	-1.6434	-0.716682	1.6434	down		9925	Hs.161276	gb:NM_014872.1 /DB_XREF=gi:7662073 /GEN=KIAA0354 /FEA=FLmRNA /CNT=126 /TID=Hs.3682.0 /TIER=FL+Stack /STK=58 /UG=Hs.3682 /LL=9925 /DEF=Homo sapiens KIAA0354 gene product (KIAA0354), mRNA. /PROD=KIAA0354 gene product /FL=gb:AB002352.1 gb:NM_014872.1
ZYX	3.46635e-09	3.57571e-11	1.69434	0.760724	1.69434	up	1.78243	0.833844	1.78243	up	1.53804	0.621091	1.53804	up	2.41167	1.27003	2.41167	up	1.82648	0.869065	1.82648	up	2.11035	1.07748	2.11035	up	2.96309	1.5671	2.96309	up		7791	Hs.490415	gb:BC002323.1 /DB_XREF=gi:12803044 /FEA=mRNA /CNT=3 /TID=Hs.75873.1 /TIER=ConsEnd /STK=0 /UG=Hs.75873 /LL=7791 /UG_GENE=ZYX /DEF=Homo sapiens, Similar to thyroid hormone receptor interactor 6, clone IMAGE:3504464, mRNA, partial cds. /PROD=Similar to thyroid hormone receptor interactor6
MSRB1	3.51584e-09	3.63962e-11	2.0297	1.02127	2.0297	up	2.11289	1.07922	2.11289	up	1.7871	0.837623	1.7871	up	2.37216	1.2462	2.37216	up	1.81311	0.85847	1.81311	up	2.32819	1.21921	2.32819	up	2.3262	1.21797	2.3262	up		51734	Hs.655346	gb:NM_016332.1 /DB_XREF=gi:7706510 /GEN=SEPX1 /FEA=FLmRNA /CNT=174 /TID=Hs.279623.0 /TIER=FL+Stack /STK=66 /UG=Hs.279623 /LL=51734 /DEF=Homo sapiens selenoprotein X, 1 (SEPX1), mRNA. /PROD=selenoprotein X, 1 /FL=gb:AF166124.1 gb:NM_016332.1 gb:AF187272.1 gb:BC003127.1
OPLAH	3.51584e-09	3.63886e-11	2.10389	1.07306	2.10389	up	2.01133	1.00815	2.01133	up	1.53463	0.61789	1.53463	up	2.00821	1.00591	2.00821	up	1.79813	0.846501	1.79813	up	2.5811	1.36799	2.5811	up	2.95354	1.56245	2.95354	up		26873	Hs.305882	gb:AI991887 /DB_XREF=gi:5838792 /DB_XREF=wu32h11.x1 /CLONE=IMAGE:2521797 /FEA=mRNA /CNT=15 /TID=Hs.305882.0 /TIER=Stack /STK=11 /UG=Hs.305882 /LL=26873 /UG_GENE=OPLAH /UG_TITLE=5-oxoprolinase (ATP-hydrolysing)
MGST1	3.59181e-09	3.72484e-11	2.33346	1.22247	2.33346	up	1.89427	0.921645	1.89427	up	1.9019	0.927444	1.9019	up	2.15669	1.10882	2.15669	up	1.96677	0.975825	1.96677	up	2.10666	1.07496	2.10666	up	2.15307	1.1064	2.15307	up		4257	Hs.389700	gb:AV705233 /DB_XREF=gi:10722539 /DB_XREF=AV705233 /CLONE=ADBAWG11 /FEA=EST /CNT=8 /TID=Hs.132678.0 /TIER=ConsEnd /STK=0 /UG=Hs.132678 /UG_TITLE=ESTs
HIP1	3.63571e-09	3.77701e-11	3.03351	1.60099	3.03351	up	1.96053	0.971242	1.96053	up	1.91199	0.935074	1.91199	up	3.1469	1.65393	3.1469	up	1.9485	0.962366	1.9485	up	3.97177	1.98978	3.97177	up	3.56572	1.83419	3.56572	up		3092	Hs.329266	gb:NM_005338.3 /DB_XREF=gi:12545385 /GEN=HIP1 /FEA=FLmRNA /CNT=54 /TID=Hs.97206.0 /TIER=FL /STK=0 /UG=Hs.97206 /LL=3092 /DEF=Homo sapiens huntingtin interacting protein 1 (HIP1), mRNA. /PROD=huntingtin interacting protein 1 /FL=gb:U79734.1 gb:NM_005338.3
KIAA1671	3.69935e-09	3.84989e-11	-1.57456	-0.654945	1.57456	down	-1.56907	-0.649913	1.56907	down	-1.57761	-0.657742	1.57761	down	-1.74346	-0.801953	1.74346	down	-1.62294	-0.698606	1.62294	down	-1.66706	-0.737309	1.66706	down	-1.8106	-0.856465	1.8106	down		85379	Hs.419171	gb:AB051458.1 /DB_XREF=gi:13359214 /GEN=KIAA1671 /FEA=mRNA /CNT=72 /TID=Hs.7890.0 /TIER=Stack /STK=32 /UG=Hs.7890 /DEF=Homo sapiens mRNA for KIAA1671 protein, partial cds. /PROD=KIAA1671 protein
AZI2	3.71179e-09	3.86963e-11	1.67444	0.743676	1.67444	up	1.26563	0.339855	1.26563	up	1.18641	0.246598	1.18641	up	1.38822	0.473239	1.38822	up	1.29953	0.37799	1.29953	up	1.638	0.711931	1.638	up	1.2434	0.314296	1.2434	up		64343	Hs.706676	gb:BF000175 /DB_XREF=gi:10700450 /DB_XREF=7h18h06.x1 /CLONE=IMAGE:3316379 /FEA=EST /CNT=22 /TID=Hs.164478.3 /TIER=Stack /STK=13 /UG=Hs.164478 /LL=64343 /UG_GENE=FLJ21939 /UG_TITLE=hypothetical protein FLJ21939 similar to 5-azacytidine induced gene 2
TMEM120A	3.73933e-09	3.90518e-11	1.94305	0.958321	1.94305	up	1.69479	0.761106	1.69479	up	1.53347	0.616803	1.53347	up	2.01286	1.00925	2.01286	up	1.61587	0.692313	1.61587	up	2.33663	1.22443	2.33663	up	2.26579	1.18001	2.26579	up		83862	Hs.488835	gb:AF327923.1 /DB_XREF=gi:13241760 /GEN=TMPIT /FEA=FLmRNA /CNT=40 /TID=Hs.314243.0 /TIER=FL /STK=0 /UG=Hs.314243 /DEF=Homo sapiens transmembrane protein induced by tumor necrosis factor alpha (TMPIT) mRNA, complete cds. /PROD=transmembrane protein induced by tumor necrosisfactor alpha /FL=gb:AF327923.1
CD59	3.82426e-09	4.00787e-11	2.41344	1.27109	2.41344	up	2.6292	1.39463	2.6292	up	2.18793	1.12957	2.18793	up	2.7243	1.44589	2.7243	up	2.24846	1.16894	2.24846	up	3.00346	1.58662	3.00346	up	2.62091	1.39007	2.62091	up		966	Hs.278573///Hs.709466	gb:BF983379 /DB_XREF=gi:12386191 /DB_XREF=602305270F1 /CLONE=IMAGE:4396576 /FEA=FLmRNA /CNT=428 /TID=Hs.119663.0 /TIER=Stack /STK=83 /UG=Hs.119663 /LL=966 /UG_GENE=CD59 /UG_TITLE=CD59 antigen p18-20 (antigen identified by monoclonal antibodies 16.3A5, EJ16, EJ30, EL32 and G344) /FL=gb:NM_000611.1 gb:M34671.1
FCRL2	3.82426e-09	4.00317e-11	-1.25089	-0.322958	1.25089	down	-1.66335	-0.734093	1.66335	down	-1.71273	-0.776293	1.71273	down	-1.7264	-0.787766	1.7264	down	-1.7204	-0.782741	1.7204	down	-2.19923	-1.137	2.19923	down	-2.19268	-1.13269	2.19268	down		79368	Hs.437393	gb:AL833361.1 /DB_XREF=gi:21733996 /TID=Hs2.376871.1 /CNT=1 /FEA=mRNA /TIER=ConsEnd /STK=0 /UG=Hs.376871 /UG_TITLE=Homo sapiens mRNA; cDNA DKFZp667E1614 (from clone DKFZp667E1614) /DEF=Homo sapiens mRNA; cDNA DKFZp667E1614 (from clone DKFZp667E1614).
GCLM	3.84726e-09	4.04045e-11	2.21441	1.14692	2.21441	up	1.26942	0.344169	1.26942	up	1.46372	0.549644	1.46372	up	2.08706	1.06147	2.08706	up	1.72799	0.789098	1.72799	up	2.58625	1.37086	2.58625	up	2.04423	1.03156	2.04423	up		2730	Hs.315562	gb:NM_002061.1 /DB_XREF=gi:4504010 /GEN=GCLM /FEA=FLmRNA /CNT=76 /TID=Hs.89709.0 /TIER=FL+Stack /STK=15 /UG=Hs.89709 /LL=2730 /DEF=Homo sapiens glutamate-cysteine ligase, modifier subunit (GCLM), mRNA. /PROD=glutamate-cysteine ligase regulatory protein /FL=gb:NM_002061.1 gb:L35546.1
TBC1D8	3.84726e-09	4.04605e-11	2.68584	1.42538	2.68584	up	1.64966	0.722169	1.64966	up	1.63867	0.712526	1.63867	up	2.72754	1.4476	2.72754	up	1.70586	0.7705	1.70586	up	3.15511	1.65769	3.15511	up	2.48553	1.31356	2.48553	up		11138	Hs.442657	gb:NM_007063.1 /DB_XREF=gi:5902153 /GEN=VRP /FEA=FLmRNA /CNT=70 /TID=Hs.164170.0 /TIER=FL+Stack /STK=15 /UG=Hs.164170 /LL=11138 /DEF=Homo sapiens vascular Rab-GAPTBC-containing (VRP), mRNA. /PROD=vascular Rab-GAPTBC-containing /FL=gb:NM_007063.1 gb:AB024057.1
DHRS3	3.89196e-09	4.10017e-11	-1.74498	-0.803211	1.74498	down	-1.57015	-0.650905	1.57015	down	-1.65471	-0.726579	1.65471	down	-1.76696	-0.821266	1.76696	down	-1.59755	-0.67586	1.59755	down	-1.80567	-0.852537	1.80567	down	-1.74563	-0.803746	1.74563	down		9249	Hs.289347	gb:NM_004753.1 /DB_XREF=gi:4759083 /GEN=SDR1 /FEA=FLmRNA /CNT=134 /TID=Hs.17144.0 /TIER=FL+Stack /STK=62 /UG=Hs.17144 /LL=9249 /DEF=Homo sapiens short-chain dehydrogenasereductase 1 (SDR1), mRNA. /PROD=short-chain dehydrogenasereductase 1 /FL=gb:BC002730.1 gb:AF061741.1 gb:NM_004753.1
DYRK2	3.89386e-09	4.11642e-11	-2.82578	-1.49865	2.82578	down	-2.76742	-1.46854	2.76742	down	-2.46601	-1.30218	2.46601	down	-3.19852	-1.67741	3.19852	down	-2.26298	-1.17823	2.26298	down	-3.16208	-1.66087	3.16208	down	-3.473	-1.79618	3.473	down		8445	Hs.173135	gb:AI216690 /DB_XREF=gi:3785731 /DB_XREF=qg66h07.x1 /CLONE=IMAGE:1840189 /FEA=FLmRNA /CNT=129 /TID=Hs.173135.1 /TIER=Stack /STK=19 /UG=Hs.173135 /LL=8445 /UG_GENE=DYRK2 /UG_TITLE=dual-specificity tyrosine-(Y)-phosphorylation regulated kinase 2 /FL=gb:NM_006482.1
CYP19A1	3.89386e-09	4.11425e-11	1.89887	0.925145	1.89887	up	1.23896	0.309127	1.23896	up	1.16613	0.221733	1.16613	up	1.51621	0.600473	1.51621	up	1.18913	0.249904	1.18913	up	2.61268	1.38553	2.61268	up	2.6301	1.39512	2.6301	up		1588	Hs.260074	gb:NM_000103.1 /DB_XREF=gi:4503196 /GEN=CYP19 /FEA=FLmRNA /CNT=369 /TID=Hs.79946.0 /TIER=FL /STK=0 /UG=Hs.79946 /LL=1588 /DEF=Homo sapiens cytochrome P450, subfamily XIX (aromatization of androgens) (CYP19), mRNA. /PROD=cytochrome P450, subfamily XIX (aromatization ofandrogens) /FL=gb:M18856.1 gb:M22246.1 gb:NM_000103.1 gb:M28420.1 gb:J04127.1
TGFBI	4.00277e-09	4.26001e-11	-1.41155	-0.497279	1.41155	down	-1.57889	-0.658914	1.57889	down	-1.36465	-0.448526	1.36465	down	-1.55691	-0.638684	1.55691	down	-1.82484	-0.86777	1.82484	down	-3.00586	-1.58778	3.00586	down	-2.65077	-1.40641	2.65077	down		7045	Hs.369397	gb:NM_000358.1 /DB_XREF=gi:4507466 /GEN=TGFBI /FEA=FLmRNA /CNT=491 /TID=Hs.118787.0 /TIER=FL+Stack /STK=253 /UG=Hs.118787 /LL=7045 /DEF=Homo sapiens transforming growth factor, beta-induced, 68kD (TGFBI), mRNA. /PROD=transforming growth factor, beta-induced, 68kD /FL=gb:NM_000358.1 gb:M77349.1 gb:BC000097.1 gb:BC004972.1
TRIB1	4.00277e-09	4.26084e-11	2.11896	1.08336	2.11896	up	1.9838	0.988267	1.9838	up	1.43918	0.525251	1.43918	up	1.82721	0.869642	1.82721	up	1.74887	0.806419	1.74887	up	2.92558	1.54872	2.92558	up	1.98791	0.991252	1.98791	up		10221	Hs.444947	gb:NM_025195.1 /DB_XREF=gi:13399327 /GEN=C8FW /FEA=FLmRNA /CNT=184 /TID=Hs.7837.0 /TIER=FL+Stack /STK=96 /UG=Hs.7837 /LL=10221 /DEF=Homo sapiens phosphoprotein regulated by mitogenic pathways (C8FW), mRNA. /PROD=G-protein-coupled receptor induced protein /FL=gb:AF205437.1 gb:NM_025195.1
N4BP2L2	4.00277e-09	4.24108e-11	-1.41871	-0.504581	1.41871	down	-2.1919	-1.13218	2.1919	down	-1.63611	-0.710266	1.63611	down	-1.87299	-0.905344	1.87299	down	-1.69525	-0.761498	1.69525	down	-2.24461	-1.16647	2.24461	down	-2.55763	-1.35481	2.55763	down		10443	Hs.507680	gb:NM_014887.1 /DB_XREF=gi:7656970 /GEN=CG005 /FEA=FLmRNA /CNT=180 /TID=Hs.23518.0 /TIER=FL+Stack /STK=30 /UG=Hs.23518 /LL=10443 /DEF=Homo sapiens hypothetical protein from BCRA2 region (CG005), mRNA. /PROD=hypothetical protein from BCRA2 region /FL=gb:NM_014887.1
PYGL	4.00277e-09	4.25481e-11	3.2959	1.72067	3.2959	up	2.67995	1.42221	2.67995	up	3.05717	1.6122	3.05717	up	4.15908	2.05626	4.15908	up	3.12412	1.64345	3.12412	up	3.56607	1.83433	3.56607	up	3.9337	1.97589	3.9337	up		5836	Hs.282417	gb:NM_002863.1 /DB_XREF=gi:4506352 /GEN=PYGL /FEA=FLmRNA /CNT=104 /TID=Hs.771.0 /TIER=FL /STK=0 /UG=Hs.771 /LL=5836 /DEF=Homo sapiens phosphorylase, glycogen; liver (Hers disease, glycogen storage disease type VI) (PYGL), mRNA. /PROD=phosphorylase, glycogen; liver (Hers disease,glycogen storage disease type VI) /FL=gb:AF066858.1 gb:M14636.1 gb:AF046785.1 gb:NM_002863.1
HSPA1A///HSPA1B	4.03524e-09	4.30278e-11	1.99729	0.998047	1.99729	up	1.79859	0.84687	1.79859	up	1.77632	0.828894	1.77632	up	2.14293	1.09959	2.14293	up	1.86757	0.90116	1.86757	up	2.49179	1.31718	2.49179	up	2.36917	1.24438	2.36917	up		3303///3304	Hs.274402///Hs.743411	gb:NM_005345.3 /DB_XREF=gi:5579469 /GEN=HSPA1A /FEA=FLmRNA /CNT=432 /TID=Hs.8997.0 /TIER=FL+Stack /STK=165 /UG=Hs.8997 /LL=3303 /DEF=Homo sapiens heat shock 70kD protein 1A (HSPA1A), mRNA. /PROD=heat shock 70kD protein 1A /FL=gb:BC002453.1 gb:NM_005345.3
DOCK9	4.03958e-09	4.3148e-11	-2.06935	-1.04918	2.06935	down	-2.14809	-1.10306	2.14809	down	-1.92799	-0.9471	1.92799	down	-2.53622	-1.34268	2.53622	down	-1.92259	-0.943048	1.92259	down	-2.63698	-1.39889	2.63698	down	-2.8981	-1.53511	2.8981	down		23348	Hs.596105	gb:AL576253 /DB_XREF=gi:12938214 /DB_XREF=AL576253 /CLONE=CS0DI073YM22 (3 prime) /FEA=mRNA /CNT=104 /TID=Hs.8021.0 /TIER=Stack /STK=10 /UG=Hs.8021 /LL=23348 /UG_GENE=KIAA1058 /UG_TITLE=KIAA1058 protein
AGTRAP	4.06202e-09	4.34619e-11	1.79625	0.844989	1.79625	up	2.74321	1.45587	2.74321	up	2.22549	1.15412	2.22549	up	2.82155	1.49649	2.82155	up	2.38975	1.25686	2.38975	up	2.74956	1.4592	2.74956	up	3.3141	1.72862	3.3141	up		57085	Hs.464438///Hs.550061	gb:AF165187.1 /DB_XREF=gi:9621815 /TID=Hs2.12854.2 /CNT=1 /FEA=FLmRNA /TIER=FL /STK=1 /LL=57085 /UG_GENE=AGTRAP /UG=Hs.12854 /DEF=Homo sapiens ATRAP mRNA, complete cds. /PROD=ATRAP /FL=gb:AF165187.1
CFLAR	4.21428e-09	4.51681e-11	1.27221	0.347341	1.27221	up	1.20005	0.263097	1.20005	up	1.25841	0.331601	1.25841	up	1.33403	0.415796	1.33403	up	1.39163	0.476779	1.39163	up	1.48188	0.567429	1.48188	up	1.57853	0.658578	1.57853	up		8837	Hs.731912	gb:AA971429 /DB_XREF=gi:3146719 /DB_XREF=op92f09.s1 /CLONE=IMAGE:1584329 /FEA=EST /CNT=5 /TID=Hs.166913.0 /TIER=ConsEnd /STK=5 /UG=Hs.166913 /UG_TITLE=ESTs
ALOX5AP	4.24474e-09	4.55723e-11	2.38842	1.25605	2.38842	up	2.12445	1.08709	2.12445	up	1.89495	0.922163	1.89495	up	2.41604	1.27265	2.41604	up	2.04324	1.03086	2.04324	up	2.63781	1.39934	2.63781	up	2.36176	1.23986	2.36176	up		241	Hs.507658	gb:NM_001629.1 /DB_XREF=gi:4502058 /GEN=ALOX5AP /FEA=FLmRNA /CNT=88 /TID=Hs.100194.0 /TIER=FL /STK=0 /UG=Hs.100194 /LL=241 /DEF=Homo sapiens arachidonate 5-lipoxygenase-activating protein (ALOX5AP), mRNA. /PROD=arachidonate 5-lipoxygenase-activating protein /FL=gb:NM_001629.1
SMARCD3	4.27474e-09	4.62e-11	1.32303	0.403843	1.32303	up	2.08512	1.06013	2.08512	up	2.18022	1.12448	2.18022	up	2.43252	1.28245	2.43252	up	2.56244	1.35752	2.56244	up	2.17037	1.11794	2.17037	up	3.39918	1.76519	3.39918	up		6604	Hs.647067	gb:NM_003078.1 /DB_XREF=gi:4507086 /GEN=SMARCD3 /FEA=FLmRNA /CNT=98 /TID=Hs.71622.0 /TIER=FL+Stack /STK=44 /UG=Hs.71622 /LL=6604 /DEF=Homo sapiens SWISNF related, matrix associated, actin dependent regulator of chromatin, subfamily d, member 3 (SMARCD3), mRNA. /PROD=SWISNF related, matrix associated, actindependent regulator of chromatin, subfamily d, member 3 /FL=gb:NM_003078.1 gb:BC002628.1 gb:…
TCN1	4.27474e-09	4.61728e-11	5.29842	2.40556	5.29842	up	3.3593	1.74816	3.3593	up	3.84849	1.94429	3.84849	up	4.00478	2.00172	4.00478	up	5.34125	2.41718	5.34125	up	8.64014	3.11105	8.64014	up	6.12131	2.61384	6.12131	up		6947	Hs.2012	gb:NM_001062.1 /DB_XREF=gi:4507406 /GEN=TCN1 /FEA=FLmRNA /CNT=36 /TID=Hs.2012.0 /TIER=FL+Stack /STK=8 /UG=Hs.2012 /LL=6947 /DEF=Homo sapiens transcobalamin I (vitamin B12 binding protein, R binder family) (TCN1), mRNA. /PROD=transcobalamin I (vitamin B12 binding protein, Rbinder family) /FL=gb:NM_001062.1 gb:J05068.1
HIST1H1C	4.27474e-09	4.62071e-11	1.50511	0.589868	1.50511	up	2.27789	1.1877	2.27789	up	2.76463	1.46709	2.76463	up	2.23174	1.15817	2.23174	up	2.95136	1.56138	2.95136	up	2.71632	1.44166	2.71632	up	3.41841	1.77333	3.41841	up		3006	Hs.7644	gb:BC002649.1 /DB_XREF=gi:12803628 /FEA=FLmRNA /CNT=154 /TID=Hs.7644.0 /TIER=FL+Stack /STK=86 /UG=Hs.7644 /LL=3006 /UG_GENE=H1F2 /DEF=Homo sapiens, H1 histone family, member 2, clone MGC:3992, mRNA, complete cds. /PROD=H1 histone family, member 2 /FL=gb:BC002649.1 gb:NM_005319.1
EOMES	4.27474e-09	4.5983e-11	-2.99731	-1.58367	2.99731	down	-2.77206	-1.47096	2.77206	down	-2.95452	-1.56292	2.95452	down	-3.33407	-1.73728	3.33407	down	-2.20982	-1.14393	2.20982	down	-3.4402	-1.78249	3.4402	down	-3.58968	-1.84386	3.58968	down		8320	Hs.591663	gb:NM_005442.1 /DB_XREF=gi:11321608 /GEN=EOMES /FEA=FLmRNA /CNT=12 /TID=Hs.301704.0 /TIER=ConsEnd /STK=0 /UG=Hs.301704 /LL=8320 /DEF=Homo sapiens eomesodermin (Xenopus laevis) homolog (EOMES), mRNA. /PROD=eomesodermin (Xenopus laevis) homolog /FL=gb:AB031038.1 gb:NM_005442.1
LRRN3	4.31402e-09	4.67105e-11	-5.71658	-2.51515	5.71658	down	-2.72821	-1.44795	2.72821	down	-3.83191	-1.93806	3.83191	down	-5.78481	-2.53227	5.78481	down	-3.84522	-1.94307	3.84522	down	-7.54631	-2.91577	7.54631	down	-5.90155	-2.56109	5.90155	down		54674	Hs.3781	gb:AI221950 /DB_XREF=gi:3804153 /DB_XREF=qh01b02.x1 /CLONE=IMAGE:1843371 /FEA=FLmRNA /CNT=66 /TID=Hs.3781.0 /TIER=Stack /STK=15 /UG=Hs.3781 /LL=54674 /UG_GENE=FLJ11129 /UG_TITLE=similar to murine leucine-rich repeat protein /FL=gb:AL442092.1
PCYT1A	4.31862e-09	4.68393e-11	2.05353	1.03811	2.05353	up	1.44357	0.529646	1.44357	up	1.39887	0.484264	1.39887	up	1.8893	0.917854	1.8893	up	1.47972	0.565322	1.47972	up	2.0191	1.01371	2.0191	up	1.99903	0.999297	1.99903	up		5130	Hs.135997	gb:AI638771 /DB_XREF=gi:4691005 /DB_XREF=tt32b06.x1 /CLONE=IMAGE:2242451 /FEA=FLmRNA /CNT=68 /TID=Hs.273558.0 /TIER=Stack /STK=9 /UG=Hs.273558 /LL=5130 /UG_GENE=PCYT1A /UG_TITLE=phosphate cytidylyltransferase 1, choline, alpha isoform /FL=gb:L28957.1 gb:NM_005017.1
HIPK1	4.35511e-09	4.73148e-11	1.83595	0.87653	1.83595	up	2.76496	1.46726	2.76496	up	2.55134	1.35126	2.55134	up	2.53053	1.33944	2.53053	up	1.9276	0.946808	1.9276	up	2.22197	1.15184	2.22197	up	3.09027	1.62773	3.09027	up		204851	Hs.532363	gb:AI393355 /DB_XREF=gi:4222902 /DB_XREF=tg44d05.x1 /CLONE=IMAGE:2111625 /FEA=mRNA /CNT=205 /TID=Hs.12259.0 /TIER=Stack /STK=10 /UG=Hs.12259 /LL=23323 /UG_GENE=KIAA0630 /UG_TITLE=KIAA0630 protein
VASP	4.41274e-09	4.80216e-11	1.50024	0.585193	1.50024	up	1.68819	0.755474	1.68819	up	1.58958	0.668648	1.58958	up	1.87544	0.907232	1.87544	up	1.32393	0.404829	1.32393	up	1.88835	0.917124	1.88835	up	2.08714	1.06153	2.08714	up		7408	Hs.515469	gb:NM_003370.1 /DB_XREF=gi:4507868 /GEN=VASP /FEA=FLmRNA /CNT=161 /TID=Hs.93183.0 /TIER=FL+Stack /STK=37 /UG=Hs.93183 /LL=7408 /DEF=Homo sapiens vasodilator-stimulated phosphoprotein (VASP), mRNA. /PROD=vasodilator-stimulated phosphoprotein /FL=gb:NM_003370.1
IL11RA	4.44756e-09	4.84936e-11	-1.59031	-0.669312	1.59031	down	-1.599	-0.677172	1.599	down	-1.49026	-0.575561	1.49026	down	-1.70986	-0.773877	1.70986	down	-1.39479	-0.480048	1.39479	down	-1.77251	-0.825795	1.77251	down	-1.62852	-0.703565	1.62852	down		3590	Hs.591088	gb:NM_004512.1 /DB_XREF=gi:4758593 /GEN=IL11RA /FEA=FLmRNA /CNT=70 /TID=Hs.64310.0 /TIER=FL+Stack /STK=34 /UG=Hs.64310 /LL=3590 /DEF=Homo sapiens interleukin 11 receptor, alpha (IL11RA), mRNA. /PROD=interleukin 11 receptor, alpha /FL=gb:U32324.1 gb:NM_004512.1 gb:BC003110.1
ITGAM	4.44756e-09	4.86445e-11	2.38252	1.25249	2.38252	up	2.1347	1.09404	2.1347	up	1.9249	0.944781	1.9249	up	2.83501	1.50335	2.83501	up	2.07054	1.05001	2.07054	up	2.88888	1.53051	2.88888	up	2.78876	1.47962	2.78876	up		3684	Hs.172631	gb:NM_000632.2 /DB_XREF=gi:6006013 /GEN=ITGAM /FEA=FLmRNA /CNT=40 /TID=Hs.172631.0 /TIER=FL /STK=1 /UG=Hs.172631 /LL=3684 /DEF=Homo sapiens integrin, alpha M (complement component receptor 3, alpha; also known as CD11b (p170), macrophage antigen alpha polypeptide) (ITGAM), mRNA. /PROD=integrin alpha M precursor /FL=gb:NM_000632.2 gb:J03925.1
SLC9A1	4.44756e-09	4.8621e-11	1.06488	0.0906911	1.06488	up	1.43227	0.518306	1.43227	up	1.14138	0.190779	1.14138	up	1.36347	0.447288	1.36347	up	1.35751	0.440963	1.35751	up	1.36139	0.445079	1.36139	up	1.56687	0.647881	1.56687	up		6548	Hs.469116	gb:M81768.1 /DB_XREF=gi:178752 /GEN=APNH /FEA=FLmRNA /CNT=122 /TID=Hs.170222.0 /TIER=FL+Stack /STK=39 /UG=Hs.170222 /LL=6548 /DEF=Human NaH antiporter (APNH1) mRNA, complete cds. /PROD=NaH antiporter /FL=gb:AF141356.1 gb:AF141358.1 gb:AF141352.1 gb:AF141359.1 gb:AF141355.1 gb:AF141357.1 gb:AF141353.1 gb:AF141350.1 gb:AF141354.1 gb:AF141351.1 gb:M81768.1 gb:AF146434.1 gb:AF146435.1 gb:AF146436.1 g…
	4.48178e-09	4.91008e-11	-1.66405	-0.734698	1.66405	down	-1.45156	-0.537609	1.45156	down	-1.46117	-0.547124	1.46117	down	-1.83469	-0.875533	1.83469	down	-1.50419	-0.588985	1.50419	down	-1.98396	-0.988387	1.98396	down	-2.08662	-1.06117	2.08662	down				gb:AW170044 /DB_XREF=gi:6401569 /DB_XREF=xj36b08.x1 /CLONE=IMAGE:2659287 /FEA=EST /CNT=11 /TID=Hs.296100.1 /TIER=Stack /STK=10 /UG=Hs.296100 /UG_TITLE=ESTs
CST7	4.53116e-09	4.97247e-11	3.39739	1.76443	3.39739	up	3.00902	1.58929	3.00902	up	2.04841	1.0345	2.04841	up	3.81411	1.93135	3.81411	up	2.66036	1.41162	2.66036	up	4.24013	2.08411	4.24013	up	4.32261	2.1119	4.32261	up		8530	Hs.143212	gb:AF031824.1 /DB_XREF=gi:3252857 /FEA=FLmRNA /CNT=26 /TID=Hs.143212.0 /TIER=FL+Stack /STK=10 /UG=Hs.143212 /LL=8530 /UG_GENE=CST7 /DEF=Homo sapiens leukocystatin mRNA, complete cds. /PROD=leukocystatin /FL=gb:AF036342.1 gb:NM_003650.1 gb:AF031824.1 gb:AB015225.1
INPP4B	4.54455e-09	4.99547e-11	-3.20827	-1.6818	3.20827	down	-3.35315	-1.74552	3.35315	down	-2.34291	-1.2283	2.34291	down	-3.97104	-1.98952	3.97104	down	-2.45242	-1.2942	2.45242	down	-4.36344	-2.12547	4.36344	down	-4.55654	-2.18794	4.55654	down		8821		gb:AA456099 /DB_XREF=gi:2178875 /DB_XREF=aa17e01.s1 /CLONE=IMAGE:813528 /FEA=EST /CNT=21 /TID=Hs.176376.0 /TIER=ConsEnd /STK=6 /UG=Hs.176376 /UG_TITLE=ESTs
WDR89	4.5532e-09	5.01331e-11	-1.54277	-0.625523	1.54277	down	-1.74416	-0.802535	1.74416	down	-1.36699	-0.451006	1.36699	down	-1.75076	-0.807978	1.75076	down	-1.38724	-0.472215	1.38724	down	-1.8973	-0.92395	1.8973	down	-1.91029	-0.93379	1.91029	down		112840	Hs.655666///Hs.741323	gb:AW069315 /DB_XREF=gi:6024313 /DB_XREF=cr44b02.x1 /CLONE=HBMSC_cr44b02 /FEA=EST /CNT=5 /TID=Hs.202737.1 /TIER=ConsEnd /STK=1 /UG=Hs.202737 /UG_TITLE=ESTs
LFNG	4.63144e-09	5.10793e-11	-2.06818	-1.04836	2.06818	down	-1.7747	-0.827575	1.7747	down	-1.60078	-0.678775	1.60078	down	-1.87714	-0.908536	1.87714	down	-1.55561	-0.637478	1.55561	down	-2.09349	-1.06591	2.09349	down	-1.76366	-0.818572	1.76366	down		3955	Hs.159142	gb:AW151924 /DB_XREF=gi:6199744 /DB_XREF=xf70d01.x1 /CLONE=IMAGE:2623393 /FEA=EST /CNT=15 /TID=Hs.30701.0 /TIER=Stack /STK=9 /UG=Hs.30701 /UG_TITLE=ESTs
AHSA2	4.63292e-09	5.11803e-11	-1.87256	-0.905012	1.87256	down	-2.24019	-1.16362	2.24019	down	-1.69248	-0.759143	1.69248	down	-2.26029	-1.17651	2.26029	down	-1.59326	-0.671981	1.59326	down	-2.59043	-1.37319	2.59043	down	-2.45782	-1.29738	2.45782	down		130872		gb:AI986239 /DB_XREF=gi:5813516 /DB_XREF=wr81e03.x1 /CLONE=IMAGE:2494108 /FEA=EST /CNT=47 /TID=Hs.180948.0 /TIER=Stack /STK=23 /UG=Hs.180948 /LL=23021 /UG_GENE=KIAA0729 /UG_TITLE=KIAA0729 protein
SLA	4.70179e-09	5.20271e-11	2.36784	1.24357	2.36784	up	2.60147	1.37933	2.60147	up	1.94484	0.95965	1.94484	up	2.59849	1.37767	2.59849	up	1.64589	0.718868	1.64589	up	2.58726	1.37142	2.58726	up	2.44999	1.29278	2.44999	up		6503	Hs.75367	gb:U44403.1 /DB_XREF=gi:1809245 /FEA=FLmRNA /CNT=86 /TID=Hs.75367.0 /TIER=FL+Stack /STK=26 /UG=Hs.75367 /LL=6503 /UG_GENE=SLA /DEF=Human Src-like adapter protein mRNA, complete cds. /PROD=Src-like adapter protein /FL=gb:NM_006748.1 gb:D89077.1 gb:U30473.1 gb:U44403.1
AGFG1	4.8372e-09	5.3614e-11	3.41992	1.77396	3.41992	up	3.07659	1.62133	3.07659	up	2.6701	1.41689	2.6701	up	3.603	1.8492	3.603	up	2.38993	1.25697	2.38993	up	3.86479	1.95039	3.86479	up	3.76047	1.91091	3.76047	up		3267	Hs.352962	gb:AI742626 /DB_XREF=gi:5110914 /DB_XREF=wg44c03.x1 /CLONE=IMAGE:2367940 /FEA=EST /CNT=44 /TID=Hs.171545.1 /TIER=ConsEnd /STK=0 /UG=Hs.171545 /LL=3267 /UG_GENE=HRB /UG_TITLE=HIV-1 Rev binding protein
ADCY3	4.84233e-09	5.37594e-11	1.54134	0.624182	1.54134	up	1.52595	0.609704	1.52595	up	1.37601	0.460491	1.37601	up	1.8644	0.898714	1.8644	up	1.52953	0.613084	1.52953	up	2.64019	1.40064	2.64019	up	2.48355	1.3124	2.48355	up		109	Hs.467898	gb:AF033861.1 /DB_XREF=gi:4104225 /GEN=AC-III /FEA=FLmRNA /CNT=147 /TID=Hs.8402.0 /TIER=FL /STK=0 /UG=Hs.8402 /LL=109 /DEF=Homo sapiens type III adenylyl cyclase (AC-III) mRNA, complete cds. /PROD=type III adenylyl cyclase /FL=gb:AF033861.1 gb:NM_004036.2
OFD1	4.84724e-09	5.39025e-11	-1.55155	-0.633713	1.55155	down	-1.91167	-0.934834	1.91167	down	-1.69858	-0.764327	1.69858	down	-1.92783	-0.946977	1.92783	down	-1.59315	-0.67188	1.59315	down	-2.13038	-1.09111	2.13038	down	-2.2373	-1.16176	2.2373	down		8481	Hs.6483	gb:NM_003611.1 /DB_XREF=gi:4503178 /GEN=CXORF5 /FEA=FLmRNA /CNT=107 /TID=Hs.6483.0 /TIER=FL+Stack /STK=12 /UG=Hs.6483 /LL=8481 /DEF=Homo sapiens chromosome X open reading frame 5 (CXORF5), mRNA. /PROD=chromosome X open reading frame 5 /FL=gb:NM_003611.1
COX16///SYNJ2BP-COX16	4.85103e-09	5.40334e-11	-1.32066	-0.40126	1.32066	down	-1.24111	-0.311633	1.24111	down	-1.37422	-0.458615	1.37422	down	-1.72829	-0.789346	1.72829	down	-1.42068	-0.506579	1.42068	down	-1.71326	-0.776743	1.71326	down	-1.72617	-0.787576	1.72617	down		51241///100529257	Hs.709581	gb:AW088547 /DB_XREF=gi:6044358 /DB_XREF=xd17c08.x1 /CLONE=IMAGE:2594030 /FEA=EST /CNT=4 /TID=Hs.312076.0 /TIER=ConsEnd /STK=3 /UG=Hs.312076 /UG_TITLE=ESTs, Moderately similar to ALU2_HUMAN ALU SUBFAMILY SB SEQUENCE CONTAMINATION WARNING ENTRY (H.sapiens)
	4.91776e-09	5.48667e-11	-1.38026	-0.464945	1.38026	down	-1.57831	-0.658377	1.57831	down	-1.38163	-0.466367	1.38163	down	-1.56997	-0.650736	1.56997	down	-1.41014	-0.495837	1.41014	down	-1.61268	-0.68946	1.61268	down	-1.72171	-0.783839	1.72171	down			Hs.654763	gb:BF940010 /DB_XREF=gi:12357330 /DB_XREF=nac66a01.x1 /CLONE=IMAGE:3439009 /FEA=EST /CNT=19 /TID=Hs.119338.0 /TIER=Stack /STK=13 /UG=Hs.119338 /UG_TITLE=ESTs
NMT2	4.95274e-09	5.54319e-11	-3.09819	-1.63143	3.09819	down	-2.75387	-1.46146	2.75387	down	-2.307	-1.20602	2.307	down	-3.27024	-1.7094	3.27024	down	-1.89606	-0.923004	1.89606	down	-3.71137	-1.89195	3.71137	down	-3.20513	-1.68038	3.20513	down		9397	Hs.60339	gb:AW293531 /DB_XREF=gi:6700167 /DB_XREF=UI-H-BI2-ahq-d-03-0-UI.s1 /CLONE=IMAGE:2727604 /FEA=FLmRNA /CNT=40 /TID=Hs.122647.0 /TIER=Stack /STK=11 /UG=Hs.122647 /LL=9397 /UG_GENE=NMT2 /UG_TITLE=N-myristoyltransferase 2 /FL=gb:NM_004808.1 gb:AF043325.1
FAM129A	4.95274e-09	5.54381e-11	2.87968	1.52591	2.87968	up	4.35137	2.12147	4.35137	up	3.33824	1.73909	3.33824	up	3.84654	1.94356	3.84654	up	2.44186	1.28798	2.44186	up	3.23271	1.69274	3.23271	up	3.9559	1.98401	3.9559	up		116496	Hs.518662	gb:NM_022083.1 /DB_XREF=gi:11545796 /GEN=NIBAN /FEA=FLmRNA /CNT=189 /TID=Hs.48778.0 /TIER=FL /STK=5 /UG=Hs.48778 /LL=63911 /DEF=Homo sapiens niban protein (NIBAN), mRNA. /PROD=niban protein /FL=gb:AF288391.1 gb:AB050477.1 gb:NM_022083.1
MARCKS	4.96354e-09	5.56498e-11	2.57547	1.36484	2.57547	up	2.62902	1.39452	2.62902	up	1.73811	0.797518	1.73811	up	2.21555	1.14766	2.21555	up	1.70404	0.768956	1.70404	up	2.54158	1.34572	2.54158	up	2.36936	1.2445	2.36936	up		4082	Hs.519909	gb:AA770596 /DB_XREF=gi:2821834 /DB_XREF=oe54a06.s1 /CLONE=IMAGE:1415410 /FEA=EST /CNT=148 /TID=Hs.75607.1 /TIER=Stack /STK=9 /UG=Hs.75607 /LL=4082 /UG_GENE=MACS /UG_TITLE=myristoylated alanine-rich protein kinase C substrate (MARCKS, 80K-L)
UBE2G2	4.97783e-09	5.5901e-11	-1.58353	-0.663141	1.58353	down	-1.66963	-0.739529	1.66963	down	-1.60183	-0.679723	1.60183	down	-1.66757	-0.737749	1.66757	down	-1.4004	-0.485838	1.4004	down	-1.67743	-0.746252	1.67743	down	-1.71836	-0.781034	1.71836	down		7327	Hs.529420///Hs.684565	gb:BC035653.1 /DB_XREF=gi:23272801 /TID=Hs2.406136.1 /CNT=13 /FEA=mRNA /TIER=ConsEnd /STK=1 /UG=Hs.406136 /UG_TITLE=Homo sapiens, clone IMAGE:5587663, mRNA /DEF=Homo sapiens, clone IMAGE:5587663, mRNA.
NLRP1	4.98613e-09	5.60854e-11	-1.64462	-0.717751	1.64462	down	-1.65482	-0.72667	1.65482	down	-1.25682	-0.329776	1.25682	down	-1.44072	-0.526787	1.44072	down	-1.39924	-0.484644	1.39924	down	-2.16179	-1.11222	2.16179	down	-1.59857	-0.67678	1.59857	down		22861	Hs.652273	gb:AF229062.1 /DB_XREF=gi:12656110 /GEN=NAC /FEA=FLmRNA /CNT=1 /TID=Hs.104305.1 /TIER=FL /STK=0 /UG=Hs.104305 /LL=22861 /DEF=Homo sapiens NAC-delta splice variant (NAC) mRNA, complete cds, alternatively spliced. /PROD=NAC-delta splice variant /FL=gb:AF229062.1
SMYD2	5.07749e-09	5.72059e-11	-2.00084	-1.00061	2.00084	down	-2.06695	-1.04751	2.06695	down	-1.85942	-0.894849	1.85942	down	-2.11003	-1.07726	2.11003	down	-1.63858	-0.712448	1.63858	down	-2.23613	-1.161	2.23613	down	-2.29734	-1.19997	2.29734	down		56950	Hs.66170	gb:AI809870 /DB_XREF=gi:5396436 /DB_XREF=wf59c03.x1 /CLONE=IMAGE:2359876 /FEA=mRNA /CNT=80 /TID=Hs.66170.1 /TIER=Stack /STK=55 /UG=Hs.66170 /LL=56950 /UG_GENE=HSKM-B /UG_TITLE=HSKM-B protein
HIP1	5.08333e-09	5.73646e-11	1.86917	0.902399	1.86917	up	1.54223	0.625022	1.54223	up	1.4552	0.541218	1.4552	up	1.93517	0.952458	1.93517	up	1.34272	0.425155	1.34272	up	2.1548	1.10756	2.1548	up	2.15536	1.10793	2.15536	up		3092	Hs.329266	gb:U79734.1 /DB_XREF=gi:2072422 /GEN=HIP1 /FEA=FLmRNA /CNT=54 /TID=Hs.97206.0 /TIER=FL /STK=0 /UG=Hs.97206 /LL=3092 /DEF=Human huntingtin interacting protein (HIP1) mRNA, complete cds. /PROD=huntingtin interacting protein 1 /FL=gb:U79734.1 gb:NM_005338.3
	5.10831e-09	5.774e-11	4.68237	2.22724	4.68237	up	5.471	2.4518	5.471	up	2.67202	1.41793	2.67202	up	3.47403	1.79661	3.47403	up	2.28304	1.19095	2.28304	up	4.37992	2.1309	4.37992	up	3.50528	1.80953	3.50528	up			Hs.671285	gb:AI984040 /DB_XREF=gi:5811259 /DB_XREF=wt52f10.x1 /CLONE=IMAGE:2511115 /FEA=EST /CNT=4 /TID=Hs.226946.0 /TIER=ConsEnd /STK=3 /UG=Hs.226946 /UG_TITLE=ESTs
TIMP1	5.16554e-09	5.85914e-11	2.13288	1.09281	2.13288	up	2.59441	1.3754	2.59441	up	1.98999	0.992765	1.98999	up	2.54706	1.34883	2.54706	up	2.23915	1.16295	2.23915	up	2.79608	1.48341	2.79608	up	3.34348	1.74135	3.34348	up		7076	Hs.522632	gb:NM_003254.1 /DB_XREF=gi:4507508 /GEN=TIMP1 /FEA=FLmRNA /CNT=282 /TID=Hs.5831.0 /TIER=FL+Stack /STK=220 /UG=Hs.5831 /LL=7076 /DEF=Homo sapiens tissue inhibitor of metalloproteinase 1 (erythroid potentiating activity, collagenase inhibitor) (TIMP1), mRNA. /PROD=tissue inhibitor of metalloproteinase 1precursor /FL=gb:NM_003254.1 gb:BC000866.1 gb:M12670.1 gb:M59906.1
DBP	5.16554e-09	5.84925e-11	-1.6249	-0.70035	1.6249	down	-1.40372	-0.489255	1.40372	down	-1.35032	-0.433306	1.35032	down	-1.45829	-0.54428	1.45829	down	-1.40475	-0.490311	1.40475	down	-1.71607	-0.779104	1.71607	down	-1.57748	-0.657621	1.57748	down		1628	Hs.414480///Hs.528006	gb:U79283.1 /DB_XREF=gi:1710256 /FEA=FLmRNA /CNT=56 /TID=Hs.155402.0 /TIER=FL+Stack /STK=11 /UG=Hs.155402 /LL=1628 /UG_GENE=DBP /DEF=Human albumin D-box binding protein mRNA, complete cds. /PROD=albumin D-box binding protein /FL=gb:D28468.1 gb:NM_001352.1 gb:U06936.1 gb:U79283.1
C20orf24///TGIF2-C20orf24	5.16554e-09	5.86703e-11	1.76324	0.818231	1.76324	up	1.56295	0.644276	1.56295	up	1.56105	0.642513	1.56105	up	1.96336	0.973326	1.96336	up	1.68069	0.749052	1.68069	up	2.15638	1.10861	2.15638	up	1.96735	0.976254	1.96735	up		55969///100527943	Hs.584985	gb:AF274948.1 /DB_XREF=gi:12751060 /FEA=FLmRNA /CNT=1 /TID=HsAffx.900549.497 /TIER=FL /STK=0 /DEF=Homo sapiens PNAS-23 mRNA, complete cds. /PROD=PNAS-23 /FL=gb:AF274948.1
ERMP1	5.18276e-09	5.90361e-11	-1.30286	-0.381686	1.30286	down	-1.26781	-0.342333	1.26781	down	-1.2797	-0.35581	1.2797	down	-1.53466	-0.617918	1.53466	down	-1.32556	-0.406599	1.32556	down	-1.4457	-0.531773	1.4457	down	-1.53898	-0.621978	1.53898	down		79956	Hs.591078	gb:NM_024896.1 /DB_XREF=gi:13487920 /GEN=FLJ23309 /FEA=FLmRNA /CNT=122 /TID=Hs.87128.0 /TIER=FL /STK=0 /UG=Hs.87128 /LL=79956 /DEF=Homo sapiens hypothetical protein FLJ23309 (FLJ23309), mRNA. /PROD=hypothetical protein FLJ23309 /FL=gb:NM_024896.1
	5.18276e-09	5.90555e-11	-1.98478	-0.988982	1.98478	down	-1.87276	-0.90517	1.87276	down	-1.82809	-0.870335	1.82809	down	-2.11551	-1.081	2.11551	down	-1.80943	-0.855536	1.80943	down	-2.34245	-1.22802	2.34245	down	-2.44453	-1.28956	2.44453	down			Hs.533222	gb:N21475 /DB_XREF=gi:1126645 /DB_XREF=yx57f12.s1 /CLONE=IMAGE:265871 /FEA=EST /CNT=58 /TID=Hs.125819.3 /TIER=Stack /STK=31 /UG=Hs.125819 /LL=27292 /UG_GENE=HSA9761 /UG_TITLE=putative dimethyladenosine transferase
NCF4	5.29155e-09	6.03919e-11	2.46526	1.30174	2.46526	up	2.4396	1.28665	2.4396	up	2.19417	1.13368	2.19417	up	3.06873	1.61764	3.06873	up	2.31307	1.20981	2.31307	up	2.98754	1.57896	2.98754	up	3.35354	1.74569	3.35354	up		4689	Hs.474781	gb:NM_013416.1 /DB_XREF=gi:7382492 /GEN=NCF4 /FEA=FLmRNA /CNT=4 /TID=Hs.196352.1 /TIER=FL /STK=0 /UG=Hs.196352 /LL=4689 /DEF=Homo sapiens neutrophil cytosolic factor 4 (40kD) (NCF4), transcript variant 2, mRNA. /PROD=neutrophil cytosolic factor 4 (40kD), isoform 2 /FL=gb:BC002798.1 gb:AB025219.1 gb:NM_013416.1
MLH3	5.31025e-09	6.07404e-11	-1.29635	-0.374461	1.29635	down	-1.50675	-0.591445	1.50675	down	-1.80294	-0.850354	1.80294	down	-1.83704	-0.877382	1.83704	down	-2.00419	-1.00302	2.00419	down	-2.27823	-1.18791	2.27823	down	-2.44707	-1.29105	2.44707	down		27030	Hs.436650	gb:NM_014381.1 /DB_XREF=gi:7657336 /GEN=MLH3 /FEA=FLmRNA /CNT=58 /TID=Hs.279843.0 /TIER=FL /STK=0 /UG=Hs.279843 /LL=27030 /DEF=Homo sapiens mutL (E. coli) homolog 3 (MLH3), mRNA. /PROD=mutL (E. coli) homolog 3 /FL=gb:AF195657.1 gb:NM_014381.1
MTERF1	5.31025e-09	6.07995e-11	-1.30443	-0.383425	1.30443	down	-1.46336	-0.549283	1.46336	down	-1.36782	-0.451874	1.36782	down	-1.41293	-0.498691	1.41293	down	-1.30611	-0.385282	1.30611	down	-1.48357	-0.569068	1.48357	down	-1.52938	-0.612948	1.52938	down		7978	Hs.532216	gb:NM_006980.1 /DB_XREF=gi:5902009 /GEN=MTERF /FEA=FLmRNA /CNT=49 /TID=Hs.97996.0 /TIER=FL+Stack /STK=28 /UG=Hs.97996 /LL=7978 /DEF=Homo sapiens transcription termination factor, mitochondrial (MTERF), mRNA. /PROD=transcription termination factor, mitochondrial /FL=gb:NM_006980.1 gb:BC000965.2
CCSER2	5.35249e-09	6.13811e-11	-2.12486	-1.08737	2.12486	down	-2.07802	-1.05521	2.07802	down	-1.92294	-0.943314	1.92294	down	-2.39305	-1.25885	2.39305	down	-1.99482	-0.996261	1.99482	down	-2.28083	-1.18956	2.28083	down	-2.46214	-1.29991	2.46214	down		54462	Hs.461988	gb:AF241785.1 /DB_XREF=gi:12005486 /GEN=NPD012 /FEA=FLmRNA /CNT=138 /TID=Hs.81897.0 /TIER=FL+Stack /STK=28 /UG=Hs.81897 /LL=54462 /DEF=Homo sapiens NPD012 (NPD012) mRNA, complete cds. /PROD=NPD012 /FL=gb:AF241785.1
SH3GLB1	5.35572e-09	6.1516e-11	2.55322	1.35232	2.55322	up	1.92875	0.947667	1.92875	up	2.04374	1.03121	2.04374	up	2.78693	1.47868	2.78693	up	2.35356	1.23484	2.35356	up	2.8038	1.48738	2.8038	up	2.85498	1.51348	2.85498	up		51100	Hs.136309	gb:AF263293.1 /DB_XREF=gi:8118529 /FEA=FLmRNA /CNT=201 /TID=Hs.136309.0 /TIER=FL /STK=0 /UG=Hs.136309 /LL=51100 /UG_GENE=SH3GLB1 /DEF=Homo sapiens endophilin B1 mRNA, complete cds. /PROD=endophilin B1 /FL=gb:AF263293.1
TRMT13	5.41447e-09	6.229e-11	-2.0171	-1.01228	2.0171	down	-3.2047	-1.68019	3.2047	down	-2.12226	-1.0856	2.12226	down	-2.8231	-1.49728	2.8231	down	-1.98506	-0.989181	1.98506	down	-3.08314	-1.6244	3.08314	down	-3.68952	-1.88343	3.68952	down		54482	Hs.729095	gb:NM_019083.1 /DB_XREF=gi:11024703 /GEN=FLJ10287 /FEA=FLmRNA /CNT=53 /TID=Hs.40337.0 /TIER=FL+Stack /STK=21 /UG=Hs.40337 /LL=54482 /DEF=Homo sapiens hypothetical protein (FLJ10287), mRNA. /PROD=hypothetical protein FLJ11219 /FL=gb:NM_019083.1
FAM69A	5.52408e-09	6.36519e-11	-2.39502	-1.26004	2.39502	down	-1.91204	-0.93511	1.91204	down	-2.06524	-1.04631	2.06524	down	-2.61037	-1.38426	2.61037	down	-1.64544	-0.718473	1.64544	down	-2.85664	-1.51432	2.85664	down	-2.83987	-1.50583	2.83987	down		388650	Hs.180946	gb:AK027146.1 /DB_XREF=gi:10440199 /FEA=mRNA /CNT=2 /TID=Hs.180946.6 /TIER=ConsEnd /STK=0 /UG=Hs.180946 /LL=6125 /UG_GENE=RPL5 /UG_TITLE=ribosomal protein L5 /DEF=Homo sapiens cDNA: FLJ23493 fis, clone LNG01831, highly similar to HSU66589 Human ribosomal protein L5 pseudogene mRNA.
PLP2	5.58307e-09	6.44337e-11	1.9001	0.926079	1.9001	up	1.64259	0.715973	1.64259	up	1.52497	0.608785	1.52497	up	2.03491	1.02496	2.03491	up	1.61408	0.690716	1.61408	up	2.26532	1.17971	2.26532	up	2.34039	1.22675	2.34039	up		5355	Hs.77422	gb:NM_002668.1 /DB_XREF=gi:4505892 /GEN=PLP2 /FEA=FLmRNA /CNT=404 /TID=Hs.77422.0 /TIER=FL+Stack /STK=121 /UG=Hs.77422 /LL=5355 /DEF=Homo sapiens proteolipid protein 2 (colonic epithelium-enriched) (PLP2), mRNA. /PROD=proteolipid protein 2 (colonicepithelium-enriched) /FL=gb:NM_002668.1 gb:L09604.1
PRR5L	5.58527e-09	6.45613e-11	-2.34497	-1.22957	2.34497	down	-2.794	-1.48233	2.794	down	-2.10155	-1.07146	2.10155	down	-2.42634	-1.27878	2.42634	down	-2.16925	-1.1172	2.16925	down	-2.57173	-1.36274	2.57173	down	-2.78763	-1.47904	2.78763	down		79899	Hs.19987	gb:NM_024841.1 /DB_XREF=gi:13376254 /GEN=FLJ14213 /FEA=FLmRNA /CNT=37 /TID=Hs.183506.0 /TIER=FL /STK=1 /UG=Hs.183506 /LL=79899 /DEF=Homo sapiens hypothetical protein FLJ14213 (FLJ14213), mRNA. /PROD=hypothetical protein FLJ14213 /FL=gb:NM_024841.1
NT5E	5.64386e-09	6.55483e-11	-1.86681	-0.900574	1.86681	down	-2.1304	-1.09112	2.1304	down	-1.87569	-0.907423	1.87569	down	-2.25336	-1.17208	2.25336	down	-2.25262	-1.17161	2.25262	down	-2.71758	-1.44232	2.71758	down	-2.71025	-1.43843	2.71025	down		4907	Hs.153952	gb:NM_002526.1 /DB_XREF=gi:4505466 /GEN=NT5 /FEA=FLmRNA /CNT=96 /TID=Hs.153952.0 /TIER=FL+Stack /STK=38 /UG=Hs.153952 /LL=4907 /DEF=Homo sapiens 5 nucleotidase (CD73) (NT5), mRNA. /PROD=5 nucleotidase /FL=gb:NM_002526.1
PNISR	5.64386e-09	6.53709e-11	-1.73365	-0.793813	1.73365	down	-2.8637	-1.51788	2.8637	down	-1.91078	-0.934159	1.91078	down	-2.53051	-1.33943	2.53051	down	-2.06947	-1.04926	2.06947	down	-3.00046	-1.58518	3.00046	down	-3.78738	-1.9212	3.78738	down		25957		gb:AW157501 /DB_XREF=gi:6228902 /DB_XREF=au83a02.x1 /CLONE=IMAGE:2782826 /FEA=mRNA /CNT=189 /TID=Hs.18368.2 /TIER=Stack /STK=23 /UG=Hs.18368 /LL=25957 /UG_GENE=DKFZP564B0769 /UG_TITLE=DKFZP564B0769 protein
METTL7B	5.64386e-09	6.54925e-11	2.60036	1.37871	2.60036	up	2.58127	1.36808	2.58127	up	2.04696	1.03349	2.04696	up	2.6879	1.42648	2.6879	up	2.20802	1.14275	2.20802	up	4.48553	2.16528	4.48553	up	4.43075	2.14755	4.43075	up		196410	Hs.51483	gb:AI827972 /DB_XREF=gi:5448730 /DB_XREF=wk31c11.x1 /CLONE=IMAGE:2413940 /FEA=EST /CNT=33 /TID=Hs.51483.0 /TIER=Stack /STK=18 /UG=Hs.51483 /UG_TITLE=ESTs, Weakly similar to hypothetical protein (H.sapiens)
MTX3	5.65182e-09	6.57441e-11	-1.98301	-0.987691	1.98301	down	-2.19198	-1.13223	2.19198	down	-1.85989	-0.895219	1.85989	down	-2.44988	-1.29271	2.44988	down	-1.78352	-0.834725	1.78352	down	-2.5643	-1.35857	2.5643	down	-2.80109	-1.48599	2.80109	down		345778	Hs.531418	gb:AI743044 /DB_XREF=gi:5111332 /DB_XREF=wg85d12.x1 /CLONE=IMAGE:2371895 /FEA=EST /CNT=45 /TID=Hs.45245.0 /TIER=Stack /STK=18 /UG=Hs.45245 /UG_TITLE=ESTs
ZNF570	5.69806e-09	6.63862e-11	-1.41729	-0.503139	1.41729	down	-1.28197	-0.358366	1.28197	down	-1.37122	-0.455456	1.37122	down	-1.47699	-0.562661	1.47699	down	-1.28802	-0.365155	1.28802	down	-1.47415	-0.55988	1.47415	down	-1.57002	-0.650781	1.57002	down		148268		gb:AI733145 /DB_XREF=gi:5054258 /DB_XREF=ol91d05.x5 /CLONE=IMAGE:1536969 /FEA=EST /CNT=9 /TID=Hs.126962.0 /TIER=Stack /STK=9 /UG=Hs.126962 /UG_TITLE=ESTs
RPS6KA5	5.70144e-09	6.65299e-11	-2.02488	-1.01784	2.02488	down	-1.5586	-0.640251	1.5586	down	-1.24284	-0.313646	1.24284	down	-2.014	-1.01006	2.014	down	-1.53953	-0.622486	1.53953	down	-2.67312	-1.41852	2.67312	down	-2.03971	-1.02836	2.03971	down		9252	Hs.510225	gb:AF074393.1 /DB_XREF=gi:3411156 /GEN=MSK1 /FEA=FLmRNA /CNT=59 /TID=Hs.109058.0 /TIER=FL+Stack /STK=13 /UG=Hs.109058 /LL=9252 /DEF=Homo sapiens nuclear mitogen- and stress-activated protein kinase-1 (MSK1) mRNA, complete cds. /PROD=nuclear mitogen- and stress-activated proteinkinase-1 /FL=gb:AF074393.1 gb:AF090421.1 gb:NM_004755.1 gb:AF080000.1
	5.74538e-09	6.71477e-11	-3.1875	-1.67242	3.1875	down	-3.09409	-1.62952	3.09409	down	-2.78215	-1.4762	2.78215	down	-3.75648	-1.90938	3.75648	down	-2.39225	-1.25837	2.39225	down	-3.99477	-1.99811	3.99477	down	-4.13643	-2.04839	4.13643	down			Hs.96886	gb:AI923633 /DB_XREF=gi:5659597 /DB_XREF=wn48c03.x1 /CLONE=IMAGE:2448676 /FEA=EST /CNT=10 /TID=Hs.96886.0 /TIER=Stack /STK=9 /UG=Hs.96886 /UG_TITLE=ESTs
SRSF8	5.81274e-09	6.80412e-11	-1.59741	-0.675736	1.59741	down	-1.74188	-0.800644	1.74188	down	-1.28357	-0.360166	1.28357	down	-1.57117	-0.651838	1.57117	down	-1.264	-0.337992	1.264	down	-1.84703	-0.885207	1.84703	down	-2.01308	-1.00941	2.01308	down		10929	Hs.476680	gb:AA524274 /DB_XREF=gi:2265202 /DB_XREF=ng34d08.s1 /CLONE=IMAGE:936687 /FEA=mRNA /CNT=14 /TID=Hs.155160.2 /TIER=ConsEnd /STK=0 /UG=Hs.155160 /LL=10929 /UG_GENE=SRP46 /UG_TITLE=Splicing factor, arginineserine-rich, 46kD
PLSCR1	5.90737e-09	6.92569e-11	3.53853	1.82315	3.53853	up	1.94792	0.961932	1.94792	up	1.67688	0.745783	1.67688	up	2.69495	1.43026	2.69495	up	1.7912	0.840923	1.7912	up	3.57141	1.83649	3.57141	up	2.14986	1.10424	2.14986	up		5359	Hs.130759	gb:NM_021105.1 /DB_XREF=gi:10863876 /GEN=PLSCR1 /FEA=FLmRNA /CNT=275 /TID=Hs.198282.0 /TIER=FL+Stack /STK=30 /UG=Hs.198282 /LL=5359 /DEF=Homo sapiens phospholipid scramblase 1 (PLSCR1), mRNA. /PROD=phospholipid scramblase 1 /FL=gb:AB006746.1 gb:NM_021105.1 gb:AF098642.1
LOC728392	6.06843e-09	7.12562e-11	-1.60993	-0.687001	1.60993	down	-1.54063	-0.623524	1.54063	down	-1.15982	-0.213898	1.15982	down	-1.50624	-0.590955	1.50624	down	-1.1961	-0.258342	1.1961	down	-2.0752	-1.05325	2.0752	down	-1.56791	-0.648844	1.56791	down		728392	Hs.104305	gb:NM_021730.1 /DB_XREF=gi:11119423 /GEN=PP1044 /FEA=FLmRNA /CNT=127 /TID=Hs.7212.0 /TIER=FL /STK=0 /UG=Hs.7212 /LL=60368 /DEF=Homo sapiens hypothetical protein PP1044 (PP1044), mRNA. /PROD=hypothetical protein PP1044 /FL=gb:NM_021730.1
ZAK	6.10084e-09	7.17483e-11	2.04895	1.03489	2.04895	up	2.27747	1.18743	2.27747	up	1.91349	0.936207	1.91349	up	2.45458	1.29548	2.45458	up	2.19218	1.13237	2.19218	up	2.55343	1.35243	2.55343	up	2.92552	1.54869	2.92552	up		51776	Hs.444451	gb:AB030034.1 /DB_XREF=gi:9927292 /GEN=mlklak /FEA=FLmRNA /CNT=66 /TID=Hs.115175.0 /TIER=FL+Stack /STK=10 /UG=Hs.115175 /LL=51776 /DEF=Homo sapiens mlklak mRNA for plaucible mixed-lineage kinase protein, complete cds. /PROD=plaucible mixed-lineage kinase protein /FL=gb:NM_016653.1 gb:AB030034.1 gb:AF251441.1 gb:AF238255.1 gb:AB049733.1
ETS2	6.10463e-09	7.19046e-11	2.45626	1.29646	2.45626	up	2.07696	1.05447	2.07696	up	2.04748	1.03385	2.04748	up	2.72458	1.44604	2.72458	up	2.2568	1.17428	2.2568	up	3.19053	1.6738	3.19053	up	2.9136	1.5428	2.9136	up		2114	Hs.644231	gb:AL575509 /DB_XREF=gi:12936742 /DB_XREF=AL575509 /CLONE=CS0DI059YP21 (3 prime) /FEA=FLmRNA /CNT=357 /TID=Hs.85146.0 /TIER=Stack /STK=9 /UG=Hs.85146 /LL=2114 /UG_GENE=ETS2 /UG_TITLE=v-ets avian erythroblastosis virus E26 oncogene homolog 2 /FL=gb:NM_005239.1 gb:J04102.1
OSGEPL1	6.1341e-09	7.23639e-11	-2.09938	-1.06997	2.09938	down	-2.04851	-1.03458	2.04851	down	-1.91365	-0.936325	1.91365	down	-2.49603	-1.31964	2.49603	down	-1.74989	-0.807265	1.74989	down	-2.65827	-1.41048	2.65827	down	-2.63935	-1.40018	2.63935	down		64172	Hs.60772	gb:AW130077 /DB_XREF=gi:6131682 /DB_XREF=xf27h02.x1 /CLONE=IMAGE:2619315 /FEA=EST /CNT=12 /TID=Hs.24944.0 /TIER=Stack /STK=10 /UG=Hs.24944 /UG_TITLE=ESTs, Weakly similar to ALU1_HUMAN ALU SUBFAMILY J SEQUENCE CONTAMINATION WARNING ENTRY (H.sapiens)
ZDHHC3	6.18425e-09	7.30686e-11	1.5109	0.595411	1.5109	up	1.51822	0.60238	1.51822	up	1.4111	0.496816	1.4111	up	1.57235	0.652923	1.57235	up	1.34607	0.428749	1.34607	up	1.72536	0.786899	1.72536	up	1.68468	0.752471	1.68468	up		51304	Hs.61430	gb:BE542551 /DB_XREF=gi:9771196 /DB_XREF=601063935F1 /CLONE=IMAGE:3450249 /FEA=FLmRNA /CNT=173 /TID=Hs.14896.0 /TIER=Stack /STK=34 /UG=Hs.14896 /LL=51304 /UG_GENE=LOC51304 /UG_TITLE=DHHC1 protein /FL=gb:NM_016598.1 gb:AF247703.1
	6.21952e-09	7.35991e-11	1.56214	0.64352	1.56214	up	1.83418	0.875134	1.83418	up	1.49534	0.580474	1.49534	up	1.92578	0.945445	1.92578	up	1.67977	0.748268	1.67977	up	1.79069	0.840516	1.79069	up	2.13617	1.09503	2.13617	up				gb:AI056293 /DB_XREF=gi:3330159 /DB_XREF=oz02g11.x1 /CLONE=IMAGE:1674212 /FEA=EST /CNT=5 /TID=Hs.20516.0 /TIER=ConsEnd /STK=4 /UG=Hs.20516 /UG_TITLE=ESTs
TP53I3	6.25294e-09	7.41089e-11	2.05209	1.0371	2.05209	up	1.39207	0.477231	1.39207	up	1.73628	0.796002	1.73628	up	2.12614	1.08824	2.12614	up	1.85826	0.893954	1.85826	up	2.43299	1.28273	2.43299	up	2.52985	1.33905	2.52985	up		9540	Hs.50649	gb:BC000474.1 /DB_XREF=gi:12653408 /FEA=FLmRNA /CNT=7 /TID=Hs.50649.1 /TIER=FL /STK=0 /UG=Hs.50649 /LL=9540 /UG_GENE=PIG3 /DEF=Homo sapiens, quinone oxidoreductase homolog, clone MGC:8642, mRNA, complete cds. /PROD=quinone oxidoreductase homolog /FL=gb:BC000474.1
ELP2	6.2564e-09	7.42643e-11	-1.66785	-0.737992	1.66785	down	-1.66008	-0.731254	1.66008	down	-1.4577	-0.543693	1.4577	down	-1.72343	-0.785279	1.72343	down	-1.35389	-0.437114	1.35389	down	-1.91604	-0.938127	1.91604	down	-1.98681	-0.990457	1.98681	down		55250	Hs.8739	gb:NM_018255.1 /DB_XREF=gi:8922734 /GEN=FLJ10879 /FEA=FLmRNA /CNT=126 /TID=Hs.8739.0 /TIER=FL /STK=5 /UG=Hs.8739 /LL=55250 /DEF=Homo sapiens hypothetical protein FLJ10879 (FLJ10879), mRNA. /PROD=hypothetical protein FLJ10879 /FL=gb:NM_018255.1
	6.49469e-09	7.72117e-11	5.58667	2.48199	5.58667	up	6.523	2.70553	6.523	up	6.33965	2.6644	6.33965	up	7.23246	2.85449	7.23246	up	4.70226	2.23335	4.70226	up	5.14205	2.36234	5.14205	up	6.10612	2.61026	6.10612	up			Hs.660361	gb:AU157823 /DB_XREF=gi:11019344 /DB_XREF=AU157823 /CLONE=PLACE1009595 /FEA=mRNA /CNT=6 /TID=Hs.60090.0 /TIER=ConsEnd /STK=1 /UG=Hs.60090 /UG_TITLE=Homo sapiens cDNA FLJ13595 fis, clone PLACE1009595
KIAA1147	6.53213e-09	7.77762e-11	-1.82907	-0.871107	1.82907	down	-1.64761	-0.720376	1.64761	down	-1.67383	-0.743154	1.67383	down	-1.86192	-0.896794	1.86192	down	-1.53725	-0.620354	1.53725	down	-1.93492	-0.952274	1.93492	down	-1.98346	-0.988016	1.98346	down		57189	Hs.521240	gb:AF116707.1 /DB_XREF=gi:7959912 /FEA=FLmRNA /CNT=136 /TID=Hs.12461.0 /TIER=FL+Stack /STK=48 /UG=Hs.12461 /LL=57189 /UG_GENE=LCHN /DEF=Homo sapiens PRO2561 mRNA, complete cds. /PROD=PRO2561 /FL=gb:AF116707.1
DRAM1	6.56594e-09	7.82989e-11	2.49338	1.3181	2.49338	up	2.3234	1.21624	2.3234	up	2.0696	1.04935	2.0696	up	2.53239	1.3405	2.53239	up	2.04346	1.03102	2.04346	up	2.65482	1.40861	2.65482	up	2.42628	1.27875	2.42628	up		55332	Hs.525634	gb:NM_018370.1 /DB_XREF=gi:8922957 /GEN=FLJ11259 /FEA=FLmRNA /CNT=71 /TID=Hs.184465.0 /TIER=FL+Stack /STK=31 /UG=Hs.184465 /LL=55332 /DEF=Homo sapiens hypothetical protein FLJ11259 (FLJ11259), mRNA. /PROD=hypothetical protein FLJ11259 /FL=gb:NM_018370.1
RAB32	6.6862e-09	7.98553e-11	2.06875	1.04876	2.06875	up	1.68432	0.752163	1.68432	up	1.65668	0.728297	1.65668	up	2.19333	1.13312	2.19333	up	1.72979	0.790594	1.72979	up	2.26842	1.18169	2.26842	up	2.25144	1.17085	2.25144	up		10981	Hs.287714	gb:NM_006834.1 /DB_XREF=gi:5803132 /GEN=RAB32 /FEA=FLmRNA /CNT=73 /TID=Hs.32217.0 /TIER=FL /STK=0 /UG=Hs.32217 /LL=10981 /DEF=Homo sapiens RAB32, member RAS oncogene family (RAB32), mRNA. /PROD=RAB32, member RAS oncogene family /FL=gb:NM_006834.1 gb:U71127.1
VEZT	6.80645e-09	8.1416e-11	-1.73984	-0.798954	1.73984	down	-2.90068	-1.53639	2.90068	down	-1.9449	-0.959699	1.9449	down	-2.43215	-1.28223	2.43215	down	-1.69506	-0.761338	1.69506	down	-2.60049	-1.37878	2.60049	down	-3.13857	-1.65011	3.13857	down		55591	Hs.24135	gb:AF225417.1 /DB_XREF=gi:9963836 /FEA=FLmRNA /CNT=149 /TID=Hs.24135.2 /TIER=FL /STK=0 /UG=Hs.24135 /LL=55591 /UG_GENE=DKFZp761C241 /DEF=Homo sapiens 88.8 kDa protein mRNA, complete cds. /PROD=88.8 kDa protein /FL=gb:AF225417.1
SIPA1L2	6.90258e-09	8.26921e-11	2.57044	1.36201	2.57044	up	2.61653	1.38765	2.61653	up	2.22214	1.15195	2.22214	up	3.26544	1.70728	3.26544	up	2.03843	1.02746	2.03843	up	2.98248	1.57651	2.98248	up	3.36718	1.75154	3.36718	up		57568	Hs.745009	gb:AK022852.1 /DB_XREF=gi:10434485 /FEA=mRNA /CNT=3 /TID=Hs.18760.1 /TIER=ConsEnd /STK=0 /UG=Hs.18760 /LL=57568 /UG_GENE=KIAA1389 /UG_TITLE=KIAA1389 protein /DEF=Homo sapiens cDNA FLJ12790 fis, clone NT2RP2001985, weakly similar to Homo sapiens high-risk human papilloma viruses E6 oncoproteins targeted protein E6TP1 alpha mRNA.
SH2D1A	6.93217e-09	8.31734e-11	-4.17767	-2.0627	4.17767	down	-4.29549	-2.10282	4.29549	down	-3.18994	-1.67353	3.18994	down	-5.00603	-2.32367	5.00603	down	-3.0507	-1.60914	3.0507	down	-4.82935	-2.27183	4.82935	down	-5.45451	-2.44745	5.45451	down		4068	Hs.349094	gb:AF072930.1 /DB_XREF=gi:3695068 /FEA=FLmRNA /CNT=29 /TID=Hs.151544.0 /TIER=FL /STK=0 /UG=Hs.151544 /LL=4068 /UG_GENE=SH2D1A /DEF=Homo sapiens clone 14 T cell signal transduction molecule SAP mRNA, complete cds. /PROD=T cell signal transduction molecule SAP /FL=gb:AF072930.1 gb:AF073019.1 gb:AF100541.1 gb:NM_002351.1
SPAG16	6.9662e-09	8.37091e-11	-1.69753	-0.763441	1.69753	down	-1.98337	-0.987954	1.98337	down	-1.61934	-0.695407	1.61934	down	-1.93345	-0.951179	1.93345	down	-1.36494	-0.448834	1.36494	down	-1.84716	-0.885307	1.84716	down	-1.83985	-0.87959	1.83985	down		79582	Hs.743365	gb:NM_024532.1 /DB_XREF=gi:13375683 /GEN=FLJ22724 /FEA=FLmRNA /CNT=66 /TID=Hs.6783.0 /TIER=FL+Stack /STK=44 /UG=Hs.6783 /LL=79582 /DEF=Homo sapiens hypothetical protein FLJ22724 (FLJ22724), mRNA. /PROD=hypothetical protein FLJ22724 /FL=gb:NM_024532.1
HMGN3	6.96848e-09	8.39913e-11	-2.02194	-1.01574	2.02194	down	-2.08965	-1.06326	2.08965	down	-2.03023	-1.02164	2.03023	down	-2.65742	-1.41003	2.65742	down	-1.78491	-0.835854	1.78491	down	-2.88134	-1.52674	2.88134	down	-3.35805	-1.74762	3.35805	down		9324	Hs.77558	gb:AF274949.1 /DB_XREF=gi:12751062 /FEA=FLmRNA /CNT=139 /TID=Hs.77558.0 /TIER=FL+Stack /STK=57 /UG=Hs.77558 /LL=9324 /UG_GENE=TRIP7 /DEF=Homo sapiens PNAS-24 mRNA, complete cds. /PROD=PNAS-24 /FL=gb:AF274949.1
CAMKK2	6.96848e-09	8.39765e-11	1.67861	0.747271	1.67861	up	1.95402	0.966446	1.95402	up	1.88184	0.912146	1.88184	up	2.17672	1.12216	2.17672	up	1.90342	0.928596	1.90342	up	1.98884	0.991928	1.98884	up	2.50829	1.32671	2.50829	up		10645	Hs.297343	gb:AA181179 /DB_XREF=gi:1764664 /DB_XREF=zp57b04.s1 /CLONE=IMAGE:624271 /FEA=mRNA /CNT=190 /TID=Hs.108708.3 /TIER=Stack /STK=16 /UG=Hs.108708 /LL=10645 /UG_GENE=CAMKK2 /UG_TITLE=calciumcalmodulin-dependent protein kinase kinase 2, beta
CSRP2BP	7.01306e-09	8.4657e-11	-1.5744	-0.654804	1.5744	down	-1.63434	-0.708711	1.63434	down	-1.41133	-0.497054	1.41133	down	-1.65522	-0.727026	1.65522	down	-1.3117	-0.391436	1.3117	down	-1.72763	-0.78879	1.72763	down	-1.68547	-0.753154	1.68547	down		57325	Hs.728790	gb:AF252257.1 /DB_XREF=gi:9966412 /FEA=mRNA /CNT=97 /TID=Hs.301532.1 /TIER=Stack /STK=44 /UG=Hs.301532 /LL=57325 /UG_GENE=CRP2BP /DEF=Homo sapiens CRP2 binding protein mRNA, partial cds. /PROD=CRP2 binding protein
AKAP7	7.03473e-09	8.50472e-11	-1.85752	-0.893377	1.85752	down	-2.31426	-1.21055	2.31426	down	-1.73314	-0.793392	1.73314	down	-2.31757	-1.21261	2.31757	down	-1.772	-0.825378	1.772	down	-2.53449	-1.3417	2.53449	down	-3.08532	-1.62542	3.08532	down		9465	Hs.486483	gb:AL137063 /DB_XREF=gi:9581554 /FEA=FLmRNA /CNT=48 /TID=Hs.12835.0 /TIER=Stack /STK=22 /UG=Hs.12835 /LL=9465 /UG_GENE=AKAP7 /UG_TITLE=A kinase (PRKA) anchor protein 7 /DEF=Human DNA sequence from clone RP1-104L14 on chromosome 6 Contains part of the AKAP7 (A kinase (PRKA) anchor protein 7) gene, ESTs, STSs and GSSs /FL=gb:AF047715.1 gb:NM_004842.1
LTF	7.30087e-09	8.83982e-11	8.95043	3.16196	8.95043	up	12.9564	3.6956	12.9564	up	7.12425	2.83274	7.12425	up	8.4326	3.07598	8.4326	up	11.0734	3.46903	11.0734	up	16.6679	4.059	16.6679	up	12.9216	3.69171	12.9216	up		4057	Hs.529517	gb:NM_002343.1 /DB_XREF=gi:4505042 /GEN=LTF /FEA=FLmRNA /CNT=392 /TID=Hs.105938.0 /TIER=FL+Stack /STK=136 /UG=Hs.105938 /LL=4057 /DEF=Homo sapiens lactotransferrin (LTF), mRNA. /PROD=lactotransferrin /FL=gb:AF332168.1 gb:M93150.1 gb:NM_002343.1 gb:M83202.1
RAB22A	7.32245e-09	8.87935e-11	-1.43316	-0.519198	1.43316	down	-1.59195	-0.670791	1.59195	down	-1.25452	-0.327137	1.25452	down	-1.51617	-0.600427	1.51617	down	-1.29694	-0.375116	1.29694	down	-1.70119	-0.766547	1.70119	down	-1.63412	-0.708511	1.63412	down		57403	Hs.529044	gb:N95443 /DB_XREF=gi:1267753 /DB_XREF=zb81c12.s1 /CLONE=IMAGE:310006 /FEA=EST /CNT=49 /TID=Hs.19180.0 /TIER=Stack /STK=38 /UG=Hs.19180 /UG_TITLE=Homo sapiens mRNA; cDNA DKFZp564E122 (from clone DKFZp564E122)
TOM1	7.33746e-09	8.91098e-11	1.22665	0.294719	1.22665	up	1.32087	0.40149	1.32087	up	1.25677	0.329725	1.25677	up	1.6553	0.727094	1.6553	up	1.40326	0.48878	1.40326	up	1.6337	0.708141	1.6337	up	1.84186	0.88116	1.84186	up		10043	Hs.474705	gb:NM_005488.1 /DB_XREF=gi:4885636 /GEN=TOM1 /FEA=FLmRNA /CNT=129 /TID=Hs.9482.0 /TIER=FL+Stack /STK=63 /UG=Hs.9482 /LL=10043 /DEF=Homo sapiens target of myb1 (chicken) homolog (TOM1), mRNA. /PROD=target of myb1 (chicken) homolog /FL=gb:NM_005488.1
ZNF682	7.38729e-09	8.98499e-11	-1.35032	-0.433299	1.35032	down	-1.47292	-0.558675	1.47292	down	-1.31395	-0.393916	1.31395	down	-1.53686	-0.619988	1.53686	down	-1.28364	-0.360238	1.28364	down	-1.5111	-0.595595	1.5111	down	-1.52706	-0.610758	1.52706	down		91120	Hs.306298	gb:AA603590 /DB_XREF=gi:2437451 /DB_XREF=np27b02.s1 /CLONE=IMAGE:1117515 /FEA=EST /CNT=3 /TID=Hs.162657.0 /TIER=ConsEnd /STK=3 /UG=Hs.162657 /UG_TITLE=ESTs
C6orf89	7.39358e-09	9.00617e-11	1.60929	0.686424	1.60929	up	1.48721	0.572604	1.48721	up	1.65756	0.729063	1.65756	up	1.71221	0.775858	1.71221	up	1.63964	0.713376	1.63964	up	1.64554	0.718559	1.64554	up	1.79656	0.845236	1.79656	up		221477	Hs.433381	gb:AA004279 /DB_XREF=gi:1448426 /DB_XREF=zh97g02.s1 /CLONE=IMAGE:429266 /FEA=mRNA /CNT=145 /TID=Hs.167578.0 /TIER=Stack /STK=21 /UG=Hs.167578 /UG_TITLE=Homo sapiens cDNA FLJ11095 fis, clone PLACE1005374
MRVI1	7.47762e-09	9.12221e-11	4.80405	2.26425	4.80405	up	2.79945	1.48514	2.79945	up	2.46517	1.30169	2.46517	up	3.85699	1.94747	3.85699	up	2.04145	1.0296	2.04145	up	3.72333	1.89659	3.72333	up	3.35979	1.74837	3.35979	up		10335	Hs.501898	gb:AL044056 /DB_XREF=gi:5432284 /DB_XREF=DKFZp434K0528_s1 /CLONE=DKFZp434K0528 /FEA=EST /CNT=11 /TID=Hs.158047.0 /TIER=Stack /STK=9 /UG=Hs.158047 /UG_TITLE=ESTs
MAGEE1	7.59622e-09	9.28079e-11	-1.24715	-0.318631	1.24715	down	-1.42767	-0.51366	1.42767	down	-1.30422	-0.383192	1.30422	down	-1.37964	-0.464291	1.37964	down	-1.26089	-0.33444	1.26089	down	-1.45227	-0.538311	1.45227	down	-1.47129	-0.557082	1.47129	down		57692	Hs.8453	gb:AI298393 /DB_XREF=gi:3958129 /DB_XREF=qm93d04.x1 /CLONE=IMAGE:1896295 /TID=Hs2.407360.1 /CNT=9 /FEA=mRNA /TIER=Stack /STK=8 /UG=Hs.407360 /UG_TITLE=Homo sapiens full length insert cDNA clone YW32H04
CAMK2D	7.69061e-09	9.41019e-11	-1.98146	-0.986561	1.98146	down	-1.89372	-0.921222	1.89372	down	-1.82949	-0.871441	1.82949	down	-2.13243	-1.0925	2.13243	down	-1.76818	-0.822263	1.76818	down	-2.56808	-1.36069	2.56808	down	-2.73949	-1.45391	2.73949	down		817	Hs.144114	gb:BF797381 /DB_XREF=gi:12102435 /DB_XREF=602257023F1 /CLONE=IMAGE:4340525 /FEA=mRNA /CNT=134 /TID=Hs.111460.0 /TIER=Stack /STK=31 /UG=Hs.111460 /UG_TITLE=Homo sapiens cDNA: FLJ21715 fis, clone COL10287, highly similar to AF071569 Homo sapiens multifunctional calciumcalmodulin-dependent protein kinase II delta2 isoform mRNA
PURA	7.93427e-09	9.72283e-11	-1.49827	-0.583298	1.49827	down	-1.63126	-0.705983	1.63126	down	-1.3713	-0.455541	1.3713	down	-1.71545	-0.77859	1.71545	down	-1.37211	-0.456399	1.37211	down	-1.69713	-0.763093	1.69713	down	-1.84947	-0.887114	1.84947	down		5813	Hs.443121	gb:AI129941 /DB_XREF=gi:3598455 /DB_XREF=qc45f08.x1 /CLONE=IMAGE:1712583 /FEA=EST /CNT=14 /TID=Hs.115850.0 /TIER=Stack /STK=9 /UG=Hs.115850 /UG_TITLE=ESTs
ZNF439	7.94726e-09	9.75329e-11	-1.64553	-0.718556	1.64553	down	-2.14389	-1.10023	2.14389	down	-1.67953	-0.748055	1.67953	down	-2.09514	-1.06704	2.09514	down	-1.59728	-0.675621	1.59728	down	-2.10274	-1.07227	2.10274	down	-2.22503	-1.15382	2.22503	down		90594	Hs.528731	gb:N29327 /DB_XREF=gi:1147847 /DB_XREF=yw84d09.s1 /CLONE=IMAGE:258929 /FEA=EST /CNT=7 /TID=Hs.189882.0 /TIER=ConsEnd /STK=5 /UG=Hs.189882 /UG_TITLE=ESTs, Weakly similar to T12489 hypothetical protein DKFZp572P0920.1 (H.sapiens)
SAMSN1	8.0643e-09	9.91167e-11	3.43127	1.77874	3.43127	up	1.81519	0.860119	1.81519	up	2.01754	1.01259	2.01754	up	3.27369	1.71092	3.27369	up	2.52809	1.33805	2.52809	up	4.50685	2.17212	4.50685	up	2.86462	1.51834	2.86462	up		64092	Hs.473341	gb:AF519621.1 /DB_XREF=gi:21693567 /GEN=SAMSN1 /TID=Hs2.24633.3 /CNT=1 /FEA=FLmRNA /TIER=FL /STK=1 /LL=64092 /UG=Hs.24633 /DEF=Homo sapiens SAMSN1 variant b (SAMSN1) mRNA, complete cds; alternatively spliced. /PROD=SAMSN1 variant b /FL=gb:AF519621.1
DNAJC10	8.12658e-09	1.00031e-10	-1.77723	-0.829631	1.77723	down	-2.42175	-1.27605	2.42175	down	-1.63298	-0.707503	1.63298	down	-2.09563	-1.06738	2.09563	down	-1.62057	-0.6965	1.62057	down	-2.59873	-1.37781	2.59873	down	-2.7324	-1.45017	2.7324	down		54431	Hs.516632	gb:AW512173 /DB_XREF=gi:7150251 /DB_XREF=xx71a09.x1 /CLONE=IMAGE:2849080 /FEA=mRNA /CNT=129 /TID=Hs.1098.0 /TIER=Stack /STK=34 /UG=Hs.1098 /LL=54431 /UG_GENE=DKFZP434J1813 /UG_TITLE=DKFZp434J1813 protein
	8.22583e-09	1.01403e-10	3.38576	1.75948	3.38576	up	3.12901	1.64571	3.12901	up	2.62533	1.3925	2.62533	up	3.34966	1.74401	3.34966	up	2.44984	1.29269	2.44984	up	3.23828	1.69523	3.23828	up	3.08619	1.62583	3.08619	up			Hs.664781	gb:AA702409 /DB_XREF=gi:2705522 /DB_XREF=zi85a09.s1 /CLONE=IMAGE:447544 /FEA=EST /CNT=5 /TID=Hs.192075.0 /TIER=ConsEnd /STK=4 /UG=Hs.192075 /UG_TITLE=ESTs
SHKBP1	8.33429e-09	1.02893e-10	1.53738	0.620471	1.53738	up	1.56802	0.648945	1.56802	up	1.49115	0.576423	1.49115	up	2.07757	1.05489	2.07757	up	1.84352	0.88246	1.84352	up	1.97311	0.980472	1.97311	up	2.5096	1.32745	2.5096	up		92799	Hs.26506	gb:AI348000 /DB_XREF=gi:4085206 /DB_XREF=qp61a11.x1 /CLONE=IMAGE:1927484 /FEA=mRNA /CNT=146 /TID=Hs.26506.0 /TIER=Stack /STK=63 /UG=Hs.26506 /UG_TITLE=Homo sapiens clone CDABP0005 mRNA sequence
GAS7	8.34948e-09	1.03233e-10	2.0061	1.0044	2.0061	up	1.66316	0.733925	1.66316	up	1.73344	0.79364	1.73344	up	2.43034	1.28116	2.43034	up	1.761	0.816392	1.761	up	2.13249	1.09254	2.13249	up	2.45183	1.29386	2.45183	up		8522	Hs.462214	gb:NM_005890.1 /DB_XREF=gi:5360211 /GEN=GAS7 /FEA=FLmRNA /CNT=244 /TID=Hs.226133.0 /TIER=FL+Stack /STK=19 /UG=Hs.226133 /LL=8522 /DEF=Homo sapiens growth arrest-specific 7 (GAS7), transcript variant b, mRNA. /PROD=growth arrest-specific 7 isoform b /FL=gb:AB007854.1 gb:NM_005890.1
TSPAN13	8.36077e-09	1.03525e-10	-2.40024	-1.26318	2.40024	down	-3.13177	-1.64698	3.13177	down	-2.49197	-1.31729	2.49197	down	-2.52417	-1.33581	2.52417	down	-2.00118	-1.00085	2.00118	down	-3.37744	-1.75593	3.37744	down	-3.55976	-1.83178	3.55976	down		27075	Hs.364544	gb:NM_014399.1 /DB_XREF=gi:7657372 /GEN=NET-6 /FEA=FLmRNA /CNT=217 /TID=Hs.284243.0 /TIER=FL+Stack /STK=10 /UG=Hs.284243 /LL=27075 /DEF=Homo sapiens tetraspan NET-6 protein (NET-6), mRNA. /PROD=tetraspan NET-6 protein /FL=gb:AF120265.1 gb:NM_014399.1 gb:AF100759.1
ACVR1B	8.38392e-09	1.04035e-10	1.43622	0.522275	1.43622	up	1.59007	0.669089	1.59007	up	1.41789	0.503749	1.41789	up	1.87873	0.909757	1.87873	up	1.57145	0.652098	1.57145	up	1.93273	0.950643	1.93273	up	2.26495	1.17948	2.26495	up		91	Hs.438918	gb:BC000254.1 /DB_XREF=gi:12652986 /FEA=FLmRNA /CNT=53 /TID=Hs.99954.0 /TIER=FL /STK=0 /UG=Hs.99954 /LL=91 /UG_GENE=ACVR1B /DEF=Homo sapiens, activin A receptor, type IB, clone MGC:2177, mRNA, complete cds. /PROD=activin A receptor, type IB /FL=gb:Z22536.1 gb:U14722.1 gb:NM_004302.2 gb:BC000254.1
RENBP	8.38392e-09	1.04119e-10	1.17251	0.229601	1.17251	up	1.19551	0.257625	1.19551	up	1.30808	0.387454	1.30808	up	1.47136	0.557154	1.47136	up	1.27758	0.353416	1.27758	up	1.47312	0.558879	1.47312	up	1.74582	0.803902	1.74582	up		5973	Hs.158331	gb:NM_002910.4 /DB_XREF=gi:11496987 /GEN=RENBP /FEA=FLmRNA /CNT=10 /TID=Hs.158331.0 /TIER=FL /STK=1 /UG=Hs.158331 /LL=5973 /DEF=Homo sapiens renin-binding protein (RENBP), mRNA. /PROD=renin-binding protein /FL=gb:NM_002910.4 gb:D10232.1
ATXN10	8.52767e-09	1.06271e-10	-1.62315	-0.698795	1.62315	down	-1.82273	-0.866101	1.82273	down	-1.49547	-0.580595	1.49547	down	-1.75866	-0.814478	1.75866	down	-1.36882	-0.452937	1.36882	down	-1.85608	-0.89226	1.85608	down	-2.0018	-1.0013	2.0018	down		25814	Hs.475125	gb:AF119662.1 /DB_XREF=gi:6563249 /FEA=FLmRNA /CNT=227 /TID=Hs.13493.0 /TIER=FL+Stack /STK=56 /UG=Hs.13493 /LL=25814 /UG_GENE=E46L /DEF=Homo sapiens E46 protein mRNA, complete cds. /PROD=E46 protein /FL=gb:AL050282.1 gb:NM_013236.1 gb:AF119662.1
CD6	8.52767e-09	1.06372e-10	-2.10091	-1.07102	2.10091	down	-1.7375	-0.797014	1.7375	down	-1.82967	-0.871583	1.82967	down	-2.12501	-1.08747	2.12501	down	-1.60161	-0.679526	1.60161	down	-2.19496	-1.13419	2.19496	down	-2.15519	-1.10782	2.15519	down		923	Hs.744366	gb:AW134823 /DB_XREF=gi:6138369 /DB_XREF=UI-H-BI1-abs-c-11-0-UI.s1 /CLONE=IMAGE:2712956 /FEA=mRNA /CNT=27 /TID=Hs.81226.0 /TIER=Stack /STK=19 /UG=Hs.81226 /LL=923 /UG_GENE=CD6 /UG_TITLE=CD6 antigen
LINC01355	8.52767e-09	1.06062e-10	-1.34673	-0.429461	1.34673	down	-1.44015	-0.526221	1.44015	down	-1.33213	-0.413738	1.33213	down	-1.5916	-0.67048	1.5916	down	-1.36186	-0.445576	1.36186	down	-1.68078	-0.749128	1.68078	down	-1.73897	-0.798231	1.73897	down		100996511	Hs.99836	gb:AI384076 /DB_XREF=gi:4196857 /DB_XREF=te36c06.x1 /CLONE=IMAGE:2088778 /FEA=EST /CNT=30 /TID=Hs.99836.0 /TIER=Stack /STK=23 /UG=Hs.99836 /UG_TITLE=ESTs
HLA-DPA1	8.6749e-09	1.08367e-10	-1.83647	-0.876933	1.83647	down	-2.36796	-1.24365	2.36796	down	-1.71457	-0.777844	1.71457	down	-1.73355	-0.793729	1.73355	down	-1.89959	-0.925684	1.89959	down	-2.80539	-1.4882	2.80539	down	-2.84425	-1.50805	2.84425	down		3113		gb:AI128225 /DB_XREF=gi:3596739 /DB_XREF=qc33e05.x1 /CLONE=IMAGE:1711424 /FEA=EST /CNT=30 /TID=Hs.914.1 /TIER=Stack /STK=16 /UG=Hs.914 /UG_TITLE=Human mRNA for SB classII histocompatibility antigen alpha-chain
CNIH4	8.75026e-09	1.09468e-10	2.71868	1.44291	2.71868	up	2.11181	1.07848	2.11181	up	1.74652	0.804483	1.74652	up	2.36868	1.24408	2.36868	up	2.19317	1.13302	2.19317	up	3.16828	1.6637	3.16828	up	2.44535	1.29004	2.44535	up		29097	Hs.445890	gb:NM_014184.1 /DB_XREF=gi:7661823 /GEN=HSPC163 /FEA=FLmRNA /CNT=76 /TID=Hs.108854.0 /TIER=FL+Stack /STK=39 /UG=Hs.108854 /LL=29097 /DEF=Homo sapiens HSPC163 protein (HSPC163), mRNA. /PROD=HSPC163 protein /FL=gb:BC000573.1 gb:NM_014184.1 gb:AF161512.1
GCSAM	8.78345e-09	1.10044e-10	-1.63821	-0.712122	1.63821	down	-1.74357	-0.802045	1.74357	down	-1.48267	-0.568201	1.48267	down	-1.85597	-0.892173	1.85597	down	-1.43975	-0.525823	1.43975	down	-1.80329	-0.850633	1.80329	down	-1.73532	-0.795203	1.73532	down		257144	Hs.49614	gb:W94993 /DB_XREF=gi:1424113 /DB_XREF=zh46b04.r1 /CLONE=IMAGE:415087 /FEA=EST /CNT=19 /TID=Hs.49614.0 /TIER=ConsEnd /STK=0 /UG=Hs.49614 /UG_TITLE=ESTs, Weakly similar to M17 protein (M.musculus)
MACROD2	8.92524e-09	1.11984e-10	-1.56955	-0.650354	1.56955	down	-1.69569	-0.76187	1.69569	down	-1.48963	-0.574956	1.48963	down	-1.80321	-0.850565	1.80321	down	-1.53757	-0.620654	1.53757	down	-2.31088	-1.20844	2.31088	down	-2.00085	-1.00061	2.00085	down		140733	Hs.661576	gb:BC035876.1 /DB_XREF=gi:23273099 /TID=Hs2.399982.1 /CNT=2 /FEA=mRNA /TIER=ConsEnd /STK=0 /UG=Hs.399982 /UG_TITLE=Homo sapiens, clone IMAGE:4717477, mRNA /DEF=Homo sapiens, clone IMAGE:4513167, mRNA.
RPL15	9.19975e-09	1.15596e-10	-1.91392	-0.936529	1.91392	down	-1.56162	-0.643044	1.56162	down	-1.53769	-0.620763	1.53769	down	-1.87519	-0.907038	1.87519	down	-1.53096	-0.614433	1.53096	down	-2.1979	-1.13613	2.1979	down	-2.05393	-1.03839	2.05393	down		6138	Hs.381219	gb:AF279903.1 /DB_XREF=gi:12006349 /GEN=EC45 /FEA=FLmRNA /CNT=466 /TID=Hs.74267.0 /TIER=FL+Stack /STK=237 /UG=Hs.74267 /LL=6138 /DEF=Homo sapiens 60S ribosomal protein L15 (EC45) mRNA, complete cds. /PROD=60S ribosomal protein L15 /FL=gb:L25899.1 gb:AF279903.1 gb:NM_002948.1
PPP1R3D	9.29323e-09	1.16941e-10	2.52876	1.33843	2.52876	up	3.49635	1.80585	3.49635	up	2.62838	1.39417	2.62838	up	3.04655	1.60718	3.04655	up	1.85237	0.88937	1.85237	up	2.75804	1.46364	2.75804	up	2.96829	1.56963	2.96829	up		5509	Hs.42215	gb:NM_006242.2 /DB_XREF=gi:6806895 /GEN=PPP1R6 /FEA=FLmRNA /CNT=67 /TID=Hs.42215.0 /TIER=FL+Stack /STK=9 /UG=Hs.42215 /LL=5509 /DEF=Homo sapiens protein phosphatase 1, regulatory subunit 6 (PPP1R6), mRNA. /PROD=protein phosphatase 1, regulatory subunit 6 /FL=gb:NM_006242.2
DEDD	9.30733e-09	1.17289e-10	1.36269	0.446455	1.36269	up	1.21991	0.286776	1.21991	up	1.34857	0.431429	1.34857	up	1.46745	0.553315	1.46745	up	1.35752	0.440971	1.35752	up	1.43297	0.519012	1.43297	up	1.61025	0.687281	1.61025	up		9191	Hs.744092	gb:AK022531.1 /DB_XREF=gi:10433972 /FEA=mRNA /CNT=10 /TID=Hs.169681.2 /TIER=ConsEnd /STK=0 /UG=Hs.169681 /LL=9191 /UG_GENE=DEDD /UG_TITLE=death effector domain-containing /DEF=Homo sapiens cDNA FLJ12469 fis, clone NT2RM1000874, highly similar to Homo sapiens death effector domain-containing testicular molecule mRNA.
MTMR3	9.36476e-09	1.18869e-10	1.8169	0.861478	1.8169	up	1.54966	0.631956	1.54966	up	1.61395	0.6906	1.61395	up	2.04512	1.03218	2.04512	up	1.69096	0.75784	1.69096	up	1.8753	0.907118	1.8753	up	2.08269	1.05845	2.08269	up		8897	Hs.474536	gb:NM_021090.1 /DB_XREF=gi:10835108 /GEN=MTMR3 /FEA=FLmRNA /CNT=169 /TID=Hs.63302.0 /TIER=FL+Stack /STK=76 /UG=Hs.63302 /LL=8897 /DEF=Homo sapiens myotubularin related protein 3 (MTMR3), mRNA. /PROD=myotubularin related protein 3 /FL=gb:AB002369.1 gb:AF233438.1 gb:NM_021090.1
FES	9.36476e-09	1.18762e-10	1.79122	0.840943	1.79122	up	1.6786	0.747262	1.6786	up	1.62516	0.700586	1.62516	up	2.29455	1.19821	2.29455	up	1.71657	0.779532	1.71657	up	2.30358	1.20388	2.30358	up	2.43749	1.28539	2.43749	up		2242	Hs.7636	gb:NM_002005.2 /DB_XREF=gi:13376997 /GEN=FES /FEA=FLmRNA /CNT=34 /TID=Hs.7636.0 /TIER=FL+Stack /STK=16 /UG=Hs.7636 /LL=2242 /DEF=Homo sapiens feline sarcoma (Snyder-Theilen) viral (v-fes)Fujinami avian sarcoma (PRCII) viral (v-fps) oncogene homolog (FES), mRNA. /PROD=V-FES feline sarcoma viralV-FPS fujinami aviansarcoma viral oncogene homolog /FL=gb:NM_002005.2
KIAA0125	9.36476e-09	1.18637e-10	-1.44833	-0.534387	1.44833	down	-1.53527	-0.618493	1.53527	down	-1.60271	-0.680513	1.60271	down	-1.68467	-0.752462	1.68467	down	-1.16856	-0.224731	1.16856	down	-2.11322	-1.07944	2.11322	down	-2.05742	-1.04084	2.05742	down		9834	Hs.649259	gb:NM_014792.1 /DB_XREF=gi:7661923 /GEN=KIAA0125 /FEA=FLmRNA /CNT=17 /TID=Hs.38365.0 /TIER=FL /STK=5 /UG=Hs.38365 /LL=9834 /DEF=Homo sapiens KIAA0125 gene product (KIAA0125), mRNA. /PROD=KIAA0125 gene product /FL=gb:D50915.1 gb:NM_014792.1
ZNF430	9.36476e-09	1.18351e-10	-1.76967	-0.823476	1.76967	down	-1.65216	-0.724357	1.65216	down	-1.6311	-0.705849	1.6311	down	-1.73998	-0.799073	1.73998	down	-1.66327	-0.73402	1.66327	down	-1.92393	-0.94406	1.92393	down	-2.10567	-1.07428	2.10567	down		80264	Hs.729202	gb:NM_025189.1 /DB_XREF=gi:13430887 /GEN=FLJ13659 /FEA=FLmRNA /CNT=8 /TID=Hs.301651.0 /TIER=FL /STK=0 /UG=Hs.301651 /LL=80264 /DEF=Homo sapiens hypothetical protein FLJ13659 (FLJ13659), mRNA. /PROD=hypothetical protein FLJ13659 /FL=gb:NM_025189.1
DHRS13	9.36476e-09	1.1883e-10	2.24062	1.1639	2.24062	up	1.8843	0.914028	1.8843	up	1.66731	0.737518	1.66731	up	2.10926	1.07674	2.10926	up	1.81643	0.861106	1.81643	up	2.18266	1.12609	2.18266	up	2.45079	1.29325	2.45079	up		147015	Hs.631760	gb:AI076793 /DB_XREF=gi:3405971 /DB_XREF=oz31g11.x1 /CLONE=IMAGE:1676996 /FEA=EST /CNT=90 /TID=Hs.5163.0 /TIER=Stack /STK=36 /UG=Hs.5163 /UG_TITLE=ESTs, Weakly similar to AF151840 1 CGI-82 protein (H.sapiens)
TMED10	9.39369e-09	1.19408e-10	-1.73205	-0.792478	1.73205	down	-1.832	-0.873423	1.832	down	-1.56687	-0.647882	1.56687	down	-1.77729	-0.829677	1.77729	down	-1.45053	-0.536578	1.45053	down	-1.93893	-0.955258	1.93893	down	-1.97975	-0.985315	1.97975	down		10972	Hs.74137	gb:BE780075 /DB_XREF=gi:10201273 /DB_XREF=601469954F1 /CLONE=IMAGE:3873157 /FEA=mRNA /CNT=137 /TID=Hs.74137.2 /TIER=Stack /STK=73 /UG=Hs.74137 /LL=10972 /UG_GENE=TMP21 /UG_TITLE=transmembrane trafficking protein
SESN3	9.54657e-09	1.21526e-10	-1.77676	-0.82925	1.77676	down	-2.068	-1.04824	2.068	down	-1.0914	-0.126183	1.0914	down	-1.85174	-0.888881	1.85174	down	-1.37803	-0.462609	1.37803	down	-2.23621	-1.16106	2.23621	down	-2.22326	-1.15268	2.22326	down		143686	Hs.120633	gb:BE883841 /DB_XREF=gi:10332617 /DB_XREF=601510245F1 /CLONE=IMAGE:3911890 /FEA=EST /CNT=118 /TID=Hs.159441.0 /TIER=Stack /STK=73 /UG=Hs.159441 /UG_TITLE=ESTs
RELT	9.55762e-09	1.21841e-10	1.33192	0.413509	1.33192	up	1.18731	0.247694	1.18731	up	1.24858	0.320286	1.24858	up	1.35348	0.436677	1.35348	up	1.26333	0.337231	1.26333	up	1.41893	0.5048	1.41893	up	1.50914	0.593725	1.50914	up		84957	Hs.533720	gb:AW571669 /DB_XREF=gi:7236400 /DB_XREF=xx36a02.x1 /CLONE=IMAGE:2839562 /FEA=mRNA /CNT=37 /TID=Hs.79707.0 /TIER=Stack /STK=16 /UG=Hs.79707 /UG_TITLE=Homo sapiens, clone IMAGE:2959521, mRNA, partial cds
LOC100505501	9.58451e-09	1.22359e-10	-1.85731	-0.893217	1.85731	down	-1.73461	-0.794609	1.73461	down	-1.72656	-0.787898	1.72656	down	-2.03108	-1.02225	2.03108	down	-1.5857	-0.665117	1.5857	down	-1.84637	-0.884689	1.84637	down	-2.02208	-1.01584	2.02208	down		100505501	Hs.586401	gb:AI354636 /DB_XREF=gi:4094789 /DB_XREF=qu95c03.x1 /CLONE=IMAGE:1979812 /FEA=EST /CNT=17 /TID=Hs.97275.0 /TIER=ConsEnd /STK=1 /UG=Hs.97275 /UG_TITLE=ESTs
S100A11	9.61293e-09	1.22954e-10	1.82498	0.867882	1.82498	up	2.11516	1.08077	2.11516	up	1.75983	0.815439	1.75983	up	2.37448	1.24761	2.37448	up	1.92798	0.947088	1.92798	up	2.29218	1.19672	2.29218	up	2.5099	1.32763	2.5099	up		6282	Hs.417004	gb:NM_005620.1 /DB_XREF=gi:5032056 /GEN=S100A11 /FEA=FLmRNA /CNT=432 /TID=Hs.256290.0 /TIER=FL+Stack /STK=159 /UG=Hs.256290 /LL=6282 /DEF=Homo sapiens S100 calcium-binding protein A11 (calgizzarin) (S100A11), mRNA. /PROD=S100 calcium-binding protein A11 /FL=gb:D38583.1 gb:NM_005620.1 gb:BC001410.1 gb:D49355.1 gb:D50374.1
PLXDC1	9.61293e-09	1.23074e-10	-1.77591	-0.828561	1.77591	down	-1.78132	-0.832949	1.78132	down	-1.77467	-0.827552	1.77467	down	-2.03336	-1.02387	2.03336	down	-1.67484	-0.74402	1.67484	down	-2.19293	-1.13286	2.19293	down	-2.00703	-1.00506	2.00703	down		57125	Hs.125036	gb:NM_020405.1 /DB_XREF=gi:9966886 /GEN=TEM7 /FEA=FLmRNA /CNT=19 /TID=Hs.125036.0 /TIER=FL /STK=4 /UG=Hs.125036 /LL=57125 /DEF=Homo sapiens tumor endothelial marker 7 precursor (TEM7), mRNA. /PROD=tumor endothelial marker 7 precursor /FL=gb:NM_020405.1 gb:AF279144.1
HLA-DPA1	9.64182e-09	1.23648e-10	-2.07991	-1.05652	2.07991	down	-2.17976	-1.12417	2.17976	down	-1.87688	-0.908337	1.87688	down	-1.75395	-0.810608	1.75395	down	-1.60971	-0.686798	1.60971	down	-2.82852	-1.50005	2.82852	down	-2.88643	-1.52929	2.88643	down		3113	Hs.347270	gb:M27487.1 /DB_XREF=gi:703088 /GEN=HLA-DPA1 /FEA=FLmRNA /CNT=358 /TID=Hs.914.0 /TIER=FL+Stack /STK=139 /UG=Hs.914 /DEF=Homo sapiens MHC class II DPw3-alpha-1 chain mRNA, complete cds. /PROD=MHC class II DP3-alpha /FL=gb:M27487.1
CBX7	9.64182e-09	1.23796e-10	-1.45793	-0.543919	1.45793	down	-1.58272	-0.662408	1.58272	down	-1.38742	-0.472405	1.38742	down	-1.45344	-0.539475	1.45344	down	-1.33929	-0.421472	1.33929	down	-1.86855	-0.90192	1.86855	down	-1.64367	-0.71692	1.64367	down		23492	Hs.356416	gb:AV648364 /DB_XREF=gi:9869378 /DB_XREF=AV648364 /CLONE=GLCBIF04 /FEA=EST /CNT=78 /TID=Hs.152151.1 /TIER=Stack /STK=34 /UG=Hs.152151 /LL=8502 /UG_GENE=PKP4 /UG_TITLE=plakophilin 4
NCR3	9.73992e-09	1.25234e-10	-1.69199	-0.758717	1.69199	down	-1.42694	-0.512924	1.42694	down	-1.48056	-0.566141	1.48056	down	-1.69354	-0.760041	1.69354	down	-1.50744	-0.592097	1.50744	down	-1.67795	-0.746703	1.67795	down	-1.64947	-0.722002	1.64947	down		259197	Hs.509513	gb:AF031137.1 /DB_XREF=gi:2623874 /FEA=FLmRNA /CNT=6 /TID=Hs.88411.3 /TIER=FL /STK=0 /UG=Hs.88411 /LL=7940 /UG_GENE=LY117 /DEF=Homo sapiens 1C7 precursor, mRNA, alternatively spliced, complete cds. /PROD=1C7 precursor /FL=gb:AF031137.1
DACH1	9.79652e-09	1.26141e-10	2.16388	1.11362	2.16388	up	2.98147	1.57602	2.98147	up	2.03412	1.0244	2.03412	up	2.85202	1.51198	2.85202	up	1.87089	0.903725	1.87089	up	3.62934	1.85971	3.62934	up	3.60032	1.84812	3.60032	up		1602	Hs.129452	gb:NM_004392.1 /DB_XREF=gi:4758113 /GEN=DACH /FEA=FLmRNA /CNT=52 /TID=Hs.63931.0 /TIER=FL+Stack /STK=9 /UG=Hs.63931 /LL=1602 /DEF=Homo sapiens dachshund (Drosophila) homolog (DACH), mRNA. /PROD=dachshund (Drosophila) homolog /FL=gb:AF102546.1 gb:NM_004392.1
SIRPA	9.88453e-09	1.27455e-10	1.32644	0.407556	1.32644	up	1.38954	0.474612	1.38954	up	1.43722	0.523278	1.43722	up	1.86357	0.898073	1.86357	up	1.51291	0.597328	1.51291	up	1.81428	0.8594	1.81428	up	2.25647	1.17407	2.25647	up		140885	Hs.581021	gb:D86043.1 /DB_XREF=gi:1864010 /FEA=FLmRNA /CNT=141 /TID=Hs.156114.0 /TIER=FL /STK=0 /UG=Hs.156114 /LL=8194 /UG_GENE=PTPNS1 /DEF=Homo sapiens mRNA for SHPS-1, complete cds. /PROD=SHPS-1 /FL=gb:AB023430.1 gb:NM_004648.1 gb:D86043.1
HK2	9.98926e-09	1.28988e-10	1.90533	0.930044	1.90533	up	1.73281	0.793114	1.73281	up	1.68964	0.75672	1.68964	up	2.03327	1.0238	2.03327	up	1.67489	0.744066	1.67489	up	2.21428	1.14684	2.21428	up	1.95108	0.964275	1.95108	up		3099	Hs.591588	gb:AI761561 /DB_XREF=gi:5177228 /DB_XREF=wi61h11.x1 /CLONE=IMAGE:2394789 /FEA=FLmRNA /CNT=127 /TID=Hs.198427.0 /TIER=Stack /STK=53 /UG=Hs.198427 /LL=3099 /UG_GENE=HK2 /UG_TITLE=hexokinase 2 /FL=gb:NM_000189.1 gb:AF148513.1
TNFRSF25	1.01081e-08	1.30708e-10	-1.9425	-0.957912	1.9425	down	-1.30392	-0.382853	1.30392	down	-1.47091	-0.556709	1.47091	down	-1.88304	-0.913066	1.88304	down	-1.45948	-0.54545	1.45948	down	-1.81224	-0.85777	1.81224	down	-1.80347	-0.850773	1.80347	down		8718	Hs.462529	gb:AF026071.1 /DB_XREF=gi:2570832 /GEN=DR3 /FEA=FLmRNA /CNT=2 /TID=Hs.180338.1 /TIER=FL /STK=0 /UG=Hs.180338 /LL=8718 /DEF=Homo sapiens soluble death receptor 3 beta (DR3) mRNA, complete cds. /PROD=soluble death receptor 3 beta /FL=gb:AF026071.1
MSRA	1.01204e-08	1.31052e-10	2.45368	1.29494	2.45368	up	1.65433	0.726244	1.65433	up	1.64431	0.717481	1.64431	up	2.11793	1.08266	2.11793	up	1.65353	0.725552	1.65353	up	2.31257	1.2095	2.31257	up	2.46554	1.3019	2.46554	up		4482	Hs.490981	gb:NM_012331.2 /DB_XREF=gi:13259538 /GEN=MSRA /FEA=FLmRNA /CNT=56 /TID=Hs.26458.0 /TIER=FL+Stack /STK=37 /UG=Hs.26458 /LL=4482 /DEF=Homo sapiens methionine sulfoxide reductase A (MSRA), mRNA. /PROD=methionine sulfoxide reductase A /FL=gb:AF183420.1 gb:NM_012331.2
DIS3L2	1.02234e-08	1.32573e-10	-1.77284	-0.826066	1.77284	down	-2.55028	-1.35066	2.55028	down	-1.7719	-0.825295	1.7719	down	-2.49979	-1.32181	2.49979	down	-1.80892	-0.855126	1.80892	down	-2.68852	-1.42681	2.68852	down	-3.1905	-1.67378	3.1905	down		129563		gb:AW665509 /DB_XREF=gi:7458056 /DB_XREF=hj04g09.x1 /CLONE=IMAGE:2980864 /FEA=EST /CNT=5 /TID=Hs.12755.0 /TIER=ConsEnd /STK=3 /UG=Hs.12755 /UG_TITLE=ESTs
CEBPA	1.02509e-08	1.33117e-10	2.11224	1.07877	2.11224	up	1.71652	0.779487	1.71652	up	1.64758	0.72035	1.64758	up	2.39043	1.25727	2.39043	up	1.66696	0.737216	1.66696	up	2.11414	1.08007	2.11414	up	2.22108	1.15126	2.22108	up		1050	Hs.76171	gb:NM_004364.1 /DB_XREF=gi:4757971 /GEN=CEBPA /FEA=FLmRNA /CNT=189 /TID=Hs.76171.0 /TIER=FL /STK=0 /UG=Hs.76171 /LL=1050 /DEF=Homo sapiens CCAATenhancer binding protein (CEBP), alpha (CEBPA), mRNA. /PROD=CCAATenhancer binding protein (CEBP), alpha /FL=gb:NM_004364.1
TASP1	1.04376e-08	1.35732e-10	-1.37368	-0.458041	1.37368	down	-1.51837	-0.602521	1.51837	down	-1.37546	-0.459915	1.37546	down	-1.60202	-0.679889	1.60202	down	-1.25713	-0.330132	1.25713	down	-1.71446	-0.77775	1.71446	down	-1.68994	-0.756976	1.68994	down		55617	Hs.348297	gb:NM_017714.1 /DB_XREF=gi:8923201 /GEN=FLJ20212 /FEA=FLmRNA /CNT=47 /TID=Hs.88367.0 /TIER=FL /STK=0 /UG=Hs.88367 /LL=55617 /DEF=Homo sapiens hypothetical protein FLJ20212 (FLJ20212), mRNA. /PROD=hypothetical protein FLJ20212 /FL=gb:NM_017714.1
PGS1	1.04774e-08	1.36441e-10	2.799	1.48491	2.799	up	2.38175	1.25202	2.38175	up	2.01551	1.01114	2.01551	up	2.9485	1.55998	2.9485	up	2.31847	1.21317	2.31847	up	3.23065	1.69182	3.23065	up	3.35768	1.74746	3.35768	up		9489	Hs.375975///Hs.654671	gb:NM_024419.1 /DB_XREF=gi:13259369 /GEN=PGS1 /FEA=FLmRNA /CNT=28 /TID=Hs.278682.0 /TIER=FL+Stack /STK=15 /UG=Hs.278682 /LL=9489 /DEF=Homo sapiens Phosphatidylglycerophosphate Synthase (PGS1), mRNA. /PROD=Phosphatidylglycerophosphate Synthase /FL=gb:NM_024419.1
LY9	1.05698e-08	1.37838e-10	-2.87713	-1.52463	2.87713	down	-1.48156	-0.567118	1.48156	down	-2.2131	-1.14607	2.2131	down	-2.91119	-1.54161	2.91119	down	-2.05242	-1.03733	2.05242	down	-3.34858	-1.74355	3.34858	down	-2.87582	-1.52397	2.87582	down		4063	Hs.403857	gb:AI524095 /DB_XREF=gi:4438230 /DB_XREF=th09a05.x1 /CLONE=IMAGE:2117744 /FEA=EST /CNT=13 /TID=Hs.111339.0 /TIER=Stack /STK=10 /UG=Hs.111339 /UG_TITLE=ESTs
MYOM2	1.08802e-08	1.42084e-10	-2.24737	-1.16824	2.24737	down	-2.52748	-1.3377	2.52748	down	-2.2619	-1.17753	2.2619	down	-2.62651	-1.39315	2.62651	down	-2.07322	-1.05187	2.07322	down	-2.70103	-1.43351	2.70103	down	-2.81698	-1.49415	2.81698	down		9172	Hs.443683	gb:NM_003970.1 /DB_XREF=gi:4505314 /GEN=MYOM2 /FEA=FLmRNA /CNT=51 /TID=Hs.79227.0 /TIER=FL /STK=0 /UG=Hs.79227 /LL=9172 /DEF=Homo sapiens myomesin (M-protein) 2 (165kD) (MYOM2), mRNA. /PROD=myomesin 2 /FL=gb:NM_003970.1
FMNL3	1.09251e-08	1.4287e-10	-1.51057	-0.595089	1.51057	down	-1.63784	-0.711799	1.63784	down	-1.45718	-0.54318	1.45718	down	-1.58794	-0.667154	1.58794	down	-1.41025	-0.495948	1.41025	down	-1.6945	-0.760857	1.6945	down	-1.57033	-0.651063	1.57033	down		91010		gb:AW027431 /DB_XREF=gi:5886187 /DB_XREF=wv73f10.x1 /CLONE=IMAGE:2535211 /FEA=EST /CNT=8 /TID=Hs.179838.0 /TIER=Stack /STK=8 /UG=Hs.179838 /UG_TITLE=ESTs, Moderately similar to T46402 hypothetical protein DKFZp434H2121.1 (H.sapiens)
WDFY3	1.09414e-08	1.43284e-10	3.84731	1.94385	3.84731	up	2.66073	1.41182	2.66073	up	2.71041	1.43851	2.71041	up	3.34604	1.74245	3.34604	up	2.25299	1.17184	2.25299	up	3.1119	1.6378	3.1119	up	2.79039	1.48047	2.79039	up		23001	Hs.480116	gb:AL536319 /DB_XREF=gi:12799812 /DB_XREF=AL536319 /CLONE=CS0DF015YG13 (3 prime) /FEA=mRNA /CNT=134 /TID=Hs.198135.0 /TIER=Stack /STK=18 /UG=Hs.198135 /LL=23001 /UG_GENE=KIAA0993 /UG_TITLE=KIAA0993 protein
PTGDR	1.09686e-08	1.44042e-10	-2.20288	-1.13939	2.20288	down	-1.49279	-0.578013	1.49279	down	-2.05946	-1.04227	2.05946	down	-3.18743	-1.6724	3.18743	down	-2.4672	-1.30288	2.4672	down	-3.63865	-1.8634	3.63865	down	-3.34808	-1.74333	3.34808	down		5729	Hs.306831	gb:AI460323 /DB_XREF=gi:4313204 /DB_XREF=ao95a01.x1 /CLONE=IMAGE:1953576 /FEA=mRNA /CNT=2 /TID=Hs.158326.0 /TIER=ConsEnd /STK=1 /UG=Hs.158326 /LL=5729 /UG_GENE=PTGDR /UG_TITLE=prostaglandin D2 receptor (DP)
	1.09686e-08	1.4401e-10	1.57463	0.655009	1.57463	up	1.82949	0.871441	1.82949	up	1.73644	0.796136	1.73644	up	1.87513	0.906991	1.87513	up	1.4797	0.565301	1.4797	up	1.76218	0.817357	1.76218	up	1.85269	0.88962	1.85269	up			Hs.668249	gb:AI871655 /DB_XREF=gi:5545704 /DB_XREF=we28g08.x1 /CLONE=IMAGE:2342462 /FEA=EST /CNT=5 /TID=Hs.200815.0 /TIER=ConsEnd /STK=5 /UG=Hs.200815 /UG_TITLE=ESTs
ZBTB4	1.09899e-08	1.44522e-10	-2.01798	-1.01291	2.01798	down	-1.83006	-0.87189	1.83006	down	-1.94254	-0.957945	1.94254	down	-2.23556	-1.16064	2.23556	down	-1.77263	-0.825893	1.77263	down	-2.32788	-1.21902	2.32788	down	-2.64214	-1.40171	2.64214	down		57659	Hs.35096	gb:AI669498 /DB_XREF=gi:4834272 /DB_XREF=wb88e05.x1 /CLONE=IMAGE:2312768 /FEA=EST /CNT=78 /TID=Hs.35096.0 /TIER=Stack /STK=32 /UG=Hs.35096 /LL=57659 /UG_GENE=KIAA1538 /UG_TITLE=KIAA1538 protein
DOK3	1.09925e-08	1.44758e-10	2.2776	1.18751	2.2776	up	2.33921	1.22602	2.33921	up	2.13024	1.09101	2.13024	up	3.02305	1.59601	3.02305	up	2.13127	1.09171	2.13127	up	2.73415	1.45109	2.73415	up	3.29655	1.72096	3.29655	up		79930	Hs.720849	gb:BC004564.1 /DB_XREF=gi:13528734 /FEA=FLmRNA /CNT=30 /TID=Hs.122559.1 /TIER=FL+Stack /STK=12 /UG=Hs.122559 /DEF=Homo sapiens, Similar to hypothetical protein FLJ22570, clone MGC:10476, mRNA, complete cds. /PROD=Similar to hypothetical protein FLJ22570 /FL=gb:BC004564.1
PDZD8	1.10971e-08	1.46338e-10	2.14988	1.10426	2.14988	up	1.92541	0.945165	1.92541	up	1.97641	0.982883	1.97641	up	1.91361	0.936297	1.91361	up	1.63763	0.711606	1.63763	up	2.1128	1.07915	2.1128	up	1.91886	0.94025	1.91886	up		118987	Hs.501149	gb:AI052247 /DB_XREF=gi:3308238 /DB_XREF=oz21c03.x1 /CLONE=IMAGE:1675972 /FEA=mRNA /CNT=66 /TID=Hs.131834.0 /TIER=Stack /STK=12 /UG=Hs.131834 /UG_TITLE=Homo sapiens mRNA; cDNA DKFZp434B0328 (from clone DKFZp434B0328); partial cds
LINC01013	1.11237e-08	1.46892e-10	-1.3023	-0.38106	1.3023	down	-1.42635	-0.512327	1.42635	down	-1.4094	-0.495085	1.4094	down	-1.3954	-0.480677	1.3954	down	-1.48717	-0.57257	1.48717	down	-1.4284	-0.514405	1.4284	down	-1.49555	-0.580681	1.49555	down		100507254	Hs.103070	gb:W46364 /DB_XREF=gi:1330865 /DB_XREF=zc30h06.s1 /CLONE=IMAGE:323867 /FEA=EST /CNT=5 /TID=Hs.103070.0 /TIER=ConsEnd /STK=3 /UG=Hs.103070 /UG_TITLE=ESTs
LOC283588///RPS6KA5	1.11956e-08	1.48046e-10	-1.55951	-0.641096	1.55951	down	-1.72682	-0.788115	1.72682	down	-1.16026	-0.214453	1.16026	down	-1.77064	-0.824275	1.77064	down	-1.40356	-0.489092	1.40356	down	-1.94311	-0.958369	1.94311	down	-1.80511	-0.852089	1.80511	down		9252///283588	Hs.46519	gb:AK095276.1 /DB_XREF=gi:21754501 /TID=Hs2.46519.1 /CNT=10 /FEA=mRNA /TIER=ConsEnd /STK=1 /UG=Hs.46519 /UG_TITLE=Homo sapiens cDNA FLJ31396 fis, clone NT2NE1000156. /DEF=Homo sapiens cDNA FLJ37957 fis, clone CTONG2009529.
NMNAT1	1.13081e-08	1.4974e-10	1.46969	0.555517	1.46969	up	1.35991	0.443512	1.35991	up	1.56199	0.643386	1.56199	up	1.83043	0.872183	1.83043	up	1.65092	0.723271	1.65092	up	1.71837	0.781037	1.71837	up	1.94705	0.961291	1.94705	up		64802	Hs.633762	gb:AF312734.1 /DB_XREF=gi:11245471 /FEA=FLmRNA /CNT=15 /TID=Hs.156888.0 /TIER=FL /STK=0 /UG=Hs.156888 /LL=64802 /UG_GENE=NMNAT /DEF=Homo sapiens NMN adenylyltransferase mRNA, complete cds. /PROD=NMN adenylyltransferase /FL=gb:AF314163.1 gb:AF312734.1 gb:NM_022787.1
ZMAT5	1.13609e-08	1.50856e-10	1.1757	0.233525	1.1757	up	1.05864	0.0822181	1.05864	up	1.1714	0.228237	1.1714	up	1.31489	0.394945	1.31489	up	1.25751	0.330569	1.25751	up	1.37137	0.455618	1.37137	up	1.48299	0.568506	1.48299	up		55954	Hs.713647	gb:NM_019103.1 /DB_XREF=gi:9506862 /GEN=LOC55954 /FEA=FLmRNA /CNT=98 /TID=Hs.38628.0 /TIER=FL+Stack /STK=74 /UG=Hs.38628 /LL=55954 /DEF=Homo sapiens hypothetical protein (LOC55954), mRNA. /PROD=hypothetical protein /FL=gb:NM_019103.1
PCNXL2	1.13609e-08	1.50829e-10	-1.63875	-0.712599	1.63875	down	-1.57709	-0.657266	1.57709	down	-1.64863	-0.721265	1.64863	down	-1.79514	-0.844096	1.79514	down	-1.46813	-0.553981	1.46813	down	-2.01242	-1.00893	2.01242	down	-2.01071	-1.0077	2.01071	down		80003		gb:AI768826 /DB_XREF=gi:5235335 /DB_XREF=wj03g03.x1 /CLONE=IMAGE:2401780 /FEA=EST /CNT=18 /TID=Hs.137396.1 /TIER=Stack /STK=17 /UG=Hs.137396 /UG_TITLE=ESTs
IL1RN	1.15723e-08	1.53874e-10	1.58384	0.663431	1.58384	up	2.23272	1.1588	2.23272	up	1.63049	0.70531	1.63049	up	2.16512	1.11445	2.16512	up	1.55634	0.638162	1.55634	up	2.27883	1.1883	2.27883	up	2.49932	1.32154	2.49932	up		3557	Hs.81134	gb:AW083357 /DB_XREF=gi:6038509 /DB_XREF=xc08g03.x1 /CLONE=IMAGE:2583700 /FEA=mRNA /CNT=107 /TID=Hs.81134.0 /TIER=Stack /STK=11 /UG=Hs.81134 /LL=3557 /UG_GENE=IL1RN /UG_TITLE=interleukin 1 receptor antagonist
ENTPD7	1.1663e-08	1.55293e-10	2.99594	1.58301	2.99594	up	1.87658	0.908108	1.87658	up	1.43426	0.520306	1.43426	up	2.00027	1.00019	2.00027	up	1.51749	0.601688	1.51749	up	2.9448	1.55817	2.9448	up	2.28882	1.1946	2.28882	up		57089	Hs.28326	gb:BF878343 /DB_XREF=gi:12268473 /DB_XREF=MR0-ET0107-191100-002-a08 /FEA=EST /CNT=12 /TID=Hs.124833.0 /TIER=ConsEnd /STK=0 /UG=Hs.124833 /UG_TITLE=ESTs
	1.1802e-08	1.5736e-10	-1.38127	-0.465995	1.38127	down	-1.43491	-0.520959	1.43491	down	-1.42717	-0.51316	1.42717	down	-1.5234	-0.607295	1.5234	down	-1.33267	-0.41432	1.33267	down	-1.59314	-0.671869	1.59314	down	-1.64901	-0.721601	1.64901	down				gb:AV649579 /DB_XREF=gi:9870593 /DB_XREF=AV649579 /CLONE=GLCBVD12 /FEA=EST /CNT=25 /TID=Hs.260238.1 /TIER=Stack /STK=21 /UG=Hs.260238 /LL=55750 /UG_GENE=FLJ10842 /UG_TITLE=hypothetical protein FLJ10842
RBM15	1.1949e-08	1.59539e-10	-1.22819	-0.296533	1.22819	down	-1.53895	-0.62195	1.53895	down	-1.2858	-0.362661	1.2858	down	-1.40022	-0.485649	1.40022	down	-1.38773	-0.472727	1.38773	down	-1.51324	-0.597638	1.51324	down	-1.66998	-0.739828	1.66998	down		64783	Hs.435947///Hs.708172	gb:AF364037.1 /DB_XREF=gi:14210074 /GEN=MKL1RBM15 fusion /TID=Hs2.433153.1 /CNT=1 /FEA=FLmRNA /TIER=FL /STK=1 /UG=Hs.433153 /DEF=Homo sapiens megakaryoblastic leukemia-1 proteinRNA-binding motif protein 15s + ae fusion protein (MKL1RBM15 fusion) mRNA, complete cds. /PROD=megakaryoblastic leukemia-1 proteinRNA-bindingmotif protein 15s + ae fusion protein /FL=gb:AF364037.1
ZNF548	1.20566e-08	1.61196e-10	-1.17227	-0.2293	1.17227	down	-1.36858	-0.452683	1.36858	down	-1.17975	-0.238487	1.17975	down	-1.31898	-0.399421	1.31898	down	-1.20035	-0.263458	1.20035	down	-1.34016	-0.422409	1.34016	down	-1.37088	-0.455102	1.37088	down		147694	Hs.126905	gb:AK057494.1 /DB_XREF=gi:16553222 /TID=Hs2.374782.2 /CNT=8 /FEA=mRNA /TIER=ConsEnd /STK=0 /LL=147694 /UG_GENE=FLJ32932 /UG=Hs.374782 /UG_TITLE=hypothetical protein FLJ32932 /DEF=Homo sapiens cDNA FLJ32932 fis, clone TESTI2007464, weakly similar to ZINC FINGER PROTEIN 85.
DUSP3	1.25728e-08	1.68557e-10	1.43519	0.521245	1.43519	up	1.63374	0.708177	1.63374	up	1.34337	0.425852	1.34337	up	1.79389	0.843095	1.79389	up	1.46508	0.550977	1.46508	up	1.86251	0.897251	1.86251	up	1.81442	0.859508	1.81442	up		1845	Hs.181046	gb:AL048503 /DB_XREF=gi:5936534 /DB_XREF=DKFZp586M1524_s1 /CLONE=DKFZp586M1524 /FEA=FLmRNA /CNT=241 /TID=Hs.181046.0 /TIER=Stack /STK=44 /UG=Hs.181046 /LL=1845 /UG_GENE=DUSP3 /UG_TITLE=dual specificity phosphatase 3 (vaccinia virus phosphatase VH1-related) /FL=gb:BC002682.1 gb:NM_004090.1 gb:L05147.1
GSR	1.25728e-08	1.68455e-10	1.48545	0.570895	1.48545	up	1.54532	0.627903	1.54532	up	1.45682	0.542827	1.45682	up	1.78215	0.833616	1.78215	up	1.76454	0.819296	1.76454	up	2.15678	1.10888	2.15678	up	2.12711	1.0889	2.12711	up		2936	Hs.271510	gb:AI888037 /DB_XREF=gi:5593201 /DB_XREF=wm27f04.x1 /CLONE=IMAGE:2437183 /FEA=EST /CNT=76 /TID=Hs.193974.0 /TIER=Stack /STK=51 /UG=Hs.193974 /UG_TITLE=ESTs, Weakly similar to ALU1_HUMAN ALU SUBFAMILY J SEQUENCE CONTAMINATION WARNING ENTRY (H.sapiens)
XPO4	1.28803e-08	1.72915e-10	-1.54105	-0.623911	1.54105	down	-1.67429	-0.743554	1.67429	down	-1.38376	-0.468591	1.38376	down	-1.77669	-0.829195	1.77669	down	-1.4858	-0.571236	1.4858	down	-1.80208	-0.849665	1.80208	down	-1.90694	-0.931263	1.90694	down		64328	Hs.507452	gb:BF968638 /DB_XREF=gi:12335853 /DB_XREF=602271075F1 /CLONE=IMAGE:4359163 /FEA=FLmRNA /CNT=106 /TID=Hs.117102.0 /TIER=Stack /STK=45 /UG=Hs.117102 /LL=64328 /UG_GENE=FLJ13046 /UG_TITLE=hypothetical protein FLJ13046 similar to exportin 4; KIAA1721 protein /FL=gb:NM_022459.1
EPHX2	1.29152e-08	1.7362e-10	-1.69006	-0.757074	1.69006	down	-1.53171	-0.615147	1.53171	down	-1.54256	-0.625328	1.54256	down	-1.86272	-0.897412	1.86272	down	-1.51038	-0.594916	1.51038	down	-1.79459	-0.843655	1.79459	down	-1.79387	-0.843077	1.79387	down		2053	Hs.212088	gb:AF233336.1 /DB_XREF=gi:10197683 /GEN=EPHX2 /FEA=FLmRNA /CNT=103 /TID=Hs.113.0 /TIER=FL /STK=0 /UG=Hs.113 /LL=2053 /DEF=Homo sapiens clone 129-13 soluble epoxide hydrolase (EPHX2) mRNA, complete cds. /PROD=soluble epoxide hydrolase /FL=gb:NM_001979.1 gb:AF233334.1 gb:AF233336.1 gb:AF233335.1 gb:L05779.1
ABCB1///ABCB4	1.30389e-08	1.75522e-10	-1.48283	-0.568352	1.48283	down	-1.48035	-0.565937	1.48035	down	-1.55739	-0.639127	1.55739	down	-1.50544	-0.590189	1.50544	down	-1.411	-0.496718	1.411	down	-1.67452	-0.74375	1.67452	down	-1.6951	-0.761368	1.6951	down		5243///5244	Hs.489033///Hs.654403	gb:AF016535.1 /DB_XREF=gi:2353263 /GEN=mdr1 /FEA=FLmRNA /CNT=35 /TID=Hs.21330.0 /TIER=FL /STK=7 /UG=Hs.21330 /LL=5243 /DEF=Homo sapiens P-glycoprotein (mdr1) mRNA, complete cds. /PROD=P-glycoprotein /FL=gb:AF016535.1 gb:M14758.1 gb:NM_000927.2
ITGA4	1.31133e-08	1.76929e-10	-2.30334	-1.20373	2.30334	down	-2.03897	-1.02784	2.03897	down	-1.68108	-0.749385	1.68108	down	-2.66703	-1.41524	2.66703	down	-1.73615	-0.795891	1.73615	down	-3.12818	-1.64532	3.12818	down	-3.0831	-1.62438	3.0831	down		3676	Hs.440955	gb:BG532690 /DB_XREF=gi:13524229 /DB_XREF=602580263F1 /CLONE=IMAGE:4718390 /FEA=EST /CNT=41 /TID=Hs.40034.1 /TIER=Stack /STK=15 /UG=Hs.40034 /LL=3676 /UG_GENE=ITGA4 /UG_TITLE=integrin, alpha 4 (antigen CD49D, alpha 4 subunit of VLA-4 receptor)
RAD1	1.31133e-08	1.77002e-10	-1.36468	-0.448567	1.36468	down	-1.4254	-0.511366	1.4254	down	-1.47526	-0.560972	1.47526	down	-1.58121	-0.661033	1.58121	down	-1.31164	-0.391369	1.31164	down	-1.50515	-0.589911	1.50515	down	-1.52028	-0.604337	1.52028	down		5810	Hs.38114	gb:AI796010 /DB_XREF=gi:5361473 /DB_XREF=wh41c06.x1 /CLONE=IMAGE:2383306 /FEA=EST /CNT=16 /TID=Hs.34392.0 /TIER=Stack /STK=10 /UG=Hs.34392 /UG_TITLE=ESTs
ANKRD10	1.32373e-08	1.78918e-10	-1.47564	-0.561339	1.47564	down	-1.70307	-0.768142	1.70307	down	-1.59775	-0.676039	1.59775	down	-1.73074	-0.791385	1.73074	down	-1.48776	-0.573143	1.48776	down	-1.81747	-0.861929	1.81747	down	-1.97771	-0.983831	1.97771	down		55608	Hs.525163	gb:BC001727.1 /DB_XREF=gi:12804610 /FEA=FLmRNA /CNT=96 /TID=Hs.298998.0 /TIER=FL+Stack /STK=66 /UG=Hs.298998 /DEF=Homo sapiens, Similar to hypothetical protein FLJ20093, clone MGC:1076, mRNA, complete cds. /PROD=Similar to hypothetical protein FLJ20093 /FL=gb:BC001727.1
NSUN7	1.32893e-08	1.79865e-10	4.25613	2.08954	4.25613	up	2.72797	1.44783	2.72797	up	2.83037	1.50099	2.83037	up	3.57526	1.83805	3.57526	up	2.94674	1.55912	2.94674	up	3.99002	1.99639	3.99002	up	3.81465	1.93155	3.81465	up		79730	Hs.570821	gb:AI538394 /DB_XREF=gi:4452529 /DB_XREF=tp53f03.x1 /CLONE=IMAGE:2191517 /FEA=EST /CNT=8 /TID=Hs.293514.0 /TIER=ConsEnd /STK=1 /UG=Hs.293514 /UG_TITLE=ESTs
PNOC	1.36534e-08	1.85042e-10	-1.51489	-0.599216	1.51489	down	-1.63246	-0.707046	1.63246	down	-1.70015	-0.765666	1.70015	down	-1.74459	-0.802892	1.74459	down	-1.39797	-0.48333	1.39797	down	-2.07093	-1.05028	2.07093	down	-1.98011	-0.985583	1.98011	down		5368	Hs.88218	gb:NM_006228.2 /DB_XREF=gi:11079650 /GEN=PNOC /FEA=FLmRNA /CNT=29 /TID=Hs.89040.0 /TIER=FL+Stack /STK=18 /UG=Hs.89040 /LL=5368 /DEF=Homo sapiens prepronociceptin (PNOC), mRNA. /PROD=prepronociceptin /FL=gb:U48263.1 gb:NM_006228.2
DACH1	1.38394e-08	1.87816e-10	3.11912	1.64114	3.11912	up	1.74941	0.806867	1.74941	up	1.99072	0.99329	1.99072	up	2.73951	1.45392	2.73951	up	2.02802	1.02007	2.02802	up	3.83087	1.93767	3.83087	up	3.1164	1.63988	3.1164	up		1602	Hs.129452	gb:AI650353 /DB_XREF=gi:4734332 /DB_XREF=wa18h01.x1 /CLONE=IMAGE:2298481 /FEA=EST /CNT=16 /TID=Hs.30098.0 /TIER=Stack /STK=11 /UG=Hs.30098 /UG_TITLE=ESTs
G6PD	1.38611e-08	1.88363e-10	1.60629	0.683732	1.60629	up	1.21825	0.284809	1.21825	up	1.57691	0.6571	1.57691	up	2.31001	1.2079	2.31001	up	1.9736	0.980827	1.9736	up	2.30653	1.20573	2.30653	up	2.68865	1.42688	2.68865	up		2539	Hs.461047	gb:NM_000402.1 /DB_XREF=gi:4503844 /GEN=G6PD /FEA=FLmRNA /CNT=225 /TID=Hs.80206.0 /TIER=FL+Stack /STK=58 /UG=Hs.80206 /LL=2539 /DEF=Homo sapiens glucose-6-phosphate dehydrogenase (G6PD), nuclear gene encoding mitochondrial protein, mRNA. /PROD=glucose-6-phosphate dehydrogenase /FL=gb:BC000337.1 gb:NM_000402.1 gb:M21248.1
ZYX	1.39134e-08	1.89329e-10	1.70608	0.770689	1.70608	up	1.83637	0.876858	1.83637	up	1.56269	0.644036	1.56269	up	2.59363	1.37497	2.59363	up	1.98826	0.991504	1.98826	up	2.24675	1.16784	2.24675	up	3.13699	1.64938	3.13699	up		7791	Hs.490415	gb:NM_003461.1 /DB_XREF=gi:4508046 /GEN=ZYX /FEA=FLmRNA /CNT=379 /TID=Hs.75873.0 /TIER=FL+Stack /STK=154 /UG=Hs.75873 /LL=7791 /DEF=Homo sapiens zyxin (ZYX), mRNA. /PROD=zyxin /FL=gb:NM_003461.1
RAB27A	1.39175e-08	1.89639e-10	2.51873	1.3327	2.51873	up	2.0875	1.06178	2.0875	up	2.21474	1.14714	2.21474	up	2.68254	1.4236	2.68254	up	2.48058	1.31068	2.48058	up	2.91147	1.54175	2.91147	up	2.82365	1.49756	2.82365	up		5873	Hs.654978	gb:BE502030 /DB_XREF=gi:9704438 /DB_XREF=hy11d05.x1 /CLONE=IMAGE:3197001 /FEA=FLmRNA /CNT=83 /TID=Hs.50477.1 /TIER=Stack /STK=12 /UG=Hs.50477 /LL=5873 /UG_GENE=RAB27A /UG_TITLE=RAB27A, member RAS oncogene family /FL=gb:U38654.3
ACTN1	1.3983e-08	1.90787e-10	1.23025	0.298952	1.23025	up	1.43444	0.520487	1.43444	up	1.33095	0.412454	1.33095	up	1.6532	0.725258	1.6532	up	1.35079	0.433799	1.35079	up	1.55314	0.635187	1.55314	up	1.92984	0.94848	1.92984	up		87	Hs.509765	gb:M95178.1 /DB_XREF=gi:178051 /GEN=ACTN1 /FEA=FLmRNA /CNT=1 /TID=Hs.119000.0 /TIER=FL /STK=0 /UG=Hs.119000 /LL=87 /DEF=Human non-muscle alpha-actinin mRNA, complete cds. /PROD=alpha-actinin /FL=gb:M95178.1
LINC01013	1.39865e-08	1.91091e-10	-1.30025	-0.378786	1.30025	down	-1.42833	-0.514328	1.42833	down	-1.33246	-0.414089	1.33246	down	-1.3687	-0.452808	1.3687	down	-1.35298	-0.436143	1.35298	down	-1.3239	-0.404799	1.3239	down	-1.31628	-0.396472	1.31628	down		100507254	Hs.103070	gb:BC040870.1 /DB_XREF=gi:26454752 /TID=Hs2.435379.1 /CNT=6 /FEA=mRNA /TIER=ConsEnd /STK=0 /UG=Hs.435379 /UG_TITLE=Homo sapiens, clone IMAGE:5583725, mRNA /DEF=Homo sapiens, clone IMAGE:5583725, mRNA.
	1.40542e-08	1.92274e-10	-1.58165	-0.661431	1.58165	down	-1.76916	-0.823062	1.76916	down	-1.36645	-0.450431	1.36645	down	-1.73611	-0.795859	1.73611	down	-1.47843	-0.564071	1.47843	down	-1.99408	-0.995723	1.99408	down	-2.03282	-1.02348	2.03282	down			Hs.130260	gb:AI695695 /DB_XREF=gi:4983595 /DB_XREF=tu27a01.x1 /CLONE=IMAGE:2252232 /FEA=EST /CNT=6 /TID=Hs.130260.0 /TIER=ConsEnd /STK=0 /UG=Hs.130260 /UG_TITLE=ESTs
	1.40631e-08	1.92652e-10	-1.36411	-0.447957	1.36411	down	-1.54322	-0.625944	1.54322	down	-1.34652	-0.429241	1.34652	down	-1.48158	-0.567141	1.48158	down	-1.29208	-0.369695	1.29208	down	-1.65012	-0.722568	1.65012	down	-1.59786	-0.676139	1.59786	down				gb:BG484601 /DB_XREF=gi:13416880 /DB_XREF=602505772F1 /CLONE=IMAGE:4619369 /FEA=EST /CNT=8 /TID=Hs.282899.0 /TIER=ConsEnd /STK=0 /UG=Hs.282899 /UG_TITLE=ESTs
CMTM4	1.41069e-08	1.9351e-10	2.39579	1.2605	2.39579	up	2.09682	1.0682	2.09682	up	1.92969	0.948369	1.92969	up	2.34905	1.23208	2.34905	up	1.84564	0.884124	1.84564	up	2.71674	1.44188	2.71674	up	2.37767	1.24955	2.37767	up		146223	Hs.643961	gb:AA191708 /DB_XREF=gi:1780388 /DB_XREF=zp82d10.s1 /CLONE=IMAGE:626707 /FEA=mRNA /CNT=138 /TID=Hs.325825.0 /TIER=Stack /STK=14 /UG=Hs.325825 /UG_TITLE=Homo sapiens cDNA FLJ20848 fis, clone ADKA01732
ZNF22	1.42004e-08	1.95053e-10	-1.81988	-0.863841	1.81988	down	-2.07815	-1.0553	2.07815	down	-1.8582	-0.893906	1.8582	down	-2.31585	-1.21154	2.31585	down	-1.75856	-0.814395	1.75856	down	-2.25763	-1.17481	2.25763	down	-2.67451	-1.41928	2.67451	down		7570	Hs.462693	gb:AA744771 /DB_XREF=gi:2783535 /DB_XREF=ny71d07.s1 /CLONE=IMAGE:1283725 /FEA=FLmRNA /CNT=157 /TID=Hs.108642.0 /TIER=Stack /STK=58 /UG=Hs.108642 /LL=7570 /UG_GENE=ZNF22 /UG_TITLE=zinc finger protein 22 (KOX 15) /FL=gb:NM_006963.1
RBM26	1.45307e-08	1.99855e-10	-1.88293	-0.912982	1.88293	down	-2.87238	-1.52225	2.87238	down	-1.88702	-0.916108	1.88702	down	-2.65995	-1.4114	2.65995	down	-1.97893	-0.984721	1.97893	down	-2.93819	-1.55493	2.93819	down	-3.26851	-1.70863	3.26851	down		64062	Hs.596629	gb:BF592957 /DB_XREF=gi:11685281 /DB_XREF=7j97d11.x1 /CLONE=IMAGE:3442629 /FEA=EST /CNT=45 /TID=Hs.104413.0 /TIER=Stack /STK=26 /UG=Hs.104413 /UG_TITLE=ESTs
LDLRAP1	1.48111e-08	2.03983e-10	-2.21276	-1.14585	2.21276	down	-1.76067	-0.816126	1.76067	down	-1.7743	-0.827248	1.7743	down	-1.89493	-0.922147	1.89493	down	-1.53691	-0.620036	1.53691	down	-2.33214	-1.22165	2.33214	down	-2.12198	-1.08541	2.12198	down		26119	Hs.590911	gb:AL545035 /DB_XREF=gi:12877516 /DB_XREF=AL545035 /CLONE=CS0DI013YH20 (3 prime) /FEA=mRNA /CNT=113 /TID=Hs.184482.0 /TIER=Stack /STK=11 /UG=Hs.184482 /LL=26119 /UG_GENE=DKFZP586D0624 /UG_TITLE=DKFZP586D0624 protein
	1.4852e-08	2.04817e-10	-1.62827	-0.703342	1.62827	down	-1.98239	-0.987242	1.98239	down	-1.58723	-0.666514	1.58723	down	-1.81073	-0.85657	1.81073	down	-1.34399	-0.426523	1.34399	down	-1.82873	-0.870843	1.82873	down	-1.83891	-0.878853	1.83891	down				gb:AI627803 /DB_XREF=gi:4664603 /DB_XREF=ty82c08.x1 /CLONE=IMAGE:2285582 /FEA=EST /CNT=7 /TID=Hs.65946.0 /TIER=ConsEnd /STK=7 /UG=Hs.65946 /UG_TITLE=ESTs
KDM6B	1.49577e-08	2.06823e-10	1.7863	0.836977	1.7863	up	1.89152	0.919543	1.89152	up	1.67871	0.747354	1.67871	up	2.31437	1.21062	2.31437	up	1.78353	0.834735	1.78353	up	2.08918	1.06294	2.08918	up	2.59422	1.3753	2.59422	up		23135	Hs.223678	Cluster Incl. AB002344:Human mRNA for KIAA0346 gene, partial cds /cds=(0,4852) /gb=AB002344 /gi=2280479 /ug=Hs.103915 /len=6121
TPD52	1.49577e-08	2.06608e-10	-1.32782	-0.409065	1.32782	down	-1.37672	-0.461233	1.37672	down	-1.4133	-0.499066	1.4133	down	-1.42977	-0.515779	1.42977	down	-1.3154	-0.395507	1.3154	down	-1.58096	-0.660797	1.58096	down	-1.60686	-0.684248	1.60686	down		7163	Hs.368433	gb:AI632972 /DB_XREF=gi:4684302 /DB_XREF=tx55h08.x1 /CLONE=IMAGE:2273535 /FEA=EST /CNT=7 /TID=Hs.123370.0 /TIER=ConsEnd /STK=7 /UG=Hs.123370 /UG_TITLE=ESTs
PRPF40A	1.49721e-08	2.07295e-10	-1.36896	-0.453082	1.36896	down	-1.58265	-0.662343	1.58265	down	-1.28918	-0.366451	1.28918	down	-1.63985	-0.713562	1.63985	down	-1.47411	-0.559839	1.47411	down	-1.79778	-0.846219	1.79778	down	-1.79529	-0.844219	1.79529	down		55660	Hs.643580	gb:AI743993 /DB_XREF=gi:5112281 /DB_XREF=wc32d10.x1 /CLONE=IMAGE:2316883 /FEA=EST /CNT=52 /TID=Hs.294008.0 /TIER=Stack /STK=22 /UG=Hs.294008 /UG_TITLE=ESTs
TMEM204	1.49984e-08	2.07933e-10	-3.00164	-1.58575	3.00164	down	-2.35759	-1.23731	2.35759	down	-2.37077	-1.24536	2.37077	down	-2.86231	-1.51718	2.86231	down	-2.04812	-1.0343	2.04812	down	-3.36927	-1.75244	3.36927	down	-3.08665	-1.62604	3.08665	down		79652	Hs.459652	gb:NM_024600.1 /DB_XREF=gi:13375800 /GEN=FLJ20898 /FEA=FLmRNA /CNT=58 /TID=Hs.25549.0 /TIER=FL /STK=0 /UG=Hs.25549 /LL=79652 /DEF=Homo sapiens hypothetical protein FLJ20898 (FLJ20898), mRNA. /PROD=hypothetical protein FLJ20898 /FL=gb:NM_024600.1
PRKRIR	1.51183e-08	2.10702e-10	-1.6773	-0.746137	1.6773	down	-1.93744	-0.954152	1.93744	down	-1.55475	-0.636683	1.55475	down	-1.82962	-0.871541	1.82962	down	-1.5344	-0.617679	1.5344	down	-2.04799	-1.03421	2.04799	down	-2.16078	-1.11155	2.16078	down		5612	Hs.503315	gb:AF081567.1 /DB_XREF=gi:9886758 /GEN=DAP4 /FEA=FLmRNA /CNT=139 /TID=Hs.177574.0 /TIER=FL+Stack /STK=57 /UG=Hs.177574 /LL=5612 /DEF=Homo sapiens death associated protein 4 (DAP4) mRNA, complete cds. /PROD=death associated protein 4 /FL=gb:AF081567.1 gb:NM_004705.1 gb:AF007393.1
PCNX	1.51183e-08	2.10542e-10	2.01756	1.01261	2.01756	up	1.98381	0.98827	1.98381	up	1.87592	0.9076	1.87592	up	2.32592	1.2178	2.32592	up	2.07744	1.05481	2.07744	up	2.3442	1.2291	2.3442	up	2.61061	1.38439	2.61061	up		22990	Hs.446559	gb:AB018348.1 /DB_XREF=gi:3882330 /GEN=KIAA0805 /FEA=mRNA /CNT=52 /TID=Hs.55947.0 /TIER=Stack /STK=11 /UG=Hs.55947 /LL=23226 /DEF=Homo sapiens mRNA for KIAA0805 protein, partial cds. /PROD=KIAA0805 protein
C14orf28	1.51183e-08	2.10465e-10	-1.27967	-0.355775	1.27967	down	-1.07716	-0.107232	1.07716	down	-1.23945	-0.309696	1.23945	down	-1.49929	-0.584282	1.49929	down	-1.40353	-0.489061	1.40353	down	-1.49242	-0.577651	1.49242	down	-1.61077	-0.687754	1.61077	down		122525	Hs.82098	gb:BF435952 /DB_XREF=gi:11448267 /DB_XREF=nab75e07.x1 /CLONE=IMAGE:3273685 /FEA=EST /CNT=21 /TID=Hs.82098.0 /TIER=ConsEnd /STK=5 /UG=Hs.82098 /UG_TITLE=ESTs
SSBP2	1.51183e-08	2.10089e-10	-1.22755	-0.295777	1.22755	down	-1.2148	-0.280722	1.2148	down	-1.17787	-0.236184	1.17787	down	-1.31796	-0.398308	1.31796	down	-1.21326	-0.278883	1.21326	down	-1.45767	-0.543661	1.45767	down	-1.41421	-0.499999	1.41421	down		23635		gb:AI692322 /DB_XREF=gi:4969662 /DB_XREF=wd85e07.x1 /CLONE=IMAGE:2338404 /FEA=EST /CNT=7 /TID=Hs.65373.0 /TIER=ConsEnd /STK=4 /UG=Hs.65373 /UG_TITLE=ESTs
ITM2A	1.53448e-08	2.14421e-10	-3.68714	-1.8825	3.68714	down	-3.05986	-1.61347	3.05986	down	-2.96262	-1.56687	2.96262	down	-4.42466	-2.14557	4.42466	down	-2.44857	-1.29194	2.44857	down	-4.0864	-2.03083	4.0864	down	-4.82229	-2.26972	4.82229	down		9452	Hs.17109	gb:AL021786 /DB_XREF=gi:2853186 /FEA=FLmRNA /CNT=188 /TID=Hs.17109.0 /TIER=Stack /STK=19 /UG=Hs.17109 /LL=9452 /UG_GENE=ITM2A /UG_TITLE=integral membrane protein 2A /DEF=Human DNA sequence from PAC 696H22 on chromosome Xq21.1-21.2. Contains a mouse E25 like gene, a Kinesin like pseudogene and ESTs /FL=gb:AF038953.1 gb:NM_004867.1
GPRASP1	1.53448e-08	2.14407e-10	-1.86154	-0.896497	1.86154	down	-1.7593	-0.815003	1.7593	down	-1.59156	-0.670443	1.59156	down	-2.25983	-1.17622	2.25983	down	-1.77381	-0.826855	1.77381	down	-2.5503	-1.35067	2.5503	down	-2.70903	-1.43777	2.70903	down		9737	Hs.729265	gb:NM_014710.1 /DB_XREF=gi:7662129 /GEN=KIAA0443 /FEA=FLmRNA /CNT=43 /TID=Hs.113082.0 /TIER=FL+Stack /STK=11 /UG=Hs.113082 /LL=9737 /DEF=Homo sapiens KIAA0443 gene product (KIAA0443), mRNA. /PROD=KIAA0443 gene product /FL=gb:AB007903.1 gb:NM_014710.1
HIST1H2BD	1.55545e-08	2.17634e-10	2.10164	1.07151	2.10164	up	2.05347	1.03806	2.05347	up	1.79757	0.846047	1.79757	up	2.40437	1.26566	2.40437	up	2.30291	1.20346	2.30291	up	3.00302	1.58641	3.00302	up	2.84302	1.50743	2.84302	up		3017	Hs.591797	gb:BC002842.1 /DB_XREF=gi:12803984 /FEA=FLmRNA /CNT=36 /TID=Hs.180779.0 /TIER=FL /STK=0 /UG=Hs.180779 /LL=3017 /UG_GENE=H2BFB /DEF=Homo sapiens, H2B histone family, member B, clone MGC:3802, mRNA, complete cds. /PROD=H2B histone family, member B /FL=gb:BC002842.1 gb:NM_021063.1
CLUHP3	1.56683e-08	2.19514e-10	-1.48001	-0.565603	1.48001	down	-1.37	-0.454175	1.37	down	-1.44386	-0.529931	1.44386	down	-1.56362	-0.644891	1.56362	down	-1.43775	-0.523813	1.43775	down	-1.76694	-0.821252	1.76694	down	-1.72492	-0.786529	1.72492	down		100132341	Hs.715792	gb:NM_024048.1 /DB_XREF=gi:13129011 /GEN=MGC3020 /FEA=FLmRNA /CNT=32 /TID=Hs.69428.0 /TIER=FL+Stack /STK=19 /UG=Hs.69428 /LL=79014 /DEF=Homo sapiens hypothetical protein MGC3020 (MGC3020), mRNA. /PROD=hypothetical protein MGC3020 /FL=gb:BC000552.1 gb:NM_024048.1
CLEC2D	1.61932e-08	2.27165e-10	-2.32269	-1.2158	2.32269	down	-2.43992	-1.28683	2.43992	down	-2.20518	-1.14089	2.20518	down	-2.75774	-1.46349	2.75774	down	-2.11816	-1.08281	2.11816	down	-2.84977	-1.51085	2.84977	down	-3.24731	-1.69925	3.24731	down		29121	Hs.268326	gb:AA262688 /DB_XREF=gi:1898100 /DB_XREF=zs22g05.s1 /CLONE=IMAGE:685976 /FEA=EST /CNT=11 /TID=Hs.13231.0 /TIER=ConsEnd /STK=4 /UG=Hs.13231 /UG_TITLE=ESTs
MRPS30	1.61973e-08	2.27517e-10	-1.57503	-0.655384	1.57503	down	-1.37054	-0.454747	1.37054	down	-1.42292	-0.508859	1.42292	down	-1.79738	-0.845899	1.79738	down	-1.40292	-0.488436	1.40292	down	-1.92478	-0.944692	1.92478	down	-2.14082	-1.09816	2.14082	down		10884		gb:AI039469 /DB_XREF=gi:3278663 /DB_XREF=ox41a08.s1 /CLONE=IMAGE:1658870 /FEA=EST /CNT=10 /TID=Hs.27362.0 /TIER=ConsEnd /STK=6 /UG=Hs.27362 /UG_TITLE=ESTs
ADGRG5	1.62126e-08	2.28029e-10	-1.76355	-0.818482	1.76355	down	-1.46628	-0.552159	1.46628	down	-1.49182	-0.577078	1.49182	down	-1.67741	-0.746239	1.67741	down	-1.35921	-0.442767	1.35921	down	-1.67521	-0.744342	1.67521	down	-1.55578	-0.637635	1.55578	down		221188	Hs.187884	gb:BF057784 /DB_XREF=gi:10811680 /DB_XREF=7k53g09.x1 /CLONE=IMAGE:3479248 /FEA=EST /CNT=11 /TID=Hs.301930.0 /TIER=Stack /STK=8 /UG=Hs.301930 /UG_TITLE=ESTs
LDLRAP1	1.633e-08	2.29978e-10	-1.96997	-0.978172	1.96997	down	-1.8359	-0.876484	1.8359	down	-1.71094	-0.774789	1.71094	down	-1.94555	-0.960181	1.94555	down	-1.60355	-0.681268	1.60355	down	-2.59174	-1.37392	2.59174	down	-2.20117	-1.13827	2.20117	down		26119	Hs.590911	Cluster Incl. AA169780:zp21a04.s1 Homo sapiens cDNA, 3 end /clone=IMAGE-610062 /clone_end=3' /gb=AA169780 /gi=1748115 /ug=Hs.184482 /len=560
	1.642e-08	2.31547e-10	-1.17208	-0.229075	1.17208	down	-1.3377	-0.419751	1.3377	down	-1.26088	-0.334433	1.26088	down	-1.35439	-0.437643	1.35439	down	-1.37315	-0.457489	1.37315	down	-1.39742	-0.482763	1.39742	down	-1.50775	-0.592396	1.50775	down				gb:AA873827 /DB_XREF=gi:2968213 /DB_XREF=ob65b11.s1 /CLONE=IMAGE:1336221 /FEA=EST /CNT=8 /TID=Hs.181003.0 /TIER=ConsEnd /STK=6 /UG=Hs.181003 /UG_TITLE=ESTs
TRPS1	1.6429e-08	2.31974e-10	1.66708	0.73732	1.66708	up	1.80745	0.853952	1.80745	up	1.37718	0.461717	1.37718	up	1.58567	0.665097	1.58567	up	1.3275	0.408713	1.3275	up	1.69111	0.757972	1.69111	up	1.66587	0.736278	1.66587	up		7227	Hs.657018	gb:AK000948.1 /DB_XREF=gi:7021932 /FEA=mRNA /CNT=1 /TID=Hs.26102.2 /TIER=ConsEnd /STK=0 /UG=Hs.26102 /LL=7227 /UG_GENE=TRPS1 /UG_TITLE=trichorhinophalangeal syndrome I /DEF=Homo sapiens cDNA FLJ10086 fis, clone HEMBA1002177, weakly similar to TRANSCRIPTION FACTOR GATA-4.
FAM169A	1.64433e-08	2.32477e-10	-1.97804	-0.984069	1.97804	down	-1.97749	-0.98367	1.97749	down	-1.83212	-0.873518	1.83212	down	-2.30486	-1.20468	2.30486	down	-1.92901	-0.947861	1.92901	down	-2.54401	-1.3471	2.54401	down	-2.77465	-1.47231	2.77465	down		26049	Hs.91662	gb:AV720650 /DB_XREF=gi:10817802 /DB_XREF=AV720650 /CLONE=GLCGRF10 /FEA=EST /CNT=26 /TID=Hs.93828.0 /TIER=ConsEnd /STK=0 /UG=Hs.93828 /UG_TITLE=ESTs
ATP6V1C1	1.67332e-08	2.37187e-10	3.14308	1.65218	3.14308	up	1.7494	0.806863	1.7494	up	1.80713	0.853697	1.80713	up	2.51352	1.32971	2.51352	up	1.97216	0.979778	1.97216	up	3.11404	1.63879	3.11404	up	2.26771	1.18123	2.26771	up		528	Hs.86905	gb:AW024925 /DB_XREF=gi:5878455 /DB_XREF=wu92g09.x1 /CLONE=IMAGE:2527552 /FEA=FLmRNA /CNT=132 /TID=Hs.86905.0 /TIER=Stack /STK=26 /UG=Hs.86905 /LL=528 /UG_GENE=ATP6C /UG_TITLE=ATPase, H+ transporting, lysosomal (vacuolar proton pump) 42kD /FL=gb:NM_001695.1
PLK3	1.67332e-08	2.37125e-10	1.22355	0.291069	1.22355	up	1.08648	0.11966	1.08648	up	1.04192	0.0592496	1.04192	up	1.27731	0.353113	1.27731	up	1.14021	0.189298	1.14021	up	1.39856	0.483942	1.39856	up	1.36222	0.445957	1.36222	up		1263	Hs.632415	gb:NM_004073.1 /DB_XREF=gi:4758015 /GEN=CNK /FEA=FLmRNA /CNT=62 /TID=Hs.153640.0 /TIER=FL+Stack /STK=28 /UG=Hs.153640 /LL=1263 /DEF=Homo sapiens cytokine-inducible kinase (CNK), mRNA. /PROD=cytokine-inducible kinase /FL=gb:U56998.1 gb:NM_004073.1
PLIN3	1.68009e-08	2.38762e-10	2.00608	1.00438	2.00608	up	2.05644	1.04015	2.05644	up	1.65888	0.730213	1.65888	up	2.28718	1.19357	2.28718	up	1.83073	0.872422	1.83073	up	2.5805	1.36765	2.5805	up	2.92569	1.54878	2.92569	up		10226	Hs.140452	gb:NM_005817.1 /DB_XREF=gi:5032182 /GEN=TIP47 /FEA=FLmRNA /CNT=230 /TID=Hs.140452.0 /TIER=FL /STK=6 /UG=Hs.140452 /LL=10226 /DEF=Homo sapiens cargo selection protein (mannose 6 phosphate receptor binding protein) (TIP47), mRNA. /PROD=cargo selection protein (mannose 6 phosphatereceptor binding protein) /FL=gb:AF057140.1 gb:NM_005817.1 gb:AF051315.1 gb:AF051314.1 gb:AF055574.1
FTH1P5	1.68009e-08	2.38705e-10	1.0944	0.130142	1.0944	up	1.31696	0.397212	1.31696	up	1.35296	0.43612	1.35296	up	1.35027	0.433249	1.35027	up	1.43752	0.523586	1.43752	up	1.35985	0.44345	1.35985	up	1.48375	0.569253	1.48375	up		2509	Hs.453583	gb:J04755.1 /DB_XREF=gi:182512 /GEN=FTHP1 /FEA=FLmRNA /CNT=1 /TID=HsAffx.900375.592 /TIER=FL /STK=0 /DEF=Human ferritin H processed pseudogene, complete cds. /FL=gb:J04755.1
	1.68262e-08	2.39429e-10	-1.69109	-0.757955	1.69109	down	-1.70222	-0.767415	1.70222	down	-1.72059	-0.782906	1.72059	down	-2.1522	-1.10581	2.1522	down	-1.82566	-0.868421	1.82566	down	-2.12764	-1.08926	2.12764	down	-2.2219	-1.1518	2.2219	down			Hs.166348	gb:BC036488.1 /DB_XREF=gi:22209045 /TID=Hs2.166348.1 /CNT=41 /FEA=FLmRNA /TIER=FL /STK=7 /UG=Hs.166348 /DEF=Homo sapiens, clone MGC:43145 IMAGE:5261574, mRNA, complete cds. /PROD=Unknown (protein for MGC:43145) /FL=gb:BC036488.1
CEP57	1.69256e-08	2.41153e-10	-1.58846	-0.667632	1.58846	down	-2.18069	-1.12478	2.18069	down	-1.44527	-0.531341	1.44527	down	-1.90699	-0.931298	1.90699	down	-1.44591	-0.531978	1.44591	down	-1.98527	-0.989333	1.98527	down	-2.20311	-1.13954	2.20311	down		9702	Hs.101014	gb:AA918224 /DB_XREF=gi:3058114 /DB_XREF=on82h06.s1 /CLONE=IMAGE:1563227 /FEA=FLmRNA /CNT=108 /TID=Hs.151791.0 /TIER=Stack /STK=11 /UG=Hs.151791 /LL=9702 /UG_GENE=KIAA0092 /UG_TITLE=KIAA0092 gene product /FL=gb:NM_014679.1 gb:D42054.1
TRUB1	1.707e-08	2.43523e-10	-1.78011	-0.831964	1.78011	down	-2.41785	-1.27372	2.41785	down	-1.8602	-0.895461	1.8602	down	-2.31871	-1.21332	2.31871	down	-1.69355	-0.760051	1.69355	down	-2.235	-1.16027	2.235	down	-2.58178	-1.36837	2.58178	down		142940	Hs.21187	gb:AW500239 /DB_XREF=gi:7112666 /DB_XREF=UI-HF-BN0-akd-e-03-0-UI.r1 /CLONE=IMAGE:3076708 /FEA=mRNA /CNT=58 /TID=Hs.21187.0 /TIER=Stack /STK=38 /UG=Hs.21187 /UG_TITLE=Homo sapiens cDNA: FLJ23068 fis, clone LNG05562
LOC100996724///PDE4DIP	1.72539e-08	2.46462e-10	-1.44796	-0.534017	1.44796	down	-1.58513	-0.664598	1.58513	down	-1.40308	-0.488602	1.40308	down	-1.55854	-0.640199	1.55854	down	-1.32737	-0.408575	1.32737	down	-1.57524	-0.655568	1.57524	down	-1.5525	-0.634593	1.5525	down		9659///100996724	Hs.731111	gb:AB007923.1 /DB_XREF=gi:3413869 /GEN=KIAA0454 /FEA=mRNA /CNT=171 /TID=Hs.129928.1 /TIER=Stack /STK=61 /UG=Hs.129928 /LL=9659 /DEF=Homo sapiens mRNA for KIAA0454 protein, partial cds. /PROD=KIAA0454 protein
OGFRL1	1.74833e-08	2.50059e-10	-1.5755	-0.655807	1.5755	down	-1.83982	-0.879564	1.83982	down	-1.07988	-0.110875	1.07988	down	-1.55417	-0.636142	1.55417	down	-1.25017	-0.322124	1.25017	down	-2.3984	-1.26207	2.3984	down	-1.7908	-0.840603	1.7908	down		79627	Hs.648434	gb:BE500942 /DB_XREF=gi:9703350 /DB_XREF=7a33c06.x1 /CLONE=IMAGE:3220522 /FEA=mRNA /CNT=60 /TID=Hs.13299.0 /TIER=Stack /STK=22 /UG=Hs.13299 /UG_TITLE=Homo sapiens mRNA; cDNA DKFZp761M0111 (from clone DKFZp761M0111)
ZNF14	1.76347e-08	2.52547e-10	-1.63049	-0.705302	1.63049	down	-1.82216	-0.865651	1.82216	down	-1.70625	-0.770832	1.70625	down	-1.87328	-0.905564	1.87328	down	-1.56883	-0.64969	1.56883	down	-2.01841	-1.01322	2.01841	down	-2.21295	-1.14597	2.21295	down		7561	Hs.659932	gb:NM_021030.1 /DB_XREF=gi:11139306 /GEN=ZNF14 /FEA=FLmRNA /CNT=15 /TID=Hs.197219.0 /TIER=FL /STK=0 /UG=Hs.197219 /LL=7561 /DEF=Homo sapiens zinc finger protein 14 (KOX 6) (ZNF14), mRNA. /PROD=zinc finger protein 14 (KOX 6) /FL=gb:AB021644.1 gb:NM_021030.1
	1.76361e-08	2.52888e-10	-1.56483	-0.646006	1.56483	down	-1.22692	-0.295037	1.22692	down	-1.16148	-0.215958	1.16148	down	-1.85802	-0.893768	1.85802	down	-1.50461	-0.589393	1.50461	down	-2.16072	-1.11151	2.16072	down	-1.95762	-0.9691	1.95762	down			Hs.687009	gb:BC041991.1 /DB_XREF=gi:27469752 /TID=Hs2.434473.1 /CNT=1 /FEA=mRNA /TIER=ConsEnd /STK=1 /UG=Hs.434473 /UG_TITLE=Homo sapiens, clone IMAGE:5303966, mRNA /DEF=Homo sapiens, clone IMAGE:5303966, mRNA.
BMI1	1.78032e-08	2.55677e-10	-1.98134	-0.986477	1.98134	down	-2.38792	-1.25575	2.38792	down	-1.9935	-0.995303	1.9935	down	-2.52764	-1.33779	2.52764	down	-1.88908	-0.917687	1.88908	down	-2.71605	-1.44151	2.71605	down	-3.19027	-1.67368	3.19027	down		648	Hs.380403	gb:NM_005180.1 /DB_XREF=gi:4885094 /GEN=BMI1 /FEA=FLmRNA /CNT=143 /TID=Hs.431.0 /TIER=FL /STK=2 /UG=Hs.431 /LL=648 /DEF=Homo sapiens murine leukemia viral (bmi-1) oncogene homolog (BMI1), mRNA. /PROD=murine leukemia viral (bmi-1) oncogene homolog /FL=gb:NM_005180.1 gb:L13689.1
FYN	1.78032e-08	2.55936e-10	-2.08056	-1.05698	2.08056	down	-2.02299	-1.01649	2.02299	down	-2.12365	-1.08655	2.12365	down	-2.48791	-1.31494	2.48791	down	-1.85451	-0.891037	1.85451	down	-2.87476	-1.52344	2.87476	down	-3.02263	-1.59581	3.02263	down		2534	Hs.390567	gb:N20923 /DB_XREF=gi:1126093 /DB_XREF=yx53f09.s1 /CLONE=IMAGE:265481 /FEA=DNA_2 /CNT=130 /TID=Hs.169370.1 /TIER=Stack /STK=9 /UG=Hs.169370 /LL=2534 /UG_GENE=FYN /UG_TITLE=FYN oncogene related to SRC, FGR, YES
EXOSC4	1.79326e-08	2.58198e-10	1.26641	0.340748	1.26641	up	1.31547	0.395578	1.31547	up	1.01128	0.016184	1.01128	up	1.3762	0.460685	1.3762	up	1.20178	0.265178	1.20178	up	1.79262	0.842073	1.79262	up	1.69471	0.761042	1.69471	up		54512	Hs.632041	Cluster Incl. AI571298:tn44e03.x1 Homo sapiens cDNA, 3 end /clone=IMAGE-2170492 /clone_end=3' /gb=AI571298 /gi=4534672 /ug=Hs.97574 /len=537
ATP11B	1.79326e-08	2.58453e-10	2.97666	1.5737	2.97666	up	1.8792	0.910121	1.8792	up	1.55426	0.636225	1.55426	up	2.3004	1.20189	2.3004	up	1.62386	0.699431	1.62386	up	2.93392	1.55283	2.93392	up	2.22322	1.15265	2.22322	up		23200	Hs.478429	gb:BC033880.1 /DB_XREF=gi:21707507 /TID=Hs2.75478.1 /CNT=10 /FEA=FLmRNA /TIER=FL /STK=1 /LL=23200 /UG_GENE=ATP11B /UG=Hs.75478 /DEF=Homo sapiens, Similar to RIKEN cDNA 1110019I14 gene, clone MGC:46260 IMAGE:5548541, mRNA, complete cds. /PROD=Similar to RIKEN cDNA 1110019I14 gene /FL=gb:BC033880.1
TBC1D4	1.83424e-08	2.64694e-10	-2.54978	-1.35037	2.54978	down	-2.39198	-1.2582	2.39198	down	-1.91162	-0.934793	1.91162	down	-3.05487	-1.61111	3.05487	down	-2.07082	-1.0502	2.07082	down	-3.22865	-1.69093	3.22865	down	-3.12944	-1.6459	3.12944	down		9882	Hs.210891	gb:NM_014832.1 /DB_XREF=gi:7662197 /GEN=KIAA0603 /FEA=FLmRNA /CNT=110 /TID=Hs.173802.0 /TIER=FL /STK=5 /UG=Hs.173802 /LL=9882 /DEF=Homo sapiens KIAA0603 gene product (KIAA0603), mRNA. /PROD=KIAA0603 gene product /FL=gb:NM_014832.1 gb:AB011175.1
COLGALT1	1.84323e-08	2.66329e-10	1.6054	0.682929	1.6054	up	1.64762	0.720384	1.64762	up	1.50581	0.590544	1.50581	up	1.78622	0.836913	1.78622	up	1.30909	0.388565	1.30909	up	1.74108	0.799983	1.74108	up	1.84109	0.880563	1.84109	up		79709	Hs.418795	gb:NM_024656.1 /DB_XREF=gi:13375904 /GEN=FLJ22329 /FEA=FLmRNA /CNT=88 /TID=Hs.61478.0 /TIER=FL+Stack /STK=40 /UG=Hs.61478 /LL=79709 /DEF=Homo sapiens hypothetical protein FLJ22329 (FLJ22329), mRNA. /PROD=hypothetical protein FLJ22329 /FL=gb:NM_024656.1
SBNO2	1.849e-08	2.67501e-10	1.54479	0.627408	1.54479	up	1.43817	0.524229	1.43817	up	1.35579	0.439133	1.35579	up	1.93271	0.950623	1.93271	up	1.46168	0.547625	1.46168	up	1.81724	0.861752	1.81724	up	2.06839	1.04851	2.06839	up		22904	Hs.408708	gb:NM_014963.1 /DB_XREF=gi:7662409 /GEN=KIAA0963 /FEA=FLmRNA /CNT=79 /TID=Hs.7724.0 /TIER=FL+Stack /STK=38 /UG=Hs.7724 /LL=22904 /DEF=Homo sapiens KIAA0963 protein (KIAA0963), mRNA. /PROD=KIAA0963 protein /FL=gb:AB023180.1 gb:NM_014963.1
MCTP2	1.86333e-08	2.69915e-10	2.03514	1.02513	2.03514	up	1.73778	0.797244	1.73778	up	1.53042	0.613931	1.53042	up	1.89899	0.92523	1.89899	up	1.57301	0.653528	1.57301	up	2.10296	1.07242	2.10296	up	1.93069	0.949118	1.93069	up		55784	Hs.33368	gb:AK026984.1 /DB_XREF=gi:10439980 /FEA=mRNA /CNT=22 /TID=Hs.50742.0 /TIER=ConsEnd /STK=0 /UG=Hs.50742 /UG_TITLE=Homo sapiens cDNA: FLJ23331 fis, clone HEP12664 /DEF=Homo sapiens cDNA: FLJ23331 fis, clone HEP12664.
COLGALT1	1.87e-08	2.71222e-10	1.53529	0.618509	1.53529	up	1.3336	0.415331	1.3336	up	1.48401	0.569499	1.48401	up	1.82945	0.87141	1.82945	up	1.44212	0.528194	1.44212	up	1.715	0.778212	1.715	up	1.89642	0.923278	1.89642	up		79709	Hs.418795	gb:AI924150 /DB_XREF=gi:5660114 /DB_XREF=wn64c01.x1 /CLONE=IMAGE:2450208 /FEA=FLmRNA /CNT=88 /TID=Hs.61478.0 /TIER=Stack /STK=10 /UG=Hs.61478 /LL=79709 /UG_GENE=FLJ22329 /UG_TITLE=hypothetical protein FLJ22329 /FL=gb:NM_024656.1
TMEM106B	1.87281e-08	2.71973e-10	-1.96071	-0.97138	1.96071	down	-2.67001	-1.41685	2.67001	down	-2.07124	-1.0505	2.07124	down	-2.71452	-1.4407	2.71452	down	-1.98492	-0.989084	1.98492	down	-2.75958	-1.46445	2.75958	down	-2.95712	-1.56419	2.95712	down		54664	Hs.396358	gb:BF513060 /DB_XREF=gi:11598239 /DB_XREF=UI-H-BW1-amn-b-01-0-UI.s1 /CLONE=IMAGE:3070393 /FEA=EST /CNT=43 /TID=Hs.43558.0 /TIER=Stack /STK=22 /UG=Hs.43558 /UG_TITLE=ESTs
HPSE	1.88468e-08	2.74042e-10	2.39796	1.26181	2.39796	up	3.78622	1.92076	3.78622	up	4.04982	2.01786	4.04982	up	3.02933	1.599	3.02933	up	3.70926	1.89113	3.70926	up	3.11769	1.64048	3.11769	up	4.7224	2.23952	4.7224	up		10855	Hs.44227	gb:NM_006665.1 /DB_XREF=gi:5729872 /GEN=HPSE /FEA=FLmRNA /CNT=43 /TID=Hs.44227.0 /TIER=FL+Stack /STK=16 /UG=Hs.44227 /LL=10855 /DEF=Homo sapiens heparanase (HPSE), mRNA. /PROD=heparanase /FL=gb:AF152376.1 gb:AF165154.1 gb:AF155510.1 gb:AF084467.1 gb:NM_006665.1
KIF3A	1.9023e-08	2.76951e-10	-1.52992	-0.613457	1.52992	down	-1.64891	-0.721513	1.64891	down	-1.45657	-0.542573	1.45657	down	-1.79543	-0.844333	1.79543	down	-1.4456	-0.531665	1.4456	down	-1.69868	-0.764418	1.69868	down	-1.76656	-0.82094	1.76656	down		11127	Hs.43670	gb:AW340096 /DB_XREF=gi:6836722 /DB_XREF=hc93c03.x1 /CLONE=IMAGE:2907556 /FEA=EST /CNT=17 /TID=Hs.6529.0 /TIER=Stack /STK=15 /UG=Hs.6529 /UG_TITLE=ESTs
LIMK2	1.91749e-08	2.79513e-10	3.37169	1.75347	3.37169	up	2.24829	1.16883	2.24829	up	2.11192	1.07855	2.11192	up	3.36933	1.75246	3.36933	up	2.29922	1.20115	2.29922	up	3.41698	1.77272	3.41698	up	3.19638	1.67644	3.19638	up		3985	Hs.474596	gb:NM_005569.2 /DB_XREF=gi:8051619 /GEN=LIMK2 /FEA=FLmRNA /CNT=164 /TID=Hs.278027.0 /TIER=FL+Stack /STK=61 /UG=Hs.278027 /LL=3985 /DEF=Homo sapiens LIM domain kinase 2 (LIMK2), transcript variant 2a, mRNA. /PROD=LIM domain kinase 2 isoform 2a /FL=gb:D45906.1 gb:NM_005569.2
RHOG	1.92692e-08	2.81334e-10	1.68093	0.749259	1.68093	up	1.55311	0.63516	1.55311	up	1.38594	0.470862	1.38594	up	1.91526	0.93754	1.91526	up	1.5937	0.672383	1.5937	up	1.98524	0.989314	1.98524	up	2.12717	1.08894	2.12717	up		391	Hs.501728	gb:NM_001665.1 /DB_XREF=gi:4502218 /GEN=ARHG /FEA=FLmRNA /CNT=103 /TID=Hs.75082.0 /TIER=FL+Stack /STK=42 /UG=Hs.75082 /LL=391 /DEF=Homo sapiens ras homolog gene family, member G (rho G) (ARHG), mRNA. /PROD=ras homolog gene family, member G (rho G) /FL=gb:NM_001665.1
SAMD3	1.92692e-08	2.81946e-10	-3.54365	-1.82524	3.54365	down	-3.64098	-1.86433	3.64098	down	-3.1531	-1.65677	3.1531	down	-4.08411	-2.03002	4.08411	down	-2.56121	-1.35683	2.56121	down	-4.26996	-2.09422	4.26996	down	-4.15421	-2.05457	4.15421	down		154075	Hs.440508	gb:AI129628 /DB_XREF=gi:3598142 /DB_XREF=qc49a07.x1 /CLONE=IMAGE:1712916 /FEA=EST /CNT=6 /TID=Hs.130304.0 /TIER=ConsEnd /STK=5 /UG=Hs.130304 /UG_TITLE=ESTs
WDFY3	1.92692e-08	2.81774e-10	1.83	0.871843	1.83	up	1.69134	0.758169	1.69134	up	1.5532	0.635246	1.5532	up	1.69207	0.758791	1.69207	up	1.26038	0.333863	1.26038	up	1.8201	0.864014	1.8201	up	1.57401	0.654441	1.57401	up		23001		gb:AI732512 /DB_XREF=gi:5053625 /DB_XREF=ni79b12.x5 /CLONE=IMAGE:983039 /FEA=EST /CNT=10 /TID=Hs.181693.0 /TIER=ConsEnd /STK=0 /UG=Hs.181693 /UG_TITLE=ESTs
ZNF106	1.94571e-08	2.8505e-10	1.76008	0.815645	1.76008	up	2.18724	1.12911	2.18724	up	1.84403	0.882859	1.84403	up	2.26442	1.17914	2.26442	up	1.75571	0.812053	1.75571	up	1.98336	0.98795	1.98336	up	2.29706	1.19979	2.29706	up		64397	Hs.511143	gb:AI493587 /DB_XREF=gi:4394590 /DB_XREF=th39b07.x1 /CLONE=IMAGE:2120629 /FEA=FLmRNA /CNT=318 /TID=Hs.15220.0 /TIER=Stack /STK=9 /UG=Hs.15220 /LL=64397 /UG_GENE=ZFP106 /UG_TITLE=zinc finger protein 106 /FL=gb:AF205632.1 gb:NM_022473.1
ZNF548	1.95943e-08	2.87419e-10	-1.66108	-0.732119	1.66108	down	-2.04657	-1.03321	2.04657	down	-1.61385	-0.69051	1.61385	down	-1.95355	-0.966098	1.95355	down	-1.65466	-0.726534	1.65466	down	-2.07533	-1.05334	2.07533	down	-2.11329	-1.07949	2.11329	down		147694	Hs.126905	gb:NM_152909.1 /DB_XREF=gi:23097267 /TID=Hs2.374782.1 /CNT=21 /FEA=FLmRNA /TIER=FL /STK=0 /LL=147694 /UG_GENE=FLJ32932 /UG=Hs.374782 /UG_TITLE=hypothetical protein FLJ32932 /DEF=Homo sapiens hypothetical protein FLJ32932 (FLJ32932), mRNA. /FL=gb:BC030788.1 gb:NM_152909.1
LOC105377782///LOC286087	1.97392e-08	2.89905e-10	-1.57606	-0.656324	1.57606	down	-1.7511	-0.808262	1.7511	down	-1.61106	-0.688006	1.61106	down	-1.6424	-0.715805	1.6424	down	-1.66023	-0.731381	1.66023	down	-1.65635	-0.728007	1.65635	down	-1.67231	-0.741839	1.67231	down		286087///105377782	Hs.202475	gb:AI033510 /DB_XREF=gi:3254463 /DB_XREF=ox06e07.s1 /CLONE=IMAGE:1655556 /TID=Hs2.202475.1 /CNT=5 /FEA=mRNA /TIER=ConsEnd /STK=2 /UG=Hs.202475 /UG_TITLE=Homo sapiens cDNA FLJ34356 fis, clone FEBRA2012195.
PCM1	1.98027e-08	2.912e-10	-1.69367	-0.760151	1.69367	down	-1.7443	-0.802651	1.7443	down	-1.48805	-0.573424	1.48805	down	-1.76259	-0.8177	1.76259	down	-1.51946	-0.603561	1.51946	down	-1.9228	-0.943207	1.9228	down	-1.87232	-0.904824	1.87232	down		5108	Hs.491148	gb:BE672700 /DB_XREF=gi:10033241 /DB_XREF=7b71g04.x1 /CLONE=IMAGE:3233718 /FEA=EST /CNT=16 /TID=Hs.155272.0 /TIER=Stack /STK=10 /UG=Hs.155272 /UG_TITLE=ESTs
MKNK1	1.98114e-08	2.92053e-10	2.53458	1.34175	2.53458	up	1.82485	0.867781	1.82485	up	1.89283	0.920548	1.89283	up	2.43451	1.28363	2.43451	up	1.92074	0.941664	1.92074	up	2.40544	1.2663	2.40544	up	2.44279	1.28853	2.44279	up		8569	Hs.371594	gb:BC002755.1 /DB_XREF=gi:12803828 /FEA=FLmRNA /CNT=95 /TID=Hs.5591.1 /TIER=FL /STK=0 /UG=Hs.5591 /LL=8569 /UG_GENE=MKNK1 /DEF=Homo sapiens, Similar to MAP kinase-interacting serinethreonine kinase 1, clone MGC:3690, mRNA, complete cds. /PROD=Similar to MAP kinase-interactingserinethreonine kinase 1 /FL=gb:BC002755.1
LILRA5	1.98114e-08	2.92002e-10	3.72861	1.89864	3.72861	up	5.12144	2.35655	5.12144	up	3.56738	1.83486	3.56738	up	5.2799	2.40051	5.2799	up	2.93877	1.55521	2.93877	up	6.24402	2.64247	6.24402	up	5.85795	2.5504	5.85795	up		353514	Hs.710986	gb:AF499918.1 /DB_XREF=gi:23334581 /GEN=LIR9s1 /TID=Hs2.113277.6 /CNT=1 /FEA=FLmRNA /TIER=FL /STK=1 /LL=11026 /UG=Hs.113277 /DEF=Homo sapiens leukocyte Ig-like receptor 9s1 (LIR9s1) mRNA, complete cds. /PROD=leukocyte Ig-like receptor 9s1 /FL=gb:AF499918.1
SMURF2	2.05838e-08	3.03816e-10	-1.4057	-0.49129	1.4057	down	-1.91821	-0.939764	1.91821	down	-1.61195	-0.688803	1.61195	down	-1.76211	-0.817305	1.76211	down	-1.54327	-0.625987	1.54327	down	-2.04275	-1.03051	2.04275	down	-2.00772	-1.00556	2.00772	down		64750		gb:BE962027 /DB_XREF=gi:11764511 /DB_XREF=601655271R1 /CLONE=IMAGE:3845969 /FEA=EST /CNT=39 /TID=Hs.169872.0 /TIER=Stack /STK=26 /UG=Hs.169872 /UG_TITLE=ESTs
[truncated: 12,015 more rows]

## Sheet: Table S8.2
Gene Symbol	Distance-Based Similarity	[Control Day 1](normalized)	[SIRS Day 1](normalized)	[SIRS Day 3](normalized)	[SIRS Resolved Day 3](normalized)	[Sepsis Day 1](normalized)	[Sepsis Day 3](normalized)	[Septic Shock Day 1](normalized)	[Septic Shock Day 3](normalized)	Entrez Gene	UniGene ID	Target Description
[truncated: 2 more rows]

[truncated: 7 more sheets: Table S8.3, Table S8.4, Table S8.5, Table S8.6, Table S8.7, Table S8.8, Table S8.9]
