# Supplementary material for: Development of a Bioinformatics Framework for Identification and Validation of Genomic Biomarkers and Key Immunopathology Processes and Controllers in Infectious and Non-infectious Severe Inflammatory Response Syndrome
Source: Front Immunol. 2020 Mar 31;11:380. doi: 10.3389/fimmu.2020.00380 (PMC7147506; doi:10.3389/fimmu.2020.00380)
Supplement: Supplementary Information S9 — Table S9.1: ANOVA results for dataset E-GEO 9960, ranked on significance (p-value from lowest to highest). Table S9.2: Results of similar entities analysis for CD177 using dataset E-GEO 9960. Table S9.3: Results of similar entities analysis for FGF13 using dataset E-GEO 9960. Table S9.4: Results of similar entities analysis for GPR84 using dataset E-GEO 9960. Table S9.5: Results of similar entities analysis for KLRK1 using dataset E-GEO 9960. Table S9.6: Results of similar entities analysis for MYL9 using dataset E-GEO 9960. Table S9.7: Results of similar entities analysis for PCOLCE2 using dataset E-GEO 9960. Table S9.8: Results of similar entities analysis for SLC16A3 using dataset E-GEO 9960. Table S9.9: Results of similar entities analysis for TDRD9 using dataset E-GEO 9960. [file Table_9.xlsx]

## Sheet: Table S9.1
Gene Symbol	Probe Set ID	p	FC ([Sepsis] vs [Control])	Log FC ([Sepsis] vs [Control])	FC (abs) ([Sepsis] vs [Control])	Regulation ([Sepsis] vs [Control])	FC ([Sepsis gram-negative] vs [Control])	Log FC ([Sepsis gram-negative] vs [Control])	FC (abs) ([Sepsis gram-negative] vs [Control])	Regulation ([Sepsis gram-negative] vs [Control])	FC ([Sepsis gram-positive] vs [Control])	Log FC ([Sepsis gram-positive] vs [Control])	FC (abs) ([Sepsis gram-positive] vs [Control])	Regulation ([Sepsis gram-positive] vs [Control])	FC ([Sepsis mixed infection] vs [Control])	Log FC ([Sepsis mixed infection] vs [Control])	FC (abs) ([Sepsis mixed infection] vs [Control])	Regulation ([Sepsis mixed infection] vs [Control])	[Control](normalized)	[Sepsis](normalized)	[Sepsis gram-negative](normalized)	[Sepsis gram-positive](normalized)	[Sepsis mixed infection](normalized)	Entrez Gene	UniGene ID	Target Description
POLH	219380_x_at	9.94579e-07	-1.14904	-0.200434	1.14904	down	-1.19004	-0.251007	1.19004	down	-1.28431	-0.360998	1.28431	down	-1.31898	-0.399422	1.31898	down	0.26418	0.0637453	0.0131723	-0.0968187	-0.135243	5429	Hs.655467	gb:NM_006502.1 /DB_XREF=gi:5729981 /GEN=POLH /FEA=FLmRNA /CNT=45 /TID=Hs.155573.0 /TIER=FL /STK=0 /UG=Hs.155573 /LL=5429 /DEF=Homo sapiens polymerase (DNA directed), eta (POLH), mRNA. /PROD=polymerase (DNA directed), eta /FL=gb:AB024313.1 gb:AF158185.1 gb:NM_006502.1
LINC01578	225951_s_at	1.84222e-05	-1.06605	-0.0922792	1.06605	down	-1.22201	-0.28926	1.22201	down	-1.12412	-0.168792	1.12412	down	-1.27695	-0.352704	1.27695	down	0.174012	0.0817332	-0.115247	0.00522036	-0.178692	100507217	Hs.622504	gb:AV756026 /DB_XREF=gi:10913874 /DB_XREF=AV756026 /CLONE=BMFAVD02 /FEA=mRNA /CNT=60 /TID=Hs.287864.2 /TIER=Stack /STK=19 /UG=Hs.287864 /UG_TITLE=Homo sapiens cDNA FLJ14030 fis, clone HEMBA1004086
DST	1553191_at	2.53699e-05	-1.07176	-0.0999803	1.07176	down	1.05963	0.0835636	1.05963	up	1.04846	0.0682703	1.04846	up	1.09911	0.136331	1.09911	up	-0.0284623	-0.128443	0.0551012	0.039808	0.107869	667		gb:NM_020388.2 /DB_XREF=gi:20357503 /GEN=BPAG1 /TID=Hs2.198689.2 /CNT=18 /FEA=FLmRNA /TIER=FL /STK=1 /LL=667 /UG=Hs.198689 /DEF=Homo sapiens bullous pemphigoid antigen 1, 230240kDa (BPAG1), transcript variant 1eB, mRNA. /PROD=bullous pemphigoid antigen 1 isoform 1eBprecursor /FL=gb:NM_020388.2
FERMT1	232479_at	2.67052e-05	1.1442	0.194339	1.1442	up	1.2118	0.277149	1.2118	up	1.14012	0.189185	1.14012	up	1.18286	0.242282	1.18286	up	-0.190959	0.0033804	0.0861903	-0.00177327	0.0513231	55612		gb:AK025365.1 /DB_XREF=gi:10437867 /FEA=mRNA /CNT=7 /TID=Hs.288129.0 /TIER=ConsEnd /STK=0 /UG=Hs.288129 /UG_TITLE=Homo sapiens cDNA: FLJ21712 fis, clone COL10231 /DEF=Homo sapiens cDNA: FLJ21712 fis, clone COL10231.
LINC01242	1561414_at	3.94835e-05	-1.0429	-0.0605985	1.0429	down	1.11305	0.154513	1.11305	up	1.00642	0.00922609	1.00642	up	-1.00551	-0.00792367	1.00551	down	-0.00967825	-0.0702768	0.144835	-0.000452154	-0.0176019	401497	Hs.680131	gb:BC022036.1 /DB_XREF=gi:18314444 /TID=Hs2.352178.1 /CNT=2 /FEA=mRNA /TIER=ConsEnd /STK=1 /UG=Hs.352178 /UG_TITLE=Homo sapiens, clone IMAGE:4826624, mRNA /DEF=Homo sapiens, clone IMAGE:4826624, mRNA.
	230952_at	5.71204e-05	-1.2994	-0.37785	1.2994	down	-1.3242	-0.405126	1.3242	down	-1.3025	-0.381281	1.3025	down	-1.44721	-0.533273	1.44721	down	0.374956	-0.00289371	-0.0301697	-0.0063248	-0.158317			gb:AW299630 /DB_XREF=gi:6709307 /DB_XREF=xs52f11.x1 /CLONE=IMAGE:2773293 /FEA=EST /CNT=8 /TID=Hs.128894.0 /TIER=Stack /STK=8 /UG=Hs.128894 /UG_TITLE=ESTs
PELP1	215354_s_at	6.67965e-05	-1.16039	-0.214604	1.16039	down	-1.23118	-0.300036	1.23118	down	-1.28186	-0.358241	1.28186	down	-1.27451	-0.34994	1.27451	down	0.293123	0.078519	-0.00691305	-0.065118	-0.0568167	27043	Hs.744899	gb:BC002875.1 /DB_XREF=gi:12804044 /FEA=mRNA /CNT=4 /TID=Hs.274149.1 /TIER=ConsEnd /STK=0 /UG=Hs.274149 /LL=27043 /UG_GENE=P160 /DEF=Homo sapiens, clone IMAGE:3940843, mRNA, partial cds. /PROD=Unknown (protein for IMAGE:3940843)
SARM1	213257_at	7.9661e-05	-1.15897	-0.212843	1.15897	down	-1.24941	-0.321244	1.24941	down	-1.13632	-0.184374	1.13632	down	-1.23046	-0.299194	1.23046	down	0.224164	0.0113206	-0.09708	0.0397896	-0.0750303	23098	Hs.743510	gb:AJ290445.1 /DB_XREF=gi:7711001 /GEN=KIAA0524SARM /FEA=mRNA /CNT=52 /TID=Hs.128759.0 /TIER=Stack /STK=9 /UG=Hs.128759 /LL=23098 /DEF=Homo sapiens mRNA for KIAA0524SARM protein. /PROD=KIAA0524SARM protein
	232653_at	9.94417e-05	1.21844	0.28503	1.21844	up	1.99197	0.994196	1.99197	up	1.41733	0.503172	1.41733	up	1.11111	0.152004	1.11111	up	-0.405002	-0.119972	0.589193	0.0981703	-0.252998		Hs.688352	gb:AW265514 /DB_XREF=gi:6642330 /DB_XREF=xq70g01.x1 /CLONE=IMAGE:2756016 /FEA=mRNA /CNT=6 /TID=Hs.278004.0 /TIER=ConsEnd /STK=1 /UG=Hs.278004 /UG_TITLE=Homo sapiens cDNA FLJ14044 fis, clone HEMBA1006124
JADE2	232279_at	0.000118879	-1.164	-0.219091	1.164	down	-1.3828	-0.467596	1.3828	down	-1.24468	-0.315779	1.24468	down	-1.22269	-0.290059	1.22269	down	0.302453	0.0833614	-0.165143	-0.0133266	0.0123936	23338	Hs.732155	gb:AK025001.1 /DB_XREF=gi:10437434 /FEA=mRNA /CNT=9 /TID=Hs.136729.0 /TIER=ConsEnd /STK=3 /UG=Hs.136729 /UG_TITLE=Homo sapiens cDNA: FLJ21348 fis, clone COL02733 /DEF=Homo sapiens cDNA: FLJ21348 fis, clone COL02733.
RAMP2-AS1	232731_x_at	0.000119114	-1.11915	-0.162409	1.11915	down	-1.11744	-0.160197	1.11744	down	-1.24563	-0.316874	1.24563	down	-1.6347	-0.709024	1.6347	down	0.214737	0.0523277	0.0545398	-0.102137	-0.494287	100190938	Hs.655265	gb:BC001607.1 /DB_XREF=gi:12804410 /FEA=mRNA /CNT=7 /TID=Hs.322444.0 /TIER=ConsEnd /STK=0 /UG=Hs.322444 /DEF=Homo sapiens, clone IMAGE:3543874, mRNA, partial cds. /PROD=Unknown (protein for IMAGE:3543874)
NPC1	238568_s_at	0.000123131	-1.09451	-0.13029	1.09451	down	-1.16984	-0.226314	1.16984	down	-1.25674	-0.329688	1.25674	down	-1.22055	-0.287529	1.22055	down	0.191649	0.0613588	-0.0346654	-0.138039	-0.09588	4864		gb:BE742377 /DB_XREF=gi:10156369 /DB_XREF=601575919F1 /CLONE=IMAGE:3836909 /FEA=EST /CNT=8 /TID=Hs.148910.0 /TIER=ConsEnd /STK=0 /UG=Hs.148910 /UG_TITLE=ESTs
	241567_at	0.000131361	1.00542	0.00780523	1.00542	up	1.09214	0.127153	1.09214	up	1.02336	0.0333099	1.02336	up	1.04412	0.0622907	1.04412	up	-0.0530419	-0.0452367	0.0741111	-0.019732	0.00924878			gb:BE348448 /DB_XREF=gi:9260301 /DB_XREF=hw17h11.x1 /CLONE=IMAGE:3183237 /FEA=EST /CNT=4 /TID=Hs.283192.0 /TIER=ConsEnd /STK=4 /UG=Hs.283192 /UG_TITLE=ESTs
SIK3	204155_s_at	0.000161009	-1.2022	-0.265672	1.2022	down	-1.31781	-0.398145	1.31781	down	-1.25687	-0.329841	1.25687	down	-1.35375	-0.43696	1.35375	down	0.291209	0.0255368	-0.106936	-0.0386323	-0.145751	23387	Hs.167451	gb:AA044154 /DB_XREF=gi:1522030 /DB_XREF=zk50b06.r1 /CLONE=IMAGE:486227 /FEA=FLmRNA /CNT=104 /TID=Hs.4278.0 /TIER=ConsEnd /STK=0 /UG=Hs.4278 /LL=23387 /UG_GENE=KIAA0999 /UG_TITLE=KIAA0999 protein /FL=gb:NM_025164.1
ZNF500	213641_at	0.000174309	-1.21521	-0.2812	1.21521	down	-1.31823	-0.3986	1.31823	down	-1.23807	-0.30809	1.23807	down	-1.23968	-0.309971	1.23968	down	0.264304	-0.0168956	-0.134296	-0.0437858	-0.045667	26048	Hs.513316	gb:AB011129.1 /DB_XREF=gi:3043637 /GEN=KIAA0557 /FEA=mRNA /CNT=40 /TID=Hs.101414.1 /TIER=ConsEnd /STK=0 /UG=Hs.101414 /LL=26048 /DEF=Homo sapiens mRNA for KIAA0557 protein, partial cds. /PROD=KIAA0557 protein
CIB4	236378_at	0.00019614	1.101	0.138816	1.101	up	1.01448	0.02074	1.01448	up	1.11452	0.156424	1.11452	up	1.07351	0.102337	1.07351	up	-0.0695633	0.0692526	-0.0488233	0.0868609	0.0327735	130106	Hs.591579	gb:BF681360 /DB_XREF=gi:11955255 /DB_XREF=602156549F1 /CLONE=IMAGE:4297261 /FEA=EST /CNT=7 /TID=Hs.231898.0 /TIER=ConsEnd /STK=5 /UG=Hs.231898 /UG_TITLE=ESTs, Weakly similar to A Chain A, Homology-Based Model Of Calcium-Saturated Cib (H.sapiens)
RHOBTB2	209441_at	0.00019706	-1.17654	-0.234549	1.17654	down	-1.11081	-0.151613	1.11081	down	-1.16954	-0.225943	1.16954	down	-1.24239	-0.313113	1.24239	down	0.166416	-0.068133	0.014803	-0.0595274	-0.146697	23221	Hs.372688	gb:AY009093.1 /DB_XREF=gi:12667515 /GEN=DBC2 /FEA=FLmRNA /CNT=91 /TID=Hs.62113.0 /TIER=FL+Stack /STK=27 /UG=Hs.62113 /LL=23221 /DEF=Homo sapiens DBC2 (DBC2) mRNA, complete cds. /PROD=DBC2 /FL=gb:AY009093.1
ZNF547	1558995_at	0.000209358	1.06959	0.0970575	1.06959	up	1.19764	0.260193	1.19764	up	1.12328	0.167717	1.12328	up	1.03324	0.0471813	1.03324	up	-0.0938456	0.00321187	0.166348	0.0738716	-0.0466643	284306	Hs.446620	gb:BC042681.1 /DB_XREF=gi:27503766 /TID=Hs2.170990.2 /CNT=9 /FEA=mRNA /TIER=ConsEnd /STK=0 /LL=284306 /UG_GENE=FLJ31100 /UG=Hs.170990 /UG_TITLE=hypothetical protein FLJ31100 /DEF=Homo sapiens, Similar to hypothetical protein FLJ32932, clone IMAGE:4823926, mRNA, partial cds.
PINX1	223907_s_at	0.000243957	-1.28064	-0.356862	1.28064	down	-1.33023	-0.41168	1.33023	down	-1.26149	-0.335132	1.26149	down	-1.26235	-0.336117	1.26235	down	0.280541	-0.0763209	-0.131139	-0.054591	-0.0555758	54984	Hs.490991	gb:AF205718.1 /DB_XREF=gi:10504237 /GEN=LPTS /FEA=FLmRNA /CNT=7 /TID=Hs.99829.0 /TIER=FL /STK=1 /UG=Hs.99829 /LL=54984 /DEF=Homo sapiens hepatocellular carcinoma-related putative tumor suppressor (LPTS) mRNA, complete cds. /PROD=hepatocellular carcinoma-related putative tumorsuppressor /FL=gb:AF205718.1
	1563023_at	0.000332087	1.04516	0.0637173	1.04516	up	1.05543	0.0778245	1.05543	up	1.04807	0.0677373	1.04807	up	1.18351	0.243066	1.18351	up	-0.0685846	-0.00486726	0.00923992	-0.000847283	0.174482		Hs.683436	gb:BC029448.1 /DB_XREF=gi:20809541 /TID=Hs2.374730.1 /CNT=2 /FEA=mRNA /TIER=ConsEnd /STK=0 /UG=Hs.374730 /UG_TITLE=Homo sapiens, clone IMAGE:4716715, mRNA /DEF=Homo sapiens, clone IMAGE:4716715, mRNA.
	233282_at	0.00033266	-1.01601	-0.0229108	1.01601	down	1.10444	0.143312	1.10444	up	1.08648	0.119666	1.08648	up	1.07279	0.101372	1.07279	up	-0.0699031	-0.0928139	0.073409	0.0497625	0.031469		Hs.677188	gb:AK023395.1 /DB_XREF=gi:10435314 /FEA=mRNA /CNT=3 /TID=Hs.296735.0 /TIER=ConsEnd /STK=0 /UG=Hs.296735 /UG_TITLE=Homo sapiens cDNA FLJ13333 fis, clone OVARC1001828 /DEF=Homo sapiens cDNA FLJ13333 fis, clone OVARC1001828.
POU6F1	205878_at	0.000349905	-1.37126	-0.4555	1.37126	down	-1.38389	-0.468731	1.38389	down	-1.32964	-0.411038	1.32964	down	-1.44909	-0.535143	1.44909	down	0.425957	-0.0295428	-0.0427739	0.014919	-0.109186	5463	Hs.555886	gb:NM_002702.1 /DB_XREF=gi:4505968 /GEN=POU6F1 /FEA=FLmRNA /CNT=30 /TID=Hs.2815.0 /TIER=FL+Stack /STK=18 /UG=Hs.2815 /LL=5463 /DEF=Homo sapiens POU domain, class 6, transcription factor 1 (POU6F1), mRNA. /PROD=POU domain, class 6, transcription factor 1 /FL=gb:NM_002702.1
	222213_x_at	0.000380366	1.08573	0.118663	1.08573	up	1.06422	0.0898018	1.06422	up	1.08621	0.119298	1.08621	up	1.23318	0.30238	1.23318	up	-0.0903455	0.0283177	-0.0005437	0.0289529	0.212035			gb:AU147800 /DB_XREF=gi:11009321 /DB_XREF=AU147800 /CLONE=MAMMA1001745 /FEA=mRNA /CNT=2 /TID=Hs.296710.0 /TIER=ConsEnd /STK=1 /UG=Hs.296710 /UG_TITLE=Homo sapiens cDNA FLJ12281 fis, clone MAMMA1001745
TCOF1	202385_s_at	0.00042297	-1.1604	-0.214628	1.1604	down	-1.38267	-0.467452	1.38267	down	-1.39458	-0.479834	1.39458	down	-1.3388	-0.420939	1.3388	down	0.296797	0.0821689	-0.170655	-0.183037	-0.124142	6949	Hs.519672	gb:NM_000356.1 /DB_XREF=gi:4507410 /GEN=TCOF1 /FEA=FLmRNA /CNT=148 /TID=Hs.301266.0 /TIER=FL+Stack /STK=11 /UG=Hs.301266 /LL=6949 /DEF=Homo sapiens Treacher Collins-Franceschetti syndrome 1 (TCOF1), mRNA. /PROD=treacle /FL=gb:U40847.1 gb:U76366.1 gb:NM_000356.1
LOC105379878	237110_at	0.000426476	-1.38489	-0.46977	1.38489	down	-1.25314	-0.325544	1.25314	down	-1.215	-0.280958	1.215	down	-1.133	-0.180152	1.133	down	0.283978	-0.185793	-0.0415661	0.00301978	0.103826	105379878		gb:BF445178 /DB_XREF=gi:11510239 /DB_XREF=nad21f05.x1 /CLONE=IMAGE:3366273 /FEA=EST /CNT=6 /TID=Hs.49409.0 /TIER=ConsEnd /STK=6 /UG=Hs.49409 /UG_TITLE=ESTs
LINC00884	1566761_a_at	0.000447352	1.17503	0.232701	1.17503	up	1.10905	0.149323	1.10905	up	1.29866	0.377022	1.29866	up	1.24951	0.321362	1.24951	up	-0.161767	0.070934	-0.0124442	0.215255	0.159594	401106	Hs.407087///Hs.638278	gb:AK094122.1 /DB_XREF=gi:21753120 /TID=Hs2.246862.2 /CNT=1 /FEA=mRNA /TIER=ConsEnd /STK=0 /UG=Hs.246862 /UG_TITLE=Homo sapiens cDNA FLJ36803 fis, clone ADRGL2008966. /DEF=Homo sapiens cDNA FLJ36803 fis, clone ADRGL2008966.
	215475_at	0.00047396	1.04811	0.0677861	1.04811	up	1.12789	0.173624	1.12789	up	1.05682	0.0797351	1.05682	up	1.12857	0.174498	1.12857	up	-0.0928275	-0.0250414	0.0807962	-0.0130925	0.0816702		Hs.735208	gb:AK022094.1 /DB_XREF=gi:10433415 /FEA=mRNA /CNT=3 /TID=Hs.151194.0 /TIER=ConsEnd /STK=0 /UG=Hs.151194 /UG_TITLE=Homo sapiens cDNA FLJ12032 fis, clone HEMBB1001880 /DEF=Homo sapiens cDNA FLJ12032 fis, clone HEMBB1001880.
SPOCK2	202523_s_at	0.000481672	-1.27592	-0.351542	1.27592	down	-1.32448	-0.405421	1.32448	down	-1.27925	-0.3553	1.27925	down	-1.24473	-0.315838	1.24473	down	0.270681	-0.0808608	-0.134739	-0.0846182	-0.0451563	9806	Hs.523009	gb:AI952009 /DB_XREF=gi:5744319 /DB_XREF=wx40f07.x1 /CLONE=IMAGE:2546149 /FEA=FLmRNA /CNT=186 /TID=Hs.74583.0 /TIER=Stack /STK=10 /UG=Hs.74583 /LL=9806 /UG_GENE=KIAA0275 /UG_TITLE=KIAA0275 gene product /FL=gb:NM_014767.1 gb:D87465.1
TRIM73///TRIM74	1554182_at	0.000502493	-1.16299	-0.217836	1.16299	down	-1.17028	-0.226859	1.17028	down	-1.17357	-0.230907	1.17357	down	-1.22486	-0.292618	1.22486	down	0.202433	-0.0154023	-0.0244262	-0.0284737	-0.0901846	375593///378108	Hs.632307///Hs.645328	gb:BC033871.1 /DB_XREF=gi:21707221 /TID=Hs2.375079.1 /CNT=10 /FEA=FLmRNA /TIER=FL /STK=3 /UG=Hs.375079 /DEF=Homo sapiens, Similar to hypothetical gene supported by AK057366, clone MGC:45440 IMAGE:5201777, mRNA, complete cds. /PROD=Similar to hypothetical gene supported byAK057366 /FL=gb:BC033871.1
TELO2	34260_at	0.000504167	-1.10941	-0.149791	1.10941	down	-1.12038	-0.163984	1.12038	down	-1.22256	-0.28991	1.22256	down	-1.27099	-0.345952	1.27099	down	0.209508	0.0597169	0.0455245	-0.0804015	-0.136443	9894	Hs.271044	Cluster Incl. AB014583:Homo sapiens mRNA for KIAA0683 protein, complete cds /cds=(276,2030) /gb=AB014583 /gi=3327179 /ug=Hs.226275 /len=4337
CLDN1	222549_at	0.000525505	1.0714	0.0994984	1.0714	up	1.07449	0.103655	1.07449	up	1.13974	0.18871	1.13974	up	1.1693	0.22565	1.1693	up	-0.104897	-0.00539835	-0.00124182	0.0838129	0.120753	9076	Hs.439060	gb:AF101051.1 /DB_XREF=gi:4323580 /GEN=SEMP1 /FEA=FLmRNA /CNT=202 /TID=Hs.7327.0 /TIER=FL+Stack /STK=55 /UG=Hs.7327 /LL=9076 /DEF=Homo sapiens senescence-associated epithelial membrane protein (SEMP1) mRNA, complete cds. /PROD=senescence-associated epithelial membraneprotein /FL=gb:AF115546.1 gb:AF101051.1 gb:NM_021101.1 gb:AF134160.1
VAMP2	201557_at	0.00054269	-1.19408	-0.255894	1.19408	down	-1.3228	-0.403591	1.3228	down	-1.25393	-0.326459	1.25393	down	-1.45126	-0.537309	1.45126	down	0.330844	0.0749495	-0.0727473	0.00438525	-0.206466	6844	Hs.25348	gb:NM_014232.1 /DB_XREF=gi:7657674 /GEN=VAMP2 /FEA=FLmRNA /CNT=254 /TID=Hs.194534.0 /TIER=FL+Stack /STK=85 /UG=Hs.194534 /LL=6844 /DEF=Homo sapiens vesicle-associated membrane protein 2 (synaptobrevin 2) (VAMP2), mRNA. /PROD=vesicle-associated membrane protein 2(synaptobrevin 2) /FL=gb:BC002737.1 gb:NM_014232.1
SOSTDC1	213456_at	0.000557741	-1.00598	-0.00859644	1.00598	down	-1.04888	-0.0688521	1.04888	down	1.0991	0.136323	1.0991	up	1.0907	0.125253	1.0907	up	-0.00917917	-0.0177756	-0.0780313	0.127144	0.116074	25928	Hs.648106	gb:AI927000 /DB_XREF=gi:5662964 /DB_XREF=wo68g02.x1 /CLONE=IMAGE:2460530 /FEA=mRNA /CNT=41 /TID=Hs.25956.0 /TIER=Stack /STK=17 /UG=Hs.25956 /LL=25928 /UG_GENE=DKFZP564D206 /UG_TITLE=DKFZP564D206 protein
TMEM241	224493_x_at	0.000563415	-1.17749	-0.235718	1.17749	down	1.16883	0.22507	1.16883	up	1.02267	0.0323422	1.02267	up	-1.16741	-0.223312	1.16741	down	0.04382	-0.191898	0.26889	0.0761622	-0.179492	85019	Hs.137562	gb:BC006280.1 /DB_XREF=gi:13623356 /FEA=FLmRNA /CNT=1 /TID=HsAffx.900967.440 /TIER=FL /STK=0 /DEF=Homo sapiens, clone MGC:11386, mRNA, complete cds. /PROD=Unknown (protein for MGC:11386) /FL=gb:BC006280.1
ABI3BP	1559077_at	0.000598846	-1.03509	-0.0497576	1.03509	down	-1.00383	-0.0055192	1.00383	down	1.04899	0.068999	1.04899	up	1.13621	0.184234	1.13621	up	-0.0280007	-0.0777583	-0.0335199	0.0409982	0.156233	25890		gb:AL833204.1 /DB_XREF=gi:21733834 /TID=Hs2.356145.1 /CNT=7 /FEA=mRNA /TIER=ConsEnd /STK=0 /UG=Hs.356145 /UG_TITLE=Homo sapiens mRNA; cDNA DKFZp667H216 (from clone DKFZp667H216) /DEF=Homo sapiens mRNA; cDNA DKFZp667H216 (from clone DKFZp667H216).
MAMDC4	229473_at	0.000605336	-1.16085	-0.215176	1.16085	down	-1.26941	-0.344157	1.26941	down	-1.27532	-0.350858	1.27532	down	-1.18092	-0.239915	1.18092	down	0.23553	0.0203543	-0.108628	-0.115328	-0.00438471	158056	Hs.376780	gb:AI978986 /DB_XREF=gi:5804016 /DB_XREF=wr68h02.x1 /CLONE=IMAGE:2492883 /FEA=mRNA /CNT=12 /TID=Hs.297214.1 /TIER=Stack /STK=8 /UG=Hs.297214 /LL=29085 /UG_GENE=HSPC141 /UG_TITLE=HSPC141 protein
NLRC4	1552554_a_at	0.00061982	2.01163	1.00837	2.01163	up	2.89164	1.53189	2.89164	up	2.19268	1.13269	2.19268	up	2.20588	1.14136	2.20588	up	-1.05414	-0.0457754	0.477744	0.078552	0.0872149	58484	Hs.574741	gb:AY027790.1 /DB_XREF=gi:14324118 /GEN=CLAN1 /TID=Hs2.23248.1 /CNT=8 /FEA=FLmRNA /TIER=FL /STK=1 /LL=58484 /UG=Hs.23248 /DEF=Homo sapiens CLAND (CLAN1) mRNA, complete cds. /PROD=CLAND /FL=gb:AY027790.1 gb:NM_021209.2 gb:AY027789.1 gb:AY035391.1 gb:AY027787.1
ZBTB4	227047_x_at	0.000631908	-1.14784	-0.198919	1.14784	down	-1.22749	-0.295715	1.22749	down	-1.24879	-0.320532	1.24879	down	-1.27543	-0.350986	1.27543	down	0.245348	0.0464297	-0.0503663	-0.075184	-0.105638	57659	Hs.35096	gb:N63748 /DB_XREF=gi:1211577 /DB_XREF=za18f10.s1 /CLONE=IMAGE:292939 /FEA=EST /CNT=31 /TID=Hs.35096.2 /TIER=Stack /STK=12 /UG=Hs.35096 /LL=57659 /UG_GENE=KIAA1538 /UG_TITLE=KIAA1538 protein
FOXP2	1555516_at	0.000635829	1.0045	0.00647347	1.0045	up	1.24617	0.317505	1.24617	up	1.17359	0.230927	1.17359	up	1.03074	0.0436751	1.03074	up	-0.102653	-0.0961796	0.214852	0.128274	-0.0589779	93986		gb:BC018016.1 /DB_XREF=gi:17390020 /TID=Hs2Affx.1.342 /CNT=1 /FEA=FLmRNA /TIER=FL /STK=1 /NOTE=sequence(s) not in UniGene /DEF=Homo sapiens, clone MGC:24788 IMAGE:4285527, mRNA, complete cds. /PROD=Unknown (protein for MGC:24788) /FL=gb:BC018016.1
ZNF502	229532_at	0.000640586	-1.14644	-0.197161	1.14644	down	-1.28585	-0.362722	1.28585	down	-1.18601	-0.246117	1.18601	down	-1.29571	-0.373743	1.29571	down	0.241403	0.0442422	-0.121319	-0.00471412	-0.13234	91392	Hs.224843	gb:AI056364 /DB_XREF=gi:3330230 /DB_XREF=oy48c02.x1 /CLONE=IMAGE:1669058 /FEA=EST /CNT=18 /TID=Hs.62592.0 /TIER=Stack /STK=15 /UG=Hs.62592 /UG_TITLE=ESTs
ARF5	201526_at	0.000641086	1.29295	0.370665	1.29295	up	1.27698	0.352735	1.27698	up	1.2782	0.354112	1.2782	up	1.29297	0.370684	1.29297	up	-0.28119	0.0894752	0.0715451	0.0729222	0.089494	381	Hs.653202	gb:NM_001662.2 /DB_XREF=gi:6995999 /GEN=ARF5 /FEA=FLmRNA /CNT=228 /TID=Hs.77541.0 /TIER=FL+Stack /STK=86 /UG=Hs.77541 /LL=381 /DEF=Homo sapiens ADP-ribosylation factor 5 (ARF5), mRNA. /PROD=ADP-ribosylation factor 5 /FL=gb:NM_001662.2 gb:M57567.1 gb:BC003043.1
NUMA1	235539_at	0.000658703	-1.10985	-0.150363	1.10985	down	-1.27821	-0.35412	1.27821	down	-1.31362	-0.39355	1.31362	down	-1.36182	-0.445536	1.36182	down	0.32311	0.172747	-0.03101	-0.0704401	-0.122425	4926	Hs.325978	gb:AW964431 /DB_XREF=gi:8154267 /DB_XREF=EST376504 /FEA=EST /CNT=13 /TID=Hs.117773.0 /TIER=ConsEnd /STK=0 /UG=Hs.117773 /UG_TITLE=ESTs
	243920_x_at	0.000670447	1.07666	0.106557	1.07666	up	1.15818	0.211856	1.15818	up	1.06531	0.0912745	1.06531	up	1.10207	0.140219	1.10207	up	-0.0959694	0.0105877	0.115887	-0.00469492	0.0442494		Hs.648609	gb:BF213386 /DB_XREF=gi:11106972 /DB_XREF=601845131F1 /CLONE=IMAGE:4070575 /FEA=EST /CNT=8 /TID=Hs.244283.0 /TIER=ConsEnd /STK=0 /UG=Hs.244283 /UG_TITLE=ESTs
ABCG1	232081_at	0.000680382	-1.56677	-0.64779	1.56677	down	-1.61594	-0.692369	1.61594	down	-1.34752	-0.430312	1.34752	down	-1.55519	-0.637095	1.55519	down	0.525017	-0.122773	-0.167352	0.0947053	-0.112078	9619	Hs.124649	gb:AL355688.1 /DB_XREF=gi:7799136 /FEA=mRNA /CNT=14 /TID=Hs.6655.0 /TIER=ConsEnd /STK=0 /UG=Hs.6655 /UG_TITLE=Homo sapiens EST from clone 208499, full insert /DEF=Homo sapiens EST from clone 208499, full insert.
LRTOMT	1568882_at	0.000696843	1.08694	0.120273	1.08694	up	1.12999	0.17631	1.12999	up	1.16885	0.225093	1.16885	up	1.14774	0.198797	1.14774	up	-0.146886	-0.0266127	0.0294247	0.0782073	0.0519119	220074		gb:BC035223.1 /DB_XREF=gi:23274165 /TID=Hs2.381210.1 /CNT=3 /FEA=mRNA /TIER=ConsEnd /STK=1 /UG=Hs.381210 /UG_TITLE=Homo sapiens, Similar to hypothetical protein FLJ20378, clone IMAGE:4821851, mRNA /DEF=Homo sapiens, Similar to hypothetical protein FLJ20378, clone IMAGE:4821851, mRNA.
	231818_x_at	0.000716038	-1.12955	-0.17575	1.12955	down	-1.11039	-0.151067	1.11039	down	-1.21781	-0.284294	1.21781	down	-1.29617	-0.374255	1.29617	down	0.162999	-0.0127516	0.0119313	-0.121295	-0.211256		Hs.654763	gb:AK023965.1 /DB_XREF=gi:10436100 /FEA=mRNA /CNT=50 /TID=Hs.128927.0 /TIER=ConsEnd /STK=0 /UG=Hs.128927 /UG_TITLE=Homo sapiens cDNA FLJ13903 fis, clone THYRO1001854 /DEF=Homo sapiens cDNA FLJ13903 fis, clone THYRO1001854.
MAP2K7	216206_x_at	0.000724055	-1.06104	-0.0854799	1.06104	down	-1.126	-0.171202	1.126	down	-1.36511	-0.449015	1.36511	down	-1.46846	-0.554308	1.46846	down	0.18908	0.1036	0.0178782	-0.259935	-0.365228	5609		gb:BC005365.1 /DB_XREF=gi:13529199 /FEA=mRNA /CNT=2 /TID=Hs.331237.0 /TIER=ConsEnd /STK=0 /UG=Hs.331237 /DEF=Homo sapiens, clone IMAGE:3829438, mRNA, partial cds. /PROD=Unknown (protein for IMAGE:3829438)
MSMB	207430_s_at	0.000748953	-1.08799	-0.121671	1.08799	down	1.00289	0.00416983	1.00289	up	1.01791	0.025616	1.01791	up	1.06029	0.0844614	1.06029	up	0.0129171	-0.108754	0.0170869	0.0385331	0.0973786	4477	Hs.255462	gb:NM_002443.1 /DB_XREF=gi:4557035 /GEN=MSMB /FEA=FLmRNA /CNT=4 /TID=Hs.183752.0 /TIER=FL /STK=0 /UG=Hs.183752 /LL=4477 /DEF=Homo sapiens microseminoprotein, beta- (MSMB), mRNA. /PROD=microseminoprotein, beta- /FL=gb:NM_002443.1
PRR12	226716_at	0.000763479	-1.22826	-0.296616	1.22826	down	-1.2464	-0.317762	1.2464	down	-1.26418	-0.338201	1.26418	down	-1.12277	-0.167065	1.12277	down	0.234445	-0.0621703	-0.0833169	-0.103755	0.0673801	57479	Hs.590971	gb:AB033031.1 /DB_XREF=gi:6330471 /GEN=KIAA1205 /FEA=mRNA /CNT=37 /TID=Hs.104417.0 /TIER=Stack /STK=23 /UG=Hs.104417 /LL=57479 /DEF=Homo sapiens mRNA for KIAA1205 protein, partial cds. /PROD=KIAA1205 protein
LMO4	209204_at	0.000779901	-1.08269	-0.114616	1.08269	down	-1.14025	-0.189353	1.14025	down	-1.2295	-0.298068	1.2295	down	-1.3011	-0.379737	1.3011	down	0.167319	0.0527039	-0.0220331	-0.130749	-0.212417	8543	Hs.436792	gb:AI824831 /DB_XREF=gi:5445502 /DB_XREF=wb02d08.x1 /CLONE=IMAGE:2304495 /FEA=FLmRNA /CNT=175 /TID=Hs.3844.0 /TIER=Stack /STK=13 /UG=Hs.3844 /LL=8543 /UG_GENE=LMO4 /UG_TITLE=LIM domain only 4 /FL=gb:NM_006769.2 gb:U24576.1 gb:BC003600.1
MYBBP1A	233803_s_at	0.00079244	-1.10754	-0.147361	1.10754	down	-1.11617	-0.158555	1.11617	down	-1.21497	-0.280922	1.21497	down	-1.17464	-0.232222	1.17464	down	0.163179	0.015818	0.00462394	-0.117743	-0.0690431	10514	Hs.701718	gb:AL136595.1 /DB_XREF=gi:13276690 /GEN=DKFZp761F0324 /FEA=mRNA /CNT=2 /TID=Hs.22824.2 /TIER=ConsEnd /STK=0 /UG=Hs.22824 /LL=10514 /DEF=Homo sapiens mRNA; cDNA DKFZp761F0324 (from clone DKFZp761F0324). /PROD=hypothetical protein
MUC20	231941_s_at	0.000814535	-1.11061	-0.151353	1.11061	down	-1.16576	-0.221272	1.16576	down	-1.20984	-0.274821	1.20984	down	-1.14081	-0.190058	1.14081	down	0.19677	0.0454172	-0.0245016	-0.0780503	0.00671206	200958	Hs.308992	gb:AB037780.1 /DB_XREF=gi:7243098 /GEN=KIAA1359 /FEA=mRNA /CNT=32 /TID=Hs.69321.1 /TIER=ConsEnd /STK=0 /UG=Hs.69321 /LL=57550 /DEF=Homo sapiens mRNA for KIAA1359 protein, partial cds. /PROD=KIAA1359 protein
	1555488_at	0.000831473	1.09284	0.12808	1.09284	up	1.21075	0.275898	1.21075	up	1.15012	0.201786	1.15012	up	1.16834	0.224464	1.16834	up	-0.171488	-0.0434071	0.104411	0.0302981	0.0529759			gb:AF090894.1 /DB_XREF=gi:6690164 /TID=Hs2Affx.1.330 /CNT=1 /FEA=FLmRNA /TIER=FL /STK=1 /NOTE=sequence(s) not in UniGene /DEF=Homo sapiens clone HQ0113 PRO0113 mRNA, complete cds. /PROD=PRO0113 /FL=gb:AF090894.1
GALC	211810_s_at	0.000856226	1.58076	0.660622	1.58076	up	1.66177	0.732719	1.66177	up	1.33141	0.412957	1.33141	up	1.48696	0.572363	1.48696	up	-0.487066	0.173556	0.245653	-0.0741093	0.0852973	2581	Hs.513439	gb:D25284.1 /DB_XREF=gi:457445 /FEA=FLmRNA /CNT=2 /TID=Hs.273.1 /TIER=FL /STK=1 /UG=Hs.273 /LL=2581 /UG_GENE=GALC /DEF=Human mRNA for alternative spliced product of galactocerebrosidase, complete cds. /PROD=alternative spliced product ofgalactocerebrosidase /FL=gb:D25284.1
LINC00470	234712_at	0.000860247	1.02697	0.0383915	1.02697	up	1.12573	0.170861	1.12573	up	1.12844	0.174335	1.12844	up	1.16823	0.22432	1.16823	up	-0.122942	-0.0845504	0.0479195	0.0513928	0.101378	56651		gb:AF295730.1 /DB_XREF=gi:13160665 /FEA=mRNA /CNT=1 /TID=Hs.326788.1 /TIER=ConsEnd /STK=0 /UG=Hs.326788 /UG_TITLE=Homo sapiens C18orf2 isoform 6 mRNA, complete sequence, alternatively spliced /DEF=Homo sapiens C18orf2 isoform 6 mRNA, complete sequence, alternatively spliced.
ZFHX3	208033_s_at	0.000871239	-1.52422	-0.608067	1.52422	down	-1.35265	-0.435791	1.35265	down	-1.37701	-0.461541	1.37701	down	-1.38086	-0.465571	1.38086	down	0.421926	-0.186141	-0.0138652	-0.039615	-0.0436448	463	Hs.598297	gb:NM_006885.1 /DB_XREF=gi:5901893 /GEN=ATBF1 /FEA=FLmRNA /CNT=2 /TID=Hs.101842.0 /TIER=FL /STK=0 /UG=Hs.101842 /LL=463 /DEF=Homo sapiens AT-binding transcription factor 1 (ATBF1), mRNA. /PROD=AT-binding transcription factor 1 /FL=gb:NM_006885.1 gb:D10250.1
LINC01424	242798_at	0.000877973	-1.02128	-0.0303855	1.02128	down	-1.07211	-0.100456	1.07211	down	1.03914	0.0553924	1.03914	up	1.05556	0.0780026	1.05556	up	0.0159103	-0.0144752	-0.0845452	0.0713027	0.0939129	101928689		gb:AI247368 /DB_XREF=gi:3842765 /DB_XREF=qh40a05.x1 /CLONE=IMAGE:1847120 /FEA=EST /CNT=3 /TID=Hs.116142.0 /TIER=ConsEnd /STK=3 /UG=Hs.116142 /UG_TITLE=ESTs
TMEM212	217016_x_at	0.000885358	-1.12086	-0.164602	1.12086	down	1.08223	0.114001	1.08223	up	-1.06077	-0.0851095	1.06077	down	-1.17505	-0.232717	1.17505	down	0.063502	-0.1011	0.177503	-0.0216075	-0.169215	389177	Hs.642307	gb:AK026825.1 /DB_XREF=gi:10439771 /FEA=mRNA /CNT=1 /TID=Hs.306885.0 /TIER=ConsEnd /STK=0 /UG=Hs.306885 /UG_TITLE=Homo sapiens cDNA: FLJ23172 fis, clone LNG10005 /DEF=Homo sapiens cDNA: FLJ23172 fis, clone LNG10005.
PPARA	244689_at	0.00091719	-1.14237	-0.192032	1.14237	down	-1.13008	-0.17642	1.13008	down	-1.23898	-0.309151	1.23898	down	-1.30704	-0.386301	1.30704	down	0.181065	-0.010967	0.0046454	-0.128086	-0.205236	5465	Hs.103110	gb:AA461080 /DB_XREF=gi:2186200 /DB_XREF=zx63e03.s1 /CLONE=IMAGE:796156 /FEA=EST /CNT=7 /TID=Hs.272006.0 /TIER=ConsEnd /STK=1 /UG=Hs.272006 /UG_TITLE=ESTs
NOP2	214427_at	0.000946678	-1.31223	-0.392024	1.31223	down	-1.40704	-0.492668	1.40704	down	-1.45462	-0.540639	1.45462	down	-1.25567	-0.32846	1.25567	down	0.350679	-0.0413453	-0.14199	-0.189961	0.0222182	4839	Hs.534334	gb:NM_006170.1 /DB_XREF=gi:5453791 /GEN=NOL1 /FEA=FLmRNA /CNT=152 /TID=Hs.15243.0 /TIER=FL /STK=0 /UG=Hs.15243 /LL=4839 /DEF=Homo sapiens nucleolar protein 1 (120kD) (NOL1), mRNA. /PROD=nucleolar protein 1 (120kD) /FL=gb:BC000656.1 gb:NM_006170.1 gb:M32110.1
CDH7	1554700_at	0.000950256	-1.03063	-0.0435333	1.03063	down	1.04207	0.0594488	1.04207	up	1.07332	0.102087	1.07332	up	1.08109	0.112493	1.08109	up	-0.042576	-0.0861093	0.0168728	0.0595106	0.0699166	1005	Hs.657522	gb:BC036786.1 /DB_XREF=gi:23331157 /TID=Hs2.272211.3 /CNT=5 /FEA=FLmRNA /TIER=FL /STK=1 /LL=1005 /UG_GENE=CDH7 /UG=Hs.272211 /DEF=Homo sapiens, similar to cadherin, clone MGC:45983 IMAGE:5744842, mRNA, complete cds. /PROD=similar to cadherin /FL=gb:BC036786.1
TYRP1	205694_at	0.000964216	1.09768	0.134459	1.09768	up	1.10894	0.14918	1.10894	up	1.07925	0.11003	1.07925	up	1.10612	0.145506	1.10612	up	-0.105247	0.0292115	0.0439322	0.00478293	0.0402584	7306	Hs.270279	gb:NM_000550.1 /DB_XREF=gi:4507756 /GEN=TYRP1 /FEA=FLmRNA /CNT=45 /TID=Hs.75219.0 /TIER=FL /STK=2 /UG=Hs.75219 /LL=7306 /DEF=Homo sapiens tyrosinase-related protein 1 (TYRP1), mRNA. /PROD=tyrosinase-related protein 1 /FL=gb:NM_000550.1
PTGES	210367_s_at	0.000967479	1.30377	0.382689	1.30377	up	1.69073	0.757646	1.69073	up	1.07104	0.0990142	1.07104	up	-1.11489	-0.156907	1.11489	down	-0.0198671	0.362822	0.737779	0.0791471	-0.176774	9536	Hs.146688	gb:AF010316.1 /DB_XREF=gi:2415307 /GEN=PIG12 /FEA=FLmRNA /CNT=21 /TID=Hs.146688.1 /TIER=FL /STK=0 /UG=Hs.146688 /LL=9536 /DEF=Homo sapiens Pig12 (PIG12) mRNA, complete cds. /PROD=Pig12 /FL=gb:AF010316.1
	244480_at	0.000972294	1.0866	0.119827	1.0866	up	1.12302	0.167387	1.12302	up	1.08679	0.120072	1.08679	up	1.13401	0.181436	1.13401	up	-0.111379	0.00844789	0.0560085	0.00869322	0.0700575		Hs.671803	gb:AW451426 /DB_XREF=gi:6992202 /DB_XREF=UI-H-BI3-ali-a-10-0-UI.s1 /CLONE=IMAGE:2736690 /FEA=EST /CNT=3 /TID=Hs.252740.0 /TIER=ConsEnd /STK=3 /UG=Hs.252740 /UG_TITLE=ESTs
H2BFXP///LOC100101478	230664_at	0.00101587	-1.19798	-0.260599	1.19798	down	-1.29732	-0.375533	1.29732	down	-1.26279	-0.336618	1.26279	down	-1.15998	-0.214103	1.15998	down	0.297736	0.0371366	-0.0777972	-0.0388821	0.0836328	767811///100101478	Hs.496530	gb:H09657 /DB_XREF=gi:874479 /DB_XREF=yl99e07.s1 /CLONE=IMAGE:46232 /FEA=EST /CNT=10 /TID=Hs.30936.0 /TIER=Stack /STK=10 /UG=Hs.30936 /UG_TITLE=ESTs
KDELR3	204017_at	0.00105609	1.09426	0.129958	1.09426	up	1.05774	0.0809804	1.05774	up	1.0772	0.107283	1.0772	up	1.19294	0.254524	1.19294	up	-0.0825739	0.0473843	-0.00159351	0.0247086	0.17195	11015	Hs.745072	gb:NM_006855.2 /DB_XREF=gi:8051612 /GEN=KDELR3 /FEA=FLmRNA /CNT=84 /TID=Hs.250696.0 /TIER=FL+Stack /STK=43 /UG=Hs.250696 /LL=11015 /DEF=Homo sapiens KDEL (Lys-Asp-Glu-Leu) endoplasmic reticulum protein retention receptor 3 (KDELR3), transcript variant 1, mRNA. /PROD=KDEL receptor 3, isoform a /FL=gb:BC001277.1 gb:NM_006855.2
	1570482_at	0.00106219	1.04825	0.0679862	1.04825	up	1.11792	0.160812	1.11792	up	1.02859	0.0406692	1.02859	up	-1.02821	-0.0401332	1.02821	down	-0.0419694	0.0260168	0.118843	-0.00130028	-0.0821026			gb:AF318340.1 /DB_XREF=gi:18027771 /GEN=pp14356 /TID=Hs2.382864.1 /CNT=1 /FEA=mRNA /TIER=ConsEnd /STK=0 /UG=Hs.382864 /DEF=Homo sapiens pp14356 mRNA, complete cds. /PROD=unknown
PLD1	215723_s_at	0.00107764	1.44929	0.535346	1.44929	up	1.85806	0.893799	1.85806	up	1.66397	0.734628	1.66397	up	1.71508	0.778273	1.71508	up	-0.546136	-0.0107897	0.347663	0.188492	0.232137	5337	Hs.382865	gb:AJ276230.1 /DB_XREF=gi:7161182 /GEN=PLD1 /FEA=mRNA /CNT=4 /TID=Hs.82587.1 /TIER=ConsEnd /STK=0 /UG=Hs.82587 /LL=5337 /DEF=Homo sapiens mRNA for partial phospholipase D1, splice variant PLD1ab2. /PROD=phospholipase D1
ELOVL2-AS1	237365_at	0.00107829	1.05539	0.0777733	1.05539	up	1.17877	0.237281	1.17877	up	1.12587	0.171039	1.12587	up	1.02974	0.042284	1.02974	up	-0.116554	-0.0387811	0.120726	0.0544847	-0.0742705	100506409	Hs.43818	gb:AI798981 /DB_XREF=gi:5364453 /DB_XREF=we97b02.x1 /CLONE=IMAGE:2349003 /FEA=EST /CNT=7 /TID=Hs.21965.0 /TIER=ConsEnd /STK=6 /UG=Hs.21965 /UG_TITLE=ESTs
TRIM3	213885_at	0.00108285	-1.24974	-0.321627	1.24974	down	-1.13837	-0.186968	1.13837	down	-1.20417	-0.26804	1.20417	down	-1.2227	-0.290072	1.2227	down	0.209322	-0.112305	0.022354	-0.0587184	-0.0807496	10612	Hs.591992	gb:AA114843 /DB_XREF=gi:1669911 /DB_XREF=zl02f12.s1 /CLONE=IMAGE:491183 /FEA=mRNA /CNT=25 /TID=Hs.183454.1 /TIER=Stack /STK=12 /UG=Hs.183454 /UG_TITLE=Homo sapiens mRNA; cDNA DKFZp434N1221 (from clone DKFZp434N1221)
TRMU	213634_s_at	0.00110399	-1.14599	-0.196591	1.14599	down	-1.24563	-0.316881	1.24563	down	-1.22043	-0.287393	1.22043	down	-1.25152	-0.323679	1.25152	down	0.233736	0.0371451	-0.0831442	-0.0536561	-0.089943	55687	Hs.439524	gb:AL031588 /DB_XREF=gi:4007108 /FEA=DNA_2 /CNT=27 /TID=Hs.250671.1 /TIER=Stack /STK=17 /UG=Hs.250671 /LL=55687 /UG_GENE=FLJ10140 /UG_TITLE=hypothetical protein FLJ10140 /DEF=Human DNA sequence from clone 1163J1 on chromosome 22q13.2-13.33. Contains the 3 part of a gene for a novel KIAA0279 LIKE EGF-like domain containing protein (similar to mouse Celsr1, rat MEGF2), a novel gene for a protein si…
CDC42BPA	203794_at	0.00111949	-1.00581	-0.00835554	1.00581	down	1.1747	0.232294	1.1747	up	1.18782	0.248319	1.18782	up	1.15691	0.210277	1.15691	up	-0.106261	-0.114617	0.126033	0.142058	0.104016	8476	Hs.35433	gb:NM_014826.1 /DB_XREF=gi:7662135 /GEN=KIAA0451 /FEA=FLmRNA /CNT=92 /TID=Hs.18586.0 /TIER=FL+Stack /STK=28 /UG=Hs.18586 /LL=9876 /DEF=Homo sapiens KIAA0451 gene product (KIAA0451), mRNA. /PROD=KIAA0451 gene product /FL=gb:AB007920.1 gb:NM_014826.1
VEZT	207263_x_at	0.00112687	-1.10667	-0.146228	1.10667	down	-1.04188	-0.0591954	1.04188	down	-1.12785	-0.173574	1.12785	down	-1.19476	-0.256717	1.19476	down	0.126391	-0.0198378	0.0671952	-0.0471834	-0.130327	55591		gb:NM_017599.1 /DB_XREF=gi:8922162 /GEN=DKFZp761C241 /FEA=FLmRNA /CNT=5 /TID=Hs.24135.0 /TIER=FL /STK=1 /UG=Hs.24135 /LL=55591 /DEF=Homo sapiens transmembrane protein vezatin; hypothetical protein DKFZp761C241 (DKFZp761C241), mRNA. /PROD=transmembrane protein vezatin; hypotheticalprotein DKFZp761C241 /FL=gb:NM_017599.1
	1563577_at	0.00125027	1.04963	0.0698862	1.04963	up	1.17012	0.226653	1.17012	up	1.14184	0.191357	1.14184	up	1.12982	0.176096	1.12982	up	-0.124483	-0.054597	0.10217	0.0668741	0.0516132		Hs.638557	gb:AL833881.1 /DB_XREF=gi:21739387 /TID=Hs2.376805.1 /CNT=1 /FEA=mRNA /TIER=ConsEnd /STK=0 /UG=Hs.376805 /UG_TITLE=Homo sapiens mRNA; cDNA DKFZp434L1127 (from clone DKFZp434L1127) /DEF=Homo sapiens mRNA; cDNA DKFZp434L1127 (from clone DKFZp434L1127).
BAD	209364_at	0.00125781	1.29903	0.37743	1.29903	up	1.38302	0.467819	1.38302	up	1.31876	0.399179	1.31876	up	1.35621	0.439584	1.35621	up	-0.304383	0.0730466	0.163436	0.0947957	0.135201	572	Hs.370254	gb:U66879.1 /DB_XREF=gi:1683636 /GEN=bbc6 /FEA=FLmRNA /CNT=138 /TID=Hs.76366.0 /TIER=FL+Stack /STK=83 /UG=Hs.76366 /LL=572 /DEF=Human Bcl-2 binding component 6 (bbc6) mRNA, complete cds. /PROD=Bcl-2 binding component 6 /FL=gb:BC001901.1 gb:U66879.1 gb:NM_004322.1 gb:AF031523.1
C1orf168	238625_at	0.00126359	-1.00155	-0.00224089	1.00155	down	1.07806	0.108442	1.07806	up	1.02533	0.0360947	1.02533	up	1.0307	0.0436261	1.0307	up	-0.0277761	-0.030017	0.0806663	0.00831866	0.01585	199920	Hs.437655	gb:AI452457 /DB_XREF=gi:4285745 /DB_XREF=tj62b10.x1 /CLONE=IMAGE:2146075 /FEA=EST /CNT=11 /TID=Hs.145526.0 /TIER=ConsEnd /STK=3 /UG=Hs.145526 /UG_TITLE=ESTs
FAM120A	1555908_at	0.00128304	1.18932	0.250136	1.18932	up	1.07924	0.110018	1.07924	up	1.15169	0.203751	1.15169	up	1.2231	0.290539	1.2231	up	-0.136275	0.113861	-0.0262569	0.0674762	0.154264	23196		gb:BF591199 /DB_XREF=gi:11683523 /DB_XREF=7h43c12.x1 /CLONE=IMAGE:3318742 /TID=Hs2.76666.4 /CNT=32 /FEA=mRNA /TIER=Stack /STK=10 /LL=23196 /UG_GENE=C9orf10 /UG=Hs.76666 /UG_TITLE=chromosome 9 open reading frame 10
	232569_at	0.00138216	-1.27756	-0.353394	1.27756	down	-1.25285	-0.325209	1.25285	down	-1.28473	-0.361469	1.28473	down	-1.26337	-0.337272	1.26337	down	0.29563	-0.0577638	-0.0295786	-0.0658388	-0.0416415		Hs.664710	gb:AK024255.1 /DB_XREF=gi:10436585 /FEA=mRNA /CNT=6 /TID=Hs.162990.0 /TIER=ConsEnd /STK=0 /UG=Hs.162990 /UG_TITLE=Homo sapiens cDNA FLJ14193 fis, clone NT2RP3001115 /DEF=Homo sapiens cDNA FLJ14193 fis, clone NT2RP3001115.
FAM135B	1557838_at	0.00138368	1.03214	0.0456408	1.03214	up	1.1018	0.139866	1.1018	up	1.05668	0.0795452	1.05668	up	1.04947	0.0696585	1.04947	up	-0.0742459	-0.0286051	0.0656198	0.00529934	-0.00458739	51059	Hs.662285	gb:BC038357.1 /DB_XREF=gi:23468268 /TID=Hs2.145221.1 /CNT=3 /FEA=mRNA /TIER=ConsEnd /STK=1 /UG=Hs.145221 /UG_TITLE=Homo sapiens, clone IMAGE:4823092, mRNA /DEF=Homo sapiens, clone IMAGE:4823092, mRNA.
	240655_at	0.00138403	1.59715	0.6755	1.59715	up	1.52332	0.607223	1.52332	up	1.22042	0.287375	1.22042	up	1.0378	0.0535316	1.0378	up	-0.201368	0.474131	0.405855	0.0860064	-0.147837			gb:BE502785 /DB_XREF=gi:9705193 /DB_XREF=hz79c12.x1 /CLONE=IMAGE:3214198 /FEA=EST /CNT=4 /TID=Hs.202242.0 /TIER=ConsEnd /STK=4 /UG=Hs.202242 /UG_TITLE=ESTs
DSPP	221681_s_at	0.00140421	-1.23074	-0.299521	1.23074	down	-1.10542	-0.144593	1.10542	down	-1.17653	-0.234535	1.17653	down	-1.25109	-0.323184	1.25109	down	0.210315	-0.0892061	0.0657218	-0.0242202	-0.112869	1834	Hs.678914	gb:AF094508.1 /DB_XREF=gi:4322669 /FEA=FLmRNA /CNT=1 /TID=Hs.274465.1 /TIER=FL /STK=0 /UG=Hs.274465 /LL=1834 /UG_GENE=DSPP /DEF=Homo sapiens dentin phosphoryn mRNA, complete cds. /PROD=dentin phosphoryn /FL=gb:AF094508.1
	216527_at	0.00140719	-1.09121	-0.125925	1.09121	down	1.13696	0.18518	1.13696	up	-1.007	-0.0100662	1.007	down	-1.23411	-0.303475	1.23411	down	0.0688459	-0.0570794	0.254026	0.0587797	-0.234629		Hs.663638	gb:AL049252.1 /DB_XREF=gi:4499993 /FEA=mRNA /CNT=1 /TID=Hs.302048.0 /TIER=ConsEnd /STK=0 /UG=Hs.302048 /UG_TITLE=Homo sapiens mRNA; cDNA DKFZp564D193 (from clone DKFZp564D193) /DEF=Homo sapiens mRNA; cDNA DKFZp564D193 (from clone DKFZp564D193).
	1557908_at	0.00143338	-1.04501	-0.0635158	1.04501	down	1.08478	0.117405	1.08478	up	1.07223	0.100612	1.07223	up	1.07062	0.0984426	1.07062	up	-0.0631385	-0.126654	0.0542667	0.0374731	0.0353041		Hs.585496	gb:AW956783 /DB_XREF=gi:8146466 /DB_XREF=EST368853 /TID=Hs2.17681.4 /CNT=82 /FEA=mRNA /TIER=ConsEnd /STK=0 /LL=114609 /UG_GENE=TIRAP /UG=Hs.17681 /UG_TITLE=Toll-interleukin 1 receptor (TIR) domain-containing adapter protein
B4GALT7	222191_s_at	0.00145467	-1.1339	-0.181294	1.1339	down	-1.10437	-0.143225	1.10437	down	-1.23588	-0.305538	1.23588	down	-1.27116	-0.346148	1.27116	down	0.21288	0.0315865	0.069655	-0.0926572	-0.133267	11285	Hs.455109	gb:AK022566.1 /DB_XREF=gi:10434029 /FEA=mRNA /CNT=2 /TID=Hs.54702.1 /TIER=ConsEnd /STK=0 /UG=Hs.54702 /LL=11285 /UG_GENE=B4GALT7 /UG_TITLE=xylosylprotein beta1,4-galactosyltransferase, polypeptide 7 (galactosyltransferase I) /DEF=Homo sapiens cDNA FLJ12504 fis, clone NT2RM2001698, highly similar to Homo sapiens XGalT-1 mRNA for galactosyltransferase I.
	1556944_at	0.00150379	1.0544	0.0764252	1.0544	up	1.03836	0.054306	1.03836	up	1.04083	0.0577379	1.04083	up	1.13334	0.180577	1.13334	up	-0.0472229	0.0292023	0.00708307	0.010515	0.133354		Hs.741754	gb:AK057554.1 /DB_XREF=gi:16553300 /TID=Hs2.128166.1 /CNT=3 /FEA=mRNA /TIER=ConsEnd /STK=2 /UG=Hs.128166 /UG_TITLE=Homo sapiens cDNA FLJ32992 fis, clone THYMU1000098. /DEF=Homo sapiens cDNA FLJ32992 fis, clone THYMU1000098.
AP1S1	205196_s_at	0.00150549	1.09645	0.132837	1.09645	up	1.13463	0.182224	1.13463	up	1.07734	0.107471	1.07734	up	1.32747	0.408683	1.32747	up	-0.129147	0.00368982	0.0530768	-0.0216754	0.279537	1174	Hs.489365	gb:NM_001283.1 /DB_XREF=gi:4557470 /GEN=AP1S1 /FEA=FLmRNA /CNT=47 /TID=Hs.57600.0 /TIER=FL /STK=0 /UG=Hs.57600 /LL=1174 /DEF=Homo sapiens adaptor-related protein complex 1, sigma 1 subunit (AP1S1), mRNA. /PROD=adaptor-related protein complex 1, sigma 1subunit /FL=gb:AB015319.1 gb:NM_001283.1
CD63	200663_at	0.00151224	1.44917	0.535224	1.44917	up	1.41743	0.503276	1.41743	up	1.24122	0.311762	1.24122	up	1.46093	0.546889	1.46093	up	-0.392315	0.14291	0.110961	-0.0805522	0.154574	967	Hs.445570	gb:NM_001780.1 /DB_XREF=gi:4502678 /GEN=CD63 /FEA=FLmRNA /CNT=457 /TID=Hs.76294.0 /TIER=FL+Stack /STK=177 /UG=Hs.76294 /LL=967 /DEF=Homo sapiens CD63 antigen (melanoma 1 antigen) (CD63), mRNA. /PROD=CD63 antigen (melanoma 1 antigen) /FL=gb:BC002349.1 gb:NM_001780.1 gb:M59907.1
DIAPH3	220997_s_at	0.00151505	1.14847	0.199711	1.14847	up	1.09788	0.134719	1.09788	up	1.06565	0.0917383	1.06565	up	1.0778	0.108093	1.0778	up	-0.0907865	0.108924	0.0439321	0.000951795	0.0173069	81624	Hs.283127	gb:NM_030932.1 /DB_XREF=gi:13569894 /GEN=DKFZP434C0931 /FEA=FLmRNA /CNT=1 /TID=HsAffx.900122.82 /TIER=FL /STK=0 /DEF=Homo sapiens diaphanous (Drosophila, homolog) 3 (DKFZP434C0931), mRNA. /PROD=diaphanous (Drosophila, homolog) 3 /FL=gb:NM_030932.1
GNB5	1554346_at	0.00152061	1.03994	0.0564957	1.03994	up	1.13264	0.179695	1.13264	up	1.14243	0.192111	1.14243	up	1.07031	0.0980335	1.07031	up	-0.107656	-0.0511604	0.0720392	0.084455	-0.00962253	10681	Hs.155090	gb:BC011671.1 /DB_XREF=gi:15079704 /TID=Hs2.155090.3 /CNT=3 /FEA=FLmRNA /TIER=FL /STK=2 /LL=10681 /UG_GENE=GNB5 /UG=Hs.155090 /DEF=Homo sapiens, Similar to guanine nucleotide binding protein (G protein), beta 5, clone MGC:15233 IMAGE:4131809, mRNA, complete cds. /PROD=Similar to guanine nucleotide binding protein (Gprotein), beta 5 /FL=gb:BC011671.1
ATAD3A///ATAD3B	1552641_s_at	0.00152223	-1.18505	-0.244952	1.18505	down	-1.32105	-0.401684	1.32105	down	-1.19155	-0.252838	1.19155	down	-1.17208	-0.229072	1.17208	down	0.231318	-0.0136341	-0.170366	-0.0215208	0.00224609	55210///83858	Hs.23413///Hs.729021	gb:NM_031921.1 /DB_XREF=gi:13994293 /GEN=TOB3 /TID=Hs2.380162.1 /CNT=17 /FEA=FLmRNA /TIER=FL /STK=2 /LL=83858 /UG=Hs.380162 /DEF=Homo sapiens AAA-ATPase TOB3 (TOB3), mRNA. /PROD=AAA-ATPase TOB3 /FL=gb:NM_031921.1 gb:AF343078.1
APAF1	211554_s_at	0.00155633	1.30391	0.382849	1.30391	up	1.62208	0.697849	1.62208	up	1.43067	0.516686	1.43067	up	1.43184	0.517872	1.43184	up	-0.473579	-0.0907296	0.22427	0.043107	0.0442931	317	Hs.552567	gb:AF149794.1 /DB_XREF=gi:4929486 /GEN=APAF1 /FEA=FLmRNA /CNT=4 /TID=Hs.77579.2 /TIER=FL /STK=0 /UG=Hs.77579 /LL=317 /DEF=Homo sapiens apoptotic protease activating factor 1 (APAF1) mRNA, complete cds. /PROD=apoptotic protease activating factor 1 /FL=gb:AF248734.1 gb:AF149794.1
ANXA2P1	210876_at	0.00155976	-1.27712	-0.352889	1.27712	down	-1.20164	-0.265	1.20164	down	-1.28456	-0.361277	1.28456	down	-1.20914	-0.273979	1.20914	down	0.226011	-0.126878	-0.0389892	-0.135267	-0.0479683	303	Hs.546235	gb:M62896.1 /DB_XREF=gi:187146 /FEA=FLmRNA /CNT=2 /TID=Hs.234757.0 /TIER=FL /STK=0 /UG=Hs.234757 /UG_TITLE=Human lipocortin (LIP) 2 pseudogene mRNA, complete cds-like region /DEF=Human lipocortin (LIP) 2 pseudogene mRNA, complete cds-like region. /FL=gb:M62896.1
	214282_at	0.00156079	1.10126	0.139158	1.10126	up	1.10538	0.144543	1.10538	up	1.06448	0.0901444	1.06448	up	1.1065	0.146003	1.1065	up	-0.0920237	0.0471347	0.0525195	-0.00187924	0.0539794		Hs.655342	gb:AA191647 /DB_XREF=gi:1780377 /DB_XREF=zp82a10.s1 /CLONE=IMAGE:626682 /FEA=EST /CNT=11 /TID=Hs.296634.1 /TIER=Stack /STK=8 /UG=Hs.296634 /LL=1356 /UG_GENE=CP /UG_TITLE=ceruloplasmin (ferroxidase)
LOC339622	1561290_at	0.00156398	1.0589	0.0825689	1.0589	up	1.00621	0.0089286	1.00621	up	1.04463	0.0629894	1.04463	up	1.11532	0.157455	1.11532	up	-0.0443656	0.0382034	-0.035437	0.0186238	0.113089	339622	Hs.616316	gb:BC040319.1 /DB_XREF=gi:25955626 /TID=Hs2.434284.1 /CNT=2 /FEA=mRNA /TIER=ConsEnd /STK=1 /UG=Hs.434284 /UG_TITLE=Homo sapiens, clone IMAGE:4836841, mRNA /DEF=Homo sapiens, clone IMAGE:4836841, mRNA.
DISP1///LOC102724017	235466_s_at	0.00156747	-1.20129	-0.264581	1.20129	down	-1.41858	-0.504451	1.41858	down	-1.46171	-0.54766	1.46171	down	-1.38772	-0.472716	1.38772	down	0.411326	0.146745	-0.0931246	-0.136334	-0.06139	84976///102724017		gb:AI677948 /DB_XREF=gi:4888130 /DB_XREF=wc88h05.x1 /CLONE=IMAGE:2325753 /FEA=EST /CNT=9 /TID=Hs.101490.0 /TIER=ConsEnd /STK=5 /UG=Hs.101490 /UG_TITLE=ESTs
METTL7B	227055_at	0.00157496	2.89369	1.53291	2.89369	up	2.74501	1.45681	2.74501	up	1.82478	0.867722	1.82478	up	4.69159	2.23008	4.69159	up	-1.2544	0.278505	0.202408	-0.386683	0.975672	196410	Hs.51483	gb:AI827972 /DB_XREF=gi:5448730 /DB_XREF=wk31c11.x1 /CLONE=IMAGE:2413940 /FEA=EST /CNT=33 /TID=Hs.51483.0 /TIER=Stack /STK=18 /UG=Hs.51483 /UG_TITLE=ESTs, Weakly similar to hypothetical protein (H.sapiens)
ITGB3	204625_s_at	0.00158708	1.32656	0.407686	1.32656	up	1.26681	0.341195	1.26681	up	1.56894	0.649792	1.56894	up	2.5537	1.35259	2.5537	up	-0.301008	0.106678	0.040187	0.348784	1.05158	3690	Hs.218040	gb:BF115658 /DB_XREF=gi:10985134 /DB_XREF=7n82b10.x1 /CLONE=IMAGE:3571146 /FEA=FLmRNA /CNT=66 /TID=Hs.87149.0 /TIER=Stack /STK=16 /UG=Hs.87149 /LL=3690 /UG_GENE=ITGB3 /UG_TITLE=integrin, beta 3 (platelet glycoprotein IIIa, antigen CD61) /FL=gb:J02703.1 gb:M35999.1 gb:M20311.1 gb:NM_000212.1
LINC00152///MIR4435-2HG	225799_at	0.00160742	1.37292	0.457244	1.37292	up	1.28189	0.358269	1.28189	up	1.44302	0.529088	1.44302	up	1.38841	0.473432	1.38841	up	-0.359626	0.0976176	-0.00135761	0.169462	0.113806	112597///541471	Hs.560805///Hs.652166	gb:BF209337 /DB_XREF=gi:11102923 /DB_XREF=601872564F1 /CLONE=IMAGE:4096743 /FEA=EST /CNT=67 /TID=Hs.50724.0 /TIER=Stack /STK=44 /UG=Hs.50724 /UG_TITLE=Homo sapiens cDNA FLJ10934 fis, clone OVARC1000640
CTAGE15///CTAGE4///CTAGE8///CTAGE9///LOC101060696	214355_x_at	0.00161761	1.1989	0.261708	1.1989	up	1.13717	0.185442	1.13717	up	1.31761	0.397928	1.31761	up	1.25623	0.329097	1.25623	up	-0.222239	0.0394699	-0.0367965	0.175689	0.106859	441294///643854///100128553///100142659///101060696	Hs.450233///Hs.632613///Hs.661442///Hs.720693	gb:AW274747 /DB_XREF=gi:6661777 /DB_XREF=xn34e08.x1 /CLONE=IMAGE:2695622 /FEA=EST /CNT=9 /TID=Hs.270527.0 /TIER=Stack /STK=8 /UG=Hs.270527 /UG_TITLE=Homo sapiens mRNA; cDNA DKFZp434F0327 (from clone DKFZp434F0327)
RPARP-AS1	214857_at	0.00165152	-1.26872	-0.343369	1.26872	down	-1.41034	-0.496039	1.41034	down	-1.29905	-0.377457	1.29905	down	-1.18345	-0.242996	1.18345	down	0.366589	0.0232199	-0.129449	-0.0108675	0.123593	100505761	Hs.656457	gb:AL050035.1 /DB_XREF=gi:4884276 /FEA=mRNA /CNT=11 /TID=Hs.133130.1 /TIER=ConsEnd /STK=0 /UG=Hs.133130 /UG_TITLE=Homo sapiens mRNA; cDNA DKFZp566H0124 (from clone DKFZp566H0124) /DEF=Homo sapiens mRNA; cDNA DKFZp566H0124 (from clone DKFZp566H0124).
ZMYND11	1554158_at	0.00165998	1.05069	0.0713351	1.05069	up	-1.00236	-0.00339671	1.00236	down	1.06461	0.0903312	1.06461	up	1.1561	0.209269	1.1561	up	-0.0448395	0.0264956	-0.0482362	0.0454917	0.164429	10771	Hs.292265	gb:BC034784.1 /DB_XREF=gi:21961556 /TID=Hs2.301449.2 /CNT=15 /FEA=FLmRNA /TIER=FL /STK=3 /LL=10771 /UG_GENE=BS69 /UG=Hs.301449 /DEF=Homo sapiens, Similar to adenovirus 5 E1A binding protein, clone MGC:34429 IMAGE:5171494, mRNA, complete cds. /PROD=Similar to adenovirus 5 E1A binding protein /FL=gb:BC034784.1
FBXO9	1559096_x_at	0.00170158	1.34745	0.430234	1.34745	up	1.48029	0.565877	1.48029	up	1.52488	0.608696	1.52488	up	1.36963	0.453782	1.36963	up	-0.42793	0.00230493	0.137948	0.180766	0.0258523	26268		gb:AK095307.1 /DB_XREF=gi:21754540 /TID=Hs2.377970.1 /CNT=7 /FEA=mRNA /TIER=ConsEnd /STK=0 /UG=Hs.377970 /UG_TITLE=Homo sapiens cDNA FLJ37996 fis, clone CTONG2011920, weakly similar to Homo sapiens NY-REN-57 antigen mRNA. /DEF=Homo sapiens cDNA FLJ37988 fis, clone CTONG2011474, moderately similar to Homo sapiens NY-REN-57 antigen mRNA.
GIGYF1	228755_at	0.0017154	-1.40627	-0.491871	1.40627	down	-1.22104	-0.288107	1.22104	down	-1.21657	-0.282816	1.21657	down	-1.16495	-0.220266	1.16495	down	0.245546	-0.246325	-0.0425617	-0.0372705	0.02528	64599	Hs.414396	gb:NM_022574.1 /DB_XREF=gi:12007655 /GEN=AF053356-CDS2 /FEA=FLmRNA /CNT=20 /TID=Hs.296336.0 /TIER=FL+Stack /STK=9 /UG=Hs.296336 /LL=64599 /DEF=Homo sapiens hypothetical protein AF053356-CDS2 (AF053356-CDS2), mRNA. /PROD=hypothetical protein AF053356-CDS2 /FL=gb:NM_022574.1
	240835_at	0.00172058	1.06454	0.090229	1.06454	up	1.10173	0.139766	1.10173	up	1.17942	0.238081	1.17942	up	1.09769	0.134477	1.09769	up	-0.114121	-0.0238924	0.0256449	0.12396	0.0203556			gb:BE671305 /DB_XREF=gi:10031846 /DB_XREF=7e49a11.x1 /CLONE=IMAGE:3285788 /FEA=EST /CNT=7 /TID=Hs.202346.0 /TIER=ConsEnd /STK=1 /UG=Hs.202346 /UG_TITLE=ESTs
ADGRE1	207111_at	0.00173299	2.00122	1.00088	2.00122	up	2.80842	1.48976	2.80842	up	1.65445	0.726348	1.65445	up	1.9547	0.966944	1.9547	up	-0.86902	0.131857	0.620739	-0.142672	0.0979237	2015	Hs.2375	gb:NM_001974.1 /DB_XREF=gi:4503564 /GEN=EMR1 /FEA=FLmRNA /CNT=11 /TID=Hs.2375.0 /TIER=FL /STK=0 /UG=Hs.2375 /LL=2015 /DEF=Homo sapiens egf-like module containing, mucin-like, hormone receptor-like sequence 1 (EMR1), mRNA. /PROD=egf-like module containing, mucin-like, hormonereceptor-like sequence 1 /FL=gb:NM_001974.1
PDLIM5	216804_s_at	0.00174096	1.24105	0.311565	1.24105	up	1.38825	0.473272	1.38825	up	1.31623	0.396414	1.31623	up	1.4185	0.504364	1.4185	up	-0.333534	-0.0219692	0.139737	0.0628793	0.17083	10611	Hs.480311///Hs.732677	gb:AK027217.1 /DB_XREF=gi:10440296 /FEA=mRNA /CNT=1 /TID=Hs.306913.0 /TIER=ConsEnd /STK=0 /UG=Hs.306913 /UG_TITLE=Homo sapiens cDNA: FLJ23564 fis, clone LNG10773 /DEF=Homo sapiens cDNA: FLJ23564 fis, clone LNG10773.
	239070_at	0.00174501	-1.23836	-0.308428	1.23836	down	-1.30744	-0.386747	1.30744	down	-1.18592	-0.246011	1.18592	down	-1.26473	-0.338825	1.26473	down	0.290417	-0.0180104	-0.0963299	0.0444062	-0.0484077		Hs.658357	gb:AI434790 /DB_XREF=gi:4298642 /DB_XREF=ti20d05.x1 /CLONE=IMAGE:2131017 /FEA=EST /CNT=7 /TID=Hs.164259.0 /TIER=ConsEnd /STK=3 /UG=Hs.164259 /UG_TITLE=ESTs
CACTIN	214892_x_at	0.00179486	-1.19485	-0.25683	1.19485	down	-1.15535	-0.208332	1.15535	down	-1.12551	-0.170584	1.12551	down	-1.1443	-0.194471	1.1443	down	0.163748	-0.0930821	-0.044584	-0.00683563	-0.0307224	58509	Hs.128425	gb:BC004262.1 /DB_XREF=gi:13279055 /FEA=mRNA /CNT=13 /TID=Hs.128425.2 /TIER=ConsEnd /STK=0 /UG=Hs.128425 /LL=58509 /UG_GENE=LOC58509 /DEF=Homo sapiens, Similar to cactin, clone IMAGE:3609158, mRNA, partial cds. /PROD=Similar to cactin
KLHL18	1557165_s_at	0.00179901	1.52939	0.612952	1.52939	up	1.56243	0.64379	1.56243	up	1.48354	0.569047	1.48354	up	1.59511	0.673658	1.59511	up	-0.503572	0.10938	0.140218	0.0654752	0.170086	23276	Hs.517946	gb:BM141828 /DB_XREF=gi:17151893 /DB_XREF=if27a02.x1 /CLONE=IMAGE:5677347 /TID=Hs2.287312.1 /CNT=7 /FEA=mRNA /TIER=ConsEnd /STK=1 /UG=Hs.287312 /UG_TITLE=Homo sapiens, clone IMAGE:4081125, mRNA, partial cds
RASEF	1553185_at	0.0018483	1.097	0.133558	1.097	up	1.70693	0.771407	1.70693	up	1.32301	0.403822	1.32301	up	-1.3351	-0.416953	1.3351	down	-0.0841341	0.0494237	0.687273	0.319688	-0.501087	158158	Hs.129136	gb:NM_152573.1 /DB_XREF=gi:22749180 /TID=Hs2.351442.1 /CNT=9 /FEA=FLmRNA /TIER=FL /STK=1 /LL=158158 /UG_GENE=FLJ31614 /UG=Hs.351442 /UG_TITLE=hypothetical protein FLJ31614 /DEF=Homo sapiens hypothetical protein FLJ31614 (FLJ31614), mRNA. /FL=gb:NM_152573.1
ZNF85	206572_x_at	0.00185635	-1.28703	-0.364045	1.28703	down	-1.30839	-0.387793	1.30839	down	-1.38105	-0.465761	1.38105	down	-1.3737	-0.458068	1.3737	down	0.353454	-0.0105909	-0.0343395	-0.112307	-0.104615	7639	Hs.37138	gb:NM_003429.1 /DB_XREF=gi:4508038 /GEN=ZNF85 /FEA=FLmRNA /CNT=15 /TID=Hs.37138.0 /TIER=FL /STK=0 /UG=Hs.37138 /LL=7639 /DEF=Homo sapiens zinc finger protein 85 (HPF4, HTF1) (ZNF85), mRNA. /PROD=zinc finger protein 85 (HPF4, HTF1) /FL=gb:U35376.1 gb:NM_003429.1
LOC100996246	238141_s_at	0.00192364	-1.14707	-0.197955	1.14707	down	-1.22902	-0.297505	1.22902	down	-1.25018	-0.322132	1.25018	down	-1.2911	-0.368604	1.2911	down	0.270362	0.0724062	-0.0271438	-0.0517704	-0.0982425	100996246	Hs.42964	gb:N21233 /DB_XREF=gi:1126403 /DB_XREF=yx42h09.s1 /CLONE=IMAGE:264449 /FEA=EST /CNT=5 /TID=Hs.42964.0 /TIER=ConsEnd /STK=5 /UG=Hs.42964 /UG_TITLE=ESTs
ACER1	1553929_at	0.0019311	-1.08641	-0.119564	1.08641	down	-1.13518	-0.182916	1.13518	down	-1.185	-0.244892	1.185	down	-1.0814	-0.112894	1.0814	down	0.16066	0.0410961	-0.0222559	-0.0842319	0.0477664	125981		gb:NM_133492.1 /DB_XREF=gi:19424127 /GEN=LOC125981 /TID=Hs2.352609.1 /CNT=3 /FEA=FLmRNA /TIER=FL /STK=0 /LL=125981 /UG=Hs.352609 /DEF=Homo sapiens alkaline ceramidase (LOC125981), mRNA. /PROD=alkaline ceramidase /FL=gb:AF347024.1 gb:NM_133492.1
	241458_at	0.00193924	1.19968	0.262649	1.19968	up	1.29342	0.371194	1.29342	up	1.31532	0.395417	1.31532	up	1.27844	0.354381	1.27844	up	-0.315202	-0.0525533	0.0559922	0.0802146	0.0391784		Hs.720176	gb:AI868267 /DB_XREF=gi:5541283 /DB_XREF=tj42h12.x1 /CLONE=IMAGE:2144231 /FEA=EST /CNT=11 /TID=Hs.295848.0 /TIER=ConsEnd /STK=3 /UG=Hs.295848 /UG_TITLE=ESTs
	240131_at	0.00196824	1.89794	0.924435	1.89794	up	2.68541	1.42514	2.68541	up	1.45272	0.538759	1.45272	up	1.74244	0.801108	1.74244	up	-0.640976	0.283459	0.784165	-0.102217	0.160133		Hs.169979	gb:H78083 /DB_XREF=gi:1056172 /DB_XREF=yu83c12.s1 /CLONE=IMAGE:240406 /FEA=EST /CNT=4 /TID=Hs.169979.0 /TIER=ConsEnd /STK=4 /UG=Hs.169979 /UG_TITLE=ESTs
DIRAS3	215506_s_at	0.0019685	1.09396	0.129562	1.09396	up	1.1299	0.176193	1.1299	up	1.13547	0.183295	1.13547	up	1.10016	0.137708	1.10016	up	-0.137073	-0.00751172	0.0391198	0.0462212	0.000634098	9077	Hs.194695	gb:AK021882.1 /DB_XREF=gi:10433168 /FEA=mRNA /CNT=5 /TID=Hs.194695.1 /TIER=ConsEnd /STK=0 /UG=Hs.194695 /LL=9077 /UG_GENE=ARHI /UG_TITLE=ras homolog gene family, member I /DEF=Homo sapiens cDNA FLJ11820 fis, clone HEMBA1006445, highly similar to Homo sapiens putative tumor supressor NOEY2 mRNA.
NAALAD2	1554504_at	0.00199907	-1.00213	-0.00306647	1.00213	down	1.0871	0.12049	1.0871	up	1.01267	0.0181587	1.01267	up	1.01856	0.0265273	1.01856	up	-0.0192042	-0.0222706	0.101286	-0.00104547	0.00732317	10003	Hs.503560	gb:BC038840.1 /DB_XREF=gi:24416528 /TID=Hs2.199292.2 /CNT=10 /FEA=FLmRNA /TIER=FL /STK=1 /LL=10003 /UG_GENE=NAALAD2 /UG=Hs.199292 /DEF=Homo sapiens, Similar to N-acetylated alpha-linked acidic dipeptidase 2, clone MGC:47826 IMAGE:5201306, mRNA, complete cds. /PROD=Similar to N-acetylated alpha-linked acidicdipeptidase 2 /FL=gb:BC038840.1
IRAK1	1555784_s_at	0.0020127	1.09798	0.134851	1.09798	up	-1.05578	-0.078311	1.05578	down	-1.18163	-0.240783	1.18163	down	-1.13257	-0.179606	1.13257	down	0.112211	0.247062	0.0339003	-0.128571	-0.067395	3654	Hs.522819	gb:AF346607.1 /DB_XREF=gi:14485011 /GEN=IRAK /TID=Hs2.182018.3 /CNT=16 /FEA=FLmRNA /TIER=FL /STK=0 /LL=3654 /UG=Hs.182018 /DEF=Homo sapiens interleukin-1 receptor associated kinase 1b (IRAK) mRNA, complete cds, alternatively spliced. /PROD=interleukin-1 receptor associated kinase 1b /FL=gb:AF346607.1
	240914_at	0.00201593	1.00656	0.00943948	1.00656	up	1.08644	0.119611	1.08644	up	1.06214	0.0869675	1.06214	up	1.06416	0.0897184	1.06416	up	-0.0534905	-0.0440511	0.0661204	0.0334769	0.0362279		Hs.547735	gb:AI871627 /DB_XREF=gi:5545676 /DB_XREF=we28e02.x1 /CLONE=IMAGE:2342426 /FEA=EST /CNT=4 /TID=Hs.147457.0 /TIER=ConsEnd /STK=4 /UG=Hs.147457 /UG_TITLE=ESTs
IGHG1	217260_x_at	0.00202682	1.26565	0.339878	1.26565	up	1.06788	0.0947449	1.06788	up	1.08519	0.117946	1.08519	up	1.18577	0.245826	1.18577	up	-0.079717	0.260161	0.0150279	0.0382292	0.166109	3500	Hs.510635///Hs.733514	gb:AJ239383.1 /DB_XREF=gi:4456587 /GEN=IGHV /FEA=mRNA /CNT=1 /TID=Hs.249245.1 /TIER=ConsEnd /STK=0 /UG=Hs.249245 /DEF=Homo sapiens mRNA for immunoglobulin heavy chain variable region, ID 31. /PROD=immunoglobulin heavy chain variable region
VPS35	233864_s_at	0.00203041	1.04323	0.0610576	1.04323	up	1.26708	0.341512	1.26708	up	-1.00126	-0.00181923	1.00126	down	-1.05977	-0.0837464	1.05977	down	-0.0717838	-0.0107262	0.269728	-0.073603	-0.15553	55737	Hs.454528	gb:BG537579 /DB_XREF=gi:13529811 /DB_XREF=602565911F1 /CLONE=IMAGE:4690539 /FEA=mRNA /CNT=2 /TID=Hs.264190.1 /TIER=ConsEnd /STK=0 /UG=Hs.264190 /LL=55737 /UG_GENE=VPS35 /UG_TITLE=vacuolar protein sorting 35 (yeast homolog)
KLF8	230986_at	0.00206547	-1.33796	-0.420035	1.33796	down	-1.37482	-0.459239	1.37482	down	-1.32962	-0.411013	1.32962	down	-1.37198	-0.456262	1.37198	down	0.407426	-0.0126091	-0.0518139	-0.00358765	-0.0488365	11279	Hs.646614	gb:AI821447 /DB_XREF=gi:5440526 /DB_XREF=yp24d10.x5 /CLONE=IMAGE:188371 /FEA=EST /CNT=11 /TID=Hs.141120.0 /TIER=Stack /STK=8 /UG=Hs.141120 /UG_TITLE=ESTs
TNPO1	243324_x_at	0.00211529	1.06125	0.0857644	1.06125	up	1.1069	0.14652	1.1069	up	1.1074	0.147171	1.1074	up	1.11127	0.152211	1.11127	up	-0.0844267	0.00133771	0.0620934	0.0627445	0.0677844	3842		gb:Z38765 /DB_XREF=gi:561157 /DB_XREF=HSC0OD092 /CLONE=c-0od09 /FEA=EST /CNT=4 /TID=Hs.100235.0 /TIER=ConsEnd /STK=3 /UG=Hs.100235 /UG_TITLE=ESTs
PAX6	235795_at	0.00212906	1.03526	0.0499936	1.03526	up	1.11811	0.161065	1.11811	up	1.04039	0.0571199	1.04039	up	1.06695	0.0934985	1.06695	up	-0.0581319	-0.00813839	0.102933	-0.00101209	0.0353665	5080	Hs.270303	gb:AW088232 /DB_XREF=gi:6044037 /DB_XREF=xc99c09.x1 /CLONE=IMAGE:2592400 /FEA=EST /CNT=9 /TID=Hs.65264.0 /TIER=ConsEnd /STK=0 /UG=Hs.65264 /UG_TITLE=ESTs
	244867_at	0.00216619	1.01355	0.0194149	1.01355	up	1.11215	0.153354	1.11215	up	1.08036	0.111517	1.08036	up	1.1044	0.143257	1.1044	up	-0.0876672	-0.0682522	0.0656868	0.0238502	0.0555898			gb:BF223214 /DB_XREF=gi:11130391 /DB_XREF=7q30f03.x1 /CLONE=IMAGE:3699965 /FEA=EST /CNT=6 /TID=Hs.265194.0 /TIER=ConsEnd /STK=3 /UG=Hs.265194 /UG_TITLE=ESTs
PTPN1	217686_at	0.00218258	1.41207	0.497813	1.41207	up	1.33952	0.421715	1.33952	up	1.20996	0.274961	1.20996	up	1.1419	0.191439	1.1419	up	-0.191069	0.306743	0.230645	0.0838912	0.000369263	5770	Hs.417549	gb:BF222916 /DB_XREF=gi:11130093 /DB_XREF=7q25a04.x1 /CLONE=IMAGE:3699342 /FEA=EST /CNT=5 /TID=Hs.331207.0 /TIER=ConsEnd /STK=1 /UG=Hs.331207 /UG_TITLE=ESTs
VPRBP	204377_s_at	0.00220501	-1.03528	-0.0500244	1.03528	down	-1.16166	-0.216192	1.16166	down	-1.15353	-0.206057	1.15353	down	-1.30879	-0.388231	1.30879	down	0.199946	0.149921	-0.0162465	-0.00611101	-0.188286	9730	Hs.716623	gb:NM_014703.1 /DB_XREF=gi:7662315 /GEN=KIAA0800 /FEA=FLmRNA /CNT=50 /TID=Hs.118738.0 /TIER=FL /STK=5 /UG=Hs.118738 /LL=9730 /DEF=Homo sapiens KIAA0800 gene product (KIAA0800), mRNA. /PROD=KIAA0800 gene product /FL=gb:AB018343.1 gb:NM_014703.1
FAAP24	214816_x_at	0.00221189	-1.12854	-0.174458	1.12854	down	-1.15373	-0.206301	1.15373	down	-1.2234	-0.290894	1.2234	down	-1.30243	-0.381203	1.30243	down	0.209972	0.0355139	0.00367096	-0.080922	-0.171232	91442	Hs.579899	gb:BC003535.1 /DB_XREF=gi:13097635 /FEA=mRNA /CNT=17 /TID=Hs.192127.0 /TIER=ConsEnd /STK=0 /UG=Hs.192127 /DEF=Homo sapiens, clone IMAGE:3609326, mRNA, partial cds. /PROD=Unknown (protein for IMAGE:3609326)
ANKRD6	204672_s_at	0.0022402	1.10994	0.150487	1.10994	up	1.51618	0.600442	1.51618	up	1.29031	0.367715	1.29031	up	1.11992	0.163393	1.11992	up	-0.163754	-0.0132677	0.436687	0.20396	-0.000361967	22881	Hs.702213	gb:NM_014942.1 /DB_XREF=gi:7662405 /GEN=KIAA0957 /FEA=FLmRNA /CNT=57 /TID=Hs.30991.0 /TIER=FL /STK=5 /UG=Hs.30991 /LL=22881 /DEF=Homo sapiens KIAA0957 protein (KIAA0957), mRNA. /PROD=KIAA0957 protein /FL=gb:AB023174.1 gb:NM_014942.1
FBXO25	228615_at	0.00224894	-1.37906	-0.463689	1.37906	down	-1.21229	-0.277729	1.21229	down	-1.21802	-0.284543	1.21802	down	-1.31013	-0.389705	1.31013	down	0.291518	-0.17217	0.0137892	0.00697478	-0.098187	26260		gb:AW291761 /DB_XREF=gi:6698397 /DB_XREF=UI-H-BI2-agv-g-02-0-UI.s1 /CLONE=IMAGE:2725803 /FEA=EST /CNT=21 /TID=Hs.13477.0 /TIER=Stack /STK=19 /UG=Hs.13477 /UG_TITLE=ESTs, Weakly similar to 1207289A reverse transcriptase related protein (H.sapiens)
PORCN	219483_s_at	0.0022783	-1.10633	-0.145788	1.10633	down	-1.14618	-0.196828	1.14618	down	-1.23504	-0.304557	1.23504	down	-1.17606	-0.233963	1.17606	down	0.176924	0.0311365	-0.0199038	-0.127633	-0.0570393	64840	Hs.386453	gb:NM_022825.1 /DB_XREF=gi:12642982 /GEN=MG61 /FEA=FLmRNA /CNT=34 /TID=Hs.5326.0 /TIER=FL+Stack /STK=11 /UG=Hs.5326 /LL=64840 /DEF=Homo sapiens porcupine (MG61), mRNA. /PROD=porcupine /FL=gb:AF317059.1 gb:AF317058.1 gb:NM_022825.1
USP36	224979_s_at	0.00228038	-1.1485	-0.199746	1.1485	down	-1.21619	-0.282364	1.21619	down	-1.27239	-0.347545	1.27239	down	-1.34111	-0.423428	1.34111	down	0.243616	0.0438707	-0.0387475	-0.103929	-0.179811	57602	Hs.464243	gb:AU154368 /DB_XREF=gi:11015889 /DB_XREF=AU154368 /CLONE=NT2RP4000927 /FEA=mRNA /CNT=104 /TID=Hs.11387.2 /TIER=Stack /STK=9 /UG=Hs.11387 /LL=57602 /UG_GENE=KIAA1453 /UG_TITLE=KIAA1453 protein
ZNF688	235951_s_at	0.00229983	-1.14722	-0.198141	1.14722	down	-1.11603	-0.158375	1.11603	down	-1.13918	-0.188001	1.13918	down	-1.3331	-0.414782	1.3331	down	0.217585	0.0194445	0.0592109	0.0295844	-0.197197	146542	Hs.301463	gb:BE676210 /DB_XREF=gi:10036751 /DB_XREF=7f25c05.x1 /CLONE=IMAGE:3295688 /FEA=EST /CNT=10 /TID=Hs.134648.0 /TIER=ConsEnd /STK=5 /UG=Hs.134648 /UG_TITLE=ESTs, Highly similar to Unknown gene product (H.sapiens)
	240494_at	0.00230249	1.08775	0.121352	1.08775	up	1.20501	0.269049	1.20501	up	1.16981	0.226275	1.16981	up	1.12864	0.174583	1.12864	up	-0.132234	-0.0108824	0.136814	0.094041	0.0423489		Hs.596370	gb:H69543 /DB_XREF=gi:1039749 /DB_XREF=yr89d03.s1 /CLONE=IMAGE:212453 /FEA=EST /CNT=5 /TID=Hs.19313.0 /TIER=ConsEnd /STK=4 /UG=Hs.19313 /UG_TITLE=ESTs
UNC5CL	231008_at	0.002303	-1.11633	-0.15877	1.11633	down	-1.15582	-0.208916	1.15582	down	-1.14458	-0.194824	1.14458	down	-1.22922	-0.297738	1.22922	down	0.195609	0.0368388	-0.0133072	0.000784762	-0.10213	222643	Hs.158357	gb:AI733001 /DB_XREF=gi:5054114 /DB_XREF=oh04h01.x5 /CLONE=IMAGE:1456849 /FEA=EST /CNT=13 /TID=Hs.158357.0 /TIER=Stack /STK=11 /UG=Hs.158357 /UG_TITLE=ESTs
PICALM	215832_x_at	0.00231113	1.13293	0.18006	1.13293	up	1.25212	0.324378	1.25212	up	1.37003	0.454205	1.37003	up	1.26424	0.338269	1.26424	up	-0.288942	-0.108882	0.0354358	0.165263	0.0493262	8301	Hs.163893	gb:AV722190 /DB_XREF=gi:10824430 /DB_XREF=AV722190 /CLONE=HTBAMF09 /FEA=mRNA /CNT=2 /TID=Hs.7885.2 /TIER=ConsEnd /STK=0 /UG=Hs.7885 /LL=8301 /UG_GENE=PICALM /UG_TITLE=phosphatidylinositol binding clathrin assembly protein
CATSPER2	1561405_s_at	0.0023279	-1.13937	-0.188238	1.13937	down	-1.13729	-0.185601	1.13729	down	-1.13162	-0.17839	1.13162	down	-1.1153	-0.157429	1.1153	down	0.161285	-0.0269531	-0.0243163	-0.0171048	0.0038559	117155	Hs.662284	gb:AW090197 /DB_XREF=gi:6047541 /DB_XREF=xc92d01.x1 /CLONE=IMAGE:2591713 /TID=Hs2.416906.1 /CNT=2 /FEA=mRNA /TIER=ConsEnd /STK=1 /UG=Hs.416906 /UG_TITLE=Homo sapiens cDNA FLJ35999 fis, clone TESTI2015105.
TKT	208699_x_at	0.00232987	1.30318	0.382032	1.30318	up	1.51223	0.596676	1.51223	up	1.49332	0.578527	1.49332	up	1.4258	0.511773	1.4258	up	-0.489275	-0.107243	0.1074	0.0892513	0.0224976	7086	Hs.89643	gb:BF696840 /DB_XREF=gi:11982248 /DB_XREF=602125377F1 /CLONE=IMAGE:4282458 /FEA=FLmRNA /CNT=462 /TID=Hs.89643.0 /TIER=Stack /STK=13 /UG=Hs.89643 /LL=7086 /UG_GENE=TKT /UG_TITLE=transketolase (Wernicke-Korsakoff syndrome) /FL=gb:NM_001064.1 gb:L12711.1 gb:U55017.1
ELMSAN1	235430_at	0.00233175	-1.16221	-0.216867	1.16221	down	-1.15535	-0.208331	1.15535	down	-1.10935	-0.149713	1.10935	down	-1.17366	-0.231017	1.17366	down	0.167102	-0.0497652	-0.0412288	0.0173897	-0.0639144	91748	Hs.594157	gb:AA158537 /DB_XREF=gi:1733348 /DB_XREF=zo72d12.s1 /CLONE=IMAGE:592439 /FEA=EST /CNT=11 /TID=Hs.130323.0 /TIER=ConsEnd /STK=6 /UG=Hs.130323 /UG_TITLE=ESTs, Weakly similar to rapa-2 (H.sapiens)
LINC01091	1563462_at	0.00234347	1.09545	0.131526	1.09545	up	1.02346	0.0334512	1.02346	up	1.01051	0.0150902	1.01051	up	1.04183	0.0591253	1.04183	up	-0.0292362	0.10229	0.004215	-0.014146	0.0298891	285419	Hs.720571	gb:AL833449.1 /DB_XREF=gi:21734091 /TID=Hs2.407113.1 /CNT=1 /FEA=mRNA /TIER=ConsEnd /STK=0 /UG=Hs.407113 /UG_TITLE=Homo sapiens mRNA; cDNA DKFZp686P12109 (from clone DKFZp686P12109) /DEF=Homo sapiens mRNA; cDNA DKFZp686P12109 (from clone DKFZp686P12109).
	236795_at	0.0023448	-1.01836	-0.0262503	1.01836	down	1.09501	0.130949	1.09501	up	-1.00104	-0.0015041	1.00104	down	-1.03816	-0.0540298	1.03816	down	-0.00396232	-0.0302126	0.126986	-0.00546642	-0.0579921		Hs.634209	gb:AU150078 /DB_XREF=gi:11011599 /DB_XREF=AU150078 /CLONE=NT2RP2001444 /FEA=EST /CNT=5 /TID=Hs.97343.0 /TIER=ConsEnd /STK=5 /UG=Hs.97343 /UG_TITLE=ESTs
C19orf24	221587_s_at	0.0023586	-1.17332	-0.230599	1.17332	down	-1.35749	-0.440938	1.35749	down	-1.34421	-0.426762	1.34421	down	-1.14238	-0.192038	1.14238	down	0.290371	0.0597717	-0.150567	-0.136391	0.0983326	55009	Hs.591383	gb:BC000890.1 /DB_XREF=gi:12654144 /FEA=FLmRNA /CNT=49 /TID=Hs.25489.1 /TIER=FL /STK=0 /UG=Hs.25489 /LL=55009 /UG_GENE=FLJ20640 /DEF=Homo sapiens, hypothetical protein FLJ20640, clone MGC:4953, mRNA, complete cds. /PROD=hypothetical protein FLJ20640 /FL=gb:BC000890.1
	230843_at	0.00236114	1.00627	0.00901575	1.00627	up	-1.07066	-0.0984965	1.07066	down	-1.15553	-0.208559	1.15553	down	-1.12655	-0.171909	1.12655	down	0.0993215	0.108337	0.000825087	-0.109238	-0.0725874		Hs.662839	gb:AA482037 /DB_XREF=gi:2209715 /DB_XREF=zu98h06.s1 /CLONE=IMAGE:746075 /FEA=EST /CNT=17 /TID=Hs.23025.0 /TIER=Stack /STK=16 /UG=Hs.23025 /UG_TITLE=ESTs, Weakly similar to ALU5_HUMAN ALU SUBFAMILY SC SEQUENCE CONTAMINATION WARNING ENTRY (H.sapiens)
FAM71B	1555586_at	0.00236235	1.13141	0.178126	1.13141	up	1.08814	0.121863	1.08814	up	1.17908	0.237663	1.17908	up	1.10532	0.144463	1.10532	up	-0.104452	0.0736737	0.0174106	0.133211	0.040011	153745	Hs.666099	gb:AF465821.1 /DB_XREF=gi:18652190 /TID=Hs2.125487.2 /CNT=1 /FEA=FLmRNA /TIER=FL /STK=1 /LL=153745 /UG_GENE=MGC26988 /UG=Hs.125487 /DEF=Homo sapiens unknown protein mRNA, complete cds. /PROD=unknown protein /FL=gb:AF465821.1
FLJ42627	220352_x_at	0.00236492	-1.34147	-0.423811	1.34147	down	-1.15145	-0.203455	1.15145	down	-1.22949	-0.298057	1.22949	down	-1.42574	-0.511709	1.42574	down	0.303268	-0.120543	0.0998131	0.0052109	-0.20844	645644	Hs.597810	gb:NM_024305.1 /DB_XREF=gi:13236535 /GEN=MGC4278 /FEA=FLmRNA /CNT=8 /TID=Hs.318780.0 /TIER=FL /STK=0 /UG=Hs.318780 /LL=79151 /DEF=Homo sapiens hypothetical protein MGC4278 (MGC4278), mRNA. /PROD=hypothetical protein MGC4278 /FL=gb:BC002659.1 gb:NM_024305.1
DNAJC30	239018_at	0.00237912	-1.2157	-0.281789	1.2157	down	-1.24996	-0.321883	1.24996	down	-1.27805	-0.353945	1.27805	down	-1.28791	-0.365035	1.28791	down	0.278891	-0.00289769	-0.0429922	-0.0750544	-0.0861441	84277	Hs.647046	gb:AL045816 /DB_XREF=gi:5433928 /DB_XREF=DKFZp434H196_s1 /CLONE=DKFZp434H196 /FEA=EST /CNT=9 /TID=Hs.153645.0 /TIER=ConsEnd /STK=1 /UG=Hs.153645 /UG_TITLE=ESTs
	233853_at	0.00238372	1.16298	0.217826	1.16298	up	1.10748	0.147285	1.10748	up	1.10949	0.149892	1.10949	up	1.08162	0.113187	1.08162	up	-0.0935894	0.124237	0.0536959	0.0563021	0.0195981		Hs.649716	gb:AL117552.1 /DB_XREF=gi:5912087 /FEA=mRNA /CNT=2 /TID=Hs.282470.0 /TIER=ConsEnd /STK=0 /UG=Hs.282470 /UG_TITLE=Homo sapiens mRNA; cDNA DKFZp564C0170 (from clone DKFZp564C0170) /DEF=Homo sapiens mRNA; cDNA DKFZp564C0170 (from clone DKFZp564C0170).
DDIAS	228281_at	0.00239304	1.51366	0.598039	1.51366	up	1.89651	0.923347	1.89651	up	1.6626	0.733439	1.6626	up	1.47322	0.558969	1.47322	up	-0.584865	0.013174	0.338482	0.148575	-0.0258957	220042	Hs.165607	gb:BF343258 /DB_XREF=gi:11290418 /DB_XREF=602015917F1 /CLONE=IMAGE:4151332 /FEA=EST /CNT=19 /TID=Hs.165607.0 /TIER=Stack /STK=15 /UG=Hs.165607 /UG_TITLE=ESTs
PTGR1	231897_at	0.00239446	1.43568	0.521737	1.43568	up	1.65163	0.723891	1.65163	up	1.75947	0.815144	1.75947	up	2.1165	1.08168	2.1165	up	-0.516477	0.00526094	0.207415	0.298668	0.565206	22949	Hs.584864	gb:AL135787 /DB_XREF=gi:9588110 /FEA=DNA_1 /CNT=21 /TID=Hs.297143.0 /TIER=ConsEnd /STK=5 /UG=Hs.297143 /UG_TITLE=Human DNA sequence from clone RP11-16L21 on chromosome 9. Contains the gene for NADP-dependent leukotriene B4 12-hydroxydehydrogenase, the gene for a novel DnaJ domain protein similar to Drosophila, C. elegans and Arabidopsis predicted proteins, the GNG10 gene for guanine nucleotide bi…
CNNM3	241321_at	0.00241597	-1.35473	-0.438008	1.35473	down	-1.31511	-0.395183	1.31511	down	-1.20283	-0.266429	1.20283	down	-1.25987	-0.333278	1.25987	down	0.335273	-0.102735	-0.0599098	0.0688439	0.00199447	26505		gb:AI379751 /DB_XREF=gi:4189604 /DB_XREF=tc41e07.x1 /CLONE=IMAGE:2067204 /FEA=EST /CNT=4 /TID=Hs.158935.0 /TIER=ConsEnd /STK=4 /UG=Hs.158935 /UG_TITLE=ESTs, Weakly similar to ORF2 (M.musculus)
	243210_at	0.00246095	-1.05992	-0.0839573	1.05992	down	-1.08414	-0.116553	1.08414	down	-1.16231	-0.216994	1.16231	down	-1.21358	-0.279271	1.21358	down	0.11768	0.0337226	0.0011273	-0.0993139	-0.161591		Hs.665333	gb:BF062694 /DB_XREF=gi:10821604 /DB_XREF=7h64a11.x1 /CLONE=IMAGE:3320732 /FEA=EST /CNT=5 /TID=Hs.136798.0 /TIER=ConsEnd /STK=0 /UG=Hs.136798 /UG_TITLE=ESTs
	231494_at	0.00248	1.04092	0.0578573	1.04092	up	1.12108	0.16489	1.12108	up	1.13596	0.183908	1.13596	up	1.09205	0.127039	1.09205	up	-0.0987355	-0.0408781	0.0661548	0.0851729	0.0283033		Hs.667558	gb:BE221394 /DB_XREF=gi:8908712 /DB_XREF=ht95g11.x1 /CLONE=IMAGE:3164900 /FEA=EST /CNT=8 /TID=Hs.160339.0 /TIER=Stack /STK=8 /UG=Hs.160339 /UG_TITLE=ESTs, Weakly similar to ninein (M.musculus)
JADE2	208202_s_at	0.00248911	-1.04917	-0.0692426	1.04917	down	-1.2589	-0.332167	1.2589	down	-1.19699	-0.25941	1.19699	down	-1.16229	-0.216969	1.16229	down	0.180398	0.111155	-0.151769	-0.0790126	-0.0365716	23338	Hs.732155	gb:NM_015288.1 /DB_XREF=gi:13375621 /GEN=KIAA0239 /FEA=FLmRNA /CNT=2 /TID=Hs.9729.0 /TIER=FL /STK=0 /UG=Hs.9729 /LL=23338 /DEF=Homo sapiens KIAA0239 protein (KIAA0239), mRNA. /PROD=KIAA0239 protein /FL=gb:NM_015288.1 gb:BC004292.1
USP34	242647_at	0.00250141	1.2354	0.304975	1.2354	up	1.43585	0.521901	1.43585	up	1.26161	0.335261	1.26161	up	1.313	0.392868	1.313	up	-0.302838	0.00213761	0.219063	0.0324233	0.0900305	9736	Hs.644708	gb:AI148382 /DB_XREF=gi:3676851 /DB_XREF=qc14e09.x1 /CLONE=IMAGE:1709608 /FEA=EST /CNT=5 /TID=Hs.143135.0 /TIER=ConsEnd /STK=0 /UG=Hs.143135 /UG_TITLE=ESTs, Weakly similar to FAFY_HUMAN PROBABLE UBIQUITIN CARBOXYL-TERMINAL HYDROLASE FAF-Y (H.sapiens)
PIH2	234426_x_at	0.00252861	1.04185	0.0591442	1.04185	up	1.06138	0.0859404	1.06138	up	1.04763	0.0671282	1.04763	up	-1.0277	-0.0394175	1.0277	down	-0.0426521	0.016492	0.0432883	0.0244761	-0.0820696	100288139	Hs.545395	gb:AF232217.1 /DB_XREF=gi:7546979 /GEN=PIH2 /FEA=mRNA /CNT=1 /TID=Hs.272408.0 /TIER=ConsEnd /STK=0 /UG=Hs.272408 /DEF=Homo sapiens pregnancy-induced hypertension syndrome-related protein (PIH2) mRNA, partial cds. /PROD=pregnancy-induced hypertension syndrome-relatedprotein
CDYL2	1553647_at	0.00252897	-1.01108	-0.0158979	1.01108	down	1.16162	0.216137	1.16162	up	1.16762	0.223567	1.16762	up	1.21621	0.282397	1.21621	up	-0.1375	-0.153398	0.0786369	0.0860676	0.144897	124359	Hs.373908	gb:NM_152342.1 /DB_XREF=gi:22748742 /TID=Hs2.208837.1 /CNT=6 /FEA=FLmRNA /TIER=FL /STK=1 /LL=124359 /UG_GENE=FLJ38866 /UG=Hs.208837 /UG_TITLE=hypothetical protein FLJ38866 /DEF=Homo sapiens hypothetical protein FLJ38866 (FLJ38866), mRNA. /FL=gb:NM_152342.1
	216757_at	0.00255465	1.12931	0.175437	1.12931	up	1.30671	0.385935	1.30671	up	1.19248	0.253959	1.19248	up	1.24037	0.310772	1.24037	up	-0.184591	-0.00915427	0.201344	0.0693682	0.126181		Hs.612892	gb:AK024995.1 /DB_XREF=gi:10437426 /FEA=mRNA /CNT=1 /TID=Hs.306739.0 /TIER=ConsEnd /STK=0 /UG=Hs.306739 /UG_TITLE=Homo sapiens cDNA: FLJ21342 fis, clone COL02673 /DEF=Homo sapiens cDNA: FLJ21342 fis, clone COL02673.
FAM66C	1570396_at	0.00259387	-1.08742	-0.120915	1.08742	down	-1.00211	-0.00303995	1.00211	down	-1.06018	-0.0843055	1.06018	down	-1.0875	-0.121019	1.0875	down	0.0651304	-0.055785	0.0620905	-0.0191751	-0.0558889	440078	Hs.512257	gb:BC034777.1 /DB_XREF=gi:22902165 /TID=Hs2.88121.2 /CNT=1 /FEA=mRNA /TIER=ConsEnd /STK=0 /UG=Hs.88121 /UG_TITLE=Homo sapiens cDNA FLJ38982 fis, clone NT2RI2005239. /DEF=Homo sapiens, clone IMAGE:5174164, mRNA.
B3GALT6	225733_at	0.00260254	-1.38904	-0.474092	1.38904	down	-1.32286	-0.403656	1.32286	down	-1.28048	-0.35669	1.28048	down	-1.33393	-0.415678	1.33393	down	0.32854	-0.145552	-0.0751153	-0.0281494	-0.0871374	126792	Hs.284284	gb:AI890557 /DB_XREF=gi:5595721 /DB_XREF=wm87c08.x1 /CLONE=IMAGE:2442926 /FEA=EST /CNT=80 /TID=Hs.284284.0 /TIER=Stack /STK=36 /UG=Hs.284284 /UG_TITLE=ESTs, Highly similar to beta-1,3-N-acetylglucosaminyltransferase (H.sapiens)
	216769_x_at	0.00261093	-1.00878	-0.012608	1.00878	down	1.05682	0.0797365	1.05682	up	1.06399	0.0894808	1.06399	up	-1.06747	-0.0942012	1.06747	down	-0.0292697	-0.0418777	0.0504668	0.0602111	-0.123471		Hs.677992	gb:AK025180.1 /DB_XREF=gi:10437643 /FEA=mRNA /CNT=1 /TID=Hs.306779.0 /TIER=ConsEnd /STK=0 /UG=Hs.306779 /UG_TITLE=Homo sapiens cDNA: FLJ21527 fis, clone COL05961 /DEF=Homo sapiens cDNA: FLJ21527 fis, clone COL05961.
	243518_at	0.00268453	-1.27525	-0.350784	1.27525	down	-1.20458	-0.268527	1.20458	down	-1.28879	-0.366012	1.28879	down	-1.32701	-0.408177	1.32701	down	0.344437	-0.00634662	0.0759105	-0.0215746	-0.0637396			gb:BF195614 /DB_XREF=gi:11082688 /DB_XREF=7n85g05.x1 /CLONE=IMAGE:3571401 /FEA=EST /CNT=3 /TID=Hs.289797.0 /TIER=ConsEnd /STK=3 /UG=Hs.289797 /UG_TITLE=ESTs
SLC16A3	202855_s_at	0.00269196	2.82322	1.49734	2.82322	up	3.16867	1.66388	3.16867	up	3.07488	1.62053	3.07488	up	3.39151	1.76193	3.39151	up	-1.63238	-0.135035	0.0315005	-0.0118451	0.12955	9123	Hs.500761	gb:AL513917 /DB_XREF=gi:12777411 /DB_XREF=AL513917 /CLONE=CL0BA006ZD09 (3 prime) /FEA=FLmRNA /CNT=188 /TID=Hs.85838.0 /TIER=Stack /STK=68 /UG=Hs.85838 /LL=9123 /UG_GENE=SLC16A3 /UG_TITLE=solute carrier family 16 (monocarboxylic acid transporters), member 3 /FL=gb:U81800.1 gb:NM_004207.1
ZNF536	239340_at	0.0027369	-1.04262	-0.0602192	1.04262	down	1.07646	0.106289	1.07646	up	1.07516	0.104545	1.07516	up	1.03675	0.0520618	1.03675	up	-0.0402275	-0.100447	0.0660618	0.0643177	0.0118343	9745		gb:R20647 /DB_XREF=gi:775428 /DB_XREF=yf59e02.s1 /CLONE=IMAGE:26199 /FEA=EST /CNT=9 /TID=Hs.240905.0 /TIER=ConsEnd /STK=4 /UG=Hs.240905 /UG_TITLE=ESTs
ZNF783	221876_at	0.00276744	-1.28835	-0.365527	1.28835	down	-1.27193	-0.347021	1.27193	down	-1.22816	-0.296503	1.22816	down	-1.20145	-0.264776	1.20145	down	0.244956	-0.120571	-0.102065	-0.0515466	-0.0198198	100289678	Hs.490512	gb:AU151157 /DB_XREF=gi:11012678 /DB_XREF=AU151157 /CLONE=NT2RP2004523 /FEA=mRNA /CNT=67 /TID=Hs.14217.0 /TIER=Stack /STK=35 /UG=Hs.14217 /LL=55537 /UG_GENE=DKFZp762P2111 /UG_TITLE=hypothetical protein DKFZp762P2111
TSR1	218155_x_at	0.00278907	-1.18159	-0.240733	1.18159	down	-1.07875	-0.109364	1.07875	down	-1.22766	-0.295916	1.22766	down	-1.39384	-0.479065	1.39384	down	0.208096	-0.0326368	0.0987318	-0.0878204	-0.270969	55720	Hs.388170	gb:AK026565.1 /DB_XREF=gi:10439447 /FEA=FLmRNA /CNT=111 /TID=Hs.204501.0 /TIER=ConsEnd /STK=0 /UG=Hs.204501 /LL=55720 /UG_GENE=FLJ10534 /UG_TITLE=hypothetical protein FLJ10534 /DEF=Homo sapiens cDNA: FLJ22912 fis, clone KAT06132. /FL=gb:NM_018128.1
TDH	1553494_at	0.00283511	1.0349	0.0494915	1.0349	up	1.012	0.0172118	1.012	up	1.08609	0.119139	1.08609	up	1.0371	0.0525534	1.0371	up	-0.0470929	0.00239854	-0.0298811	0.0720456	0.00546045	157739	Hs.583896	gb:NM_152566.1 /DB_XREF=gi:22749174 /TID=Hs2.381360.1 /CNT=2 /FEA=FLmRNA /TIER=FL /STK=1 /LL=157739 /UG_GENE=FLJ25033 /UG=Hs.381360 /UG_TITLE=hypothetical protein FLJ25033 /DEF=Homo sapiens hypothetical protein FLJ25033 (FLJ25033), mRNA. /FL=gb:NM_152566.1
	220719_at	0.00285664	-1.03154	-0.0448036	1.03154	down	-1.06439	-0.0900218	1.06439	down	-1.14835	-0.199561	1.14835	down	-1.21105	-0.276261	1.21105	down	0.144112	0.0993079	0.0540898	-0.0554495	-0.132149			gb:NM_025012.1 /DB_XREF=gi:13376532 /GEN=FLJ13769 /FEA=FLmRNA /CNT=4 /TID=Hs.287594.0 /TIER=FL /STK=0 /UG=Hs.287594 /LL=80079 /DEF=Homo sapiens hypothetical protein FLJ13769 (FLJ13769), mRNA. /PROD=hypothetical protein FLJ13769 /FL=gb:NM_025012.1
CNTLN	1559005_s_at	0.00285877	1.09211	0.127122	1.09211	up	1.28571	0.362561	1.28571	up	1.00948	0.0136114	1.00948	up	-1.04819	-0.0679031	1.04819	down	-0.0529938	0.0741286	0.309567	-0.0393824	-0.120897	54875	Hs.435381	gb:AK098502.1 /DB_XREF=gi:21758527 /TID=Hs2.210505.1 /CNT=9 /FEA=mRNA /TIER=ConsEnd /STK=0 /UG=Hs.210505 /UG_TITLE=Homo sapiens cDNA FLJ25636 fis, clone STM04338. /DEF=Homo sapiens cDNA FLJ25636 fis, clone STM04338.
CD5	230489_at	0.00289302	-1.44987	-0.53592	1.44987	down	-1.74062	-0.799605	1.74062	down	-1.51278	-0.597204	1.51278	down	-1.24401	-0.315	1.24401	down	0.52518	-0.0107403	-0.274425	-0.0720239	0.21018	921	Hs.58685	gb:AI797836 /DB_XREF=gi:5363393 /DB_XREF=wh79f02.x1 /CLONE=IMAGE:2386971 /FEA=EST /CNT=15 /TID=Hs.58685.1 /TIER=Stack /STK=9 /UG=Hs.58685 /LL=921 /UG_GENE=CD5 /UG_TITLE=CD5 antigen (p56-62)
	1558672_at	0.00291181	1.08168	0.113274	1.08168	up	1.16739	0.223281	1.16739	up	1.07916	0.109912	1.07916	up	1.07342	0.102208	1.07342	up	-0.0840018	0.0292727	0.13928	0.0259105	0.0182064		Hs.588813	gb:BC040734.1 /DB_XREF=gi:26251903 /TID=Hs2.382204.1 /CNT=7 /FEA=mRNA /TIER=ConsEnd /STK=0 /UG=Hs.382204 /UG_TITLE=Homo sapiens, clone IMAGE:5199023, mRNA /DEF=Homo sapiens, clone IMAGE:5198998, mRNA.
DDX24	200702_s_at	0.00292057	-1.21017	-0.275211	1.21017	down	-1.49435	-0.57952	1.49435	down	-1.4701	-0.555912	1.4701	down	-1.31264	-0.392473	1.31264	down	0.343004	0.0677932	-0.236516	-0.212908	-0.0494687	57062	Hs.510328	gb:BG421209 /DB_XREF=gi:13327715 /DB_XREF=602451696F1 /CLONE=IMAGE:4590215 /FEA=FLmRNA /CNT=398 /TID=Hs.155986.0 /TIER=Stack /STK=13 /UG=Hs.155986 /LL=57062 /UG_GENE=DDX24 /UG_TITLE=DEADH (Asp-Glu-Ala-AspHis) box polypeptide 24 /FL=gb:NM_020414.2 gb:AL136886.1 gb:AF214731.1
LOC101928401	1569486_at	0.00293805	-1.01934	-0.0276358	1.01934	down	1.04876	0.0686891	1.04876	up	1.0498	0.0701156	1.0498	up	1.12941	0.175576	1.12941	up	-0.0520981	-0.0797339	0.016591	0.0180175	0.123478	101928401	Hs.385614	gb:BC035176.1 /DB_XREF=gi:23272516 /TID=Hs2.385614.1 /CNT=4 /FEA=mRNA /TIER=ConsEnd /STK=0 /UG=Hs.385614 /UG_TITLE=Homo sapiens, clone IMAGE:5266012, mRNA /DEF=Homo sapiens, clone IMAGE:5266012, mRNA.
SSBP3-AS1	232469_x_at	0.00293934	-1.21548	-0.281521	1.21548	down	-1.08725	-0.120679	1.08725	down	-1.13938	-0.188244	1.13938	down	-1.22915	-0.297656	1.22915	down	0.182245	-0.0992768	0.0615656	-0.00599886	-0.115412	619518	Hs.591438	gb:AK023883.1 /DB_XREF=gi:10435955 /FEA=mRNA /CNT=6 /TID=Hs.288801.0 /TIER=ConsEnd /STK=0 /UG=Hs.288801 /UG_TITLE=Homo sapiens cDNA FLJ13821 fis, clone THYRO1000484 /DEF=Homo sapiens cDNA FLJ13821 fis, clone THYRO1000484.
AGAP11///AGAP4///AGAP6///AGAP7P///CTGLF12P///LOC101060581///LOC105369258	221850_x_at	0.00294043	-1.27454	-0.349977	1.27454	down	-1.34386	-0.426384	1.34386	down	-1.27864	-0.354613	1.27864	down	-1.37413	-0.458523	1.37413	down	0.24068	-0.109296	-0.185703	-0.113933	-0.217842	119016///119385///414189///414224///653268///101060581///105369258	Hs.511787///Hs.536158///Hs.536192///Hs.656384	gb:AI826075 /DB_XREF=gi:5446746 /DB_XREF=wk28c04.x1 /CLONE=IMAGE:2413638 /FEA=EST /CNT=62 /TID=Hs.297681.5 /TIER=Stack /STK=33 /UG=Hs.297681 /LL=5265 /UG_GENE=SERPINA1 /UG_TITLE=serine (or cysteine) proteinase inhibitor, clade A (alpha-1 antiproteinase, antitrypsin), member 1
	235336_at	0.00295527	1.05923	0.0830118	1.05923	up	-1.00152	-0.00218692	1.00152	down	1.06492	0.0907403	1.06492	up	1.12205	0.166133	1.12205	up	-0.0370899	0.0459219	-0.0392769	0.0536503	0.129043		Hs.656801	gb:BG436225 /DB_XREF=gi:13342731 /DB_XREF=602508642F1 /CLONE=IMAGE:4605659 /FEA=EST /CNT=28 /TID=Hs.33355.0 /TIER=ConsEnd /STK=0 /UG=Hs.33355 /UG_TITLE=ESTs
	242240_at	0.00296378	-1.15769	-0.211254	1.15769	down	-1.08072	-0.11199	1.08072	down	-1.2009	-0.264115	1.2009	down	-1.20819	-0.272853	1.20819	down	0.173255	-0.0379982	0.0612649	-0.0908596	-0.099598		Hs.663018	gb:AI805700 /DB_XREF=gi:5392266 /DB_XREF=tx15h06.x1 /CLONE=IMAGE:2269307 /FEA=EST /CNT=5 /TID=Hs.310616.0 /TIER=ConsEnd /STK=1 /UG=Hs.310616 /UG_TITLE=ESTs
RAB3GAP1	239527_at	0.00297159	1.02838	0.0403768	1.02838	up	1.10056	0.138233	1.10056	up	1.11586	0.158157	1.11586	up	1.13332	0.180556	1.13332	up	-0.0831495	-0.0427727	0.0550835	0.0750072	0.0974065	22930	Hs.306327	gb:BF103605 /DB_XREF=gi:10886131 /DB_XREF=601647070F1 /CLONE=IMAGE:3931528 /FEA=EST /CNT=7 /TID=Hs.167549.0 /TIER=ConsEnd /STK=0 /UG=Hs.167549 /UG_TITLE=ESTs, Highly similar to KIAA0066 (H.sapiens)
WHAMMP2	1560662_s_at	0.00300179	-1.30713	-0.386408	1.30713	down	-1.21174	-0.277075	1.21174	down	-1.30517	-0.384236	1.30517	down	-1.63048	-0.705301	1.63048	down	0.394671	0.00826354	0.117596	0.010435	-0.31063	440253	Hs.558967	gb:AL833132.1 /DB_XREF=gi:21733754 /TID=Hs2.379846.1 /CNT=4 /FEA=mRNA /TIER=ConsEnd /STK=0 /UG=Hs.379846 /UG_TITLE=Homo sapiens mRNA; cDNA DKFZp313L2232 (from clone DKFZp313L2232) /DEF=Homo sapiens mRNA; cDNA DKFZp313L2232 (from clone DKFZp313L2232).
ANKRD23	230384_at	0.00301441	-1.14749	-0.198482	1.14749	down	-1.2689	-0.343573	1.2689	down	-1.16882	-0.225058	1.16882	down	-1.15963	-0.213667	1.15963	down	0.2437	0.0452182	-0.0998731	0.0186424	0.0300332	200539		gb:AI866797 /DB_XREF=gi:5530828 /DB_XREF=tz53c09.x1 /CLONE=IMAGE:2292304 /FEA=EST /CNT=9 /TID=Hs.146146.0 /TIER=Stack /STK=9 /UG=Hs.146146 /UG_TITLE=ESTs
UBE2I	1558088_a_at	0.00304801	-1.17247	-0.229548	1.17247	down	-1.25421	-0.326779	1.25421	down	-1.24763	-0.319189	1.24763	down	-1.43397	-0.520015	1.43397	down	0.313668	0.0841196	-0.013111	-0.00552155	-0.206348	7329		gb:AK093616.1 /DB_XREF=gi:21752528 /TID=Hs2.302903.1 /CNT=13 /FEA=mRNA /TIER=ConsEnd /STK=0 /UG=Hs.302903 /UG_TITLE=Homo sapiens cDNA FLJ36297 fis, clone THYMU2004336, highly similar to UBIQUITIN-CONJUGATING ENZYME E2-18 KDA (EC 6.3.2.19). /DEF=Homo sapiens cDNA FLJ36297 fis, clone THYMU2004336, highly similar to UBIQUITIN-CONJUGATING ENZYME E2-18 KDA (EC 6.3.2.19).
ELMOD2	233912_x_at	0.00307011	-1.13702	-0.185256	1.13702	down	1.00429	0.00618041	1.00429	up	-1.0647	-0.0904411	1.0647	down	-1.22938	-0.297932	1.22938	down	0.104377	-0.0808792	0.110557	0.0139355	-0.193556	255520	Hs.677038	gb:AK021525.1 /DB_XREF=gi:10432722 /FEA=mRNA /CNT=2 /TID=Hs.288888.0 /TIER=ConsEnd /STK=0 /UG=Hs.288888 /UG_TITLE=Homo sapiens cDNA FLJ11463 fis, clone HEMBA1001608 /DEF=Homo sapiens cDNA FLJ11463 fis, clone HEMBA1001608.
SMPDL3A	213624_at	0.00307099	2.02554	1.0183	2.02554	up	2.9897	1.58	2.9897	up	1.70205	0.767272	1.70205	up	1.80983	0.855852	1.80983	up	-0.750939	0.267365	0.829061	0.0163328	0.104913	10924	Hs.486357	gb:AA873600 /DB_XREF=gi:2969722 /DB_XREF=ob12a02.s1 /CLONE=IMAGE:1323434 /FEA=mRNA /CNT=36 /TID=Hs.42945.0 /TIER=Stack /STK=23 /UG=Hs.42945 /LL=10924 /UG_GENE=ASM3A /UG_TITLE=acid sphingomyelinase-like phosphodiesterase
IMPG2	241856_at	0.00308075	-1.0748	-0.104064	1.0748	down	-1.03662	-0.0518926	1.03662	down	1.05318	0.0747586	1.05318	up	1.06317	0.0883663	1.06317	up	0.00933211	-0.0947316	-0.0425605	0.0840907	0.0976984	50939	Hs.209249	gb:AA063037 /DB_XREF=gi:1556580 /DB_XREF=zf67c02.s1 /CLONE=IMAGE:381986 /FEA=EST /CNT=5 /TID=Hs.66803.0 /TIER=ConsEnd /STK=3 /UG=Hs.66803 /UG_TITLE=ESTs
CABIN1	37652_at	0.00309861	-1.23527	-0.304823	1.23527	down	-1.34964	-0.432573	1.34964	down	-1.2159	-0.282023	1.2159	down	-1.3506	-0.433603	1.3506	down	0.342628	0.037805	-0.0899447	0.0606052	-0.0909749	23523	Hs.517478	Cluster Incl. AB002328:Human mRNA for KIAA0330 gene, partial cds /cds=(0,5710) /gb=AB002328 /gi=2224600 /ug=Hs.7840 /len=6143
	1561135_at	0.00311827	1.1248	0.169667	1.1248	up	1.13845	0.187069	1.13845	up	1.15738	0.210865	1.15738	up	1.13405	0.181484	1.13405	up	-0.145502	0.0241649	0.0415672	0.0653632	0.0359818		Hs.684721	gb:AF085980.1 /DB_XREF=gi:3483325 /TID=Hs2.384642.1 /CNT=3 /FEA=mRNA /TIER=ConsEnd /STK=1 /UG=Hs.384642 /UG_TITLE=Homo sapiens full length insert cDNA clone YT88G03 /DEF=Homo sapiens full length insert cDNA clone YT88G03.
MAP4K1	214219_x_at	0.00312474	-1.26021	-0.333659	1.26021	down	-1.68596	-0.753571	1.68596	down	-1.52685	-0.610557	1.52685	down	-1.37694	-0.461468	1.37694	down	0.344912	0.0112532	-0.408659	-0.265645	-0.116556	11184	Hs.95424	gb:BE646618 /DB_XREF=gi:9970929 /DB_XREF=7e91b08.x1 /CLONE=IMAGE:3292503 /FEA=EST /CNT=15 /TID=Hs.86575.1 /TIER=Stack /STK=9 /UG=Hs.86575 /LL=11184 /UG_GENE=MAP4K1 /UG_TITLE=mitogen-activated protein kinase kinase kinase kinase 1
HIST1H2BK	209806_at	0.00312873	1.37309	0.457425	1.37309	up	1.30129	0.379942	1.30129	up	1.46779	0.553649	1.46779	up	1.52643	0.610164	1.52643	up	-0.449083	0.00834158	-0.0691413	0.104566	0.161081	85236	Hs.437275	gb:BC000893.1 /DB_XREF=gi:12654150 /FEA=FLmRNA /CNT=48 /TID=Hs.247817.0 /TIER=FL /STK=0 /UG=Hs.247817 /LL=8339 /UG_GENE=H2BFA /DEF=Homo sapiens, H2B histone family, member A, clone MGC:5132, mRNA, complete cds. /PROD=H2B histone family, member A /FL=gb:BC000893.1
TTC9	213174_at	0.00313476	-1.34723	-0.429994	1.34723	down	-1.37209	-0.456371	1.37209	down	-1.43222	-0.518256	1.43222	down	-1.4045	-0.490054	1.4045	down	0.401617	-0.0283762	-0.0547537	-0.116639	-0.0884367	23508	Hs.79170	gb:BE675549 /DB_XREF=gi:10036090 /DB_XREF=7f23c07.x1 /CLONE=IMAGE:3295500 /FEA=mRNA /CNT=84 /TID=Hs.79170.0 /TIER=Stack /STK=8 /UG=Hs.79170 /LL=23508 /UG_GENE=KIAA0227 /UG_TITLE=KIAA0227 protein
ZNF394	243024_at	0.00317812	1.23086	0.299666	1.23086	up	1.19712	0.259574	1.19712	up	1.33215	0.413759	1.33215	up	1.51748	0.601682	1.51748	up	-0.290579	0.00908751	-0.031005	0.12318	0.311103	84124		gb:AI024029 /DB_XREF=gi:3239073 /DB_XREF=ow70f06.s1 /CLONE=IMAGE:1652195 /FEA=EST /CNT=6 /TID=Hs.293707.1 /TIER=ConsEnd /STK=2 /UG=Hs.293707 /UG_TITLE=ESTs, Weakly similar to I38598 zinc finger protein ZNF132 (H.sapiens)
VPRBP	226477_at	0.00318969	-1.26355	-0.337483	1.26355	down	-1.26711	-0.341536	1.26711	down	-1.26554	-0.339751	1.26554	down	-1.19644	-0.25875	1.19644	down	0.279221	-0.0582622	-0.0623151	-0.0605298	0.0204713	9730	Hs.716623	gb:AK023239.1 /DB_XREF=gi:10435083 /FEA=mRNA /CNT=55 /TID=Hs.118738.2 /TIER=Stack /STK=13 /UG=Hs.118738 /LL=9730 /UG_GENE=KIAA0800 /UG_TITLE=KIAA0800 gene product /DEF=Homo sapiens cDNA FLJ13177 fis, clone NT2RP3003870, highly similar to Homo sapiens mRNA for KIAA0800 protein.
CBX7	212914_at	0.00319436	-1.27516	-0.350673	1.27516	down	-1.38887	-0.473908	1.38887	down	-1.13707	-0.185319	1.13707	down	-1.39319	-0.478389	1.39319	down	0.350425	-0.000248114	-0.123483	0.165106	-0.127964	23492	Hs.356416	gb:AV648364 /DB_XREF=gi:9869378 /DB_XREF=AV648364 /CLONE=GLCBIF04 /FEA=EST /CNT=78 /TID=Hs.152151.1 /TIER=Stack /STK=34 /UG=Hs.152151 /LL=8502 /UG_GENE=PKP4 /UG_TITLE=plakophilin 4
MIR503///MIR503HG	227488_at	0.00319437	1.30605	0.385208	1.30605	up	1.16682	0.222582	1.16682	up	1.33348	0.415197	1.33348	up	1.35078	0.433788	1.35078	up	-0.287878	0.09733	-0.0652963	0.12732	0.14591	84848///574506		gb:AV728999 /DB_XREF=gi:10838420 /DB_XREF=AV728999 /CLONE=HTCALG04 /FEA=EST /CNT=60 /TID=Hs.17649.0 /TIER=Stack /STK=41 /UG=Hs.17649 /UG_TITLE=ESTs
CTNNA3	236576_at	0.00320218	1.01797	0.0256878	1.01797	up	1.02409	0.0343459	1.02409	up	1.03808	0.0539169	1.03808	up	1.15506	0.207964	1.15506	up	-0.0352007	-0.00951288	-0.000854797	0.0187162	0.172763	29119	Hs.660362	gb:N63005 /DB_XREF=gi:1210834 /DB_XREF=yy69a11.s1 /CLONE=IMAGE:278780 /FEA=EST /CNT=9 /TID=Hs.21375.0 /TIER=ConsEnd /STK=7 /UG=Hs.21375 /UG_TITLE=ESTs
TP53BP1	213266_at	0.0032037	-1.29602	-0.374091	1.29602	down	-1.21713	-0.283481	1.21713	down	-1.14459	-0.194833	1.14459	down	-1.24858	-0.320284	1.24858	down	0.297095	-0.0769956	0.0136145	0.102262	-0.023189	7158		gb:BF592982 /DB_XREF=gi:11685306 /DB_XREF=7j97g10.x1 /CLONE=IMAGE:3442771 /FEA=EST /CNT=66 /TID=Hs.20621.1 /TIER=Stack /STK=42 /UG=Hs.20621 /LL=27229 /UG_GENE=76P /UG_TITLE=gamma tubulin ring complex protein (76p gene)
MSMO1	209146_at	0.0032677	1.75945	0.815123	1.75945	up	1.38955	0.474619	1.38955	up	1.25061	0.32263	1.25061	up	1.56735	0.648331	1.56735	up	-0.44744	0.367684	0.0271795	-0.124809	0.200891	6307	Hs.105269	gb:AV704962 /DB_XREF=gi:10722273 /DB_XREF=AV704962 /CLONE=ADBALE09 /FEA=FLmRNA /CNT=184 /TID=Hs.239926.0 /TIER=Stack /STK=27 /UG=Hs.239926 /LL=6307 /UG_GENE=SC4MOL /UG_TITLE=sterol-C4-methyl oxidase-like /FL=gb:NM_006745.2 gb:U60205.1 gb:U93162.1
LINC00441	1559543_at	0.00327349	-1.10455	-0.143464	1.10455	down	-1.07046	-0.098234	1.07046	down	-1.12108	-0.164885	1.12108	down	-1.12423	-0.168935	1.12423	down	0.0923052	-0.0511586	-0.00592877	-0.07258	-0.0766295	100862704	Hs.374221	gb:BC039553.1 /DB_XREF=gi:24659199 /TID=Hs2.374221.1 /CNT=6 /FEA=mRNA /TIER=ConsEnd /STK=0 /UG=Hs.374221 /UG_TITLE=Homo sapiens, clone IMAGE:5787947, mRNA /DEF=Homo sapiens, clone IMAGE:5787947, mRNA.
	233330_s_at	0.0033231	-1.09601	-0.132267	1.09601	down	1.55625	0.638069	1.55625	up	1.01406	0.0201486	1.01406	up	-1.17359	-0.230934	1.17359	down	0.0937098	-0.0385569	0.731779	0.113858	-0.137224		Hs.637324	gb:AY010114.1 /DB_XREF=gi:13378203 /FEA=mRNA /CNT=4 /TID=Hs.326756.0 /TIER=ConsEnd /STK=0 /UG=Hs.326756 /UG_TITLE=Homo sapiens unknown mRNA sequence /DEF=Homo sapiens unknown mRNA sequence.
	234382_x_at	0.00333636	-1.04717	-0.0664985	1.04717	down	-1.0277	-0.0394166	1.0277	down	-1.04112	-0.0581355	1.04112	down	-1.1601	-0.214244	1.1601	down	0.0822794	0.0157809	0.0428628	0.0241439	-0.131965			gb:X55777 /DB_XREF=gi:288143 /FEA=DNA_1 /CNT=1 /TID=Hs.247966.0 /TIER=ConsEnd /STK=0 /UG=Hs.247966 /UG_TITLE=H.sapiens Mahlavu hepatocellular carcinoma hhc(M) DNA /DEF=H.sapiens Mahlavu hepatocellular carcinoma hhc(M) DNA
SCYL2	221220_s_at	0.00333846	1.31663	0.396845	1.31663	up	1.51792	0.602092	1.51792	up	1.36725	0.451276	1.36725	up	1.49493	0.580083	1.49493	up	-0.404918	-0.00807317	0.197174	0.0463576	0.175164	55681	Hs.506481	gb:NM_017988.1 /DB_XREF=gi:8922217 /GEN=FLJ10074 /FEA=FLmRNA /CNT=2 /TID=Hs.71573.0 /TIER=FL /STK=0 /UG=Hs.71573 /LL=55681 /DEF=Homo sapiens hypothetical protein FLJ10074 (FLJ10074), mRNA. /PROD=hypothetical protein FLJ10074 /FL=gb:NM_017988.1
	1556983_a_at	0.00335807	-1.02388	-0.0340476	1.02388	down	1.13971	0.188665	1.13971	up	1.08953	0.123707	1.08953	up	1.06371	0.0890988	1.06371	up	-0.0646613	-0.0987089	0.124004	0.0590453	0.0244375		Hs.659029	gb:AF075116.1 /DB_XREF=gi:3377657 /TID=Hs2.208511.1 /CNT=3 /FEA=mRNA /TIER=ConsEnd /STK=2 /UG=Hs.208511 /UG_TITLE=Homo sapiens full length insert cDNA YW02F03 /DEF=Homo sapiens full length insert cDNA YW02F03.
	237034_at	0.0033613	-1.09754	-0.134275	1.09754	down	-1.15378	-0.206365	1.15378	down	1.00642	0.00922999	1.00642	up	1.04549	0.0641838	1.04549	up	0.0969502	-0.0373245	-0.109415	0.10618	0.161134			gb:AW002876 /DB_XREF=gi:5849792 /DB_XREF=wr02a10.x1 /CLONE=IMAGE:2480346 /FEA=EST /CNT=8 /TID=Hs.150608.0 /TIER=ConsEnd /STK=5 /UG=Hs.150608 /UG_TITLE=ESTs
PLN	204938_s_at	0.00338912	1.06607	0.0923025	1.06607	up	1.05498	0.0772171	1.05498	up	1.05916	0.0829151	1.05916	up	1.10448	0.143364	1.10448	up	-0.0608825	0.03142	0.0163346	0.0220326	0.0824819	5350	Hs.170839	gb:M60411.1 /DB_XREF=gi:190018 /GEN=PLB /FEA=FLmRNA /CNT=213 /TID=Hs.85050.0 /TIER=FL /STK=0 /UG=Hs.85050 /LL=5350 /DEF=Human phospholamban mRNA, complete cds. /PROD=phospholamban /FL=gb:NM_002667.1 gb:BC005269.1 gb:M60411.1 gb:M63603.1
SGF29	48117_at	0.00341123	-1.07041	-0.0981652	1.07041	down	-1.25607	-0.32892	1.25607	down	-1.1788	-0.237321	1.1788	down	-1.06008	-0.0841768	1.06008	down	0.15521	0.0570446	-0.17371	-0.0821108	0.071033	112869	Hs.655476	Cluster Incl. AA160496:zo73a03.s1 Homo sapiens cDNA, 3 end /clone=IMAGE-592492 /clone_end=3' /gb=AA160496 /gi=1735863 /ug=Hs.110407 /len=542
ABCG1	230913_at	0.00342736	-1.44029	-0.526356	1.44029	down	-1.46913	-0.554959	1.46913	down	-1.28039	-0.356588	1.28039	down	-1.40935	-0.495028	1.40935	down	0.488346	-0.0380097	-0.0666134	0.131758	-0.00668187	9619		gb:BE674309 /DB_XREF=gi:10034850 /DB_XREF=7d78a09.x1 /CLONE=IMAGE:3279064 /FEA=EST /CNT=11 /TID=Hs.59525.0 /TIER=Stack /STK=11 /UG=Hs.59525 /UG_TITLE=ESTs
FKBP15	242574_at	0.00342824	1.11431	0.156152	1.11431	up	1.14759	0.198613	1.14759	up	1.30483	0.383865	1.30483	up	1.23821	0.308257	1.23821	up	-0.201338	-0.0451863	-0.0027247	0.182526	0.106919	23307	Hs.522351	gb:AW340329 /DB_XREF=gi:6836955 /DB_XREF=hc95h06.x1 /CLONE=IMAGE:2907803 /FEA=EST /CNT=4 /TID=Hs.126089.0 /TIER=ConsEnd /STK=3 /UG=Hs.126089 /UG_TITLE=ESTs, Moderately similar to T00363 hypothetical protein KIAA0674 (H.sapiens)
	244579_at	0.0035089	1.31676	0.396996	1.31676	up	1.87945	0.910313	1.87945	up	1.31632	0.396513	1.31632	up	1.26904	0.343737	1.26904	up	-0.426398	-0.029402	0.483915	-0.0298854	-0.0826614		Hs.673488	gb:AI086336 /DB_XREF=gi:3424759 /DB_XREF=oz41b09.s1 /CLONE=IMAGE:1677881 /FEA=EST /CNT=3 /TID=Hs.253594.0 /TIER=ConsEnd /STK=3 /UG=Hs.253594 /UG_TITLE=ESTs
	1565861_at	0.00353435	1.07108	0.0990608	1.07108	up	1.09868	0.135775	1.09868	up	1.14468	0.194939	1.14468	up	1.0784	0.108887	1.0784	up	-0.119053	-0.0199924	0.0167222	0.0758863	-0.0101661		Hs.684606	gb:AF147438.1 /DB_XREF=gi:4761789 /TID=Hs2.372550.1 /CNT=5 /FEA=mRNA /TIER=ConsEnd /STK=0 /UG=Hs.372550 /UG_TITLE=Homo sapiens full length insert cDNA clone YP87H12 /DEF=Homo sapiens full length insert cDNA clone YP87H12.
GPR22	244493_at	0.00357432	1.02266	0.0323278	1.02266	up	1.06647	0.0928446	1.06647	up	1.04104	0.0580279	1.04104	up	1.03762	0.0532742	1.03762	up	-0.0468883	-0.0145605	0.0459563	0.0111395	0.00638585	2845		gb:AI655633 /DB_XREF=gi:4739612 /DB_XREF=ts99f01.x1 /CLONE=IMAGE:2239417 /FEA=EST /CNT=4 /TID=Hs.155576.0 /TIER=ConsEnd /STK=3 /UG=Hs.155576 /UG_TITLE=ESTs
	1570623_at	0.00360232	1.10519	0.144296	1.10519	up	1.25453	0.327146	1.25453	up	1.22906	0.297559	1.22906	up	1.09951	0.13686	1.09951	up	-0.125393	0.018903	0.201753	0.172165	0.0114668			gb:BC038672.1 /DB_XREF=gi:24270824 /TID=Hs2.385779.1 /CNT=1 /FEA=mRNA /TIER=ConsEnd /STK=0 /UG=Hs.385779 /UG_TITLE=Homo sapiens, Similar to neuronal thread protein, clone IMAGE:5265833, mRNA /DEF=Homo sapiens, Similar to neuronal thread protein, clone IMAGE:5265833, mRNA.
CNTN5	244632_at	0.00361567	1.01155	0.0165708	1.01155	up	1.00466	0.00671457	1.00466	up	1.03986	0.0563949	1.03986	up	1.09457	0.130371	1.09457	up	-0.0178212	-0.00125035	-0.0111066	0.0385738	0.112549	53942	Hs.656783	gb:H18072 /DB_XREF=gi:884312 /DB_XREF=ym38d12.s1 /CLONE=IMAGE:50757 /FEA=EST /CNT=3 /TID=Hs.92576.0 /TIER=ConsEnd /STK=3 /UG=Hs.92576 /UG_TITLE=ESTs
TAC1	206552_s_at	0.00361716	1.10128	0.139176	1.10128	up	1.03518	0.0498767	1.03518	up	1.07819	0.108611	1.07819	up	1.10974	0.150218	1.10974	up	-0.0812855	0.0578909	-0.0314088	0.0273253	0.0689324	6863	Hs.2563	gb:NM_003182.1 /DB_XREF=gi:4507340 /GEN=TAC1 /FEA=FLmRNA /CNT=13 /TID=Hs.2563.2 /TIER=FL /STK=6 /UG=Hs.2563 /LL=6863 /DEF=Homo sapiens tachykinin, precursor 1 (substance K, substance P, neurokinin 1, neurokinin 2, neuromedin L, neurokinin alpha, neuropeptide K,neuropeptide gamma) (TAC1), transcript variant beta, mRNA. /PROD=tachykinin 2 precursor, isoform beta /FL=gb:U37529.1 gb:NM_003182.1
HECTD2	1565699_at	0.00362651	-1.02445	-0.0348494	1.02445	down	1.07912	0.109851	1.07912	up	1.08905	0.123076	1.08905	up	1.02148	0.030664	1.02148	up	-0.0429507	-0.0778001	0.0669001	0.0801257	-0.0122867	143279		gb:AL832073.1 /DB_XREF=gi:21732615 /TID=Hs2.208047.1 /CNT=4 /FEA=mRNA /TIER=ConsEnd /STK=0 /UG=Hs.208047 /UG_TITLE=Homo sapiens mRNA; cDNA DKFZp313O1018 (from clone DKFZp313O1018) /DEF=Homo sapiens mRNA; cDNA DKFZp313O1018 (from clone DKFZp313O1018).
	1561073_at	0.00363076	1.04519	0.0637592	1.04519	up	1.3594	0.442974	1.3594	up	1.10032	0.137925	1.10032	up	1.0965	0.13291	1.0965	up	-0.122118	-0.0583586	0.320856	0.015807	0.0107925		Hs.658018	gb:AF085868.1 /DB_XREF=gi:3483189 /TID=Hs2.144530.1 /CNT=4 /FEA=mRNA /TIER=ConsEnd /STK=1 /UG=Hs.144530 /UG_TITLE=Homo sapiens full length insert cDNA clone YN88G03 /DEF=Homo sapiens full length insert cDNA clone YN88G03.
	1566772_at	0.00366165	1.03781	0.053536	1.03781	up	1.13306	0.180223	1.13306	up	1.09356	0.129034	1.09356	up	1.01703	0.0243574	1.01703	up	-0.0678205	-0.0142845	0.112403	0.0612134	-0.0434631		Hs.684031	gb:AL832567.1 /DB_XREF=gi:21733142 /TID=Hs2.376983.1 /CNT=1 /FEA=mRNA /TIER=ConsEnd /STK=0 /UG=Hs.376983 /UG_TITLE=Homo sapiens mRNA; cDNA DKFZp547L1918 (from clone DKFZp547L1918) /DEF=Homo sapiens mRNA; cDNA DKFZp547L1918 (from clone DKFZp547L1918).
NMNAT2	1556029_s_at	0.0036713	1.02311	0.0329639	1.02311	up	1.22197	0.289209	1.22197	up	1.09816	0.135094	1.09816	up	1.09798	0.134857	1.09798	up	-0.0811271	-0.0481632	0.208082	0.0539671	0.0537299	23057	Hs.497123	gb:H90656 /DB_XREF=gi:1114965 /DB_XREF=yw29e06.s1 /CLONE=IMAGE:253666 /TID=Hs2.407361.1 /CNT=12 /FEA=mRNA /TIER=Stack /STK=8 /UG=Hs.407361 /UG_TITLE=Homo sapiens full length insert cDNA clone YW29E06
STAU2	204226_at	0.00369793	1.39873	0.484119	1.39873	up	1.69374	0.760217	1.69374	up	1.36336	0.447167	1.36336	up	1.38363	0.468461	1.38363	up	-0.535151	-0.0510317	0.225065	-0.0879837	-0.0666899	27067	Hs.561815	gb:NM_014393.1 /DB_XREF=gi:7657624 /GEN=STAU2 /FEA=FLmRNA /CNT=73 /TID=Hs.96870.0 /TIER=FL+Stack /STK=14 /UG=Hs.96870 /LL=27067 /DEF=Homo sapiens staufen (Drosophila, RNA-binding protein) homolog 2 (STAU2), mRNA. /PROD=staufen homolog 2 /FL=gb:NM_014393.1
MIPEPP3	243760_at	0.00371939	-1.02934	-0.0417193	1.02934	down	-1.04425	-0.0624698	1.04425	down	-1.14305	-0.192883	1.14305	down	-1.17466	-0.232237	1.17466	down	0.0889184	0.0471991	0.0264485	-0.103965	-0.143319	650794	Hs.147563	gb:AI739231 /DB_XREF=gi:5101212 /DB_XREF=wi14f06.x1 /CLONE=IMAGE:2390243 /FEA=EST /CNT=6 /TID=Hs.172599.0 /TIER=ConsEnd /STK=0 /UG=Hs.172599 /UG_TITLE=ESTs, Highly similar to PMIP_HUMAN MITOCHONDRIAL INTERMEDIATE PEPTIDASE PRECURSOR (H.sapiens)
RNF144B	239704_at	0.00373507	1.72789	0.78901	1.72789	up	1.64259	0.715968	1.64259	up	1.4324	0.518433	1.4324	up	1.17496	0.232608	1.17496	up	-0.492729	0.296282	0.22324	0.0257049	-0.26012	255488	Hs.148741	gb:BE274992 /DB_XREF=gi:9149941 /DB_XREF=601122526F1 /CLONE=IMAGE:3346519 /FEA=EST /CNT=6 /TID=Hs.164192.0 /TIER=ConsEnd /STK=4 /UG=Hs.164192 /UG_TITLE=ESTs, Weakly similar to Y161_HUMAN HYPOTHETICAL PROTEIN KIAA0161 (H.sapiens)
UCKL1///ZNF512B	221869_at	0.00375373	-1.12706	-0.172567	1.12706	down	-1.27782	-0.353684	1.27782	down	-1.23873	-0.308864	1.23873	down	-1.24151	-0.3121	1.24151	down	0.272702	0.100136	-0.0809816	-0.036162	-0.0393977	54963///57473	Hs.740578	gb:AL118506 /DB_XREF=gi:10190557 /FEA=mRNA /CNT=51 /TID=Hs.158654.0 /TIER=Stack /STK=12 /UG=Hs.158654 /LL=57473 /UG_GENE=KIAA1196 /UG_TITLE=KIAA1196 protein /DEF=Human DNA sequence from clone RP4-591C20 on chromosome 20. Contains ESTs, STSs, GSSs and CpG islands. Contains a novel gene for a protein similar to NG26, the TPD52L2 gene for two isoforms of tumor protein D52-like protein 2, a gene for …
SALL1	206893_at	0.00377326	1.10431	0.143142	1.10431	up	1.04561	0.0643445	1.04561	up	1.08896	0.122955	1.08896	up	1.09795	0.134816	1.09795	up	-0.0827047	0.0604371	-0.0183602	0.0402499	0.0521116	6299	Hs.135787	gb:NM_002968.1 /DB_XREF=gi:6997248 /GEN=SALL1 /FEA=FLmRNA /CNT=12 /TID=Hs.123094.0 /TIER=FL /STK=0 /UG=Hs.123094 /LL=6299 /DEF=Homo sapiens sal (Drosophila)-like 1 (SALL1), mRNA. /PROD=sal (Drosophila)-like 1 /FL=gb:NM_002968.1
TPM2	212654_at	0.00378186	-1.13652	-0.184617	1.13652	down	-1.15757	-0.211094	1.15757	down	-1.17524	-0.23296	1.17524	down	-1.15723	-0.210679	1.15723	down	0.196954	0.012337	-0.0141395	-0.0360058	-0.0137249	7169	Hs.300772	gb:AL566786 /DB_XREF=gi:12919494 /DB_XREF=AL566786 /CLONE=CS0DF025YL12 (3 prime) /FEA=mRNA /CNT=285 /TID=Hs.300772.1 /TIER=Stack /STK=15 /UG=Hs.300772 /LL=7169 /UG_GENE=TPM2 /UG_TITLE=tropomyosin 2 (beta)
WDR1	210935_s_at	0.00378762	1.26317	0.337054	1.26317	up	1.47367	0.559414	1.47367	up	1.36523	0.449144	1.36523	up	1.43304	0.519081	1.43304	up	-0.415397	-0.0783433	0.144016	0.0337464	0.103683	9948	Hs.128548	gb:AF274954.1 /DB_XREF=gi:12751070 /FEA=FLmRNA /CNT=2 /TID=Hs.326791.0 /TIER=FL /STK=0 /UG=Hs.326791 /DEF=Homo sapiens PNAS-29 mRNA, complete cds. /PROD=PNAS-29 /FL=gb:AF274954.1
	233442_at	0.00378793	-1.03024	-0.0429748	1.03024	down	1.07813	0.10853	1.07813	up	1.06416	0.0897196	1.06416	up	1.13845	0.187075	1.13845	up	-0.0430935	-0.0860683	0.0654363	0.0466261	0.143981		Hs.659733	gb:AU147500 /DB_XREF=gi:11009021 /DB_XREF=AU147500 /CLONE=MAMMA1000867 /FEA=mRNA /CNT=3 /TID=Hs.287499.0 /TIER=ConsEnd /STK=1 /UG=Hs.287499 /UG_TITLE=Homo sapiens cDNA FLJ12196 fis, clone MAMMA1000867
UAP1L1	214755_at	0.00378965	-1.53082	-0.614308	1.53082	down	-2.04741	-1.0338	2.04741	down	-1.89954	-0.925653	1.89954	down	-1.41899	-0.504864	1.41899	down	0.91198	0.297672	-0.121818	-0.0136736	0.407115	91373	Hs.142076	gb:AK022632.1 /DB_XREF=gi:10434135 /FEA=mRNA /CNT=18 /TID=Hs.142076.0 /TIER=ConsEnd /STK=2 /UG=Hs.142076 /UG_TITLE=Homo sapiens cDNA FLJ12570 fis, clone NT2RM4000895 /DEF=Homo sapiens cDNA FLJ12570 fis, clone NT2RM4000895.
LRRTM4	220345_at	0.00382072	1.03811	0.0539629	1.03811	up	1.02498	0.0355912	1.02498	up	1.05842	0.0819062	1.05842	up	1.1178	0.160661	1.1178	up	-0.0537728	0.000190152	-0.0181816	0.0281334	0.106888	80059	Hs.285782	gb:NM_024993.1 /DB_XREF=gi:13376497 /GEN=FLJ12568 /FEA=FLmRNA /CNT=8 /TID=Hs.287534.0 /TIER=FL /STK=1 /UG=Hs.287534 /LL=80059 /DEF=Homo sapiens hypothetical protein FLJ12568 (FLJ12568), mRNA. /PROD=hypothetical protein FLJ12568 /FL=gb:NM_024993.1
ANKLE1	1553138_a_at	0.00382271	-1.12084	-0.164578	1.12084	down	-1.05385	-0.0756764	1.05385	down	-1.20076	-0.263944	1.20076	down	-1.22447	-0.292159	1.22447	down	0.166903	0.00232564	0.091227	-0.0970409	-0.125256	126549	Hs.721610	gb:NM_152363.1 /DB_XREF=gi:22748782 /TID=Hs2.379097.1 /CNT=13 /FEA=FLmRNA /TIER=FL /STK=1 /LL=126549 /UG_GENE=FLJ39369 /UG=Hs.379097 /UG_TITLE=hypothetical protein FLJ39369 /DEF=Homo sapiens hypothetical protein FLJ39369 (FLJ39369), mRNA. /FL=gb:NM_152363.1
IL4I1///NUP62	214935_at	0.0038812	-1.11253	-0.153842	1.11253	down	-1.28237	-0.358813	1.28237	down	-1.22267	-0.290034	1.22267	down	-1.21224	-0.277672	1.21224	down	0.261488	0.107646	-0.0973251	-0.0285457	-0.016184	23636///259307	Hs.574492///Hs.741750	gb:BE794962 /DB_XREF=gi:10216160 /DB_XREF=601589728F1 /CLONE=IMAGE:3943734 /FEA=mRNA /CNT=11 /TID=Hs.9877.3 /TIER=ConsEnd /STK=0 /UG=Hs.9877 /LL=51551 /UG_GENE=DKFZp547L134 /UG_TITLE=hypothetical protein
RPAP1	218441_s_at	0.00388338	-1.2252	-0.293013	1.2252	down	-1.18754	-0.247975	1.18754	down	-1.2172	-0.283563	1.2172	down	-1.17697	-0.235076	1.17697	down	0.21919	-0.073823	-0.028785	-0.0643731	-0.0158858	26015	Hs.371045	gb:NM_015540.1 /DB_XREF=gi:13027585 /GEN=DKFZP727M111 /FEA=FLmRNA /CNT=98 /TID=Hs.4849.0 /TIER=FL /STK=0 /UG=Hs.4849 /LL=26015 /DEF=Homo sapiens DKFZP727M111 protein (DKFZP727M111), mRNA. /PROD=DKFZP727M111 protein /FL=gb:BC000246.1 gb:NM_015540.1
GEMIN8	230758_at	0.00389101	-1.22484	-0.292588	1.22484	down	-1.25677	-0.329716	1.25677	down	-1.19548	-0.257595	1.19548	down	-1.08124	-0.112681	1.08124	down	0.202331	-0.0902571	-0.127385	-0.0552636	0.0896504	54960	Hs.592237	gb:AI765886 /DB_XREF=gi:5232395 /DB_XREF=wh66g05.x1 /CLONE=IMAGE:2385752 /FEA=EST /CNT=8 /TID=Hs.123425.0 /TIER=Stack /STK=8 /UG=Hs.123425 /UG_TITLE=ESTs
	230886_at	0.00389225	-1.34299	-0.425449	1.34299	down	-1.07547	-0.10497	1.07547	down	-1.2829	-0.359408	1.2829	down	-1.35681	-0.440219	1.35681	down	0.207189	-0.21826	0.102219	-0.152219	-0.23303			gb:AW069499 /DB_XREF=gi:6024497 /DB_XREF=cr46g08.x1 /CLONE=HBMSC_cr46g08 /FEA=EST /CNT=10 /TID=Hs.39526.0 /TIER=Stack /STK=8 /UG=Hs.39526 /UG_TITLE=ESTs
HHAT	219687_at	0.00389897	-1.17586	-0.233714	1.17586	down	-1.17328	-0.230549	1.17328	down	-1.1895	-0.25036	1.1895	down	-1.14505	-0.195412	1.14505	down	0.197497	-0.0362173	-0.0330521	-0.0528631	0.00208483	55733	Hs.58650	gb:NM_018194.1 /DB_XREF=gi:8922620 /GEN=FLJ10724 /FEA=FLmRNA /CNT=27 /TID=Hs.58650.0 /TIER=FL+Stack /STK=9 /UG=Hs.58650 /LL=55733 /DEF=Homo sapiens hypothetical protein FLJ10724 (FLJ10724), mRNA. /PROD=hypothetical protein FLJ10724 /FL=gb:NM_018194.1
COL9A2	213622_at	0.00390112	-1.35783	-0.441307	1.35783	down	-1.47689	-0.562558	1.47689	down	-1.37761	-0.462163	1.37761	down	-1.42316	-0.509097	1.42316	down	0.473362	0.032055	-0.0891963	0.0111987	-0.0357356	1298	Hs.418012	gb:AI733465 /DB_XREF=gi:5054578 /DB_XREF=oq93g07.x5 /CLONE=IMAGE:1593948 /FEA=FLmRNA /CNT=35 /TID=Hs.37165.0 /TIER=Stack /STK=11 /UG=Hs.37165 /LL=1298 /UG_GENE=COL9A2 /UG_TITLE=collagen, type IX, alpha 2 /FL=gb:NM_001852.1
	239751_at	0.00390284	1.12353	0.16804	1.12353	up	1.2166	0.28286	1.2166	up	1.35452	0.437785	1.35452	up	1.22465	0.29237	1.22465	up	-0.175371	-0.00733084	0.107489	0.262413	0.116998			gb:AA922231 /DB_XREF=gi:3069540 /DB_XREF=om42f06.s1 /CLONE=IMAGE:1543715 /FEA=EST /CNT=7 /TID=Hs.121397.0 /TIER=ConsEnd /STK=3 /UG=Hs.121397 /UG_TITLE=ESTs
RIN3	1562005_at	0.00391108	1.44964	0.535694	1.44964	up	1.46203	0.547971	1.46203	up	1.26109	0.334667	1.26109	up	-1.05047	-0.0710397	1.05047	down	-0.241254	0.29444	0.306717	0.0934125	-0.312294	79890		gb:BC034153.1 /DB_XREF=gi:22832783 /TID=Hs2.381894.1 /CNT=3 /FEA=mRNA /TIER=ConsEnd /STK=0 /UG=Hs.381894 /UG_TITLE=Homo sapiens cDNA FLJ38826 fis, clone LIVER2009118. /DEF=Homo sapiens, clone IMAGE:4704191, mRNA.
PDSS2	216669_at	0.00391365	1.07714	0.107209	1.07714	up	1.06109	0.0855449	1.06109	up	1.11897	0.162172	1.11897	up	1.0459	0.0647415	1.0459	up	-0.0767295	0.0304792	0.00881532	0.085443	-0.011988	57107		gb:AK000293.1 /DB_XREF=gi:7020278 /FEA=mRNA /CNT=1 /TID=Hs.306391.0 /TIER=ConsEnd /STK=0 /UG=Hs.306391 /UG_TITLE=Homo sapiens cDNA FLJ20286 fis, clone HEP04358 /DEF=Homo sapiens cDNA FLJ20286 fis, clone HEP04358.
FKBP1A	210187_at	0.00393018	2.46406	1.30104	2.46406	up	2.44004	1.2869	2.44004	up	1.42302	0.508955	1.42302	up	1.54418	0.626844	1.54418	up	-0.554424	0.746615	0.73248	-0.0454695	0.0724195	2280	Hs.471933	gb:BC005147.1 /DB_XREF=gi:13477342 /FEA=FLmRNA /CNT=19 /TID=Hs.752.1 /TIER=FL+Stack /STK=8 /UG=Hs.752 /LL=2280 /UG_GENE=FKBP1A /DEF=Homo sapiens, FK506-binding protein 1A (12kD), clone MGC:2167, mRNA, complete cds. /PROD=FK506-binding protein 1A (12kD) /FL=gb:BC005147.1
ADAMTS18	230040_at	0.0039849	1.01481	0.0212042	1.01481	up	1.05132	0.0722022	1.05132	up	1.16109	0.215484	1.16109	up	1.06724	0.0938841	1.06724	up	-0.0720401	-0.0508359	0.000162111	0.143444	0.021844	170692	Hs.188746	gb:AI733120 /DB_XREF=gi:5054233 /DB_XREF=ol07c03.x5 /CLONE=IMAGE:1522756 /FEA=EST /CNT=17 /TID=Hs.188746.0 /TIER=Stack /STK=8 /UG=Hs.188746 /UG_TITLE=ESTs
ANXA1	233011_at	0.00401312	2.37414	1.2474	2.37414	up	2.29208	1.19666	2.29208	up	1.90005	0.926035	1.90005	up	1.92636	0.94588	1.92636	up	-0.876601	0.370802	0.320056	0.0494335	0.0692786	301	Hs.494173	gb:AU155094 /DB_XREF=gi:11016615 /DB_XREF=AU155094 /CLONE=OVARC1000971 /FEA=mRNA /CNT=5 /TID=Hs.287558.0 /TIER=ConsEnd /STK=2 /UG=Hs.287558 /UG_TITLE=Homo sapiens cDNA FLJ13268 fis, clone OVARC1000971
ZNF571	206648_at	0.00402731	-1.26486	-0.33898	1.26486	down	-1.32539	-0.406413	1.32539	down	-1.40319	-0.488709	1.40319	down	-1.33939	-0.421578	1.33939	down	0.420537	0.0815578	0.0141244	-0.0681718	-0.00104036	51276	Hs.590944	gb:NM_016536.1 /DB_XREF=gi:8923786 /GEN=HSPC059 /FEA=FLmRNA /CNT=9 /TID=Hs.272384.0 /TIER=FL /STK=0 /UG=Hs.272384 /LL=51276 /DEF=Homo sapiens HSPC059 protein (HSPC059), mRNA. /PROD=HSPC059 protein /FL=gb:NM_016536.1 gb:AF161544.2
CCL28	224027_at	0.0040299	-1.24108	-0.311596	1.24108	down	-1.31007	-0.389646	1.31007	down	-1.24867	-0.320392	1.24867	down	-1.28019	-0.35636	1.28019	down	0.366212	0.0546156	-0.0234346	0.0458202	0.00985172	56477		gb:AF110384.1 /DB_XREF=gi:12002126 /GEN=CCK1 /FEA=FLmRNA /CNT=5 /TID=Hs.283090.1 /TIER=FL /STK=0 /UG=Hs.283090 /LL=56477 /DEF=Homo sapiens CCK1 protein (CCK1) mRNA, complete cds. /PROD=CCK1 protein /FL=gb:AF220210.1 gb:NM_019846.1 gb:AF110384.1
CCDC94	204335_at	0.00404782	-1.19324	-0.254889	1.19324	down	-1.20386	-0.267663	1.20386	down	-1.22846	-0.296845	1.22846	down	-1.27154	-0.346582	1.27154	down	0.263844	0.00895559	-0.00381883	-0.0330012	-0.0827375	55702	Hs.21811	gb:NM_018074.1 /DB_XREF=gi:8922381 /GEN=FLJ10374 /FEA=FLmRNA /CNT=72 /TID=Hs.21811.0 /TIER=FL+Stack /STK=31 /UG=Hs.21811 /LL=55702 /DEF=Homo sapiens hypothetical protein FLJ10374 (FLJ10374), mRNA. /PROD=hypothetical protein FLJ10374 /FL=gb:NM_018074.1 gb:BC000561.1
UFD1L	209103_s_at	0.00405719	1.14544	0.195896	1.14544	up	1.21074	0.275889	1.21074	up	1.1854	0.245374	1.1854	up	1.21636	0.282576	1.21636	up	-0.201588	-0.00569163	0.0743017	0.0437859	0.0809884	7353	Hs.474213	gb:BC001049.1 /DB_XREF=gi:12654446 /FEA=FLmRNA /CNT=179 /TID=Hs.181369.1 /TIER=FL+Stack /STK=80 /UG=Hs.181369 /LL=7353 /UG_GENE=UFD1L /DEF=Homo sapiens, Similar to ubiquitin fusion degradation 1 like, clone MGC:1385, mRNA, complete cds. /PROD=Similar to ubiquitin fusion degradation 1 like /FL=gb:BC005087.1 gb:BC001049.1 gb:AF141201.1
TEX15	221448_s_at	0.00411857	1.11067	0.151425	1.11067	up	1.17299	0.230189	1.17299	up	1.12935	0.175489	1.12935	up	1.07283	0.101423	1.07283	up	-0.120358	0.0310666	0.109831	0.0551311	-0.0189351	56154	Hs.458316	gb:NM_031271.1 /DB_XREF=gi:13775173 /GEN=TEX15 /FEA=FLmRNA /CNT=1 /TID=HsAffx.900204.1092 /TIER=FL /STK=0 /DEF=Homo sapiens testis expressed sequence 15 (TEX15), mRNA. /PROD=testis expressed sequence 15 /FL=gb:NM_031271.1
	243846_x_at	0.0041456	-1.00479	-0.00689211	1.00479	down	1.18467	0.24449	1.18467	up	1.02611	0.0371891	1.02611	up	-1.15699	-0.210377	1.15699	down	0.0460554	0.0391633	0.290546	0.0832445	-0.164321			gb:H58000 /DB_XREF=gi:1010832 /DB_XREF=yr05g06.s1 /CLONE=IMAGE:204442 /FEA=EST /CNT=3 /TID=Hs.269837.0 /TIER=ConsEnd /STK=3 /UG=Hs.269837 /UG_TITLE=ESTs
GNA14	220108_at	0.00416597	1.07506	0.104419	1.07506	up	1.11062	0.15137	1.11062	up	1.13491	0.182575	1.13491	up	1.23171	0.300667	1.23171	up	-0.130094	-0.0256746	0.0212759	0.052481	0.170573	9630	Hs.657795	gb:NM_004297.1 /DB_XREF=gi:4758443 /GEN=GNA14 /FEA=FLmRNA /CNT=10 /TID=Hs.50612.0 /TIER=FL /STK=3 /UG=Hs.50612 /LL=9630 /DEF=Homo sapiens guanine nucleotide binding protein (G protein), alpha 14 (GNA14), mRNA. /PROD=guanine nucleotide binding protein (G protein),alpha 14 /FL=gb:AF105201.1 gb:NM_004297.1
PATE1	231279_at	0.0041855	-1.08529	-0.11808	1.08529	down	-1.06976	-0.0972814	1.06976	down	-1.07235	-0.10077	1.07235	down	-1.14609	-0.196722	1.14609	down	0.0842775	-0.0338026	-0.0130039	-0.0164924	-0.112444	160065	Hs.148565	gb:BF222654 /DB_XREF=gi:11129932 /DB_XREF=7p57d12.x1 /CLONE=IMAGE:3649967 /FEA=EST /CNT=8 /TID=Hs.148565.0 /TIER=Stack /STK=8 /UG=Hs.148565 /UG_TITLE=ESTs
SEC14L1P1	217667_at	0.00419313	-1.21913	-0.285847	1.21913	down	-1.20222	-0.265702	1.20222	down	-1.20602	-0.270254	1.20602	down	-1.21902	-0.285719	1.21902	down	0.258059	-0.0277878	-0.00764333	-0.0121948	-0.0276605	729799	Hs.368920	gb:AV761014 /DB_XREF=gi:10918862 /DB_XREF=AV761014 /CLONE=MDSCCF09 /FEA=EST /CNT=6 /TID=Hs.291972.0 /TIER=ConsEnd /STK=0 /UG=Hs.291972 /UG_TITLE=ESTs, Moderately similar to SC14_HUMAN SEC14-LIKE PROTEIN (H.sapiens)
PLAC8	219014_at	0.00421254	1.59685	0.675225	1.59685	up	1.79589	0.844699	1.79589	up	1.56798	0.64891	1.56798	up	1.94494	0.959723	1.94494	up	-0.80581	-0.130586	0.0388889	-0.1569	0.153912	51316	Hs.546392	gb:NM_016619.1 /DB_XREF=gi:7706157 /GEN=LOC51316 /FEA=FLmRNA /CNT=86 /TID=Hs.107139.0 /TIER=FL /STK=0 /UG=Hs.107139 /LL=51316 /DEF=Homo sapiens hypothetical protein (LOC51316), mRNA. /PROD=hypothetical protein /FL=gb:NM_016619.1 gb:AF208846.1
UBQLN4	222252_x_at	0.00421409	-1.12748	-0.173107	1.12748	down	1.00493	0.00709706	1.00493	up	-1.05779	-0.0810482	1.05779	down	-1.26111	-0.334692	1.26111	down	0.117335	-0.055772	0.124432	0.0362871	-0.217356	56893	Hs.283739	gb:AK023354.1 /DB_XREF=gi:10435253 /FEA=mRNA /CNT=1 /TID=Hs.283739.1 /TIER=ConsEnd /STK=0 /UG=Hs.283739 /LL=56893 /UG_GENE=A1U /UG_TITLE=ataxin-1 ubiquitin-like interacting protein /DEF=Homo sapiens cDNA FLJ13292 fis, clone OVARC1001180, weakly similar to UBIQUITIN-LIKE PROTEIN DSK2.
MED27	215371_at	0.00422761	-1.18864	-0.249309	1.18864	down	-1.09006	-0.124403	1.09006	down	-1.12245	-0.166651	1.12245	down	-1.18177	-0.240948	1.18177	down	0.148187	-0.101122	0.0237844	-0.0184636	-0.0927605	9442		gb:AU147599 /DB_XREF=gi:11009120 /DB_XREF=AU147599 /CLONE=MAMMA1001154 /FEA=mRNA /CNT=5 /TID=Hs.287501.0 /TIER=ConsEnd /STK=2 /UG=Hs.287501 /UG_TITLE=Homo sapiens cDNA FLJ12227 fis, clone MAMMA1001154
	239984_at	0.00424512	1.06373	0.0891369	1.06373	up	1.28866	0.36587	1.28866	up	1.16609	0.221681	1.16609	up	1.08441	0.116904	1.08441	up	-0.0944258	-0.00528889	0.271444	0.127255	0.0224779			gb:AI333640 /DB_XREF=gi:4070199 /DB_XREF=qp91d12.x1 /CLONE=IMAGE:1930391 /FEA=EST /CNT=5 /TID=Hs.182889.0 /TIER=ConsEnd /STK=4 /UG=Hs.182889 /UG_TITLE=ESTs
SLC16A3	202856_s_at	0.00427312	2.4003	1.26321	2.4003	up	2.62359	1.39154	2.62359	up	2.48756	1.31473	2.48756	up	2.67075	1.41724	2.67075	up	-1.46482	-0.201604	-0.0732753	-0.150083	-0.0475729	9123	Hs.500761	gb:NM_004207.1 /DB_XREF=gi:4759111 /GEN=SLC16A3 /FEA=FLmRNA /CNT=188 /TID=Hs.85838.0 /TIER=FL+Stack /STK=19 /UG=Hs.85838 /LL=9123 /DEF=Homo sapiens solute carrier family 16 (monocarboxylic acid transporters), member 3 (SLC16A3), mRNA. /PROD=solute carrier family 16 (monocarboxylic acidtransporters), member 3 /FL=gb:U81800.1 gb:NM_004207.1
BCL9L	227616_at	0.00429835	-1.27905	-0.355078	1.27905	down	-1.44378	-0.529853	1.44378	down	-1.28807	-0.365207	1.28807	down	-1.24725	-0.318747	1.24725	down	0.371033	0.015955	-0.15882	0.00582583	0.0522856	283149	Hs.414740	gb:BG481877 /DB_XREF=gi:13414156 /DB_XREF=602529281F1 /CLONE=IMAGE:4652468 /FEA=EST /CNT=32 /TID=Hs.23721.0 /TIER=Stack /STK=21 /UG=Hs.23721 /UG_TITLE=ESTs
LRRC28	1553940_a_at	0.00430629	1.40915	0.49483	1.40915	up	1.29216	0.369784	1.29216	up	1.11716	0.159842	1.11716	up	1.16575	0.221261	1.16575	up	-0.174667	0.320163	0.195117	-0.0148246	0.0465938	123355	Hs.578684	gb:NM_144598.1 /DB_XREF=gi:21389386 /TID=Hs2.353215.1 /CNT=3 /FEA=FLmRNA /TIER=FL /STK=0 /LL=123355 /UG_GENE=MGC24976 /UG=Hs.353215 /UG_TITLE=hypothetical protein MGC24976 /DEF=Homo sapiens hypothetical protein MGC24976 (MGC24976), mRNA. /FL=gb:NM_144598.1 gb:BC019704.1
CELF1	204113_at	0.00431338	1.07193	0.100205	1.07193	up	1.1479	0.199001	1.1479	up	1.20059	0.263741	1.20059	up	1.36119	0.444871	1.36119	up	-0.142157	-0.0419522	0.0568433	0.121583	0.302713	10658	Hs.595333	gb:NM_006560.1 /DB_XREF=gi:5729793 /GEN=CUGBP1 /FEA=FLmRNA /CNT=65 /TID=Hs.81248.0 /TIER=FL /STK=2 /UG=Hs.81248 /LL=10658 /DEF=Homo sapiens CUG triplet repeat, RNA-binding protein 1 (CUGBP1), mRNA. /PROD=CUG triplet repeat, RNA-binding protein 1 /FL=gb:U63289.1 gb:AF267534.1 gb:AF267533.1 gb:NM_006560.1
TRIM62	58308_at	0.0043169	1.05611	0.0787623	1.05611	up	-1.1006	-0.138287	1.1006	down	-1.05045	-0.0710073	1.05045	down	-1.06521	-0.0911393	1.06521	down	0.0544536	0.133216	-0.0838338	-0.0165537	-0.0366858	55223	Hs.656006	Cluster Incl. R71157:yi53g05.r1 Homo sapiens cDNA, 5 end /clone=IMAGE-143000 /clone_end=5' /gb=R71157 /gi=844674 /ug=Hs.15921 /len=543
MLLT10	216480_x_at	0.00432685	1.16365	0.218658	1.16365	up	1.26926	0.343988	1.26926	up	1.23454	0.30397	1.23454	up	1.12859	0.174519	1.12859	up	-0.243429	-0.0247715	0.100559	0.060541	-0.0689099	8028	Hs.30385	gb:AF060927.1 /DB_XREF=gi:3139004 /GEN=AF10CALM /FEA=mRNA /CNT=1 /TID=Hs.301209.2 /TIER=ConsEnd /STK=0 /UG=Hs.301209 /LL=8028 /DEF=Homo sapiens type I AF10CALM fusion protein (AF10CALM) mRNA, partial cds. /PROD=type I AF10CALM fusion protein
TOR1AIP2	240700_at	0.00434448	1.27007	0.344911	1.27007	up	1.26792	0.342463	1.26792	up	1.31143	0.391136	1.31143	up	1.36759	0.451635	1.36759	up	-0.289028	0.0558825	0.0534352	0.102107	0.162607	163590	Hs.571797	gb:BF508833 /DB_XREF=gi:11592131 /DB_XREF=UI-H-BI4-aor-c-12-0-UI.s1 /CLONE=IMAGE:3085823 /FEA=EST /CNT=4 /TID=Hs.196550.0 /TIER=ConsEnd /STK=4 /UG=Hs.196550 /UG_TITLE=ESTs, Moderately similar to T08767 probable lamina-associated protein DKFZp586G011.1 (H.sapiens)
MAP3K11	1558984_at	0.0043622	1.14068	0.18989	1.14068	up	1.06516	0.091064	1.06516	up	1.11185	0.152961	1.11185	up	1.2471	0.318575	1.2471	up	-0.0931547	0.0967351	-0.00209072	0.0598062	0.22542	4296		gb:AK092015.1 /DB_XREF=gi:21750511 /TID=Hs2.432787.1 /CNT=9 /FEA=mRNA /TIER=ConsEnd /STK=0 /UG=Hs.432787 /UG_TITLE=Homo sapiens cDNA FLJ34696 fis, clone MESAN2002113, highly similar to Human SH3 domain-containing proline-rich kinase (sprk) mRNA. /DEF=Homo sapiens cDNA FLJ34696 fis, clone MESAN2002113, highly similar to Human SH3 domain-containing proline-rich kinase (sprk) mRNA.
	1557883_a_at	0.0044079	-1.0147	-0.0210568	1.0147	down	1.00801	0.0115072	1.00801	up	1.05803	0.0813823	1.05803	up	1.07496	0.104283	1.07496	up	-0.0277194	-0.0487762	-0.0162123	0.0536629	0.0765637		Hs.208125	gb:AI806183 /DB_XREF=gi:5392749 /DB_XREF=wf26a04.x1 /CLONE=IMAGE:2356686 /TID=Hs2.208125.1 /CNT=3 /FEA=mRNA /TIER=ConsEnd /STK=1 /UG=Hs.208125 /UG_TITLE=Homo sapiens cDNA FLJ30446 fis, clone BRACE2009255.
	234758_at	0.00442197	-1.07947	-0.11033	1.07947	down	-1.00639	-0.00919206	1.00639	down	-1.04188	-0.0591872	1.04188	down	-1.13508	-0.18279	1.13508	down	0.0559498	-0.0543799	0.0467578	-0.00323736	-0.12684		Hs.677396	gb:AK026789.1 /DB_XREF=gi:10439724 /FEA=mRNA /CNT=1 /TID=Hs.306878.0 /TIER=ConsEnd /STK=0 /UG=Hs.306878 /UG_TITLE=Homo sapiens cDNA: FLJ23136 fis, clone LNG08753 /DEF=Homo sapiens cDNA: FLJ23136 fis, clone LNG08753.
GAPDH	AFFX-HUMGAPDH/M33197_5_at	0.00442438	1.24322	0.31408	1.24322	up	1.26967	0.344457	1.26967	up	1.21141	0.276693	1.21141	up	1.27761	0.353447	1.27761	up	-0.299139	0.0149404	0.0453173	-0.0224462	0.0543078	2597	Hs.544577	H. sapiens /GEN=GAPD /DB_XREF=gb:M33197.1 /NOTE=SIF corresponding to nucleotides 87-387 of gb:M33197.1 /DEF=Human glyceraldehyde-3-phosphate dehydrogenase (GAPDH) mRNA, complete cds.
LEPR///LEPROT	1556997_a_at	0.00444663	-1.00381	-0.00548252	1.00381	down	1.03323	0.0471669	1.03323	up	1.03613	0.0512087	1.03613	up	1.11988	0.163343	1.11988	up	-0.027337	-0.0328195	0.0198299	0.0238717	0.136006	3953///54741	Hs.258228	gb:BC036581.1 /DB_XREF=gi:22477277 /TID=Hs2.258228.1 /CNT=4 /FEA=mRNA /TIER=ConsEnd /STK=2 /UG=Hs.258228 /UG_TITLE=Homo sapiens, clone IMAGE:4795984, mRNA /DEF=Homo sapiens, clone IMAGE:4795984, mRNA.
PTK2	1559529_at	0.00445635	-1.07717	-0.10724	1.07717	down	1.05257	0.0739103	1.05257	up	1.02488	0.0354494	1.02488	up	-1.0565	-0.0792927	1.0565	down	0.00850368	-0.0987368	0.082414	0.0439531	-0.070789	5747	Hs.395482	gb:BC043202.1 /DB_XREF=gi:27695807 /TID=Hs2.436335.1 /CNT=6 /FEA=mRNA /TIER=ConsEnd /STK=0 /UG=Hs.436335 /UG_TITLE=Homo sapiens, clone IMAGE:5294745, mRNA /DEF=Homo sapiens, clone IMAGE:5294745, mRNA.
DCK	203302_at	0.00446211	-1.21461	-0.280495	1.21461	down	-1.36611	-0.450075	1.36611	down	-1.41275	-0.498504	1.41275	down	-1.35913	-0.442678	1.35913	down	0.333125	0.0526294	-0.116951	-0.16538	-0.109554	1633	Hs.709	gb:NM_000788.1 /DB_XREF=gi:4503268 /GEN=DCK /FEA=FLmRNA /CNT=97 /TID=Hs.709.0 /TIER=FL+Stack /STK=26 /UG=Hs.709 /LL=1633 /DEF=Homo sapiens deoxycytidine kinase (DCK), mRNA. /PROD=deoxycytidine kinase /FL=gb:NM_000788.1 gb:M60527.1
	228259_s_at	0.00448473	-1.18665	-0.246893	1.18665	down	-1.25174	-0.323933	1.25174	down	-1.31751	-0.397811	1.31751	down	-1.41338	-0.499154	1.41338	down	0.342589	0.095696	0.0186555	-0.055222	-0.156566			gb:AW590155 /DB_XREF=gi:7277282 /DB_XREF=hg40c04.x1 /CLONE=IMAGE:2948070 /FEA=mRNA /CNT=23 /TID=Hs.12082.2 /TIER=Stack /STK=12 /UG=Hs.12082 /UG_TITLE=Homo sapiens mRNA; cDNA DKFZp566L203 (from clone DKFZp566L203)
DCAF4	226938_at	0.00448511	-1.32735	-0.408544	1.32735	down	-1.29028	-0.367683	1.29028	down	-1.31817	-0.398542	1.31817	down	-1.18993	-0.250872	1.18993	down	0.318804	-0.0897409	-0.0488793	-0.0797382	0.0679316	26094	Hs.331491	gb:AA160604 /DB_XREF=gi:1736050 /DB_XREF=zo75c04.s1 /CLONE=IMAGE:592710 /FEA=EST /CNT=31 /TID=Hs.6107.0 /TIER=Stack /STK=24 /UG=Hs.6107 /LL=26094 /UG_GENE=DKFZP434K114 /UG_TITLE=DKFZP434K114 protein
UBE2I	233360_at	0.00449209	-1.31056	-0.390188	1.31056	down	-1.22645	-0.294493	1.22645	down	-1.1834	-0.242943	1.1834	down	-1.23487	-0.304361	1.23487	down	0.280857	-0.109331	-0.013636	0.0379134	-0.0235044	7329		gb:AK024172.1 /DB_XREF=gi:10436488 /FEA=mRNA /CNT=3 /TID=Hs.84285.3 /TIER=ConsEnd /STK=0 /UG=Hs.84285 /LL=7329 /UG_GENE=UBE2I /UG_TITLE=ubiquitin-conjugating enzyme E2I (homologous to yeast UBC9) /DEF=Homo sapiens cDNA FLJ14110 fis, clone MAMMA1001502.
RDH13	225467_s_at	0.00449919	-1.3685	-0.452597	1.3685	down	-1.24995	-0.321874	1.24995	down	-1.17208	-0.229075	1.17208	down	-1.03199	-0.0454313	1.03199	down	0.234546	-0.218051	-0.0873274	0.00547179	0.189115	112724	Hs.327631	gb:BG163591 /DB_XREF=gi:12670294 /DB_XREF=602338741F1 /CLONE=IMAGE:4446611 /FEA=EST /CNT=92 /TID=Hs.178617.0 /TIER=Stack /STK=11 /UG=Hs.178617 /UG_TITLE=ESTs, Weakly similar to AF151840 1 CGI-82 protein (H.sapiens)
LMBR1	222506_at	0.0045112	1.05058	0.0711915	1.05058	up	1.34453	0.427099	1.34453	up	1.05939	0.083231	1.05939	up	1.15237	0.204601	1.15237	up	-0.10004	-0.028849	0.327058	-0.0168095	0.10456	64327	Hs.209989	gb:AF107454 /DB_XREF=gi:5052209 /DB_XREF=AF107454 /CLONE=cD622 /FEA=FLmRNA /CNT=184 /TID=Hs.107537.0 /TIER=Stack /STK=25 /UG=Hs.107537 /LL=64327 /UG_GENE=C7ORF2 /UG_TITLE=chromosome 7 open reading frame 2 /FL=gb:NM_022458.1
	1556331_a_at	0.00454557	1.19266	0.254187	1.19266	up	1.23869	0.308816	1.23869	up	1.21197	0.277355	1.21197	up	1.09074	0.125302	1.09074	up	-0.160412	0.093775	0.148403	0.116943	-0.0351106		Hs.658896	gb:BC035063.1 /DB_XREF=gi:23273334 /TID=Hs2.300648.1 /CNT=8 /FEA=mRNA /TIER=ConsEnd /STK=3 /UG=Hs.300648 /UG_TITLE=Homo sapiens, clone IMAGE:5259142, mRNA /DEF=Homo sapiens, clone IMAGE:5259142, mRNA.
GK5	238121_at	0.00455555	1.21354	0.279223	1.21354	up	1.54372	0.626412	1.54372	up	-1.03736	-0.0529173	1.03736	down	-1.07078	-0.0986677	1.07078	down	-0.185254	0.093969	0.441157	-0.238172	-0.283922	256356	Hs.135904	gb:AI473796 /DB_XREF=gi:4326841 /DB_XREF=tm03d11.x1 /CLONE=IMAGE:2155509 /FEA=EST /CNT=7 /TID=Hs.135904.0 /TIER=ConsEnd /STK=5 /UG=Hs.135904 /UG_TITLE=ESTs
KIAA2022	244370_at	0.00459629	-1.03571	-0.0506187	1.03571	down	1.01422	0.0203726	1.01422	up	1.10508	0.144148	1.10508	up	1.13843	0.187041	1.13843	up	-0.0499392	-0.100558	-0.0295665	0.0942085	0.137101	340533	Hs.124128	gb:AI743137 /DB_XREF=gi:5111425 /DB_XREF=wg87f12.x1 /CLONE=IMAGE:2372111 /FEA=EST /CNT=3 /TID=Hs.66035.0 /TIER=ConsEnd /STK=3 /UG=Hs.66035 /UG_TITLE=ESTs
	1569810_at	0.004598	1.0618	0.0865175	1.0618	up	1.04337	0.0612467	1.04337	up	-1.01804	-0.025788	1.01804	down	1.02539	0.0361752	1.02539	up	-0.0228076	0.06371	0.0384392	-0.0485956	0.0133677		Hs.587354	gb:BC038785.1 /DB_XREF=gi:24270857 /TID=Hs2.385768.1 /CNT=2 /FEA=mRNA /TIER=ConsEnd /STK=1 /UG=Hs.385768 /UG_TITLE=Homo sapiens, clone IMAGE:5271710, mRNA /DEF=Homo sapiens, clone IMAGE:5271710, mRNA.
	1559148_at	0.00463323	-1.1421	-0.191691	1.1421	down	-1.15183	-0.20393	1.15183	down	-1.1691	-0.225404	1.1691	down	-1.04262	-0.0602085	1.04262	down	0.159941	-0.0317501	-0.0439892	-0.0654627	0.0997325		Hs.375763	gb:AL048861 /DB_XREF=gi:4728170 /DB_XREF=DKFZp434H1718_s1 /CLONE=DKFZp434H1718 /TID=Hs2.375763.1 /CNT=6 /FEA=mRNA /TIER=ConsEnd /STK=0 /UG=Hs.375763 /UG_TITLE=Homo sapiens cDNA FLJ31584 fis, clone NT2RI2002153.
DDX51	1554085_at	0.00464658	-1.36629	-0.450259	1.36629	down	-1.31534	-0.395438	1.31534	down	-1.37676	-0.461274	1.37676	down	-1.30329	-0.382156	1.30329	down	0.356087	-0.0941721	-0.0393509	-0.105187	-0.0260685	317781	Hs.445168	gb:BC012461.1 /DB_XREF=gi:15214664 /TID=Hs2.250638.1 /CNT=55 /FEA=FLmRNA /TIER=FL /STK=4 /LL=317781 /UG_GENE=MGC42193 /UG=Hs.250638 /DEF=Homo sapiens, Similar to RIKEN cDNA 2310061O04 gene, clone MGC:21583 IMAGE:4479998, mRNA, complete cds. /PROD=Similar to RIKEN cDNA 2310061O04 gene /FL=gb:BC012461.1 gb:BC040185.1
PCMT1	210156_s_at	0.00465745	1.39666	0.481982	1.39666	up	1.4982	0.583229	1.4982	up	1.22513	0.292934	1.22513	up	1.25402	0.326557	1.25402	up	-0.305722	0.17626	0.277507	-0.0127875	0.0208353	5110	Hs.279257	gb:D25547.1 /DB_XREF=gi:1332402 /FEA=FLmRNA /CNT=16 /TID=Hs.79137.1 /TIER=FL+Stack /STK=11 /UG=Hs.79137 /LL=5110 /UG_GENE=PCMT1 /DEF=Homo sapiens mRNA for PIMT isozyme I, complete cds. /PROD=PIMT isozyme I /FL=gb:D25547.1
LOC105369261///SPN	206056_x_at	0.00466823	-1.13921	-0.188034	1.13921	down	-1.03912	-0.0553566	1.03912	down	-1.11505	-0.15711	1.11505	down	-1.21952	-0.286311	1.21952	down	0.110641	-0.0773929	0.0552844	-0.0464691	-0.17567	6693///105369261	Hs.632188	gb:X52075 /DB_XREF=gi:36455 /FEA=FLmRNA /CNT=21 /TID=Hs.80738.0 /TIER=ConsEnd /STK=0 /UG=Hs.80738 /LL=6693 /UG_GENE=SPN /UG_TITLE=sialophorin (gpL115, leukosialin, CD43) /DEF=Human gene for sialophorin (CD43) /FL=gb:J04536.1 gb:NM_003123.1
VSTM2A	236308_at	0.0046693	1.03416	0.0484596	1.03416	up	1.02208	0.0315137	1.02208	up	1.09408	0.129722	1.09408	up	1.03896	0.0551345	1.03896	up	-0.0447967	0.00366288	-0.013283	0.0849258	0.0103378	222008	Hs.731937	gb:D60436 /DB_XREF=gi:962075 /DB_XREF=HUM108F02A /CLONE=GEN-108F02 /FEA=EST /CNT=9 /TID=Hs.34772.0 /TIER=ConsEnd /STK=7 /UG=Hs.34772 /UG_TITLE=ESTs
CCDC178	1558820_a_at	0.00470773	1.00855	0.0122799	1.00855	up	1.16994	0.226429	1.16994	up	1.12653	0.171886	1.12653	up	1.05894	0.0826187	1.05894	up	-0.0840526	-0.0717727	0.142377	0.0878331	-0.0014339	374864	Hs.115461	gb:AK000027.1 /DB_XREF=gi:7019843 /TID=Hs2.98633.1 /CNT=8 /FEA=mRNA /TIER=ConsEnd /STK=0 /UG=Hs.98633 /UG_TITLE=Homo sapiens cDNA FLJ20020 fis, clone ADSE00961. /DEF=Homo sapiens cDNA FLJ20020 fis, clone ADSE00961.
G6PD	202275_at	0.00471505	1.55225	0.634362	1.55225	up	1.65376	0.725746	1.65376	up	1.49114	0.576417	1.49114	up	1.72196	0.784052	1.72196	up	-0.371512	0.26285	0.354234	0.204905	0.41254	2539	Hs.461047	gb:NM_000402.1 /DB_XREF=gi:4503844 /GEN=G6PD /FEA=FLmRNA /CNT=225 /TID=Hs.80206.0 /TIER=FL+Stack /STK=58 /UG=Hs.80206 /LL=2539 /DEF=Homo sapiens glucose-6-phosphate dehydrogenase (G6PD), nuclear gene encoding mitochondrial protein, mRNA. /PROD=glucose-6-phosphate dehydrogenase /FL=gb:BC000337.1 gb:NM_000402.1 gb:M21248.1
	1561639_at	0.00472512	1.07777	0.10805	1.07777	up	1.24077	0.311233	1.24077	up	1.21948	0.286264	1.21948	up	1.27948	0.355555	1.27948	up	-0.175851	-0.0678011	0.135382	0.110413	0.179704		Hs.684616	gb:AF147406.1 /DB_XREF=gi:4761757 /TID=Hs2.384149.1 /CNT=2 /FEA=mRNA /TIER=ConsEnd /STK=1 /UG=Hs.384149 /UG_TITLE=Homo sapiens full length insert cDNA clone YP51C12 /DEF=Homo sapiens full length insert cDNA clone YP51C12.
DDX56	238525_at	0.00472832	-1.13628	-0.184312	1.13628	down	-1.07919	-0.109947	1.07919	down	-1.15986	-0.213948	1.15986	down	-1.13296	-0.180103	1.13296	down	0.135197	-0.0491157	0.02525	-0.0787513	-0.044906	54606	Hs.654762	gb:BF987157 /DB_XREF=gi:12393479 /DB_XREF=MR2-GN0127-051000-001-e03 /FEA=EST /CNT=11 /TID=Hs.303345.0 /TIER=ConsEnd /STK=0 /UG=Hs.303345 /UG_TITLE=ESTs
GAPDH	AFFX-HUMGAPDH/M33197_M_at	0.00475225	1.22015	0.287064	1.22015	up	1.26693	0.34134	1.26693	up	1.19953	0.262471	1.19953	up	1.28285	0.359353	1.28285	up	-0.280203	0.00686095	0.0611372	-0.017732	0.0791506	2597	Hs.544577	H. sapiens /GEN=GAPD /DB_XREF=gb:M33197.1 /NOTE=SIF corresponding to nucleotides 493-832 of gb:M33197.1 /DEF=Human glyceraldehyde-3-phosphate dehydrogenase (GAPDH) mRNA, complete cds.
	240125_at	0.00478158	1.0704	0.0981481	1.0704	up	1.17484	0.232465	1.17484	up	1.15901	0.212887	1.15901	up	1.19252	0.254015	1.19252	up	-0.158388	-0.0602398	0.0740767	0.0544991	0.095627		Hs.672221	gb:AI697494 /DB_XREF=gi:4985394 /DB_XREF=we14b03.x1 /CLONE=IMAGE:2341037 /FEA=EST /CNT=4 /TID=Hs.202119.0 /TIER=ConsEnd /STK=4 /UG=Hs.202119 /UG_TITLE=ESTs, Weakly similar to A46010 X-linked retinopathy protein (H.sapiens)
CCDC13	1553396_a_at	0.00479013	-1.18432	-0.244053	1.18432	down	-1.28382	-0.360441	1.28382	down	-1.22328	-0.29076	1.22328	down	-1.27051	-0.345413	1.27051	down	0.245466	0.0014135	-0.114974	-0.0452932	-0.0999461	152206	Hs.604182	gb:NM_144719.1 /DB_XREF=gi:21389502 /TID=Hs2.351117.1 /CNT=3 /FEA=FLmRNA /TIER=FL /STK=1 /LL=152206 /UG_GENE=FLJ25467 /UG=Hs.351117 /UG_TITLE=hypothetical protein FLJ25467 /DEF=Homo sapiens hypothetical protein FLJ25467 (FLJ25467), mRNA. /FL=gb:NM_144719.1
LETM1	222006_at	0.00479784	-1.33139	-0.412935	1.33139	down	-1.26142	-0.335051	1.26142	down	-1.37038	-0.454575	1.37038	down	-1.24708	-0.318554	1.24708	down	0.28559	-0.127344	-0.0494601	-0.168984	-0.0329641	3954	Hs.120165	gb:AI359368 /DB_XREF=gi:4110989 /DB_XREF=qy27h02.x1 /CLONE=IMAGE:2013267 /FEA=EST /CNT=18 /TID=Hs.120165.1 /TIER=Stack /STK=12 /UG=Hs.120165 /LL=3954 /UG_GENE=LETM1 /UG_TITLE=leucine zipper-EF-hand containing transmembrane protein 1
OCRL	208316_s_at	0.00483963	1.24592	0.317207	1.24592	up	1.31507	0.395137	1.31507	up	1.16403	0.219127	1.16403	up	1.2527	0.325036	1.2527	up	-0.204836	0.112371	0.190301	0.014291	0.1202	4952	Hs.126357	gb:M88162.2 /DB_XREF=gi:13249984 /GEN=OCRL /FEA=FLmRNA /CNT=4 /TID=Hs.181060.0 /TIER=FL /STK=0 /UG=Hs.181060 /LL=4952 /DEF=Homo sapiens Lowe oculocerebrorenal syndrome protein (OCRL) mRNA, complete cds. /PROD=Lowe oculocerebrorenal syndrome protein /FL=gb:NM_001587.2 gb:M88162.2
CRKL	206184_at	0.00484955	1.13627	0.184309	1.13627	up	1.20807	0.272709	1.20807	up	1.31768	0.397998	1.31768	up	1.48223	0.567767	1.48223	up	-0.373577	-0.189269	-0.100868	0.0244208	0.19419	1399	Hs.5613	gb:NM_005207.1 /DB_XREF=gi:4885152 /GEN=CRKL /FEA=FLmRNA /CNT=16 /TID=Hs.37078.0 /TIER=FL /STK=0 /UG=Hs.37078 /LL=1399 /DEF=Homo sapiens v-crk avian sarcoma virus CT10 oncogene homolog-like (CRKL), mRNA. /PROD=v-crk avian sarcoma virus CT10 oncogenehomolog-like /FL=gb:NM_005207.1
NF1	211914_x_at	0.00486247	1.25249	0.324794	1.25249	up	1.36984	0.454009	1.36984	up	1.35503	0.438323	1.35503	up	1.22773	0.295993	1.22773	up	-0.252694	0.0720998	0.201315	0.185628	0.0432987	4763	Hs.113577	gb:M60915.1 /DB_XREF=gi:189159 /GEN=NF1 /FEA=FLmRNA /CNT=1 /TID=HsAffx.900422.1127 /TIER=FL /STK=0 /DEF=Human neurofibromatosis protein type I (NF1) mRNA, complete cds. /PROD=neurofibromatosis protein type 1 /FL=gb:M60915.1
	1563333_at	0.00486888	1.09992	0.137399	1.09992	up	1.07192	0.100195	1.07192	up	1.05433	0.0763303	1.05433	up	1.13788	0.186344	1.13788	up	-0.0756453	0.0617535	0.0245496	0.000684977	0.110698		Hs.684680	gb:AF087965.1 /DB_XREF=gi:3523171 /TID=Hs2.384569.1 /CNT=2 /FEA=mRNA /TIER=ConsEnd /STK=0 /UG=Hs.384569 /UG_TITLE=Homo sapiens full length insert cDNA clone YU51E08 /DEF=Homo sapiens full length insert cDNA clone YU51E08.
ZDHHC2	222731_at	0.0048852	-1.11069	-0.151456	1.11069	down	1.09444	0.130197	1.09444	up	1.02488	0.035454	1.02488	up	-1.29884	-0.37722	1.29884	down	0.0885509	-0.0629049	0.218748	0.124005	-0.288669	51201	Hs.744097	gb:AK001608.1 /DB_XREF=gi:7022967 /FEA=FLmRNA /CNT=81 /TID=Hs.5943.0 /TIER=Stack /STK=13 /UG=Hs.5943 /LL=51201 /UG_GENE=LOC51201 /UG_TITLE=rec /DEF=Homo sapiens cDNA FLJ10746 fis, clone NT2RP3001679. /FL=gb:NM_016353.1 gb:AB023584.1
EMC10	222345_at	0.00488953	-1.27316	-0.348411	1.27316	down	-1.18009	-0.238894	1.18009	down	-1.26484	-0.338951	1.26484	down	-1.24596	-0.317263	1.24596	down	0.266927	-0.0814839	0.0280327	-0.0720237	-0.0503356	284361		gb:BF229395 /DB_XREF=gi:11166291 /DB_XREF=MR1-CI0019-260900-001-a11 /FEA=EST /CNT=6 /TID=Hs.159454.0 /TIER=ConsEnd /STK=0 /UG=Hs.159454 /UG_TITLE=ESTs
CYP3A5	214235_at	0.00491593	-1.04096	-0.057909	1.04096	down	1.10994	0.150484	1.10994	up	-1.03744	-0.0530217	1.03744	down	1.00204	0.00294419	1.00204	up	-0.00148013	-0.0593892	0.149004	-0.0545018	0.00146406	1577	Hs.571258	gb:X90579.1 /DB_XREF=gi:945005 /FEA=mRNA /CNT=14 /TID=Hs.166079.0 /TIER=Stack /STK=11 /UG=Hs.166079 /UG_TITLE=H.sapiens DNA for cyp related pseudogene /DEF=H.sapiens DNA for cyp related pseudogene.
EHMT1	222873_s_at	0.00492803	-1.00902	-0.0129574	1.00902	down	-1.08432	-0.116786	1.08432	down	-1.21104	-0.276251	1.21104	down	-1.23896	-0.309128	1.23896	down	0.141507	0.12855	0.0247213	-0.134743	-0.167621	79813	Hs.495511	gb:AI739378 /DB_XREF=gi:5101359 /DB_XREF=wi29e05.x1 /CLONE=IMAGE:2391680 /FEA=FLmRNA /CNT=39 /TID=Hs.127236.0 /TIER=Stack /STK=10 /UG=Hs.127236 /LL=79813 /UG_GENE=FLJ12879 /UG_TITLE=hypothetical protein FLJ12879 /FL=gb:NM_024757.1
	1566115_at	0.00493675	1.06993	0.0975197	1.06993	up	1.05156	0.0725343	1.05156	up	1.10115	0.139012	1.10115	up	1.11161	0.152648	1.11161	up	-0.0871958	0.0103239	-0.0146615	0.0518166	0.065452		Hs.683968	gb:AL833742.1 /DB_XREF=gi:21734392 /TID=Hs2.376815.1 /CNT=2 /FEA=mRNA /TIER=ConsEnd /STK=0 /UG=Hs.376815 /UG_TITLE=Homo sapiens mRNA; cDNA DKFZp666E186 (from clone DKFZp666E186) /DEF=Homo sapiens mRNA; cDNA DKFZp666E186 (from clone DKFZp666E186).
CALD1	205525_at	0.00493783	1.04734	0.0667232	1.04734	up	1.1965	0.258818	1.1965	up	1.09763	0.134398	1.09763	up	1.00575	0.00826811	1.00575	up	-0.0586598	0.00806342	0.200158	0.0757386	-0.0503917	800		gb:NM_018495.3 /DB_XREF=gi:13236500 /GEN=LOC55873 /FEA=FLmRNA /CNT=35 /TID=Hs.283080.0 /TIER=FL /STK=0 /UG=Hs.283080 /LL=55873 /DEF=Homo sapiens NAG22 protein (LOC55873), mRNA. /PROD=NAG22 protein /FL=gb:AF247820.3 gb:NM_018495.3
	1559006_at	0.00496103	-1.17928	-0.237904	1.17928	down	-1.22276	-0.29014	1.22276	down	-1.15887	-0.212723	1.15887	down	-1.20114	-0.264404	1.20114	down	0.23137	-0.00653418	-0.0587703	0.0186468	-0.0330343		Hs.397001	gb:BC007784.1 /DB_XREF=gi:14043620 /TID=Hs2.397001.1 /CNT=9 /FEA=mRNA /TIER=ConsEnd /STK=0 /UG=Hs.397001 /UG_TITLE=Homo sapiens, clone IMAGE:4304686, mRNA /DEF=Homo sapiens, clone IMAGE:4304686, mRNA.
RAB3IP	1565800_x_at	0.00499799	-1.00035	-0.000501882	1.00035	down	1.04962	0.0698625	1.04962	up	1.06975	0.0972728	1.06975	up	1.06176	0.086457	1.06176	up	-0.0383747	-0.0388766	0.0314878	0.0588981	0.0480823	117177	Hs.258209	gb:BG573839 /DB_XREF=gi:13581492 /DB_XREF=602594959F1 /CLONE=IMAGE:4722062 /TID=Hs2.382169.1 /CNT=3 /FEA=mRNA /TIER=ConsEnd /STK=0 /UG=Hs.382169 /UG_TITLE=Homo sapiens, clone IMAGE:4796818, mRNA
EPHB6	204718_at	0.00500046	-1.35066	-0.433662	1.35066	down	-1.30306	-0.381899	1.30306	down	-1.35483	-0.438107	1.35483	down	-1.42264	-0.508573	1.42264	down	0.348828	-0.0848342	-0.0330712	-0.0892789	-0.159746	2051	Hs.380089	gb:NM_004445.1 /DB_XREF=gi:4758291 /GEN=EPHB6 /FEA=FLmRNA /CNT=49 /TID=Hs.3796.0 /TIER=FL+Stack /STK=15 /UG=Hs.3796 /LL=2051 /DEF=Homo sapiens EphB6 (EPHB6) mRNA. /PROD=EphB6 /FL=gb:D83492.1 gb:NM_004445.1
	1563467_at	0.00500659	2.13997	1.09759	2.13997	up	2.55339	1.35242	2.55339	up	2.05389	1.03836	2.05389	up	1.58734	0.66661	1.58734	up	-0.3654	0.732189	0.987016	0.672961	0.30121		Hs.683994	gb:AL833266.1 /DB_XREF=gi:21733899 /TID=Hs2.407118.1 /CNT=1 /FEA=mRNA /TIER=ConsEnd /STK=0 /UG=Hs.407118 /UG_TITLE=Homo sapiens mRNA; cDNA DKFZp451G0810 (from clone DKFZp451G0810) /DEF=Homo sapiens mRNA; cDNA DKFZp451G0810 (from clone DKFZp451G0810).
PUS10	1553280_at	0.00501621	1.10705	0.146717	1.10705	up	1.26063	0.334139	1.26063	up	1.20198	0.265409	1.20198	up	1.24988	0.321784	1.24988	up	-0.218593	-0.0718764	0.115546	0.0468158	0.103191	150962	Hs.368348	gb:NM_144709.1 /DB_XREF=gi:21389306 /TID=Hs2.112830.1 /CNT=6 /FEA=FLmRNA /TIER=FL /STK=1 /LL=150962 /UG_GENE=FLJ32312 /UG=Hs.112830 /UG_TITLE=hypothetical protein FLJ32312 /DEF=Homo sapiens hypothetical protein FLJ32312 (FLJ32312), mRNA. /FL=gb:NM_144709.1
KLHL36	238523_at	0.00503814	-1.43431	-0.520354	1.43431	down	-1.21828	-0.284846	1.21828	down	-1.31237	-0.392179	1.31237	down	-1.1877	-0.248166	1.1877	down	0.307502	-0.212852	0.0226559	-0.0846766	0.0593367	79786	Hs.222731///Hs.578546	gb:BF941204 /DB_XREF=gi:12358524 /DB_XREF=7d94h07.x1 /CLONE=IMAGE:3280764 /FEA=EST /CNT=9 /TID=Hs.302743.0 /TIER=ConsEnd /STK=2 /UG=Hs.302743 /UG_TITLE=ESTs
ZFAND3	222493_s_at	0.00506702	1.25148	0.323633	1.25148	up	1.38269	0.467475	1.38269	up	1.44957	0.535621	1.44957	up	1.32892	0.410256	1.32892	up	-0.359201	-0.0355678	0.108273	0.17642	0.0510552	60685	Hs.36959	gb:AW303359 /DB_XREF=gi:6713039 /DB_XREF=xv18b07.x1 /CLONE=IMAGE:2813461 /FEA=FLmRNA /CNT=203 /TID=Hs.6120.0 /TIER=Stack /STK=15 /UG=Hs.6120 /LL=60685 /UG_GENE=FLJ13222 /UG_TITLE=hypothetical protein FLJ13222 /FL=gb:NM_021943.1
PLA2G6	215938_s_at	0.00510271	-1.14141	-0.190815	1.14141	down	-1.21223	-0.277667	1.21223	down	-1.17737	-0.235568	1.17737	down	-1.2285	-0.296897	1.2285	down	0.213273	0.0224578	-0.0643944	-0.0222955	-0.0836242	8398	Hs.170479	gb:AK001290.1 /DB_XREF=gi:7022453 /FEA=mRNA /CNT=2 /TID=Hs.120360.2 /TIER=ConsEnd /STK=0 /UG=Hs.120360 /LL=8398 /UG_GENE=PLA2G6 /UG_TITLE=phospholipase A2, group VI (cytosolic, calcium-independent) /DEF=Homo sapiens cDNA FLJ10428 fis, clone NT2RP1000376, highly similar to Homo sapiens mRNA; cDNA DKFZp434A102.
	237318_at	0.00512014	-1.2941	-0.371947	1.2941	down	-1.25847	-0.331673	1.25847	down	-1.14	-0.189032	1.14	down	-1.31601	-0.396168	1.31601	down	0.218375	-0.153572	-0.113298	0.0293434	-0.177793		Hs.664628	gb:AA677952 /DB_XREF=gi:2658474 /DB_XREF=zi14a06.s1 /CLONE=IMAGE:430738 /FEA=EST /CNT=6 /TID=Hs.120891.0 /TIER=ConsEnd /STK=5 /UG=Hs.120891 /UG_TITLE=ESTs
SKA3	227165_at	0.00512634	1.28039	0.356586	1.28039	up	1.17048	0.227095	1.17048	up	1.26926	0.343986	1.26926	up	1.43431	0.520357	1.43431	up	-0.224663	0.131923	0.00243274	0.119324	0.295694	221150	Hs.88523	gb:AI829603 /DB_XREF=gi:5450274 /DB_XREF=wf28h04.x1 /CLONE=IMAGE:2356951 /FEA=EST /CNT=43 /TID=Hs.88523.0 /TIER=Stack /STK=11 /UG=Hs.88523 /UG_TITLE=ESTs
BBS5	230697_at	0.00512772	1.02942	0.0418257	1.02942	up	1.07782	0.108118	1.07782	up	1.08843	0.122246	1.08843	up	1.13906	0.187846	1.13906	up	-0.0724609	-0.0306352	0.035657	0.0497846	0.115386	129880	Hs.233398	gb:AW418788 /DB_XREF=gi:6946720 /DB_XREF=hd17h02.x1 /CLONE=IMAGE:2909811 /FEA=EST /CNT=18 /TID=Hs.99148.0 /TIER=Stack /STK=11 /UG=Hs.99148 /UG_TITLE=ESTs, Weakly similar to S43569 R01H10.6 protein - Caenorhabditis elegans (C.elegans)
NOL4L	230955_s_at	0.00512794	1.00848	0.0121895	1.00848	up	-1.03909	-0.0553238	1.03909	down	1.0053	0.00762226	1.0053	up	1.18805	0.248601	1.18805	up	-0.0309527	-0.0187632	-0.0862765	-0.0233304	0.217649	140688	Hs.516978	gb:AL034550 /DB_XREF=gi:9187334 /FEA=DNA_2 /CNT=14 /TID=Hs.126373.0 /TIER=Stack /STK=13 /UG=Hs.126373 /UG_TITLE=Human DNA sequence from clone RP5-1184F4 on chromosome 20q11.1-11.23. Contains the 3 end of gene KIAA0978, two genes for novel proteins similar to nucleolar protein 4 (NOL4) (NOLP), and one or two novel genes. Contains ESTs, STSs, GSSs and three CpG islands /DEF=Human DNA sequence from …
LINC01448	1562982_at	0.0051332	1.0523	0.0735393	1.0523	up	1.10781	0.147711	1.10781	up	1.14031	0.189425	1.14031	up	1.09167	0.126538	1.09167	up	-0.10876	-0.0352204	0.0389515	0.0806651	0.0177784	101928795	Hs.566753	gb:BC040864.1 /DB_XREF=gi:26454750 /TID=Hs2.434350.1 /CNT=2 /FEA=mRNA /TIER=ConsEnd /STK=0 /UG=Hs.434350 /UG_TITLE=Homo sapiens, clone IMAGE:5541085, mRNA /DEF=Homo sapiens, clone IMAGE:5541085, mRNA.
TBC1D8B	238067_at	0.00520047	1.16087	0.215202	1.16087	up	1.39174	0.476892	1.39174	up	1.09314	0.128476	1.09314	up	1.11461	0.156545	1.11461	up	-0.129218	0.0859835	0.347674	-0.000742884	0.0273264	54885	Hs.351798	gb:AW172431 /DB_XREF=gi:6438379 /DB_XREF=xj38h06.x1 /CLONE=IMAGE:2659547 /FEA=EST /CNT=11 /TID=Hs.13012.0 /TIER=ConsEnd /STK=4 /UG=Hs.13012 /UG_TITLE=ESTs
ADAT3	1553968_a_at	0.00521267	1.03827	0.0541773	1.03827	up	-1.00878	-0.0126079	1.00878	down	1.04626	0.0652355	1.04626	up	1.14641	0.197126	1.14641	up	-0.0736391	-0.0194618	-0.086247	-0.00840367	0.123487	113179	Hs.144980	gb:BI524128 /DB_XREF=gi:15348920 /DB_XREF=603051536F1 /CLONE=IMAGE:5201312 /TID=Hs2.144980.1 /CNT=57 /FEA=FLmRNA /TIER=Stack /STK=20 /LL=113179 /UG_GENE=LOC113179 /UG=Hs.144980 /UG_TITLE=hypothetical protein BC011824 /FL=gb:BC011824.1 gb:NM_138422.1
MEIOC	1566480_x_at	0.00525747	-1.10338	-0.141935	1.10338	down	1.0256	0.0364633	1.0256	up	-1.13621	-0.184234	1.13621	down	-1.39553	-0.480808	1.39553	down	0.173999	0.0320637	0.210462	-0.0102352	-0.306809	284071	Hs.349758	gb:AK096357.1 /DB_XREF=gi:21755831 /TID=Hs2.378913.2 /CNT=1 /FEA=mRNA /TIER=ConsEnd /STK=0 /UG=Hs.378913 /UG_TITLE=Homo sapiens cDNA FLJ40428 fis, clone TESTI2039121. /DEF=Homo sapiens cDNA FLJ39038 fis, clone NT2RP7009267.
NHLRC2	235356_at	0.00529788	1.10606	0.145426	1.10606	up	1.08671	0.119966	1.08671	up	1.01538	0.0220139	1.01538	up	1.18428	0.244012	1.18428	up	-0.0708383	0.0745874	0.0491279	-0.0488244	0.173174	374354	Hs.369924	gb:AW297204 /DB_XREF=gi:6703840 /DB_XREF=UI-H-BW0-ajd-e-12-0-UI.s1 /CLONE=IMAGE:2731487 /FEA=EST /CNT=16 /TID=Hs.125811.0 /TIER=ConsEnd /STK=5 /UG=Hs.125811 /UG_TITLE=ESTs
LYST	1562511_at	0.00531167	1.07123	0.0992678	1.07123	up	1.46032	0.546284	1.46032	up	1.34138	0.423719	1.34138	up	1.13216	0.179074	1.13216	up	-0.317414	-0.218146	0.228871	0.106305	-0.138339	1130	Hs.532411	gb:AL833100.1 /DB_XREF=gi:21733691 /TID=Hs2.376915.1 /CNT=2 /FEA=mRNA /TIER=ConsEnd /STK=0 /UG=Hs.376915 /UG_TITLE=Homo sapiens mRNA; cDNA DKFZp313E0415 (from clone DKFZp313E0415) /DEF=Homo sapiens mRNA; cDNA DKFZp313E0415 (from clone DKFZp313E0415).
	1564547_x_at	0.00533738	-1.05046	-0.0710209	1.05046	down	1.03481	0.0493722	1.03481	up	-1.04587	-0.0647061	1.04587	down	-1.11042	-0.151108	1.11042	down	0.0509433	-0.0200775	0.100316	-0.0137627	-0.100165		Hs.542984	gb:BC007266.1 /DB_XREF=gi:13938277 /TID=Hs2.334566.1 /CNT=1 /FEA=mRNA /TIER=ConsEnd /STK=0 /UG=Hs.334566 /UG_TITLE=Homo sapiens, clone IMAGE:3138608, mRNA /DEF=Homo sapiens, clone IMAGE:3138608, mRNA.
RAB27A	209514_s_at	0.00534817	1.4889	0.574246	1.4889	up	1.75247	0.80939	1.75247	up	1.67865	0.747302	1.67865	up	1.56519	0.646335	1.56519	up	-0.665909	-0.091662	0.143482	0.0813935	-0.0195738	5873	Hs.654978	gb:BE502030 /DB_XREF=gi:9704438 /DB_XREF=hy11d05.x1 /CLONE=IMAGE:3197001 /FEA=FLmRNA /CNT=83 /TID=Hs.50477.1 /TIER=Stack /STK=12 /UG=Hs.50477 /LL=5873 /UG_GENE=RAB27A /UG_TITLE=RAB27A, member RAS oncogene family /FL=gb:U38654.3
LRRN3	209841_s_at	0.00537475	-1.84729	-0.885409	1.84729	down	-2.11449	-1.08031	2.11449	down	-1.739	-0.798255	1.739	down	-1.81582	-0.860619	1.81582	down	0.965148	0.0797382	-0.11516	0.166893	0.104529	54674	Hs.3781	gb:AL442092.1 /DB_XREF=gi:10241766 /GEN=DKFZp761K2424 /FEA=FLmRNA /CNT=66 /TID=Hs.3781.0 /TIER=FL+Stack /STK=11 /UG=Hs.3781 /LL=54674 /DEF=Homo sapiens mRNA; cDNA DKFZp761K2424 (from clone DKFZp761K2424); complete cds. /PROD=hypothetical protein /FL=gb:AL442092.1
	239885_at	0.00537695	-1.02231	-0.0318287	1.02231	down	1.29036	0.36777	1.29036	up	1.19742	0.259928	1.19742	up	1.20447	0.268404	1.20447	up	-0.173318	-0.205147	0.194452	0.0866093	0.0950859		Hs.741861	gb:AL555336 /DB_XREF=gi:12896973 /DB_XREF=AL555336 /CLONE=CS0DK007YO05 (5 prime) /FEA=EST /CNT=7 /TID=Hs.197698.0 /TIER=ConsEnd /STK=1 /UG=Hs.197698 /UG_TITLE=ESTs
MEIOC	1562484_at	0.00538779	1.11473	0.156693	1.11473	up	1.12512	0.170082	1.12512	up	1.09052	0.125014	1.09052	up	1.15385	0.20646	1.15385	up	-0.125826	0.0308662	0.0442554	-0.000811913	0.0806336	284071	Hs.349758	gb:BC041481.1 /DB_XREF=gi:27371102 /TID=Hs2.309103.3 /CNT=2 /FEA=mRNA /TIER=ConsEnd /STK=0 /LL=284071 /UG_GENE=FLJ35848 /UG=Hs.309103 /UG_TITLE=hypothetical protein FLJ35848 /DEF=Homo sapiens, clone IMAGE:5402642, mRNA, partial cds.
RAB27A	210951_x_at	0.00538862	1.46815	0.553996	1.46815	up	1.7565	0.812704	1.7565	up	1.62929	0.704241	1.62929	up	1.56404	0.645281	1.56404	up	-0.677392	-0.123396	0.135311	0.0268483	-0.0321111	5873	Hs.654978	gb:AF125393.1 /DB_XREF=gi:5410356 /FEA=FLmRNA /CNT=2 /TID=Hs.50477.2 /TIER=FL /STK=0 /UG=Hs.50477 /LL=5873 /UG_GENE=RAB27A /DEF=Homo sapiens Rab27 isoform mRNA, complete cds. /PROD=Rab27 isoform /FL=gb:AF125393.1
LCE1E	1559224_at	0.00539809	1.1281	0.173898	1.1281	up	1.20268	0.266249	1.20268	up	1.16882	0.225052	1.16882	up	1.01427	0.0204473	1.01427	up	-0.169207	0.00469123	0.0970421	0.0558459	-0.148759	353135	Hs.250236	gb:BC038391.1 /DB_XREF=gi:23468212 /TID=Hs2.250236.1 /CNT=6 /FEA=mRNA /TIER=ConsEnd /STK=0 /UG=Hs.250236 /UG_TITLE=Homo sapiens, clone IMAGE:4753444, mRNA /DEF=Homo sapiens, clone IMAGE:4753444, mRNA.
RASEF	1553186_x_at	0.00540889	1.02821	0.0401414	1.02821	up	1.74083	0.799772	1.74083	up	1.17958	0.238276	1.17958	up	-1.35917	-0.442725	1.35917	down	0.0105541	0.0506955	0.810326	0.24883	-0.43217	158158	Hs.129136	gb:NM_152573.1 /DB_XREF=gi:22749180 /TID=Hs2.351442.1 /CNT=9 /FEA=FLmRNA /TIER=FL /STK=1 /LL=158158 /UG_GENE=FLJ31614 /UG=Hs.351442 /UG_TITLE=hypothetical protein FLJ31614 /DEF=Homo sapiens hypothetical protein FLJ31614 (FLJ31614), mRNA. /FL=gb:NM_152573.1
	1570629_at	0.00549065	-1.00173	-0.00249138	1.00173	down	1.07364	0.102509	1.07364	up	1.02635	0.0375164	1.02635	up	-1.09185	-0.126769	1.09185	down	-0.0108875	-0.0133789	0.091621	0.0266289	-0.137657		Hs.684411	gb:BC022234.1 /DB_XREF=gi:21961399 /TID=Hs2.382312.1 /CNT=1 /FEA=mRNA /TIER=ConsEnd /STK=0 /UG=Hs.382312 /UG_TITLE=Homo sapiens, clone IMAGE:4401081, mRNA /DEF=Homo sapiens, clone IMAGE:4401081, mRNA.
LINC00597	208109_s_at	0.00549233	1.27295	0.348171	1.27295	up	1.41235	0.498101	1.41235	up	1.15099	0.202873	1.15099	up	1.04316	0.0609568	1.04316	up	-0.114386	0.233785	0.383715	0.0884872	-0.0534292	81698	Hs.656938	gb:NM_030944.1 /DB_XREF=gi:13569916 /GEN=C15ORF5 /FEA=FLmRNA /CNT=1 /TID=HsAffx.900133.191 /TIER=FL /STK=0 /DEF=Homo sapiens chromosome 15 open reading frame 5 (C15ORF5), mRNA. /PROD=chromosome 15 open reading frame 5 /FL=gb:NM_030944.1
TMEM150A	226239_at	0.00549987	-1.19297	-0.254553	1.19297	down	-1.35883	-0.442362	1.35883	down	-1.36481	-0.448699	1.36481	down	-1.2734	-0.348682	1.2734	down	0.332881	0.0783287	-0.109481	-0.115818	-0.0158007	129303	Hs.591559	gb:AL573722 /DB_XREF=gi:12933234 /DB_XREF=AL573722 /CLONE=CS0DI044YJ11 (3 prime) /FEA=EST /CNT=50 /TID=Hs.75458.1 /TIER=Stack /STK=30 /UG=Hs.75458 /LL=6141 /UG_GENE=RPL18 /UG_TITLE=ribosomal protein L18
	1560913_at	0.00550436	1.11415	0.155937	1.11415	up	1.08849	0.122322	1.08849	up	1.11373	0.155397	1.11373	up	1.21268	0.278201	1.21268	up	-0.116743	0.0391941	0.00557854	0.0386543	0.161458		Hs.521119	gb:AF086203.1 /DB_XREF=gi:3483548 /TID=Hs2.56025.1 /CNT=4 /FEA=mRNA /TIER=ConsEnd /STK=2 /UG=Hs.56025 /UG_TITLE=Homo sapiens full length insert cDNA clone ZC44D09 /DEF=Homo sapiens full length insert cDNA clone ZC44D09.
	217337_at	0.00551692	-1.18475	-0.244578	1.18475	down	-1.20596	-0.27018	1.20596	down	-1.17431	-0.231818	1.17431	down	-1.15009	-0.201747	1.15009	down	0.199078	-0.0455005	-0.0711027	-0.03274	-0.00266957			gb:AL021877 /DB_XREF=gi:3820976 /FEA=DNA /CNT=1 /TID=Hs.247772.0 /TIER=ConsEnd /STK=0 /UG=Hs.247772 /UG_TITLE=Human DNA sequence from clone RP1-101G11 on chromosome 22q12 Contains an ACO2 (Mitochondrial Aconitate Hydratase (Aconitase, Citrate Hydro-Lyase, EC 4.2.1.3)) pseudogene, ESTs, STSs, GSSs and a CpG islandn /DEF=Human DNA sequence from clone RP1-101G11 on chromosome 22q12 Contains an ACO2 …
PPP1R13B	216347_s_at	0.0055275	-1.22503	-0.292812	1.22503	down	-1.25851	-0.331712	1.25851	down	-1.20305	-0.266692	1.20305	down	-1.23241	-0.30148	1.23241	down	0.292673	-0.000138813	-0.0390391	0.0259808	-0.00880733	23368	Hs.709297	gb:AK023188.1 /DB_XREF=gi:10435002 /FEA=mRNA /CNT=1 /TID=Hs.6162.1 /TIER=ConsEnd /STK=0 /UG=Hs.6162 /LL=23368 /UG_GENE=KIAA0771 /UG_TITLE=KIAA0771 protein /DEF=Homo sapiens cDNA FLJ13126 fis, clone NT2RP3002909, weakly similar to P53-BINDING PROTEIN 2.
LOC105369889	236521_at	0.00555744	-1.05406	-0.0759541	1.05406	down	1.17406	0.231508	1.17406	up	1.11028	0.150924	1.11028	up	1.04901	0.0690321	1.04901	up	-0.071406	-0.14736	0.160102	0.0795177	-0.00237389	105369889		gb:BF196060 /DB_XREF=gi:11083586 /DB_XREF=hr81e06.x1 /CLONE=IMAGE:3134914 /FEA=EST /CNT=5 /TID=Hs.95034.0 /TIER=ConsEnd /STK=5 /UG=Hs.95034 /UG_TITLE=ESTs
LOC101927268///LOC102724851///LOC105374994	236353_at	0.00557318	-1.09419	-0.129864	1.09419	down	1.16025	0.214442	1.16025	up	-1.02594	-0.0369447	1.02594	down	-1.07823	-0.108666	1.07823	down	0.0574681	-0.0723961	0.27191	0.0205234	-0.0511979	101927268///102724851///105374994	Hs.640203	gb:AA766296 /DB_XREF=gi:2817534 /DB_XREF=oa28f07.s1 /CLONE=IMAGE:1306309 /FEA=EST /CNT=9 /TID=Hs.99200.0 /TIER=ConsEnd /STK=5 /UG=Hs.99200 /UG_TITLE=ESTs
VPS35	217727_x_at	0.00559668	1.10619	0.145604	1.10619	up	1.33081	0.412301	1.33081	up	1.06735	0.0940333	1.06735	up	1.06348	0.0887865	1.06348	up	-0.173521	-0.0279165	0.23878	-0.0794873	-0.0847342	55737	Hs.454528	gb:NM_018206.1 /DB_XREF=gi:8922645 /GEN=VPS35 /FEA=FLmRNA /CNT=418 /TID=Hs.264190.0 /TIER=FL+Stack /STK=99 /UG=Hs.264190 /LL=55737 /DEF=Homo sapiens vacuolar protein sorting 35 (yeast homolog) (VPS35), mRNA. /PROD=vacuolar protein sorting 35 (yeast homolog) /FL=gb:AF191298.2 gb:AF175265.1 gb:AL136888.1 gb:BC002414.1 gb:NM_018206.1 gb:AF183418.1 gb:AF186382.1
SREBF1	202308_at	0.00559745	-1.37121	-0.455453	1.37121	down	-1.22285	-0.290251	1.22285	down	-1.1961	-0.258341	1.1961	down	-1.16451	-0.219721	1.16451	down	0.213983	-0.24147	-0.0762677	-0.0443583	-0.00573845	6720	Hs.592123	gb:NM_004176.1 /DB_XREF=gi:4759167 /GEN=SREBF1 /FEA=FLmRNA /CNT=182 /TID=Hs.166.0 /TIER=FL+Stack /STK=83 /UG=Hs.166 /LL=6720 /DEF=Homo sapiens sterol regulatory element binding transcription factor 1 (SREBF1), mRNA. /PROD=sterol regulatory element binding transcriptionfactor 1 /FL=gb:U00968.1 gb:NM_004176.1
	240216_at	0.0056062	1.06076	0.085102	1.06076	up	1.2774	0.353215	1.2774	up	1.05762	0.0808189	1.05762	up	-1.03624	-0.0513534	1.03624	down	-0.0720088	0.0130933	0.281206	0.00881007	-0.123362		Hs.659543	gb:AI805550 /DB_XREF=gi:5392116 /DB_XREF=tx86e03.x1 /CLONE=IMAGE:2276476 /FEA=EST /CNT=4 /TID=Hs.199945.0 /TIER=ConsEnd /STK=4 /UG=Hs.199945 /UG_TITLE=ESTs
	1561596_at	0.00566666	-1.11069	-0.151458	1.11069	down	-1.06493	-0.0907604	1.06493	down	-1.0907	-0.125251	1.0907	down	-1.19048	-0.251538	1.19048	down	0.123037	-0.0284214	0.0322764	-0.002214	-0.128501		Hs.684421	gb:BI599467 /DB_XREF=gi:15492406 /DB_XREF=603246129F1 /CLONE=IMAGE:5288527 /TID=Hs2.373676.1 /CNT=2 /FEA=mRNA /TIER=ConsEnd /STK=1 /UG=Hs.373676 /UG_TITLE=Homo sapiens, clone IMAGE:5288527, mRNA
TCAF1	204403_x_at	0.00567841	-1.09127	-0.126006	1.09127	down	-1.04306	-0.0608231	1.04306	down	-1.14856	-0.199831	1.14856	down	-1.25369	-0.326181	1.25369	down	0.112392	-0.0136147	0.0515686	-0.087439	-0.213789	9747	Hs.744048	gb:NM_014719.1 /DB_XREF=gi:7662275 /GEN=KIAA0738 /FEA=FLmRNA /CNT=60 /TID=Hs.107479.0 /TIER=FL /STK=3 /UG=Hs.107479 /LL=9747 /DEF=Homo sapiens KIAA0738 gene product (KIAA0738), mRNA. /PROD=KIAA0738 gene product /FL=gb:AB018281.1 gb:NM_014719.1
CNTNAP4	232388_at	0.00570155	1.12873	0.174704	1.12873	up	1.11487	0.156869	1.11487	up	1.19124	0.25246	1.19124	up	1.14814	0.199303	1.14814	up	-0.134801	0.0399024	0.022068	0.117659	0.064502	85445	Hs.461389	gb:AB051550.1 /DB_XREF=gi:12698070 /GEN=KIAA1763 /FEA=mRNA /CNT=10 /TID=Hs.156829.0 /TIER=ConsEnd /STK=0 /UG=Hs.156829 /DEF=Homo sapiens mRNA for KIAA1763 protein, partial cds. /PROD=KIAA1763 protein
OFCC1	1565026_a_at	0.00571529	1.0107	0.0153509	1.0107	up	1.07602	0.105698	1.07602	up	1.05213	0.0733102	1.05213	up	1.05132	0.0722023	1.05132	up	-0.0484784	-0.0331275	0.05722	0.0248318	0.0237239	266553	Hs.532138	gb:AF548114.1 /DB_XREF=gi:24415869 /TID=Hs2.382068.12 /CNT=1 /FEA=mRNA /TIER=ConsEnd /STK=0 /LL=266553 /UG_GENE=MRDS1 /UG=Hs.382068 /UG_TITLE=MRDS1 /DEF=Homo sapiens orofacial clefting chromosomal breakpoint region 1 mRNA.
	237836_at	0.00571604	1.03367	0.0477773	1.03367	up	1.10716	0.146869	1.10716	up	1.03802	0.0538279	1.03802	up	-1.00037	-0.000536617	1.00037	down	-0.0337561	0.0140211	0.113113	0.0200718	-0.0342928		Hs.656747	gb:H02614 /DB_XREF=gi:865547 /DB_XREF=yj41e05.s1 /CLONE=IMAGE:151328 /FEA=EST /CNT=9 /TID=Hs.23603.0 /TIER=ConsEnd /STK=7 /UG=Hs.23603 /UG_TITLE=ESTs, Moderately similar to ALU8_HUMAN ALU SUBFAMILY SX SEQUENCE CONTAMINATION WARNING ENTRY (H.sapiens)
	1570298_at	0.00573974	1.13384	0.181213	1.13384	up	1.06724	0.0938867	1.06724	up	1.05545	0.0778647	1.05545	up	1.06184	0.0865674	1.06184	up	-0.0738813	0.107331	0.0200054	0.00398343	0.0126861			gb:BC014330.1 /DB_XREF=gi:15680032 /TID=Hs2.406370.1 /CNT=2 /FEA=mRNA /TIER=ConsEnd /STK=0 /UG=Hs.406370 /UG_TITLE=Homo sapiens, clone IMAGE:4042783, mRNA /DEF=Homo sapiens, clone IMAGE:4042783, mRNA.
RPS10P7	1566720_at	0.00577972	-1.15135	-0.203325	1.15135	down	-1.1653	-0.220701	1.1653	down	-1.14734	-0.198292	1.14734	down	-1.09358	-0.129063	1.09358	down	0.166729	-0.036596	-0.0539721	-0.0315626	0.0376667	376693	Hs.605989	gb:AK097932.1 /DB_XREF=gi:21757838 /TID=Hs2.350850.2 /CNT=1 /FEA=mRNA /TIER=ConsEnd /STK=0 /UG=Hs.350850 /UG_TITLE=Homo sapiens cDNA FLJ31028 fis, clone HLUNG2000570, weakly similar to 40S RIBOSOMAL PROTEIN S10. /DEF=Homo sapiens cDNA FLJ40613 fis, clone THYMU2012807.
MAGI1	215372_x_at	0.0057888	-1.1094	-0.149781	1.1094	down	-1.00523	-0.00752179	1.00523	down	-1.02807	-0.0399337	1.02807	down	-1.14945	-0.200945	1.14945	down	0.0480726	-0.101708	0.0405508	0.00813888	-0.152872	9223	Hs.476636	gb:AU146794 /DB_XREF=gi:11008315 /DB_XREF=AU146794 /CLONE=HEMBB1001536 /FEA=mRNA /CNT=5 /TID=Hs.287475.0 /TIER=ConsEnd /STK=2 /UG=Hs.287475 /UG_TITLE=Homo sapiens cDNA FLJ12002 fis, clone HEMBB1001536
MFAP3	1552312_a_at	0.00579268	1.46894	0.554777	1.46894	up	1.94828	0.962202	1.94828	up	1.65414	0.726084	1.65414	up	1.69069	0.757615	1.69069	up	-0.595761	-0.0409831	0.366441	0.130323	0.161855	4238	Hs.432818	gb:NM_005927.3 /DB_XREF=gi:21314642 /GEN=MFAP3 /TID=Hs2.28785.1 /CNT=30 /FEA=FLmRNA /TIER=FL+Stack /STK=8 /LL=4238 /UG=Hs.28785 /DEF=Homo sapiens microfibrillar-associated protein 3 (MFAP3), mRNA. /PROD=microfibrillar-associated protein 3 /FL=gb:NM_005927.3 gb:BC026244.1
MIR4697HG	229734_at	0.00579772	-1.12621	-0.171482	1.12621	down	-1.17157	-0.228443	1.17157	down	-1.14234	-0.191996	1.14234	down	-1.03315	-0.0470472	1.03315	down	0.153866	-0.0176154	-0.0745768	-0.0381295	0.106819	283174	Hs.504370	gb:BF507379 /DB_XREF=gi:11590686 /DB_XREF=UI-H-BW1-amx-e-10-0-UI.s1 /CLONE=IMAGE:3071347 /FEA=EST /CNT=22 /TID=Hs.141480.0 /TIER=Stack /STK=13 /UG=Hs.141480 /UG_TITLE=Homo sapiens mRNA; cDNA DKFZp434N079 (from clone DKFZp434N079)
DIO1	206457_s_at	0.00583349	1.08323	0.115341	1.08323	up	1.08342	0.115587	1.08342	up	1.10966	0.150122	1.10966	up	1.04731	0.066685	1.04731	up	-0.0715027	0.0438385	0.044084	0.0786192	-0.00481765	1733	Hs.251415	gb:NM_000792.2 /DB_XREF=gi:4557521 /GEN=DIO1 /FEA=FLmRNA /CNT=26 /TID=Hs.251415.0 /TIER=FL+Stack /STK=10 /UG=Hs.251415 /LL=1733 /DEF=Homo sapiens deiodinase, iodothyronine, type I (DIO1), mRNA. /PROD=thyroxine deiodinase type 1 /FL=gb:NM_000792.2
PLD1	177_at	0.00584048	1.17452	0.232074	1.17452	up	1.37192	0.4562	1.37192	up	1.24025	0.31063	1.24025	up	1.23247	0.301553	1.23247	up	-0.207198	0.0248757	0.249002	0.103431	0.0943546	5337	Hs.382865	U38545 /FEATURE= /DEFINITION=HSU38545 Human ARF-activated phosphatidylcholine-specific phospholipase D1a (hPLD1) mRNA, complete cds
ST18	206135_at	0.00591235	1.0139	0.0199114	1.0139	up	1.09552	0.131613	1.09552	up	1.04722	0.066565	1.04722	up	1.04937	0.0695303	1.04937	up	-0.0526412	-0.0327298	0.0789721	0.0139238	0.0168891	9705	Hs.655499	gb:NM_014682.1 /DB_XREF=gi:7662167 /GEN=KIAA0535 /FEA=FLmRNA /CNT=43 /TID=Hs.151449.0 /TIER=FL+Stack /STK=13 /UG=Hs.151449 /LL=9705 /DEF=Homo sapiens KIAA0535 gene product (KIAA0535), mRNA. /PROD=KIAA0535 gene product /FL=gb:NM_014682.1 gb:AB011107.1
TMSB15A	205347_s_at	0.00594182	1.3729	0.457226	1.3729	up	1.14155	0.19099	1.14155	up	1.3098	0.389348	1.3098	up	1.47546	0.561168	1.47546	up	-0.167111	0.290115	0.0238791	0.222237	0.394057	11013	Hs.56145	gb:NM_021992.1 /DB_XREF=gi:11496272 /GEN=TMSNB /FEA=FLmRNA /CNT=59 /TID=Hs.56145.0 /TIER=FL+Stack /STK=35 /UG=Hs.56145 /LL=11013 /DEF=Homo sapiens thymosin, beta, identified in neuroblastoma cells (TMSNB), mRNA. /PROD=thymosin, beta, identified in neuroblastomacells /FL=gb:NM_021992.1 gb:D82345.1 gb:BC000183.1
LYNX1	244224_x_at	0.00594724	-1.00556	-0.00799648	1.00556	down	1.07032	0.0980362	1.07032	up	1.1144	0.156273	1.1144	up	1.05375	0.0755337	1.05375	up	-0.0571282	-0.0651246	0.040908	0.099145	0.0184055	66004	Hs.604828	gb:AW449754 /DB_XREF=gi:6990530 /DB_XREF=UI-H-BI3-aks-d-09-0-UI.s1 /CLONE=IMAGE:2735296 /FEA=EST /CNT=3 /TID=Hs.158665.0 /TIER=ConsEnd /STK=3 /UG=Hs.158665 /UG_TITLE=ESTs
SNRNP70	213121_at	0.00595901	-1.15544	-0.208439	1.15544	down	-1.15156	-0.203592	1.15156	down	-1.21577	-0.281871	1.21577	down	-1.38057	-0.465267	1.38057	down	0.260692	0.0522536	0.0571	-0.0211786	-0.204574	6625	Hs.467097	gb:W67744 /DB_XREF=gi:1376836 /DB_XREF=zd39c08.s1 /CLONE=IMAGE:343022 /FEA=mRNA /CNT=47 /TID=Hs.174051.1 /TIER=Stack /STK=10 /UG=Hs.174051 /LL=6625 /UG_GENE=SNRP70 /UG_TITLE=small nuclear ribonucleoprotein 70kD polypeptide (RNP antigen)
	230268_at	0.00596836	1.09195	0.126913	1.09195	up	1.18129	0.240364	1.18129	up	1.13434	0.181857	1.13434	up	1.31248	0.392291	1.31248	up	-0.155114	-0.0282005	0.0852505	0.0267438	0.237177		Hs.498025	gb:BE503077 /DB_XREF=gi:9705485 /DB_XREF=hz83b11.x1 /CLONE=IMAGE:3214557 /FEA=EST /CNT=13 /TID=Hs.38516.0 /TIER=Stack /STK=8 /UG=Hs.38516 /UG_TITLE=ESTs, Weakly similar to A46302 PTB-associated splicing factor, long form (H.sapiens)
HTATIP2	229102_at	0.00597496	1.18758	0.248028	1.18758	up	1.05213	0.0733193	1.05213	up	1.18077	0.23973	1.18077	up	1.28002	0.356165	1.28002	up	-0.125804	0.122225	-0.0524844	0.113926	0.230361	10553	Hs.90753	gb:BG153401 /DB_XREF=gi:12665431 /DB_XREF=nad34d02.x1 /CLONE=IMAGE:3367346 /FEA=EST /CNT=22 /TID=Hs.90753.3 /TIER=Stack /STK=13 /UG=Hs.90753 /LL=10553 /UG_GENE=TIP30 /UG_TITLE=Tat-interacting protein (30kD)
USP35	229198_at	0.00598513	1.23912	0.309313	1.23912	up	1.29294	0.370653	1.29294	up	1.11141	0.152394	1.11141	up	1.18323	0.242726	1.18323	up	-0.155552	0.153761	0.215101	-0.00315865	0.0871734	57558	Hs.531249	gb:AB037793.1 /DB_XREF=gi:7243124 /GEN=KIAA1372 /FEA=mRNA /CNT=16 /TID=Hs.128867.0 /TIER=Stack /STK=8 /UG=Hs.128867 /LL=57558 /DEF=Homo sapiens mRNA for KIAA1372 protein, partial cds. /PROD=KIAA1372 protein
	215200_x_at	0.00599248	1.06623	0.092521	1.06623	up	1.07041	0.0981641	1.07041	up	-1.00704	-0.0101237	1.00704	down	-1.07848	-0.109006	1.07848	down	-0.0110462	0.0814748	0.087118	-0.0211699	-0.120052		Hs.663419	gb:AK022362.1 /DB_XREF=gi:10433744 /FEA=mRNA /CNT=5 /TID=Hs.287510.0 /TIER=ConsEnd /STK=0 /UG=Hs.287510 /UG_TITLE=Homo sapiens cDNA FLJ12300 fis, clone MAMMA1001854 /DEF=Homo sapiens cDNA FLJ12300 fis, clone MAMMA1001854.
LMOD3	1564469_at	0.00603306	-1.00918	-0.0131829	1.00918	down	1.0748	0.10407	1.0748	up	-1.00831	-0.0119375	1.00831	down	-1.03507	-0.049727	1.03507	down	-0.0033337	-0.0165166	0.100736	-0.0152712	-0.0530607	56203	Hs.350621	gb:AK057852.1 /DB_XREF=gi:16553815 /TID=Hs2.350621.3 /CNT=1 /FEA=mRNA /TIER=ConsEnd /STK=0 /LL=131744 /UG_GENE=LOC131744 /UG=Hs.350621 /UG_TITLE=hypothetical protein LOC131744 /DEF=Homo sapiens cDNA FLJ25123 fis, clone CBR06154.
FXR1	201635_s_at	0.00603996	1.19525	0.257311	1.19525	up	1.36198	0.445701	1.36198	up	1.1634	0.218351	1.1634	up	1.26231	0.336063	1.26231	up	-0.334586	-0.0772746	0.111115	-0.116235	0.00147724	8087	Hs.478407	gb:AI990766 /DB_XREF=gi:5837647 /DB_XREF=ws23e06.x1 /CLONE=IMAGE:2498050 /FEA=FLmRNA /CNT=210 /TID=Hs.82712.0 /TIER=Stack /STK=14 /UG=Hs.82712 /LL=8087 /UG_GENE=FXR1 /UG_TITLE=fragile X mental retardation, autosomal homolog 1 /FL=gb:U25165.1 gb:NM_005087.1
MPPED2	215692_s_at	0.0060879	1.05786	0.0811545	1.05786	up	1.02329	0.0332154	1.02329	up	1.0354	0.0501852	1.0354	up	-1.09213	-0.127144	1.09213	down	-0.0157118	0.0654426	0.0175036	0.0344734	-0.142855	744	Hs.289795	gb:BE645386 /DB_XREF=gi:9969697 /DB_XREF=7e80g06.x1 /CLONE=IMAGE:3288826 /FEA=DNA_1 /CNT=3 /TID=Hs.46638.2 /TIER=ConsEnd /STK=2 /UG=Hs.46638 /LL=744 /UG_GENE=C11ORF8 /UG_TITLE=chromosome 11 open reading frame 8
SLC38A7	228951_at	0.00612073	-1.23346	-0.302707	1.23346	down	-1.12422	-0.168924	1.12422	down	-1.27065	-0.345567	1.27065	down	-1.09182	-0.126733	1.09182	down	0.167904	-0.134803	-0.00102014	-0.177663	0.0411707	55238	Hs.10499	gb:AI631572 /DB_XREF=gi:4682902 /DB_XREF=wa99f04.x1 /CLONE=IMAGE:2304319 /FEA=EST /CNT=16 /TID=Hs.26944.1 /TIER=Stack /STK=15 /UG=Hs.26944 /LL=4900 /UG_GENE=NRGN /UG_TITLE=neurogranin (protein kinase C substrate, RC3)
HBS1L	209316_s_at	0.00615103	1.20984	0.274813	1.20984	up	1.39093	0.476048	1.39093	up	1.37034	0.454538	1.37034	up	1.33568	0.417578	1.33568	up	-0.378979	-0.104167	0.0970688	0.0755584	0.0385987	10767	Hs.378532	gb:BC001465.1 /DB_XREF=gi:12655212 /FEA=FLmRNA /CNT=112 /TID=Hs.221040.0 /TIER=FL /STK=1 /UG=Hs.221040 /LL=10767 /UG_GENE=HBS1L /DEF=Homo sapiens, HBS1 (S. cerevisiae)-like, clone MGC:1869, mRNA, complete cds. /PROD=HBS1 (S. cerevisiae)-like /FL=gb:BC001465.1 gb:U87791.1 gb:NM_006620.1
	215750_at	0.00615453	1.00007	9.99495e-05	1.00007	up	1.28854	0.365733	1.28854	up	1.10049	0.138142	1.10049	up	-1.00419	-0.00603732	1.00419	down	-0.124399	-0.124299	0.241334	0.0137429	-0.130436			gb:AB051446.1 /DB_XREF=gi:13359190 /GEN=KIAA1659 /FEA=mRNA /CNT=3 /TID=Hs.326758.0 /TIER=ConsEnd /STK=0 /UG=Hs.326758 /DEF=Homo sapiens mRNA for KIAA1659 protein, partial cds. /PROD=KIAA1659 protein
LTK	207106_s_at	0.00617698	-1.29391	-0.371734	1.29391	down	-1.42053	-0.506432	1.42053	down	-1.51288	-0.597296	1.51288	down	-1.46598	-0.551862	1.46598	down	0.453857	0.082123	-0.0525751	-0.143438	-0.098005	4058	Hs.434481	gb:NM_002344.1 /DB_XREF=gi:4505044 /GEN=LTK /FEA=FLmRNA /CNT=8 /TID=Hs.210.0 /TIER=FL /STK=3 /UG=Hs.210 /LL=4058 /DEF=Homo sapiens leukocyte tyrosine kinase (LTK), mRNA. /PROD=leukocyte tyrosine kinase /FL=gb:NM_002344.1
	239649_at	0.00617919	-1.10236	-0.140594	1.10236	down	-1.02165	-0.0309026	1.02165	down	-1.08783	-0.121448	1.08783	down	-1.11673	-0.159281	1.11673	down	0.089487	-0.0511071	0.0585845	-0.0319605	-0.069794			gb:AI817960 /DB_XREF=gi:5437029 /DB_XREF=wk26f06.x1 /CLONE=IMAGE:2413475 /FEA=EST /CNT=7 /TID=Hs.201265.0 /TIER=ConsEnd /STK=1 /UG=Hs.201265 /UG_TITLE=ESTs, Weakly similar to ALU1_HUMAN ALU SUBFAMILY J SEQUENCE CONTAMINATION WARNING ENTRY (H.sapiens)
	239963_at	0.00621844	1.109	0.149258	1.109	up	1.39712	0.482456	1.39712	up	1.07588	0.105519	1.07588	up	-1.19677	-0.259147	1.19677	down	-0.00334823	0.14591	0.479107	0.102171	-0.262495		Hs.126893	gb:BF196334 /DB_XREF=gi:11084168 /DB_XREF=7n68e07.x1 /CLONE=IMAGE:3569772 /FEA=EST /CNT=4 /TID=Hs.126893.0 /TIER=ConsEnd /STK=4 /UG=Hs.126893 /UG_TITLE=ESTs
TMEM241	244495_x_at	0.00622971	-1.06124	-0.0857496	1.06124	down	1.13138	0.178086	1.13138	up	-1.00307	-0.00442197	1.00307	down	-1.2278	-0.296075	1.2278	down	0.0505548	-0.0351948	0.228641	0.0461328	-0.24552	85019	Hs.137562	gb:AL521157 /DB_XREF=gi:12784650 /DB_XREF=AL521157 /CLONE=CS0DB001YI02 (3 prime) /FEA=EST /CNT=7 /TID=Hs.176067.0 /TIER=ConsEnd /STK=1 /UG=Hs.176067 /UG_TITLE=ESTs, Moderately similar to ALU1_HUMAN ALU SUBFAMILY J SEQUENCE CONTAMINATION WARNING ENTRY (H.sapiens)
ETNK1	219017_at	0.0062317	1.4347	0.520747	1.4347	up	1.44277	0.528844	1.44277	up	1.26821	0.342796	1.26821	up	1.43707	0.523128	1.43707	up	-0.368841	0.151906	0.160003	-0.0260455	0.154287	55500	Hs.29464	gb:NM_018638.2 /DB_XREF=gi:10092614 /GEN=EKI1 /FEA=FLmRNA /CNT=51 /TID=Hs.120439.0 /TIER=FL /STK=0 /UG=Hs.120439 /LL=55500 /DEF=Homo sapiens ethanolamine kinase (EKI1), mRNA. /PROD=ethanolamine kinase /FL=gb:NM_018638.2 gb:AF207600.2
ALG12	218444_at	0.00624333	-1.04737	-0.0667718	1.04737	down	-1.13902	-0.187789	1.13902	down	-1.25328	-0.325713	1.25328	down	-1.12556	-0.170637	1.12556	down	0.187797	0.121025	7.8943e-06	-0.137916	0.0171593	79087	Hs.526711	gb:NM_024105.1 /DB_XREF=gi:13129113 /GEN=MGC3136 /FEA=FLmRNA /CNT=81 /TID=Hs.77575.0 /TIER=FL+Stack /STK=36 /UG=Hs.77575 /LL=79087 /DEF=Homo sapiens hypothetical protein MGC3136 (MGC3136), mRNA. /PROD=hypothetical protein MGC3136 /FL=gb:BC001729.1 gb:NM_024105.1
TBX3	225544_at	0.00626315	1.08573	0.118659	1.08573	up	1.02032	0.0290253	1.02032	up	1.1133	0.154841	1.1133	up	1.02548	0.0363049	1.02548	up	-0.0603274	0.0583316	-0.0313021	0.0945139	-0.0240224	6926	Hs.744016	gb:AI806338 /DB_XREF=gi:5392904 /DB_XREF=wf07f09.x1 /CLONE=IMAGE:2349929 /FEA=FLmRNA /CNT=111 /TID=Hs.267182.0 /TIER=Stack /STK=35 /UG=Hs.267182 /LL=6926 /UG_GENE=TBX3 /UG_TITLE=T-box 3 (ulnar mammary syndrome) /FL=gb:AF170708.2 gb:NM_005996.1
TRO	210882_s_at	0.00626474	1.05971	0.0836725	1.05971	up	1.08888	0.122844	1.08888	up	1.00607	0.00872969	1.00607	up	-1.02634	-0.0375079	1.02634	down	-0.0346026	0.0490699	0.0882418	-0.0258729	-0.0721105	7216	Hs.633653	gb:U04811.1 /DB_XREF=gi:905357 /FEA=FLmRNA /CNT=2 /TID=Hs.259802.1 /TIER=FL /STK=0 /UG=Hs.259802 /LL=7216 /UG_GENE=TRO /DEF=Human trophinin mRNA, complete cds. /PROD=trophinin /FL=gb:U04811.1
SATB2	213435_at	0.00626563	1.01899	0.0271464	1.01899	up	1.35133	0.434382	1.35133	up	1.12593	0.171115	1.12593	up	1.20635	0.270647	1.20635	up	-0.158112	-0.130965	0.27627	0.0130038	0.112536	23314	Hs.516617	gb:AB028957.1 /DB_XREF=gi:5689404 /GEN=KIAA1034 /FEA=mRNA /CNT=66 /TID=Hs.12896.0 /TIER=Stack /STK=12 /UG=Hs.12896 /LL=23314 /DEF=Homo sapiens mRNA for KIAA1034 protein, partial cds. /PROD=KIAA1034 protein
	233908_x_at	0.00626712	1.00745	0.0107054	1.00745	up	1.10525	0.144372	1.10525	up	1.01458	0.0208784	1.01458	up	-1.0091	-0.0130681	1.0091	down	-0.0336943	-0.0229889	0.110678	-0.0128159	-0.0467624		Hs.636417	gb:AK022112.1 /DB_XREF=gi:10433435 /FEA=mRNA /CNT=2 /TID=Hs.245389.0 /TIER=ConsEnd /STK=0 /UG=Hs.245389 /UG_TITLE=Homo sapiens cDNA FLJ12050 fis, clone HEMBB1002002 /DEF=Homo sapiens cDNA FLJ12050 fis, clone HEMBB1002002.
HIVEP3	233884_at	0.00627728	-1.11682	-0.159403	1.11682	down	-1.12058	-0.164245	1.12058	down	-1.14417	-0.194307	1.14417	down	-1.14854	-0.199805	1.14854	down	0.153399	-0.00600455	-0.010846	-0.0409086	-0.046406	59269	Hs.403972///Hs.648369	gb:AL512747.1 /DB_XREF=gi:12224963 /FEA=mRNA /CNT=2 /TID=Hs.254127.0 /TIER=ConsEnd /STK=1 /UG=Hs.254127 /UG_TITLE=Homo sapiens mRNA; cDNA DKFZp547O054 (from clone DKFZp547O054) /DEF=Homo sapiens mRNA; cDNA DKFZp547O054 (from clone DKFZp547O054).
ADGB	220614_s_at	0.00629652	-1.01988	-0.0284021	1.01988	down	-1.0156	-0.0223284	1.0156	down	1.04392	0.0620147	1.04392	up	1.06211	0.0869299	1.06211	up	-0.00973755	-0.0381397	-0.0320659	0.0522772	0.0771924	79747	Hs.720870	gb:NM_024694.1 /DB_XREF=gi:13375974 /GEN=FLJ23121 /FEA=FLmRNA /CNT=10 /TID=Hs.98912.0 /TIER=FL /STK=4 /UG=Hs.98912 /LL=79747 /DEF=Homo sapiens hypothetical protein FLJ23121 (FLJ23121), mRNA. /PROD=hypothetical protein FLJ23121 /FL=gb:NM_024694.1
ABCG1	204567_s_at	0.00629779	-1.93515	-0.952448	1.93515	down	-2.20457	-1.1405	2.20457	down	-1.4439	-0.529976	1.4439	down	-1.85783	-0.893622	1.85783	down	0.82921	-0.123238	-0.311287	0.299234	-0.0644117	9619	Hs.124649	gb:NM_004915.2 /DB_XREF=gi:8051574 /GEN=ABCG1 /FEA=FLmRNA /CNT=61 /TID=Hs.10237.0 /TIER=FL+Stack /STK=25 /UG=Hs.10237 /LL=9619 /DEF=Homo sapiens ATP-binding cassette, sub-family G (WHITE), member 1 (ABCG1), transcript variant 1, mRNA. /PROD=ATP-binding cassette sub-family G member 1isoform a /FL=gb:NM_004915.2
CALM2///CALM3	200622_x_at	0.00631608	1.26952	0.344288	1.26952	up	1.27626	0.351927	1.27626	up	1.33641	0.418363	1.33641	up	1.41313	0.498896	1.41313	up	-0.309025	0.0352624	0.042902	0.109338	0.18987	805///808	Hs.515487	gb:AV685208 /DB_XREF=gi:10287071 /DB_XREF=AV685208 /CLONE=GKCCXA06 /FEA=FLmRNA /CNT=479 /TID=Hs.141011.0 /TIER=Stack /STK=17 /UG=Hs.141011 /LL=808 /UG_GENE=CALM3 /UG_TITLE=calmodulin 3 (phosphorylase kinase, delta) /FL=gb:BC005137.1 gb:J04046.1 gb:NM_005184.1
TOM1L2	226198_at	0.00632365	-1.31704	-0.3973	1.31704	down	-1.13019	-0.176572	1.13019	down	-1.20762	-0.272171	1.20762	down	-1.16512	-0.220483	1.16512	down	0.219937	-0.177363	0.043365	-0.0522341	-0.000546503	146691	Hs.462379	gb:AV751731 /DB_XREF=gi:10909579 /DB_XREF=AV751731 /CLONE=NPDAXE07 /FEA=mRNA /CNT=55 /TID=Hs.8125.0 /TIER=Stack /STK=41 /UG=Hs.8125 /UG_TITLE=Homo sapiens mRNA; cDNA DKFZp586E1521 (from clone DKFZp586E1521); partial cds
	242380_at	0.00632698	-1.28256	-0.359029	1.28256	down	-1.18542	-0.245402	1.18542	down	-1.19125	-0.252478	1.19125	down	-1.21046	-0.27556	1.21046	down	0.252598	-0.106431	0.00719669	0.000120023	-0.0229612		Hs.657183	gb:AA283816 /DB_XREF=gi:1928380 /DB_XREF=zs49d10.s1 /CLONE=IMAGE:700819 /FEA=EST /CNT=7 /TID=Hs.125113.0 /TIER=ConsEnd /STK=2 /UG=Hs.125113 /UG_TITLE=ESTs
IMMP2L	227153_at	0.00633377	-1.35009	-0.433051	1.35009	down	-1.33359	-0.415314	1.33359	down	-1.37329	-0.457634	1.37329	down	-1.20533	-0.269423	1.20533	down	0.386849	-0.0462027	-0.0284648	-0.0707856	0.117426	83943	Hs.731706	gb:AI784580 /DB_XREF=gi:5326389 /DB_XREF=ta02b09.x1 /CLONE=IMAGE:2042873 /FEA=EST /CNT=42 /TID=Hs.89576.1 /TIER=Stack /STK=11 /UG=Hs.89576 /LL=162 /UG_GENE=AP1B1 /UG_TITLE=adaptor-related protein complex 1, beta 1 subunit
ZDHHC11///ZDHHC11B	221646_s_at	0.0063639	-1.22679	-0.294884	1.22679	down	-1.28257	-0.359039	1.28257	down	-1.21935	-0.286109	1.21935	down	-1.40797	-0.49362	1.40797	down	0.32225	0.0273665	-0.0367891	0.0361409	-0.17137	79844///653082	Hs.654874///Hs.732788	gb:AF267859.1 /DB_XREF=gi:12006044 /FEA=FLmRNA /CNT=4 /TID=Hs.323820.0 /TIER=FL /STK=2 /UG=Hs.323820 /DEF=Homo sapiens GL013 mRNA, complete cds. /PROD=GL013 /FL=gb:AF267859.1
TMC8	242644_at	0.00638188	-1.27829	-0.354219	1.27829	down	-1.39503	-0.4803	1.39503	down	-1.3703	-0.454492	1.3703	down	-1.43239	-0.518426	1.43239	down	0.345399	-0.00881932	-0.134901	-0.109092	-0.173026	147138		gb:BE676000 /DB_XREF=gi:10036541 /DB_XREF=7f19h09.x1 /CLONE=IMAGE:3295169 /FEA=EST /CNT=5 /TID=Hs.283364.0 /TIER=ConsEnd /STK=2 /UG=Hs.283364 /UG_TITLE=ESTs, Moderately similar to ALU7_HUMAN ALU SUBFAMILY SQ SEQUENCE CONTAMINATION WARNING ENTRY (H.sapiens)
HP///HPR	208470_s_at	0.00641127	1.95874	0.969929	1.95874	up	2.79501	1.48286	2.79501	up	2.27843	1.18804	2.27843	up	2.57536	1.36478	2.57536	up	-1.1509	-0.180975	0.331951	0.0371369	0.213871	3240///3250	Hs.513711///Hs.655361///Hs.702099	gb:NM_020995.1 /DB_XREF=gi:10337588 /GEN=HPR /FEA=FLmRNA /CNT=12 /TID=Hs.328822.0 /TIER=FL /STK=0 /UG=Hs.328822 /LL=3250 /DEF=Homo sapiens haptoglobin-related protein (HPR), mRNA. /PROD=haptoglobin-related protein /FL=gb:NM_020995.1
PCNXL2	39650_s_at	0.0064199	-1.20946	-0.274357	1.20946	down	-1.31547	-0.395573	1.31547	down	-1.23262	-0.301732	1.23262	down	-1.23506	-0.304586	1.23506	down	0.286398	0.0120402	-0.109176	-0.015334	-0.0181882	80003	Hs.370605	Cluster Incl. AB007895:Homo sapiens KIAA0435 mRNA, complete cds /cds=(1195,3528) /gb=AB007895 /gi=2662150 /ug=Hs.31438 /len=5347
CUL7	241746_at	0.00643818	-1.00018	-0.000255413	1.00018	down	-1.03189	-0.0452934	1.03189	down	-1.11611	-0.158475	1.11611	down	-1.14542	-0.195874	1.14542	down	0.0693533	0.0690978	0.0240599	-0.0891217	-0.12652	9820	Hs.520136	gb:AW081304 /DB_XREF=gi:6036456 /DB_XREF=xc30e03.x1 /CLONE=IMAGE:2585788 /FEA=EST /CNT=6 /TID=Hs.157710.0 /TIER=ConsEnd /STK=1 /UG=Hs.157710 /UG_TITLE=ESTs, Highly similar to Y076_HUMAN HYPOTHETICAL PROTEIN KIAA0076 (H.sapiens)
CLCN7	221961_at	0.00647491	-1.2185	-0.285102	1.2185	down	-1.17304	-0.230249	1.17304	down	-1.27117	-0.346155	1.27117	down	-1.36174	-0.445449	1.36174	down	0.221896	-0.0632059	-0.00835284	-0.124258	-0.223553	1186		gb:AW190208 /DB_XREF=gi:6464688 /DB_XREF=xl60a12.x1 /CLONE=IMAGE:2679070 /FEA=EST /CNT=27 /TID=Hs.233789.0 /TIER=Stack /STK=26 /UG=Hs.233789 /UG_TITLE=ESTs
SCML4	1556471_at	0.00649431	-1.34763	-0.430429	1.34763	down	-1.52525	-0.609044	1.52525	down	-1.31424	-0.39423	1.31424	down	-1.21518	-0.281169	1.21518	down	0.383915	-0.0465138	-0.225129	-0.0103148	0.102746	256380	Hs.486109	gb:CA448477 /DB_XREF=gi:24812897 /DB_XREF=UI-H-EI0-ayl-e-13-0-UI.s1 /CLONE=UI-H-EI0-ayl-e-13-0-UI /TID=Hs2.202248.1 /CNT=4 /FEA=mRNA /TIER=ConsEnd /STK=3 /UG=Hs.202248 /UG_TITLE=Homo sapiens cDNA FLJ36252 fis, clone THYMU2002109, moderately similar to Homo sapiens Sex comb on midleg homolog 1 isoform 1.
TECTB	1553656_at	0.00650033	1.11098	0.151826	1.11098	up	1.15125	0.203203	1.15125	up	1.17844	0.236883	1.17844	up	1.14785	0.198934	1.14785	up	-0.156149	-0.0043229	0.0470536	0.0807336	0.0427844	6975	Hs.348615	gb:NM_058222.1 /DB_XREF=gi:17158034 /GEN=TECTB /TID=Hs2.348615.1 /CNT=4 /FEA=FLmRNA /TIER=FL /STK=1 /LL=6975 /UG=Hs.348615 /DEF=Homo sapiens tectorin beta (TECTB), mRNA. /PROD=tectorin beta /FL=gb:AF312827.1 gb:NM_058222.1
LMO2	231049_at	0.00650789	2.4709	1.30504	2.4709	up	1.95132	0.964453	1.95132	up	1.71757	0.780368	1.71757	up	1.59773	0.676027	1.59773	up	-0.403745	0.901291	0.560708	0.376622	0.272282	4005		gb:AI052253 /DB_XREF=gi:3308244 /DB_XREF=oz21c12.x1 /CLONE=IMAGE:1675990 /FEA=EST /CNT=13 /TID=Hs.128746.0 /TIER=Stack /STK=9 /UG=Hs.128746 /UG_TITLE=ESTs
GUSBP1///GUSBP4///LINC00680///LOC101929200	226947_at	0.00650935	-1.48744	-0.572831	1.48744	down	-1.35302	-0.436188	1.35302	down	-1.42622	-0.5122	1.42622	down	-1.35059	-0.433594	1.35059	down	0.355754	-0.217077	-0.0804335	-0.156445	-0.0778398	375513///728411///101929200///106660612	Hs.88181	gb:AW001628 /DB_XREF=gi:5848544 /DB_XREF=ws01g11.x1 /CLONE=IMAGE:2495972 /FEA=mRNA /CNT=36 /TID=Hs.56406.0 /TIER=Stack /STK=16 /UG=Hs.56406 /UG_TITLE=Homo sapiens cDNA FLJ13549 fis, clone PLACE1007097
UNC13C	1556095_at	0.00651841	1.01751	0.0250495	1.01751	up	1.01332	0.0190876	1.01332	up	1.0624	0.0873248	1.0624	up	1.08956	0.123746	1.08956	up	-0.0315943	-0.00654472	-0.0125066	0.0557305	0.0921515	440279	Hs.657273	gb:AL834407.1 /DB_XREF=gi:21740107 /TID=Hs2.112921.1 /CNT=21 /FEA=mRNA /TIER=ConsEnd /STK=6 /LL=145790 /UG_GENE=DKFZp547H074 /UG=Hs.112921 /UG_TITLE=Munc13-3 /DEF=Homo sapiens mRNA; cDNA DKFZp547H074 (from clone DKFZp547H074).
RNF146	221430_s_at	0.00652398	1.32968	0.411077	1.32968	up	1.77381	0.826851	1.77381	up	1.48892	0.574265	1.48892	up	1.40082	0.486268	1.40082	up	-0.500899	-0.089821	0.325953	0.0733661	-0.0146301	81847	Hs.267120	gb:NM_030963.1 /DB_XREF=gi:13624336 /GEN=DKFZP434O1427 /FEA=FLmRNA /CNT=1 /TID=HsAffx.900164.1093 /TIER=FL /STK=0 /DEF=Homo sapiens hypothetical protein DKFZp434O1427 (DKFZP434O1427), mRNA. /PROD=hypothetical protein DKFZp434O1427 /FL=gb:NM_030963.1
METAP1D	1569029_at	0.00653398	-1.04191	-0.0592252	1.04191	down	-1.17464	-0.23222	1.17464	down	-1.1404	-0.189538	1.1404	down	-1.14176	-0.191254	1.14176	down	0.159207	0.099982	-0.0730128	-0.0303307	-0.0320467	254042		gb:AA442226 /DB_XREF=gi:2154104 /DB_XREF=zv60h02.r1 /CLONE=IMAGE:758067 /TID=Hs2.406338.1 /CNT=18 /FEA=mRNA /TIER=ConsEnd /STK=0 /UG=Hs.406338 /UG_TITLE=Homo sapiens, Similar to methionine aminopeptidase-like 1, clone IMAGE:5184200, mRNA
	235594_at	0.00653648	-1.2363	-0.306024	1.2363	down	-1.17692	-0.235017	1.17692	down	-1.21914	-0.285867	1.21914	down	-1.24971	-0.321596	1.24971	down	0.220978	-0.0850457	-0.0140387	-0.0648895	-0.100618		Hs.733407	gb:AL542578 /DB_XREF=gi:12874760 /DB_XREF=AL542578 /CLONE=CS0DE012YF14 (5 prime) /FEA=EST /CNT=15 /TID=Hs.105656.0 /TIER=ConsEnd /STK=0 /UG=Hs.105656 /UG_TITLE=ESTs
GAS2	205848_at	0.00654315	1.05254	0.0738723	1.05254	up	1.05407	0.0759711	1.05407	up	1.11713	0.159793	1.11713	up	1.08934	0.123453	1.08934	up	-0.0859549	-0.0120826	-0.00998377	0.0738386	0.0374979	2620	Hs.711297	gb:NM_005256.1 /DB_XREF=gi:4885252 /GEN=GAS2 /FEA=FLmRNA /CNT=26 /TID=Hs.129818.0 /TIER=FL+Stack /STK=11 /UG=Hs.129818 /LL=2620 /DEF=Homo sapiens growth arrest-specific 2 (GAS2), mRNA. /PROD=growth arrest-specific 2 /FL=gb:NM_005256.1 gb:U95032.1
LOC100130285	1562799_at	0.00654625	1.1343	0.181807	1.1343	up	1.073	0.101646	1.073	up	1.12932	0.17545	1.12932	up	1.1844	0.244155	1.1844	up	-0.149403	0.0324039	-0.0477564	0.0260477	0.0947521	100130285	Hs.730224	gb:AK097604.1 /DB_XREF=gi:21757425 /TID=Hs2.375999.1 /CNT=2 /FEA=mRNA /TIER=ConsEnd /STK=0 /UG=Hs.375999 /UG_TITLE=Homo sapiens cDNA FLJ40285 fis, clone TESTI2027820. /DEF=Homo sapiens cDNA FLJ40285 fis, clone TESTI2027820.
	224254_x_at	0.00656886	-1.078	-0.108352	1.078	down	1.2656	0.339818	1.2656	up	1.04638	0.065412	1.04638	up	-1.25263	-0.324961	1.25263	down	0.0257361	-0.0826161	0.365554	0.0911481	-0.299225			gb:AF116695.1 /DB_XREF=gi:7959888 /FEA=FLmRNA /CNT=1 /TID=Hs.296442.0 /TIER=FL /STK=0 /UG=Hs.296442 /LL=55882 /UG_GENE=PRO2221 /DEF=Homo sapiens PRO2221 mRNA, complete cds. /PROD=PRO2221 /FL=gb:AF116695.1
LOC101928933	1568832_a_at	0.006576	1.14316	0.193033	1.14316	up	1.20185	0.265262	1.20185	up	1.16597	0.221534	1.16597	up	1.14813	0.19928	1.14813	up	-0.167819	0.0252136	0.097443	0.0537144	0.031461	101928933	Hs.171092	gb:BC039325.1 /DB_XREF=gi:25058192 /TID=Hs2.171092.1 /CNT=5 /FEA=mRNA /TIER=ConsEnd /STK=1 /UG=Hs.171092 /UG_TITLE=Homo sapiens, clone IMAGE:5267251, mRNA /DEF=Homo sapiens, clone IMAGE:5267251, mRNA.
	1565614_at	0.00659191	-1.02007	-0.0286698	1.02007	down	-1.07326	-0.102001	1.07326	down	-1.08866	-0.122552	1.08866	down	-1.12418	-0.168871	1.12418	down	0.0819918	0.053322	-0.0200088	-0.0405604	-0.0868791		Hs.654696	gb:BG430133 /DB_XREF=gi:13336639 /DB_XREF=602495110F1 /CLONE=IMAGE:4608722 /TID=Hs2.257016.1 /CNT=20 /FEA=mRNA /TIER=ConsEnd /STK=0 /UG=Hs.257016 /UG_TITLE=Homo sapiens cDNA FLJ34061 fis, clone FCBBF3000462.
AFF4	243487_at	0.00659208	1.07179	0.100023	1.07179	up	1.25032	0.322301	1.25032	up	1.16623	0.221852	1.16623	up	1.30041	0.378966	1.30041	up	-0.172933	-0.0729092	0.149368	0.0489189	0.206033	27125	Hs.519313	gb:AV652437 /DB_XREF=gi:9873451 /DB_XREF=AV652437 /CLONE=GLCDAD02 /FEA=EST /CNT=6 /TID=Hs.282908.0 /TIER=ConsEnd /STK=3 /UG=Hs.282908 /UG_TITLE=ESTs
ZNF175	205497_at	0.00663003	-1.22521	-0.293023	1.22521	down	-1.26283	-0.33666	1.26283	down	-1.26137	-0.334991	1.26137	down	-1.07722	-0.107311	1.07722	down	0.221676	-0.0713473	-0.114985	-0.113316	0.114364	7728	Hs.119014	gb:NM_007147.1 /DB_XREF=gi:6005969 /GEN=ZNF175 /FEA=FLmRNA /CNT=34 /TID=Hs.119014.0 /TIER=FL+Stack /STK=8 /UG=Hs.119014 /LL=7728 /DEF=Homo sapiens zinc finger protein 175 (ZNF175), mRNA. /PROD=zinc finger protein 175 /FL=gb:D50419.1 gb:NM_007147.1
ZNF705G	237711_at	0.00663084	1.03539	0.0501691	1.03539	up	1.04647	0.0655262	1.04647	up	-1.05574	-0.0782514	1.05574	down	1.01705	0.0243955	1.01705	up	-0.000856146	0.049313	0.0646701	-0.0791075	0.0235394	100131980	Hs.528391	gb:BF509407 /DB_XREF=gi:11592630 /DB_XREF=UI-H-BI4-aoy-d-05-0-UI.s1 /CLONE=IMAGE:3086624 /FEA=EST /CNT=5 /TID=Hs.252776.0 /TIER=ConsEnd /STK=5 /UG=Hs.252776 /UG_TITLE=ESTs, Weakly similar to S10397 finger protein kox1 (H.sapiens)
SUPT3H	211106_at	0.0066334	-1.29074	-0.368204	1.29074	down	-1.23335	-0.302584	1.23335	down	-1.21926	-0.286004	1.21926	down	-1.22803	-0.296351	1.22803	down	0.310059	-0.0581449	0.00747524	0.0240549	0.0137079	8464		gb:AF064804.1 /DB_XREF=gi:3283361 /GEN=SUPT3H /FEA=FLmRNA /CNT=1 /TID=Hs.96757.1 /TIER=FL /STK=0 /UG=Hs.96757 /LL=8464 /DEF=Homo sapiens transcription factor SUPT3H (SUPT3H) mRNA, complete cds. /PROD=transcription factor SUPT3H /FL=gb:AF064804.1
LOC100996732	242133_s_at	0.00663875	-1.07986	-0.110848	1.07986	down	-1.02075	-0.0296294	1.02075	down	-1.14229	-0.191926	1.14229	down	-1.22758	-0.295813	1.22758	down	0.139877	0.0290287	0.110247	-0.0520493	-0.155936	100996732		gb:AA630955 /DB_XREF=gi:2553566 /DB_XREF=nq76a04.s1 /CLONE=IMAGE:1158222 /FEA=EST /CNT=5 /TID=Hs.137158.0 /TIER=ConsEnd /STK=3 /UG=Hs.137158 /UG_TITLE=ESTs
LOC101930370	1557878_at	0.00665812	1.01435	0.0205561	1.01435	up	-1.03347	-0.0474897	1.03347	down	1.06916	0.0964842	1.06916	up	1.07328	0.102031	1.07328	up	-0.0351053	-0.0145491	-0.082595	0.061379	0.0669255	101930370	Hs.563191	gb:BC040577.1 /DB_XREF=gi:26252008 /TID=Hs2.365191.1 /CNT=3 /FEA=mRNA /TIER=ConsEnd /STK=1 /UG=Hs.365191 /UG_TITLE=Homo sapiens, clone IMAGE:5267797, mRNA /DEF=Homo sapiens, clone IMAGE:5267797, mRNA.
CAPZB	201949_x_at	0.00666733	1.20659	0.27094	1.20659	up	1.29008	0.367464	1.29008	up	1.21874	0.285389	1.21874	up	1.20275	0.266337	1.20275	up	-0.277389	-0.00644928	0.0900754	0.00799987	-0.0110521	832	Hs.432760	gb:AL572341 /DB_XREF=gi:12930514 /DB_XREF=AL572341 /CLONE=CS0DI007YC13 (3 prime) /FEA=FLmRNA /CNT=192 /TID=Hs.76368.0 /TIER=Stack /STK=76 /UG=Hs.76368 /LL=832 /UG_GENE=CAPZB /UG_TITLE=capping protein (actin filament) muscle Z-line, beta /FL=gb:U03271.1 gb:NM_004930.1
GPR85	234303_s_at	0.00670723	1.12168	0.165656	1.12168	up	1.13698	0.185208	1.13698	up	1.01779	0.025436	1.01779	up	1.06834	0.0953758	1.06834	up	-0.0602958	0.10536	0.124912	-0.0348599	0.03508	54329	Hs.152009	gb:AL161959.1 /DB_XREF=gi:7328012 /GEN=DKFZp761L08121 /FEA=mRNA /CNT=1 /TID=Hs.152009.1 /TIER=ConsEnd /STK=0 /UG=Hs.152009 /LL=54329 /DEF=Homo sapiens mRNA; cDNA DKFZp761L08121 (from clone DKFZp761L08121); partial cds. /PROD=hypothetical protein
HK3	205936_s_at	0.00671108	1.66429	0.73491	1.66429	up	1.99912	0.999362	1.99912	up	1.57992	0.659853	1.57992	up	1.41883	0.504698	1.41883	up	-0.488499	0.246411	0.510863	0.171354	0.0161983	3101	Hs.411695	gb:NM_002115.1 /DB_XREF=gi:4504394 /GEN=HK3 /FEA=FLmRNA /CNT=20 /TID=Hs.159237.0 /TIER=FL /STK=7 /UG=Hs.159237 /LL=3101 /DEF=Homo sapiens hexokinase 3 (white cell) (HK3), mRNA. /PROD=hexokinase 3 (white cell) /FL=gb:NM_002115.1 gb:U51333.1
KIAA1109	216294_s_at	0.00673875	1.43458	0.520632	1.43458	up	1.66778	0.737925	1.66778	up	1.38934	0.474397	1.38934	up	1.26272	0.336534	1.26272	up	-0.496281	0.0243512	0.241644	-0.0218842	-0.159747	84162	Hs.408142	gb:AL137254.1 /DB_XREF=gi:6807676 /GEN=DKFZp434B1113 /FEA=mRNA /CNT=3 /TID=Hs.6606.2 /TIER=ConsEnd /STK=0 /UG=Hs.6606 /LL=23364 /DEF=Homo sapiens mRNA; cDNA DKFZp434B1113 (from clone DKFZp434B1113); partial cds. /PROD=hypothetical protein
SDHC	210131_x_at	0.00674069	1.44454	0.530611	1.44454	up	1.50925	0.593829	1.50925	up	1.36966	0.453818	1.36966	up	1.48876	0.57411	1.48876	up	-0.447966	0.0826443	0.145863	0.0058513	0.126143	6391	Hs.444472	gb:D49737.1 /DB_XREF=gi:2588778 /FEA=FLmRNA /CNT=18 /TID=Hs.3577.1 /TIER=FL /STK=0 /UG=Hs.3577 /LL=6391 /UG_GENE=SDHC /DEF=Homo sapiens mRNA for cytochrome b large subunit of complex II, complete cds. /PROD=cytochrome b large subunit of complex II /FL=gb:D49737.1
TNPO1	209226_s_at	0.00676837	1.1265	0.171843	1.1265	up	1.31206	0.391829	1.31206	up	1.28496	0.361729	1.28496	up	1.36983	0.454001	1.36983	up	-0.3894	-0.217556	0.00242901	-0.027671	0.0646015	3842	Hs.482497	gb:U72069.1 /DB_XREF=gi:1657775 /FEA=FLmRNA /CNT=141 /TID=Hs.168075.1 /TIER=FL /STK=0 /UG=Hs.168075 /LL=3842 /UG_GENE=KPNB2 /DEF=Human karyopherin beta2 mRNA, complete cds. /PROD=karyopherin beta2 /FL=gb:U72069.1 gb:U72395.1
ACTG1	212988_x_at	0.00677064	1.10367	0.142311	1.10367	up	1.15017	0.201847	1.15017	up	1.10534	0.144485	1.10534	up	1.11535	0.157495	1.11535	up	-0.133941	0.00836998	0.0679063	0.0105444	0.0235539	71	Hs.514581	gb:AL515810 /DB_XREF=gi:12779303 /DB_XREF=AL515810 /CLONE=CS0DA001YI24 (3 prime) /FEA=EST /CNT=72 /TID=Hs.14376.3 /TIER=Stack /STK=51 /UG=Hs.14376 /LL=71 /UG_GENE=ACTG1 /UG_TITLE=actin, gamma 1
	1562582_at	0.00677424	-1.11579	-0.158069	1.11579	down	-1.09556	-0.131673	1.09556	down	-1.08184	-0.113486	1.08184	down	-1.06204	-0.0868438	1.06204	down	0.100177	-0.0578926	-0.031496	-0.0133089	0.013333		Hs.737044	gb:AL390167.1 /DB_XREF=gi:9368862 /TID=Hs2.350906.1 /CNT=2 /FEA=mRNA /TIER=ConsEnd /STK=0 /UG=Hs.350906 /UG_TITLE=Homo sapiens cDNA FLJ30426 fis, clone BRACE2008917. /DEF=Homo sapiens mRNA; cDNA DKFZp547B124 (from clone DKFZp547B124).
HIPK2	224016_at	0.00679588	1.37909	0.463715	1.37909	up	1.48298	0.568495	1.48298	up	1.20153	0.264873	1.20153	up	1.22031	0.287247	1.22031	up	-0.29901	0.164705	0.269485	-0.0341369	-0.011763	28996	Hs.731417	gb:AF111850.1 /DB_XREF=gi:6560619 /FEA=FLmRNA /CNT=4 /TID=Hs.236131.2 /TIER=FL /STK=0 /UG=Hs.236131 /LL=28996 /UG_GENE=HIPK2 /DEF=Homo sapiens PRO0593 mRNA, complete cds. /PROD=PRO0593 /FL=gb:AF111850.1
QRICH1	229806_at	0.00679882	-1.0959	-0.132112	1.0959	down	-1.17312	-0.230351	1.17312	down	-1.24998	-0.321904	1.24998	down	-1.12067	-0.164367	1.12067	down	0.197017	0.0649043	-0.0333343	-0.124887	0.0326494	54870	Hs.297389	gb:AI304951 /DB_XREF=gi:3988640 /DB_XREF=qo20c04.x1 /CLONE=IMAGE:1909062 /FEA=EST /CNT=15 /TID=Hs.9956.1 /TIER=Stack /STK=14 /UG=Hs.9956 /LL=54870 /UG_GENE=FLJ20259 /UG_TITLE=hypothetical protein FLJ20259
LOC105376790	241468_at	0.00680335	1.02802	0.0398638	1.02802	up	1.09954	0.136903	1.09954	up	1.12983	0.176104	1.12983	up	1.10946	0.149854	1.10946	up	-0.0960961	-0.0562322	0.0408068	0.080008	0.0537581	105376790		gb:AA846862 /DB_XREF=gi:2933002 /DB_XREF=aj42d01.s1 /CLONE=IMAGE:1392961 /FEA=EST /CNT=7 /TID=Hs.20160.0 /TIER=ConsEnd /STK=1 /UG=Hs.20160 /UG_TITLE=ESTs
TPM3	214365_at	0.00680888	1.22636	0.29438	1.22636	up	1.30634	0.385532	1.30634	up	1.20715	0.271609	1.20715	up	1.18231	0.241609	1.18231	up	-0.19135	0.103029	0.194182	0.0802583	0.0502583	7170	Hs.644306	gb:X04201.1 /DB_XREF=gi:37429 /FEA=mRNA /CNT=22 /TID=Hs.85844.3 /TIER=Stack /STK=19 /UG=Hs.85844 /LL=4914 /UG_GENE=NTRK1 /UG_TITLE=neurotrophic tyrosine kinase, receptor, type 1 /DEF=Human skeletal muscle 1.3 kb mRNA for tropomyosin.
	217137_x_at	0.00681317	-1.08764	-0.121205	1.08764	down	1.23502	0.304536	1.23502	up	-1.01238	-0.0177438	1.01238	down	-1.28762	-0.364706	1.28762	down	0.0468321	-0.0743733	0.351368	0.0290882	-0.317874		Hs.540336	gb:K00627.1 /DB_XREF=gi:337653 /FEA=mRNA /CNT=1 /TID=Hs.203776.0 /TIER=ConsEnd /STK=0 /UG=Hs.203776 /UG_TITLE=Human kpni repeat mrna (cdna clone pcd-kpni-8), 3 end /DEF=human kpni repeat mrna (cdna clone pcd-kpni-8), 3 end.
CP	1558034_s_at	0.00682218	1.05526	0.0775937	1.05526	up	1.04659	0.0657024	1.04659	up	1.04883	0.0687863	1.04883	up	-1.04844	-0.0682404	1.04844	down	-0.0201315	0.0574622	0.0455709	0.0486548	-0.0883719	1356	Hs.558314	gb:AL556703 /DB_XREF=gi:12899623 /DB_XREF=AL556703 /CLONE=CS0DK005YI02 (5 prime) /TID=Hs2.407414.1 /CNT=16 /FEA=mRNA /TIER=ConsEnd /STK=0 /UG=Hs.407414 /UG_TITLE=Human mRNA fragment for ceruloplasmin (aa -19 to 21)
RARA	1565358_at	0.00682889	1.28114	0.357425	1.28114	up	1.94176	0.957366	1.94176	up	1.37144	0.455693	1.37144	up	1.04892	0.0688985	1.04892	up	-0.185134	0.172291	0.772233	0.270559	-0.116235	5914	Hs.654583	gb:AJ417079.1 /DB_XREF=gi:16605582 /TID=Hs2.433206.2 /CNT=1 /FEA=mRNA /TIER=ConsEnd /STK=0 /UG=Hs.433206 /UG_TITLE=Homo sapiens partial mRNA for PMLRARA fusion protein (PMLRARA gene) /DEF=Homo sapiens partial mRNA for PMLRARA fusion protein (PMLRARA gene).
COL4A3BP	223466_x_at	0.00684253	1.26869	0.343334	1.26869	up	1.51106	0.595562	1.51106	up	1.4326	0.518641	1.4326	up	1.3027	0.381506	1.3027	up	-0.43352	-0.0901856	0.162043	0.0851212	-0.0520137	10087	Hs.270437	gb:BC000102.1 /DB_XREF=gi:12652706 /FEA=FLmRNA /CNT=52 /TID=Hs.21276.1 /TIER=FL /STK=0 /UG=Hs.21276 /LL=10087 /UG_GENE=COL4A3BP /DEF=Homo sapiens, Similar to collagen, type IV, alpha 3 (Goodpasture antigen) binding protein, clone MGC:1410, mRNA, complete cds. /PROD=Similar to collagen, type IV, alpha 3(Goodpasture antigen) binding protein /FL=gb:BC000102.1 gb:AF232930.1
LRCH3	228119_at	0.0068488	-1.24774	-0.319312	1.24774	down	-1.09574	-0.131901	1.09574	down	-1.21236	-0.277814	1.21236	down	-1.30054	-0.379116	1.30054	down	0.218791	-0.100521	0.0868909	-0.0590228	-0.160324	84859	Hs.518414	gb:AI598213 /DB_XREF=gi:4607261 /DB_XREF=tn15a02.x1 /CLONE=IMAGE:2167658 /FEA=mRNA /CNT=27 /TID=Hs.22703.0 /TIER=Stack /STK=9 /UG=Hs.22703 /UG_TITLE=Homo sapiens mRNA; cDNA DKFZp434P1018 (from clone DKFZp434P1018); partial cds
	242741_x_at	0.00684977	-1.12535	-0.170376	1.12535	down	-1.01514	-0.021685	1.01514	down	-1.05509	-0.0773702	1.05509	down	-1.17825	-0.236642	1.17825	down	0.10633	-0.0640454	0.0846453	0.02896	-0.130311			gb:R16558 /DB_XREF=gi:770168 /DB_XREF=yf43e02.s1 /CLONE=IMAGE:129626 /FEA=EST /CNT=3 /TID=Hs.163424.0 /TIER=ConsEnd /STK=3 /UG=Hs.163424 /UG_TITLE=ESTs
MEIS2	207480_s_at	0.00687684	1.07536	0.104814	1.07536	up	1.06351	0.0888332	1.06351	up	1.13937	0.188238	1.13937	up	1.0608	0.0851481	1.0608	up	-0.0914895	0.0133249	-0.00265637	0.0967486	-0.00634143	4212	Hs.510989	gb:NM_020149.1 /DB_XREF=gi:9910355 /GEN=LOC56908 /FEA=FLmRNA /CNT=5 /TID=Hs.283312.0 /TIER=FL /STK=0 /UG=Hs.283312 /LL=56908 /DEF=Homo sapiens TALE homeobox protein Meis2e (LOC56908), mRNA. /PROD=TALE homeobox protein Meis2e /FL=gb:NM_020149.1 gb:AF179899.1
TIMM8A	210800_at	0.00689447	1.0237	0.0337898	1.0237	up	1.36328	0.44708	1.36328	up	1.08359	0.115821	1.08359	up	-1.06897	-0.0962221	1.06897	down	0.00586437	0.0396542	0.452944	0.121686	-0.0903577	1678		gb:BC005236.1 /DB_XREF=gi:13528875 /FEA=FLmRNA /CNT=2 /TID=Hs.125565.1 /TIER=FL /STK=0 /UG=Hs.125565 /LL=1678 /UG_GENE=TIMM8A /DEF=Homo sapiens, clone MGC:12262, mRNA, complete cds. /PROD=Unknown (protein for MGC:12262) /FL=gb:BC005236.1
	235662_at	0.00690412	-1.14284	-0.192623	1.14284	down	-1.22676	-0.29485	1.22676	down	-1.23298	-0.302152	1.23298	down	-1.33865	-0.420776	1.33865	down	0.277478	0.0848557	-0.0173714	-0.0246739	-0.143297		Hs.709600	gb:AI125867 /DB_XREF=gi:3594381 /DB_XREF=qe01g10.x1 /CLONE=IMAGE:1737762 /FEA=EST /CNT=11 /TID=Hs.20734.0 /TIER=ConsEnd /STK=1 /UG=Hs.20734 /UG_TITLE=ESTs
FILIP1	1556325_at	0.00690492	-1.01178	-0.0168921	1.01178	down	1.12888	0.174888	1.12888	up	1.0314	0.044609	1.0314	up	1.03937	0.0557057	1.03937	up	-0.0233091	-0.0402012	0.151579	0.0213	0.0323966	27145	Hs.696158	gb:AL832009.1 /DB_XREF=gi:21732549 /TID=Hs2.102796.1 /CNT=22 /FEA=mRNA /TIER=ConsEnd /STK=3 /LL=27145 /UG_GENE=KIAA1275 /UG=Hs.102796 /UG_TITLE=KIAA1275 protein /DEF=Homo sapiens mRNA; cDNA DKFZp451B134 (from clone DKFZp451B134).
RANBP9	216125_s_at	0.00694537	1.73203	0.792465	1.73203	up	1.81877	0.862962	1.81877	up	1.45165	0.537692	1.45165	up	1.39981	0.485233	1.39981	up	-0.361473	0.430992	0.501489	0.176219	0.12376	10048	Hs.708182	gb:AF064606.1 /DB_XREF=gi:3152665 /FEA=mRNA /CNT=4 /TID=Hs.306242.0 /TIER=ConsEnd /STK=0 /UG=Hs.306242 /DEF=Homo sapiens KB07 protein mRNA, partial cds. /PROD=KB07 protein
	1562289_at	0.00695598	1.36745	0.451483	1.36745	up	2.09255	1.06526	2.09255	up	1.78761	0.838035	1.78761	up	1.60332	0.681066	1.60332	up	-0.692082	-0.240598	0.373182	0.145953	-0.0110154		Hs.638554	gb:AL834519.1 /DB_XREF=gi:21740334 /TID=Hs2.376781.1 /CNT=2 /FEA=mRNA /TIER=ConsEnd /STK=0 /UG=Hs.376781 /UG_TITLE=Homo sapiens mRNA; cDNA DKFZp434N0220 (from clone DKFZp434N0220) /DEF=Homo sapiens mRNA; cDNA DKFZp434N0220 (from clone DKFZp434N0220).
CSTF3-AS1	1560202_at	0.00700362	-1.02948	-0.0419212	1.02948	down	-1.03235	-0.0459267	1.03235	down	-1.00822	-0.0118113	1.00822	down	1.0439	0.0619844	1.0439	up	0.015182	-0.0267392	-0.0307447	0.00337071	0.0771664	338739	Hs.423476	gb:BC043375.1 /DB_XREF=gi:27694225 /TID=Hs2.423476.1 /CNT=4 /FEA=mRNA /TIER=ConsEnd /STK=0 /UG=Hs.423476 /UG_TITLE=Homo sapiens, clone IMAGE:5172825, mRNA /DEF=Homo sapiens, clone IMAGE:5172825, mRNA.
	215079_at	0.0070246	1.14987	0.201472	1.14987	up	1.07574	0.105333	1.07574	up	1.07473	0.103971	1.07473	up	-1.00559	-0.00804146	1.00559	down	-0.0611096	0.140362	0.0442238	0.0428616	-0.0691511		Hs.612917	gb:AK026723.1 /DB_XREF=gi:10439641 /FEA=mRNA /CNT=6 /TID=Hs.30579.0 /TIER=ConsEnd /STK=0 /UG=Hs.30579 /UG_TITLE=Homo sapiens cDNA: FLJ23070 fis, clone LNG05629 /DEF=Homo sapiens cDNA: FLJ23070 fis, clone LNG05629.
MARS2	243529_at	0.00706272	-1.2097	-0.274646	1.2097	down	-1.25432	-0.3269	1.25432	down	-1.19959	-0.26254	1.19959	down	-1.0406	-0.0574202	1.0406	down	0.209941	-0.0647056	-0.116959	-0.0525994	0.152521	92935	Hs.744330	gb:BE542381 /DB_XREF=gi:9771026 /DB_XREF=601062841F1 /CLONE=IMAGE:3449002 /FEA=EST /CNT=12 /TID=Hs.62587.0 /TIER=ConsEnd /STK=0 /UG=Hs.62587 /UG_TITLE=ESTs, Weakly similar to SYM_HUMAN METHIONYL-TRNA SYNTHETASE (H.sapiens)
KCNG2	208550_x_at	0.00709911	-1.23265	-0.30176	1.23265	down	-1.12031	-0.163902	1.12031	down	-1.28882	-0.366045	1.28882	down	-1.25402	-0.326558	1.25402	down	0.200942	-0.100818	0.0370408	-0.165103	-0.125615	26251	Hs.247905	gb:NM_012283.1 /DB_XREF=gi:6912443 /GEN=KCNG2 /FEA=FLmRNA /CNT=2 /TID=Hs.247905.0 /TIER=FL /STK=0 /UG=Hs.247905 /LL=26251 /DEF=Homo sapiens potassium voltage-gated channel, subfamily G, member 2 (KCNG2), mRNA. /PROD=potassium voltage-gated channel, subfamily G,member 2 /FL=gb:NM_012283.1
	216229_x_at	0.00710446	-1.07776	-0.108036	1.07776	down	1.10401	0.142753	1.10401	up	-1.13414	-0.181596	1.13414	down	-1.18963	-0.250509	1.18963	down	0.101502	-0.00653405	0.244255	-0.0800939	-0.149007		Hs.720720	gb:X81001.1 /DB_XREF=gi:531407 /FEA=mRNA /CNT=2 /TID=Hs.69707.0 /TIER=ConsEnd /STK=0 /UG=Hs.69707 /LL=80867 /UG_GENE=HCGII-7 /UG_TITLE=HCGII-7 protein /DEF=H.sapiens HCG II mRNA.
FSD1L	230904_at	0.00712078	1.32847	0.409763	1.32847	up	1.3296	0.410994	1.3296	up	1.15147	0.20348	1.15147	up	1.15566	0.208711	1.15566	up	-0.1413	0.268462	0.269694	0.06218	0.0674108	83856	Hs.136901	gb:W42665 /DB_XREF=gi:1327125 /DB_XREF=zc22c09.s1 /CLONE=IMAGE:323056 /FEA=EST /CNT=10 /TID=Hs.44640.0 /TIER=Stack /STK=10 /UG=Hs.44640 /UG_TITLE=ESTs
SSFA2	236207_at	0.00712384	1.59663	0.67503	1.59663	up	1.58001	0.659935	1.58001	up	1.34502	0.42763	1.34502	up	1.6751	0.744248	1.6751	up	-0.329259	0.345771	0.330676	0.0983709	0.414989	6744	Hs.196983	gb:BE083088 /DB_XREF=gi:8473396 /DB_XREF=RC2-BT0642-030400-021-c05 /FEA=EST /CNT=14 /TID=Hs.116790.0 /TIER=ConsEnd /STK=0 /UG=Hs.116790 /UG_TITLE=ESTs, Weakly similar to KIAA0748 protein (H.sapiens)
SORCS3	215522_at	0.00713547	1.01366	0.0195734	1.01366	up	1.02817	0.040078	1.02817	up	1.1156	0.157821	1.1156	up	1.06008	0.08418	1.06008	up	-0.0568482	-0.0372748	-0.0167701	0.100973	0.0273318	22986	Hs.671950	gb:AB028982.1 /DB_XREF=gi:5689454 /GEN=KIAA1059 /FEA=mRNA /CNT=3 /TID=Hs.225976.0 /TIER=ConsEnd /STK=0 /UG=Hs.225976 /LL=22986 /DEF=Homo sapiens mRNA for KIAA1059 protein, partial cds. /PROD=KIAA1059 protein
XPC	209375_at	0.00713555	-1.29194	-0.369535	1.29194	down	-1.36676	-0.45076	1.36676	down	-1.19886	-0.261662	1.19886	down	-1.21792	-0.284416	1.21792	down	0.261939	-0.107596	-0.188822	0.000276622	-0.0224775	7508	Hs.475538	gb:D21089.1 /DB_XREF=gi:475156 /GEN=XPCC /FEA=FLmRNA /CNT=138 /TID=Hs.320.0 /TIER=FL /STK=4 /UG=Hs.320 /LL=7508 /DEF=Human mRNA for XP-C repair complementing protein (p125), complete cds. /PROD=XP-C repair complementing protein (p125) /FL=gb:D21089.1 gb:NM_004628.1
	1557637_at	0.00715814	1.18772	0.248189	1.18772	up	1.20985	0.274826	1.20985	up	1.19073	0.251849	1.19073	up	1.21798	0.284492	1.21798	up	-0.178894	0.0692952	0.095932	0.0729552	0.105598		Hs.686191	gb:BC038734.1 /DB_XREF=gi:24270833 /TID=Hs2.385775.1 /CNT=4 /FEA=mRNA /TIER=ConsEnd /STK=1 /UG=Hs.385775 /UG_TITLE=Homo sapiens, clone IMAGE:5267718, mRNA /DEF=Homo sapiens, clone IMAGE:5267718, mRNA.
B3GNT7	1555962_at	0.00717422	-1.0887	-0.122609	1.0887	down	-1.15455	-0.207328	1.15455	down	-1.1905	-0.251566	1.1905	down	-1.18553	-0.245538	1.18553	down	0.189063	0.0664534	-0.0182654	-0.0625031	-0.0564752	93010	Hs.299329	gb:CA503291 /DB_XREF=gi:24994245 /DB_XREF=UI-CF-FN0-afq-e-12-0-UI.s1 /CLONE=UI-CF-FN0-afq-e-12-0-UI /TID=Hs2.299329.2 /CNT=13 /FEA=mRNA /TIER=Stack /STK=9 /LL=93010 /UG_GENE=B3GNT7 /UG=Hs.299329 /UG_TITLE=UDP-GlcNAc:betaGal beta-1,3-N-acetylglucosaminyltransferase 7
	1568883_at	0.00726695	1.06725	0.0938986	1.06725	up	1.29018	0.367574	1.29018	up	1.08711	0.120493	1.08711	up	1.0282	0.040122	1.0282	up	-0.0546461	0.0392525	0.312928	0.0658468	-0.0145241		Hs.684385	gb:BC032649.1 /DB_XREF=gi:22749754 /TID=Hs2.382093.1 /CNT=3 /FEA=mRNA /TIER=ConsEnd /STK=1 /UG=Hs.382093 /UG_TITLE=Homo sapiens, Similar to KIAA1503 protein, clone IMAGE:5505326, mRNA /DEF=Homo sapiens, Similar to KIAA1503 protein, clone IMAGE:5505326, mRNA.
PLD1	205203_at	0.00730624	1.1165	0.15898	1.1165	up	1.46211	0.548048	1.46211	up	1.29946	0.377909	1.29946	up	1.25667	0.329604	1.25667	up	-0.275243	-0.116262	0.272805	0.102666	0.0543612	5337	Hs.382865	gb:NM_002662.1 /DB_XREF=gi:4505872 /GEN=PLD1 /FEA=FLmRNA /CNT=45 /TID=Hs.82587.0 /TIER=FL+Stack /STK=23 /UG=Hs.82587 /LL=5337 /DEF=Homo sapiens phospholipase D1, phophatidylcholine-specific (PLD1), mRNA. /PROD=phospholipase D1, phophatidylcholine-specific /FL=gb:U38545.1 gb:NM_002662.1
ZIK1	235773_at	0.00731391	-1.26167	-0.335335	1.26167	down	-1.20336	-0.267066	1.20336	down	-1.21279	-0.278325	1.21279	down	-1.20284	-0.266444	1.20284	down	0.245105	-0.0902306	-0.0219607	-0.0332198	-0.0213393	284307	Hs.454830	gb:AW029293 /DB_XREF=gi:5888049 /DB_XREF=wx08f01.x1 /CLONE=IMAGE:2543065 /FEA=EST /CNT=8 /TID=Hs.127988.0 /TIER=ConsEnd /STK=7 /UG=Hs.127988 /UG_TITLE=ESTs
STAMBP	227515_at	0.00732353	1.07082	0.0987144	1.07082	up	-1.09316	-0.128511	1.09316	down	-1.01326	-0.0190008	1.01326	down	-1.11831	-0.161326	1.11831	down	0.0459737	0.144688	-0.0825373	0.0269729	-0.115352	10617	Hs.469018	gb:AU158421 /DB_XREF=gi:11019942 /DB_XREF=AU158421 /CLONE=PLACE2000317 /FEA=mRNA /CNT=34 /TID=Hs.288029.0 /TIER=Stack /STK=9 /UG=Hs.288029 /UG_TITLE=Homo sapiens cDNA FLJ13706 fis, clone PLACE2000317
LINC00470///LINC00470	224181_at	0.00738707	1.04724	0.0665935	1.04724	up	1.09569	0.131839	1.09569	up	1.11017	0.150776	1.11017	up	1.19311	0.254731	1.19311	up	-0.0907475	-0.024154	0.0410915	0.0600282	0.163984	56651///105371954		gb:AF295728.1 /DB_XREF=gi:13160660 /FEA=FLmRNA /CNT=1 /TID=Hs.146060.0 /TIER=FL /STK=0 /UG=Hs.146060 /DEF=Homo sapiens putative C18orf2 variant 2 mRNA, complete cds, alternatively spliced. /PROD=putative C18orf2 variant 2 /FL=gb:AF295728.1
TBC1D8	221592_at	0.00740977	1.06953	0.0969719	1.06953	up	1.21059	0.27571	1.21059	up	1.20211	0.265574	1.20211	up	1.26773	0.342249	1.26773	up	-0.182256	-0.085284	0.0934539	0.0833185	0.159993	11138		gb:BC001663.1 /DB_XREF=gi:12804504 /FEA=FLmRNA /CNT=43 /TID=Hs.164170.1 /TIER=ConsEnd /STK=0 /UG=Hs.164170 /LL=11138 /UG_GENE=VRP /DEF=Homo sapiens, Similar to ribosomal protein L31, clone MGC:1641, mRNA, complete cds. /PROD=Similar to ribosomal protein L31 /FL=gb:BC001663.1
COG6	232786_at	0.00740983	1.03938	0.0557165	1.03938	up	1.07101	0.0989674	1.07101	up	1.06148	0.086078	1.06148	up	1.09768	0.134455	1.09768	up	-0.065644	-0.00992751	0.0333234	0.020434	0.0688112	57511	Hs.507805	gb:AB032960.1 /DB_XREF=gi:6382011 /GEN=KIAA1134 /FEA=mRNA /CNT=5 /TID=Hs.18282.1 /TIER=ConsEnd /STK=0 /UG=Hs.18282 /LL=57511 /DEF=Homo sapiens mRNA for KIAA1134 protein, partial cds. /PROD=KIAA1134 protein
PEX3	203969_at	0.00742233	-1.16311	-0.217984	1.16311	down	-1.1696	-0.226013	1.1696	down	-1.2437	-0.31464	1.2437	down	-1.20307	-0.266717	1.20307	down	0.189539	-0.0284452	-0.0364741	-0.1251	-0.0771774	8504	Hs.592832	gb:AU157140 /DB_XREF=gi:11018661 /DB_XREF=AU157140 /CLONE=PLACE1006288 /FEA=FLmRNA /CNT=82 /TID=Hs.7277.0 /TIER=ConsEnd /STK=1 /UG=Hs.7277 /LL=8504 /UG_GENE=PEX3 /UG_TITLE=peroxisomal biogenesis factor 3 /FL=gb:AB035307.1 gb:NM_003630.1
VIPAS39	233140_s_at	0.00744518	1.23762	0.307573	1.23762	up	1.28151	0.35784	1.28151	up	1.17069	0.227356	1.17069	up	1.28479	0.361537	1.28479	up	-0.228619	0.0789539	0.129221	-0.00126269	0.132918	63894	Hs.16157	gb:AF111168 /DB_XREF=gi:5468517 /FEA=DNA_5 /CNT=3 /TID=Hs.16157.1 /TIER=ConsEnd /STK=0 /UG=Hs.16157 /LL=63894 /UG_GENE=FLJ12707 /UG_TITLE=hypothetical protein FLJ12707 /DEF=Homo sapiens serine palmitoyl transferase, subunit II gene, complete cds; and unknown genes
LOC339593	1564049_at	0.00745402	1.02789	0.0396913	1.02789	up	1.10555	0.144765	1.10555	up	1.14255	0.192257	1.14255	up	1.07625	0.106012	1.07625	up	-0.0609801	-0.0212888	0.083785	0.131277	0.045032	339593	Hs.434320	gb:BC043370.1 /DB_XREF=gi:27694174 /TID=Hs2.438431.1 /CNT=1 /FEA=mRNA /TIER=ConsEnd /STK=0 /UG=Hs.438431 /UG_TITLE=Homo sapiens, clone IMAGE:5166493, mRNA /DEF=Homo sapiens, clone IMAGE:5166493, mRNA.
SEPT7P2	1569974_x_at	0.00750334	-1.12481	-0.169679	1.12481	down	-1.13967	-0.18862	1.13967	down	-1.16986	-0.226338	1.16986	down	-1.21497	-0.28092	1.21497	down	0.17302	0.00334099	-0.0156006	-0.0533187	-0.1079	641977	Hs.723477	gb:BC015774.1 /DB_XREF=gi:16041784 /TID=Hs2.122817.1 /CNT=3 /FEA=mRNA /TIER=ConsEnd /STK=0 /UG=Hs.122817 /UG_TITLE=Homo sapiens, clone IMAGE:4849828, mRNA /DEF=Homo sapiens, clone IMAGE:4849828, mRNA.
POU6F2-AS2	233772_at	0.00750576	1.00065	0.000930728	1.00065	up	1.02098	0.0299595	1.02098	up	-1.02463	-0.035102	1.02463	down	1.08849	0.122322	1.08849	up	-0.00153501	-0.000604285	0.0284245	-0.036637	0.120787	100689074	Hs.675876	gb:AK023033.1 /DB_XREF=gi:10434761 /FEA=mRNA /CNT=3 /TID=Hs.296729.0 /TIER=ConsEnd /STK=1 /UG=Hs.296729 /UG_TITLE=Homo sapiens cDNA FLJ12971 fis, clone NT2RP2005882 /DEF=Homo sapiens cDNA FLJ12971 fis, clone NT2RP2005882.
	241632_x_at	0.00751745	1.03547	0.0502812	1.03547	up	1.17463	0.232206	1.17463	up	1.05304	0.0745598	1.05304	up	-1.05399	-0.0758663	1.05399	down	-0.0490122	0.00126897	0.183194	0.0255476	-0.124878		Hs.666891	gb:AI335223 /DB_XREF=gi:4072150 /DB_XREF=ta93c02.x1 /CLONE=IMAGE:2051618 /FEA=EST /CNT=8 /TID=Hs.133293.0 /TIER=ConsEnd /STK=0 /UG=Hs.133293 /UG_TITLE=ESTs
TMEM165	226825_s_at	0.00753688	1.12094	0.164705	1.12094	up	1.28754	0.364623	1.28754	up	1.24843	0.320112	1.24843	up	1.27159	0.34663	1.27159	up	-0.288211	-0.123506	0.0764114	0.031901	0.0584189	55858	Hs.479766	gb:AW665624 /DB_XREF=gi:7458093 /DB_XREF=hi91e01.x1 /CLONE=IMAGE:2979672 /FEA=EST /CNT=69 /TID=Hs.236510.1 /TIER=ConsEnd /STK=0 /UG=Hs.236510 /LL=55858 /UG_GENE=LOC55858 /UG_TITLE=uncharacterized hypothalamus protein HTMP
EPHA1	205977_s_at	0.00755278	-1.05984	-0.0838504	1.05984	down	-1.04287	-0.0605609	1.04287	down	1.02445	0.0348508	1.02445	up	1.22999	0.298642	1.22999	up	-0.011187	-0.0950375	-0.0717479	0.0236637	0.287455	2041	Hs.89839	gb:NM_005232.1 /DB_XREF=gi:4885208 /GEN=EPHA1 /FEA=FLmRNA /CNT=38 /TID=Hs.89839.0 /TIER=FL+Stack /STK=22 /UG=Hs.89839 /LL=2041 /DEF=Homo sapiens EphA1 (EPHA1), mRNA. /PROD=EphA1 /FL=gb:M18391.1 gb:NM_005232.1
FOXP2	243278_at	0.00755872	1.07895	0.109623	1.07895	up	1.05124	0.0720958	1.05124	up	1.0788	0.109428	1.0788	up	1.11334	0.154895	1.11334	up	-0.0561796	0.0534437	0.0159161	0.0532483	0.0987154	93986	Hs.282787	gb:AW291402 /DB_XREF=gi:6698122 /DB_XREF=UI-H-BI2-aga-d-12-0-UI.s1 /CLONE=IMAGE:2723758 /FEA=EST /CNT=3 /TID=Hs.149057.0 /TIER=ConsEnd /STK=3 /UG=Hs.149057 /UG_TITLE=ESTs
	213747_at	0.00757032	1.28326	0.359809	1.28326	up	1.64211	0.715552	1.64211	up	1.20726	0.271742	1.20726	up	1.28425	0.360928	1.28425	up	-0.283558	0.0762509	0.431994	-0.0118162	0.0773703			gb:AA047234 /DB_XREF=gi:1525134 /DB_XREF=zf50b09.s1 /CLONE=IMAGE:380345 /FEA=EST /CNT=45 /TID=Hs.223014.1 /TIER=Stack /STK=9 /UG=Hs.223014 /LL=51582 /UG_GENE=LOC51582 /UG_TITLE=antizyme inhibitor
	243895_x_at	0.00760028	1.01768	0.0252801	1.01768	up	1.16668	0.222409	1.16668	up	1.07978	0.110741	1.07978	up	1.01947	0.0278133	1.01947	up	-0.0809614	-0.0556812	0.141448	0.0297795	-0.053148			gb:AW452435 /DB_XREF=gi:6993211 /DB_XREF=UI-H-BI3-als-b-11-0-UI.s1 /CLONE=IMAGE:3068492 /FEA=EST /CNT=3 /TID=Hs.196969.0 /TIER=ConsEnd /STK=3 /UG=Hs.196969 /UG_TITLE=ESTs, Weakly similar to ALU1_HUMAN ALU SUBFAMILY J SEQUENCE CONTAMINATION WARNING ENTRY (H.sapiens)
SVIL-AS1	228786_at	0.00760104	1.14619	0.196845	1.14619	up	1.1298	0.176071	1.1298	up	1.05494	0.0771596	1.05494	up	1.28635	0.363281	1.28635	up	-0.0841751	0.11267	0.0918959	-0.0070154	0.279106	102724316	Hs.660899	gb:AA909523 /DB_XREF=gi:3048928 /DB_XREF=ol16f08.s1 /CLONE=IMAGE:1523655 /FEA=EST /CNT=19 /TID=Hs.55962.0 /TIER=Stack /STK=8 /UG=Hs.55962 /UG_TITLE=ESTs
ATM	1553387_at	0.00762305	-1.14657	-0.19733	1.14657	down	-1.09004	-0.124385	1.09004	down	-1.12034	-0.163934	1.12034	down	-1.26632	-0.340645	1.26632	down	0.137567	-0.0597628	0.0131823	-0.0263662	-0.203078	472		gb:NM_138293.1 /DB_XREF=gi:20336200 /GEN=ATM /TID=Hs2.194382.3 /CNT=3 /FEA=FLmRNA /TIER=FL /STK=1 /LL=472 /UG=Hs.194382 /DEF=Homo sapiens ataxia telangiectasia mutated (includes complementation groups A, C and D) (ATM), transcript variant 3, mRNA. /PROD=ataxia telangiectasia mutated protein isoform 3 /FL=gb:NM_138293.1
PTPRB	1560105_at	0.00763073	1.04112	0.0581407	1.04112	up	1.13424	0.181723	1.13424	up	1.00512	0.00737122	1.00512	up	1.04158	0.058775	1.04158	up	-0.038276	0.0198647	0.143447	-0.0309048	0.020499	5787	Hs.434375	gb:BC043182.1 /DB_XREF=gi:27693245 /TID=Hs2.438488.1 /CNT=4 /FEA=mRNA /TIER=ConsEnd /STK=0 /UG=Hs.438488 /UG_TITLE=Homo sapiens, clone IMAGE:5287924, mRNA /DEF=Homo sapiens, clone IMAGE:5287924, mRNA.
NXPE3	243011_at	0.00764655	1.43021	0.51623	1.43021	up	1.40934	0.495024	1.40934	up	1.27377	0.34911	1.27377	up	1.36401	0.447849	1.36401	up	-0.397543	0.118687	0.0974812	-0.0484331	0.0503063	91775	Hs.595933	gb:BF317081 /DB_XREF=gi:11265486 /DB_XREF=601903480F1 /CLONE=IMAGE:4136298 /FEA=EST /CNT=5 /TID=Hs.258208.0 /TIER=ConsEnd /STK=0 /UG=Hs.258208 /UG_TITLE=ESTs
USP36	227093_at	0.00766018	-1.25529	-0.328016	1.25529	down	-1.55211	-0.634234	1.55211	down	-1.46699	-0.552858	1.46699	down	-1.37851	-0.463111	1.37851	down	0.421366	0.09335	-0.212867	-0.131491	-0.0417449	57602	Hs.464243	gb:AU152298 /DB_XREF=gi:11013819 /DB_XREF=AU152298 /CLONE=NT2RP3000622 /FEA=mRNA /CNT=39 /TID=Hs.11387.1 /TIER=Stack /STK=21 /UG=Hs.11387 /LL=57602 /UG_GENE=KIAA1453 /UG_TITLE=KIAA1453 protein
FLJ37201	1560654_at	0.00766181	1.05171	0.072738	1.05171	up	1.12859	0.174524	1.12859	up	1.08693	0.120257	1.08693	up	1.08279	0.114749	1.08279	up	-0.0720316	0.000706408	0.102492	0.0482255	0.0427174	283011	Hs.679445	gb:AK094520.1 /DB_XREF=gi:21753599 /TID=Hs2.376351.1 /CNT=4 /FEA=mRNA /TIER=ConsEnd /STK=0 /UG=Hs.376351 /UG_TITLE=Homo sapiens, clone IMAGE:5295299, mRNA /DEF=Homo sapiens cDNA FLJ37201 fis, clone BRALZ2006560.
ALKBH1	236721_at	0.00767288	-1.02077	-0.0296555	1.02077	down	1.04929	0.0694076	1.04929	up	-1.03909	-0.0553148	1.03909	down	1.1673	0.223175	1.1673	up	0.000171661	-0.0294839	0.0695792	-0.0551432	0.223346	8846	Hs.94542	gb:AI922200 /DB_XREF=gi:5658164 /DB_XREF=wn89d12.x1 /CLONE=IMAGE:2453015 /FEA=EST /CNT=9 /TID=Hs.94542.0 /TIER=ConsEnd /STK=5 /UG=Hs.94542 /UG_TITLE=ESTs
NT5E	1553994_at	0.00773111	-1.23129	-0.300176	1.23129	down	-1.27837	-0.35431	1.27837	down	-1.30621	-0.38539	1.30621	down	-1.22357	-0.291098	1.22357	down	0.335396	0.0352194	-0.0189147	-0.0499942	0.0442977	4907	Hs.153952	gb:BC015940.1 /DB_XREF=gi:16198517 /TID=Hs2.153952.2 /CNT=10 /FEA=FLmRNA /TIER=FL+Stack /STK=9 /LL=4907 /UG_GENE=NT5E /UG=Hs.153952 /DEF=Homo sapiens, Similar to 5 nucleotidase (CD73), clone MGC:9259 IMAGE:3920680, mRNA, complete cds. /PROD=Similar to 5 nucleotidase (CD73) /FL=gb:BC015940.1
SPATA18	229331_at	0.00775915	1.0116	0.0166409	1.0116	up	1.00015	0.000214826	1.00015	up	1.08211	0.113845	1.08211	up	1.07094	0.0988776	1.07094	up	-0.0298825	-0.0132416	-0.0296677	0.0839629	0.0689951	132671	Hs.527090	gb:AI559300 /DB_XREF=gi:4509505 /DB_XREF=tq43d03.x1 /CLONE=IMAGE:2211557 /FEA=EST /CNT=16 /TID=Hs.294140.0 /TIER=Stack /STK=13 /UG=Hs.294140 /UG_TITLE=ESTs
	231735_s_at	0.00777527	-1.12388	-0.168491	1.12388	down	-1.159	-0.212875	1.159	down	-1.32358	-0.404447	1.32358	down	-1.3878	-0.472802	1.3878	down	0.283863	0.115372	0.070988	-0.120584	-0.188939			gb:NM_014086.1 /DB_XREF=gi:7662589 /GEN=PRO1073 /FEA=FLmRNA /CNT=7 /TID=Hs.6975.5 /TIER=FL /STK=1 /UG=Hs.6975 /LL=29005 /DEF=Homo sapiens PRO1073 protein (PRO1073), mRNA. /PROD=PRO1073 protein /FL=gb:NM_014086.1
UGGT2	1558467_a_at	0.0077923	1.0012	0.00173556	1.0012	up	1.15759	0.211126	1.15759	up	1.12643	0.171756	1.12643	up	-1.01701	-0.024335	1.01701	down	-0.0694655	-0.0677299	0.14166	0.10229	-0.0938005	55757	Hs.656444	gb:BE156619 /DB_XREF=gi:8619340 /DB_XREF=QV0-HT0368-150200-113-c05 /TID=Hs2.221635.1 /CNT=9 /FEA=mRNA /TIER=ConsEnd /STK=0 /UG=Hs.221635 /UG_TITLE=Homo sapiens clone IMAGE:125405, mRNA sequence
SPOCK2	202524_s_at	0.00780127	-1.54169	-0.62451	1.54169	down	-1.9609	-0.971516	1.9609	down	-1.57499	-0.655347	1.57499	down	-1.64772	-0.720474	1.64772	down	0.531346	-0.0931634	-0.440169	-0.124001	-0.189127	9806	Hs.523009	gb:NM_014767.1 /DB_XREF=gi:7662035 /GEN=KIAA0275 /FEA=FLmRNA /CNT=186 /TID=Hs.74583.0 /TIER=FL+Stack /STK=55 /UG=Hs.74583 /LL=9806 /DEF=Homo sapiens KIAA0275 gene product (KIAA0275), mRNA. /PROD=KIAA0275 gene product /FL=gb:NM_014767.1 gb:D87465.1
	231597_x_at	0.00781866	-1.06771	-0.094518	1.06771	down	1.94606	0.960557	1.94606	up	1.14111	0.190442	1.14111	up	-1.38471	-0.469588	1.38471	down	0.230096	0.135578	1.19065	0.420537	-0.239493		Hs.720692	gb:AI371550 /DB_XREF=gi:4150303 /DB_XREF=ta51a07.x2 /CLONE=IMAGE:2047572 /FEA=EST /CNT=18 /TID=Hs.154173.0 /TIER=Stack /STK=17 /UG=Hs.154173 /UG_TITLE=ESTs
EIF3B	236274_at	0.00783763	-1.28486	-0.361608	1.28486	down	-1.25996	-0.333379	1.25996	down	-1.27816	-0.354068	1.27816	down	-1.25115	-0.323257	1.25115	down	0.247966	-0.113642	-0.0854134	-0.106102	-0.0752914	8662	Hs.371001	gb:AW129967 /DB_XREF=gi:6131572 /DB_XREF=xf26b06.x1 /CLONE=IMAGE:2619155 /FEA=EST /CNT=7 /TID=Hs.186610.0 /TIER=ConsEnd /STK=7 /UG=Hs.186610 /UG_TITLE=ESTs
C4orf33	1552372_at	0.00784267	1.00473	0.00680262	1.00473	up	1.02801	0.0398505	1.02801	up	1.08807	0.121769	1.08807	up	1.0455	0.0641918	1.0455	up	-0.038938	-0.0321354	0.000912521	0.0828307	0.0252538	132321	Hs.567679	gb:BC016358.1 /DB_XREF=gi:18921427 /TID=Hs2.128777.1 /CNT=35 /FEA=FLmRNA /TIER=ConsEnd /STK=0 /LL=132321 /UG_GENE=LOC132321 /UG=Hs.128777 /UG_TITLE=hypothetical protein LOC132321 /DEF=Homo sapiens, clone IMAGE:4095238, mRNA. /FL=gb:BC032582.1 gb:NM_173487.1
COPS8	236204_at	0.00787996	-1.09607	-0.132337	1.09607	down	-1.0748	-0.104071	1.0748	down	-1.13198	-0.178849	1.13198	down	-1.13052	-0.176983	1.13052	down	0.117681	-0.0146555	0.0136104	-0.061168	-0.0593014	10920		gb:AI193769 /DB_XREF=gi:3744978 /DB_XREF=qe79g03.x1 /CLONE=IMAGE:1745236 /FEA=EST /CNT=6 /TID=Hs.34898.0 /TIER=ConsEnd /STK=6 /UG=Hs.34898 /UG_TITLE=ESTs
BCL9L	228065_at	0.00789867	-1.38322	-0.468032	1.38322	down	-1.50456	-0.589339	1.50456	down	-1.27799	-0.35388	1.27799	down	-1.19501	-0.257021	1.19501	down	0.284289	-0.183743	-0.305049	-0.0695905	0.0272686	283149	Hs.414740	gb:AL353962 /DB_XREF=gi:7676974 /DB_XREF=DKFZp761M218_s1 /CLONE=DKFZp761M218 /FEA=EST /CNT=25 /TID=Hs.113916.1 /TIER=Stack /STK=15 /UG=Hs.113916 /LL=643 /UG_GENE=BLR1 /UG_TITLE=Burkitt lymphoma receptor 1, GTP-binding protein
	241750_x_at	0.00790191	1.05915	0.0829026	1.05915	up	1.1044	0.143263	1.1044	up	1.11439	0.156256	1.11439	up	1.14527	0.195687	1.14527	up	-0.0890361	-0.00613356	0.0542267	0.0672195	0.106651			gb:N65982 /DB_XREF=gi:1218107 /DB_XREF=za27h02.s1 /CLONE=IMAGE:293811 /FEA=EST /CNT=3 /TID=Hs.109434.0 /TIER=ConsEnd /STK=3 /UG=Hs.109434 /UG_TITLE=ESTs
	215132_at	0.00790574	1.04121	0.0582612	1.04121	up	1.05455	0.0766261	1.05455	up	1.15295	0.205324	1.15295	up	1.07862	0.109188	1.07862	up	-0.0885141	-0.0302529	-0.011888	0.11681	0.0206739		Hs.244772	gb:AL137474.1 /DB_XREF=gi:6808085 /FEA=mRNA /CNT=6 /TID=Hs.244772.0 /TIER=ConsEnd /STK=0 /UG=Hs.244772 /UG_TITLE=Homo sapiens mRNA; cDNA DKFZp434E2423 (from clone DKFZp434E2423) /DEF=Homo sapiens mRNA; cDNA DKFZp434E2423 (from clone DKFZp434E2423).
CDK10	203469_s_at	0.00792314	-1.30393	-0.382863	1.30393	down	-1.29837	-0.376698	1.29837	down	-1.26266	-0.336463	1.26266	down	-1.14517	-0.19556	1.14517	down	0.26947	-0.113393	-0.107228	-0.0669929	0.0739099	8558	Hs.699177	gb:NM_003674.1 /DB_XREF=gi:4502730 /GEN=CDK10 /FEA=FLmRNA /CNT=92 /TID=Hs.77313.0 /TIER=FL+Stack /STK=54 /UG=Hs.77313 /LL=8558 /DEF=Homo sapiens cyclin-dependent kinase (CDC2-like) 10 (CDK10), mRNA. /PROD=cyclin-dependent kinase (CDC2-like) 10 /FL=gb:NM_003674.1
THRAP3	222440_s_at	0.00793302	-1.13574	-0.183633	1.13574	down	-1.12914	-0.175229	1.12914	down	-1.08693	-0.120263	1.08693	down	-1.22337	-0.290862	1.22337	down	0.174994	-0.00863891	-0.000235134	0.0547311	-0.115868	9967	Hs.744057	gb:AL576205 /DB_XREF=gi:12938118 /DB_XREF=AL576205 /CLONE=CS0DI074YA21 (3 prime) /FEA=FLmRNA /CNT=182 /TID=Hs.108319.0 /TIER=Stack /STK=57 /UG=Hs.108319 /LL=9967 /UG_GENE=TRAP150 /UG_TITLE=thyroid hormone receptor-associated protein, 150 kDa subunit /FL=gb:NM_005119.1 gb:AF117756.1
RQCD1	213903_s_at	0.00795104	1.04831	0.0680615	1.04831	up	1.15555	0.208583	1.15555	up	1.13039	0.176817	1.13039	up	1.14926	0.200711	1.14926	up	-0.120707	-0.0526458	0.0878757	0.0561095	0.0800038	9125	Hs.148767	gb:AI380850 /DB_XREF=gi:4190703 /DB_XREF=tg17a02.x1 /CLONE=IMAGE:2109002 /FEA=EST /CNT=28 /TID=Hs.94211.1 /TIER=Stack /STK=12 /UG=Hs.94211 /LL=9125 /UG_GENE=RQCD1 /UG_TITLE=rcd1 (required for cell differentiation, S.pombe) homolog 1
ABCF2	207623_at	0.00795766	-1.22065	-0.287644	1.22065	down	-1.34906	-0.431955	1.34906	down	-1.31072	-0.390361	1.31072	down	-1.35536	-0.438678	1.35536	down	0.34141	0.053766	-0.0905447	-0.0489513	-0.0972685	10061	Hs.654958	gb:NM_005692.2 /DB_XREF=gi:10947136 /GEN=ABCF2 /FEA=FLmRNA /CNT=3 /TID=Hs.153612.0 /TIER=FL /STK=0 /UG=Hs.153612 /LL=10061 /DEF=Homo sapiens ATP-binding cassette, sub-family F (GCN20), member 2 (ABCF2), mRNA. /PROD=ATP-binding cassette, sub-family F, member 2 /FL=gb:AL050291.1 gb:NM_005692.2
DCP2	238779_at	0.00796141	1.47586	0.561555	1.47586	up	1.43432	0.520365	1.43432	up	1.39232	0.477496	1.39232	up	1.87898	0.909948	1.87898	up	-0.287745	0.27381	0.232621	0.189751	0.622204	167227	Hs.443875	gb:BE896137 /DB_XREF=gi:10360057 /DB_XREF=601438728F1 /CLONE=IMAGE:3923743 /FEA=EST /CNT=12 /TID=Hs.89034.0 /TIER=ConsEnd /STK=0 /UG=Hs.89034 /UG_TITLE=ESTs
	1561653_at	0.00796246	-1.03902	-0.0552167	1.03902	down	-1.03509	-0.0497597	1.03509	down	-1.07531	-0.104756	1.07531	down	-1.07018	-0.0978534	1.07018	down	0.0687862	0.0135695	0.0190266	-0.0359703	-0.0290671		Hs.621484	gb:AF085993.1 /DB_XREF=gi:3483338 /TID=Hs2.384637.1 /CNT=2 /FEA=mRNA /TIER=ConsEnd /STK=1 /UG=Hs.384637 /UG_TITLE=Homo sapiens full length insert cDNA clone YU21F10 /DEF=Homo sapiens full length insert cDNA clone YU21F10.
BAD	1861_at	0.00799651	1.25939	0.332721	1.25939	up	1.30112	0.379753	1.30112	up	1.35083	0.43385	1.35083	up	1.32853	0.409832	1.32853	up	-0.319959	0.0127621	0.0597948	0.113891	0.0898736	572	Hs.370254	U66879 /FEATURE= /DEFINITION=HSU66879 Human Bcl-2 binding component 6 (bbc6) mRNA, complete cds
CENPBD1P1///LOC101928072///LOC101930129///LOC105371949///RPL23AP7///RPL23AP79///RPL23AP82	232899_at	0.00804198	1.08597	0.118987	1.08597	up	1.358	0.441481	1.358	up	1.27842	0.35436	1.27842	up	-1.05481	-0.0769882	1.05481	down	-0.194529	-0.0755418	0.246952	0.159831	-0.271517	65996///118433///284942///100271626///101928072///101930129///105371949	Hs.406135///Hs.595056	gb:R17536 /DB_XREF=gi:771146 /DB_XREF=yg03f09.r1 /CLONE=IMAGE:30980 /FEA=mRNA /CNT=4 /TID=Hs.284231.0 /TIER=ConsEnd /STK=0 /UG=Hs.284231 /UG_TITLE=Novel human gene mapping to chomosome 22
	1559895_x_at	0.00805654	1.02731	0.0388677	1.02731	up	1.02668	0.0379921	1.02668	up	1.10705	0.146717	1.10705	up	1.09613	0.132417	1.09613	up	-0.0625206	-0.0236529	-0.0245286	0.084196	0.069896			gb:AK026561.1 /DB_XREF=gi:10439443 /TID=Hs2.419942.1 /CNT=4 /FEA=mRNA /TIER=ConsEnd /STK=0 /UG=Hs.419942 /UG_TITLE=Homo sapiens cDNA: FLJ22908 fis, clone KAT05690. /DEF=Homo sapiens cDNA: FLJ22908 fis, clone KAT05690.
ZNF331	227613_at	0.00809979	-1.27043	-0.345316	1.27043	down	-1.36285	-0.446622	1.36285	down	-1.47498	-0.560694	1.47498	down	-1.26044	-0.333927	1.26044	down	0.362655	0.0173394	-0.0839668	-0.198039	0.0287289	55422	Hs.185674	gb:AW450874 /DB_XREF=gi:6991650 /DB_XREF=UI-H-BI3-all-a-11-0-UI.s1 /CLONE=IMAGE:2737053 /FEA=EST /CNT=31 /TID=Hs.199014.0 /TIER=Stack /STK=10 /UG=Hs.199014 /UG_TITLE=ESTs, Moderately similar to ALU7_HUMAN ALU SUBFAMILY SQ SEQUENCE CONTAMINATION WARNING ENTRY (H.sapiens)
NBR2	1553992_s_at	0.00811142	1.06077	0.0851154	1.06077	up	-1.00561	-0.0080638	1.00561	down	1.13879	0.187504	1.13879	up	1.25415	0.326712	1.25415	up	-0.0722431	0.0128723	-0.0803069	0.11526	0.254469	10230	Hs.373818	gb:BC034248.1 /DB_XREF=gi:21707720 /TID=Hs2.375149.1 /CNT=17 /FEA=FLmRNA /TIER=FL+Stack /STK=9 /UG=Hs.375149 /DEF=Homo sapiens, Similar to NBR2, clone MGC:17062 IMAGE:4339497, mRNA, complete cds. /PROD=Similar to NBR2 /FL=gb:BC034248.1
MAP4K1	214339_s_at	0.00812297	-1.34601	-0.428692	1.34601	down	-1.72406	-0.78581	1.72406	down	-1.5285	-0.612114	1.5285	down	-1.34741	-0.430184	1.34741	down	0.456796	0.0281048	-0.329014	-0.155317	0.0266119	11184	Hs.95424	gb:AA744529 /DB_XREF=gi:2783293 /DB_XREF=ny79a04.s1 /CLONE=IMAGE:1284462 /FEA=EST /CNT=10 /TID=Hs.86575.2 /TIER=Stack /STK=10 /UG=Hs.86575 /LL=11184 /UG_GENE=MAP4K1 /UG_TITLE=mitogen-activated protein kinase kinase kinase kinase 1
C12orf56	236840_at	0.0081416	-1.03568	-0.0505787	1.03568	down	1.05685	0.0797668	1.05685	up	1.08314	0.115215	1.08314	up	1.09648	0.132876	1.09648	up	-0.0509559	-0.101535	0.0288109	0.0642595	0.0819198	115749	Hs.535190	gb:AI522132 /DB_XREF=gi:4436267 /DB_XREF=ti78e11.x1 /CLONE=IMAGE:2138156 /FEA=EST /CNT=5 /TID=Hs.28700.0 /TIER=ConsEnd /STK=5 /UG=Hs.28700 /UG_TITLE=ESTs
	241330_x_at	0.00814212	1.06183	0.0865502	1.06183	up	1.0933	0.128688	1.0933	up	1.09244	0.12756	1.09244	up	-1.00859	-0.0123331	1.00859	down	-0.0724682	0.014082	0.0562197	0.0550913	-0.0848013			gb:AI424301 /DB_XREF=gi:4270232 /DB_XREF=te90a04.x1 /CLONE=IMAGE:2093934 /FEA=EST /CNT=4 /TID=Hs.231933.0 /TIER=ConsEnd /STK=4 /UG=Hs.231933 /UG_TITLE=ESTs
	242437_at	0.00815745	-1.16813	-0.224204	1.16813	down	-1.22082	-0.287847	1.22082	down	-1.12553	-0.170599	1.12553	down	-1.18791	-0.248423	1.18791	down	0.201891	-0.0223137	-0.085956	0.0312915	-0.0465323		Hs.668061	gb:AA810258 /DB_XREF=gi:2879617 /DB_XREF=od14e06.s1 /CLONE=IMAGE:1367938 /FEA=EST /CNT=3 /TID=Hs.123126.0 /TIER=ConsEnd /STK=3 /UG=Hs.123126 /UG_TITLE=ESTs
BMP2K	232688_at	0.00817072	1.02192	0.0312809	1.02192	up	1.14891	0.200271	1.14891	up	1.25399	0.326531	1.25399	up	1.05042	0.0709732	1.05042	up	-0.0851571	-0.0538761	0.115114	0.241374	-0.0141839	55589		gb:AU144829 /DB_XREF=gi:11006350 /DB_XREF=AU144829 /CLONE=HEMBA1003086 /FEA=mRNA /CNT=6 /TID=Hs.129331.0 /TIER=ConsEnd /STK=1 /UG=Hs.129331 /UG_TITLE=Homo sapiens cDNA FLJ11558 fis, clone HEMBA1003086
MAP3K14	205192_at	0.00818313	-1.47086	-0.556659	1.47086	down	-1.49362	-0.57881	1.49362	down	-1.3524	-0.435519	1.3524	down	-1.50562	-0.590359	1.50562	down	0.458002	-0.0986565	-0.120808	0.0224829	-0.132357	9020	Hs.404183	gb:NM_003954.1 /DB_XREF=gi:4505396 /GEN=MAP3K14 /FEA=FLmRNA /CNT=38 /TID=Hs.47007.0 /TIER=FL+Stack /STK=17 /UG=Hs.47007 /LL=9020 /DEF=Homo sapiens mitogen-activated protein kinase kinase kinase 14 (MAP3K14), mRNA. /PROD=mitogen-activated protein kinase kinase kinase14 /FL=gb:NM_003954.1
	234768_at	0.00818972	1.02871	0.0408347	1.02871	up	1.19335	0.25502	1.19335	up	1.10504	0.144102	1.10504	up	1.08754	0.121064	1.08754	up	-0.0778867	-0.037052	0.177133	0.0662157	0.043177		Hs.677269	gb:AK024518.1 /DB_XREF=gi:10436819 /FEA=mRNA /CNT=1 /TID=Hs.306681.0 /TIER=ConsEnd /STK=0 /UG=Hs.306681 /UG_TITLE=Homo sapiens cDNA: FLJ20865 fis, clone ADKA01850 /DEF=Homo sapiens cDNA: FLJ20865 fis, clone ADKA01850.
SYNJ1	207594_s_at	0.00819688	1.5073	0.591969	1.5073	up	1.81262	0.858078	1.81262	up	1.44369	0.529763	1.44369	up	1.37612	0.46061	1.37612	up	-0.573917	0.0180525	0.284161	-0.0441534	-0.113307	8867	Hs.473632	gb:NM_003895.1 /DB_XREF=gi:4507334 /GEN=SYNJ1 /FEA=FLmRNA /CNT=3 /TID=Hs.127416.0 /TIER=FL /STK=0 /UG=Hs.127416 /LL=8867 /DEF=Homo sapiens synaptojanin 1 (SYNJ1), mRNA. /PROD=synaptojanin 1 /FL=gb:NM_003895.1 gb:AF009040.1
	242933_at	0.0082195	1.1532	0.205643	1.1532	up	1.16741	0.223313	1.16741	up	1.26762	0.342117	1.26762	up	1.24283	0.31363	1.24283	up	-0.221423	-0.0157807	0.00188947	0.120694	0.0922067		Hs.666640	gb:AI016631 /DB_XREF=gi:3230967 /DB_XREF=ov30f09.x1 /CLONE=IMAGE:1638857 /FEA=EST /CNT=3 /TID=Hs.144078.0 /TIER=ConsEnd /STK=3 /UG=Hs.144078 /UG_TITLE=ESTs
MSRB2	218773_s_at	0.00823871	1.54805	0.630451	1.54805	up	1.59602	0.67448	1.59602	up	1.41232	0.49807	1.41232	up	1.41774	0.503596	1.41774	up	-0.507855	0.122595	0.166625	-0.0097847	-0.0042593	22921	Hs.461420	gb:NM_012228.1 /DB_XREF=gi:6912591 /GEN=PILB /FEA=FLmRNA /CNT=75 /TID=Hs.279754.0 /TIER=FL+Stack /STK=51 /UG=Hs.279754 /LL=22921 /DEF=Homo sapiens pilin-like transcription factor (PILB), mRNA. /PROD=pilin-like transcription factor /FL=gb:AF122004.1 gb:NM_012228.1
	217571_at	0.00825797	1.01359	0.0194685	1.01359	up	1.11909	0.162327	1.11909	up	1.08681	0.120096	1.08681	up	1.11674	0.159289	1.11674	up	-0.0785693	-0.0591009	0.083758	0.0415263	0.0807197			gb:AV661138 /DB_XREF=gi:9882152 /DB_XREF=AV661138 /CLONE=GLCGPA11 /FEA=EST /CNT=4 /TID=Hs.282712.0 /TIER=ConsEnd /STK=4 /UG=Hs.282712 /UG_TITLE=ESTs
CNOT4	210867_at	0.00827447	-1.21714	-0.283498	1.21714	down	-1.24418	-0.315189	1.24418	down	-1.24701	-0.318473	1.24701	down	-1.31787	-0.398206	1.31787	down	0.266235	-0.0172628	-0.0489543	-0.0522384	-0.131971	4850	Hs.490224	gb:AF180475.1 /DB_XREF=gi:6856206 /GEN=NOT4-N /FEA=FLmRNA /CNT=2 /TID=Hs.20423.2 /TIER=FL /STK=0 /UG=Hs.20423 /LL=4850 /DEF=Homo sapiens Not4-Np (NOT4-N) mRNA, complete cds. /PROD=Not4-Np /FL=gb:AF180475.1
TRIQK	225600_at	0.00830814	1.29041	0.367834	1.29041	up	1.53581	0.619004	1.53581	up	1.26208	0.335809	1.26208	up	1.33669	0.418665	1.33669	up	-0.344552	0.0232819	0.274452	-0.00874357	0.0741125	286144	Hs.440643	gb:AW303300 /DB_XREF=gi:6712980 /DB_XREF=xv17d09.x1 /CLONE=IMAGE:2813393 /FEA=EST /CNT=87 /TID=Hs.6390.1 /TIER=Stack /STK=9 /UG=Hs.6390 /UG_TITLE=Homo sapiens clone FLB3344 PRO0845 mRNA, complete cds
SPOP	204640_s_at	0.00832139	-1.23389	-0.303218	1.23389	down	-1.24679	-0.31822	1.24679	down	-1.16414	-0.219269	1.16414	down	-1.13696	-0.185176	1.13696	down	0.178503	-0.124715	-0.139717	-0.0407659	-0.00667267	8405	Hs.740407	gb:NM_003563.1 /DB_XREF=gi:4507182 /GEN=SPOP /FEA=FLmRNA /CNT=55 /TID=Hs.129951.0 /TIER=FL /STK=0 /UG=Hs.129951 /LL=8405 /DEF=Homo sapiens speckle-type POZ protein (SPOP), mRNA. /PROD=speckle-type POZ protein /FL=gb:NM_003563.1 gb:BC003385.1
ZNF252P-AS1	1558790_s_at	0.00833213	1.0029	0.00417641	1.0029	up	1.09042	0.124885	1.09042	up	1.01749	0.0250132	1.01749	up	-1.06297	-0.0881006	1.06297	down	-0.00345781	0.000718594	0.121427	0.0215554	-0.0915585	286103	Hs.359978	gb:AI092855 /DB_XREF=gi:3431831 /DB_XREF=qa77a10.x1 /CLONE=IMAGE:1692762 /TID=Hs2.359978.1 /CNT=8 /FEA=mRNA /TIER=ConsEnd /STK=0 /UG=Hs.359978 /UG_TITLE=Homo sapiens cDNA FLJ35458 fis, clone SMINT2004729.
WSB1	201295_s_at	0.00834126	2.17715	1.12244	2.17715	up	2.19607	1.13492	2.19607	up	1.54513	0.627726	1.54513	up	1.33598	0.4179	1.33598	up	-0.707232	0.415209	0.427693	-0.0795058	-0.289331	26118		gb:BF111821 /DB_XREF=gi:10941511 /DB_XREF=7l36a06.x1 /CLONE=IMAGE:3523474 /FEA=FLmRNA /CNT=305 /TID=Hs.187991.0 /TIER=Stack /STK=16 /UG=Hs.187991 /LL=26118 /UG_GENE=DKFZP564A122 /UG_TITLE=DKFZP564A122 protein /FL=gb:NM_015626.1 gb:AF106684.1
IL23A	220054_at	0.00837471	-1.25146	-0.323608	1.25146	down	-1.32349	-0.404349	1.32349	down	-1.26574	-0.339981	1.26574	down	-1.20427	-0.268157	1.20427	down	0.327658	0.00405004	-0.0766913	-0.0123232	0.0595007	51561	Hs.98309	gb:NM_016584.1 /DB_XREF=gi:7706701 /GEN=SGRF /FEA=FLmRNA /CNT=19 /TID=Hs.98309.0 /TIER=FL+Stack /STK=12 /UG=Hs.98309 /LL=51561 /DEF=Homo sapiens SGRF protein, Interleukin 23 p19 subunit (SGRF), mRNA. /PROD=SGRF protein, Interleukin 23 p19 subunit /FL=gb:NM_016584.1 gb:AF301620.1 gb:AB030000.1
SMYD5	209516_at	0.00837529	-1.07677	-0.106706	1.07677	down	-1.29461	-0.372521	1.29461	down	-1.16171	-0.216254	1.16171	down	-1.15125	-0.203207	1.15125	down	0.205213	0.0985069	-0.167308	-0.0110412	0.00200615	10322	Hs.631882	gb:U50383.1 /DB_XREF=gi:1245371 /GEN=NN8-4AG /FEA=FLmRNA /CNT=92 /TID=Hs.54413.0 /TIER=FL+Stack /STK=28 /UG=Hs.54413 /LL=10322 /DEF=Human retinoic acid-responsive protein (NN8-4AG) mRNA, complete cds. /PROD=NN8-4AG /FL=gb:U50383.1
	1570283_at	0.00840463	1.09661	0.133052	1.09661	up	1.06019	0.0843196	1.06019	up	1.14247	0.192152	1.14247	up	1.12789	0.173622	1.12789	up	-0.0969133	0.0361385	-0.0125937	0.0952389	0.0767087		Hs.638706	gb:BC016014.1 /DB_XREF=gi:18677817 /TID=Hs2.382813.1 /CNT=2 /FEA=mRNA /TIER=ConsEnd /STK=0 /UG=Hs.382813 /UG_TITLE=Homo sapiens, clone IMAGE:4696056, mRNA /DEF=Homo sapiens, clone IMAGE:4696056, mRNA.
SUPT4H1	201483_s_at	0.00841139	1.19602	0.25824	1.19602	up	1.20474	0.268726	1.20474	up	1.28073	0.356962	1.28073	up	1.35741	0.440861	1.35741	up	-0.309873	-0.0516333	-0.0411475	0.0470885	0.130987	6827	Hs.439481	gb:BC002802.1 /DB_XREF=gi:12803910 /FEA=FLmRNA /CNT=250 /TID=Hs.79058.0 /TIER=FL+Stack /STK=32 /UG=Hs.79058 /LL=6827 /UG_GENE=SUPT4H1 /DEF=Homo sapiens, suppressor of Ty (S.cerevisiae) 4 homolog 1, clone MGC:3864, mRNA, complete cds. /PROD=suppressor of Ty (S.cerevisiae) 4 homolog 1 /FL=gb:NM_003168.1 gb:BC002802.1 gb:U38818.1 gb:U38817.1 gb:U43923.1
	1556794_at	0.00841201	1.01594	0.0228212	1.01594	up	1.12466	0.169495	1.12466	up	1.07215	0.100505	1.07215	up	1.05661	0.0794408	1.05661	up	-0.0702575	-0.0474362	0.0992371	0.0302477	0.00918336		Hs.703018	gb:AI740788 /DB_XREF=gi:5109076 /DB_XREF=wg24c01.x1 /CLONE=IMAGE:2366016 /TID=Hs2.273240.1 /CNT=4 /FEA=mRNA /TIER=ConsEnd /STK=2 /UG=Hs.273240 /UG_TITLE=Homo sapiens cDNA FLJ33615 fis, clone BRAMY2018396.
PPFIA1	210236_at	0.00841323	1.43086	0.516886	1.43086	up	1.17349	0.230803	1.17349	up	1.01315	0.0188488	1.01315	up	1.0201	0.0287151	1.0201	up	-0.082528	0.434358	0.148275	-0.0636791	-0.0538129	8500	Hs.530749	gb:U22815.1 /DB_XREF=gi:930340 /FEA=FLmRNA /CNT=15 /TID=Hs.183648.1 /TIER=FL /STK=2 /UG=Hs.183648 /LL=8500 /UG_GENE=PPFIA1 /DEF=Human LAR-interacting protein 1a mRNA, complete cds. /PROD=LAR-interacting protein 1a /FL=gb:U22815.1
FBXO9	1566507_a_at	0.00844797	1.21592	0.282049	1.21592	up	1.292	0.369606	1.292	up	1.26872	0.343374	1.26872	up	1.27976	0.355872	1.27976	up	-0.282542	-0.000492891	0.0870635	0.0608322	0.0733298	26268		gb:AK095315.1 /DB_XREF=gi:21754550 /TID=Hs2.377970.2 /CNT=1 /FEA=mRNA /TIER=ConsEnd /STK=0 /UG=Hs.377970 /UG_TITLE=Homo sapiens cDNA FLJ37996 fis, clone CTONG2011920, weakly similar to Homo sapiens NY-REN-57 antigen mRNA. /DEF=Homo sapiens cDNA FLJ37996 fis, clone CTONG2011920, weakly similar to Homo sapiens NY-REN-57 antigen mRNA.
FAM110B	221959_at	0.00847595	1.76138	0.816702	1.76138	up	1.78211	0.833585	1.78211	up	1.47938	0.564992	1.47938	up	1.49274	0.57796	1.49274	up	-0.381696	0.435006	0.451889	0.183296	0.196263	90362	Hs.154652	gb:BE672313 /DB_XREF=gi:10032854 /DB_XREF=7a59b10.x1 /CLONE=IMAGE:3223003 /FEA=mRNA /CNT=52 /TID=Hs.34054.0 /TIER=Stack /STK=13 /UG=Hs.34054 /UG_TITLE=Homo sapiens cDNA: FLJ22488 fis, clone HRC10948, highly similar to HSU79298 Human clone 23803 mRNA
LINC01588	239777_at	0.00860558	-1.1424	-0.192072	1.1424	down	-1.15884	-0.212683	1.15884	down	-1.15383	-0.206437	1.15383	down	-1.15508	-0.207999	1.15508	down	0.17807	-0.0140014	-0.0346125	-0.0283666	-0.0299283	283551		gb:BF691523 /DB_XREF=gi:11976931 /DB_XREF=602248102F1 /CLONE=IMAGE:4333368 /FEA=EST /CNT=7 /TID=Hs.296320.1 /TIER=ConsEnd /STK=2 /UG=Hs.296320 /UG_TITLE=ESTs
FOXP2	1555352_at	0.00863691	1.00123	0.00177043	1.00123	up	1.15543	0.208435	1.15543	up	1.03766	0.0533361	1.03766	up	-1.0295	-0.0419471	1.0295	down	-0.0270217	-0.0252513	0.181414	0.0263145	-0.0689687	93986		gb:AF467257.1 /DB_XREF=gi:21518698 /GEN=FOXP2 /TID=Hs2Affx.1.231 /CNT=1 /FEA=FLmRNA /TIER=FL /STK=1 /NOTE=sequence(s) not in UniGene /DEF=Homo sapiens clone HF2B2 forkheadwinged helix transcription factor (FOXP2) mRNA, complete cds; alternatively spliced. /PROD=forkheadwinged helix transcription factor /FL=gb:AF467257.1
SSTR2	233310_at	0.00863924	1.14343	0.193371	1.14343	up	1.06947	0.0968905	1.06947	up	1.17749	0.23572	1.17749	up	1.12491	0.169813	1.12491	up	-0.141346	0.0520247	-0.0444554	0.0943742	0.0284667	6752	Hs.731721	gb:AF131798.1 /DB_XREF=gi:4406627 /FEA=mRNA /CNT=4 /TID=Hs.306358.0 /TIER=ConsEnd /STK=0 /UG=Hs.306358 /UG_TITLE=Homo sapiens clone 25119 mRNA sequence /DEF=Homo sapiens clone 25119 mRNA sequence.
CYLC2	207780_at	0.00865051	1.00088	0.00127055	1.00088	up	1.092	0.126974	1.092	up	1.10119	0.139061	1.10119	up	1.08359	0.115815	1.08359	up	-0.0610654	-0.0597948	0.065909	0.077996	0.0547501	1539	Hs.3232	gb:NM_001340.1 /DB_XREF=gi:4557508 /GEN=CYLC2 /FEA=FLmRNA /CNT=4 /TID=Hs.3232.0 /TIER=FL /STK=0 /UG=Hs.3232 /LL=1539 /DEF=Homo sapiens cylicin, basic protein of sperm head cytoskeleton 2 (CYLC2), mRNA. /PROD=cylicin 2 /FL=gb:NM_001340.1
ZBTB7A	213303_x_at	0.00865724	-1.21564	-0.281714	1.21564	down	-1.37753	-0.46208	1.37753	down	-1.36675	-0.450751	1.36675	down	-1.33784	-0.419908	1.33784	down	0.440856	0.159143	-0.0212232	-0.00989434	0.0209483	51341	Hs.591384	gb:AF097916.1 /DB_XREF=gi:3860088 /GEN=FBI1 /FEA=FLmRNA /CNT=59 /TID=Hs.104640.2 /TIER=ConsEnd /STK=0 /UG=Hs.104640 /LL=51341 /DEF=Homo sapiens HIV-1 inducer of short transcripts binding protein (FBI1) mRNA, complete cds. /PROD=HIV-1 inducer of short transcripts bindingprotein /FL=gb:NM_015898.1 gb:AF097916.1
CLCN4	217556_at	0.00865804	-1.11637	-0.158821	1.11637	down	-1.14421	-0.194354	1.14421	down	-1.06514	-0.0910412	1.06514	down	1.04113	0.0581528	1.04113	up	0.106962	-0.0518596	-0.0873926	0.0159206	0.165115	1183	Hs.495674	gb:W26966 /DB_XREF=gi:1306194 /DB_XREF=16h5 /FEA=EST /CNT=7 /TID=Hs.293838.0 /TIER=ConsEnd /STK=0 /UG=Hs.293838 /UG_TITLE=ESTs
PDGFC	218718_at	0.00866981	2.52867	1.33838	2.52867	up	2.76851	1.46911	2.76851	up	2.46261	1.30019	2.46261	up	1.86483	0.899043	1.86483	up	-0.827823	0.510556	0.641286	0.472366	0.0712202	56034	Hs.570855	gb:NM_016205.1 /DB_XREF=gi:9994186 /GEN=PDGFC /FEA=FLmRNA /CNT=76 /TID=Hs.43080.0 /TIER=FL+Stack /STK=29 /UG=Hs.43080 /LL=56034 /DEF=Homo sapiens platelet derived growth factor C (PDGFC), mRNA. /PROD=secretory growth factor-like protein fallotein /FL=gb:NM_016205.1 gb:AB033831.1 gb:AF091434.1 gb:AF244813.1
PREX2	228692_at	0.0086947	1.00617	0.00887835	1.00617	up	1.07143	0.0995322	1.07143	up	1.0355	0.0503217	1.0355	up	1.07653	0.106387	1.07653	up	-0.0439284	-0.03505	0.0556038	0.00639333	0.062459	80243	Hs.732080	gb:N63377 /DB_XREF=gi:1211206 /DB_XREF=yz35c12.s1 /CLONE=IMAGE:285046 /FEA=mRNA /CNT=23 /TID=Hs.169943.0 /TIER=Stack /STK=15 /UG=Hs.169943 /UG_TITLE=Homo sapiens cDNA FLJ13569 fis, clone PLACE1008369
	244507_at	0.00873237	1.06373	0.0891286	1.06373	up	1.09672	0.133198	1.09672	up	1.10305	0.141492	1.10305	up	1.06891	0.0961414	1.06891	up	-0.0607849	0.0283436	0.0724135	0.080707	0.0353564		Hs.561089	gb:AA905023 /DB_XREF=gi:3040146 /DB_XREF=ok09c06.s1 /CLONE=IMAGE:1507306 /FEA=EST /CNT=4 /TID=Hs.130769.0 /TIER=ConsEnd /STK=3 /UG=Hs.130769 /UG_TITLE=ESTs
	238822_at	0.0087499	-1.11684	-0.159421	1.11684	down	-1.19904	-0.261883	1.19904	down	-1.21246	-0.277936	1.21246	down	-1.19144	-0.252703	1.19144	down	0.245258	0.085837	-0.0166251	-0.0326785	-0.00744507		Hs.598557	gb:AI743753 /DB_XREF=gi:5112041 /DB_XREF=wg53e03.x1 /CLONE=IMAGE:2368828 /FEA=EST /CNT=6 /TID=Hs.96168.0 /TIER=ConsEnd /STK=4 /UG=Hs.96168 /UG_TITLE=ESTs
PALLD	200897_s_at	0.00875724	-2.39752	-1.26155	2.39752	down	-1.01812	-0.0259053	1.01812	down	1.09101	0.12566	1.09101	up	-1.50682	-0.591505	1.50682	down	0.213638	-1.04791	0.187733	0.339298	-0.377867	23022	Hs.151220	gb:NM_016081.1 /DB_XREF=gi:7706354 /GEN=KIAA0992 /FEA=FLmRNA /CNT=425 /TID=Hs.194431.0 /TIER=FL+Stack /STK=152 /UG=Hs.194431 /LL=23022 /DEF=Homo sapiens palladin (KIAA0992), mRNA. /PROD=palladin /FL=gb:AF151909.1 gb:AF077041.1 gb:NM_016081.1
TOR1AIP1	216100_s_at	0.00877209	1.4371	0.523156	1.4371	up	1.68977	0.756825	1.68977	up	1.48752	0.572913	1.48752	up	1.31186	0.391615	1.31186	up	-0.474482	0.0486735	0.282342	0.0984304	-0.0828672	26092	Hs.496459	gb:BG289527 /DB_XREF=gi:13045417 /DB_XREF=602384379F1 /CLONE=IMAGE:4513362 /FEA=mRNA /CNT=2 /TID=Hs.234265.2 /TIER=ConsEnd /STK=0 /UG=Hs.234265 /LL=26092 /UG_GENE=DKFZP586G011 /UG_TITLE=DKFZP586G011 protein
ZNF333	1559674_at	0.00877423	1.14582	0.196386	1.14582	up	1.12854	0.174461	1.12854	up	1.13	0.176316	1.13	up	-1.00627	-0.00901369	1.00627	down	-0.0904766	0.105909	0.0839849	0.0858398	-0.0994903	84449	Hs.515215	gb:BC012344.1 /DB_XREF=gi:15214435 /TID=Hs2.343604.1 /CNT=5 /FEA=mRNA /TIER=ConsEnd /STK=0 /UG=Hs.343604 /UG_TITLE=Homo sapiens, clone IMAGE:4554612, mRNA /DEF=Homo sapiens, clone IMAGE:4554612, mRNA.
PRKD2	241669_x_at	0.00880605	-1.25947	-0.332813	1.25947	down	-1.14607	-0.1967	1.14607	down	-1.32728	-0.408476	1.32728	down	-1.48401	-0.569496	1.48401	down	0.238774	-0.0940395	0.0420736	-0.169702	-0.330722	25865	Hs.466987	gb:AI251399 /DB_XREF=gi:3847928 /DB_XREF=qv38c04.x1 /CLONE=IMAGE:1983846 /FEA=EST /CNT=7 /TID=Hs.145334.0 /TIER=ConsEnd /STK=0 /UG=Hs.145334 /UG_TITLE=ESTs
CWF19L2	1566514_at	0.00881028	-1.0345	-0.0489337	1.0345	down	1.10481	0.143804	1.10481	up	1.0572	0.0802442	1.0572	up	-1.01753	-0.0250674	1.01753	down	-0.041694	-0.0906277	0.10211	0.0385501	-0.0667614	143884	Hs.212140	gb:AL713739.1 /DB_XREF=gi:19584478 /TID=Hs2.375787.1 /CNT=1 /FEA=mRNA /TIER=ConsEnd /STK=0 /UG=Hs.375787 /UG_TITLE=Homo sapiens mRNA; cDNA DKFZp667M218 (from clone DKFZp667M218) /DEF=Homo sapiens mRNA; cDNA DKFZp667M218 (from clone DKFZp667M218).
ZDHHC3	218077_s_at	0.00884086	1.49024	0.575543	1.49024	up	1.53372	0.617035	1.53372	up	1.349	0.431886	1.349	up	1.36864	0.452738	1.36864	up	-0.392564	0.182979	0.224471	0.0393224	0.0601747	51304	Hs.61430	gb:BE542551 /DB_XREF=gi:9771196 /DB_XREF=601063935F1 /CLONE=IMAGE:3450249 /FEA=FLmRNA /CNT=173 /TID=Hs.14896.0 /TIER=Stack /STK=34 /UG=Hs.14896 /LL=51304 /UG_GENE=LOC51304 /UG_TITLE=DHHC1 protein /FL=gb:NM_016598.1 gb:AF247703.1
	243819_at	0.00885786	1.02674	0.0380687	1.02674	up	1.81955	0.863581	1.81955	up	1.3661	0.450058	1.3661	up	1.00225	0.00323659	1.00225	up	-0.349517	-0.311448	0.514064	0.100542	-0.34628			gb:AU146329 /DB_XREF=gi:11007850 /DB_XREF=AU146329 /CLONE=HEMBB1000166 /FEA=EST /CNT=3 /TID=Hs.187772.0 /TIER=ConsEnd /STK=3 /UG=Hs.187772 /UG_TITLE=ESTs
ARMC8	203487_s_at	0.00886032	1.12356	0.168082	1.12356	up	1.35365	0.436856	1.35365	up	1.24327	0.314142	1.24327	up	1.24108	0.311596	1.24108	up	-0.297917	-0.129835	0.138939	0.0162255	0.0136793	25852	Hs.744868	gb:NM_015396.1 /DB_XREF=gi:7661561 /GEN=DKFZP434A043 /FEA=FLmRNA /CNT=138 /TID=Hs.102708.0 /TIER=FL+Stack /STK=31 /UG=Hs.102708 /LL=25852 /DEF=Homo sapiens DKFZP434A043 protein (DKFZP434A043), mRNA. /PROD=DKFZP434A043 protein /FL=gb:NM_015396.1
	236256_at	0.00886621	-1.02969	-0.0422162	1.02969	down	1.11396	0.155697	1.11396	up	1.04969	0.0699609	1.04969	up	-1.02478	-0.0353197	1.02478	down	-0.0247644	-0.0669806	0.130932	0.0451965	-0.060084		Hs.600025	gb:AW993690 /DB_XREF=gi:8253865 /DB_XREF=RC3-BN0034-110300-014-a08 /FEA=EST /CNT=13 /TID=Hs.292934.0 /TIER=ConsEnd /STK=1 /UG=Hs.292934 /UG_TITLE=ESTs
	242143_at	0.00887379	1.31674	0.396967	1.31674	up	1.55678	0.638569	1.55678	up	1.32106	0.401699	1.32106	up	1.16266	0.217427	1.16266	up	-0.3966	0.0003669	0.241968	0.00509862	-0.179173		Hs.611969	gb:BE674964 /DB_XREF=gi:10035505 /DB_XREF=7f11b09.x1 /CLONE=IMAGE:3294329 /FEA=EST /CNT=6 /TID=Hs.190065.0 /TIER=ConsEnd /STK=3 /UG=Hs.190065 /UG_TITLE=ESTs
ID4	209291_at	0.00891434	-1.06049	-0.0847312	1.06049	down	1.03787	0.0536251	1.03787	up	-1.02015	-0.0287851	1.02015	down	1.0895	0.123672	1.0895	up	0.0022278	-0.0825034	0.0558529	-0.0265573	0.1259	3400	Hs.519601///Hs.663469	gb:AW157094 /DB_XREF=gi:6228495 /DB_XREF=au91g11.x1 /CLONE=IMAGE:2783684 /FEA=FLmRNA /CNT=175 /TID=Hs.34853.0 /TIER=Stack /STK=26 /UG=Hs.34853 /LL=3400 /UG_GENE=ID4 /UG_TITLE=inhibitor of DNA binding 4, dominant negative helix-loop-helix protein /FL=gb:NM_001546.1 gb:U16153.1 gb:U28368.1
	1561597_x_at	0.00891481	-1.17252	-0.229611	1.17252	down	-1.05123	-0.0720761	1.05123	down	-1.11922	-0.162489	1.11922	down	-1.16442	-0.219614	1.16442	down	0.124447	-0.105164	0.052371	-0.038042	-0.0951671		Hs.684421	gb:BI599467 /DB_XREF=gi:15492406 /DB_XREF=603246129F1 /CLONE=IMAGE:5288527 /TID=Hs2.373676.1 /CNT=2 /FEA=mRNA /TIER=ConsEnd /STK=1 /UG=Hs.373676 /UG_TITLE=Homo sapiens, clone IMAGE:5288527, mRNA
SAXO2	1556158_at	0.00891807	-1.05974	-0.0837163	1.05974	down	-1.06246	-0.0874125	1.06246	down	1.02886	0.0410428	1.02886	up	-1.02383	-0.0339715	1.02383	down	0.0445658	-0.0391505	-0.0428467	0.0856085	0.0105943	283726	Hs.459117	gb:AL833762.1 /DB_XREF=gi:21734412 /TID=Hs2.363430.1 /CNT=7 /FEA=mRNA /TIER=ConsEnd /STK=5 /UG=Hs.363430 /UG_TITLE=Homo sapiens mRNA; cDNA DKFZp666G057 (from clone DKFZp666G057) /DEF=Homo sapiens mRNA; cDNA DKFZp666G057 (from clone DKFZp666G057).
HNRNPK	200097_s_at	0.00892849	-1.04656	-0.0656516	1.04656	down	-1.10795	-0.147892	1.10795	down	-1.14612	-0.196755	1.14612	down	-1.22644	-0.29448	1.22644	down	0.164734	0.0990828	0.0168423	-0.0320208	-0.129745	3190	Hs.522257	gb:AI701949 /DB_XREF=gi:4989849 /DB_XREF=tq09c07.x1 /CLONE=IMAGE:2208300 /FEA=mRNA /CNT=50 /TID=Hs.129548.1 /TIER=ConsEnd /STK=2 /UG=Hs.129548 /LL=3190 /UG_GENE=HNRPK /UG_TITLE=heterogeneous nuclear ribonucleoprotein K
	243489_at	0.00893207	-1.11344	-0.155018	1.11344	down	2.44515	1.28993	2.44515	up	1.08178	0.113405	1.08178	up	-1.54668	-0.629175	1.54668	down	0.277347	0.12233	1.56727	0.390752	-0.351828			gb:BF514098 /DB_XREF=gi:11599277 /DB_XREF=UI-H-BW1-amw-d-05-0-UI.s1 /CLONE=IMAGE:3071288 /FEA=EST /CNT=3 /TID=Hs.290167.0 /TIER=ConsEnd /STK=3 /UG=Hs.290167 /UG_TITLE=ESTs
IGHV7-81	1555179_at	0.0089582	1.08758	0.121123	1.08758	up	1.07916	0.109909	1.07916	up	1.1335	0.180785	1.1335	up	1.04954	0.0697508	1.04954	up	-0.0983778	0.0227451	0.0115308	0.0824068	-0.028627	28378	Hs.737487	gb:BC032733.1 /DB_XREF=gi:21619787 /TID=Hs2.375094.1 /CNT=2 /FEA=FLmRNA /TIER=FL /STK=1 /UG=Hs.375094 /DEF=Homo sapiens, similar to immunogloblin heavy chain variable region, clone MGC:45495 IMAGE:5552881, mRNA, complete cds. /PROD=similar to immunogloblin heavy chain variableregion /FL=gb:BC032733.1
SDK1	229407_at	0.00897435	1.11922	0.162492	1.11922	up	1.07569	0.105259	1.07569	up	1.08722	0.120638	1.08722	up	1.15439	0.20713	1.15439	up	-0.10438	0.0581124	0.000878996	0.0162583	0.10275	221935	Hs.653013	gb:AF131799.1 /DB_XREF=gi:4406628 /FEA=mRNA /CNT=28 /TID=Hs.21192.0 /TIER=Stack /STK=19 /UG=Hs.21192 /UG_TITLE=Homo sapiens clone 25155 mRNA sequence /DEF=Homo sapiens clone 25155 mRNA sequence.
TRMT10A	231877_at	0.00898558	1.13722	0.18551	1.13722	up	1.11568	0.157917	1.11568	up	1.11895	0.162149	1.11895	up	1.16818	0.224257	1.16818	up	-0.129467	0.0560436	0.0284507	0.0326821	0.0947899	93587	Hs.380412	gb:AL515270 /DB_XREF=gi:12778763 /DB_XREF=AL515270 /CLONE=CL0BB016ZA10 (5 prime) /FEA=mRNA /CNT=32 /TID=Hs.209927.0 /TIER=ConsEnd /STK=0 /UG=Hs.209927 /UG_TITLE=Homo sapiens cDNA FLJ20325 fis, clone HEP09891, highly similar to AF106046 Homo sapiens unknown mRNA
PHB	200659_s_at	0.008988	-1.16183	-0.216394	1.16183	down	-1.249	-0.320771	1.249	down	-1.23996	-0.310291	1.23996	down	-1.15781	-0.211394	1.15781	down	0.216925	0.000530826	-0.103846	-0.0933669	0.00553036	5245	Hs.514303	gb:NM_002634.2 /DB_XREF=gi:6031190 /GEN=PHB /FEA=FLmRNA /CNT=452 /TID=Hs.75323.0 /TIER=FL+Stack /STK=77 /UG=Hs.75323 /LL=5245 /DEF=Homo sapiens prohibitin (PHB), mRNA. /PROD=prohibitin /FL=gb:NM_002634.2
	236549_x_at	0.0089886	-1.03955	-0.0559651	1.03955	down	-1.01774	-0.0253705	1.01774	down	-1.06394	-0.0894154	1.06394	down	-1.14922	-0.200652	1.14922	down	0.0348225	-0.0211425	0.009452	-0.0545929	-0.16583			gb:AW104269 /DB_XREF=gi:6075004 /DB_XREF=xd70h07.x1 /CLONE=IMAGE:2603005 /FEA=EST /CNT=14 /TID=Hs.145088.0 /TIER=ConsEnd /STK=5 /UG=Hs.145088 /UG_TITLE=ESTs, Weakly similar to Similar to cuticular collagen (C.elegans)
MGC24103	232568_at	0.0089972	-1.0471	-0.0663965	1.0471	down	1.10915	0.149459	1.10915	up	1.00399	0.00575094	1.00399	up	-1.11487	-0.156873	1.11487	down	0.0318248	-0.0345717	0.181284	0.0375757	-0.125048	158295	Hs.664877	gb:AU145658 /DB_XREF=gi:11007179 /DB_XREF=AU145658 /CLONE=HEMBA1005426 /FEA=mRNA /CNT=7 /TID=Hs.287447.0 /TIER=ConsEnd /STK=2 /UG=Hs.287447 /UG_TITLE=Homo sapiens cDNA FLJ11733 fis, clone HEMBA1005426
DIDO1	222595_s_at	0.00900661	-1.08035	-0.111492	1.08035	down	-1.16907	-0.225366	1.16907	down	-1.29135	-0.368884	1.29135	down	-1.1754	-0.233154	1.1754	down	0.18836	0.0768672	-0.0370067	-0.180524	-0.0447947	11083	Hs.517172	gb:AL578222 /DB_XREF=gi:12942093 /DB_XREF=AL578222 /CLONE=CS0DK002YJ13 (3 prime) /FEA=FLmRNA /CNT=134 /TID=Hs.155313.0 /TIER=Stack /STK=8 /UG=Hs.155313 /LL=11083 /UG_GENE=DATF1 /UG_TITLE=death associated transcription factor 1 /FL=gb:NM_022105.1 gb:BC004237.1
POFUT1	212349_at	0.00902097	-1.16964	-0.226064	1.16964	down	-1.07978	-0.110736	1.07978	down	-1.15164	-0.203695	1.15164	down	-1.21037	-0.275452	1.21037	down	0.153688	-0.0723759	0.042952	-0.050007	-0.121764	23509	Hs.472409	gb:AL045513 /DB_XREF=gi:5433649 /DB_XREF=DKFZp434J015_r1 /CLONE=DKFZp434J015 /FEA=mRNA /CNT=152 /TID=Hs.178292.0 /TIER=Stack /STK=58 /UG=Hs.178292 /LL=23509 /UG_GENE=KIAA0180 /UG_TITLE=KIAA0180 protein
ADRB1	229309_at	0.00903235	-1.1553	-0.208264	1.1553	down	-1.11482	-0.156809	1.11482	down	-1.15258	-0.204869	1.15258	down	-1.20254	-0.266084	1.20254	down	0.204661	-0.00360272	0.0478524	-0.000208294	-0.0614225	153	Hs.99913	gb:AI625747 /DB_XREF=gi:4650678 /DB_XREF=ty65h06.x1 /CLONE=IMAGE:2283995 /FEA=mRNA /CNT=23 /TID=Hs.37744.0 /TIER=Stack /STK=11 /UG=Hs.37744 /UG_TITLE=Homo sapiens beta-1 adrenergic receptor mRNA, 3 prime UTR
LOC100505915	81737_at	0.00913958	-1.19037	-0.251413	1.19037	down	-1.00956	-0.013733	1.00956	down	-1.11235	-0.153605	1.11235	down	-1.17763	-0.235892	1.17763	down	0.121748	-0.129665	0.108015	-0.0318572	-0.114144	100505915	Hs.674950///Hs.678758	Cluster Incl. AI424872:tg38f10.x1 Homo sapiens cDNA, 3 end /clone=IMAGE-2111083 /clone_end=3' /gb=AI424872 /gi=4270895 /ug=Hs.159375 /len=443
	234207_at	0.00914128	1.00701	0.0100777	1.00701	up	1.13309	0.180266	1.13309	up	1.06602	0.0922385	1.06602	up	1.02518	0.035878	1.02518	up	-0.0581871	-0.0481094	0.122079	0.0340514	-0.0223091		Hs.588637	gb:AK025017.1 /DB_XREF=gi:10437451 /FEA=mRNA /CNT=1 /TID=Hs.306746.0 /TIER=ConsEnd /STK=0 /UG=Hs.306746 /UG_TITLE=Homo sapiens cDNA: FLJ21364 fis, clone COL02989 /DEF=Homo sapiens cDNA: FLJ21364 fis, clone COL02989.
PMCH	206942_s_at	0.00919962	1.07231	0.10072	1.07231	up	-1.03042	-0.0432278	1.03042	down	1.0908	0.125381	1.0908	up	1.09827	0.135232	1.09827	up	-0.0606513	0.0400689	-0.103879	0.0647295	0.074581	5367	Hs.707990	gb:NM_002674.1 /DB_XREF=gi:4505898 /GEN=PMCH /FEA=FLmRNA /CNT=8 /TID=Hs.2182.0 /TIER=FL /STK=0 /UG=Hs.2182 /LL=5367 /DEF=Homo sapiens pro-melanin-concentrating hormone (PMCH), mRNA. /PROD=pro-melanin-concentrating hormone /FL=gb:NM_002674.1 gb:M57703.1
CACNA1H	205845_at	0.00921739	1.16418	0.219319	1.16418	up	1.01495	0.0214146	1.01495	up	1.14871	0.200012	1.14871	up	1.12876	0.174739	1.12876	up	-0.101013	0.118306	-0.0795986	0.0989985	0.0737262	8912	Hs.459642	gb:NM_021098.1 /DB_XREF=gi:10864076 /GEN=CACNA1H /FEA=FLmRNA /CNT=24 /TID=Hs.122359.0 /TIER=FL /STK=0 /UG=Hs.122359 /LL=8912 /DEF=Homo sapiens calcium channel, voltage-dependent, alpha 1H subunit (CACNA1H), mRNA. /PROD=calcium channel, voltage-dependent, alpha 1Hsubunit /FL=gb:AF051946.2 gb:AF073931.1 gb:NM_021098.1
ITGB3	204626_s_at	0.00921953	1.25823	0.331398	1.25823	up	1.15089	0.202746	1.15089	up	1.34592	0.428589	1.34592	up	1.73765	0.797139	1.73765	up	-0.216358	0.11504	-0.0136121	0.21223	0.58078	3690	Hs.218040	gb:J02703.1 /DB_XREF=gi:183452 /GEN=ITGB3 /FEA=FLmRNA /CNT=66 /TID=Hs.87149.0 /TIER=FL /STK=0 /UG=Hs.87149 /LL=3690 /UG_TITLE=integrin, beta 3 (platelet glycoprotein IIIa, antigen CD61) /DEF=Human endothelial membrane glycoprotein IIIa (GPIIIa) mRNA, complete cds. /FL=gb:J02703.1 gb:M35999.1 gb:M20311.1 gb:NM_000212.1
NF1	211094_s_at	0.00922486	1.23081	0.299605	1.23081	up	1.27775	0.353611	1.27775	up	1.19505	0.257074	1.19505	up	1.03454	0.0489901	1.03454	up	-0.126422	0.173182	0.227188	0.130651	-0.0774322	4763	Hs.113577	gb:D12625.1 /DB_XREF=gi:219939 /GEN=NF1 /FEA=FLmRNA /CNT=1 /TID=Hs.93207.2 /TIER=FL /STK=0 /UG=Hs.93207 /LL=4763 /DEF=Human mRNA for NF1 protein isoform (neurofibromin isoform), complete cds. /PROD=NF1 protein isoform /FL=gb:D12625.1
	244262_x_at	0.00925851	1.0713	0.0993614	1.0713	up	1.10024	0.137817	1.10024	up	1.13571	0.183598	1.13571	up	1.07178	0.100003	1.07178	up	-0.109087	-0.00972525	0.0287303	0.0745109	-0.00908372		Hs.221074	gb:T91980 /DB_XREF=gi:723893 /DB_XREF=yd55g03.s1 /CLONE=IMAGE:112180 /FEA=EST /CNT=3 /TID=Hs.221074.0 /TIER=ConsEnd /STK=3 /UG=Hs.221074 /UG_TITLE=ESTs
LOC101930370	240212_at	0.00925981	1.01858	0.0265528	1.01858	up	-1.06915	-0.0964681	1.06915	down	1.03662	0.0518929	1.03662	up	1.06511	0.0910003	1.06511	up	-0.00603305	0.0205198	-0.102501	0.0458598	0.0849673	101930370	Hs.563191	gb:AW340175 /DB_XREF=gi:6836801 /DB_XREF=hd02h03.x1 /CLONE=IMAGE:2908373 /FEA=EST /CNT=4 /TID=Hs.120361.0 /TIER=ConsEnd /STK=4 /UG=Hs.120361 /UG_TITLE=ESTs
	217205_at	0.00926914	1.02123	0.0303036	1.02123	up	-1.10772	-0.147596	1.10772	down	-1.19238	-0.253847	1.19238	down	-1.14675	-0.197545	1.14675	down	0.152363	0.182666	0.00476631	-0.101484	-0.045182			gb:Y08772 /DB_XREF=gi:1770485 /FEA=DNA /CNT=1 /TID=Hs.247983.0 /TIER=ConsEnd /STK=0 /UG=Hs.247983 /UG_TITLE=H.sapiens PABII pseudogene /DEF=H.sapiens PABII pseudogene
MSTO1	222584_at	0.00930812	-1.2579	-0.331019	1.2579	down	-1.32172	-0.402416	1.32172	down	-1.25395	-0.326484	1.25395	down	-1.2732	-0.34846	1.2732	down	0.250647	-0.0803721	-0.151769	-0.0758369	-0.0978129	55154	Hs.656547///Hs.720829	gb:AL573591 /DB_XREF=gi:12932974 /DB_XREF=AL573591 /CLONE=CS0DI052YA12 (3 prime) /FEA=FLmRNA /CNT=94 /TID=Hs.279763.0 /TIER=Stack /STK=25 /UG=Hs.279763 /LL=55154 /UG_GENE=FLJ10504 /UG_TITLE=hypothetical protein FLJ10504 /FL=gb:NM_018116.1
TBC1D2B	215640_at	0.00930901	1.25164	0.323817	1.25164	up	1.15066	0.202457	1.15066	up	1.27715	0.352929	1.27715	up	1.07219	0.100555	1.07219	up	-0.192731	0.131085	0.00972597	0.160197	-0.0921762	23102		gb:AK000173.1 /DB_XREF=gi:7020086 /FEA=mRNA /CNT=3 /TID=Hs.306386.0 /TIER=ConsEnd /STK=0 /UG=Hs.306386 /UG_TITLE=Homo sapiens cDNA FLJ20166 fis, clone COL09511 /DEF=Homo sapiens cDNA FLJ20166 fis, clone COL09511.
COL4A3BP	219625_s_at	0.00935613	1.35522	0.438532	1.35522	up	1.57467	0.655047	1.57467	up	1.46075	0.546706	1.46075	up	1.32309	0.403907	1.32309	up	-0.449845	-0.0113135	0.205202	0.0968606	-0.0459381	10087	Hs.270437	gb:NM_005713.1 /DB_XREF=gi:5031716 /GEN=COL4A3BP /FEA=FLmRNA /CNT=26 /TID=Hs.21276.0 /TIER=FL /STK=0 /UG=Hs.21276 /LL=10087 /DEF=Homo sapiens collagen, type IV, alpha 3 (Goodpasture antigen) binding protein (COL4A3BP), mRNA. /PROD=collagen, type IV, alpha 3 (Goodpasture antigen)binding protein /FL=gb:NM_005713.1 gb:AF136450.1
PEAK1	225913_at	0.00935839	1.29163	0.369191	1.29163	up	1.63072	0.70551	1.63072	up	1.26879	0.343456	1.26879	up	1.23633	0.306061	1.23633	up	-0.348979	0.0202124	0.356531	-0.00552225	-0.0429179	79834	Hs.9587	gb:AK025943.1 /DB_XREF=gi:10438614 /FEA=mRNA /CNT=71 /TID=Hs.9587.0 /TIER=Stack /STK=36 /UG=Hs.9587 /UG_TITLE=Homo sapiens cDNA: FLJ22290 fis, clone HRC04405 /DEF=Homo sapiens cDNA: FLJ22290 fis, clone HRC04405.
MAPK14	210449_x_at	0.00936414	1.82974	0.871641	1.82974	up	2.32114	1.21483	2.32114	up	2.00826	1.00595	2.00826	up	1.84081	0.880343	1.84081	up	-0.84726	0.024381	0.367571	0.158689	0.0330838	1432	Hs.485233	gb:AF100544.1 /DB_XREF=gi:7109716 /GEN=CSBP /FEA=FLmRNA /CNT=9 /TID=Hs.79107.1 /TIER=FL /STK=0 /UG=Hs.79107 /LL=1432 /DEF=Homo sapiens stress-activated protein kinase 2a (CSBP) mRNA, complete cds. /PROD=stress-activated protein kinase 2a /FL=gb:L35264.1 gb:BC000092.1 gb:AF100544.1
	242134_at	0.0093672	-1.03481	-0.0493717	1.03481	down	1.57662	0.656837	1.57662	up	1.02442	0.0348009	1.02442	up	1.07466	0.103879	1.07466	up	0.0141542	-0.0352175	0.670991	0.0489551	0.118033		Hs.553068	gb:AI733194 /DB_XREF=gi:5054307 /DB_XREF=on22e03.x5 /CLONE=IMAGE:1557436 /FEA=EST /CNT=7 /TID=Hs.126542.0 /TIER=ConsEnd /STK=3 /UG=Hs.126542 /UG_TITLE=ESTs
ANKRD13D	226205_at	0.00936756	-1.09	-0.124324	1.09	down	-1.02994	-0.042563	1.02994	down	-1.16734	-0.22323	1.16734	down	-1.40522	-0.490795	1.40522	down	0.217002	0.0926776	0.174439	-0.00622817	-0.273793	338692	Hs.438673	gb:AW512315 /DB_XREF=gi:7150393 /DB_XREF=xx73a01.x1 /CLONE=IMAGE:2849256 /FEA=EST /CNT=58 /TID=Hs.14337.0 /TIER=Stack /STK=25 /UG=Hs.14337 /UG_TITLE=ESTs, Weakly similar to KE03 protein (H.sapiens)
SUGT1P3	1554142_at	0.00938238	1.0193	0.0275783	1.0193	up	-1.00186	-0.00268508	1.00186	down	-1.01393	-0.0199542	1.01393	down	1.06859	0.0957139	1.06859	up	-0.00802138	0.0195569	-0.0107065	-0.0279756	0.0876925	283507	Hs.660718	gb:BC020814.1 /DB_XREF=gi:18088548 /TID=Hs2.46870.1 /CNT=5 /FEA=FLmRNA /TIER=FL /STK=4 /UG=Hs.46870 /DEF=Homo sapiens, clone MGC:23859 IMAGE:4295904, mRNA, complete cds. /PROD=Unknown (protein for MGC:23859) /FL=gb:BC020814.1
ATP13A3	219558_at	0.00938635	1.33636	0.418308	1.33636	up	1.39679	0.482112	1.39679	up	1.55547	0.63735	1.55547	up	1.47388	0.559622	1.47388	up	-0.435663	-0.0173542	0.0464498	0.201688	0.12396	79572	Hs.529609	gb:NM_024524.1 /DB_XREF=gi:13375667 /GEN=FLJ20986 /FEA=FLmRNA /CNT=25 /TID=Hs.324507.0 /TIER=FL /STK=0 /UG=Hs.324507 /LL=79572 /DEF=Homo sapiens hypothetical protein FLJ20986 (FLJ20986), mRNA. /PROD=hypothetical protein FLJ20986 /FL=gb:NM_024524.1
	1564155_x_at	0.00939047	-1.34137	-0.423703	1.34137	down	-1.48581	-0.57125	1.48581	down	-1.20771	-0.272274	1.20771	down	-1.13259	-0.179623	1.13259	down	0.354797	-0.0689056	-0.216453	0.0825234	0.175174			gb:BC041466.1 /DB_XREF=gi:27370761 /TID=Hs2.434445.1 /CNT=1 /FEA=mRNA /TIER=ConsEnd /STK=0 /UG=Hs.434445 /UG_TITLE=Homo sapiens, clone IMAGE:5213841, mRNA /DEF=Homo sapiens, clone IMAGE:5213841, mRNA.
MALAT1	224567_x_at	0.0094207	-1.16554	-0.221002	1.16554	down	-1.21338	-0.279034	1.21338	down	-1.26337	-0.337282	1.26337	down	-1.3662	-0.450166	1.3662	down	0.207829	-0.0131735	-0.0712047	-0.129453	-0.242337	378938	Hs.621695	gb:BG534952 /DB_XREF=gi:13526495 /DB_XREF=602554141F1 /CLONE=IMAGE:4663594 /FEA=mRNA /CNT=377 /TID=Hs.279789.6 /TIER=Stack /STK=13 /UG=Hs.279789 /LL=8841 /UG_GENE=HDAC3 /UG_TITLE=histone deacetylase 3
NEK8	1557170_at	0.00942886	-1.19498	-0.256989	1.19498	down	-1.18069	-0.239625	1.18069	down	-1.23742	-0.307341	1.23742	down	-1.23955	-0.30982	1.23955	down	0.222503	-0.0344863	-0.017122	-0.0848383	-0.0873169	284086	Hs.448468	gb:AI073943 /DB_XREF=gi:3400587 /DB_XREF=ou65c02.x1 /CLONE=IMAGE:1632674 /TID=Hs2.293894.1 /CNT=14 /FEA=mRNA /TIER=ConsEnd /STK=1 /LL=284086 /UG_GENE=DKFZp434N0419 /UG=Hs.293894 /UG_TITLE=hypothetical protein DKFZp434N0419
WWP2	1554580_a_at	0.00943394	1.05801	0.0813523	1.05801	up	1.13794	0.186427	1.13794	up	1.13156	0.178318	1.13156	up	1.07939	0.11022	1.07939	up	-0.115403	-0.0340504	0.0710244	0.0629152	-0.00518246	11060	Hs.408458	gb:AJ001982.1 /DB_XREF=gi:2546985 /TID=Hs2.422339.1 /CNT=11 /FEA=FLmRNA /TIER=FL /STK=1 /UG=Hs.422339 /UG_TITLE=Homo sapiens WWp2-like mRNA complete cds /DEF=Homo sapiens WWp2-like mRNA complete cds. /FL=gb:AJ001982.1
AARS2	231845_at	0.00951453	-1.35254	-0.435675	1.35254	down	-1.27054	-0.345447	1.27054	down	-1.32043	-0.40101	1.32043	down	-1.31567	-0.395797	1.31567	down	0.284256	-0.151418	-0.0611905	-0.116754	-0.111541	57505	Hs.158381	gb:AI721172 /DB_XREF=gi:5038428 /DB_XREF=as66e12.x1 /CLONE=IMAGE:2333710 /FEA=mRNA /CNT=39 /TID=Hs.197668.0 /TIER=ConsEnd /STK=4 /UG=Hs.197668 /LL=57505 /UG_GENE=KIAA1270 /UG_TITLE=KIAA1270 protein
PLD1	226636_at	0.00952235	1.28257	0.359033	1.28257	up	1.58864	0.667788	1.58864	up	1.40674	0.492352	1.40674	up	1.47761	0.563269	1.47761	up	-0.40076	-0.0417269	0.267028	0.0915917	0.162509	5337	Hs.382865	gb:AI378587 /DB_XREF=gi:4188440 /DB_XREF=tc72c12.x1 /CLONE=IMAGE:2070166 /FEA=EST /CNT=37 /TID=Hs.93837.2 /TIER=Stack /STK=12 /UG=Hs.93837 /LL=9600 /UG_GENE=PITPNM /UG_TITLE=phosphatidylinositol transfer protein, membrane-associated
CCDC93	219774_at	0.00953778	1.4016	0.487072	1.4016	up	1.56548	0.646607	1.56548	up	1.21385	0.279585	1.21385	up	1.36035	0.443974	1.36035	up	-0.296364	0.190708	0.350243	-0.0167789	0.14761	54520	Hs.107845	gb:NM_019044.1 /DB_XREF=gi:9506632 /GEN=FLJ10996 /FEA=FLmRNA /CNT=23 /TID=Hs.98324.0 /TIER=FL /STK=7 /UG=Hs.98324 /LL=54520 /DEF=Homo sapiens hypothetical protein (FLJ10996), mRNA. /PROD=hypothetical protein /FL=gb:NM_019044.1
MYO10	201976_s_at	0.0095393	2.08592	1.06068	2.08592	up	2.35539	1.23596	2.35539	up	1.74827	0.805925	1.74827	up	2.30003	1.20166	2.30003	up	-0.55454	0.506143	0.681423	0.251384	0.647115	4651	Hs.481720	gb:NM_012334.1 /DB_XREF=gi:11037056 /GEN=MYO10 /FEA=FLmRNA /CNT=194 /TID=Hs.61638.0 /TIER=FL+Stack /STK=74 /UG=Hs.61638 /LL=4651 /DEF=Homo sapiens myosin X (MYO10), mRNA. /PROD=myosin X /FL=gb:AF247457.2 gb:NM_012334.1 gb:AF234532.1
GPR141	1563720_at	0.00954766	1.3509	0.433917	1.3509	up	1.5864	0.665754	1.5864	up	1.50249	0.587357	1.50249	up	1.33501	0.416846	1.33501	up	-0.309015	0.124901	0.356739	0.278342	0.107831	353345	Hs.563492	gb:BC043356.1 /DB_XREF=gi:27695921 /TID=Hs2.434161.1 /CNT=1 /FEA=mRNA /TIER=ConsEnd /STK=0 /UG=Hs.434161 /UG_TITLE=Homo sapiens, clone IMAGE:3881224, mRNA /DEF=Homo sapiens, clone IMAGE:3881224, mRNA.
MBTPS1	217543_s_at	0.00955798	-1.21179	-0.277135	1.21179	down	-1.0765	-0.106348	1.0765	down	-1.1119	-0.153033	1.1119	down	-1.14875	-0.200067	1.14875	down	0.129315	-0.14782	0.0229668	-0.0237182	-0.0707522	8720	Hs.75890	gb:BE890314 /DB_XREF=gi:10348509 /DB_XREF=601431767F1 /CLONE=IMAGE:3916816 /FEA=EST /CNT=8 /TID=Hs.314499.0 /TIER=ConsEnd /STK=0 /UG=Hs.314499 /UG_TITLE=ESTs, Moderately similar to T43492 hypothetical protein DKFZp434A219.1 (H.sapiens)
POMGNT1	217944_at	0.0095595	-1.26773	-0.342253	1.26773	down	-1.19918	-0.262051	1.19918	down	-1.21324	-0.278864	1.21324	down	-1.18181	-0.241	1.18181	down	0.227463	-0.11479	-0.0345881	-0.0514012	-0.0135368	55624	Hs.525134	gb:NM_017739.1 /DB_XREF=gi:8923252 /GEN=FLJ20277 /FEA=FLmRNA /CNT=168 /TID=Hs.183860.0 /TIER=FL+Stack /STK=58 /UG=Hs.183860 /LL=55624 /DEF=Homo sapiens hypothetical protein FLJ20277 (FLJ20277), mRNA. /PROD=hypothetical protein FLJ20277 /FL=gb:BC001471.1 gb:NM_017739.1
	244247_at	0.00957906	1.21395	0.279708	1.21395	up	1.00008	0.000116797	1.00008	up	1.05358	0.0752973	1.05358	up	-1.04858	-0.0684395	1.04858	down	-0.00831233	0.271395	-0.00819553	0.0669849	-0.0767518		Hs.664302	gb:AI802768 /DB_XREF=gi:5368240 /DB_XREF=wf18b06.x1 /CLONE=IMAGE:2350931 /FEA=EST /CNT=5 /TID=Hs.116448.0 /TIER=ConsEnd /STK=1 /UG=Hs.116448 /UG_TITLE=ESTs
EFCAB3///LOC102724660	1553392_at	0.00961164	1.05178	0.0728313	1.05178	up	1.09707	0.133661	1.09707	up	1.0144	0.0206226	1.0144	up	1.0187	0.0267358	1.0187	up	-0.0443992	0.0284321	0.0892617	-0.0237766	-0.0176634	146779///102724660	Hs.152670	gb:NM_173503.1 /DB_XREF=gi:27735112 /TID=Hs2.152670.1 /CNT=3 /FEA=FLmRNA /TIER=FL /STK=1 /LL=146779 /UG_GENE=FLJ25818 /UG=Hs.152670 /UG_TITLE=hypothetical protein FLJ25818 /DEF=Homo sapiens hypothetical protein FLJ25818 (FLJ25818), mRNA. /FL=gb:NM_173503.1
NOD1	224190_x_at	0.00964274	1.10915	0.149454	1.10915	up	-1.2436	-0.31452	1.2436	down	-1.20383	-0.267633	1.20383	down	-1.21743	-0.283841	1.21743	down	0.216211	0.365664	-0.0983096	-0.0514226	-0.0676298	10392	Hs.405153	gb:AF126484.1 /DB_XREF=gi:4760399 /FEA=FLmRNA /CNT=1 /TID=Hs.19405.1 /TIER=FL /STK=0 /UG=Hs.19405 /LL=10392 /UG_GENE=NOD1 /DEF=Homo sapiens CARD4 mRNA, complete cds. /PROD=CARD4 /FL=gb:AF126484.1
SSX1	206626_x_at	0.00967726	1.04663	0.0657486	1.04663	up	1.10878	0.148968	1.10878	up	1.14161	0.191075	1.14161	up	1.17569	0.23351	1.17569	up	-0.118237	-0.0524888	0.0307303	0.0728379	0.115272	6756	Hs.434142	gb:BC001003.2 /DB_XREF=gi:12803043 /FEA=FLmRNA /CNT=10 /TID=Hs.194759.0 /TIER=FL /STK=0 /UG=Hs.194759 /LL=6756 /UG_GENE=SSX1 /DEF=Homo sapiens, synovial sarcoma, X breakpoint 1, clone MGC:5162, mRNA, complete cds. /PROD=synovial sarcoma, X breakpoint 1 /FL=gb:BC001003.2 gb:NM_005635.1
ATP8B4	220416_at	0.00969256	2.22391	1.1531	2.22391	up	2.39345	1.25909	2.39345	up	2.52702	1.33744	2.52702	up	1.94407	0.959078	1.94407	up	-0.856138	0.296959	0.402952	0.4813	0.10294	79895	Hs.511311	gb:NM_024837.1 /DB_XREF=gi:13376248 /GEN=FLJ21472 /FEA=FLmRNA /CNT=7 /TID=Hs.182738.0 /TIER=FL /STK=0 /UG=Hs.182738 /LL=79895 /DEF=Homo sapiens hypothetical protein FLJ21472 (FLJ21472), mRNA. /PROD=hypothetical protein FLJ21472 /FL=gb:NM_024837.1
PYROXD2	232942_at	0.00969463	1.04999	0.0703692	1.04999	up	-1.01615	-0.0231172	1.01615	down	-1.06397	-0.0894621	1.06397	down	-1.20391	-0.267731	1.20391	down	0.0944526	0.164822	0.0713354	0.00499047	-0.173278	84795	Hs.238303	gb:AU147503 /DB_XREF=gi:11009024 /DB_XREF=AU147503 /CLONE=MAMMA1000875 /FEA=mRNA /CNT=6 /TID=Hs.292868.0 /TIER=ConsEnd /STK=2 /UG=Hs.292868 /UG_TITLE=Homo sapiens cDNA FLJ12197 fis, clone MAMMA1000875
GSTM5	205752_s_at	0.00971657	1.13578	0.183683	1.13578	up	1.12396	0.168589	1.12396	up	1.2051	0.269157	1.2051	up	1.26102	0.334595	1.26102	up	-0.144284	0.0393995	0.0243052	0.124874	0.190312	2949	Hs.75652	gb:NM_000851.1 /DB_XREF=gi:4504180 /GEN=GSTM5 /FEA=FLmRNA /CNT=43 /TID=Hs.75652.0 /TIER=FL /STK=6 /UG=Hs.75652 /LL=2949 /DEF=Homo sapiens glutathione S-transferase M5 (GSTM5), mRNA. /PROD=glutathione S-transferase M5 /FL=gb:NM_000851.1 gb:L02321.1
BLCAP///LOC105372607///LOC105376973	1556867_at	0.00971675	1.08596	0.118969	1.08596	up	1.075	0.104342	1.075	up	1.04909	0.069138	1.04909	up	-1.00996	-0.0143004	1.00996	down	-0.0480776	0.0708915	0.0562641	0.0210604	-0.062378	10904///105372607///105376973		gb:AW015027 /DB_XREF=gi:5863784 /DB_XREF=UI-H-BI0p-aaz-h-04-0-UI.s1 /CLONE=IMAGE:2711263 /TID=Hs2.409857.1 /CNT=5 /FEA=mRNA /TIER=ConsEnd /STK=2 /UG=Hs.409857 /UG_TITLE=Homo sapiens, clone IMAGE:5311184, mRNA
	229704_at	0.00973778	1.21042	0.275502	1.21042	up	1.99156	0.993897	1.99156	up	1.46537	0.551269	1.46537	up	1.08607	0.119117	1.08607	up	-0.487515	-0.212013	0.506382	0.0637544	-0.368398		Hs.646051	gb:BF111072 /DB_XREF=gi:10940762 /DB_XREF=7n43b02.x1 /CLONE=IMAGE:3567291 /FEA=EST /CNT=15 /TID=Hs.168625.2 /TIER=Stack /STK=9 /UG=Hs.168625 /LL=23047 /UG_GENE=KIAA0979 /UG_TITLE=androgen-induced prostate proliferative shutoff associated protein
PQLC2L	238969_at	0.00976871	-1.02648	-0.0377043	1.02648	down	1.10799	0.147947	1.10799	up	1.09543	0.131494	1.09543	up	1.11616	0.158548	1.11616	up	-0.0737575	-0.111462	0.0741891	0.0577366	0.0847902	152078	Hs.259046	gb:BF512162 /DB_XREF=gi:11597265 /DB_XREF=UI-H-BW1-ami-c-03-0-UI.s1 /CLONE=IMAGE:3070060 /FEA=EST /CNT=7 /TID=Hs.103823.0 /TIER=ConsEnd /STK=4 /UG=Hs.103823 /UG_TITLE=ESTs
HIPK2	225368_at	0.00977392	1.10314	0.141621	1.10314	up	1.46267	0.548607	1.46267	up	1.06675	0.0932161	1.06675	up	1.20448	0.268408	1.20448	up	-0.249131	-0.10751	0.299476	-0.155915	0.0192767	28996	Hs.731417	gb:BF218115 /DB_XREF=gi:11111701 /DB_XREF=601885819F1 /CLONE=IMAGE:4104197 /FEA=EST /CNT=81 /TID=Hs.21906.0 /TIER=Stack /STK=27 /UG=Hs.21906 /UG_TITLE=ESTs
YBX1	216940_x_at	0.00978043	-1.04056	-0.0573612	1.04056	down	-1.11707	-0.159724	1.11707	down	-1.19837	-0.261073	1.19837	down	-1.27974	-0.355851	1.27974	down	0.198903	0.141542	0.0391793	-0.0621699	-0.156948	4904	Hs.473583	gb:X96666 /DB_XREF=gi:1403348 /FEA=DNA /CNT=1 /TID=Hs.74497.2 /TIER=ConsEnd /STK=0 /UG=Hs.74497 /LL=4904 /UG_GENE=NSEP1 /UG_TITLE=nuclease sensitive element binding protein 1 /DEF=H.sapiens YB-1 gene promoter region
PDCD5	219275_at	0.00978681	-1.06217	-0.0870151	1.06217	down	-1.11091	-0.151746	1.11091	down	-1.28487	-0.361617	1.28487	down	-1.23881	-0.308955	1.23881	down	0.179221	0.0922064	0.027475	-0.182395	-0.129734	9141	Hs.443831	gb:NM_004708.1 /DB_XREF=gi:4759223 /GEN=PDCD5 /FEA=FLmRNA /CNT=50 /TID=Hs.166468.0 /TIER=FL /STK=0 /UG=Hs.166468 /LL=9141 /DEF=Homo sapiens programmed cell death 5 (PDCD5), mRNA. /PROD=programmed cell death 5 /FL=gb:AF014955.1 gb:NM_004708.1
	239795_at	0.00983637	-1.04079	-0.0576742	1.04079	down	-1.03862	-0.0546632	1.03862	down	-1.11941	-0.162737	1.11941	down	-1.16952	-0.225917	1.16952	down	0.111751	0.0540764	0.0570874	-0.0509868	-0.114167		Hs.673433	gb:AA913885 /DB_XREF=gi:3053277 /DB_XREF=ol35e08.s2 /CLONE=IMAGE:1525478 /FEA=EST /CNT=4 /TID=Hs.190726.0 /TIER=ConsEnd /STK=4 /UG=Hs.190726 /UG_TITLE=ESTs, Weakly similar to ALU1_HUMAN ALU SUBFAMILY J SEQUENCE CONTAMINATION WARNING ENTRY (H.sapiens)
	1566994_at	0.00984989	1.13277	0.179858	1.13277	up	1.22497	0.292747	1.22497	up	1.15118	0.203114	1.15118	up	1.15551	0.20853	1.15551	up	-0.15091	0.0289486	0.141837	0.0522038	0.0576201			gb:AF454553.1 /DB_XREF=gi:18150586 /TID=Hs2.382851.1 /CNT=1 /FEA=mRNA /TIER=ConsEnd /STK=0 /UG=Hs.382851 /UG_TITLE=Homo sapiens clone GCRG114 mRNA sequence /DEF=Homo sapiens clone GCRG114 mRNA sequence.
FKSG52	224284_x_at	0.0098642	-1.01777	-0.0254171	1.01777	down	1.14919	0.200621	1.14919	up	1.08326	0.115377	1.08326	up	-1.06669	-0.0931467	1.06669	down	-0.0238921	-0.0493092	0.176729	0.0914847	-0.117039			gb:AF338193.1 /DB_XREF=gi:12802886 /GEN=FKSG65 /FEA=FLmRNA /CNT=1 /TID=Hs.326591.0 /TIER=FL /STK=0 /UG=Hs.326591 /DEF=Homo sapiens FKSG65 (FKSG65) mRNA, complete cds. /PROD=FKSG65 /FL=gb:AF338193.1
	1560909_x_at	0.0098707	1.04952	0.0697239	1.04952	up	1.01731	0.0247584	1.01731	up	1.01164	0.0166964	1.01164	up	-1.08546	-0.118307	1.08546	down	-0.0145894	0.0551346	0.010169	0.00210705	-0.132896		Hs.621482	gb:N21555 /DB_XREF=gi:1126725 /DB_XREF=yx60b06.s1 /CLONE=IMAGE:266099 /TID=Hs2.206710.1 /CNT=5 /FEA=mRNA /TIER=ConsEnd /STK=2 /UG=Hs.206710 /UG_TITLE=Homo sapiens full length insert cDNA clone YX60B06
SEC24A	244841_at	0.00987074	1.37756	0.462112	1.37756	up	1.43708	0.523138	1.43708	up	1.28611	0.363017	1.28611	up	1.37047	0.454674	1.37047	up	-0.37627	0.0858422	0.146869	-0.0132522	0.0784045	10802	Hs.595540	gb:AI080364 /DB_XREF=gi:3416615 /DB_XREF=ox81a07.s1 /CLONE=IMAGE:1662708 /FEA=EST /CNT=3 /TID=Hs.134218.0 /TIER=ConsEnd /STK=3 /UG=Hs.134218 /UG_TITLE=ESTs
TNFSF8	241819_at	0.00987866	-1.63009	-0.704951	1.63009	down	-1.9065	-0.930924	1.9065	down	-1.64399	-0.717204	1.64399	down	-1.99161	-0.993935	1.99161	down	0.672406	-0.0325454	-0.258519	-0.0447984	-0.321529	944	Hs.494901	gb:AW518486 /DB_XREF=gi:7156568 /DB_XREF=xx96f08.x1 /CLONE=IMAGE:2851527 /FEA=EST /CNT=7 /TID=Hs.177136.0 /TIER=ConsEnd /STK=1 /UG=Hs.177136 /UG_TITLE=ESTs, Highly similar to TNF8_HUMAN CD30 LIGAND (H.sapiens)
IL10RB-AS1	230631_s_at	0.00988209	1.50781	0.592451	1.50781	up	2.23748	1.16187	2.23748	up	1.85282	0.889719	1.85282	up	1.90893	0.932764	1.90893	up	-0.646622	-0.0541714	0.515251	0.243097	0.286142	100288432	Hs.709795	gb:AI202642 /DB_XREF=gi:3755248 /DB_XREF=qs72d12.x1 /CLONE=IMAGE:1943639 /FEA=EST /CNT=15 /TID=Hs.237955.4 /TIER=Stack /STK=14 /UG=Hs.237955 /LL=55402 /UG_GENE=PRO2706 /UG_TITLE=hypothetical protein PRO2706
DHRS3	202481_at	0.00988588	-1.32962	-0.41101	1.32962	down	-1.52064	-0.60468	1.52064	down	-1.40697	-0.49259	1.40697	down	-1.24383	-0.314792	1.24383	down	0.469948	0.0589373	-0.134732	-0.0226426	0.155156	9249	Hs.289347	gb:NM_004753.1 /DB_XREF=gi:4759083 /GEN=SDR1 /FEA=FLmRNA /CNT=134 /TID=Hs.17144.0 /TIER=FL+Stack /STK=62 /UG=Hs.17144 /LL=9249 /DEF=Homo sapiens short-chain dehydrogenasereductase 1 (SDR1), mRNA. /PROD=short-chain dehydrogenasereductase 1 /FL=gb:BC002730.1 gb:AF061741.1 gb:NM_004753.1
GAD2	216651_s_at	0.00988914	1.01366	0.0195669	1.01366	up	1.11121	0.152129	1.11121	up	1.09421	0.129886	1.09421	up	1.17319	0.23044	1.17319	up	-0.0950249	-0.075458	0.057104	0.0348613	0.135415	2572	Hs.231829	gb:X69936.1 /DB_XREF=gi:31757 /GEN=GAD2 /FEA=mRNA /CNT=1 /TID=Hs.170808.2 /TIER=ConsEnd /STK=0 /UG=Hs.170808 /LL=2572 /DEF=H.sapiens mRNA for glutamate decarboxylase. /PROD=glutamate decarboxylase
OSBPL10	216755_at	0.00989293	-1.25311	-0.325513	1.25311	down	1.00246	0.00353853	1.00246	up	-1.02812	-0.040013	1.02812	down	-1.14088	-0.19015	1.14088	down	0.064919	-0.260594	0.0684575	0.024906	-0.125231	114884		gb:AK024945.1 /DB_XREF=gi:10437367 /FEA=mRNA /CNT=1 /TID=Hs.306732.0 /TIER=ConsEnd /STK=0 /UG=Hs.306732 /UG_TITLE=Homo sapiens cDNA: FLJ21292 fis, clone COL01969 /DEF=Homo sapiens cDNA: FLJ21292 fis, clone COL01969.
	1563841_at	0.00989692	1.01894	0.0270664	1.01894	up	1.02209	0.0315204	1.02209	up	1.1163	0.158725	1.1163	up	-1.01058	-0.0151894	1.01058	down	-0.0187898	0.00827657	0.0127306	0.139935	-0.0339792		Hs.684034	gb:AL832549.1 /DB_XREF=gi:21733124 /TID=Hs2.376988.1 /CNT=1 /FEA=mRNA /TIER=ConsEnd /STK=0 /UG=Hs.376988 /UG_TITLE=Homo sapiens mRNA; cDNA DKFZp547I2317 (from clone DKFZp547I2317) /DEF=Homo sapiens mRNA; cDNA DKFZp547I2317 (from clone DKFZp547I2317).
MAP4K1	206296_x_at	0.00991651	-1.22052	-0.287499	1.22052	down	-1.81274	-0.858171	1.81274	down	-1.58919	-0.668294	1.58919	down	-1.29514	-0.373107	1.29514	down	0.274856	-0.0126425	-0.583315	-0.393438	-0.0982507	11184	Hs.95424	gb:NM_007181.1 /DB_XREF=gi:6005809 /GEN=MAP4K1 /FEA=FLmRNA /CNT=22 /TID=Hs.86575.0 /TIER=FL /STK=1 /UG=Hs.86575 /LL=11184 /DEF=Homo sapiens mitogen-activated protein kinase kinase kinase kinase 1 (MAP4K1), mRNA. /PROD=mitogen-activated protein kinase kinase kinasekinase 1 /FL=gb:U66464.1 gb:NM_007181.1
	242053_at	0.00992804	1.03138	0.0445755	1.03138	up	1.02631	0.0374675	1.02631	up	1.07325	0.101991	1.07325	up	1.19459	0.256521	1.19459	up	-0.0628531	-0.0182776	-0.0253855	0.0391383	0.193668		Hs.596071	gb:AW665279 /DB_XREF=gi:7457825 /DB_XREF=hj02b01.x1 /CLONE=IMAGE:2980585 /FEA=EST /CNT=5 /TID=Hs.45192.0 /TIER=ConsEnd /STK=0 /UG=Hs.45192 /UG_TITLE=ESTs
	1561148_at	0.00994083	-1.11198	-0.153136	1.11198	down	1.07653	0.106387	1.07653	up	1.00924	0.0132739	1.00924	up	1.02553	0.0363727	1.02553	up	0.00450966	-0.148626	0.110897	0.0177836	0.0408823		Hs.384579	gb:AF086474.1 /DB_XREF=gi:3483819 /TID=Hs2.384579.1 /CNT=3 /FEA=mRNA /TIER=ConsEnd /STK=1 /UG=Hs.384579 /UG_TITLE=Homo sapiens full length insert cDNA clone ZD88D12 /DEF=Homo sapiens full length insert cDNA clone ZD88D12.
HIPK2	219028_at	0.00995436	1.33947	0.421658	1.33947	up	1.41083	0.496541	1.41083	up	-1.00223	-0.00321829	1.00223	down	1.05848	0.0819887	1.05848	up	-0.243226	0.178432	0.253316	-0.246444	-0.161237	28996	Hs.731417	gb:NM_022740.1 /DB_XREF=gi:13430859 /GEN=HIPK2 /FEA=FLmRNA /CNT=57 /TID=Hs.236131.0 /TIER=FL /STK=7 /UG=Hs.236131 /LL=28996 /DEF=Homo sapiens homeodomain-interacting protein kinase 2 (HIPK2), mRNA. /PROD=homeodomain-interacting protein kinase 2 /FL=gb:NM_022740.1 gb:AF208291.1
ANO9	227393_at	0.00996802	-1.36823	-0.452308	1.36823	down	-1.44437	-0.530445	1.44437	down	-1.26433	-0.338374	1.26433	down	-1.19952	-0.262452	1.19952	down	0.342982	-0.109327	-0.187463	0.0046074	0.0805297	338440	Hs.501622	gb:AW084755 /DB_XREF=gi:6039907 /DB_XREF=xc57d02.x1 /CLONE=IMAGE:2588355 /FEA=mRNA /CNT=36 /TID=Hs.288455.1 /TIER=Stack /STK=28 /UG=Hs.288455 /UG_TITLE=Homo sapiens cDNA: FLJ23270 fis, clone COL10309, highly similar to HSU33271 Human normal keratinocyte mRNA
HSPA2	211538_s_at	0.00998019	1.12445	0.169226	1.12445	up	1.05771	0.0809501	1.05771	up	1.10034	0.137954	1.10034	up	1.29465	0.372559	1.29465	up	-0.092208	0.0770178	-0.0112579	0.045746	0.280351	3306	Hs.432648	gb:U56725.1 /DB_XREF=gi:4204879 /FEA=FLmRNA /CNT=1 /TID=Hs.75452.1 /TIER=FL /STK=0 /UG=Hs.75452 /LL=3306 /UG_GENE=HSPA2 /DEF=Human heat shock protein mRNA, complete cds. /PROD=heat shock protein /FL=gb:U56725.1
ZNF426	233354_at	0.00999916	-1.13828	-0.186851	1.13828	down	1.00432	0.00622152	1.00432	up	-1.08424	-0.116681	1.08424	down	-1.12287	-0.167188	1.12287	down	0.0704853	-0.116366	0.0767068	-0.0461962	-0.0967023	79088	Hs.386476	gb:AK024250.1 /DB_XREF=gi:10436579 /FEA=mRNA /CNT=3 /TID=Hs.43145.0 /TIER=ConsEnd /STK=0 /UG=Hs.43145 /UG_TITLE=Homo sapiens cDNA FLJ14188 fis, clone NT2RP2005980 /DEF=Homo sapiens cDNA FLJ14188 fis, clone NT2RP2005980.
MBP	210136_at	0.0100057	-1.56548	-0.646609	1.56548	down	-1.35299	-0.436149	1.35299	down	-1.11404	-0.155804	1.11404	down	-1.48596	-0.571399	1.48596	down	0.30895	-0.337659	-0.127199	0.153146	-0.262448	4155	Hs.551713	gb:AW070431 /DB_XREF=gi:6025429 /DB_XREF=xa11b04.x1 /CLONE=IMAGE:2567983 /FEA=FLmRNA /CNT=21 /TID=Hs.69547.4 /TIER=Stack /STK=11 /UG=Hs.69547 /LL=4155 /UG_GENE=MBP /UG_TITLE=myelin basic protein /FL=gb:L18865.1
CYB5RL	229605_at	0.0100103	-1.09587	-0.132072	1.09587	down	-1.19722	-0.259688	1.19722	down	-1.1353	-0.183068	1.1353	down	-1.15771	-0.211278	1.15771	down	0.188604	0.0565321	-0.0710846	0.00553524	-0.0226747	606495	Hs.591426	gb:AI150848 /DB_XREF=gi:3679317 /DB_XREF=qb68e10.x1 /CLONE=IMAGE:1705290 /FEA=EST /CNT=18 /TID=Hs.268591.0 /TIER=Stack /STK=9 /UG=Hs.268591 /UG_TITLE=ESTs, Weakly similar to ALU7_HUMAN ALU SUBFAMILY SQ SEQUENCE CONTAMINATION WARNING ENTRY (H.sapiens)
	224546_at	0.0100203	1.00947	0.0136028	1.00947	up	1.08093	0.112275	1.08093	up	1.02086	0.0297903	1.02086	up	-1.0676	-0.0943687	1.0676	down	0.0228863	0.0364891	0.135161	0.0526766	-0.0714823			gb:AF257098.1 /DB_XREF=gi:7673698 /GEN=OVN9-3 /FEA=FLmRNA /CNT=1 /TID=Hs.283076.0 /TIER=FL /STK=0 /UG=Hs.283076 /DEF=Homo sapiens ovarian cancer related protein OVN9-3 (OVN9-3) mRNA, complete cds. /PROD=ovarian cancer related protein OVN9-3 /FL=gb:AF257098.1
TRA2A	229574_at	0.0100559	-1.25942	-0.332754	1.25942	down	-1.32853	-0.409833	1.32853	down	-1.24295	-0.313771	1.24295	down	-1.39151	-0.476654	1.39151	down	0.323837	-0.00891696	-0.0859959	0.0100663	-0.152817	29896		gb:AI268231 /DB_XREF=gi:3887398 /DB_XREF=qm02h09.x1 /CLONE=IMAGE:1880705 /FEA=EST /CNT=20 /TID=Hs.130829.0 /TIER=Stack /STK=16 /UG=Hs.130829 /UG_TITLE=ESTs
	240443_at	0.0100771	1.16716	0.223007	1.16716	up	1.0507	0.0713441	1.0507	up	1.13553	0.183366	1.13553	up	1.19175	0.253077	1.19175	up	-0.148748	0.0742592	-0.0774037	0.0346184	0.104329		Hs.484309	gb:AA934493 /DB_XREF=gi:3091650 /DB_XREF=oo50c03.s1 /CLONE=IMAGE:1569604 /FEA=EST /CNT=6 /TID=Hs.127765.0 /TIER=ConsEnd /STK=4 /UG=Hs.127765 /UG_TITLE=ESTs
ALCAM	1569362_at	0.0100798	1.34501	0.427612	1.34501	up	1.3082	0.38758	1.3082	up	1.20583	0.270021	1.20583	up	1.14532	0.195751	1.14532	up	-0.148678	0.278934	0.238901	0.121343	0.0470724	214	Hs.591293	gb:BC041127.1 /DB_XREF=gi:26996821 /TID=Hs2.435844.1 /CNT=5 /FEA=mRNA /TIER=ConsEnd /STK=0 /UG=Hs.435844 /UG_TITLE=Homo sapiens, Similar to activated leukocyte cell adhesion molecule, clone IMAGE:5730490, mRNA /DEF=Homo sapiens, Similar to activated leukocyte cell adhesion molecule, clone IMAGE:5730490, mRNA.
FLJ41455	244395_at	0.0100823	1.1417	0.19118	1.1417	up	1.17898	0.23754	1.17898	up	1.05506	0.0773266	1.05506	up	1.03646	0.0516599	1.03646	up	-0.0397123	0.151467	0.197827	0.0376143	0.0119476	441441	Hs.494023	gb:AA018404 /DB_XREF=gi:1481678 /DB_XREF=ze41g09.r1 /CLONE=IMAGE:361600 /FEA=EST /CNT=6 /TID=Hs.61126.0 /TIER=ConsEnd /STK=0 /UG=Hs.61126 /UG_TITLE=ESTs
ACRV1	207990_x_at	0.0100927	1.07423	0.103301	1.07423	up	1.12394	0.16856	1.12394	up	1.14201	0.19158	1.14201	up	1.07102	0.098986	1.07102	up	-0.0980828	0.00521782	0.0704777	0.0934969	0.000903225	56	Hs.169222	gb:NM_020114.1 /DB_XREF=gi:9955942 /GEN=ACRV1 /FEA=FLmRNA /CNT=1 /TID=Hs.169222.5 /TIER=FL /STK=0 /UG=Hs.169222 /LL=56 /DEF=Homo sapiens acrosomal vesicle protein 1 (ACRV1), transcript variant 9, mRNA. /PROD=acrosomal vesicle protein 1, isoform iprecursor /FL=gb:NM_020114.1
B3GNT7	1555963_x_at	0.0101003	-1.06788	-0.0947552	1.06788	down	-1.05712	-0.0801438	1.05712	down	-1.10999	-0.150543	1.10999	down	-1.1927	-0.254233	1.1927	down	0.135681	0.0409253	0.0555367	-0.0148624	-0.118552	93010	Hs.299329	gb:CA503291 /DB_XREF=gi:24994245 /DB_XREF=UI-CF-FN0-afq-e-12-0-UI.s1 /CLONE=UI-CF-FN0-afq-e-12-0-UI /TID=Hs2.299329.2 /CNT=13 /FEA=mRNA /TIER=Stack /STK=9 /LL=93010 /UG_GENE=B3GNT7 /UG=Hs.299329 /UG_TITLE=UDP-GlcNAc:betaGal beta-1,3-N-acetylglucosaminyltransferase 7
SMAD4	235725_at	0.0101445	-1.09606	-0.132331	1.09606	down	-1.20326	-0.266945	1.20326	down	-1.1555	-0.208512	1.1555	down	-1.26452	-0.338595	1.26452	down	0.224741	0.0924101	-0.0422042	0.0162295	-0.113854	4089	Hs.75862	gb:AW055351 /DB_XREF=gi:5921054 /DB_XREF=wz18f12.x1 /CLONE=IMAGE:2558447 /FEA=EST /CNT=10 /TID=Hs.50438.0 /TIER=ConsEnd /STK=7 /UG=Hs.50438 /UG_TITLE=ESTs
PCOLCE2	219295_s_at	0.0101614	4.02656	2.00955	4.02656	up	3.83511	1.93927	3.83511	up	3.65896	1.87143	3.65896	up	2.92285	1.54738	2.92285	up	-0.804722	1.20483	1.13455	1.06671	0.742654	26577	Hs.8944	gb:NM_013363.1 /DB_XREF=gi:7019482 /GEN=PCOLCE2 /FEA=FLmRNA /CNT=59 /TID=Hs.8944.0 /TIER=FL /STK=0 /UG=Hs.8944 /LL=26577 /DEF=Homo sapiens procollagen C-endopeptidase enhancer 2 (PCOLCE2), mRNA. /PROD=procollagen C-endopeptidase enhancer 2 /FL=gb:NM_013363.1 gb:AF098269.1
GPR173	1556039_s_at	0.0101673	1.06302	0.0881746	1.06302	up	1.05198	0.0731063	1.05198	up	1.12433	0.169061	1.12433	up	1.05681	0.0797112	1.05681	up	-0.0555186	0.032656	0.0175877	0.113542	0.0241926	54328	Hs.193011	gb:AW150212 /DB_XREF=gi:6198108 /DB_XREF=xg49b05.x1 /CLONE=IMAGE:2630865 /TID=Hs2.193011.1 /CNT=10 /FEA=mRNA /TIER=Stack /STK=8 /UG=Hs.193011 /UG_TITLE=Homo sapiens, clone IMAGE:4151570, mRNA
PDCD4-AS1	222307_at	0.0101872	-1.38601	-0.47094	1.38601	down	-1.46505	-0.550952	1.46505	down	-1.16251	-0.217242	1.16251	down	-1.18486	-0.244721	1.18486	down	0.321075	-0.149864	-0.229876	0.103834	0.0763542	282997	Hs.599931	gb:AI695595 /DB_XREF=gi:4983495 /DB_XREF=we49g06.x1 /CLONE=IMAGE:2344474 /FEA=EST /CNT=8 /TID=Hs.293219.0 /TIER=ConsEnd /STK=0 /UG=Hs.293219 /UG_TITLE=ESTs
RAD23B	201222_s_at	0.0102031	1.48111	0.566678	1.48111	up	1.77442	0.82735	1.77442	up	2.04062	1.029	2.04062	up	2.30735	1.20624	2.30735	up	-1.0676	-0.500927	-0.240254	-0.0385993	0.138634	5887	Hs.521640	gb:AL527365 /DB_XREF=gi:12790858 /DB_XREF=AL527365 /CLONE=CS0DC021YG08 (5 prime) /FEA=FLmRNA /CNT=276 /TID=Hs.178658.0 /TIER=Stack /STK=14 /UG=Hs.178658 /LL=5887 /UG_GENE=RAD23B /UG_TITLE=RAD23 (S. cerevisiae) homolog B /FL=gb:D21090.1 gb:NM_002874.1
SULT2A1	206293_at	0.0102722	-1.00216	-0.00311221	1.00216	down	1.05376	0.0755499	1.05376	up	-1.01158	-0.0166075	1.01158	down	1.0456	0.0643249	1.0456	up	-0.0212059	-0.0243181	0.0543441	-0.0378134	0.043119	6822	Hs.515835	gb:U08024.1 /DB_XREF=gi:468250 /GEN=STD /FEA=FLmRNA /CNT=38 /TID=Hs.81884.0 /TIER=FL /STK=1 /UG=Hs.81884 /LL=6822 /DEF=Human clone A dehydroepiandrosterone sulfotransferase (STD) mRNA, complete cds. /PROD=dehydroepiandrosterone sulfotransferase /FL=gb:L20000.1 gb:NM_003167.1 gb:U08025.1 gb:U08024.1
SCN11A	210853_at	0.0104007	1.06891	0.096145	1.06891	up	1.22765	0.2959	1.22765	up	1.10129	0.139192	1.10129	up	1.00947	0.0135967	1.00947	up	-0.0877858	0.00835922	0.208114	0.0514066	-0.0741891	11280	Hs.591657	gb:AF150882.1 /DB_XREF=gi:6693704 /GEN=SCN12A /FEA=FLmRNA /CNT=2 /TID=Hs.186877.1 /TIER=FL /STK=0 /UG=Hs.186877 /LL=10027 /DEF=Homo sapiens voltage-gated sodium channel alpha subunit, alternate splice variant SCN12A-s (SCN12A) mRNA, complete cds. /PROD=voltage-gated sodium channel alpha subunit,alternate splice variant SCN12A-s /FL=gb:AF150882.1
VAMP3	211749_s_at	0.0104235	1.45144	0.537482	1.45144	up	1.42396	0.509907	1.42396	up	1.26038	0.333856	1.26038	up	1.18015	0.238969	1.18015	up	-0.31924	0.218242	0.190667	0.0146157	-0.0802705	9341	Hs.66708	gb:BC005941.1 /DB_XREF=gi:13543573 /FEA=FLmRNA /CNT=1 /TID=HsAffx.900781.986 /TIER=FL /STK=0 /DEF=Homo sapiens, Similar to vesicle-associated membrane protein 3, clone MGC:14563, mRNA, complete cds. /PROD=Similar to vesicle-associated membrane protein3 /FL=gb:BC005941.1
OSCAR	1554503_a_at	0.0104248	1.5298	0.613344	1.5298	up	1.98505	0.989179	1.98505	up	1.48536	0.570815	1.48536	up	1.39363	0.478849	1.39363	up	-0.614044	-0.000700103	0.375135	-0.0432285	-0.135195	126014	Hs.347655	gb:BC035023.1 /DB_XREF=gi:23273931 /TID=Hs2.347655.3 /CNT=12 /FEA=FLmRNA /TIER=FL /STK=1 /LL=126014 /UG_GENE=OSCAR /UG=Hs.347655 /DEF=Homo sapiens, Similar to osteoclast-associated receptor, clone MGC:33613 IMAGE:4825982, mRNA, complete cds. /PROD=Similar to osteoclast-associated receptor /FL=gb:BC035023.1
NLRC4	1552553_a_at	0.010425	1.52906	0.612647	1.52906	up	2.17534	1.12124	2.17534	up	1.70259	0.76773	1.70259	up	1.45685	0.542851	1.45685	up	-0.60013	0.0125173	0.521111	0.1676	-0.0572785	58484	Hs.574741	gb:NM_021209.2 /DB_XREF=gi:20127597 /GEN=CARD12 /TID=Hs2.23248.1 /CNT=8 /FEA=FLmRNA /TIER=FL /STK=3 /LL=58484 /UG=Hs.23248 /DEF=Homo sapiens caspase recruitment domain family, member 12 (CARD12), mRNA. /PROD=caspase recruitment domain protein 12 /FL=gb:AY027790.1 gb:NM_021209.2 gb:AY027789.1 gb:AY035391.1 gb:AY027787.1
C12orf80	1560276_at	0.010437	1.0308	0.0437612	1.0308	up	1.09259	0.127748	1.09259	up	1.1142	0.156002	1.1142	up	1.07367	0.102547	1.07367	up	-0.0866706	-0.0429094	0.0410776	0.0693312	0.0158766	283403	Hs.667179	gb:BC038743.1 /DB_XREF=gi:24270838 /TID=Hs2.142880.1 /CNT=4 /FEA=mRNA /TIER=ConsEnd /STK=0 /LL=283403 /UG_GENE=LOC283403 /UG=Hs.142880 /UG_TITLE=hypothetical protein LOC283403 /DEF=Homo sapiens, clone IMAGE:5268545, mRNA.
IFT20	210312_s_at	0.0104763	1.2265	0.294542	1.2265	up	1.33267	0.41432	1.33267	up	1.19267	0.25419	1.19267	up	1.09878	0.135901	1.09878	up	-0.164372	0.13017	0.249947	0.0898177	-0.0284709	90410	Hs.705431///Hs.744876	gb:BC002640.1 /DB_XREF=gi:12803610 /FEA=FLmRNA /CNT=10 /TID=Hs.4187.0 /TIER=FL /STK=0 /UG=Hs.4187 /LL=55977 /UG_GENE=LOC55977 /DEF=Homo sapiens, Similar to uterine protein, clone MGC:4279, mRNA, complete cds. /PROD=Similar to uterine protein /FL=gb:BC002640.1
FAM161B	235378_at	0.0104943	-1.0789	-0.109567	1.0789	down	-1.09105	-0.125715	1.09105	down	-1.14158	-0.191031	1.14158	down	-1.15947	-0.213468	1.15947	down	0.146102	0.0365348	0.0203865	-0.0449296	-0.0673665	145483	Hs.550547	gb:AI082216 /DB_XREF=gi:3419008 /DB_XREF=ox75h11.x1 /CLONE=IMAGE:1662213 /FEA=EST /CNT=13 /TID=Hs.135260.0 /TIER=ConsEnd /STK=1 /UG=Hs.135260 /UG_TITLE=ESTs
CDIP1	218183_at	0.0105047	-1.19834	-0.261031	1.19834	down	-1.25045	-0.322445	1.25045	down	-1.23479	-0.304262	1.23479	down	-1.22647	-0.294507	1.22647	down	0.223395	-0.0376369	-0.0990509	-0.080867	-0.0711128	29965	Hs.654653	gb:NM_013399.1 /DB_XREF=gi:7019336 /GEN=C16orf5 /FEA=FLmRNA /CNT=150 /TID=Hs.7765.0 /TIER=FL+Stack /STK=23 /UG=Hs.7765 /LL=29965 /DEF=Homo sapiens chromosome 16 open reading frame 5 (C16orf5), mRNA. /PROD=chromosome 16 open reading frame 5 /FL=gb:NM_013399.1 gb:BC002882.1 gb:AF131218.1 gb:AL136698.1
RITA1	44065_at	0.0105136	-1.14765	-0.198684	1.14765	down	-1.30933	-0.388832	1.30933	down	-1.16727	-0.223135	1.16727	down	1.05885	0.0824936	1.05885	up	0.229173	0.0304898	-0.159659	0.00603805	0.311667	84934	Hs.524762	Cluster Incl. AI937468:wp77e05.x1 Homo sapiens cDNA, 3 end /clone=IMAGE-2467808 /clone_end=3' /gb=AI937468 /gi=5676338 /ug=Hs.235849 /len=516
TMEM218	235654_at	0.0105144	-1.28631	-0.363239	1.28631	down	-1.13106	-0.17768	1.13106	down	-1.20492	-0.268937	1.20492	down	-1.23223	-0.301269	1.23223	down	0.231129	-0.13211	0.0534489	-0.0378083	-0.0701399	219854	Hs.7626	gb:BE673711 /DB_XREF=gi:10034252 /DB_XREF=7d79g09.x1 /CLONE=IMAGE:3279232 /FEA=EST /CNT=8 /TID=Hs.135239.0 /TIER=ConsEnd /STK=7 /UG=Hs.135239 /UG_TITLE=ESTs
LARGE-AS1	1563039_at	0.0105267	1.01696	0.0242592	1.01696	up	1.05463	0.0767327	1.05463	up	1.06778	0.0946168	1.06778	up	1.00787	0.0113083	1.00787	up	-0.0430112	-0.018752	0.0337215	0.0516056	-0.0317029	100506195	Hs.658872	gb:BC035866.1 /DB_XREF=gi:23272792 /TID=Hs2.160255.1 /CNT=2 /FEA=mRNA /TIER=ConsEnd /STK=0 /UG=Hs.160255 /UG_TITLE=Homo sapiens, clone IMAGE:5170410, mRNA /DEF=Homo sapiens, clone IMAGE:5170410, mRNA.
ZNF331	219228_at	0.0105637	-1.4128	-0.498555	1.4128	down	-1.57425	-0.65466	1.57425	down	-1.73146	-0.79199	1.73146	down	-1.48854	-0.573894	1.48854	down	0.396802	-0.101752	-0.257858	-0.395188	-0.177092	55422	Hs.185674	gb:NM_018555.2 /DB_XREF=gi:10092612 /GEN=ZNF361 /FEA=FLmRNA /CNT=45 /TID=Hs.147644.0 /TIER=FL /STK=4 /UG=Hs.147644 /LL=55422 /DEF=Homo sapiens C2H2-like zinc finger protein (ZNF361), mRNA. /PROD=C2H2-like zinc finger protein /FL=gb:NM_018555.2 gb:AF272148.1 gb:AF251515.2
LPCAT2	239598_s_at	0.0105686	2.32395	1.21658	2.32395	up	2.35959	1.23853	2.35959	up	1.98563	0.989595	1.98563	up	1.666	0.736387	1.666	up	-0.912519	0.304058	0.326014	0.0770759	-0.176132	54947	Hs.460857	gb:AA789296 /DB_XREF=gi:2849416 /DB_XREF=aj28d09.s1 /CLONE=1391633 /FEA=EST /CNT=4 /TID=Hs.122398.0 /TIER=ConsEnd /STK=4 /UG=Hs.122398 /UG_TITLE=ESTs, Highly similar to unnamed protein product (H.sapiens)
EGFL8///PPT2///PPT2-EGFL8	209826_at	0.0105767	-1.1865	-0.246716	1.1865	down	-1.16244	-0.217156	1.16244	down	-1.17083	-0.227531	1.17083	down	-1.07245	-0.100915	1.07245	down	0.197985	-0.0487309	-0.0191717	-0.029546	0.0970693	9374///80864///100532746	Hs.731888	gb:AF020544.1 /DB_XREF=gi:2501962 /GEN=PPT2 /FEA=FLmRNA /CNT=53 /TID=Hs.81737.2 /TIER=FL+Stack /STK=35 /UG=Hs.81737 /LL=9374 /DEF=Homo sapiens inactive palmitoyl-protein thioesterase-2i (PPT2) mRNA, complete cds. /PROD=inactive palmitoyl-protein thioesterase-2i /FL=gb:AF020544.1
CCDC142	239922_at	0.0106141	-1.11544	-0.157609	1.11544	down	-1.15509	-0.20801	1.15509	down	-1.19704	-0.259472	1.19704	down	-1.22215	-0.28942	1.22215	down	0.174134	0.0165242	-0.0338766	-0.0853384	-0.115287	84865	Hs.430199	gb:AW157651 /DB_XREF=gi:6229052 /DB_XREF=au85e02.x1 /CLONE=IMAGE:2783066 /FEA=EST /CNT=5 /TID=Hs.270981.0 /TIER=ConsEnd /STK=4 /UG=Hs.270981 /UG_TITLE=ESTs, Weakly similar to ALU2_HUMAN ALU SUBFAMILY SB SEQUENCE CONTAMINATION WARNING ENTRY (H.sapiens)
NANOS1	228523_at	0.0106387	1.09205	0.127034	1.09205	up	-1.00354	-0.00509388	1.00354	down	1.05777	0.0810252	1.05777	up	1.05664	0.0794835	1.05664	up	-0.0320392	0.0949948	-0.0371331	0.048986	0.0474443	340719	Hs.591918	gb:AW970089 /DB_XREF=gi:8159934 /DB_XREF=EST382170 /FEA=EST /CNT=36 /TID=Hs.284136.6 /TIER=ConsEnd /STK=0 /UG=Hs.284136 /LL=29029 /UG_GENE=PRO2047 /UG_TITLE=PRO2047 protein
	1561310_at	0.0106802	-1.00837	-0.0120223	1.00837	down	1.107	0.146652	1.107	up	1.12541	0.17045	1.12541	up	1.01228	0.0176051	1.01228	up	-0.0769803	-0.0890026	0.0696721	0.0934695	-0.0593752		Hs.742344	gb:BC041353.1 /DB_XREF=gi:27370602 /TID=Hs2.434461.1 /CNT=2 /FEA=mRNA /TIER=ConsEnd /STK=1 /UG=Hs.434461 /UG_TITLE=Homo sapiens, clone IMAGE:5272850, mRNA /DEF=Homo sapiens, clone IMAGE:5272850, mRNA.
	241269_at	0.0106836	1.13184	0.178668	1.13184	up	1.15552	0.208543	1.15552	up	1.11701	0.159642	1.11701	up	1.0866	0.119819	1.0866	up	-0.12345	0.0552183	0.0850938	0.0361926	-0.00363059		Hs.710344	gb:AI732702 /DB_XREF=gi:5053815 /DB_XREF=zw24d10.x5 /CLONE=IMAGE:770227 /FEA=EST /CNT=4 /TID=Hs.97997.0 /TIER=ConsEnd /STK=4 /UG=Hs.97997 /UG_TITLE=ESTs
PCDHB4	240317_at	0.0107062	1.10415	0.142934	1.10415	up	1.14874	0.200047	1.14874	up	1.13204	0.178924	1.13204	up	1.17881	0.237328	1.17881	up	-0.0953937	0.0475399	0.104653	0.0835299	0.141934	56131	Hs.591250	gb:BE222389 /DB_XREF=gi:8909707 /DB_XREF=hu11h04.x1 /CLONE=IMAGE:3166327 /FEA=EST /CNT=7 /TID=Hs.135092.0 /TIER=ConsEnd /STK=0 /UG=Hs.135092 /UG_TITLE=ESTs
TPGS2	244233_at	0.0107126	1.00872	0.0125244	1.00872	up	-1.01754	-0.0250849	1.01754	down	-1.01839	-0.0262897	1.01839	down	-1.11041	-0.151092	1.11041	down	0.0360283	0.0485527	0.0109434	0.00973859	-0.115064	25941		gb:AI470549 /DB_XREF=gi:4332639 /DB_XREF=ti90h08.x1 /CLONE=IMAGE:2139327 /FEA=EST /CNT=3 /TID=Hs.162201.0 /TIER=ConsEnd /STK=3 /UG=Hs.162201 /UG_TITLE=ESTs
ABHD12B	237974_at	0.010734	1.00908	0.0130411	1.00908	up	1.10542	0.144599	1.10542	up	1.10837	0.148443	1.10837	up	1.08234	0.114155	1.08234	up	-0.0800266	-0.0669855	0.0645721	0.0684164	0.0341281	145447	Hs.271896	gb:BE502594 /DB_XREF=gi:9704924 /DB_XREF=hz18c08.x1 /CLONE=IMAGE:3208334 /FEA=EST /CNT=6 /TID=Hs.196582.0 /TIER=ConsEnd /STK=6 /UG=Hs.196582 /UG_TITLE=ESTs
LINC01426	232804_at	0.0107352	1.03155	0.0448209	1.03155	up	1.11043	0.151113	1.11043	up	1.07308	0.101755	1.07308	up	-1.01104	-0.0158361	1.01104	down	-0.0194205	0.0254004	0.131692	0.0823347	-0.0352566	100506385	Hs.120179	gb:AK025786.1 /DB_XREF=gi:10438406 /FEA=mRNA /CNT=7 /TID=Hs.120179.0 /TIER=ConsEnd /STK=0 /UG=Hs.120179 /UG_TITLE=Homo sapiens cDNA: FLJ22133 fis, clone HEP20529 /DEF=Homo sapiens cDNA: FLJ22133 fis, clone HEP20529.
HDGFRP3	216693_x_at	0.0107523	1.58153	0.661322	1.58153	up	1.11571	0.157967	1.11571	up	1.02263	0.0322855	1.02263	up	1.2227	0.290073	1.2227	up	-0.0923456	0.568976	0.0656218	-0.0600601	0.197727	50810	Hs.513954	gb:AL133102.1 /DB_XREF=gi:6453585 /FEA=mRNA /CNT=1 /TID=Hs.127842.2 /TIER=ConsEnd /STK=0 /UG=Hs.127842 /LL=50810 /UG_GENE=CGI-142 /UG_TITLE=CGI-142 /DEF=Homo sapiens mRNA; cDNA DKFZp434C1722 (from clone DKFZp434C1722).
FAM159A	1555379_at	0.0107622	-1.11293	-0.154368	1.11293	down	-1.12925	-0.175368	1.12925	down	-1.15897	-0.212838	1.15897	down	-1.13919	-0.188013	1.13919	down	0.176456	0.0220885	0.0010876	-0.0363823	-0.0115574	348378		gb:BC041608.1 /DB_XREF=gi:27371177 /TID=Hs2.434419.1 /CNT=1 /FEA=FLmRNA /TIER=FL /STK=1 /UG=Hs.434419 /DEF=Homo sapiens, Similar to RIKEN cDNA A930021C24 gene, clone MGC:52498 IMAGE:5484285, mRNA, complete cds. /PROD=Similar to RIKEN cDNA A930021C24 gene /FL=gb:BC041608.1
HGD	214307_at	0.0107893	-1.17522	-0.232933	1.17522	down	-1.15324	-0.205687	1.15324	down	-1.08707	-0.120441	1.08707	down	-1.07193	-0.100204	1.07193	down	0.141961	-0.0909722	-0.0637262	0.02152	0.0417568	3081		gb:AI478172 /DB_XREF=gi:4371398 /DB_XREF=tm50a05.x1 /CLONE=IMAGE:2161520 /FEA=EST /CNT=13 /TID=Hs.15113.1 /TIER=Stack /STK=9 /UG=Hs.15113 /LL=3081 /UG_GENE=HGD /UG_TITLE=homogentisate 1,2-dioxygenase (homogentisate oxidase)
NEDD4	213012_at	0.0107951	2.07639	1.05408	2.07639	up	2.54948	1.3502	2.54948	up	1.96018	0.970987	1.96018	up	1.75083	0.808037	1.75083	up	-0.694356	0.359724	0.655848	0.276631	0.113682	4734	Hs.1565	gb:D42055.1 /DB_XREF=gi:577312 /GEN=KIAA0093 /FEA=mRNA /CNT=93 /TID=Hs.1565.0 /TIER=Stack /STK=29 /UG=Hs.1565 /LL=4734 /UG_TITLE=neural precursor cell expressed, developmentally down-regulated 4 /DEF=Human mRNA for KIAA0093 gene, partial cds.
	242729_at	0.0108011	1.19602	0.258239	1.19602	up	1.65312	0.72519	1.65312	up	1.3527	0.435847	1.3527	up	1.20363	0.26739	1.20363	up	-0.197604	0.0606356	0.527586	0.238243	0.069786			gb:BE551384 /DB_XREF=gi:9793076 /DB_XREF=7b64a09.x1 /CLONE=IMAGE:3232984 /FEA=EST /CNT=4 /TID=Hs.166999.0 /TIER=ConsEnd /STK=3 /UG=Hs.166999 /UG_TITLE=ESTs, Moderately similar to I38344 titin, cardiac muscle (H.sapiens)
GBP5	238581_at	0.0108113	3.10072	1.6326	3.10072	up	-1.27313	-0.348384	1.27313	down	1.49194	0.577191	1.49194	up	1.56381	0.645067	1.56381	up	-0.00298262	1.62962	-0.351366	0.574208	0.642084	115362	Hs.513726	gb:BG271923 /DB_XREF=gi:12980554 /DB_XREF=nai60d01.x1 /CLONE=IMAGE:4264369 /FEA=EST /CNT=10 /TID=Hs.211535.0 /TIER=ConsEnd /STK=1 /UG=Hs.211535 /UG_TITLE=ESTs
C11orf58	1555365_x_at	0.0108154	-1.03844	-0.0544201	1.03844	down	1.04487	0.0633167	1.04487	up	-1.03762	-0.0532797	1.03762	down	-1.02356	-0.0336021	1.02356	down	-0.00278531	-0.0572054	0.0605314	-0.0560651	-0.0363874	10944	Hs.645792	gb:AL136602.1 /DB_XREF=gi:19584267 /TID=Hs2.356897.1 /CNT=1 /FEA=FLmRNA /TIER=FL /STK=1 /UG=Hs.356897 /UG_TITLE=Homo sapiens mRNA; cDNA DKFZp564K2216 (from clone DKFZp564K2216); complete cds /DEF=Homo sapiens mRNA; cDNA DKFZp564K2216 (from clone DKFZp564K2216); complete cds. /FL=gb:AL136602.1
LOC283045	1563854_s_at	0.0108681	1.03051	0.0433635	1.03051	up	1.02866	0.0407693	1.02866	up	1.11682	0.159399	1.11682	up	-1.01468	-0.0210292	1.01468	down	-0.0483244	-0.00496086	-0.00755511	0.111075	-0.0693536	283045		gb:AK095019.1 /DB_XREF=gi:21754201 /TID=Hs2.437123.1 /CNT=1 /FEA=mRNA /TIER=ConsEnd /STK=0 /LL=283045 /UG_GENE=LOC283045 /UG=Hs.437123 /UG_TITLE=hypothetical protein LOC283045 /DEF=Homo sapiens cDNA FLJ37700 fis, clone BRHIP2016968.
RGS22	223691_at	0.0109374	1.1263	0.171598	1.1263	up	1.03648	0.0516972	1.03648	up	1.07523	0.10464	1.07523	up	1.14259	0.192304	1.14259	up	-0.1206	0.0509973	-0.0689031	-0.0159604	0.0717041	26166	Hs.120021	gb:AY009106.1 /DB_XREF=gi:12330994 /FEA=FLmRNA /CNT=29 /TID=Hs.120021.0 /TIER=FL+Stack /STK=10 /UG=Hs.120021 /LL=26166 /UG_GENE=DKFZP434I092 /DEF=Homo sapiens PRTD-NY2 mRNA, complete cds. /PROD=PRTD-NY2 /FL=gb:AY009106.1
SLC35C1	222647_at	0.0109436	-1.11992	-0.163393	1.11992	down	-1.18645	-0.246646	1.18645	down	-1.20661	-0.270961	1.20661	down	-1.14823	-0.199418	1.14823	down	0.170255	0.00686195	-0.0763911	-0.100706	-0.0291628	55343	Hs.12211	gb:BC001427.1 /DB_XREF=gi:12655144 /FEA=FLmRNA /CNT=87 /TID=Hs.12211.0 /TIER=FL /STK=0 /UG=Hs.12211 /LL=55343 /UG_GENE=FLJ11320 /DEF=Homo sapiens, hypothetical protein FLJ11320, clone MGC:894, mRNA, complete cds. /PROD=hypothetical protein FLJ11320 /FL=gb:BC001427.1 gb:NM_018389.1
C19orf43	230213_at	0.0109485	-1.15524	-0.20819	1.15524	down	-1.1601	-0.214248	1.1601	down	-1.25543	-0.328185	1.25543	down	-1.35033	-0.433315	1.35033	down	0.194354	-0.0138357	-0.0198938	-0.133831	-0.238961	79002	Hs.515155	gb:BE220399 /DB_XREF=gi:8907717 /DB_XREF=hv71g09.x1 /CLONE=IMAGE:3178912 /FEA=EST /CNT=11 /TID=Hs.323836.0 /TIER=Stack /STK=8 /UG=Hs.323836 /UG_TITLE=ESTs, Weakly similar to alternatively spliced product using exon 13A (H.sapiens)
SYNC	221276_s_at	0.0110069	-1.01073	-0.0153927	1.01073	down	1.13687	0.185069	1.13687	up	1.12336	0.167824	1.12336	up	1.27678	0.352507	1.27678	up	-0.0936896	-0.109082	0.0913798	0.0741346	0.258818	81493	Hs.712631	gb:NM_030786.1 /DB_XREF=gi:13540560 /GEN=SYNCOILIN /FEA=FLmRNA /CNT=1 /TID=HsAffx.900059.68 /TIER=FL /STK=0 /DEF=Homo sapiens intermediate filament protein syncoilin (SYNCOILIN), mRNA. /PROD=intermediate filament protein syncoilin /FL=gb:NM_030786.1
TNPO1	207657_x_at	0.0110253	1.12765	0.173322	1.12765	up	1.2564	0.329292	1.2564	up	1.23106	0.299901	1.23106	up	1.30508	0.384136	1.30508	up	-0.311445	-0.138123	0.0178476	-0.0115434	0.0726917	3842	Hs.482497	gb:NM_002270.1 /DB_XREF=gi:4504906 /GEN=KPNB2 /FEA=FLmRNA /CNT=3 /TID=Hs.168075.0 /TIER=FL /STK=0 /UG=Hs.168075 /LL=3842 /DEF=Homo sapiens karyopherin (importin) beta 2 (KPNB2), mRNA. /PROD=karyopherin (importin) beta 2 /FL=gb:NM_002270.1 gb:U70322.1
IL6ST	204864_s_at	0.0110271	1.15069	0.202505	1.15069	up	1.43276	0.518793	1.43276	up	1.33062	0.412095	1.33062	up	1.73543	0.795291	1.73543	up	-0.377038	-0.174533	0.141755	0.0350573	0.418253	3572	Hs.532082	gb:NM_002184.1 /DB_XREF=gi:4504674 /GEN=IL6ST /FEA=FLmRNA /CNT=66 /TID=Hs.82065.0 /TIER=FL /STK=0 /UG=Hs.82065 /LL=3572 /DEF=Homo sapiens interleukin 6 signal transducer (gp130, oncostatin M receptor) (IL6ST), mRNA. /PROD=interleukin 6 signal transducer (gp130,oncostatin M receptor) /FL=gb:NM_002184.1 gb:M57230.1
MORC2	228449_at	0.0110462	-1.28257	-0.359042	1.28257	down	-1.30297	-0.381809	1.30297	down	-1.20876	-0.273531	1.20876	down	-1.20472	-0.268699	1.20472	down	0.257023	-0.102019	-0.124786	-0.0165084	-0.0116761	22880		gb:BG260069 /DB_XREF=gi:12769885 /DB_XREF=602371655F1 /CLONE=IMAGE:4479924 /FEA=EST /CNT=19 /TID=Hs.120446.0 /TIER=Stack /STK=15 /UG=Hs.120446 /UG_TITLE=ESTs
SCD5	220232_at	0.01105	1.07483	0.104108	1.07483	up	1.63892	0.712743	1.63892	up	1.19101	0.252184	1.19101	up	-1.12014	-0.163676	1.12014	down	0.0573723	0.16148	0.770115	0.309556	-0.106304	79966	Hs.379191	gb:NM_024906.1 /DB_XREF=gi:13376362 /GEN=FLJ21032 /FEA=FLmRNA /CNT=9 /TID=Hs.247474.0 /TIER=FL /STK=0 /UG=Hs.247474 /LL=79966 /DEF=Homo sapiens hypothetical protein FLJ21032 (FLJ21032), mRNA. /PROD=hypothetical protein FLJ21032 /FL=gb:NM_024906.1
	242737_at	0.0110569	1.06441	0.0900538	1.06441	up	1.26973	0.344521	1.26973	up	1.07467	0.103898	1.07467	up	-1.02275	-0.0324592	1.02275	down	-0.0289834	0.0610703	0.315537	0.0749143	-0.0614427		Hs.674001	gb:AW293315 /DB_XREF=gi:6699877 /DB_XREF=UI-H-BI2-ahj-a-12-0-UI.s1 /CLONE=IMAGE:2726711 /FEA=EST /CNT=5 /TID=Hs.211408.0 /TIER=ConsEnd /STK=1 /UG=Hs.211408 /UG_TITLE=ESTs
	233788_at	0.0110685	1.07546	0.104959	1.07546	up	1.19789	0.2605	1.19789	up	1.11861	0.161701	1.11861	up	1.01451	0.0207789	1.01451	up	-0.0761675	0.0287916	0.184333	0.0855333	-0.0553886		Hs.664468	gb:AK021679.1 /DB_XREF=gi:10432911 /FEA=mRNA /CNT=2 /TID=Hs.296659.0 /TIER=ConsEnd /STK=0 /UG=Hs.296659 /UG_TITLE=Homo sapiens cDNA FLJ11617 fis, clone HEMBA1004045 /DEF=Homo sapiens cDNA FLJ11617 fis, clone HEMBA1004045.
PKD1P6	214682_at	0.01108	-1.2049	-0.268911	1.2049	down	-1.13589	-0.183824	1.13589	down	-1.13776	-0.186199	1.13776	down	-1.25912	-0.332412	1.25912	down	0.225766	-0.0431455	0.0419417	0.0395665	-0.106646	353511	Hs.720303	gb:AK023376.1 /DB_XREF=gi:10435286 /FEA=mRNA /CNT=45 /TID=Hs.75813.1 /TIER=ConsEnd /STK=0 /UG=Hs.75813 /LL=5310 /UG_GENE=PKD1 /UG_TITLE=polycystic kidney disease 1 (autosomal dominant) /DEF=Homo sapiens cDNA FLJ13314 fis, clone OVARC1001506, highly similar to POLYCYSTIN PRECURSOR.
RAB39A	1554800_at	0.0110811	1.11906	0.162283	1.11906	up	1.06347	0.0887753	1.06347	up	1.09466	0.130479	1.09466	up	1.22493	0.292704	1.22493	up	-0.0723548	0.0899286	0.0164205	0.0581239	0.220349	54734	Hs.354906	gb:BC028064.1 /DB_XREF=gi:20380205 /TID=Hs2.354906.1 /CNT=4 /FEA=FLmRNA /TIER=FL /STK=1 /LL=54734 /UG_GENE=RAB39 /UG=Hs.354906 /DEF=Homo sapiens, RAB39, member RAS oncogene family, clone MGC:40186 IMAGE:5197104, mRNA, complete cds. /PROD=RAB39, member RAS oncogene family /FL=gb:BC028064.1
	234675_x_at	0.0110822	-1.00143	-0.00205761	1.00143	down	1.29706	0.375242	1.29706	up	1.07891	0.109573	1.07891	up	-1.11882	-0.161979	1.11882	down	-0.0331253	-0.035183	0.342117	0.0764477	-0.195104		Hs.532596	gb:AK027219.1 /DB_XREF=gi:10440298 /FEA=mRNA /CNT=1 /TID=Hs.306914.0 /TIER=ConsEnd /STK=0 /UG=Hs.306914 /UG_TITLE=Homo sapiens cDNA: FLJ23566 fis, clone LNG10880 /DEF=Homo sapiens cDNA: FLJ23566 fis, clone LNG10880.
	241675_s_at	0.0110835	1.01064	0.0152664	1.01064	up	1.35511	0.438409	1.35511	up	1.12651	0.171857	1.12651	up	-1.0673	-0.0939715	1.0673	down	0.0147813	0.0300477	0.45319	0.186639	-0.0791902		Hs.560305	gb:AI349737 /DB_XREF=gi:4086943 /DB_XREF=ta96a12.x1 /CLONE=IMAGE:2051902 /FEA=EST /CNT=7 /TID=Hs.217834.0 /TIER=ConsEnd /STK=0 /UG=Hs.217834 /UG_TITLE=ESTs
RBM19	205115_s_at	0.0110842	-1.14032	-0.189444	1.14032	down	-1.19158	-0.252876	1.19158	down	-1.20226	-0.265754	1.20226	down	-1.09091	-0.125533	1.09091	down	0.168947	-0.0204973	-0.0839291	-0.0968079	0.0434134	9904	Hs.7482	gb:NM_016196.1 /DB_XREF=gi:7705364 /GEN=DKFZp586F1023 /FEA=FLmRNA /CNT=43 /TID=Hs.7482.0 /TIER=FL+Stack /STK=11 /UG=Hs.7482 /LL=51418 /DEF=Homo sapiens hypothetical protein (DKFZp586F1023), mRNA. /PROD=hypothetical protein /FL=gb:NM_016196.1 gb:AL117547.1
INO80C	229582_at	0.0110874	-1.23345	-0.302697	1.23345	down	-1.28736	-0.36442	1.28736	down	-1.21956	-0.286363	1.21956	down	-1.13674	-0.184897	1.13674	down	0.24235	-0.0603471	-0.12207	-0.0440131	0.0574534	125476	Hs.464903	gb:AI758919 /DB_XREF=gi:5152644 /DB_XREF=ty83f12.x1 /CLONE=IMAGE:2285711 /FEA=EST /CNT=15 /TID=Hs.124475.0 /TIER=Stack /STK=13 /UG=Hs.124475 /UG_TITLE=ESTs
RAB6B	210127_at	0.0110932	1.31695	0.397202	1.31695	up	1.08572	0.118647	1.08572	up	1.23344	0.302682	1.23344	up	1.38778	0.472774	1.38778	up	-0.160471	0.236731	-0.0418244	0.142211	0.312303	51560	Hs.715344	gb:BC002510.1 /DB_XREF=gi:12803378 /FEA=FLmRNA /CNT=22 /TID=Hs.277445.0 /TIER=FL /STK=0 /UG=Hs.277445 /LL=51560 /UG_GENE=RAB6B /DEF=Homo sapiens, small GTPase RAB6B, clone MGC:829, mRNA, complete cds. /PROD=small GTPase RAB6B /FL=gb:NM_016577.1 gb:BC002510.1 gb:AF166492.1
ATL3	223453_s_at	0.0111246	1.09633	0.132682	1.09633	up	1.15664	0.20994	1.15664	up	1.1632	0.218101	1.1632	up	1.32866	0.409976	1.32866	up	-0.12696	0.0057221	0.0829807	0.0911412	0.283017	25923	Hs.356719	gb:BC005096.1 /DB_XREF=gi:13477254 /FEA=FLmRNA /CNT=49 /TID=Hs.27099.0 /TIER=FL /STK=0 /UG=Hs.27099 /LL=25923 /UG_GENE=DKFZP564J0863 /DEF=Homo sapiens, hypothetical protein FLJ23293 similar to ARL-6 interacting protein-2, clone MGC:13112, mRNA, complete cds. /PROD=hypothetical protein FLJ23293 similar to ARL-6interacting protein-2 /FL=gb:BC005096.1
	231658_x_at	0.011143	-1.16147	-0.215954	1.16147	down	-1.22941	-0.297966	1.22941	down	-1.17658	-0.234597	1.17658	down	-1.19489	-0.256879	1.19489	down	0.207459	-0.00849549	-0.0905071	-0.0271384	-0.0494202			gb:BG151154 /DB_XREF=gi:12663184 /DB_XREF=nai34c09.y1 /CLONE=IMAGE:4262009 /FEA=EST /CNT=30 /TID=Hs.300759.2 /TIER=Stack /STK=14 /UG=Hs.300759 /LL=25873 /UG_GENE=RPL36 /UG_TITLE=ribosomal protein L36
PACS1	220557_s_at	0.0111442	-1.09233	-0.127415	1.09233	down	-1.15525	-0.208199	1.15525	down	-1.14238	-0.19204	1.14238	down	-1.23985	-0.310165	1.23985	down	0.200188	0.072773	-0.00801124	0.0081483	-0.109977	55690	Hs.644326	gb:NM_018026.1 /DB_XREF=gi:8922284 /GEN=FLJ10209 /FEA=FLmRNA /CNT=5 /TID=Hs.260150.0 /TIER=FL /STK=3 /UG=Hs.260150 /LL=55690 /DEF=Homo sapiens hypothetical protein FLJ10209 (FLJ10209), mRNA. /PROD=hypothetical protein FLJ10209 /FL=gb:NM_018026.1
GAPDH	213453_x_at	0.0111483	1.18639	0.246575	1.18639	up	1.22151	0.28866	1.22151	up	1.14966	0.201211	1.14966	up	1.21877	0.285427	1.21877	up	-0.240977	0.00559786	0.0476826	-0.0397659	0.0444496	2597	Hs.544577	gb:BF689355 /DB_XREF=gi:11974763 /DB_XREF=602184994T1 /CLONE=IMAGE:4299431 /FEA=EST /CNT=35 /TID=Hs.169476.4 /TIER=Stack /STK=8 /UG=Hs.169476 /LL=2597 /UG_GENE=GAPD /UG_TITLE=glyceraldehyde-3-phosphate dehydrogenase
CCDC180///LOC100499484-C9ORF174	229628_s_at	0.0111694	-1.14376	-0.193789	1.14376	down	-1.27081	-0.345746	1.27081	down	-1.1784	-0.236827	1.1784	down	-1.08998	-0.124304	1.08998	down	0.219032	0.0252428	-0.126714	-0.017795	0.0947278	57653///100499483	Hs.435629	gb:AI831514 /DB_XREF=gi:5452185 /DB_XREF=wj49h05.x1 /CLONE=IMAGE:2406201 /FEA=mRNA /CNT=14 /TID=Hs.113426.0 /TIER=Stack /STK=8 /UG=Hs.113426 /LL=57653 /UG_GENE=KIAA1529 /UG_TITLE=KIAA1529 protein
PPEF2	208411_x_at	0.0111889	1.05563	0.0781083	1.05563	up	1.03625	0.0513716	1.03625	up	1.11528	0.157412	1.11528	up	1.07228	0.100682	1.07228	up	-0.0569006	0.0212077	-0.00552894	0.100511	0.0437813	5470	Hs.290873	gb:NM_006239.1 /DB_XREF=gi:5453943 /GEN=PPEF2 /FEA=FLmRNA /CNT=3 /TID=Hs.193558.0 /TIER=FL /STK=0 /UG=Hs.193558 /LL=5470 /DEF=Homo sapiens protein phosphatase, EF hand calcium-binding domain 2 (PPEF2), mRNA. /PROD=protein phosphatase, EF hand calcium-bindingdomain 2 /FL=gb:NM_006239.1 gb:AF023457.1 gb:AF023456.1
SLC39A8	228945_s_at	0.0111905	1.09345	0.128882	1.09345	up	1.1529	0.205271	1.1529	up	1.09822	0.135173	1.09822	up	1.2514	0.323541	1.2514	up	-0.117953	0.0109296	0.0873187	0.0172204	0.205589	64116	Hs.288034	gb:AW466967 /DB_XREF=gi:7037073 /DB_XREF=ha06e05.x1 /CLONE=IMAGE:2872928 /FEA=EST /CNT=31 /TID=Hs.284205.2 /TIER=Stack /STK=9 /UG=Hs.284205 /LL=64116 /UG_GENE=LOC64116 /UG_TITLE=up-regulated by BCG-CWS
PAX3	231666_at	0.0112199	1.03184	0.0452195	1.03184	up	1.10043	0.13807	1.10043	up	1.13105	0.17766	1.13105	up	1.12199	0.166063	1.12199	up	-0.0717236	-0.0265041	0.0663462	0.105937	0.0943391	5077	Hs.42146	gb:AA194168 /DB_XREF=gi:1783859 /DB_XREF=zr37h06.s1 /CLONE=IMAGE:665627 /FEA=EST /CNT=20 /TID=Hs.42146.0 /TIER=Stack /STK=15 /UG=Hs.42146 /UG_TITLE=ESTs
CHMP4B	225119_at	0.0112221	1.30549	0.384587	1.30549	up	1.7955	0.844386	1.7955	up	1.68651	0.754042	1.68651	up	1.96997	0.978177	1.96997	up	-0.631075	-0.246488	0.213311	0.122966	0.347102	128866	Hs.472471	gb:AW299290 /DB_XREF=gi:6708967 /DB_XREF=xs38f06.x1 /CLONE=IMAGE:2771939 /FEA=EST /CNT=105 /TID=Hs.164478.2 /TIER=Stack /STK=9 /UG=Hs.164478 /LL=64343 /UG_GENE=FLJ21939 /UG_TITLE=hypothetical protein FLJ21939 similar to 5-azacytidine induced gene 2
ZNF595	227952_at	0.0112519	1.15738	0.210865	1.15738	up	2.07393	1.05237	2.07393	up	1.18167	0.240831	1.18167	up	1.02393	0.0341115	1.02393	up	0.0506852	0.261551	1.10305	0.291516	0.0847967	152687	Hs.355711///Hs.709469	gb:AI580142 /DB_XREF=gi:4564518 /DB_XREF=tk16h01.x1 /CLONE=IMAGE:2151217 /FEA=EST /CNT=29 /TID=Hs.285681.4 /TIER=Stack /STK=12 /UG=Hs.285681 /LL=51085 /UG_GENE=WBSCR14 /UG_TITLE=Williams-Beuren syndrome chromosome region 14
LOC105370478	237582_at	0.0112581	1.07102	0.0989907	1.07102	up	1.1093	0.149656	1.1093	up	1.10564	0.144882	1.10564	up	1.01049	0.0150552	1.01049	up	-0.0773936	0.0215971	0.0722623	0.0674888	-0.0623384	105370478		gb:AW771563 /DB_XREF=gi:7703620 /DB_XREF=hn58d05.x1 /CLONE=IMAGE:3032073 /FEA=EST /CNT=7 /TID=Hs.149229.0 /TIER=ConsEnd /STK=6 /UG=Hs.149229 /UG_TITLE=ESTs
JADE2	212660_at	0.0112672	-1.55951	-0.64109	1.55951	down	-1.88573	-0.915124	1.88573	down	-1.55988	-0.641439	1.55988	down	-1.59336	-0.672076	1.59336	down	0.450298	-0.190791	-0.464825	-0.191141	-0.221778	23338	Hs.732155	gb:AI735639 /DB_XREF=gi:5057163 /DB_XREF=at18h12.x1 /CLONE=IMAGE:2355527 /FEA=mRNA /CNT=115 /TID=Hs.9729.1 /TIER=Stack /STK=31 /UG=Hs.9729 /LL=23338 /UG_GENE=KIAA0239 /UG_TITLE=KIAA0239 protein
GLRB	244680_at	0.011271	1.05603	0.0786516	1.05603	up	1.08272	0.114667	1.08272	up	1.01278	0.0183168	1.01278	up	1.03484	0.0494133	1.03484	up	-0.035798	0.0428536	0.0788685	-0.0174812	0.0136153	2743	Hs.32973	gb:AI701428 /DB_XREF=gi:4989328 /DB_XREF=we29h06.x1 /CLONE=IMAGE:2342555 /FEA=EST /CNT=5 /TID=Hs.145709.0 /TIER=ConsEnd /STK=0 /UG=Hs.145709 /UG_TITLE=ESTs
CDKN3	1555758_a_at	0.0112908	2.27996	1.18901	2.27996	up	1.70196	0.767201	1.70196	up	2.42116	1.2757	2.42116	up	3.36065	1.74874	3.36065	up	-0.46222	0.72679	0.30498	0.813478	1.28652	1033	Hs.84113	gb:AF213040.1 /DB_XREF=gi:12734657 /TID=Hs2.84113.5 /CNT=1 /FEA=FLmRNA /TIER=FL /STK=1 /LL=1033 /UG_GENE=CDKN3 /UG=Hs.84113 /DEF=Homo sapiens isolate BX-11 mutant cyclin-dependent kinase associated protein phosphatase mRNA, complete cds. /PROD=mutant cyclin-dependent kinase associatedprotein phosphatase /FL=gb:AF213040.1
	233412_x_at	0.0113258	-1.03024	-0.0429743	1.03024	down	1.08486	0.117511	1.08486	up	-1.02532	-0.0360731	1.02532	down	-1.13499	-0.182677	1.13499	down	0.0191116	-0.0238627	0.136622	-0.0169615	-0.163565		Hs.396593	gb:AW971238 /DB_XREF=gi:8161083 /DB_XREF=EST383327 /FEA=mRNA /CNT=4 /TID=Hs.296669.0 /TIER=ConsEnd /STK=0 /UG=Hs.296669 /UG_TITLE=Homo sapiens cDNA FLJ11849 fis, clone HEMBA1006709
	1557154_at	0.0113367	1.04211	0.0595062	1.04211	up	1.09458	0.13038	1.09458	up	1.15041	0.202144	1.15041	up	1.08279	0.11475	1.08279	up	-0.111741	-0.0522347	0.0186387	0.0904031	0.00300951		Hs.720460	gb:AI367357 /DB_XREF=gi:4137102 /DB_XREF=qv95d12.x1 /CLONE=IMAGE:1989335 /TID=Hs2.112083.1 /CNT=8 /FEA=mRNA /TIER=ConsEnd /STK=1 /UG=Hs.112083 /UG_TITLE=Homo sapiens, clone IMAGE:5301781, mRNA
ZNF329	219765_at	0.0113438	-1.22424	-0.291884	1.22424	down	-1.41975	-0.505639	1.41975	down	-1.37739	-0.461934	1.37739	down	-1.57413	-0.654559	1.57413	down	0.438347	0.146463	-0.0672921	-0.0235866	-0.216212	79673	Hs.458377	gb:NM_024620.1 /DB_XREF=gi:13375841 /GEN=FLJ12586 /FEA=FLmRNA /CNT=26 /TID=Hs.31844.0 /TIER=FL+Stack /STK=8 /UG=Hs.31844 /LL=79673 /DEF=Homo sapiens hypothetical protein FLJ12586 (FLJ12586), mRNA. /PROD=hypothetical protein FLJ12586 /FL=gb:NM_024620.1
ZNF204P	214823_at	0.0113489	-1.19882	-0.261618	1.19882	down	-1.24956	-0.321423	1.24956	down	-1.17513	-0.232823	1.17513	down	-1.20523	-0.269312	1.20523	down	0.272688	0.0110702	-0.0487355	0.0398647	0.00337574	7754	Hs.8198	gb:AF033199.1 /DB_XREF=gi:3252864 /FEA=mRNA /CNT=14 /TID=Hs.8198.0 /TIER=ConsEnd /STK=6 /UG=Hs.8198 /LL=7754 /UG_GENE=ZNF204 /UG_TITLE=zinc finger protein 204 /DEF=Homo sapiens C2H2 zinc finger protein pseudogene, mRNA sequence.
LOC101928307	1558795_at	0.0113493	-1.63657	-0.710675	1.63657	down	-1.1334	-0.180652	1.1334	down	-2.22815	-1.15584	2.22815	down	-2.55062	-1.35085	2.55062	down	0.985075	0.2744	0.804423	-0.17077	-0.365771	101928307	Hs.535825	gb:AL833240.1 /DB_XREF=gi:21733872 /TID=Hs2.313493.1 /CNT=8 /FEA=mRNA /TIER=ConsEnd /STK=0 /UG=Hs.313493 /UG_TITLE=Homo sapiens mRNA; cDNA DKFZp761P2319 (from clone DKFZp761P2319) /DEF=Homo sapiens mRNA; cDNA DKFZp761P2319 (from clone DKFZp761P2319).
PTCD3	228020_at	0.011356	-1.36242	-0.446168	1.36242	down	-1.40456	-0.49012	1.40456	down	-1.32041	-0.400982	1.32041	down	-1.34101	-0.423317	1.34101	down	0.329852	-0.116317	-0.160268	-0.07113	-0.0934655	55037	Hs.323489	gb:BG055431 /DB_XREF=gi:12516005 /DB_XREF=nad54c02.x1 /CLONE=IMAGE:3407234 /FEA=EST /CNT=26 /TID=Hs.40421.0 /TIER=Stack /STK=11 /UG=Hs.40421 /UG_TITLE=ESTs
ITGA7	209663_s_at	0.0113577	1.91476	0.937163	1.91476	up	1.70926	0.773374	1.70926	up	1.52742	0.611098	1.52742	up	2.46842	1.30359	2.46842	up	-0.501771	0.435392	0.271603	0.109327	0.801819	3679	Hs.524484	gb:AF072132.1 /DB_XREF=gi:3930582 /FEA=FLmRNA /CNT=69 /TID=Hs.74369.0 /TIER=FL /STK=0 /UG=Hs.74369 /LL=3679 /UG_GENE=ITGA7 /DEF=Homo sapiens integrin alpha-7 mRNA, complete cds. /PROD=integrin alpha-7 /FL=gb:NM_002206.1 gb:AF072132.1 gb:AF052050.1 gb:AF032108.1
VAMP3	201337_s_at	0.0113598	1.57712	0.657295	1.57712	up	1.5774	0.65755	1.5774	up	1.30187	0.380583	1.30187	up	1.2697	0.344491	1.2697	up	-0.432075	0.225221	0.225476	-0.0514914	-0.0875834	9341	Hs.66708	gb:NM_004781.2 /DB_XREF=gi:9257252 /GEN=VAMP3 /FEA=FLmRNA /CNT=259 /TID=Hs.66708.0 /TIER=FL /STK=0 /UG=Hs.66708 /LL=9341 /DEF=Homo sapiens vesicle-associated membrane protein 3 (cellubrevin) (VAMP3), mRNA. /PROD=vesicle-associated membrane protein 3 /FL=gb:NM_004781.2 gb:BC003570.1
	216123_x_at	0.0113708	-1.03585	-0.0508103	1.03585	down	1.08022	0.11133	1.08022	up	1.01314	0.0188338	1.01314	up	-1.04843	-0.0682344	1.04843	down	-0.0349963	-0.0858066	0.0763337	-0.0161625	-0.103231		Hs.677115	gb:AK024158.1 /DB_XREF=gi:10436469 /FEA=mRNA /CNT=2 /TID=Hs.303289.0 /TIER=ConsEnd /STK=0 /UG=Hs.303289 /UG_TITLE=Homo sapiens cDNA FLJ14096 fis, clone MAMMA1000752 /DEF=Homo sapiens cDNA FLJ14096 fis, clone MAMMA1000752.
GRIK2	215655_at	0.0113713	1.07753	0.107729	1.07753	up	1.09595	0.132177	1.09595	up	1.0792	0.109967	1.0792	up	1.03639	0.0515736	1.03639	up	-0.0728057	0.0349237	0.0593717	0.0371608	-0.0212321	2898	Hs.98262	gb:AU156204 /DB_XREF=gi:11017725 /DB_XREF=AU156204 /CLONE=PLACE1002583 /FEA=mRNA /CNT=4 /TID=Hs.306651.0 /TIER=ConsEnd /STK=1 /UG=Hs.306651 /UG_TITLE=Homo sapiens cDNA FLJ13435 fis, clone PLACE1002583, moderately similar to GLUTAMATE RECEPTOR, IONOTROPIC KAINATE 2 PRECURSOR
AFF4	239439_at	0.0113984	1.15617	0.209357	1.15617	up	1.51591	0.600189	1.51591	up	1.2865	0.363453	1.2865	up	1.43331	0.519355	1.43331	up	-0.231427	-0.0220697	0.368762	0.132027	0.287928	27125	Hs.519313	gb:BF963382 /DB_XREF=gi:12380657 /DB_XREF=QV2-NN0045-201200-576-d12 /FEA=EST /CNT=8 /TID=Hs.88808.0 /TIER=ConsEnd /STK=0 /UG=Hs.88808 /UG_TITLE=ESTs
POTEM	242912_at	0.0114027	1.04435	0.062607	1.04435	up	1.20896	0.273768	1.20896	up	1.06975	0.0972785	1.06975	up	-1.02172	-0.0310039	1.02172	down	-0.0148628	0.0477442	0.258906	0.0824157	-0.0458667	641455	Hs.640191	gb:AI041215 /DB_XREF=gi:3280409 /DB_XREF=ov77h06.x1 /CLONE=IMAGE:1643387 /FEA=EST /CNT=5 /TID=Hs.290217.0 /TIER=ConsEnd /STK=1 /UG=Hs.290217 /UG_TITLE=ESTs
KLHDC4///LOC105371397	229035_s_at	0.0114376	-1.30945	-0.388966	1.30945	down	-1.36764	-0.451688	1.36764	down	-1.40377	-0.489308	1.40377	down	-1.23365	-0.302936	1.23365	down	0.327316	-0.0616501	-0.124372	-0.161992	0.0243796	54758///105371397	Hs.123450	gb:AI797462 /DB_XREF=gi:5362934 /DB_XREF=we88c03.x1 /CLONE=IMAGE:2348164 /FEA=EST /CNT=26 /TID=Hs.67991.2 /TIER=Stack /STK=25 /UG=Hs.67991 /LL=54758 /UG_GENE=DKFZp434G0522 /UG_TITLE=hypothetical protein DKFZp434G0522
ACTG1	221607_x_at	0.0114396	1.08824	0.121996	1.08824	up	1.11882	0.161982	1.11882	up	1.08175	0.113371	1.08175	up	1.09684	0.133359	1.09684	up	-0.100234	0.0217612	0.0617475	0.0131365	0.0331244	71	Hs.514581	gb:BC001920.1 /DB_XREF=gi:12804934 /FEA=FLmRNA /CNT=20 /TID=Hs.14376.1 /TIER=FL /STK=0 /UG=Hs.14376 /LL=71 /UG_GENE=ACTG1 /DEF=Homo sapiens, actin, gamma 1, clone MGC:3728, mRNA, complete cds. /PROD=actin, gamma 1 /FL=gb:BC001920.1
RORC	228806_at	0.0115301	-1.19712	-0.259563	1.19712	down	-1.23228	-0.301333	1.23228	down	-1.17153	-0.228399	1.17153	down	-1.27907	-0.355098	1.27907	down	0.26086	0.00129684	-0.0404729	0.0324611	-0.0942379	6097	Hs.256022	gb:AI218580 /DB_XREF=gi:3798395 /DB_XREF=qh19f12.x1 /CLONE=IMAGE:1845167 /FEA=EST /CNT=18 /TID=Hs.81295.0 /TIER=Stack /STK=14 /UG=Hs.81295 /UG_TITLE=ESTs
TRAF4	242473_at	0.0115364	-1.04853	-0.0683665	1.04853	down	-1.09654	-0.132961	1.09654	down	-1.07444	-0.103581	1.07444	down	1.03069	0.0436115	1.03069	up	0.0589327	-0.0094338	-0.0740286	-0.0446486	0.102544	9618	Hs.8375	gb:BF000155 /DB_XREF=gi:10700430 /DB_XREF=7h18e09.x1 /CLONE=IMAGE:3316360 /FEA=EST /CNT=6 /TID=Hs.35437.1 /TIER=ConsEnd /STK=2 /UG=Hs.35437 /UG_TITLE=ESTs, Moderately similar to I38026 MLN 62 protein (H.sapiens)
	240355_at	0.011565	1.05408	0.0759795	1.05408	up	1.15249	0.204757	1.15249	up	1.10687	0.146487	1.10687	up	1.143	0.192828	1.143	up	-0.160025	-0.0840459	0.0447312	-0.0135384	0.0328024			gb:AI332373 /DB_XREF=gi:4068932 /DB_XREF=qq08d08.x1 /CLONE=IMAGE:1931919 /FEA=EST /CNT=4 /TID=Hs.156924.0 /TIER=ConsEnd /STK=4 /UG=Hs.156924 /UG_TITLE=ESTs
	244612_at	0.011565	1.01834	0.0262196	1.01834	up	1.14094	0.190223	1.14094	up	1.03156	0.044834	1.03156	up	-1.06025	-0.0844113	1.06025	down	-0.0128324	0.0133872	0.17739	0.0320015	-0.0972437			gb:AW117181 /DB_XREF=gi:6085765 /DB_XREF=xd83e08.x1 /CLONE=IMAGE:2604230 /FEA=EST /CNT=3 /TID=Hs.258886.0 /TIER=ConsEnd /STK=3 /UG=Hs.258886 /UG_TITLE=ESTs
CEP97	241836_x_at	0.0115784	1.1674	0.223297	1.1674	up	1.04823	0.0679545	1.04823	up	1.04813	0.0678181	1.04813	up	1.16273	0.217515	1.16273	up	-0.0701996	0.153097	-0.00224506	-0.00238149	0.147315	79598	Hs.444135	gb:R12027 /DB_XREF=gi:764762 /DB_XREF=yf53b10.r1 /CLONE=IMAGE:25822 /FEA=EST /CNT=7 /TID=Hs.125273.0 /TIER=ConsEnd /STK=0 /UG=Hs.125273 /UG_TITLE=ESTs
LOC643711	1570009_at	0.0115947	1.04731	0.0666952	1.04731	up	1.08243	0.114272	1.08243	up	1.10298	0.141406	1.10298	up	1.04991	0.0702655	1.04991	up	-0.0742388	-0.00754356	0.0400336	0.0671668	-0.00397329	643711	Hs.585557	gb:BC024008.1 /DB_XREF=gi:18645172 /TID=Hs2.382817.1 /CNT=2 /FEA=mRNA /TIER=ConsEnd /STK=0 /UG=Hs.382817 /UG_TITLE=Homo sapiens, clone IMAGE:4822577, mRNA /DEF=Homo sapiens, clone IMAGE:4822577, mRNA.
CHRM3	214596_at	0.0116079	1.08549	0.118346	1.08549	up	1.10643	0.14591	1.10643	up	1.07844	0.108943	1.07844	up	1.09194	0.126894	1.09194	up	-0.0960481	0.022298	0.0498624	0.0128951	0.0308464	1131		gb:T15991 /DB_XREF=gi:518153 /DB_XREF=IB2413 /FEA=FLmRNA /CNT=18 /TID=Hs.7138.0 /TIER=ConsEnd /STK=1 /UG=Hs.7138 /LL=1131 /UG_GENE=CHRM3 /UG_TITLE=cholinergic receptor, muscarinic 3 /FL=gb:NM_000740.1
MACC1	1566766_a_at	0.0116508	1.04829	0.0680317	1.04829	up	1.00564	0.00811684	1.00564	up	1.0976	0.134356	1.0976	up	1.10732	0.147078	1.10732	up	-0.0534323	0.0145993	-0.0453155	0.080924	0.0936453	346389	Hs.598388	gb:AL359055.1 /DB_XREF=gi:8518180 /TID=Hs2.67709.1 /CNT=1 /FEA=mRNA /TIER=ConsEnd /STK=0 /UG=Hs.67709 /UG_TITLE=Homo sapiens mRNA full length insert cDNA clone EUROIMAGE 2344436. /DEF=Homo sapiens mRNA full length insert cDNA clone EUROIMAGE 2344436.
CCDC90B	222577_at	0.0116673	1.04553	0.064238	1.04553	up	1.15556	0.208596	1.15556	up	1.07302	0.101674	1.07302	up	1.11878	0.16192	1.11878	up	-0.103023	-0.038785	0.105573	-0.00134889	0.0588973	60492	Hs.368866	gb:BG252899 /DB_XREF=gi:12762715 /DB_XREF=602365494F1 /CLONE=IMAGE:4473767 /FEA=FLmRNA /CNT=108 /TID=Hs.154938.0 /TIER=ConsEnd /STK=0 /UG=Hs.154938 /LL=60492 /UG_GENE=MDS025 /UG_TITLE=hypothetical protein MDS025 /FL=gb:AL136791.1 gb:NM_021825.1 gb:AF182424.1 gb:AF182412.1 gb:AF271782.1
NUDT5	222824_at	0.0116791	-1.46598	-0.551865	1.46598	down	-1.62617	-0.701476	1.62617	down	-1.17893	-0.237474	1.17893	down	-1.31531	-0.395401	1.31531	down	0.315992	-0.235873	-0.385484	0.0785185	-0.0794088	11164	Hs.656304	gb:AW237290 /DB_XREF=gi:6569679 /DB_XREF=xm69e05.x1 /CLONE=IMAGE:2689472 /FEA=FLmRNA /CNT=70 /TID=Hs.301957.0 /TIER=Stack /STK=26 /UG=Hs.301957 /LL=11164 /UG_GENE=NUDT5 /UG_TITLE=nudix (nucleoside diphosphate linked moiety X)-type motif 5 /FL=gb:NM_014142.1
	217643_x_at	0.0117092	-1.06406	-0.0895765	1.06406	down	1.10955	0.149973	1.10955	up	-1.04269	-0.0603087	1.04269	down	-1.18337	-0.242901	1.18337	down	0.0923164	0.00273988	0.24229	0.0320078	-0.150584			gb:AA443771 /DB_XREF=gi:2156446 /DB_XREF=zw95f08.s1 /CLONE=IMAGE:784743 /FEA=EST /CNT=3 /TID=Hs.270138.0 /TIER=ConsEnd /STK=3 /UG=Hs.270138 /UG_TITLE=ESTs
TTC23	219838_at	0.0117397	-1.00033	-0.000481407	1.00033	down	-1.04909	-0.0691446	1.04909	down	1.08156	0.113118	1.08156	up	1.07094	0.0988758	1.07094	up	-0.0115002	-0.0119816	-0.0806448	0.101617	0.0873756	64927	Hs.513195	gb:NM_022905.1 /DB_XREF=gi:12597646 /GEN=FLJ12572 /FEA=FLmRNA /CNT=18 /TID=Hs.139709.0 /TIER=FL /STK=2 /UG=Hs.139709 /LL=64927 /DEF=Homo sapiens hypothetical protein FLJ12572 (FLJ12572), mRNA. /PROD=hypothetical protein FLJ12572 /FL=gb:NM_022905.1
PDCD4	212593_s_at	0.0117533	-1.39784	-0.483201	1.39784	down	-1.62476	-0.700223	1.62476	down	-1.34542	-0.42806	1.34542	down	-1.48657	-0.571983	1.48657	down	0.353803	-0.129398	-0.34642	-0.0742562	-0.21818	27250	Hs.711490	gb:N92498 /DB_XREF=gi:1264807 /DB_XREF=zb28a04.s1 /CLONE=IMAGE:304878 /FEA=mRNA /CNT=121 /TID=Hs.326248.1 /TIER=Stack /STK=40 /UG=Hs.326248 /UG_TITLE=Homo sapiens cDNA: FLJ22071 fis, clone HEP11691
HP	206697_s_at	0.011791	1.75043	0.807708	1.75043	up	2.38785	1.25571	2.38785	up	1.96403	0.973816	1.96403	up	2.13411	1.09364	2.13411	up	-0.938669	-0.130961	0.317043	0.0351469	0.154968	3240	Hs.513711///Hs.702099	gb:NM_005143.1 /DB_XREF=gi:4826761 /GEN=HP /FEA=FLmRNA /CNT=29 /TID=Hs.75990.0 /TIER=FL /STK=0 /UG=Hs.75990 /LL=3240 /DEF=Homo sapiens haptoglobin (HP), mRNA. /PROD=haptoglobin /FL=gb:K00422.1 gb:L29394.1 gb:NM_005143.1
	237959_at	0.0118448	-1.13974	-0.188704	1.13974	down	-1.09361	-0.129104	1.09361	down	-1.11127	-0.152212	1.11127	down	-1.16394	-0.219016	1.16394	down	0.146554	-0.0421503	0.0174504	-0.00565784	-0.0724623			gb:AW937500 /DB_XREF=gi:8112924 /DB_XREF=QV3-DT0044-221299-045-a11 /FEA=EST /CNT=18 /TID=Hs.254379.0 /TIER=ConsEnd /STK=0 /UG=Hs.254379 /UG_TITLE=ESTs
ANKEF1	220144_s_at	0.0118599	-1.2781	-0.354006	1.2781	down	-1.28937	-0.366671	1.28937	down	-1.19883	-0.261631	1.19883	down	-1.23198	-0.300976	1.23198	down	0.317872	-0.0361345	-0.0487991	0.0562407	0.0168955	63926	Hs.70903	gb:NM_022096.1 /DB_XREF=gi:11545808 /GEN=FLJ21669 /FEA=FLmRNA /CNT=19 /TID=Hs.174644.0 /TIER=FL /STK=0 /UG=Hs.174644 /LL=63926 /DEF=Homo sapiens hypothetical protein FLJ21669 (FLJ21669), mRNA. /PROD=hypothetical protein FLJ21669 /FL=gb:NM_022096.1
CERS4	218922_s_at	0.0118652	-1.31953	-0.400024	1.31953	down	-1.20753	-0.272053	1.20753	down	-1.06588	-0.0920428	1.06588	down	-1.06519	-0.0911078	1.06519	down	0.228315	-0.171709	-0.0437389	0.136272	0.137207	79603	Hs.515111	gb:NM_024552.1 /DB_XREF=gi:13375716 /GEN=FLJ12089 /FEA=FLmRNA /CNT=61 /TID=Hs.11896.0 /TIER=FL+Stack /STK=19 /UG=Hs.11896 /LL=79603 /DEF=Homo sapiens hypothetical protein FLJ12089 (FLJ12089), mRNA. /PROD=hypothetical protein FLJ12089 /FL=gb:NM_024552.1
KDM8	237229_at	0.011873	-1.17067	-0.227338	1.17067	down	-1.13271	-0.179776	1.13271	down	-1.05812	-0.0815074	1.05812	down	-1.08097	-0.112327	1.08097	down	0.130707	-0.0966306	-0.0490689	0.0491996	0.01838	79831	Hs.145717	gb:AI268287 /DB_XREF=gi:3887454 /DB_XREF=qm03f04.x1 /CLONE=IMAGE:1880767 /FEA=EST /CNT=5 /TID=Hs.145717.0 /TIER=ConsEnd /STK=5 /UG=Hs.145717 /UG_TITLE=ESTs
TNFSF8	235735_at	0.0118987	-1.91412	-0.936679	1.91412	down	-2.10232	-1.07198	2.10232	down	-1.7958	-0.84463	1.7958	down	-1.78421	-0.835286	1.78421	down	0.792661	-0.144019	-0.279319	-0.0519696	-0.0426251	944	Hs.494901	gb:AI936516 /DB_XREF=gi:5675386 /DB_XREF=wd28h07.x1 /CLONE=IMAGE:2329501 /FEA=EST /CNT=16 /TID=Hs.101370.0 /TIER=ConsEnd /STK=5 /UG=Hs.101370 /UG_TITLE=ESTs
CFTR	234702_x_at	0.0119124	1.0808	0.112096	1.0808	up	1.09027	0.12468	1.09027	up	1.0544	0.0764276	1.0544	up	1.05215	0.0733446	1.05215	up	-0.052999	0.0590969	0.0716808	0.0234286	0.0203456	1080	Hs.661104	gb:S64699.1 /DB_XREF=gi:408285 /GEN=CFTR /FEA=mRNA /CNT=1 /TID=Hs.326797.0 /TIER=ConsEnd /STK=0 /UG=Hs.326797 /DEF=Homo sapiens cystic fibrosis transmembrane conductance regulator isoform 36 (CFTR) mRNA, partial cds. /PROD=cystic fibrosis transmembrane conductanceregulator isoform 36
	239939_at	0.0119224	1.13896	0.18772	1.13896	up	1.13216	0.179077	1.13216	up	1.12768	0.173352	1.12768	up	1.20211	0.265573	1.20211	up	-0.129349	0.0583716	0.0497286	0.0440029	0.136224			gb:AI056971 /DB_XREF=gi:3330760 /DB_XREF=oy89d03.x1 /CLONE=IMAGE:1672997 /FEA=EST /CNT=8 /TID=Hs.133301.0 /TIER=ConsEnd /STK=4 /UG=Hs.133301 /UG_TITLE=ESTs
RRP12	216909_at	0.0119312	1.1335	0.180786	1.1335	up	1.10627	0.145699	1.10627	up	1.07948	0.11034	1.07948	up	1.13983	0.188819	1.13983	up	-0.142995	0.037791	0.00270372	-0.0326553	0.045824	23223	Hs.434251	gb:AK021460.1 /DB_XREF=gi:10432652 /FEA=mRNA /CNT=1 /TID=Hs.60103.2 /TIER=ConsEnd /STK=0 /UG=Hs.60103 /LL=23223 /UG_GENE=KIAA0690 /UG_TITLE=KIAA0690 protein /DEF=Homo sapiens cDNA FLJ11398 fis, clone HEMBA1000637.
	241390_at	0.0119371	1.0067	0.00963659	1.0067	up	1.01493	0.02138	1.01493	up	1.0361	0.0511664	1.0361	up	1.1032	0.141688	1.1032	up	-0.029665	-0.0200284	-0.00828502	0.0215014	0.112023		Hs.666028	gb:AW117264 /DB_XREF=gi:6085848 /DB_XREF=xd86f06.x1 /CLONE=IMAGE:2604515 /FEA=EST /CNT=8 /TID=Hs.126252.0 /TIER=ConsEnd /STK=2 /UG=Hs.126252 /UG_TITLE=ESTs
	232670_at	0.0119381	-1.24493	-0.31606	1.24493	down	-1.12606	-0.171279	1.12606	down	-1.31743	-0.397729	1.31743	down	-1.32404	-0.404949	1.32404	down	0.288096	-0.0279642	0.116817	-0.109633	-0.116853		Hs.636495	gb:AL137339.1 /DB_XREF=gi:6807849 /FEA=mRNA /CNT=6 /TID=Hs.306452.0 /TIER=ConsEnd /STK=0 /UG=Hs.306452 /UG_TITLE=Homo sapiens mRNA; cDNA DKFZp434O039 (from clone DKFZp434O039) /DEF=Homo sapiens mRNA; cDNA DKFZp434O039 (from clone DKFZp434O039).
PTGER3	211909_x_at	0.0119688	-1.27904	-0.355063	1.27904	down	-1.24105	-0.311563	1.24105	down	-1.30447	-0.383459	1.30447	down	-1.40873	-0.494391	1.40873	down	0.397362	0.0422997	0.0857995	0.0139037	-0.0970286	5733	Hs.445000	gb:L32662.1 /DB_XREF=gi:484163 /FEA=FLmRNA /CNT=1 /TID=HsAffx.900372.1125 /TIER=FL /STK=0 /DEF=Human prostaglandin E2 receptor EP3 subtype isoform IV mRNA, complete cds. /PROD=prostaglandin E2 receptor /FL=gb:L32662.1
LGMN	201212_at	0.0119792	-1.11286	-0.154272	1.11286	down	-1.18849	-0.249135	1.18849	down	-1.03962	-0.0560539	1.03962	down	1.13133	0.178018	1.13133	up	0.078269	-0.0760028	-0.170867	0.0222151	0.256287	5641	Hs.18069	gb:D55696.1 /DB_XREF=gi:1890049 /FEA=FLmRNA /CNT=450 /TID=Hs.18069.0 /TIER=FL+Stack /STK=227 /UG=Hs.18069 /LL=5641 /UG_GENE=PRSC1 /DEF=Homo sapiens mRNA for cysteine protease, complete cds. /PROD=cysteine protease /FL=gb:D55696.1 gb:NM_005606.1 gb:BC003061.1
	241448_at	0.0120349	-1.14191	-0.191449	1.14191	down	-1.12008	-0.163603	1.12008	down	-1.22343	-0.290933	1.22343	down	-1.16408	-0.219185	1.16408	down	0.202182	0.010733	0.0385786	-0.0887512	-0.0170033		Hs.634355	gb:AI494500 /DB_XREF=gi:4395503 /DB_XREF=qz01a08.x1 /CLONE=IMAGE:2020214 /FEA=EST /CNT=5 /TID=Hs.272076.0 /TIER=ConsEnd /STK=4 /UG=Hs.272076 /UG_TITLE=ESTs
KLHL29	1554262_s_at	0.0120473	1.10407	0.142831	1.10407	up	1.04228	0.0597392	1.04228	up	1.11067	0.151433	1.11067	up	1.14631	0.196994	1.14631	up	-0.0844068	0.0584239	-0.0246676	0.0670259	0.112587	114818	Hs.130593	gb:BC015667.1 /DB_XREF=gi:15990535 /TID=Hs2.348392.1 /CNT=16 /FEA=FLmRNA /TIER=FL /STK=2 /LL=114818 /UG_GENE=KIAA1921 /UG=Hs.348392 /DEF=Homo sapiens, Similar to hypothetical protein FLJ14106, clone MGC:22936 IMAGE:4543235, mRNA, complete cds. /PROD=Similar to hypothetical protein FLJ14106 /FL=gb:BC015667.1
XKR4	237802_at	0.0120494	1.06977	0.0973018	1.06977	up	1.01587	0.0227107	1.01587	up	1.08901	0.123017	1.08901	up	1.02515	0.035837	1.02515	up	-0.0286132	0.0686886	-0.00590254	0.0944041	0.0072238	114786	Hs.130197	gb:R54212 /DB_XREF=gi:816114 /DB_XREF=yg98h10.s1 /CLONE=IMAGE:41835 /FEA=EST /CNT=6 /TID=Hs.13390.0 /TIER=ConsEnd /STK=6 /UG=Hs.13390 /UG_TITLE=ESTs
	1563032_at	0.012051	-1.04705	-0.0663314	1.04705	down	1.04525	0.0638538	1.04525	up	1.02926	0.0416076	1.02926	up	-1.03834	-0.0542741	1.03834	down	-0.00708303	-0.0734144	0.0567707	0.0345245	-0.0613571		Hs.434640	gb:BC040843.1 /DB_XREF=gi:26454826 /TID=Hs2.434330.1 /CNT=2 /FEA=mRNA /TIER=ConsEnd /STK=0 /UG=Hs.434330 /UG_TITLE=Homo sapiens, clone IMAGE:5311737, mRNA /DEF=Homo sapiens, clone IMAGE:5311737, mRNA.
PSEN1	207782_s_at	0.0120535	1.083	0.115038	1.083	up	1.37354	0.4579	1.37354	up	1.25307	0.325462	1.25307	up	1.24628	0.317625	1.24628	up	-0.284713	-0.169676	0.173187	0.0407483	0.0329117	5663	Hs.3260	gb:NM_007319.1 /DB_XREF=gi:7549814 /GEN=PSEN1 /FEA=FLmRNA /CNT=3 /TID=Hs.3260.1 /TIER=FL /STK=0 /UG=Hs.3260 /LL=5663 /DEF=Homo sapiens presenilin 1 (Alzheimer disease 3) (PSEN1), transcript variant I-374., mRNA. /PROD=presenilin 1 isoform I-374 /FL=gb:NM_007319.1 gb:U40380.1
	217606_at	0.0120571	1.4822	0.567739	1.4822	up	1.6275	0.70266	1.6275	up	1.33809	0.420177	1.33809	up	1.34218	0.42458	1.34218	up	-0.329798	0.237941	0.372862	0.0903786	0.0947823			gb:AI653960 /DB_XREF=gi:4737939 /DB_XREF=ty03h10.x1 /CLONE=IMAGE:2278051 /FEA=EST /CNT=8 /TID=Hs.196555.0 /TIER=ConsEnd /STK=1 /UG=Hs.196555 /UG_TITLE=ESTs
DSCR3	217309_s_at	0.0120904	1.50387	0.588683	1.50387	up	1.4411	0.527166	1.4411	up	1.26537	0.339557	1.26537	up	1.42664	0.512619	1.42664	up	-0.441371	0.147312	0.0857954	-0.101814	0.0712477	10311	Hs.369488	gb:AJ001867.1 /DB_XREF=gi:2969904 /FEA=mRNA /CNT=1 /TID=Hs.26146.1 /TIER=ConsEnd /STK=0 /UG=Hs.26146 /LL=10311 /UG_GENE=DSCR3 /DEF=Homo Sapiens mRNA, partial cDNA sequence from cDNA selection, DCR1-11.0. /PROD=hypothetical protein
SLC2A10	221024_s_at	0.0120923	1.06255	0.0875246	1.06255	up	1.07017	0.0978405	1.07017	up	1.13716	0.185429	1.13716	up	1.03948	0.055859	1.03948	up	-0.0736085	0.0139161	0.024232	0.111821	-0.0177495	81031	Hs.305971	gb:NM_030777.1 /DB_XREF=gi:13540546 /GEN=SLC2A10 /FEA=FLmRNA /CNT=1 /TID=HsAffx.900052.38 /TIER=FL /STK=0 /DEF=Homo sapiens solute carrier family 2 (facilitated glucose transporter), member 10 (SLC2A10), mRNA. /PROD=solute carrier family 2 (facilitated glucosetransporter), member 10 /FL=gb:NM_030777.1
	1558695_at	0.0120974	1.11634	0.158783	1.11634	up	1.2768	0.352529	1.2768	up	1.19685	0.259248	1.19685	up	1.10065	0.138355	1.10065	up	-0.157319	0.00146405	0.19521	0.101929	-0.0189637		Hs.658635	gb:AF085937.1 /DB_XREF=gi:3483281 /TID=Hs2.38348.1 /CNT=7 /FEA=mRNA /TIER=ConsEnd /STK=0 /UG=Hs.38348 /UG_TITLE=Homo sapiens full length insert cDNA clone YR58H12 /DEF=Homo sapiens full length insert cDNA clone YR58H12.
	237850_at	0.0121016	-1.01837	-0.0262655	1.01837	down	1.05458	0.0766641	1.05458	up	1.05653	0.0793287	1.05653	up	1.02628	0.0374224	1.02628	up	-0.0326417	-0.0589072	0.0440224	0.0466871	0.00478072			gb:BF224177 /DB_XREF=gi:11131427 /DB_XREF=7q84f02.x1 /CLONE=IMAGE:3704979 /FEA=EST /CNT=5 /TID=Hs.208486.0 /TIER=ConsEnd /STK=5 /UG=Hs.208486 /UG_TITLE=ESTs
SBK1	226549_at	0.0121251	-1.35633	-0.439711	1.35633	down	-1.40054	-0.485978	1.40054	down	-1.35614	-0.439506	1.35614	down	-1.17756	-0.2358	1.17756	down	0.362682	-0.0770285	-0.123296	-0.076824	0.126882	388228	Hs.97837	gb:BF447901 /DB_XREF=gi:11513039 /DB_XREF=7q96h03.x1 /CLONE=IMAGE:3706229 /FEA=mRNA /CNT=53 /TID=Hs.97837.0 /TIER=Stack /STK=27 /UG=Hs.97837 /UG_TITLE=Homo sapiens mRNA; cDNA DKFZp547J047 (from clone DKFZp547J047)
CAPN2	214888_at	0.0121271	-1.13922	-0.188044	1.13922	down	-1.19006	-0.25103	1.19006	down	-1.18341	-0.242953	1.18341	down	-1.06403	-0.0895345	1.06403	down	0.172202	-0.0158429	-0.078828	-0.0707518	0.082667	824	Hs.350899	gb:AK023851.1 /DB_XREF=gi:10435914 /FEA=mRNA /CNT=10 /TID=Hs.76288.1 /TIER=ConsEnd /STK=0 /UG=Hs.76288 /LL=824 /UG_GENE=CAPN2 /UG_TITLE=calpain 2, (mII) large subunit /DEF=Homo sapiens cDNA FLJ13789 fis, clone SKNMC1000050, moderately similar to CALPAIN 2, LARGE (CATALYTIC) SUBUNIT (EC 3.4.22.17).
ZNF30	232014_at	0.0121506	-1.32182	-0.40253	1.32182	down	-1.30382	-0.382743	1.30382	down	-1.22591	-0.293854	1.22591	down	-1.22283	-0.290224	1.22283	down	0.314794	-0.0877359	-0.0679484	0.0209406	0.0245705	90075	Hs.657402	gb:AI700188 /DB_XREF=gi:4988088 /DB_XREF=wd41f05.x1 /CLONE=IMAGE:2330721 /FEA=mRNA /CNT=18 /TID=Hs.107444.0 /TIER=ConsEnd /STK=0 /UG=Hs.107444 /UG_TITLE=Homo sapiens cDNA FLJ20562 fis, clone KAT11992
MDGA2	239935_at	0.0121506	1.06815	0.0951196	1.06815	up	1.06737	0.0940653	1.06737	up	1.0815	0.113027	1.0815	up	1.04351	0.0614433	1.04351	up	-0.071864	0.0232556	0.0222013	0.0411632	-0.0104207	161357	Hs.436380	gb:D51315 /DB_XREF=gi:951551 /DB_XREF=HUM025H04B /CLONE=GEN-025H04 /FEA=EST /CNT=8 /TID=Hs.106289.0 /TIER=ConsEnd /STK=0 /UG=Hs.106289 /UG_TITLE=ESTs
SNAP23	214544_s_at	0.0121582	1.31361	0.393533	1.31361	up	1.41171	0.497448	1.41171	up	1.35374	0.436955	1.35374	up	1.32092	0.401546	1.32092	up	-0.389404	0.00412846	0.108043	0.0475505	0.0121414	8773	Hs.511149	gb:NM_003825.1 /DB_XREF=gi:4507096 /GEN=SNAP23 /FEA=FLmRNA /CNT=3 /TID=Hs.184376.1 /TIER=FL /STK=0 /UG=Hs.184376 /LL=8773 /DEF=Homo sapiens synaptosomal-associated protein, 23kD (SNAP23), mRNA. /PROD=synaptosomal-associated protein, 23kD /FL=gb:NM_003825.1 gb:Y09568.1
ZNF790-AS1	235779_at	0.012195	-1.11038	-0.151056	1.11038	down	-1.08175	-0.113372	1.08175	down	-1.17701	-0.235132	1.17701	down	-1.22676	-0.294848	1.22676	down	0.185368	0.0343121	0.0719966	-0.0497638	-0.10948	284408	Hs.570010	gb:AW467077 /DB_XREF=gi:7037183 /DB_XREF=ha09c02.x1 /CLONE=IMAGE:2873186 /FEA=EST /CNT=7 /TID=Hs.103362.0 /TIER=ConsEnd /STK=7 /UG=Hs.103362 /UG_TITLE=ESTs
DDR1-AS1	216459_x_at	0.0122113	-1.07092	-0.0988565	1.07092	down	1.09538	0.131428	1.09538	up	-1.04154	-0.0587208	1.04154	down	-1.13613	-0.184132	1.13613	down	0.0647234	-0.0341332	0.196152	0.00600259	-0.119409	414771		gb:AL137624.1 /DB_XREF=gi:6808420 /FEA=mRNA /CNT=1 /TID=Hs.306476.0 /TIER=ConsEnd /STK=0 /UG=Hs.306476 /UG_TITLE=Homo sapiens mRNA; cDNA DKFZp434M1812 (from clone DKFZp434M1812) /DEF=Homo sapiens mRNA; cDNA DKFZp434M1812 (from clone DKFZp434M1812).
IGF2BP3	216493_s_at	0.0122518	1.29578	0.373826	1.29578	up	1.08209	0.11382	1.08209	up	1.32181	0.402515	1.32181	up	1.39767	0.483028	1.39767	up	-0.15699	0.216836	-0.0431701	0.245525	0.326038	10643	Hs.700696	gb:AL023775 /DB_XREF=gi:3646096 /FEA=DNA /CNT=1 /TID=Hs.300813.0 /TIER=ConsEnd /STK=0 /UG=Hs.300813 /UG_TITLE=Human DNA sequence from clone 497J21 on chromosome 6q26-27. Contains a KOC (KH-domain containg transcript overexpressed in cancer) pseudogene, genomic marker D6S193, ESTs, STSs and GSSs, and a ca repeat polymorphism /DEF=Human DNA sequence from clone 497J21 on chromosome 6q26-27. Contains…
SSR3	237817_at	0.012268	1.03579	0.0507269	1.03579	up	1.04035	0.0570703	1.04035	up	1.10838	0.148447	1.10838	up	1.19831	0.261005	1.19831	up	-0.0672727	-0.0165458	-0.0102024	0.0811742	0.193733	6747		gb:AI939474 /DB_XREF=gi:5678437 /DB_XREF=tf36c12.x5 /CLONE=IMAGE:2098294 /FEA=EST /CNT=6 /TID=Hs.165112.0 /TIER=ConsEnd /STK=6 /UG=Hs.165112 /UG_TITLE=ESTs
DACH2	239738_at	0.0122824	-1.01277	-0.0182997	1.01277	down	1.07514	0.104523	1.07514	up	1.07325	0.101988	1.07325	up	1.02841	0.0404179	1.02841	up	-0.0428182	-0.0611179	0.0617044	0.0591694	-0.0024003	117154	Hs.86603	gb:AW780006 /DB_XREF=gi:7794609 /DB_XREF=hn92a03.x1 /CLONE=IMAGE:3035308 /FEA=EST /CNT=5 /TID=Hs.86603.0 /TIER=ConsEnd /STK=4 /UG=Hs.86603 /UG_TITLE=ESTs
	222207_x_at	0.012306	-1.00481	-0.00691924	1.00481	down	1.10036	0.137982	1.10036	up	-1.04519	-0.0637686	1.04519	down	-1.21706	-0.283397	1.21706	down	0.0889537	0.0820344	0.226935	0.0251851	-0.194444		Hs.711232	gb:AK024602.1 /DB_XREF=gi:10436915 /FEA=mRNA /CNT=2 /TID=Hs.220255.0 /TIER=ConsEnd /STK=0 /UG=Hs.220255 /UG_TITLE=Homo sapiens cDNA: FLJ20949 fis, clone ADSE01902 /DEF=Homo sapiens cDNA: FLJ20949 fis, clone ADSE01902.
LPCAT4	40472_at	0.0123155	-1.11405	-0.155814	1.11405	down	-1.35755	-0.441009	1.35755	down	-1.04893	-0.068917	1.04893	down	-1.0604	-0.0846138	1.0604	down	0.103946	-0.051868	-0.337063	0.0350295	0.0193326	254531	Hs.352614	Cluster Incl. AF007155:Homo sapiens clone 23763 unknown mRNA, partial cds /cds=(0,314) /gb=AF007155 /gi=2852635 /ug=Hs.168694 /len=1369
ND2	1553551_s_at	0.0123668	-1.05195	-0.0730651	1.05195	down	-1.17119	-0.227976	1.17119	down	-1.13092	-0.177499	1.13092	down	-1.18727	-0.247645	1.18727	down	0.123533	0.0504678	-0.104443	-0.0539656	-0.124112	4536		gb:NM_173709.1 /DB_XREF=gi:27754201 /GEN=MTND2 /TID=Hs2Affx.1.29 /CNT=1 /FEA=FLmRNA /TIER=FL /STK=1 /NOTE=sequence(s) not in UniGene /DEF=Homo sapiens NADH dehydrogenase 2 (MTND2), nuclear gene encoding mitochondrial protein, mRNA. /PROD=NADH dehydrogenase 2 /FL=gb:NM_173709.1
RSU1	1569543_at	0.012382	-1.08271	-0.11465	1.08271	down	-1.00831	-0.0119445	1.00831	down	-1.07949	-0.110347	1.07949	down	-1.05832	-0.0817783	1.05832	down	0.0524941	-0.0621558	0.0405496	-0.057853	-0.0292842	6251		gb:BC008384.1 /DB_XREF=gi:14249993 /TID=Hs2.382142.1 /CNT=3 /FEA=mRNA /TIER=ConsEnd /STK=0 /UG=Hs.382142 /UG_TITLE=Homo sapiens, clone IMAGE:3949969, mRNA /DEF=Homo sapiens, clone IMAGE:3949969, mRNA.
IL2RA	211269_s_at	0.0124084	1.03571	0.0506144	1.03571	up	-1.14482	-0.195126	1.14482	down	1.04952	0.0697294	1.04952	up	1.18882	0.249535	1.18882	up	0.0743783	0.124993	-0.120748	0.144108	0.323914	3559	Hs.231367	gb:K03122.1 /DB_XREF=gi:186319 /GEN=IL2R /FEA=FLmRNA /CNT=1 /TID=Hs.1724.1 /TIER=FL /STK=0 /UG=Hs.1724 /LL=3559 /UG_TITLE=interleukin 2 receptor, alpha /DEF=Human interleukin-2 receptor mRNA (short form), complete cds. /FL=gb:K03122.1
	216575_at	0.0124119	-1.0769	-0.106878	1.0769	down	1.03119	0.0443032	1.03119	up	-1.00124	-0.00178382	1.00124	down	-1.05881	-0.0824398	1.05881	down	0.0272763	-0.0796016	0.0715794	0.0254924	-0.0551635			gb:AL035604 /DB_XREF=gi:5002622 /FEA=DNA_2 /CNT=1 /TID=Hs.247895.0 /TIER=ConsEnd /STK=0 /UG=Hs.247895 /UG_TITLE=Human DNA sequence from clone 38C16 on chromosome 6q22.33-24.1. Contains GAPD (glyceraldehyde 3-phosphate dehydrogenease, GAPDH) and HMG1 (high mobility group protein 1) pseudogenes, ESTs, STSs and GSSs /DEF=Human DNA sequence from clone 38C16 on chromosome 6q22.33-24.1. Contains GAPD (…
SNX8	228231_at	0.0124351	-1.22385	-0.291431	1.22385	down	-1.19657	-0.258905	1.19657	down	-1.24781	-0.3194	1.24781	down	-1.16352	-0.218495	1.16352	down	0.243821	-0.0476098	-0.0150843	-0.0755789	0.0253255	29886	Hs.584900	gb:BE221804 /DB_XREF=gi:8909122 /DB_XREF=hr59f12.x1 /CLONE=IMAGE:3132815 /FEA=EST /CNT=22 /TID=Hs.129771.0 /TIER=Stack /STK=13 /UG=Hs.129771 /UG_TITLE=ESTs
PABPC1L2B	1557203_at	0.0124859	1.00041	0.000588052	1.00041	up	1.0066	0.00949447	1.0066	up	1.07709	0.107138	1.07709	up	1.07467	0.103898	1.07467	up	-0.0285693	-0.0279812	-0.0190748	0.0785683	0.0753284	645974	Hs.567854	gb:BC041956.1 /DB_XREF=gi:27469823 /TID=Hs2.435313.1 /CNT=9 /FEA=mRNA /TIER=ConsEnd /STK=1 /UG=Hs.435313 /UG_TITLE=Homo sapiens, Similar to poly(A) binding protein, cytoplasmic 1, clone IMAGE:5302003, mRNA, partial cds /DEF=Homo sapiens, Similar to poly(A) binding protein, cytoplasmic 1, clone IMAGE:5302003, mRNA, partial cds.
VPS8	1559500_at	0.0124934	1.13534	0.183119	1.13534	up	1.53097	0.614445	1.53097	up	1.65327	0.725323	1.65327	up	1.40157	0.487046	1.40157	up	-0.538165	-0.355046	0.0762805	0.187158	-0.0511192	23355	Hs.269263	gb:BC036005.1 /DB_XREF=gi:23271187 /TID=Hs2.398163.1 /CNT=6 /FEA=mRNA /TIER=ConsEnd /STK=0 /UG=Hs.398163 /UG_TITLE=Homo sapiens, clone IMAGE:4733107, mRNA /DEF=Homo sapiens, clone IMAGE:4733107, mRNA.
	240296_at	0.0124945	1.11394	0.15567	1.11394	up	1.01935	0.0276526	1.01935	up	1.03197	0.0453993	1.03197	up	1.04948	0.0696725	1.04948	up	-0.0450319	0.110638	-0.0173793	0.000367333	0.0246406			gb:BF224366 /DB_XREF=gi:11131646 /DB_XREF=7q86e10.x1 /CLONE=IMAGE:3705307 /FEA=EST /CNT=4 /TID=Hs.221772.0 /TIER=ConsEnd /STK=4 /UG=Hs.221772 /UG_TITLE=ESTs
ADD3-AS1	228215_at	0.0125439	1.21579	0.281889	1.21579	up	1.27987	0.355992	1.27987	up	1.15699	0.21038	1.15699	up	1.24954	0.321393	1.24954	up	-0.200971	0.0809181	0.155021	0.00940918	0.120422	100505933	Hs.604103	gb:AW149374 /DB_XREF=gi:6197270 /DB_XREF=xf36d05.x1 /CLONE=IMAGE:2620137 /FEA=EST /CNT=21 /TID=Hs.324470.3 /TIER=Stack /STK=11 /UG=Hs.324470 /LL=120 /UG_GENE=ADD3 /UG_TITLE=adducin 3 (gamma)
NT5E	227486_at	0.0125685	-1.26644	-0.340783	1.26644	down	-1.34021	-0.422464	1.34021	down	-1.25462	-0.327252	1.25462	down	-1.186	-0.246098	1.186	down	0.330214	-0.0105695	-0.0922504	0.0029615	0.0841152	4907	Hs.153952	gb:AI086864 /DB_XREF=gi:3425287 /DB_XREF=oz86d01.x1 /CLONE=IMAGE:1682209 /FEA=EST /CNT=43 /TID=Hs.153952.1 /TIER=Stack /STK=10 /UG=Hs.153952 /LL=4907 /UG_GENE=NT5 /UG_TITLE=5 nucleotidase (CD73)
XIAP	206537_at	0.0125764	1.14042	0.189561	1.14042	up	1.21054	0.275655	1.21054	up	1.23328	0.302501	1.23328	up	1.20737	0.271862	1.20737	up	-0.178857	0.0107037	0.0967976	0.123644	0.093005	331		gb:NM_001167.1 /DB_XREF=gi:4502142 /GEN=BIRC4 /FEA=FLmRNA /CNT=13 /TID=Hs.172777.0 /TIER=FL /STK=0 /UG=Hs.172777 /LL=331 /DEF=Homo sapiens baculoviral IAP repeat-containing 4 (BIRC4), mRNA. /PROD=baculoviral IAP repeat-containing protein 4 /FL=gb:U32974.1 gb:NM_001167.1 gb:U45880.1
ITGA7	216331_at	0.0125901	1.96538	0.974811	1.96538	up	1.92409	0.944174	1.92409	up	1.698	0.763834	1.698	up	2.59734	1.37703	2.59734	up	-0.566675	0.408136	0.377499	0.197159	0.810359	3679	Hs.524484	gb:AK022548.1 /DB_XREF=gi:10434001 /FEA=mRNA /CNT=1 /TID=Hs.74369.1 /TIER=ConsEnd /STK=0 /UG=Hs.74369 /LL=3679 /UG_GENE=ITGA7 /UG_TITLE=integrin, alpha 7 /DEF=Homo sapiens cDNA FLJ12486 fis, clone NT2RM2000566, highly similar to Homo sapiens integrin alpha-7 mRNA.
LOC284561	232689_at	0.0126024	1.1162	0.1586	1.1162	up	1.0955	0.131585	1.0955	up	1.04851	0.0683431	1.04851	up	1.04665	0.065775	1.04665	up	-0.0698906	0.0887089	0.0616939	-0.00154753	-0.00411563	284561	Hs.504540///Hs.744604	gb:AU156837 /DB_XREF=gi:11018358 /DB_XREF=AU156837 /CLONE=PLACE1004934 /FEA=mRNA /CNT=10 /TID=Hs.141441.1 /TIER=ConsEnd /STK=1 /UG=Hs.141441 /UG_TITLE=Homo sapiens cDNA FLJ13747 fis, clone PLACE3000276
	1560296_at	0.0126216	1.04389	0.0619695	1.04389	up	1.04042	0.0571632	1.04042	up	1.05957	0.0834788	1.05957	up	1.15821	0.211891	1.15821	up	-0.0660026	-0.00403309	-0.00883938	0.0174762	0.145888		Hs.686190	gb:AV702787 /DB_XREF=gi:10719117 /DB_XREF=AV702787 /CLONE=ADBAGG03 /TID=Hs2.378432.2 /CNT=4 /FEA=mRNA /TIER=ConsEnd /STK=0 /UG=Hs.378432 /UG_TITLE=Homo sapiens, clone IMAGE:4732650, mRNA
	241846_at	0.0126239	1.10062	0.13831	1.10062	up	1.07588	0.10552	1.07588	up	1.05837	0.0818465	1.05837	up	1.16247	0.217193	1.16247	up	-0.0976985	0.0406117	0.00782145	-0.015852	0.119495		Hs.663638	gb:AI811800 /DB_XREF=gi:5398366 /DB_XREF=tw32c07.x1 /CLONE=IMAGE:2261388 /FEA=EST /CNT=6 /TID=Hs.162343.0 /TIER=ConsEnd /STK=3 /UG=Hs.162343 /UG_TITLE=ESTs
FAM118A	226475_at	0.0126293	-1.45667	-0.542675	1.45667	down	-1.78717	-0.837676	1.78717	down	-1.72963	-0.790467	1.72963	down	-1.5952	-0.673736	1.5952	down	0.538557	-0.00411881	-0.299119	-0.25191	-0.135179	55007	Hs.265018	gb:AI650582 /DB_XREF=gi:4734561 /DB_XREF=wa92g03.x1 /CLONE=IMAGE:2303668 /FEA=mRNA /CNT=50 /TID=Hs.13179.0 /TIER=Stack /STK=40 /UG=Hs.13179 /UG_TITLE=Homo sapiens cDNA: FLJ22586 fis, clone HSI02774
FSD1L	242586_at	0.0126337	1.69222	0.758914	1.69222	up	1.91297	0.935813	1.91297	up	1.2823	0.358737	1.2823	up	1.31086	0.390515	1.31086	up	-0.306228	0.452685	0.629585	0.052509	0.0842867	83856	Hs.136901	gb:H07986 /DB_XREF=gi:872808 /DB_XREF=yl86g01.r1 /CLONE=IMAGE:45132 /FEA=EST /CNT=6 /TID=Hs.136901.0 /TIER=ConsEnd /STK=0 /UG=Hs.136901 /UG_TITLE=ESTs
PHLPP1	210919_at	0.0126486	-1.03035	-0.0431332	1.03035	down	-1.04596	-0.0648327	1.04596	down	-1.0397	-0.056163	1.0397	down	-1.11165	-0.152704	1.11165	down	0.0610241	0.0178908	-0.0038086	0.00486109	-0.0916799	23239	Hs.465337	gb:AF130097.1 /DB_XREF=gi:11493497 /FEA=FLmRNA /CNT=2 /TID=Hs.306963.0 /TIER=FL /STK=0 /UG=Hs.306963 /DEF=Homo sapiens clone FLC0964 PRO2946 mRNA, complete cds. /PROD=PRO2946 /FL=gb:AF130097.1
GPR183	205419_at	0.0126532	-1.75525	-0.811679	1.75525	down	-2.36961	-1.24465	2.36961	down	-2.01079	-1.00776	2.01079	down	-2.01357	-1.00976	2.01357	down	0.74989	-0.0617892	-0.494761	-0.257875	-0.259869	1880	Hs.784	gb:NM_004951.1 /DB_XREF=gi:4826705 /GEN=EBI2 /FEA=FLmRNA /CNT=43 /TID=Hs.784.0 /TIER=FL+Stack /STK=10 /UG=Hs.784 /LL=1880 /DEF=Homo sapiens Epstein-Barr virus induced gene 2 (lymphocyte-specific G protein-coupled receptor) (EBI2), mRNA. /PROD=Epstein-Barr virus induced gene 2(lymphocyte-specific G protein-coupled receptor) /FL=gb:L08177.1 gb:NM_004951.1
MAPK14	211561_x_at	0.0126598	1.78275	0.834104	1.78275	up	2.23115	1.15779	2.23115	up	1.9326	0.95054	1.9326	up	1.76914	0.823045	1.76914	up	-0.780941	0.0531628	0.376849	0.169598	0.0421033	1432	Hs.485233	gb:L35253.1 /DB_XREF=gi:529039 /FEA=FLmRNA /CNT=1 /TID=Hs.79107.2 /TIER=FL /STK=0 /UG=Hs.79107 /LL=1432 /UG_GENE=MAPK14 /DEF=Human p38 mitogen activated protein (MAP) kinase mRNA, complete cds. /PROD=MAP kinase /FL=gb:L35253.1
WDR27	238239_at	0.0126915	1.09555	0.131661	1.09555	up	1.12289	0.167221	1.12289	up	1.08444	0.116949	1.08444	up	1.0944	0.130141	1.0944	up	-0.100561	0.0310994	0.0666598	0.0163875	0.0295795	253769	Hs.131903	gb:AA947865 /DB_XREF=gi:3109118 /DB_XREF=ok21g07.s1 /CLONE=IMAGE:1508508 /FEA=EST /CNT=10 /TID=Hs.120999.0 /TIER=ConsEnd /STK=4 /UG=Hs.120999 /UG_TITLE=ESTs
RAB27A	209515_s_at	0.0127058	1.34204	0.424426	1.34204	up	1.63498	0.709277	1.63498	up	1.37348	0.45784	1.37348	up	1.14222	0.191841	1.14222	up	-0.450795	-0.0263686	0.258483	0.00704575	-0.258953	5873	Hs.654978	gb:U38654.3 /DB_XREF=gi:4887230 /FEA=FLmRNA /CNT=83 /TID=Hs.50477.1 /TIER=FL+Stack /STK=8 /UG=Hs.50477 /LL=5873 /UG_GENE=RAB27A /DEF=Homo sapiens Rab27a mRNA, complete cds. /PROD=Rab27a /FL=gb:U38654.3
ACTG1	201550_x_at	0.0127062	1.11757	0.160371	1.11757	up	1.17006	0.226585	1.17006	up	1.12276	0.167046	1.12276	up	1.13138	0.178079	1.13138	up	-0.170984	-0.0106138	0.0556011	-0.00393839	0.00709457	71	Hs.514581	gb:NM_001614.2 /DB_XREF=gi:11038618 /GEN=ACTG1 /FEA=FLmRNA /CNT=466 /TID=Hs.14376.0 /TIER=FL+Stack /STK=97 /UG=Hs.14376 /LL=71 /DEF=Homo sapiens actin, gamma 1 (ACTG1), mRNA. /PROD=actin, gamma 1 propeptide /FL=gb:BC000292.1 gb:NM_001614.2
CATX-1	234705_at	0.0127476	1.11452	0.156419	1.11452	up	1.06359	0.0889409	1.06359	up	1.06344	0.0887451	1.06344	up	1.17849	0.236941	1.17849	up	-0.0872946	0.069124	0.00164627	0.00145044	0.149646	100506513	Hs.676466	gb:AF083117.1 /DB_XREF=gi:9789006 /GEN=CATX-1 /FEA=mRNA /CNT=1 /TID=Hs.283967.0 /TIER=ConsEnd /STK=0 /UG=Hs.283967 /DEF=Homo sapiens CATX-1 mRNA, partial cds. /PROD=unknown
SNX25	230066_at	0.0127597	1.04078	0.0576672	1.04078	up	1.10069	0.138406	1.10069	up	1.12105	0.164846	1.12105	up	1.17184	0.228779	1.17184	up	-0.0973795	-0.0397124	0.0410262	0.0674662	0.1314	83891	Hs.369091	gb:AW134876 /DB_XREF=gi:6138422 /DB_XREF=UI-H-BI1-abs-h-07-0-UI.s1 /CLONE=IMAGE:2713188 /FEA=EST /CNT=35 /TID=Hs.236510.2 /TIER=Stack /STK=8 /UG=Hs.236510 /LL=55858 /UG_GENE=LOC55858 /UG_TITLE=uncharacterized hypothalamus protein HTMP
MDC1	203061_s_at	0.0127705	-1.17617	-0.2341	1.17617	down	-1.26036	-0.333831	1.26036	down	-1.25657	-0.32949	1.25657	down	-1.24299	-0.313816	1.24299	down	0.279558	0.0454577	-0.0542731	-0.0499325	-0.0342577	9656	Hs.653495	gb:AI673553 /DB_XREF=gi:4853284 /DB_XREF=we75d11.x1 /CLONE=IMAGE:2346933 /FEA=FLmRNA /CNT=104 /TID=Hs.277585.0 /TIER=Stack /STK=13 /UG=Hs.277585 /LL=9656 /UG_GENE=KIAA0170 /UG_TITLE=KIAA0170 gene product /FL=gb:NM_014641.1 gb:D79992.1
FAHD2A	235418_at	0.0127715	-1.0675	-0.0942391	1.0675	down	-1.05597	-0.0785649	1.05597	down	-1.14466	-0.194922	1.14466	down	-1.0264	-0.0375899	1.0264	down	0.0847113	-0.00952779	0.00614648	-0.11021	0.0471214	51011	Hs.531247	gb:H04799 /DB_XREF=gi:868351 /DB_XREF=yl74c06.s1 /CLONE=IMAGE:43844 /FEA=EST /CNT=16 /TID=Hs.12397.0 /TIER=ConsEnd /STK=6 /UG=Hs.12397 /UG_TITLE=ESTs
STON1	231795_at	0.0127768	1.14176	0.19126	1.14176	up	1.08768	0.121252	1.08768	up	1.10539	0.144558	1.10539	up	1.1972	0.259665	1.1972	up	-0.107325	0.0839349	0.0139272	0.0372329	0.15234	11037	Hs.732016	gb:BG289281 /DB_XREF=gi:13044966 /DB_XREF=602384290F1 /CLONE=IMAGE:4513127 /FEA=FLmRNA /CNT=9 /TID=Hs.54961.1 /TIER=ConsEnd /STK=0 /UG=Hs.54961 /LL=11037 /UG_GENE=SALF /UG_TITLE=stoned BTFIIA-alphabeta-like factor /FL=gb:AY026319.1
NAV3	204823_at	0.012797	1.09676	0.133242	1.09676	up	1.3882	0.473219	1.3882	up	1.31278	0.392623	1.31278	up	1.32014	0.400689	1.32014	up	-0.198698	-0.0654563	0.274521	0.193925	0.201991	89795	Hs.655301	gb:NM_014903.1 /DB_XREF=gi:7662389 /GEN=KIAA0938 /FEA=FLmRNA /CNT=57 /TID=Hs.174188.0 /TIER=FL+Stack /STK=20 /UG=Hs.174188 /LL=22840 /DEF=Homo sapiens KIAA0938 protein (KIAA0938), mRNA. /PROD=KIAA0938 protein /FL=gb:AB023155.1 gb:NM_014903.1
CEP95	223815_at	0.0127985	-1.07145	-0.099558	1.07145	down	-1.11734	-0.160071	1.11734	down	-1.15718	-0.210616	1.15718	down	-1.19993	-0.262956	1.19993	down	0.166748	0.0671902	0.00667712	-0.0438678	-0.0962077	90799	Hs.569713	gb:AF130069.1 /DB_XREF=gi:11493444 /FEA=FLmRNA /CNT=7 /TID=Hs.135265.0 /TIER=FL /STK=0 /UG=Hs.135265 /DEF=Homo sapiens clone FLB8436 PRO2277 mRNA, complete cds. /PROD=PRO2277 /FL=gb:AF130069.1
FGD4	242445_at	0.0128003	1.86991	0.902972	1.86991	up	2.14091	1.09823	2.14091	up	1.48631	0.571734	1.48631	up	1.54242	0.625191	1.54242	up	-0.717837	0.185135	0.380389	-0.146103	-0.092646	121512	Hs.117835	gb:AA296351 /DB_XREF=gi:1948706 /DB_XREF=EST10852 /FEA=EST /CNT=7 /TID=Hs.154263.0 /TIER=ConsEnd /STK=0 /UG=Hs.154263 /UG_TITLE=ESTs
	233579_at	0.012809	1.03616	0.0512518	1.03616	up	1.16118	0.21559	1.16118	up	1.07443	0.103566	1.07443	up	1.00197	0.00283892	1.00197	up	-0.0659513	-0.0146994	0.149639	0.037615	-0.0631124		Hs.649988	gb:AK026402.1 /DB_XREF=gi:10439255 /FEA=mRNA /CNT=2 /TID=Hs.288999.0 /TIER=ConsEnd /STK=0 /UG=Hs.288999 /UG_TITLE=Homo sapiens cDNA: FLJ22749 fis, clone KAIA0458 /DEF=Homo sapiens cDNA: FLJ22749 fis, clone KAIA0458.
FGFR2	208228_s_at	0.0128369	-1.11685	-0.159439	1.11685	down	-1.08085	-0.11217	1.08085	down	1.02725	0.0387852	1.02725	up	-1.06206	-0.0868676	1.06206	down	0.0694534	-0.0899852	-0.0427161	0.108239	-0.0174141	2263	Hs.533683	gb:M87771.1 /DB_XREF=gi:186781 /GEN=K-sam-III /FEA=FLmRNA /CNT=2 /TID=Hs.278581.4 /TIER=FL /STK=0 /UG=Hs.278581 /LL=2263 /DEF=Human secreted fibroblast growth factor receptor (K-sam-III) mRNA, complete cds. /PROD=fibroblast growth factor receptor /FL=gb:M87771.1 gb:NM_022970.1
LOC100506403///RUNX1	211620_x_at	0.0128412	1.23977	0.310074	1.23977	up	1.10264	0.140968	1.10264	up	1.04155	0.0587376	1.04155	up	1.07441	0.103547	1.07441	up	-0.0963071	0.213767	0.0446612	-0.0375695	0.0072401	861///100506403	Hs.149261	gb:L21756.1 /DB_XREF=gi:400340 /GEN=AML1EAP /FEA=FLmRNA /CNT=1 /TID=HsAffx.900361.669 /TIER=FL /STK=0 /DEF=Homo sapiens acute myeloid leukemia associated protein (AML1EAP) mRNA, complete cds. /FL=gb:L21756.1
LOC101928317	240893_at	0.012846	1.046	0.0648803	1.046	up	1.06164	0.0862908	1.06164	up	1.10543	0.144612	1.10543	up	1.09454	0.13033	1.09454	up	-0.0720789	-0.0071986	0.0142119	0.0725333	0.0582511	101928317		gb:AA437213 /DB_XREF=gi:2142127 /DB_XREF=zv54a08.s1 /CLONE=IMAGE:757430 /FEA=EST /CNT=5 /TID=Hs.98942.0 /TIER=ConsEnd /STK=4 /UG=Hs.98942 /UG_TITLE=ESTs
C5orf63	244761_at	0.0128583	-1.12812	-0.173923	1.12812	down	-1.16289	-0.217712	1.16289	down	-1.14141	-0.190816	1.14141	down	-1.12902	-0.175072	1.12902	down	0.161674	-0.0122489	-0.0560377	-0.0291414	-0.0133973	401207	Hs.49573	gb:BE674694 /DB_XREF=gi:10035316 /DB_XREF=7e94d01.x1 /CLONE=IMAGE:3292801 /FEA=EST /CNT=3 /TID=Hs.270630.0 /TIER=ConsEnd /STK=3 /UG=Hs.270630 /UG_TITLE=ESTs
GNA11	204248_at	0.0128709	-1.08439	-0.116879	1.08439	down	-1.16343	-0.218385	1.16343	down	-1.20445	-0.26837	1.20445	down	-1.02381	-0.0339516	1.02381	down	0.134385	0.0175056	-0.0840003	-0.133985	0.100433	2767	Hs.650575	gb:NM_002067.1 /DB_XREF=gi:4504036 /GEN=GNA11 /FEA=FLmRNA /CNT=74 /TID=Hs.1686.0 /TIER=FL+Stack /STK=31 /UG=Hs.1686 /LL=2767 /DEF=Homo sapiens guanine nucleotide binding protein (G protein), alpha 11 (Gq class) (GNA11), mRNA. /PROD=guanine nucleotide binding protein (G protein),alpha 11 (Gq class) /FL=gb:NM_002067.1 gb:AF011497.1 gb:M69013.1
TRIB1	239818_x_at	0.0128754	2.37173	1.24594	2.37173	up	2.41646	1.27289	2.41646	up	1.92846	0.947449	1.92846	up	1.74021	0.79926	1.74021	up	-0.911182	0.33476	0.361712	0.0362668	-0.111922	10221	Hs.444947	gb:AA576947 /DB_XREF=gi:2354421 /DB_XREF=nm82b04.s1 /CLONE=IMAGE:1074703 /FEA=EST /CNT=4 /TID=Hs.188886.0 /TIER=ConsEnd /STK=4 /UG=Hs.188886 /UG_TITLE=ESTs
	241207_at	0.0128774	1.07731	0.107431	1.07731	up	1.03049	0.0433333	1.03049	up	-1.00748	-0.0107566	1.00748	down	1.06539	0.0913756	1.06539	up	-0.031706	0.075725	0.0116273	-0.0424626	0.0596696		Hs.662725	gb:AI276780 /DB_XREF=gi:3899054 /DB_XREF=ql64h12.x1 /CLONE=IMAGE:1877159 /FEA=EST /CNT=4 /TID=Hs.135173.0 /TIER=ConsEnd /STK=4 /UG=Hs.135173 /UG_TITLE=ESTs
COX19	231831_at	0.0129111	-1.19336	-0.255033	1.19336	down	-1.18093	-0.239922	1.18093	down	-1.13497	-0.18266	1.13497	down	-1.18676	-0.247031	1.18676	down	0.198371	-0.0566626	-0.0415515	0.0157107	-0.0486604	90639	Hs.121593	gb:AU153267 /DB_XREF=gi:11014788 /DB_XREF=AU153267 /CLONE=NT2RP3002763 /FEA=mRNA /CNT=34 /TID=Hs.121593.0 /TIER=ConsEnd /STK=2 /UG=Hs.121593 /UG_TITLE=Homo sapiens cDNA FLJ13123 fis, clone NT2RP3002763
SDHC	202004_x_at	0.0129171	1.36215	0.445881	1.36215	up	1.40769	0.493333	1.40769	up	1.2986	0.376962	1.2986	up	1.44649	0.53256	1.44649	up	-0.374158	0.0717221	0.119175	0.00280369	0.158401	6391	Hs.444472	gb:NM_003001.2 /DB_XREF=gi:9257243 /GEN=SDHC /FEA=FLmRNA /CNT=212 /TID=Hs.3577.0 /TIER=FL+Stack /STK=137 /UG=Hs.3577 /LL=6391 /DEF=Homo sapiens succinate dehydrogenase complex, subunit C, integral membrane protein, 15kD (SDHC), nuclear gene encoding mitochondrial protein, mRNA. /PROD=succinate dehydrogenase complex, subunit Cprecursor /FL=gb:NM_003001.2 gb:U57877.1
BROX	239078_at	0.0129227	1.24522	0.316402	1.24522	up	1.31914	0.399601	1.31914	up	1.4745	0.560228	1.4745	up	1.48481	0.570277	1.48481	up	-0.369417	-0.0530147	0.0301842	0.190811	0.20086	148362	Hs.552608	gb:BG500291 /DB_XREF=gi:13461808 /DB_XREF=602546955F1 /CLONE=IMAGE:4669260 /FEA=EST /CNT=8 /TID=Hs.125594.0 /TIER=ConsEnd /STK=0 /UG=Hs.125594 /UG_TITLE=ESTs, Weakly similar to B0507.2 gene product (C.elegans)
KIAA1033	212795_at	0.0129329	-1.01174	-0.0168408	1.01174	down	1.1769	0.234992	1.1769	up	1.04545	0.0641184	1.04545	up	-1.14118	-0.190522	1.14118	down	-0.0756634	-0.0925043	0.159329	-0.011545	-0.266186	23325	Hs.12144	gb:AL137753.1 /DB_XREF=gi:6808455 /FEA=mRNA /CNT=105 /TID=Hs.12144.0 /TIER=Stack /STK=24 /UG=Hs.12144 /LL=23325 /UG_GENE=KIAA1033 /UG_TITLE=KIAA1033 protein /DEF=Homo sapiens mRNA; cDNA DKFZp434K1412 (from clone DKFZp434K1412).
PON1	206344_at	0.0129498	-1.00473	-0.00680218	1.00473	down	1.08796	0.121629	1.08796	up	-1.01347	-0.0193021	1.01347	down	-1.04145	-0.0585969	1.04145	down	-0.0159256	-0.0227278	0.105703	-0.0352277	-0.0745225	5444	Hs.370995	gb:U53784.1 /DB_XREF=gi:1280040 /FEA=FLmRNA /CNT=30 /TID=Hs.1898.0 /TIER=FL /STK=0 /UG=Hs.1898 /LL=5444 /UG_GENE=PON1 /DEF=Human serum aryldialkylphosphatase precursor mRNA, complete cds. /PROD=serum aryldialkylphosphatase precursor /FL=gb:D84371.1 gb:U53784.1 gb:NM_000446.1 gb:M63012.1
	1563797_at	0.0129614	1.03387	0.0480584	1.03387	up	1.0462	0.0651553	1.0462	up	1.10804	0.148006	1.10804	up	1.04641	0.0654436	1.04641	up	-0.0642041	-0.0161457	0.000951197	0.0838019	0.00123951		Hs.681798	gb:AK074310.1 /DB_XREF=gi:18676877 /TID=Hs2.352654.1 /CNT=1 /FEA=mRNA /TIER=ConsEnd /STK=0 /UG=Hs.352654 /UG_TITLE=Homo sapiens cDNA FLJ23730 fis, clone HEP14530. /DEF=Homo sapiens cDNA FLJ23730 fis, clone HEP14530.
	1556852_a_at	0.0129626	1.03165	0.0449497	1.03165	up	1.05047	0.0710387	1.05047	up	1.08891	0.122882	1.08891	up	1.25645	0.32935	1.25645	up	-0.0693679	-0.0244182	0.00167073	0.0535145	0.259982		Hs.636545	gb:BE222476 /DB_XREF=gi:8909794 /DB_XREF=hv91f02.x1 /CLONE=IMAGE:3180795 /TID=Hs2.283188.1 /CNT=5 /FEA=mRNA /TIER=ConsEnd /STK=2 /UG=Hs.283188 /UG_TITLE=Homo sapiens cDNA FLJ33171 fis, clone ADRGL2000644.
AGFG2	222126_at	0.0130204	-1.05842	-0.0819114	1.05842	down	-1.22641	-0.294445	1.22641	down	-1.09693	-0.133476	1.09693	down	-1.03668	-0.0519717	1.03668	down	0.126354	0.0444427	-0.168091	-0.00712243	0.0743823	3268	Hs.521083	gb:AI247494 /DB_XREF=gi:3842891 /DB_XREF=qh56e02.x1 /CLONE=IMAGE:1848698 /FEA=DNA_7 /CNT=20 /TID=Hs.251678.0 /TIER=ConsEnd /STK=3 /UG=Hs.251678 /LL=3268 /UG_GENE=HRBL /UG_TITLE=HIV-1 Rev binding protein-like
	1564154_at	0.013072	-1.47286	-0.558621	1.47286	down	-1.5562	-0.638031	1.5562	down	-1.27523	-0.350754	1.27523	down	-1.27336	-0.348645	1.27336	down	0.433013	-0.125608	-0.205018	0.0822593	0.0843678			gb:BC041466.1 /DB_XREF=gi:27370761 /TID=Hs2.434445.1 /CNT=1 /FEA=mRNA /TIER=ConsEnd /STK=0 /UG=Hs.434445 /UG_TITLE=Homo sapiens, clone IMAGE:5213841, mRNA /DEF=Homo sapiens, clone IMAGE:5213841, mRNA.
FUNDC2	230922_x_at	0.0130953	1.02293	0.0327004	1.02293	up	1.15286	0.205222	1.15286	up	-1.02403	-0.0342604	1.02403	down	-1.07022	-0.0979113	1.07022	down	0.0313188	0.0640192	0.236541	-0.00294169	-0.0665925	65991		gb:H09739 /DB_XREF=gi:874561 /DB_XREF=ym01a03.s1 /CLONE=IMAGE:46241 /FEA=EST /CNT=8 /TID=Hs.6917.0 /TIER=Stack /STK=8 /UG=Hs.6917 /UG_TITLE=ESTs
	215397_x_at	0.0130966	1.06426	0.0898491	1.06426	up	1.12012	0.163655	1.12012	up	1.00654	0.00940927	1.00654	up	-1.03439	-0.0487747	1.03439	down	-0.00908211	0.080767	0.154573	0.000327166	-0.0578568		Hs.661288	gb:AU148086 /DB_XREF=gi:11009607 /DB_XREF=AU148086 /CLONE=MAMMA1002554 /FEA=mRNA /CNT=5 /TID=Hs.302691.0 /TIER=ConsEnd /STK=1 /UG=Hs.302691 /UG_TITLE=Homo sapiens cDNA FLJ12379 fis, clone MAMMA1002554
STAG2	207983_s_at	0.0131129	1.00834	0.0119868	1.00834	up	1.21278	0.278321	1.21278	up	1.16899	0.225268	1.16899	up	1.00452	0.0065041	1.00452	up	-0.0941141	-0.0821272	0.184206	0.131154	-0.08761	10735	Hs.496710	gb:NM_006603.1 /DB_XREF=gi:5730068 /GEN=STAG2 /FEA=FLmRNA /CNT=2 /TID=Hs.8217.0 /TIER=FL /STK=0 /UG=Hs.8217 /LL=10735 /DEF=Homo sapiens stromal antigen 2 (STAG2), mRNA. /PROD=stromal antigen 2 /FL=gb:NM_006603.1
DDX49	232915_at	0.0131309	1.02401	0.0342343	1.02401	up	-1.00305	-0.00439526	1.00305	down	-1.13158	-0.178338	1.13158	down	-1.15198	-0.20412	1.15198	down	0.0849866	0.119221	0.0805913	-0.0933512	-0.119133	54555		gb:AW571715 /DB_XREF=gi:7236534 /DB_XREF=xx38g03.x1 /CLONE=IMAGE:2839828 /FEA=mRNA /CNT=5 /TID=Hs.180477.0 /TIER=ConsEnd /STK=1 /UG=Hs.180477 /UG_TITLE=Homo sapiens mRNA; cDNA DKFZp564C0716 (from clone DKFZp564C0716)
C6orf99	230487_at	0.0131401	1.12803	0.173801	1.12803	up	1.04129	0.0583688	1.04129	up	1.02152	0.0307173	1.02152	up	1.12088	0.164628	1.12088	up	-0.0589132	0.114888	-0.000544402	-0.0281959	0.105715	100130967	Hs.32804	gb:AA776715 /DB_XREF=gi:2836049 /DB_XREF=ah49d04.s1 /CLONE=1292839 /FEA=EST /CNT=35 /TID=Hs.103014.0 /TIER=Stack /STK=29 /UG=Hs.103014 /UG_TITLE=ESTs
LOC101927055///TTN-AS1	242679_at	0.0131572	1.45663	0.542637	1.45663	up	1.94096	0.95677	1.94096	up	1.59898	0.677154	1.59898	up	1.48215	0.567687	1.48215	up	-0.542496	0.000140985	0.414275	0.134659	0.0251917	100506866///101927055	Hs.710694	gb:AU127120 /DB_XREF=gi:10951836 /DB_XREF=AU127120 /CLONE=NT2RP2000623 /FEA=EST /CNT=5 /TID=Hs.229885.0 /TIER=ConsEnd /STK=0 /UG=Hs.229885 /UG_TITLE=ESTs, Moderately similar to I38344 titin, cardiac muscle (H.sapiens)
CBL	206607_at	0.0131764	1.20321	0.266888	1.20321	up	1.40728	0.49291	1.40728	up	1.28137	0.357689	1.28137	up	1.41927	0.505152	1.41927	up	-0.345988	-0.0791007	0.146922	0.0117011	0.159164	867	Hs.504096	gb:NM_005188.1 /DB_XREF=gi:4885116 /GEN=CBL /FEA=FLmRNA /CNT=14 /TID=Hs.99980.0 /TIER=FL /STK=0 /UG=Hs.99980 /LL=867 /DEF=Homo sapiens Cas-Br-M (murine) ecotropic retroviral transforming sequence (CBL), mRNA. /PROD=Cas-Br-M (murine) ecotropic retroviraltransforming sequence /FL=gb:NM_005188.1
ORAOV1	228676_at	0.0131924	-1.1974	-0.259905	1.1974	down	-1.14082	-0.190067	1.14082	down	-1.1631	-0.21797	1.1631	down	-1.19258	-0.254089	1.19258	down	0.194432	-0.0654731	0.0043646	-0.0235376	-0.0596576	220064	Hs.667996	gb:AA204688 /DB_XREF=gi:1802539 /DB_XREF=zr87d12.r1 /CLONE=IMAGE:682679 /FEA=EST /CNT=16 /TID=Hs.136201.0 /TIER=Stack /STK=14 /UG=Hs.136201 /UG_TITLE=ESTs, Weakly similar to ALU7_HUMAN ALU SUBFAMILY SQ SEQUENCE CONTAMINATION WARNING ENTRY (H.sapiens)
BAGE	207712_at	0.0132494	1.05581	0.0783451	1.05581	up	1.13866	0.187338	1.13866	up	1.0888	0.122738	1.0888	up	1.0543	0.0762874	1.0543	up	-0.0727992	0.00554585	0.114539	0.0499392	0.00348814	574	Hs.545789	gb:NM_001187.1 /DB_XREF=gi:4557346 /GEN=BAGE /FEA=FLmRNA /CNT=3 /TID=Hs.2355.0 /TIER=FL /STK=0 /UG=Hs.2355 /LL=574 /DEF=Homo sapiens B melanoma antigen (BAGE), mRNA. /PROD=B melanoma antigen /FL=gb:U19180.1 gb:NM_001187.1
	1567035_at	0.013253	-1.0095	-0.0136441	1.0095	down	1.17538	0.23313	1.17538	up	1.19246	0.253946	1.19246	up	1.07134	0.0994176	1.07134	up	-0.119069	-0.132713	0.114061	0.134877	-0.0196515			gb:U63828.1 /DB_XREF=gi:1515451 /TID=Hs2.381356.1 /CNT=1 /FEA=mRNA /TIER=ConsEnd /STK=0 /LL=140843 /UG_GENE=C20orf181 /UG=Hs.381356 /UG_TITLE=chromosome 20 open reading frame 181 /DEF=Human tissue plasminogen activator mRNA, partial cds.
CAV1	203065_s_at	0.0132611	1.15135	0.203323	1.15135	up	1.00657	0.00945039	1.00657	up	1.17697	0.235079	1.17697	up	1.30952	0.38904	1.30952	up	-0.0662608	0.137062	-0.0568105	0.168818	0.322779	857	Hs.74034	gb:NM_001753.2 /DB_XREF=gi:4580417 /GEN=CAV1 /FEA=FLmRNA /CNT=151 /TID=Hs.323469.0 /TIER=FL /STK=1 /UG=Hs.323469 /LL=857 /DEF=Homo sapiens caveolin 1, caveolae protein, 22kD (CAV1), mRNA. /PROD=caveolin 1 /FL=gb:NM_001753.2
PCK1	208383_s_at	0.0132707	1.09175	0.126642	1.09175	up	1.07242	0.100868	1.07242	up	1.09749	0.134201	1.09749	up	1.195	0.257008	1.195	up	-0.0870167	0.0396252	0.0138512	0.0471848	0.169992	5105	Hs.1872	gb:NM_002591.1 /DB_XREF=gi:4505638 /GEN=PCK1 /FEA=FLmRNA /CNT=2 /TID=Hs.1872.0 /TIER=FL /STK=0 /UG=Hs.1872 /LL=5105 /DEF=Homo sapiens phosphoenolpyruvate carboxykinase 1 (soluble) (PCK1), mRNA. /PROD=phosphoenolpyruvate carboxykinase 1 (soluble) /FL=gb:NM_002591.1 gb:L05144.1
RAB27A	235766_x_at	0.013277	1.47853	0.56416	1.47853	up	1.74845	0.806073	1.74845	up	1.4132	0.498961	1.4132	up	1.12087	0.164625	1.12087	up	-0.513666	0.0504946	0.292407	-0.0147045	-0.349041	5873	Hs.626665///Hs.654978	gb:AA743462 /DB_XREF=gi:2782968 /DB_XREF=ny19c07.s1 /CLONE=IMAGE:1272204 /FEA=EST /CNT=7 /TID=Hs.165337.1 /TIER=ConsEnd /STK=5 /UG=Hs.165337 /UG_TITLE=ESTs
SURF6	225038_s_at	0.0132963	-1.11989	-0.163357	1.11989	down	-1.14459	-0.194834	1.14459	down	-1.27305	-0.348293	1.27305	down	-1.14816	-0.199325	1.14816	down	0.192668	0.0293111	-0.00216582	-0.155625	-0.00665712	6838	Hs.274430	gb:AI745183 /DB_XREF=gi:5113471 /DB_XREF=wg10a02.x1 /CLONE=IMAGE:2364650 /FEA=FLmRNA /CNT=95 /TID=Hs.274430.0 /TIER=Stack /STK=17 /UG=Hs.274430 /LL=6838 /UG_GENE=SURF6 /UG_TITLE=surfeit 6 /FL=gb:NM_006753.1
ERI2	240604_at	0.0133059	1.04077	0.0576474	1.04077	up	1.04704	0.0663177	1.04704	up	1.04133	0.0584221	1.04133	up	1.13638	0.184449	1.13638	up	-0.0565395	0.00110793	0.00977826	0.00188261	0.12791	112479	Hs.248437	gb:AI688141 /DB_XREF=gi:4899435 /DB_XREF=wa83h03.x1 /CLONE=IMAGE:2302805 /FEA=EST /CNT=6 /TID=Hs.144037.0 /TIER=ConsEnd /STK=4 /UG=Hs.144037 /UG_TITLE=ESTs
KRI1	218798_at	0.0133095	-1.27613	-0.35178	1.27613	down	-1.32925	-0.41061	1.32925	down	-1.28076	-0.357003	1.28076	down	-1.18483	-0.244684	1.18483	down	0.242744	-0.109037	-0.167867	-0.114259	-0.00194016	65095	Hs.709967	gb:NM_023008.1 /DB_XREF=gi:12711671 /GEN=FLJ12949 /FEA=FLmRNA /CNT=66 /TID=Hs.184519.0 /TIER=FL /STK=5 /UG=Hs.184519 /LL=65095 /DEF=Homo sapiens hypothetical protein FLJ12949 (FLJ12949), mRNA. /PROD=hypothetical protein FLJ12949 /FL=gb:BC002890.1 gb:NM_023008.1
RNF220	219988_s_at	0.0133299	-1.28504	-0.361816	1.28504	down	-1.22489	-0.292648	1.22489	down	-1.21388	-0.279621	1.21388	down	-1.18628	-0.246444	1.18628	down	0.207784	-0.154032	-0.0848635	-0.0718361	-0.0386593	55182	Hs.456557	gb:NM_018150.1 /DB_XREF=gi:8922541 /GEN=FLJ10597 /FEA=FLmRNA /CNT=15 /TID=Hs.90375.0 /TIER=FL /STK=0 /UG=Hs.90375 /LL=55182 /DEF=Homo sapiens hypothetical protein FLJ10597 (FLJ10597), mRNA. /PROD=hypothetical protein FLJ10597 /FL=gb:NM_018150.1
PROCR	203650_at	0.0133377	1.00163	0.00234827	1.00163	up	-1.07377	-0.102689	1.07377	down	-1.07828	-0.108736	1.07828	down	-1.13348	-0.180762	1.13348	down	0.0770384	0.0793867	-0.0256505	-0.0316972	-0.103724	10544	Hs.647450	gb:NM_006404.1 /DB_XREF=gi:5453645 /GEN=PROCR /FEA=FLmRNA /CNT=122 /TID=Hs.82353.0 /TIER=FL+Stack /STK=28 /UG=Hs.82353 /LL=10544 /DEF=Homo sapiens protein C receptor, endothelial (EPCR) (PROCR), mRNA. /PROD=protein C receptor, endothelial (EPCR) /FL=gb:L35545.1 gb:NM_006404.1
FLJ34503	1553448_at	0.0133653	1.02141	0.0305686	1.02141	up	1.09135	0.126111	1.09135	up	-1.00929	-0.0133385	1.00929	down	-1.00799	-0.0114828	1.00799	down	-0.024875	0.00569365	0.101236	-0.0382135	-0.0363578	285759	Hs.376634	gb:NM_173673.1 /DB_XREF=gi:27735001 /TID=Hs2.376634.1 /CNT=2 /FEA=FLmRNA /TIER=FL /STK=1 /LL=285759 /UG_GENE=FLJ34503 /UG=Hs.376634 /UG_TITLE=hypothetical protein FLJ34503 /DEF=Homo sapiens hypothetical protein FLJ34503 (FLJ34503), mRNA. /FL=gb:NM_173673.1
	1561293_at	0.0134057	1.02148	0.0306633	1.02148	up	1.11123	0.152154	1.11123	up	1.134	0.181415	1.134	up	1.1189	0.162087	1.1189	up	-0.112807	-0.0821435	0.0393475	0.0686083	0.0492799		Hs.561722	gb:BC043260.1 /DB_XREF=gi:27695858 /TID=Hs2.434165.1 /CNT=2 /FEA=mRNA /TIER=ConsEnd /STK=1 /UG=Hs.434165 /UG_TITLE=Homo sapiens, clone IMAGE:5296640, mRNA /DEF=Homo sapiens, clone IMAGE:5296640, mRNA.
LAMP1	201551_s_at	0.0134156	1.48884	0.574186	1.48884	up	1.50301	0.587853	1.50301	up	1.37468	0.459098	1.37468	up	1.41966	0.505543	1.41966	up	-0.435449	0.138737	0.152404	0.0236492	0.0700941	3916	Hs.494419	gb:J03263.1 /DB_XREF=gi:187178 /GEN=LAMP1 /FEA=FLmRNA /CNT=239 /TID=Hs.150101.0 /TIER=FL /STK=0 /UG=Hs.150101 /LL=3916 /UG_TITLE=lysosomal-associated membrane protein 1 /DEF=Human lysosome-associated membrane glycoprotein (lamp A) mRNA, complete cds. /FL=gb:J04182.1 gb:J03263.1 gb:NM_005561.2
NME8	220384_at	0.0134238	1.44103	0.5271	1.44103	up	1.81075	0.856591	1.81075	up	1.70823	0.7725	1.70823	up	1.35179	0.434875	1.35179	up	-0.540506	-0.013406	0.316085	0.231994	-0.105631	51314	Hs.723454	gb:NM_016616.1 /DB_XREF=gi:7706153 /GEN=LOC51314 /FEA=FLmRNA /CNT=6 /TID=Hs.134079.0 /TIER=FL /STK=2 /UG=Hs.134079 /LL=51314 /DEF=Homo sapiens NM23-H8 (LOC51314), mRNA. /PROD=NM23-H8 /FL=gb:NM_016616.1 gb:AF202051.2
	215595_x_at	0.0134624	-1.07136	-0.099445	1.07136	down	1.0613	0.0858385	1.0613	up	-1.06568	-0.0917755	1.06568	down	-1.09486	-0.130748	1.09486	down	0.0379716	-0.0614734	0.12381	-0.0538039	-0.0927761		Hs.656383	gb:AK023918.1 /DB_XREF=gi:10436003 /FEA=mRNA /CNT=3 /TID=Hs.288489.0 /TIER=ConsEnd /STK=0 /UG=Hs.288489 /UG_TITLE=Homo sapiens cDNA FLJ13856 fis, clone THYRO1000988 /DEF=Homo sapiens cDNA FLJ13856 fis, clone THYRO1000988.
ZNF540	238454_at	0.0134705	-1.13508	-0.1828	1.13508	down	-1.27667	-0.352382	1.27667	down	-1.16755	-0.223486	1.16755	down	-1.17619	-0.234116	1.17619	down	0.219468	0.0366681	-0.132914	-0.00401817	-0.0146472	163255	Hs.728927	gb:AA013398 /DB_XREF=gi:1474434 /DB_XREF=ze28d11.s1 /CLONE=IMAGE:360309 /FEA=EST /CNT=12 /TID=Hs.116368.0 /TIER=ConsEnd /STK=4 /UG=Hs.116368 /UG_TITLE=ESTs, Weakly similar to Y961_HUMAN HYPOTHETICAL ZINC FINGER PROTEIN KIAA0961 (H.sapiens)
AMDHD1	229596_at	0.0135148	-1.30754	-0.386854	1.30754	down	-1.21415	-0.279946	1.21415	down	-1.26754	-0.342034	1.26754	down	-1.28004	-0.356189	1.28004	down	0.322674	-0.0641801	0.0427284	-0.0193599	-0.0335149	144193	Hs.424907	gb:AW271617 /DB_XREF=gi:6658647 /DB_XREF=xs16d05.x1 /CLONE=IMAGE:2769801 /FEA=EST /CNT=23 /TID=Hs.84507.0 /TIER=Stack /STK=19 /UG=Hs.84507 /UG_TITLE=ESTs, Weakly similar to T34352 hypothetical protein T12A2.1 - Caenorhabditis elegans (C.elegans)
	242371_x_at	0.0135287	1.05339	0.0750329	1.05339	up	1.14961	0.20114	1.14961	up	1.06321	0.088423	1.06321	up	1.02721	0.0387379	1.02721	up	-0.0760747	-0.00104178	0.125065	0.0123483	-0.0373368			gb:AW974747 /DB_XREF=gi:8165935 /DB_XREF=EST386837 /FEA=EST /CNT=5 /TID=Hs.270818.0 /TIER=ConsEnd /STK=0 /UG=Hs.270818 /UG_TITLE=ESTs, Moderately similar to ALU8_HUMAN ALU SUBFAMILY SX SEQUENCE CONTAMINATION WARNING ENTRY (H.sapiens)
ACTR3BP2	224424_x_at	0.0135322	1.01347	0.0192994	1.01347	up	1.18429	0.244028	1.18429	up	1.04684	0.066042	1.04684	up	-1.02645	-0.0376584	1.02645	down	-0.0249048	-0.00560538	0.219123	0.0411373	-0.0625631	440888		gb:AY026350.1 /DB_XREF=gi:13641050 /GEN=FKSG72 /FEA=FLmRNA /CNT=1 /TID=HsAffx.900665.649 /TIER=FL /STK=0 /DEF=Homo sapiens FKSG72 (FKSG72) mRNA, complete cds. /PROD=FKSG72 /FL=gb:AY026350.1
SAMD8	242062_at	0.0135363	1.38774	0.472739	1.38774	up	1.43704	0.523105	1.43704	up	1.48314	0.568656	1.48314	up	1.44452	0.530587	1.44452	up	-0.311169	0.16157	0.211936	0.257488	0.219418	142891	Hs.744986	gb:BE890410 /DB_XREF=gi:10348700 /DB_XREF=601431673F1 /CLONE=IMAGE:3916723 /FEA=EST /CNT=5 /TID=Hs.276755.0 /TIER=ConsEnd /STK=0 /UG=Hs.276755 /UG_TITLE=ESTs, Weakly similar to F53B1.2 (C.elegans)
ZFHX4	219779_at	0.0135384	1.02567	0.036565	1.02567	up	1.1232	0.167613	1.1232	up	1.10999	0.150551	1.10999	up	1.12349	0.167986	1.12349	up	-0.102591	-0.0660258	0.0650221	0.0479603	0.0653948	79776	Hs.458973	gb:NM_024721.1 /DB_XREF=gi:13376026 /GEN=FLJ20980 /FEA=FLmRNA /CNT=22 /TID=Hs.109314.0 /TIER=FL+Stack /STK=13 /UG=Hs.109314 /LL=79776 /DEF=Homo sapiens hypothetical protein FLJ20980 (FLJ20980), mRNA. /PROD=hypothetical protein FLJ20980 /FL=gb:NM_024721.1
	1570136_at	0.0135549	1.03771	0.0534067	1.03771	up	1.02903	0.0412819	1.02903	up	1.10334	0.141882	1.10334	up	1.06468	0.0904214	1.06468	up	-0.0593568	-0.00595016	-0.018075	0.0825254	0.0310646		Hs.684464	gb:BC020420.1 /DB_XREF=gi:18042989 /TID=Hs2.382863.1 /CNT=2 /FEA=mRNA /TIER=ConsEnd /STK=0 /UG=Hs.382863 /UG_TITLE=Homo sapiens, clone IMAGE:4179922, mRNA /DEF=Homo sapiens, clone IMAGE:4179922, mRNA.
GNB4	223488_s_at	0.013587	1.28869	0.365903	1.28869	up	1.35478	0.43806	1.35478	up	1.35377	0.436988	1.35377	up	1.41508	0.500886	1.41508	up	-0.327721	0.0381822	0.110339	0.109267	0.173165	59345	Hs.173030	gb:BC000873.1 /DB_XREF=gi:12654118 /FEA=FLmRNA /CNT=41 /TID=Hs.172654.0 /TIER=FL /STK=0 /UG=Hs.172654 /LL=59345 /UG_GENE=GNB4 /DEF=Homo sapiens, guanine nucleotide binding protein beta subunit 4, clone MGC:5262, mRNA, complete cds. /PROD=guanine nucleotide binding protein beta subunit4 /FL=gb:BC000873.1 gb:AF300648.1 gb:NM_021629.1
ZNF138	1559709_at	0.0135905	1.06194	0.0867016	1.06194	up	1.10304	0.14149	1.10304	up	1.03555	0.0503916	1.03555	up	1.06553	0.0915774	1.06553	up	-0.0660651	0.0206364	0.0754245	-0.0156735	0.0255123	7697	Hs.184080	gb:BC017945.1 /DB_XREF=gi:17389871 /TID=Hs2.381777.1 /CNT=4 /FEA=mRNA /TIER=ConsEnd /STK=0 /UG=Hs.381777 /UG_TITLE=Homo sapiens, clone IMAGE:4293510, mRNA, partial cds /DEF=Homo sapiens, clone IMAGE:4293510, mRNA, partial cds.
FBXO44	223517_at	0.0135906	-1.23463	-0.304079	1.23463	down	-1.21718	-0.283548	1.21718	down	-1.279	-0.355019	1.279	down	-1.3001	-0.378622	1.3001	down	0.331437	0.0273585	0.0478894	-0.0235817	-0.0471844	93611	Hs.556006	gb:AV722616 /DB_XREF=gi:10825283 /DB_XREF=AV722616 /CLONE=HTBBDE11 /FEA=FLmRNA /CNT=32 /TID=Hs.321687.0 /TIER=Stack /STK=16 /UG=Hs.321687 /UG_TITLE=Homo sapiens F-box protein FBX30 mRNA, complete cds /FL=gb:AY007380.1
	1557519_at	0.0135918	1.14162	0.191086	1.14162	up	1.12695	0.172425	1.12695	up	1.07683	0.106791	1.07683	up	1.079	0.109689	1.079	up	-0.105141	0.0859442	0.067284	0.00164932	0.004548		Hs.621497	gb:AF075106.1 /DB_XREF=gi:3377647 /TID=Hs2.384698.1 /CNT=4 /FEA=mRNA /TIER=ConsEnd /STK=1 /UG=Hs.384698 /UG_TITLE=Homo sapiens full length insert cDNA YU10E03 /DEF=Homo sapiens full length insert cDNA YU10E03.
CROCC	206274_s_at	0.0136469	-1.17103	-0.227779	1.17103	down	-1.22624	-0.294243	1.22624	down	-1.14889	-0.200237	1.14889	down	-1.1104	-0.151074	1.1104	down	0.19552	-0.0322585	-0.0987222	-0.0047164	0.0444464	9696	Hs.309403	gb:NM_014675.1 /DB_XREF=gi:7662131 /GEN=KIAA0445 /FEA=FLmRNA /CNT=15 /TID=Hs.301065.0 /TIER=FL+Stack /STK=8 /UG=Hs.301065 /LL=9696 /DEF=Homo sapiens KIAA0445 gene product (KIAA0445), mRNA. /PROD=KIAA0445 gene product /FL=gb:AB007914.1 gb:NM_014675.1
MMAB	225826_at	0.0136749	-1.14626	-0.196935	1.14626	down	-1.2324	-0.301471	1.2324	down	-1.19232	-0.253777	1.19232	down	-1.04471	-0.0630967	1.04471	down	0.198609	0.00167396	-0.102862	-0.0551683	0.135512	326625	Hs.12106	gb:AV702487 /DB_XREF=gi:10718817 /DB_XREF=AV702487 /CLONE=ADBCQH09 /FEA=mRNA /CNT=64 /TID=Hs.12106.0 /TIER=Stack /STK=32 /UG=Hs.12106 /UG_TITLE=Homo sapiens, clone IMAGE:2822202, mRNA, partial cds
SRRT	222046_at	0.0136826	-1.1019	-0.139992	1.1019	down	-1.07293	-0.10155	1.07293	down	-1.13878	-0.187484	1.13878	down	-1.20242	-0.265941	1.20242	down	0.113751	-0.0262414	0.0122006	-0.0737329	-0.15219	51593	Hs.111801	gb:AI523895 /DB_XREF=gi:4438030 /DB_XREF=tg97g03.x1 /CLONE=IMAGE:2116756 /FEA=EST /CNT=12 /TID=Hs.111801.2 /TIER=Stack /STK=8 /UG=Hs.111801 /LL=51593 /UG_GENE=ARS2 /UG_TITLE=arsenate resistance protein ARS2
APPBP2	215402_at	0.0136903	-1.14174	-0.191234	1.14174	down	-1.14978	-0.20136	1.14978	down	-1.11149	-0.152498	1.11149	down	-1.16566	-0.221149	1.16566	down	0.16641	-0.0248237	-0.0349496	0.0139121	-0.0547387	10513		gb:AL157428.1 /DB_XREF=gi:7018458 /FEA=mRNA /CNT=4 /TID=Hs.306479.0 /TIER=ConsEnd /STK=0 /UG=Hs.306479 /UG_TITLE=Homo sapiens mRNA; cDNA DKFZp761F152 (from clone DKFZp761F152) /DEF=Homo sapiens mRNA; cDNA DKFZp761F152 (from clone DKFZp761F152).
LIG4	206235_at	0.0137039	1.09062	0.125149	1.09062	up	1.57365	0.654115	1.57365	up	1.14891	0.200271	1.14891	up	1.14069	0.189911	1.14069	up	-0.345707	-0.220557	0.308409	-0.145436	-0.155795	3981	Hs.166091	gb:NM_002312.1 /DB_XREF=gi:4504996 /GEN=LIG4 /FEA=FLmRNA /CNT=15 /TID=Hs.166091.0 /TIER=FL /STK=0 /UG=Hs.166091 /LL=3981 /DEF=Homo sapiens ligase IV, DNA, ATP-dependent (LIG4), mRNA. /PROD=DNA ligase IV /FL=gb:NM_002312.1
	243578_at	0.0137055	1.3802	0.464872	1.3802	up	1.53066	0.614154	1.53066	up	1.26938	0.344124	1.26938	up	1.15914	0.21305	1.15914	up	-0.232992	0.23188	0.381161	0.111132	-0.0199419		Hs.596739	gb:AW293956 /DB_XREF=gi:6700592 /DB_XREF=UI-H-BW0-aik-d-06-0-UI.s1 /CLONE=IMAGE:2729530 /FEA=EST /CNT=3 /TID=Hs.42993.0 /TIER=ConsEnd /STK=3 /UG=Hs.42993 /UG_TITLE=ESTs
ZNF670	223898_at	0.0137191	-1.16272	-0.217504	1.16272	down	-1.05026	-0.0707465	1.05026	down	-1.0607	-0.0850231	1.0607	down	1.02431	0.0346516	1.02431	up	0.0821593	-0.135345	0.0114128	-0.00286374	0.116811	93474	Hs.732305	gb:BC005360.1 /DB_XREF=gi:13529187 /FEA=FLmRNA /CNT=5 /TID=Hs.330741.0 /TIER=FL /STK=0 /UG=Hs.330741 /DEF=Homo sapiens, clone MGC:12466, mRNA, complete cds. /PROD=Unknown (protein for MGC:12466) /FL=gb:BC005360.1
ZNF79	216486_x_at	0.0137391	-1.08955	-0.123728	1.08955	down	-1.10381	-0.142497	1.10381	down	-1.1868	-0.247076	1.1868	down	-1.10513	-0.144217	1.10513	down	0.137277	0.0135491	-0.00521994	-0.109798	-0.0069396	7633	Hs.522399	gb:X65232.1 /DB_XREF=gi:505547 /FEA=mRNA /CNT=1 /TID=Hs.301114.0 /TIER=ConsEnd /STK=0 /UG=Hs.301114 /LL=7633 /UG_GENE=ZNF79 /DEF=H.sapiens mRNA for Zinc-finger protein (ZNFpT7). /PROD=zinc-finger protein (ZNFpT7)
DHDDS	224064_s_at	0.0137396	1.20201	0.265454	1.20201	up	1.06269	0.0877219	1.06269	up	1.03406	0.0483147	1.03406	up	1.09367	0.129172	1.09367	up	-0.109736	0.155719	-0.0220139	-0.0614211	0.0194358	79947	Hs.369385	gb:BC004117.1 /DB_XREF=gi:13278671 /FEA=FLmRNA /CNT=2 /TID=Hs.225160.1 /TIER=FL /STK=0 /UG=Hs.225160 /LL=79947 /UG_GENE=FLJ13102 /DEF=Homo sapiens, Similar to RIKEN cDNA 3222401G21 gene, clone MGC:11169, mRNA, complete cds. /PROD=Similar to RIKEN cDNA 3222401G21 gene /FL=gb:BC004117.1
NEK5	241310_at	0.0137809	1.00999	0.0143371	1.00999	up	1.1569	0.210267	1.1569	up	1.04057	0.0573789	1.04057	up	1.01967	0.0281039	1.01967	up	-0.0421011	-0.027764	0.168165	0.0152778	-0.0139971	341676		gb:AI685841 /DB_XREF=gi:4897135 /DB_XREF=tt90d12.x1 /CLONE=IMAGE:2248823 /FEA=EST /CNT=4 /TID=Hs.161354.0 /TIER=ConsEnd /STK=4 /UG=Hs.161354 /UG_TITLE=ESTs
FAM86B3P	1562904_s_at	0.0137847	1.09528	0.131303	1.09528	up	-1.01747	-0.0249853	1.01747	down	-1.04028	-0.0569658	1.04028	down	-1.05074	-0.0714017	1.05074	down	0.013045	0.144348	-0.0119403	-0.0439208	-0.0583568	286042	Hs.656318	gb:BC035792.1 /DB_XREF=gi:23243297 /TID=Hs2.397040.1 /CNT=2 /FEA=mRNA /TIER=ConsEnd /STK=0 /UG=Hs.397040 /UG_TITLE=Homo sapiens, Similar to hypothetical protein FLJ10661, clone IMAGE:5725923, mRNA /DEF=Homo sapiens, Similar to hypothetical protein FLJ10661, clone IMAGE:5725923, mRNA.
CCDC82	1554785_at	0.0138303	1.19174	0.253065	1.19174	up	1.16962	0.226035	1.16962	up	1.05654	0.0793541	1.05654	up	1.04814	0.0678375	1.04814	up	-0.108538	0.144527	0.117497	-0.0291839	-0.0407005	79780	Hs.525088	gb:BC018663.1 /DB_XREF=gi:17391457 /TID=Hs2.112250.2 /CNT=4 /FEA=FLmRNA /TIER=FL /STK=1 /LL=79780 /UG_GENE=FLJ23518 /UG=Hs.112250 /DEF=Homo sapiens, clone MGC:2462 IMAGE:2964737, mRNA, complete cds. /PROD=Unknown (protein for MGC:2462) /FL=gb:BC018663.1
HMCES	201677_at	0.0138338	-1.08421	-0.116647	1.08421	down	-1.24869	-0.320417	1.24869	down	-1.10785	-0.14776	1.10785	down	-1.14151	-0.19094	1.14151	down	0.161731	0.0450844	-0.158686	0.0139717	-0.0292084	56941		gb:AI937543 /DB_XREF=gi:5676413 /DB_XREF=wp78f01.x1 /CLONE=IMAGE:2467897 /FEA=FLmRNA /CNT=209 /TID=Hs.110480.0 /TIER=Stack /STK=42 /UG=Hs.110480 /LL=56941 /UG_GENE=DC12 /UG_TITLE=DC12 protein /FL=gb:NM_020187.1 gb:AF201934.1
C11orf80	204922_at	0.0138418	-1.125	-0.169928	1.125	down	-1.27888	-0.354884	1.27888	down	-1.22826	-0.296616	1.22826	down	-1.20891	-0.273713	1.20891	down	0.238853	0.068925	-0.116031	-0.0577623	-0.0348592	79703	Hs.292088	gb:NM_024650.1 /DB_XREF=gi:13375894 /GEN=FLJ22531 /FEA=FLmRNA /CNT=62 /TID=Hs.55613.0 /TIER=FL+Stack /STK=46 /UG=Hs.55613 /LL=79703 /DEF=Homo sapiens hypothetical protein FLJ22531 (FLJ22531), mRNA. /PROD=hypothetical protein FLJ22531 /FL=gb:NM_024650.1
	233035_at	0.0138529	1.03259	0.0462711	1.03259	up	1.09615	0.132441	1.09615	up	1.0609	0.0852863	1.0609	up	1.07968	0.110605	1.07968	up	-0.0555098	-0.00923869	0.0769314	0.0297765	0.055095		Hs.551126	gb:AU146886 /DB_XREF=gi:11008407 /DB_XREF=AU146886 /CLONE=HEMBB1001785 /FEA=mRNA /CNT=6 /TID=Hs.266796.0 /TIER=ConsEnd /STK=3 /UG=Hs.266796 /UG_TITLE=Homo sapiens cDNA FLJ12023 fis, clone HEMBB1001785
MAPK14	211087_x_at	0.0138825	1.79526	0.844189	1.79526	up	2.33846	1.22556	2.33846	up	1.958	0.969381	1.958	up	1.81465	0.85969	1.81465	up	-0.850966	-0.00677681	0.374591	0.118415	0.00872359	1432	Hs.485233	gb:Z25432.1 /DB_XREF=gi:405742 /FEA=FLmRNA /CNT=1 /TID=HsAffx.901138.565 /TIER=FL /STK=0 /DEF=H.sapiens protein-serinethreonine kinase gene, complete CDS. /PROD=protein-serinethreonine kinase /FL=gb:Z25432.1
ZNF160	1567032_s_at	0.0139035	-1.0288	-0.0409585	1.0288	down	-1.15975	-0.213812	1.15975	down	-1.23	-0.298661	1.23	down	-1.37483	-0.459252	1.37483	down	0.303371	0.262412	0.0895587	0.00471017	-0.155881	90338	Hs.655967	gb:X78928.1 /DB_XREF=gi:498728 /TID=Hs2.381292.1 /CNT=1 /FEA=mRNA /TIER=ConsEnd /STK=0 /LL=7715 /UG_GENE=ZNF160 /UG=Hs.381292 /UG_TITLE=zinc finger protein 160 /DEF=H.sapiens HZF5 mRNA for zinc finger protein.
IDI1	242065_x_at	0.0139574	1.0351	0.0497683	1.0351	up	1.18179	0.240972	1.18179	up	1.17946	0.238127	1.17946	up	1.09072	0.125276	1.09072	up	-0.124377	-0.0746089	0.116595	0.11375	0.000898457	3422	Hs.283652	gb:BG477984 /DB_XREF=gi:13410263 /DB_XREF=602522982F1 /CLONE=IMAGE:4641356 /FEA=EST /CNT=6 /TID=Hs.147801.0 /TIER=ConsEnd /STK=0 /UG=Hs.147801 /UG_TITLE=ESTs
RAB32	204214_s_at	0.0139645	1.30948	0.388995	1.30948	up	1.50721	0.591884	1.50721	up	1.4044	0.489951	1.4044	up	1.40666	0.49227	1.40666	up	-0.362415	0.0265799	0.229469	0.127535	0.129854	10981	Hs.287714	gb:NM_006834.1 /DB_XREF=gi:5803132 /GEN=RAB32 /FEA=FLmRNA /CNT=73 /TID=Hs.32217.0 /TIER=FL /STK=0 /UG=Hs.32217 /LL=10981 /DEF=Homo sapiens RAB32, member RAS oncogene family (RAB32), mRNA. /PROD=RAB32, member RAS oncogene family /FL=gb:NM_006834.1 gb:U71127.1
ACTA2	243140_at	0.0139745	-1.04781	-0.0673724	1.04781	down	1.06882	0.0960215	1.06882	up	1.01885	0.0269486	1.01885	up	1.01303	0.0186823	1.01303	up	-0.0197747	-0.0871471	0.0762468	0.0071739	-0.00109239	59	Hs.500483	gb:AI917901 /DB_XREF=gi:5637756 /DB_XREF=tz14d04.x1 /CLONE=IMAGE:2288551 /FEA=EST /CNT=4 /TID=Hs.208641.0 /TIER=ConsEnd /STK=3 /UG=Hs.208641 /UG_TITLE=ESTs
LOC100506114	235379_at	0.0139746	-1.12499	-0.169907	1.12499	down	-1.01956	-0.0279531	1.01956	down	-1.0546	-0.0767003	1.0546	down	-1.16403	-0.219131	1.16403	down	0.0687157	-0.101192	0.0407626	-0.00798464	-0.150415	100506114	Hs.632921	gb:AV723880 /DB_XREF=gi:10827716 /DB_XREF=AV723880 /CLONE=HTBAJA10 /FEA=EST /CNT=17 /TID=Hs.332557.0 /TIER=ConsEnd /STK=0 /UG=Hs.332557 /UG_TITLE=ESTs
LIN7A	240027_at	0.0140028	1.84509	0.883693	1.84509	up	2.82986	1.50073	2.82986	up	2.25242	1.17147	2.25242	up	2.03799	1.02715	2.03799	up	-1.02061	-0.136919	0.480121	0.150862	0.00653582	8825		gb:BF062244 /DB_XREF=gi:10821142 /DB_XREF=7k74f09.x1 /CLONE=IMAGE:3481121 /FEA=EST /CNT=4 /TID=Hs.144333.0 /TIER=ConsEnd /STK=4 /UG=Hs.144333 /UG_TITLE=ESTs
ADAT3///SCAMP4	230634_x_at	0.0140235	-1.06726	-0.0939153	1.06726	down	-1.18303	-0.242486	1.18303	down	-1.07558	-0.105113	1.07558	down	1.04605	0.0649534	1.04605	up	0.0873803	-0.006535	-0.155106	-0.0177329	0.152334	113178///113179	Hs.144980	gb:AI820875 /DB_XREF=gi:5439954 /DB_XREF=qp39h05.x5 /CLONE=IMAGE:1925433 /FEA=EST /CNT=21 /TID=Hs.144980.0 /TIER=Stack /STK=14 /UG=Hs.144980 /UG_TITLE=ESTs, Weakly similar to CA13_HUMAN COLLAGEN ALPHA 1(III) CHAIN PRECURSOR (H.sapiens)
MAU2	217652_at	0.0140278	1.05419	0.0761338	1.05419	up	1.02874	0.0408719	1.02874	up	1.07975	0.110694	1.07975	up	1.15638	0.209614	1.15638	up	-0.0664327	0.00970104	-0.0255608	0.0442615	0.143181	23383	Hs.654939	gb:AW157731 /DB_XREF=gi:6229132 /DB_XREF=au86b01.x1 /CLONE=IMAGE:2783113 /FEA=EST /CNT=4 /TID=Hs.270982.0 /TIER=ConsEnd /STK=3 /UG=Hs.270982 /UG_TITLE=ESTs, Moderately similar to ALU7_HUMAN ALU SUBFAMILY SQ SEQUENCE CONTAMINATION WARNING ENTRY (H.sapiens)
NR2F6	209262_s_at	0.0140411	-1.29126	-0.368782	1.29126	down	-1.24816	-0.319798	1.24816	down	-1.3535	-0.436694	1.3535	down	-1.10712	-0.146812	1.10712	down	0.262197	-0.106585	-0.0576011	-0.174497	0.115385	2063	Hs.466148	gb:BC002669.1 /DB_XREF=gi:12803666 /FEA=FLmRNA /CNT=136 /TID=Hs.239752.0 /TIER=FL+Stack /STK=53 /UG=Hs.239752 /LL=2063 /UG_GENE=NR2F6 /DEF=Homo sapiens, nuclear receptor subfamily 2, group F, member 6, clone MGC:4277, mRNA, complete cds. /PROD=nuclear receptor subfamily 2, group F, member 6 /FL=gb:BC002669.1 gb:NM_005234.1
WT1	216953_s_at	0.014052	-1.00839	-0.0120594	1.00839	down	1.00572	0.00822411	1.00572	up	1.06282	0.0879025	1.06282	up	1.19279	0.254336	1.19279	up	-0.0280567	-0.040116	-0.0198325	0.0598459	0.22628	7490	Hs.591980	gb:S75264.1 /DB_XREF=gi:896246 /GEN=WT1 /FEA=mRNA /CNT=1 /TID=Hs.1145.2 /TIER=ConsEnd /STK=0 /UG=Hs.1145 /LL=7490 /DEF=WT1=Wilms tumor suppressor protein (human, fetal kidney, mRNA, 521 nt). /PROD=WT1
VPS35	222387_s_at	0.014055	1.27862	0.354587	1.27862	up	1.52734	0.61102	1.52734	up	1.16212	0.216756	1.16212	up	1.23566	0.305279	1.23566	up	-0.380077	-0.0254901	0.230943	-0.16332	-0.0747982	55737	Hs.454528	gb:BG476669 /DB_XREF=gi:13408948 /DB_XREF=602524959F1 /CLONE=IMAGE:4643318 /FEA=FLmRNA /CNT=418 /TID=Hs.264190.0 /TIER=Stack /STK=14 /UG=Hs.264190 /LL=55737 /UG_GENE=VPS35 /UG_TITLE=vacuolar protein sorting 35 (yeast homolog) /FL=gb:AF191298.2 gb:AF175265.1 gb:AL136888.1 gb:BC002414.1 gb:NM_018206.1 gb:AF183418.1 gb:AF186382.1
	1568190_at	0.0140824	1.02965	0.0421522	1.02965	up	1.09152	0.126335	1.09152	up	1.07934	0.110148	1.07934	up	1.02436	0.0347202	1.02436	up	-0.0585674	-0.0164152	0.0677675	0.0515808	-0.0238472			gb:D16905.1 /DB_XREF=gi:598704 /TID=Hs2.384942.1 /CNT=1 /FEA=mRNA /TIER=ConsEnd /STK=0 /UG=Hs.384942 /UG_TITLE=Human HepG2 3 region cDNA, clone hmd3a06. /DEF=Human HepG2 3 region cDNA, clone hmd3a06.
LINC01139	235599_at	0.0141039	1.09415	0.129808	1.09415	up	1.06065	0.0849434	1.06065	up	1.08139	0.112881	1.08139	up	1.10692	0.146557	1.10692	up	-0.0854733	0.0443351	-0.000529925	0.0274081	0.0610837	339535	Hs.532047	gb:AW105723 /DB_XREF=gi:6076458 /DB_XREF=xd51f07.x1 /CLONE=IMAGE:2597317 /FEA=EST /CNT=10 /TID=Hs.125346.0 /TIER=ConsEnd /STK=1 /UG=Hs.125346 /UG_TITLE=ESTs
URM1	228626_at	0.0141173	-1.14785	-0.198935	1.14785	down	-1.18149	-0.240611	1.18149	down	-1.14701	-0.197874	1.14701	down	-1.27992	-0.356056	1.27992	down	0.243177	0.0442419	0.00256628	0.0453031	-0.112878	81605	Hs.495229	gb:BE388027 /DB_XREF=gi:9333392 /DB_XREF=601283725F1 /CLONE=IMAGE:3605286 /FEA=EST /CNT=16 /TID=Hs.20085.0 /TIER=Stack /STK=13 /UG=Hs.20085 /UG_TITLE=ESTs
	237627_at	0.0141393	-1.12888	-0.174893	1.12888	down	-1.14471	-0.194977	1.14471	down	-1.16793	-0.22396	1.16793	down	-1.14334	-0.193255	1.14334	down	0.201122	0.0262294	0.00614527	-0.0228378	0.00786743			gb:BE669493 /DB_XREF=gi:10030034 /DB_XREF=7e13e10.x1 /CLONE=IMAGE:3282378 /FEA=EST /CNT=5 /TID=Hs.170427.0 /TIER=ConsEnd /STK=5 /UG=Hs.170427 /UG_TITLE=ESTs
ZNF786	239083_at	0.0141436	-1.2918	-0.369383	1.2918	down	-1.04839	-0.0681819	1.04839	down	-1.23912	-0.309312	1.23912	down	-1.16405	-0.219151	1.16405	down	0.196902	-0.172481	0.12872	-0.11241	-0.0222489	136051	Hs.729572	gb:AI560246 /DB_XREF=gi:4510587 /DB_XREF=tq52h07.x1 /CLONE=IMAGE:2212477 /FEA=EST /CNT=8 /TID=Hs.201648.0 /TIER=ConsEnd /STK=0 /UG=Hs.201648 /UG_TITLE=ESTs, Weakly similar to ZN42_HUMAN ZINC FINGER PROTEIN 42 (H.sapiens)
	243147_x_at	0.0141576	-1.0427	-0.0603242	1.0427	down	1.03965	0.0560982	1.03965	up	-1.07188	-0.100149	1.07188	down	-1.21394	-0.279694	1.21394	down	0.0881623	0.0278381	0.14426	-0.0119865	-0.191532		Hs.601919	gb:AW118707 /DB_XREF=gi:6087291 /DB_XREF=xd95g01.x1 /CLONE=IMAGE:2605392 /FEA=EST /CNT=3 /TID=Hs.329686.0 /TIER=ConsEnd /STK=3 /UG=Hs.329686 /UG_TITLE=ESTs, Weakly similar to unnamed protein product (H.sapiens)
SSFA2	229744_at	0.0141589	1.63452	0.708869	1.63452	up	1.56295	0.644276	1.56295	up	1.33163	0.413193	1.33163	up	1.38288	0.467681	1.38288	up	-0.488694	0.220175	0.155583	-0.0755002	-0.0210127	6744		gb:AL556611 /DB_XREF=gi:12899445 /DB_XREF=AL556611 /CLONE=CS0DK006YL02 (5 prime) /FEA=EST /CNT=12 /TID=Hs.135125.0 /TIER=Stack /STK=8 /UG=Hs.135125 /UG_TITLE=ESTs
	235438_at	0.0141897	1.01008	0.014466	1.01008	up	-1.01849	-0.0264356	1.01849	down	1.02905	0.0413078	1.02905	up	1.06471	0.0904617	1.06471	up	-0.0218651	-0.00739906	-0.0483007	0.0194427	0.0685966		Hs.657330	gb:AW162011 /DB_XREF=gi:6301044 /DB_XREF=au72d05.x1 /CLONE=IMAGE:2781801 /FEA=EST /CNT=10 /TID=Hs.146226.0 /TIER=ConsEnd /STK=6 /UG=Hs.146226 /UG_TITLE=ESTs
	220856_x_at	0.0142077	-1.03359	-0.0476618	1.03359	down	1.09116	0.125864	1.09116	up	-1.02013	-0.0287586	1.02013	down	-1.03848	-0.0544801	1.03848	down	-0.00701845	-0.0546803	0.118846	-0.0357771	-0.0614985			gb:NM_014128.1 /DB_XREF=gi:7662555 /GEN=PRO0470 /FEA=FLmRNA /CNT=3 /TID=Hs.278937.0 /TIER=FL /STK=0 /UG=Hs.278937 /LL=29047 /DEF=Homo sapiens PRO0470 protein (PRO0470), mRNA. /PROD=PRO0470 protein /FL=gb:NM_014128.1 gb:AF090928.1
	221275_s_at	0.0142364	-1.02225	-0.0317411	1.02225	down	1.11038	0.151047	1.11038	up	-1.02808	-0.0399509	1.02808	down	-1.09818	-0.135113	1.09818	down	0.0456561	0.013915	0.196703	0.00570516	-0.0894571			gb:NM_030896.1 /DB_XREF=gi:13591867 /GEN=FLJ13520 /FEA=FLmRNA /CNT=1 /TID=HsAffx.900157.31 /TIER=FL /STK=0 /DEF=Homo sapiens hypothetical protein FLJ13520 (FLJ13520), mRNA. /PROD=hypothetical protein FLJ13520 /FL=gb:NM_030896.1
SNTG1	220405_at	0.0142438	1.02375	0.0338613	1.02375	up	1.1189	0.162082	1.1189	up	1.10768	0.147544	1.10768	up	1.02009	0.0286913	1.02009	up	-0.0557733	-0.021912	0.106309	0.0917708	-0.0270819	54212	Hs.584914	gb:NM_018967.1 /DB_XREF=gi:9507162 /GEN=SNTG1 /FEA=FLmRNA /CNT=8 /TID=Hs.167481.0 /TIER=FL /STK=0 /UG=Hs.167481 /LL=54212 /DEF=Homo sapiens syntrophin, gamma 1 (SNTG1), mRNA. /PROD=syntrophin, gamma 1 /FL=gb:NM_018967.1
	1566504_at	0.0142588	1.03112	0.0442176	1.03112	up	1.26494	0.339073	1.26494	up	1.12793	0.173675	1.12793	up	1.047	0.0662607	1.047	up	-0.0872288	-0.0430112	0.251844	0.0864465	-0.0209681		Hs.638905	gb:BC035155.1 /DB_XREF=gi:23273361 /TID=Hs2.385560.1 /CNT=1 /FEA=mRNA /TIER=ConsEnd /STK=0 /UG=Hs.385560 /UG_TITLE=Homo sapiens, clone IMAGE:5265199, mRNA /DEF=Homo sapiens, clone IMAGE:5265199, mRNA.
LIN7A	227929_at	0.0142671	1.43458	0.520632	1.43458	up	1.9569	0.96857	1.9569	up	1.80611	0.852887	1.80611	up	1.4318	0.517832	1.4318	up	-0.798254	-0.277622	0.170316	0.0546331	-0.280421	8825	Hs.586760	gb:AU151342 /DB_XREF=gi:11012863 /DB_XREF=AU151342 /CLONE=NT2RP2004982 /FEA=mRNA /CNT=28 /TID=Hs.22545.0 /TIER=Stack /STK=15 /UG=Hs.22545 /UG_TITLE=Homo sapiens cDNA FLJ12935 fis, clone NT2RP2004982
SIK3	213034_at	0.0142845	-1.22916	-0.297671	1.22916	down	-1.24103	-0.31154	1.24103	down	-1.12509	-0.170045	1.12509	down	-1.23002	-0.298686	1.23002	down	0.170322	-0.127349	-0.141217	0.000277463	-0.128364	23387	Hs.167451	gb:AB023216.1 /DB_XREF=gi:4589641 /GEN=KIAA0999 /FEA=mRNA /CNT=71 /TID=Hs.4278.1 /TIER=Stack /STK=46 /UG=Hs.4278 /LL=23387 /DEF=Homo sapiens mRNA for KIAA0999 protein, partial cds. /PROD=KIAA0999 protein
LOC105379809	234517_at	0.0143026	1.06138	0.085937	1.06138	up	1.09841	0.135414	1.09841	up	1.05785	0.0811314	1.05785	up	1.01989	0.0284168	1.01989	up	-0.0685174	0.0174196	0.0668965	0.0126141	-0.0401005	105379809		gb:AL050039.1 /DB_XREF=gi:4884280 /FEA=mRNA /CNT=1 /TID=Hs.306308.0 /TIER=ConsEnd /STK=0 /UG=Hs.306308 /UG_TITLE=Homo sapiens mRNA; cDNA DKFZp566K0324 (from clone DKFZp566K0324) /DEF=Homo sapiens mRNA; cDNA DKFZp566K0324 (from clone DKFZp566K0324).
ABCG1	211113_s_at	0.0143032	-1.22617	-0.294159	1.22617	down	-1.33972	-0.42193	1.33972	down	-1.21391	-0.279656	1.21391	down	-1.28142	-0.357746	1.28142	down	0.332154	0.0379954	-0.089776	0.0524983	-0.0255915	9619	Hs.124649	gb:U34919.1 /DB_XREF=gi:1314276 /GEN=white /FEA=FLmRNA /CNT=1 /TID=Hs.10237.6 /TIER=FL /STK=0 /UG=Hs.10237 /LL=9619 /DEF=Human white homolog (white) mRNA, complete cds. /PROD=white homolog /FL=gb:U34919.1
MOG	214650_x_at	0.0143034	1.02411	0.03437	1.02411	up	1.11278	0.154175	1.11278	up	1.03964	0.0560898	1.03964	up	-1.04139	-0.0585097	1.04139	down	-0.0308709	0.00349906	0.123304	0.0252189	-0.0893806	4340	Hs.141308	gb:AL050328 /DB_XREF=gi:7530094 /FEA=FLmRNA /CNT=4 /TID=Hs.141308.2 /TIER=ConsEnd /STK=0 /UG=Hs.141308 /LL=4340 /UG_GENE=MOG /UG_TITLE=myelin oligodendrocyte glycoprotein /DEF=Human DNA sequence from clone RP11-145L22 on chromosome 6p21.32-22.2. Contains the gene for myelinoligodendrocyte glycoprotein MOG, (part of) the gene for a novel KRAB box containing C2H2 type zinc finger protein, ESTs, STS…
TCAIM	241666_at	0.0143053	1.49298	0.57819	1.49298	up	1.60549	0.683014	1.60549	up	1.35888	0.442414	1.35888	up	1.46382	0.549735	1.46382	up	-0.391527	0.186663	0.291487	0.0508863	0.158208	285343	Hs.55131	gb:BG493222 /DB_XREF=gi:13454734 /DB_XREF=602541908F1 /CLONE=IMAGE:4673113 /FEA=EST /CNT=7 /TID=Hs.90462.0 /TIER=ConsEnd /STK=0 /UG=Hs.90462 /UG_TITLE=ESTs, Weakly similar to C35B8.3 (C.elegans)
IFT81	219372_at	0.0143133	-1.14417	-0.194297	1.14417	down	-1.04073	-0.0575951	1.04073	down	-1.09884	-0.135986	1.09884	down	-1.10891	-0.149141	1.10891	down	0.101696	-0.0926008	0.0441006	-0.03429	-0.0474449	28981	Hs.528382	gb:NM_014055.1 /DB_XREF=gi:7661539 /GEN=CDV-1 /FEA=FLmRNA /CNT=42 /TID=Hs.108881.0 /TIER=FL+Stack /STK=22 /UG=Hs.108881 /LL=28981 /DEF=Homo sapiens CDV-1 protein (CDV-1), mRNA. /PROD=CDV-1 protein /FL=gb:NM_014055.1 gb:AF078932.1
	215403_at	0.014317	-1.15698	-0.210361	1.15698	down	-1.10238	-0.140627	1.10238	down	-1.11964	-0.163029	1.11964	down	-1.12716	-0.172697	1.12716	down	0.17079	-0.0395711	0.0301631	0.00776061	-0.00190692		Hs.677283	gb:AK024860.1 /DB_XREF=gi:10437268 /FEA=mRNA /CNT=4 /TID=Hs.306708.0 /TIER=ConsEnd /STK=0 /UG=Hs.306708 /UG_TITLE=Homo sapiens cDNA: FLJ21207 fis, clone COL00362 /DEF=Homo sapiens cDNA: FLJ21207 fis, clone COL00362.
	242312_x_at	0.0143565	1.23202	0.301021	1.23202	up	1.50929	0.593872	1.50929	up	1.33019	0.411635	1.33019	up	1.47749	0.563148	1.47749	up	-0.359302	-0.0582808	0.23457	0.0523327	0.203846		Hs.598509	gb:AV736963 /DB_XREF=gi:10854544 /DB_XREF=AV736963 /CLONE=CBFBOH07 /FEA=EST /CNT=5 /TID=Hs.323560.0 /TIER=ConsEnd /STK=1 /UG=Hs.323560 /UG_TITLE=ESTs
LINC01254	1561083_at	0.0143698	1.04107	0.0580686	1.04107	up	-1.00134	-0.00193275	1.00134	down	1.08125	0.112698	1.08125	up	1.07473	0.103976	1.07473	up	-0.0438186	0.01425	-0.0457514	0.0688793	0.0601577	101927350	Hs.738016	gb:BC040323.1 /DB_XREF=gi:25955628 /TID=Hs2.434283.1 /CNT=3 /FEA=mRNA /TIER=ConsEnd /STK=1 /UG=Hs.434283 /UG_TITLE=Homo sapiens, clone IMAGE:4827605, mRNA /DEF=Homo sapiens, clone IMAGE:4827605, mRNA.
	211454_x_at	0.0143908	1.03759	0.0532433	1.03759	up	1.25194	0.32417	1.25194	up	1.13237	0.179347	1.13237	up	1.00476	0.0068571	1.00476	up	-0.0906865	-0.0374432	0.233483	0.0886606	-0.0838294			gb:AF336878.1 /DB_XREF=gi:13384184 /GEN=FKSG51 /FEA=FLmRNA /CNT=1 /TID=Hs.326752.0 /TIER=FL /STK=0 /UG=Hs.326752 /DEF=Homo sapiens FKSG51 (FKSG51) mRNA, complete cds. /PROD=FKSG51 /FL=gb:AF336878.1
	1561856_at	0.0144083	1.03155	0.0448158	1.03155	up	1.19491	0.256902	1.19491	up	1.07659	0.106475	1.07659	up	1.0488	0.0687438	1.0488	up	-0.0623695	-0.0175537	0.194532	0.0441051	0.00637434		Hs.398148	gb:BC030088.1 /DB_XREF=gi:20988335 /TID=Hs2.398148.1 /CNT=5 /FEA=mRNA /TIER=ConsEnd /STK=0 /UG=Hs.398148 /UG_TITLE=Homo sapiens, clone IMAGE:4792693, mRNA /DEF=Homo sapiens, clone IMAGE:4792693, mRNA.
STXBP4	1554328_at	0.0144088	1.01044	0.0149899	1.01044	up	1.05525	0.0775851	1.05525	up	-1.00917	-0.0131757	1.00917	down	1.03401	0.048251	1.03401	up	-0.0162965	-0.00130656	0.0612886	-0.0294722	0.0319545	252983	Hs.35199	gb:BC041485.1 /DB_XREF=gi:27370767 /TID=Hs2.434441.1 /CNT=4 /FEA=FLmRNA /TIER=FL /STK=2 /UG=Hs.434441 /DEF=Homo sapiens, Similar to syntaxin binding protein 4, clone MGC:50337 IMAGE:5491176, mRNA, complete cds. /PROD=Similar to syntaxin binding protein 4 /FL=gb:BC041485.1
DND1	222070_at	0.0144307	-1.14609	-0.196719	1.14609	down	-1.15839	-0.212127	1.15839	down	-1.10406	-0.142816	1.10406	down	-1.03512	-0.0498006	1.03512	down	0.135045	-0.0616734	-0.0770813	-0.00777015	0.0852449	373863	Hs.591262	gb:AW090043 /DB_XREF=gi:6047387 /DB_XREF=xd01c05.x1 /CLONE=IMAGE:2592488 /FEA=EST /CNT=13 /TID=Hs.326464.0 /TIER=Stack /STK=13 /UG=Hs.326464 /UG_TITLE=Homo sapiens cDNA: FLJ21702 fis, clone COL09874
	1566696_at	0.0144473	1.04491	0.0633756	1.04491	up	1.10249	0.140768	1.10249	up	1.05959	0.0835004	1.05959	up	1.13921	0.188031	1.13921	up	-0.0822753	-0.0188997	0.058493	0.00122516	0.105756		Hs.567066	gb:BC043200.1 /DB_XREF=gi:27693269 /TID=Hs2.438483.1 /CNT=1 /FEA=mRNA /TIER=ConsEnd /STK=0 /UG=Hs.438483 /UG_TITLE=Homo sapiens, clone IMAGE:5289071, mRNA /DEF=Homo sapiens, clone IMAGE:5289071, mRNA.
ZFYVE16	203651_at	0.0144526	1.3859	0.470821	1.3859	up	1.62004	0.696029	1.62004	up	1.36443	0.448299	1.36443	up	1.14518	0.195571	1.14518	up	-0.470356	0.000464757	0.225672	-0.0220573	-0.274786	9765	Hs.482660	gb:NM_014733.1 /DB_XREF=gi:7662047 /GEN=KIAA0305 /FEA=FLmRNA /CNT=95 /TID=Hs.83790.0 /TIER=FL /STK=7 /UG=Hs.83790 /LL=9765 /DEF=Homo sapiens KIAA0305 gene product (KIAA0305), mRNA. /PROD=KIAA0305 gene product /FL=gb:AB002303.1 gb:NM_014733.1
RRP1	218758_s_at	0.0144529	-1.15533	-0.208304	1.15533	down	-1.19731	-0.259792	1.19731	down	-1.14697	-0.197833	1.14697	down	-1.18522	-0.245151	1.18522	down	0.193744	-0.0145605	-0.0660485	-0.00408992	-0.0514071	8568	Hs.110757	gb:NM_003683.1 /DB_XREF=gi:4503246 /GEN=D21S2056E /FEA=FLmRNA /CNT=90 /TID=Hs.110757.0 /TIER=FL /STK=0 /UG=Hs.110757 /LL=8568 /DEF=Homo sapiens DNA segment on chromosome 21 (unique) 2056 expressed sequence (D21S2056E), mRNA. /PROD=NNP-1Nop52, novel nuclear protein 1 /FL=gb:BC000380.1 gb:NM_003683.1 gb:U79775.1
	214316_x_at	0.0144602	-1.18667	-0.246914	1.18667	down	-1.20902	-0.273844	1.20902	down	-1.30241	-0.381184	1.30241	down	-1.41339	-0.499158	1.41339	down	0.363319	0.116404	0.089475	-0.0178648	-0.135839			gb:AI378706 /DB_XREF=gi:4188559 /DB_XREF=tb91f09.x1 /CLONE=IMAGE:2061737 /FEA=EST /CNT=13 /TID=Hs.16488.3 /TIER=Stack /STK=13 /UG=Hs.16488 /LL=811 /UG_GENE=CALR /UG_TITLE=calreticulin
MALAT1	226675_s_at	0.0144638	-1.22211	-0.28937	1.22211	down	-1.31823	-0.398604	1.31823	down	-1.4224	-0.508329	1.4224	down	-1.69217	-0.758873	1.69217	down	0.286533	-0.00283633	-0.112071	-0.221796	-0.472339	378938	Hs.621695	gb:W80468 /DB_XREF=gi:1391485 /DB_XREF=zd82g05.s1 /CLONE=IMAGE:347192 /FEA=EST /CNT=35 /TID=Hs.279789.8 /TIER=Stack /STK=13 /UG=Hs.279789 /LL=8841 /UG_GENE=HDAC3 /UG_TITLE=histone deacetylase 3
ARHGAP29	203910_at	0.0144789	1.2984	0.376731	1.2984	up	1.8361	0.876645	1.8361	up	1.08405	0.116431	1.08405	up	-1.06495	-0.0907806	1.06495	down	-0.311495	0.0652353	0.56515	-0.195064	-0.402276	9411	Hs.483238	gb:NM_004815.1 /DB_XREF=gi:4758881 /GEN=PARG1 /FEA=FLmRNA /CNT=91 /TID=Hs.70983.0 /TIER=FL+Stack /STK=17 /UG=Hs.70983 /LL=9411 /DEF=Homo sapiens PTPL1-associated RhoGAP 1 (PARG1), mRNA. /PROD=PTPL1-associated RhoGAP 1 /FL=gb:U90920.1 gb:NM_004815.1
WIZ	221783_at	0.0144936	-1.16701	-0.222812	1.16701	down	-1.06574	-0.0918547	1.06574	down	-1.14985	-0.201449	1.14985	down	-1.16082	-0.215145	1.16082	down	0.151084	-0.071728	0.0592297	-0.0503644	-0.0640609	58525	Hs.442138	gb:W67467 /DB_XREF=gi:1376338 /DB_XREF=zd43f11.r1 /CLONE=IMAGE:343437 /FEA=mRNA /CNT=138 /TID=Hs.193065.0 /TIER=Stack /STK=9 /UG=Hs.193065 /LL=58525 /UG_GENE=LOC58525 /UG_TITLE=hypothetical protein DKFZp547M136 similar to widely-interspaced zinc finger motifs
ITGA2B	216956_s_at	0.0145216	1.39769	0.483039	1.39769	up	1.10614	0.145535	1.10614	up	1.70758	0.77195	1.70758	up	2.38388	1.25331	2.38388	up	-0.395037	0.0880025	-0.249502	0.376913	0.858276	3674	Hs.411312	gb:AF098114.1 /DB_XREF=gi:4063696 /FEA=mRNA /CNT=1 /TID=Hs.785.1 /TIER=ConsEnd /STK=0 /UG=Hs.785 /LL=3674 /UG_GENE=ITGA2B /DEF=Homo sapiens truncated alpha IIb protein mRNA, partial cds. /PROD=truncated alpha IIb protein
	234723_x_at	0.0145251	-1.09106	-0.125736	1.09106	down	1.32586	0.406924	1.32586	up	1.10981	0.150309	1.10981	up	-1.14531	-0.195739	1.14531	down	-0.0527828	-0.178519	0.354141	0.0975266	-0.248522		Hs.677287	gb:AK024881.1 /DB_XREF=gi:10437293 /FEA=mRNA /CNT=1 /TID=Hs.306716.0 /TIER=ConsEnd /STK=0 /UG=Hs.306716 /UG_TITLE=Homo sapiens cDNA: FLJ21228 fis, clone COL00739 /DEF=Homo sapiens cDNA: FLJ21228 fis, clone COL00739.
	1564933_at	0.0145642	1.01216	0.0174328	1.01216	up	1.2485	0.320198	1.2485	up	1.15829	0.212001	1.15829	up	1.09735	0.134029	1.09735	up	-0.120069	-0.102636	0.200129	0.0919324	0.0139605		Hs.684548	gb:AK024616.1 /DB_XREF=gi:10436932 /TID=Hs2.383618.1 /CNT=1 /FEA=mRNA /TIER=ConsEnd /STK=0 /UG=Hs.383618 /UG_TITLE=Homo sapiens cDNA: FLJ20963 fis, clone ADSH00818. /DEF=Homo sapiens cDNA: FLJ20963 fis, clone ADSH00818.
IL17RC	64440_at	0.0146349	1.04405	0.0621975	1.04405	up	1.09656	0.132991	1.09656	up	1.13086	0.177423	1.13086	up	1.14395	0.194024	1.14395	up	-0.111753	-0.0495553	0.0212378	0.0656698	0.0822712	84818	Hs.129959	Cluster Incl. AI560217:tq52d02.x1 Homo sapiens cDNA, 3 end /clone=IMAGE-2212419 /clone_end=3' /gb=AI560217 /gi=4510558 /ug=Hs.54849 /len=494
	232957_x_at	0.0146699	-1.02352	-0.033536	1.02352	down	1.04661	0.0657302	1.04661	up	-1.04121	-0.0582556	1.04121	down	-1.10701	-0.146669	1.10701	down	0.0294409	-0.00409508	0.0951711	-0.0288147	-0.117228		Hs.301858	gb:AU152301 /DB_XREF=gi:11013822 /DB_XREF=AU152301 /CLONE=NT2RP3000628 /FEA=mRNA /CNT=6 /TID=Hs.301858.0 /TIER=ConsEnd /STK=1 /UG=Hs.301858 /UG_TITLE=Homo sapiens cDNA FLJ13017 fis, clone NT2RP3000628
CLINT1	201768_s_at	0.0146753	1.38652	0.471464	1.38652	up	1.56353	0.644811	1.56353	up	1.30269	0.381491	1.30269	up	1.32878	0.4101	1.32878	up	-0.275247	0.196216	0.369563	0.106244	0.134853	9685	Hs.644000	gb:BC004467.1 /DB_XREF=gi:13325306 /FEA=FLmRNA /CNT=218 /TID=Hs.155623.0 /TIER=FL+Stack /STK=11 /UG=Hs.155623 /LL=9685 /UG_GENE=KIAA0171 /DEF=Homo sapiens, KIAA0171 gene product, clone MGC:10257, mRNA, complete cds. /PROD=KIAA0171 gene product /FL=gb:NM_014666.1 gb:D79993.1 gb:BC004467.1
	1562342_at	0.0147194	1.12478	0.169639	1.12478	up	1.11712	0.159788	1.11712	up	1.08085	0.112161	1.08085	up	1.12167	0.165648	1.12167	up	-0.0868646	0.0827748	0.0729236	0.0252968	0.0787834		Hs.681811	gb:AL713717.1 /DB_XREF=gi:19584445 /TID=Hs2.375789.1 /CNT=2 /FEA=mRNA /TIER=ConsEnd /STK=0 /UG=Hs.375789 /UG_TITLE=Homo sapiens mRNA; cDNA DKFZp667G1416 (from clone DKFZp667G1416) /DEF=Homo sapiens mRNA; cDNA DKFZp667G1416 (from clone DKFZp667G1416).
SOS2	217576_x_at	0.0147312	1.50056	0.5855	1.50056	up	1.75724	0.813308	1.75724	up	1.59595	0.67442	1.59595	up	1.50283	0.587682	1.50283	up	-0.574734	0.0107656	0.238573	0.0996854	0.0129474	6655	Hs.291533	gb:BF692958 /DB_XREF=gi:11978366 /DB_XREF=602080393F1 /CLONE=IMAGE:4244831 /FEA=EST /CNT=7 /TID=Hs.333042.1 /TIER=ConsEnd /STK=0 /UG=Hs.333042 /UG_TITLE=Homo sapiens similar to son of sevenless (Drosophila) homolog 1 (H. sapiens) (LOC63378), mRNA
	234604_at	0.0147482	1.19147	0.252737	1.19147	up	1.5034	0.58823	1.5034	up	1.39081	0.475926	1.39081	up	1.29228	0.369923	1.29228	up	-0.259502	-0.00676484	0.328728	0.216424	0.110421		Hs.677287	gb:AK024881.1 /DB_XREF=gi:10437293 /FEA=mRNA /CNT=1 /TID=Hs.306716.0 /TIER=ConsEnd /STK=0 /UG=Hs.306716 /UG_TITLE=Homo sapiens cDNA: FLJ21228 fis, clone COL00739 /DEF=Homo sapiens cDNA: FLJ21228 fis, clone COL00739.
PRND	222106_at	0.0147624	1.01003	0.0144001	1.01003	up	1.08606	0.119105	1.08606	up	1.10141	0.139348	1.10141	up	1.12038	0.163983	1.12038	up	-0.0698381	-0.055438	0.0492667	0.0695096	0.0941445	23627	Hs.406696	gb:AL133396 /DB_XREF=gi:6562003 /FEA=FLmRNA /CNT=18 /TID=Hs.121281.1 /TIER=ConsEnd /STK=4 /UG=Hs.121281 /LL=23627 /UG_GENE=PRND /UG_TITLE=prion gene complex, downstream /DEF=Human DNA sequence from clone RP5-1068H6 on chromosome 20q11.1-11.23. Contains a pseudogene similar to IDI1 (isopentenyl-diphosphate delta isomerase), the gene for the prion protein like doppel protein, the PRNP gene for prio…
	230456_at	0.0147773	-1.18776	-0.248249	1.18776	down	-1.18217	-0.241443	1.18217	down	-1.21038	-0.275457	1.21038	down	-1.15302	-0.205413	1.15302	down	0.204328	-0.0439209	-0.0371141	-0.0711282	-0.00108447		Hs.656475	gb:BE501559 /DB_XREF=gi:9703967 /DB_XREF=hw33g11.x1 /CLONE=IMAGE:3184772 /FEA=EST /CNT=11 /TID=Hs.211558.0 /TIER=Stack /STK=10 /UG=Hs.211558 /UG_TITLE=ESTs
RHOBTB3	202975_s_at	0.0147838	1.30087	0.379473	1.30087	up	1.13477	0.182401	1.13477	up	1.07655	0.106418	1.07655	up	1.30848	0.38789	1.30848	up	-0.0956496	0.283824	0.0867515	0.0107683	0.29224	22836	Hs.445030	gb:N21138 /DB_XREF=gi:1126308 /DB_XREF=yx52h03.s1 /CLONE=IMAGE:265397 /FEA=FLmRNA /CNT=168 /TID=Hs.188006.0 /TIER=Stack /STK=36 /UG=Hs.188006 /LL=22836 /UG_GENE=KIAA0878 /UG_TITLE=KIAA0878 protein /FL=gb:NM_014899.1 gb:AB020685.1
TSR1	239042_at	0.0147971	-1.23428	-0.303667	1.23428	down	-1.23604	-0.305729	1.23604	down	-1.1635	-0.218476	1.1635	down	-1.15534	-0.208321	1.15534	down	0.21744	-0.086227	-0.0882891	-0.00103692	0.0091188	55720	Hs.388170	gb:AI282511 /DB_XREF=gi:3920744 /DB_XREF=qv04e04.x1 /CLONE=IMAGE:1980606 /FEA=EST /CNT=7 /TID=Hs.194364.0 /TIER=ConsEnd /STK=0 /UG=Hs.194364 /UG_TITLE=ESTs, Weakly similar to AF119917 62 PRO2822 (H.sapiens)
VAC14	218169_at	0.0148056	-1.18001	-0.238797	1.18001	down	-1.34181	-0.424179	1.34181	down	-1.27893	-0.354943	1.27893	down	-1.14215	-0.191749	1.14215	down	0.177937	-0.06086	-0.246243	-0.177006	-0.0138119	55697	Hs.445061	gb:NM_018052.1 /DB_XREF=gi:8922339 /GEN=FLJ10305 /FEA=FLmRNA /CNT=108 /TID=Hs.5894.0 /TIER=FL+Stack /STK=49 /UG=Hs.5894 /LL=55697 /DEF=Homo sapiens hypothetical protein FLJ10305 (FLJ10305), mRNA. /PROD=hypothetical protein FLJ10305 /FL=gb:NM_018052.1 gb:BC000536.1
ACTG1	224585_x_at	0.0148181	1.09111	0.125802	1.09111	up	1.12026	0.163832	1.12026	up	1.08815	0.121882	1.08815	up	1.08678	0.120059	1.08678	up	-0.106776	0.0190256	0.0570556	0.0151055	0.0132825	71	Hs.514581	gb:AA703939 /DB_XREF=gi:2713857 /DB_XREF=ag46c12.s1 /CLONE=IMAGE:1119862 /FEA=EST /CNT=359 /TID=Hs.14376.6 /TIER=Stack /STK=271 /UG=Hs.14376 /LL=71 /UG_GENE=ACTG1 /UG_TITLE=actin, gamma 1
CHRNA9	221107_at	0.0148313	1.13989	0.188896	1.13989	up	1.06109	0.08555	1.06109	up	1.03686	0.0522181	1.03686	up	1.06121	0.0857128	1.06121	up	-0.0575753	0.131321	0.0279747	-0.00535724	0.0281375	55584	Hs.272278	gb:NM_017581.1 /DB_XREF=gi:8923741 /GEN=CHRNA9 /FEA=FLmRNA /CNT=2 /TID=Hs.272278.0 /TIER=FL /STK=0 /UG=Hs.272278 /LL=55584 /DEF=Homo sapiens cholinergic receptor, nicotinic, alpha polypeptide 9 (CHRNA9), mRNA. /PROD=cholinergic receptor, nicotinic, alphapolypeptide 9 /FL=gb:NM_017581.1
C14orf28	235369_at	0.0148906	-1.04682	-0.0660192	1.04682	down	-1.27275	-0.347952	1.27275	down	-1.21658	-0.282829	1.21658	down	-1.27438	-0.349795	1.27438	down	0.245295	0.179275	-0.102657	-0.0375349	-0.1045	122525	Hs.82098	gb:BF435952 /DB_XREF=gi:11448267 /DB_XREF=nab75e07.x1 /CLONE=IMAGE:3273685 /FEA=EST /CNT=21 /TID=Hs.82098.0 /TIER=ConsEnd /STK=5 /UG=Hs.82098 /UG_TITLE=ESTs
SV2C	242530_at	0.0149022	1.05576	0.078287	1.05576	up	1.07523	0.10465	1.07523	up	1.12921	0.175312	1.12921	up	1.00681	0.00979048	1.00681	up	-0.0761247	0.00216224	0.0285257	0.0991875	-0.0663342	22987	Hs.646953///Hs.663229	gb:H22448 /DB_XREF=gi:891143 /DB_XREF=yn69d03.s1 /CLONE=IMAGE:173669 /FEA=EST /CNT=4 /TID=Hs.268806.0 /TIER=ConsEnd /STK=3 /UG=Hs.268806 /UG_TITLE=ESTs
	233728_at	0.0149147	-1.29054	-0.367974	1.29054	down	-1.25826	-0.331427	1.25826	down	-1.21979	-0.28663	1.21979	down	-1.35187	-0.43496	1.35187	down	0.322943	-0.0450303	-0.00848365	0.0363133	-0.112017		Hs.691305	gb:AU148213 /DB_XREF=gi:11009734 /DB_XREF=AU148213 /CLONE=MAMMA1002909 /FEA=mRNA /CNT=3 /TID=Hs.301228.0 /TIER=ConsEnd /STK=1 /UG=Hs.301228 /UG_TITLE=Homo sapiens cDNA FLJ14144 fis, clone MAMMA1002909
	224549_x_at	0.0150049	-1.15909	-0.212999	1.15909	down	1.14862	0.199897	1.14862	up	-1.09331	-0.128707	1.09331	down	-1.40824	-0.493897	1.40824	down	0.120247	-0.0927515	0.320144	-0.00845996	-0.37365			gb:AF194537.1 /DB_XREF=gi:11037116 /GEN=NAG13 /FEA=FLmRNA /CNT=1 /TID=HsAffx.900497.1131 /TIER=FL /STK=0 /DEF=Homo sapiens NAG13 (NAG13) mRNA, complete cds. /PROD=NAG13 /FL=gb:AF194537.1
EBF2	1562477_at	0.0150182	1.03108	0.0441629	1.03108	up	1.14412	0.194245	1.14412	up	1.01508	0.0215905	1.01508	up	1.03277	0.0465259	1.03277	up	-0.0305507	0.0136122	0.163694	-0.00896021	0.0159752	64641	Hs.491292	gb:AK001144.1 /DB_XREF=gi:7022214 /TID=Hs2.343814.1 /CNT=2 /FEA=mRNA /TIER=ConsEnd /STK=0 /LL=90868 /UG_GENE=COE2 /UG=Hs.343814 /UG_TITLE=similar to TRANSCRIPTION FACTOR COE2 (EARLY B-CELL FACTOR 2) (EBF-2) (OLF-1EBF-LIKE 3) (OE-3) (OE-3) (METENCEPHALON-MESENCEPHALON-OLFACTORY TRANSCRIPTION FACTOR 1) (MET-MESENCEPHALON-OLFACTORY TRANSCRIPTION FACTOR 1) (MET-MESENCEPHALON-OLFACTORY ... (M. /DEF=Ho…
ID2-AS1	229756_at	0.0150201	1.39798	0.483345	1.39798	up	1.38051	0.465201	1.38051	up	1.46043	0.546393	1.46043	up	1.48027	0.565861	1.48027	up	-0.352186	0.131159	0.113015	0.194207	0.213675	100506299		gb:AI307359 /DB_XREF=gi:4002084 /DB_XREF=tb22d07.x1 /CLONE=IMAGE:2055085 /FEA=EST /CNT=14 /TID=Hs.128064.0 /TIER=Stack /STK=8 /UG=Hs.128064 /UG_TITLE=ESTs
EPHA4	227449_at	0.0150239	-1.48334	-0.568851	1.48334	down	-1.45031	-0.53636	1.45031	down	-1.36953	-0.453678	1.36953	down	-1.41815	-0.504005	1.41815	down	0.541559	-0.0272919	0.00519905	0.0878808	0.0375537	2043	Hs.371218	gb:AI799018 /DB_XREF=gi:5364490 /DB_XREF=we97e07.x1 /CLONE=IMAGE:2349060 /FEA=EST /CNT=43 /TID=Hs.314784.0 /TIER=Stack /STK=23 /UG=Hs.314784 /UG_TITLE=ESTs
CREB5	232555_at	0.0150425	1.40293	0.48844	1.40293	up	1.92628	0.945815	1.92628	up	1.91016	0.933696	1.91016	up	1.66846	0.738513	1.66846	up	-0.80313	-0.31469	0.142685	0.130566	-0.0646163	9586	Hs.437075	gb:AI689210 /DB_XREF=gi:4900504 /DB_XREF=tx82a04.x1 /CLONE=IMAGE:2276046 /FEA=mRNA /CNT=6 /TID=Hs.187276.0 /TIER=ConsEnd /STK=1 /UG=Hs.187276 /UG_TITLE=Homo sapiens cDNA FLJ11431 fis, clone HEMBA1001094
CNOT6L	1553266_at	0.015094	1.0346	0.0490702	1.0346	up	-1.00675	-0.00969897	1.00675	down	1.02321	0.0331034	1.02321	up	-1.04576	-0.0645502	1.04576	down	-0.00815776	0.0409124	-0.0178567	0.0249457	-0.0727079	246175	Hs.592519	gb:NM_144571.1 /DB_XREF=gi:21687267 /TID=Hs2.183085.1 /CNT=5 /FEA=FLmRNA /TIER=FL /STK=1 /LL=246175 /UG_GENE=CNOT6L /UG=Hs.183085 /UG_TITLE=CCR4-NOT transcription complex, subunit 6-like /DEF=Homo sapiens CCR4-NOT transcription complex, subunit 6-like (CNOT6L), mRNA. /FL=gb:NM_144571.1
ZNF551	243194_at	0.0151056	1.13993	0.18894	1.13993	up	1.00392	0.00564153	1.00392	up	1.07134	0.099418	1.07134	up	1.09254	0.127692	1.09254	up	-0.0416362	0.147304	-0.0359947	0.0577818	0.0860562	90233		gb:BF438407 /DB_XREF=gi:11450924 /DB_XREF=7q13a10.x1 /CLONE=IMAGE:3698202 /FEA=EST /CNT=3 /TID=Hs.308199.0 /TIER=ConsEnd /STK=3 /UG=Hs.308199 /UG_TITLE=ESTs, Moderately similar to unnamed protein product (H.sapiens)
LOC105372306	221626_at	0.0151365	-1.26772	-0.342237	1.26772	down	-1.38117	-0.465888	1.38117	down	-1.28431	-0.360995	1.28431	down	-1.26753	-0.342025	1.26753	down	0.352867	0.0106293	-0.113022	-0.00812839	0.0108413	105372306		gb:AL136548.1 /DB_XREF=gi:12052731 /GEN=DKFZp761G18121 /FEA=FLmRNA /CNT=12 /TID=Hs.260180.0 /TIER=FL /STK=0 /UG=Hs.260180 /DEF=Homo sapiens mRNA; cDNA DKFZp761G18121 (from clone DKFZp761G18121); complete cds. /PROD=hypothetical protein /FL=gb:AL136548.1
SOGA1	215852_x_at	0.0151471	-1.03712	-0.0525789	1.03712	down	-1.03937	-0.0557066	1.03937	down	-1.09431	-0.130021	1.09431	down	-1.1718	-0.228725	1.1718	down	0.117753	0.0651741	0.0620464	-0.012268	-0.110972	140710		gb:AK022023.1 /DB_XREF=gi:10433337 /FEA=mRNA /CNT=2 /TID=Hs.287469.0 /TIER=ConsEnd /STK=1 /UG=Hs.287469 /UG_TITLE=Homo sapiens cDNA FLJ11961 fis, clone HEMBB1001020, highly similar to Homo sapiens mRNA for KIAA0889 protein /DEF=Homo sapiens cDNA FLJ11961 fis, clone HEMBB1001020, highly similar to Homo sapiens mRNA for KIAA0889 protein.
ZNF619	1552836_at	0.0151703	1.13232	0.179284	1.13232	up	1.23256	0.301653	1.23256	up	1.17383	0.23123	1.17383	up	1.22469	0.292415	1.22469	up	-0.168483	0.010801	0.133169	0.0627463	0.123932	285267	Hs.407159	gb:NM_173656.1 /DB_XREF=gi:27734906 /TID=Hs2.407159.1 /CNT=5 /FEA=FLmRNA /TIER=FL /STK=2 /LL=285267 /UG_GENE=FLJ90764 /UG=Hs.407159 /UG_TITLE=hypothetical protein FLJ90764 /DEF=Homo sapiens hypothetical protein FLJ90764 (FLJ90764), mRNA. /FL=gb:NM_173656.1
[truncated: 1,964 more rows]

## Sheet: Table S9.2
Gene Symbol	Distance-Based Similarity	[Control](normalized)	[Sepsis](normalized)	[Sepsis gram-negative](normalized)	[Sepsis gram-positive](normalized)	[Sepsis mixed infection](normalized)	Entrez Gene	UniGene ID	Target Description
[truncated: 2 more rows]

## Sheet: Table S9.3
Gene Symbol	Distance-Based Similarity	[Control](normalized)	[Sepsis](normalized)	[Sepsis gram-negative](normalized)	[Sepsis gram-positive](normalized)	[Sepsis mixed infection](normalized)	Entrez Gene	UniGene ID	Target Description
[truncated: 166 more rows]

[truncated: 6 more sheets: Table S9.4, Table S9.5, Table S9.6, Table S9.7, Table S9.8, Table S9.9]
